# Supplementary material for: Inhibitors of Rho kinases (ROCK) induce multiple mitotic defects and synthetic lethality in BRCA2-deficient cells
Source: eLife journal article supplement (doi:10.7554/elife.80254), 2023-04-19
Supplement: supp [file elife-80254-supp-v1.zip]

Figure 5 - figure supplement 1

A

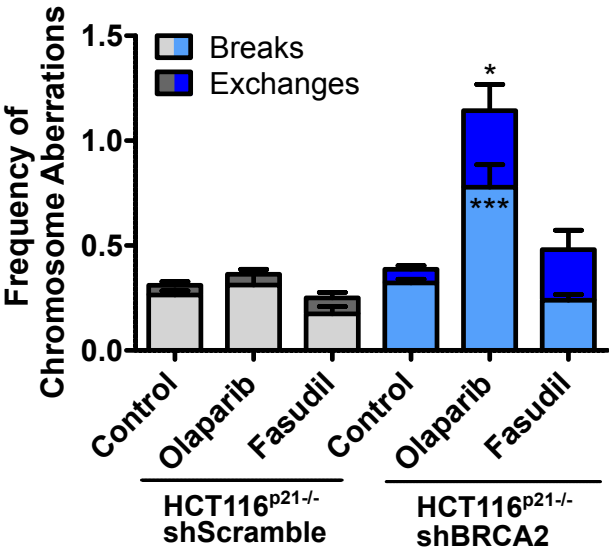

Breaks

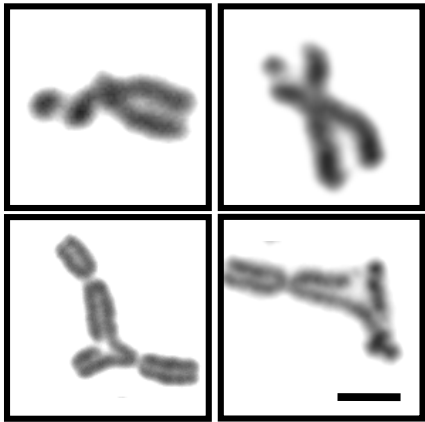

Exchanges

B

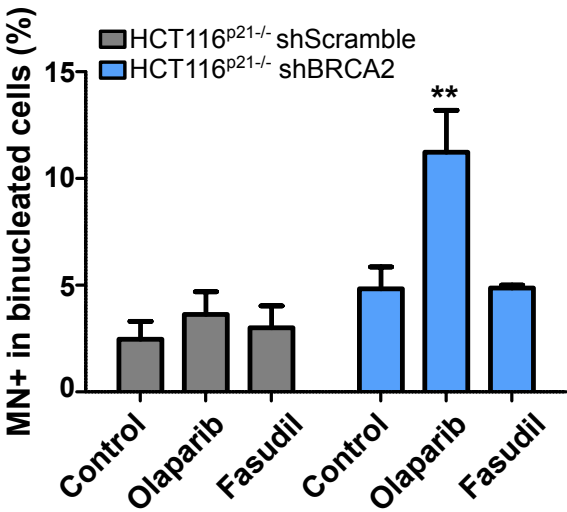

Binucleated cells  
with micronuclei

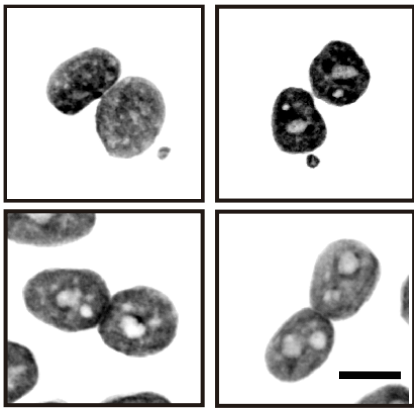

Binucleated cells  
without micronuclei
