# Supplementary material for: Inhibitors of Rho kinases (ROCK) induce multiple mitotic defects and synthetic lethality in BRCA2-deficient cells
Source: eLife journal article supplement (doi:10.7554/elife.80254), 2023-04-19
Supplement: supp [file Figure 1- source data 1.xlsx]

## Sheet: Figure 1 A
	phenotypic screening scheme
The screening assay is based on the co-culture of isogeneic BRCA-proficient and BRCA-deficient cell lines in equal proportions on each well of 96-well plates. Such cell lines were generated as double stable cell lines tagged with different fluorescent proteins (CFP, iRFP, and mCherry) and expressing shRNAs for Scramble, BRCA1 or BRCA2 were generated as described in (Carbajosa et al., 2019).

## Sheet: Figure 1B
qPCR BRCA2
Quantitative real-time PCR of BRCA2 in shScramble and shBRCA2 HCT116p21-/- cells
Description of the Experiment (Title, Comment, Number)
Calculation Procedure for MNE			2
Threshold for SEM in %			20
							Mean of Triplicates
Well	Description	CT of Target Gene	CT of Reference Gene	Normalized Expression			Description	Mean Normalized Expression	SE of Mean Normalized Expression	SE of Mean Normalized Expression in %
A1	shScramble	28.53	17.96	0.0051855			shScramble	0.00558673	0.000508904	9.10915
A2		28.26	17.92	0.006019			shBRCA2	0.000555403	0.000205357	36.9744
A3
A4	shBRCA2	35.32	20.54	0.000406382
A5		34.22	20.4	0.000759069
A6
A7
A8
A9
A10
A11
A12
B1
B2
B3
B4
B5
B6
B7
B8
B9
B10
B11
B12
C1
C2
C3
C4
C5
C6
C7
C8
C9
C10
C11
C12
D1
D2
D3
D4
D5
D6
D7
D8
D9
D10
D11
D12
E1
E2
E3
E4
E5
E6
E7
E8
E9
E10
E11
E12
F1
F2							siLuc	1	0.0910915
F3							siBRCA2	0.0994147	0.036758
F4
F5
F6
F7
F8
F9
F10
F11
F12
G1	sample 25
G2
G3
G4	sample 26
G5
G6
G7	sample 27
G8
G9
G10	sample 28
G11
G12
H1	sample 29
H2
H3
H4	sample 30
H5
H6
H7	sample 31
H8
H9
H10	sample 32
H11
H12

## Sheet: Figure 1B´
Description of the Experiment (Title, Comment, Number)
Calculation Procedure for MNE			2
Threshold for SEM in %			20
							Mean of Triplicates
Well	Description	CT of Target Gene	CT of Reference Gene	Normalized Expression			Description	Mean Normalized Expression	SE of Mean Normalized Expression	SE of Mean Normalized Expression in %
A1	SCR	24.86	35.41	36538.7			SCR	40296.4	4764.08	11.8226
A2		24.66	35.17	34747.9			BRCA2	16982.4	3245.73	19.1123
A3		24.63	35.66	624.146
A4	BRCA2	20.23	30.89	25185.6
A5		20.21	30.2	15068.7
A6		20.73	30.45	302.84
A7
A8
A9
A10
A11
A12
B1
B2
B3
B4
B5
B6
B7
B8
B9
B10
B11
B12
C1
C2
C3
C4
C5
C6
C7
C8
C9
C10
C11
C12
D1
D2
D3
D4
D5
D6
D7
D8
D9
D10
D11
D12
E1
E2
E3
E4
E5
E6
E7
E8
E9
E10
E11
E12
F1
F2							SCR	1	0.118226
F3							BRCA2	0.421437	0.0805464
F4
F5
F6
F7
F8
F9
F10
F11
F12
G1	sample 25
G2
G3
G4	sample 26
G5
G6
G7	sample 27
G8
G9
G10	sample 28
G11
G12
H1	sample 29
H2
H3
H4	sample 30
H5
H6
H7	sample 31
H8
H9
H10	sample 32
H11
H12

## Sheet: Figure 1C
Relative cell number (%)
Relative cell number (%) of HCT116p21-/- cells expressing shScramble and shBRCA2 and treated with the indicated concentrations of olaparib
Well	Cell Count		BRCA2	Exp 1
E - 3	14711			HCT116			Olaparib
E - 5	5120				NT	0.5 uM	0.1 uM	1 uM	1.5 uM
E - 6	5461			WT	19945	15580	16601	13807	12911	Cell Count
E - 8	11668				19535	17530	19079	14754	13380	Cell Count
F - 3	16013				17194	16490	18469	13167	11412	Cell Count
F - 4	9665			shBRCA2	14711	11668	9665	5120	5461	Cell Count
F - 5	6053				16013	11121	7957	6053		Cell Count
F - 8	11121				15523	8532		5736	4262	Cell Count
G - 3	15523
G - 4	7957
G - 5	5736
G - 6	4262				NT	0.5 uM	0.1 uM	1 uM	1.5 uM
G - 8	8532			WT	18891.3	16533.3	18049.7	13909.3	12567.7	Promedio
					1484.16	975.722	1291.12	798.434	1027.94	D.S.
B - 3	19945			shBRCA2	15415.7	10440.3	8811	5636.33	4861.5	Promedio
B - 5	15580				657.603	1675.14	1207.74	474.418	847.821	D.S.
B - 6	16601
B - 8	13807
B - 10	12911				NT	0.5 uM	0.1 uM	1 uM	1.5 uM
C - 3	19535			WT	100	87.5181	95.5447	73.6281	66.5261
C - 5	17530				7.8563	5.16492	6.83448	4.22645	5.44134
C - 6	19079			shBRCA2	100	67.7255	57.1561	36.5624	31.5361
C - 8	14754				4.26581	10.8665	7.83449	3.0775	5.49974
C - 10	13380
	17194
	16490
	18469
	13167
	11412		BRCA2	Exp2
				HCT116			Olaparib
					NT	0.5 uM	0.1 uM	1 uM	1.5 uM
Well	Cell Count			WT	21516	16233	17160	10285	10257	Cell Count
B - 7	21516				21850	17602	21047	15015	11512	Cell Count
B - 8	17160									Cell Count
B - 9	16233			shBRCA2	21866	15641	13501	7027	4697	Cell Count
B - 10	10285				15440	11733	12958	5260	3099	Cell Count
B - 11	10257									Cell Count
C - 7	21850
C - 8	21047
C - 9	17602
C - 10	15015				NT	0.5 uM	0.1 uM	1 uM	1.5 uM
C - 11	11512			WT	21683	16917.5	19103.5	12650	10884.5	Promedio
					236.174	968.029	2748.52	3344.62	887.419	D.S.
				shBRCA2	18653	13687	13229.5	6143.5	3898	Promedio
					4543.87	2763.37	383.959	1249.46	1129.96	D.S.
F - 7	21866
F - 8	13501
F - 9	15641				NT	0.5 uM	0.1 uM	1 uM	1.5 uM
F - 10	7027			WT	114.777	89.5516	101.123	66.9619	57.6164
F - 11	4697				1.25017	5.1242	14.5491	17.7045	4.69749
G - 7	15440			shBRCA2	121	88.7863	85.8185	39.8523	25.286
G - 8	12958				29.4757	17.9257	2.49071	8.10512	7.32992
G - 9	11733
G - 10	5260
G - 11	3099

## Sheet: Figure 1D 
Representative results expressed as RL-3-BL-3 dot plots (log scale, RL-3 780/60 nm filter, and BL-3 695/40 nm filter)
		Data available in Dryad o request to the authors

## Sheet: Figure 1E
			Screening results of PKIS2 library compounds (0.1 μM)
			Screening results of PKIS2 library compounds (0.1 μM) in shBRCA2 HCT116p21-/- cells. Compounds were plotted based on their fold of SL (y axis) and their survival difference (x axis). A compound was considered a "hit" if it exhibited a >5 standard deviations on these two variables. Fold of SL (y-axis): the ratios of the different populations in each individual well. Survival difference (x-axis): c…
codigo	blanco	familia	BRCA	placa	pocillo	conc	SCR count	BRCA count	SCR %	BRCA %	media menos 3sd	media%SCR	media%B	fold controles	fold tratamientos	fold	media count SCR	media count B	% mortalidad SCR	% mortalidad B	survival.diff
AH20685XX	Other inhibitors	Other inhibitors	BRCA2	JP2	E8	0.1	12333	2889	81.02	18.98	9.18537	83.9525	16.0475	4.2315	3.2687	-0.962796	9657.5	1881	0	0	0
AH2635	Other inhibitors	Other inhibitors	BRCA2	JPV	E5	0.1	7786	1934	80.1	19.9	15.0119	82.225	17.775	3.62588	3.02513	-0.600753	7174.5	1557.5	0	0	0
AH5015X	Other inhibitors	Other inhibitors	BRCA2	JP9	F7	0.1	11517	3078	78.91	21.09	12.7758	81.1775	18.8225	3.31279	2.74158	-0.571207	10189.5	2375	0	0	0
Olaparib	(+) Control (Olaparib)	Control	BRCA2	JOQ	B12	0.1	11351	2022	84.88	15.12	9.29991	83.935	16.065	4.22471	4.61376	0.389045	11915.2	2319.5	4.73553	12.826	8.09051
Olaparib	(+) Control (Olaparib)	Control	BRCA2	JOQ	A12	0.1	10553	1633	86.6	13.4	9.29991	83.935	16.065	4.22471	5.46269	1.23797	11915.2	2319.5	11.4328	29.5969	18.1641
Control	(-) Control (Non-Treated)	Control	BRCA2	JOQ	D12	0	13844	3138	81.52	18.48	9.29991	83.935	16.065	4.22471	3.41126	-0.813457	11915.2	2319.5	0	0	0
Control	(-) Control (Non-Treated)	Control	BRCA2	JOQ	C12	0	11913	2485	82.74	17.26	9.29991	83.935	16.065	4.22471	3.79374	-0.430969	11915.2	2319.5	0.0188834	0	-0.0188834
Control	(-) Control (Non-Treated)	Control	BRCA2	JOV	D12	0	12713	3430	78.75	21.25	13.1823	80.96	19.04	3.2521	2.70588	-0.546218	11727.5	2791	0	0	0
Control	(-) Control (Non-Treated)	Control	BRCA2	JOV	C12	0	11521	2647	81.32	18.68	13.1823	80.96	19.04	3.2521	3.35332	0.101218	11727.5	2791	1.76082	5.15944	3.39862
Control	(-) Control (Non-Treated)	Control	BRCA2	JOV	B12	0	12674	3099	80.35	19.65	13.1823	80.96	19.04	3.2521	3.08906	-0.163042	11727.5	2791	0	0	0
Olaparib	(+) Control (Olaparib)	Control	BRCA2	JOV	A12	0.1	10002	1988	83.42	16.58	13.1823	80.96	19.04	3.2521	4.03136	0.779262	11727.5	2791	14.7133	28.771	14.0578
Control	(-) Control (Non-Treated)	Control	BRCA2	JOW	D12	0	7402	1078	87.29	12.71	7.45461	88.27	11.73	6.52515	5.86782	-0.657329	6470.5	868	0	0	0
Olaparib	(+) Control (Olaparib)	Control	BRCA2	JOW	C12	0.1	5855	623	90.38	9.62	7.45461	88.27	11.73	6.52515	8.39501	1.86986	6470.5	868	9.5124	28.2258	18.7134
Control	(-) Control (Non-Treated)	Control	BRCA2	JOW	B12	0	6459	918	87.56	12.44	7.45461	88.27	11.73	6.52515	6.03859	-0.486564	6470.5	868	0.17773	0	-0.17773
Control	(-) Control (Non-Treated)	Control	BRCA2	JOW	A12	0	6166	853	87.85	12.15	7.45461	88.27	11.73	6.52515	6.23045	-0.294697	6470.5	868	4.70597	1.72811	-2.97786
Olaparib	(+) Control (Olaparib)	Control	BRCA2	JP2	A12	0.1	7268	1084	87.02	12.98	9.18537	83.9525	16.0475	4.2315	5.70416	1.47266	9657.5	1881	24.7424	42.3711	17.6287
Control	(-) Control (Non-Treated)	Control	BRCA2	JP2	B12	0	9434	1988	82.59	17.41	9.18537	83.9525	16.0475	4.2315	3.74383	-0.487675	9657.5	1881	2.31426	0	-2.31426
Control	(-) Control (Non-Treated)	Control	BRCA2	JP2	C12	0	11341	2109	84.32	15.68	9.18537	83.9525	16.0475	4.2315	4.37755	0.146051	9657.5	1881	0	0	0
Control	(-) Control (Non-Treated)	Control	BRCA2	JP2	D12	0	10587	2343	81.88	18.12	9.18537	83.9525	16.0475	4.2315	3.51876	-0.712736	9657.5	1881	0	0	0
Olaparib	(+) Control (Olaparib)	Control	BRCA2	JP9	A12	0.1	9837	1864	84.07	15.93	12.7758	81.1775	18.8225	3.31279	4.27746	0.964673	10189.5	2375	3.45944	21.5158	18.0563
Control	(-) Control (Non-Treated)	Control	BRCA2	JP9	B12	0	10538	2731	79.42	20.58	12.7758	81.1775	18.8225	3.31279	2.85909	-0.453704	10189.5	2375	0	0	0
Control	(-) Control (Non-Treated)	Control	BRCA2	JP9	D12	0	9801	2326	80.82	19.18	12.7758	81.1775	18.8225	3.31279	3.21376	-0.0990262	10189.5	2375	3.81275	2.06316	-1.74959
Control	(-) Control (Non-Treated)	Control	BRCA2	JP9	C12	0	10582	2579	80.4	19.6	12.7758	81.1775	18.8225	3.31279	3.10204	-0.21075	10189.5	2375	0	0	0
Olaparib	(+) Control (Olaparib)	Control	BRCA2	JPA	A12	0.1	3669	465	88.75	11.25	8.52902	87.135	12.865	5.77303	6.88889	1.11586	5664.5	851.25	35.2282	45.3744	10.1463
Control	(-) Control (Non-Treated)	Control	BRCA2	JPA	B12	0	6366	871	87.96	12.04	8.52902	87.135	12.865	5.77303	6.30565	0.53262	5664.5	851.25	0	0	0
Control	(-) Control (Non-Treated)	Control	BRCA2	JPA	C12	0	6357	1044	85.89	14.11	8.52902	87.135	12.865	5.77303	5.08717	-0.685855	5664.5	851.25	0	0	0
Control	(-) Control (Non-Treated)	Control	BRCA2	JPA	D12	0	6266	1025	85.94	14.06	8.52902	87.135	12.865	5.77303	5.11238	-0.660652	5664.5	851.25	0	0	0
Control	(-) Control (Non-Treated)	Control	BRCA2	JPG	A12	0	13878	3091	81.78	18.22	16.6645	80.945	19.055	3.24797	3.48847	0.240508	12938	3047	0	0	0
Control	(-) Control (Non-Treated)	Control	BRCA2	JPG	B12	0	11877	2958	80.06	19.94	16.6645	80.945	19.055	3.24797	3.01505	-0.232921	12938	3047	8.20065	2.92091	-5.27974
Control	(-) Control (Non-Treated)	Control	BRCA2	JPG	D12	0	11022	2514	81.43	18.57	16.6645	80.945	19.055	3.24797	3.38503	0.137063	12938	3047	14.8091	17.4926	2.68353
Control	(-) Control (Non-Treated)	Control	BRCA2	JPG	C12	0	14975	3625	80.51	19.49	16.6645	80.945	19.055	3.24797	3.13084	-0.11713	12938	3047	0	0	0
Control	(-) Control (Non-Treated)	Control	BRCA2	JPV	A12	0	5780	1174	83.12	16.88	15.0119	82.225	17.775	3.62588	3.92417	0.298292	7174.5	1557.5	19.4369	24.6228	5.1859
Control	(-) Control (Non-Treated)	Control	BRCA2	JPV	B12	0	8169	1848	81.55	18.45	15.0119	82.225	17.775	3.62588	3.42005	-0.205825	7174.5	1557.5	0	0	0
Control	(-) Control (Non-Treated)	Control	BRCA2	JPV	C12	0	7640	1575	82.91	17.09	15.0119	82.225	17.775	3.62588	3.85138	0.225496	7174.5	1557.5	0	0	0
Control	(-) Control (Non-Treated)	Control	BRCA2	JPV	D12	0	7109	1633	81.32	18.68	15.0119	82.225	17.775	3.62588	3.35332	-0.27256	7174.5	1557.5	0.912956	0	-0.912956
Control	(-) Control (Non-Treated)	Control	BRCA2	todos12	A12	0.1	12719	2598	83.04	16.96	13.0082	83.5075	16.4925	4.06336	3.89623	-0.167136	12059.2	2388	0	0	0
Olaparib	(+) Control (Olaparib)	Control	BRCA2	todos12	B12	0.1	11696	2093	84.82	15.18	13.0082	83.5075	16.4925	4.06336	4.58762	0.524253	12059.2	2388	3.01221	12.3534	9.34122
Control	(-) Control (Non-Treated)	Control	BRCA2	todos12	C12	0.1	11640	2214	84.02	15.98	13.0082	83.5075	16.4925	4.06336	4.25782	0.19446	12059.2	2388	3.47658	7.28643	3.80985
Control	(-) Control (Non-Treated)	Control	BRCA2	todos12	D12	0.1	12182	2647	82.15	17.85	13.0082	83.5075	16.4925	4.06336	3.60224	-0.461121	12059.2	2388	0	0	0
GI230329A	Other inhibitors	Other inhibitors	BRCA2	JP2	F2	0.1	10769	2808	79.32	20.68	9.18537	83.9525	16.0475	4.2315	2.83559	-1.39591	9657.5	1881	0	0	0
GI261520A	Other inhibitors	04:4-anilino_quinazolines_and_related	BRCA2	JOW	A1	0.1	20023	4894	80.36	19.64	7.45461	88.27	11.73	6.52515	3.09165	-3.4335	6470.5	868	0	0	0
GI261590A	Other inhibitors	Other inhibitors	BRCA2	JPA	A10	0.1	6545	1308	83.34	16.66	8.52902	87.135	12.865	5.77303	4.0024	-1.77063	5664.5	851.25	0	0	0
GI261656A	Other inhibitors	Other inhibitors	BRCA2	JP2	F3	0.1	11179	2539	81.49	18.51	9.18537	83.9525	16.0475	4.2315	3.40249	-0.829015	9657.5	1881	0	0	0
GI262866A	Other inhibitors	4-anilinoquin(az)oline	BRCA2	JPA	F10	0.1	6628	1635	80.21	19.79	8.52902	87.135	12.865	5.77303	3.05306	-2.71997	5664.5	851.25	0	0	0
GR105659X	Other inhibitors	02:Oxindoles	BRCA2	JOW	H1	0.1	10930	2033	84.32	15.68	7.45461	88.27	11.73	6.52515	4.37755	-2.1476	6470.5	868	0	0	0
GR269666A	Other inhibitors	04:4-anilino_quinazolines_and_related	BRCA2	JOW	H8	0.1	10578	2480	81.01	18.99	7.45461	88.27	11.73	6.52515	3.26593	-3.25922	6470.5	868	0	0	0
GSK1014915A	Other inhibitors	Other inhibitors	BRCA2	JPV	G1	0.1	10375	2488	80.66	19.34	15.0119	82.225	17.775	3.62588	3.17063	-0.455248	7174.5	1557.5	0	0	0
GSK1024304A	Other inhibitors	Other inhibitors	BRCA2	todos12	F5	0.1	8499	1666	83.61	16.39	13.0082	83.5075	16.4925	4.06336	4.10128	0.0379191	12059.2	2388	29.523	30.2345	0.711526
GSK1030058A	Other inhibitors	05:Benzimidazole_N-thiophenes	BRCA2	JOQ	D6	0.1	14438	3183	81.94	18.06	9.29991	83.935	16.065	4.22471	3.5371	-0.687614	11915.2	2319.5	0	0	0
GSK1030059A	Other inhibitors	05:Benzimidazole_N-thiophenes	BRCA2	JOQ	F7	0.1	9217	2175	80.91	19.09	9.29991	83.935	16.065	4.22471	3.23834	-0.986367	11915.2	2319.5	22.6453	6.22979	-16.4156
GSK1030061A	Other inhibitors	05:Benzimidazole_N-thiophenes	BRCA2	JOW	D7	0.1	9997	2203	81.94	18.06	7.45461	88.27	11.73	6.52515	3.5371	-2.98805	6470.5	868	0	0	0
GSK1030062A	Other inhibitors	05:Benzimidazole_N-thiophenes	BRCA2	JOW	A10	0.1	10262	2285	81.79	18.21	7.45461	88.27	11.73	6.52515	3.49149	-3.03366	6470.5	868	0	0	0
GSK1034945A	Other inhibitors	Other inhibitors	BRCA2	JPA	E9	0.1	9148	2256	80.22	19.78	8.52902	87.135	12.865	5.77303	3.05561	-2.71742	5664.5	851.25	0	0	0
GSK1220512A	Other inhibitors	10:2,4-dianilino_pyrrolopyrimidines	BRCA2	JOV	D10	0.1	11559	3911	74.72	25.28	13.1823	80.96	19.04	3.2521	1.9557	-1.2964	11727.5	2791	1.43679	0	-1.43679
GSK1229496A	Other inhibitors	Other inhibitors	BRCA2	JPV	A8	0.1	6087	1269	82.75	17.25	15.0119	82.225	17.775	3.62588	3.7971	0.171222	7174.5	1557.5	15.1579	18.5233	3.36542
GSK1229782A	Other inhibitors	Other inhibitors	BRCA2	JP9	A11	0.1	10193	2504	80.28	19.72	12.7758	81.1775	18.8225	3.31279	3.07099	-0.241797	10189.5	2375	0	0	0
GSK1269851A	Other inhibitors	7-azaindole	BRCA2	JP2	D7	0.1	10356	2490	80.62	19.38	9.18537	83.9525	16.0475	4.2315	3.15996	-1.07154	9657.5	1881	0	0	0
GSK1321561A	Other inhibitors	7-azaindole	BRCA2	JP2	D10	0.1	12171	3289	78.73	21.27	9.18537	83.9525	16.0475	4.2315	2.70146	-1.53004	9657.5	1881	0	0	0
GSK1322949A	Other inhibitors	7-azaindole	BRCA2	JPV	E3	0.1	9017	1485	85.86	14.14	15.0119	82.225	17.775	3.62588	5.07214	1.44626	7174.5	1557.5	0	4.6549	4.6549
GSK1322949A	Other inhibitors	7-azaindole	BRCA2	JPV	E3	0.1	9017	1485	85.86	14.14	15.0119	82.225	17.775	3.62588	5.07214	1.44626	7174.5	1557.5	0	4.6549	4.6549
GSK1323434A	Other inhibitors	Other inhibitors	BRCA2	JP2	B1	0.1	9907	2077	82.67	17.33	9.18537	83.9525	16.0475	4.2315	3.77034	-0.46116	9657.5	1881	0	0	0
GSK1325775A	Other inhibitors	Other inhibitors	BRCA2	JP2	A11	0.1	8972	1762	83.58	16.42	9.18537	83.9525	16.0475	4.2315	4.09013	-0.141366	9657.5	1881	7.09811	6.32642	-0.771688
GSK1379706A	Other inhibitors	Other inhibitors	BRCA2	JPV	B10	0.1	8200	1997	80.42	19.58	15.0119	82.225	17.775	3.62588	3.10725	-0.518627	7174.5	1557.5	0	0	0
GSK1379708A	Other inhibitors	Other inhibitors	BRCA2	JP2	H5	0.1	9018	2292	79.73	20.27	9.18537	83.9525	16.0475	4.2315	2.9334	-1.2981	9657.5	1881	6.6218	0	-6.6218
GSK1379712A	Other inhibitors	Other inhibitors	BRCA2	JP2	C1	0.1	12309	2948	80.68	19.32	9.18537	83.9525	16.0475	4.2315	3.17598	-1.05552	9657.5	1881	0	0	0
GSK1379713A	Other inhibitors	Other inhibitors	BRCA2	JPV	H3	0.1	7531	1642	82.1	17.9	15.0119	82.225	17.775	3.62588	3.58659	-0.0392869	7174.5	1557.5	0	0	0
GSK1379715A	Other inhibitors	Other inhibitors	BRCA2	JP2	D5	0.1	13692	3796	78.29	21.71	9.18537	83.9525	16.0475	4.2315	2.60617	-1.62533	9657.5	1881	0	0	0
GSK1379717A	Other inhibitors	Other inhibitors	BRCA2	JPA	B2	0.1	7574	1881	80.11	19.89	8.52902	87.135	12.865	5.77303	3.02765	-2.74538	5664.5	851.25	0	0	0
GSK1379720A	Other inhibitors	Other inhibitors	BRCA2	JP2	A6	0.1	8210	1700	82.85	17.15	9.18537	83.9525	16.0475	4.2315	3.8309	-0.400596	9657.5	1881	14.9884	9.62254	-5.36581
GSK1379721A	Other inhibitors	Other inhibitors	BRCA2	JP2	E5	0.1	12824	3423	78.93	21.07	9.18537	83.9525	16.0475	4.2315	2.74608	-1.48542	9657.5	1881	0	0	0
GSK1379722A	Other inhibitors	Other inhibitors	BRCA2	JP2	G5	0.1	13097	2961	81.56	18.44	9.18537	83.9525	16.0475	4.2315	3.42299	-0.808507	9657.5	1881	0	0	0
GSK1379723A	Other inhibitors	Other inhibitors	BRCA2	JP2	F5	0.1	10948	2953	78.76	21.24	9.18537	83.9525	16.0475	4.2315	2.7081	-1.5234	9657.5	1881	0	0	0
GSK1379724A	Other inhibitors	Other inhibitors	BRCA2	JP9	D11	0.1	10884	2797	79.56	20.44	12.7758	81.1775	18.8225	3.31279	2.89237	-0.420423	10189.5	2375	0	0	0
GSK1379725A	Other inhibitors	Other inhibitors	BRCA2	JP2	E1	0.1	11999	3033	79.82	20.18	9.18537	83.9525	16.0475	4.2315	2.9554	-1.2761	9657.5	1881	0	0	0
GSK1379727A	Other inhibitors	Other inhibitors	BRCA2	JP9	B2	0.1	12599	3137	80.06	19.94	12.7758	81.1775	18.8225	3.31279	3.01505	-0.297745	10189.5	2375	0	0	0
GSK1379729A	Other inhibitors	Other inhibitors	BRCA2	JPA	C2	0.1	9021	2346	79.36	20.64	8.52902	87.135	12.865	5.77303	2.84496	-2.92807	5664.5	851.25	0	0	0
GSK1379730A	Other inhibitors	Other inhibitors	BRCA2	JPV	B1	0.1	11716	2977	79.74	20.26	15.0119	82.225	17.775	3.62588	2.93583	-0.690045	7174.5	1557.5	0	0	0
GSK1379732A	Other inhibitors	Other inhibitors	BRCA2	JPA	A3	0.1	5295	1306	80.22	19.78	8.52902	87.135	12.865	5.77303	3.05561	-2.71742	5664.5	851.25	6.52308	0	-6.52308
GSK1379735A	Other inhibitors	Other inhibitors	BRCA2	JPA	D2	0.1	7198	2098	77.43	22.57	8.52902	87.135	12.865	5.77303	2.43066	-3.34237	5664.5	851.25	0	0	0
GSK1379737A	Other inhibitors	Other inhibitors	BRCA2	JPV	A4	0.1	9179	1994	82.15	17.85	15.0119	82.225	17.775	3.62588	3.60224	-0.0236381	7174.5	1557.5	0	0	0
GSK1379741A	Other inhibitors	Other inhibitors	BRCA2	JPA	E2	0.1	7532	1961	79.34	20.66	8.52902	87.135	12.865	5.77303	2.84027	-2.93276	5664.5	851.25	0	0	0
GSK1379742A	Other inhibitors	Other inhibitors	BRCA2	JP2	A5	0.1	10983	2611	80.79	19.21	9.18537	83.9525	16.0475	4.2315	3.20562	-1.02588	9657.5	1881	0	0	0
GSK1379745A	Other inhibitors	Other inhibitors	BRCA2	JPA	F2	0.1	7722	1863	80.56	19.44	8.52902	87.135	12.865	5.77303	3.14403	-2.62899	5664.5	851.25	0	0	0
GSK1379746A	Other inhibitors	Other inhibitors	BRCA2	JPA	H2	0.1	8381	1783	82.46	17.54	8.52902	87.135	12.865	5.77303	3.70125	-2.07177	5664.5	851.25	0	0	0
GSK1379748A	Other inhibitors	Other inhibitors	BRCA2	JP2	B6	0.1	7866	2083	79.06	20.94	9.18537	83.9525	16.0475	4.2315	2.77555	-1.45595	9657.5	1881	18.5503	0	-18.5503
GSK1379751A	Other inhibitors	Other inhibitors	BRCA2	JPA	G2	0.1	7878	1805	81.36	18.64	8.52902	87.135	12.865	5.77303	3.36481	-2.40822	5664.5	851.25	0	0	0
GSK1379753A	Other inhibitors	Other inhibitors	BRCA2	JPV	B4	0.1	9245	2398	79.4	20.6	15.0119	82.225	17.775	3.62588	2.85437	-0.77151	7174.5	1557.5	0	0	0
GSK1379754A	Other inhibitors	Other inhibitors	BRCA2	JPV	A6	0.1	6252	1324	82.52	17.48	15.0119	82.225	17.775	3.62588	3.72082	0.0949448	7174.5	1557.5	12.858	14.992	2.13394
GSK1379762A	Other inhibitors	Other inhibitors	BRCA2	JP2	D1	0.1	14907	3832	79.55	20.45	9.18537	83.9525	16.0475	4.2315	2.88998	-1.34152	9657.5	1881	0	0	0
GSK1379763A	Other inhibitors	Other inhibitors	BRCA2	JPV	A1	0.1	10666	2341	82	18	15.0119	82.225	17.775	3.62588	3.55556	-0.0703235	7174.5	1557.5	0	0	0
GSK1379765A	Other inhibitors	Other inhibitors	BRCA2	JPV	C4	0.1	7786	1919	80.23	19.77	15.0119	82.225	17.775	3.62588	3.05817	-0.56771	7174.5	1557.5	0	0	0
GSK1379766A	Other inhibitors	Other inhibitors	BRCA2	JPV	D4	0.1	10294	2283	81.85	18.15	15.0119	82.225	17.775	3.62588	3.50964	-0.116237	7174.5	1557.5	0	0	0
GSK1379767A	Other inhibitors	Other inhibitors	BRCA2	JPA	D11	0.1	7349	1707	81.15	18.85	8.52902	87.135	12.865	5.77303	3.30504	-2.46799	5664.5	851.25	0	0	0
GSK1379788A	Other inhibitors	Other inhibitors	BRCA2	JP2	G1	0.1	13156	3086	81	19	9.18537	83.9525	16.0475	4.2315	3.26316	-0.968342	9657.5	1881	0	0	0
GSK1379800A	Other inhibitors	Other inhibitors	BRCA2	JPA	C3	0.1	7106	1793	79.85	20.15	8.52902	87.135	12.865	5.77303	2.96278	-2.81025	5664.5	851.25	0	0	0
GSK1379812A	Other inhibitors	Other inhibitors	BRCA2	JP2	F6	0.1	9673	2144	81.86	18.14	9.18537	83.9525	16.0475	4.2315	3.51268	-0.718821	9657.5	1881	0	0	0
GSK1379825A	Other inhibitors	Other inhibitors	BRCA2	JPA	E7	0.1	8288	1758	82.5	17.5	8.52902	87.135	12.865	5.77303	3.71429	-2.05874	5664.5	851.25	0	0	0
GSK1379860A	Other inhibitors	Other inhibitors	BRCA2	JP2	G6	0.1	9075	2251	80.13	19.87	9.18537	83.9525	16.0475	4.2315	3.03271	-1.19879	9657.5	1881	6.03158	0	-6.03158
GSK1379874A	Other inhibitors	Other inhibitors	BRCA2	JP2	A9	0.1	10831	2264	82.71	17.29	9.18537	83.9525	16.0475	4.2315	3.78369	-0.44781	9657.5	1881	0	0	0
GSK1379878A	Other inhibitors	Other inhibitors	BRCA2	JP2	F1	0.1	12134	2859	80.93	19.07	9.18537	83.9525	16.0475	4.2315	3.24384	-0.987662	9657.5	1881	0	0	0
GSK1379879A	Other inhibitors	Other inhibitors	BRCA2	JPV	C1	0.1	10078	2597	79.51	20.49	15.0119	82.225	17.775	3.62588	2.88043	-0.74545	7174.5	1557.5	0	0	0
GSK1379880A	Other inhibitors	Other inhibitors	BRCA2	JP2	A2	0.1	9844	1871	84.03	15.97	9.18537	83.9525	16.0475	4.2315	4.26174	0.0302405	9657.5	1881	0	0.531632	0.531632
GSK1379882A	Other inhibitors	Other inhibitors	BRCA2	JPA	E3	0.1	6218	1592	79.62	20.38	8.52902	87.135	12.865	5.77303	2.90677	-2.86626	5664.5	851.25	0	0	0
GSK1379883A	Other inhibitors	Other inhibitors	BRCA2	JP2	H1	0.1	9952	2041	82.98	17.02	9.18537	83.9525	16.0475	4.2315	3.87544	-0.35606	9657.5	1881	0	0	0
GSK1379896A	Other inhibitors	Other inhibitors	BRCA2	JPV	D1	0.1	10014	2573	79.56	20.44	15.0119	82.225	17.775	3.62588	2.89237	-0.733511	7174.5	1557.5	0	0	0
GSK1379899A	Other inhibitors	Other inhibitors	BRCA2	JPG	A2	0.1	17443	4070	81.08	18.92	16.6645	80.945	19.055	3.24797	3.28541	0.0374458	12938	3047	0	0	0
GSK1379901A	Other inhibitors	Other inhibitors	BRCA2	JP2	E6	0.1	10021	2306	81.29	18.71	9.18537	83.9525	16.0475	4.2315	3.34474	-0.886765	9657.5	1881	0	0	0
GSK1379944A	Other inhibitors	Other inhibitors	BRCA2	JP2	B2	0.1	10022	2435	80.45	19.55	9.18537	83.9525	16.0475	4.2315	3.11509	-1.11641	9657.5	1881	0	0	0
GSK1392956A	Other inhibitors	10:2,4-dianilino_pyrrolopyrimidines	BRCA2	JOV	B2	0.1	13182	3631	78.4	21.6	13.1823	80.96	19.04	3.2521	2.62963	-0.622471	11727.5	2791	0	0	0
GSK1398467A	Other inhibitors	Other inhibitors	BRCA2	JPV	F4	0.1	8261	2384	77.6	22.4	15.0119	82.225	17.775	3.62588	2.46429	-1.16159	7174.5	1557.5	0	0	0
GSK1398471A	Other inhibitors	Other inhibitors	BRCA2	JPV	G4	0.1	7491	2260	76.82	23.18	15.0119	82.225	17.775	3.62588	2.31406	-1.31182	7174.5	1557.5	0	0	0
GSK1398472A	Other inhibitors	Other inhibitors	BRCA2	JPV	E4	0.1	5826	1532	79.18	20.82	15.0119	82.225	17.775	3.62588	2.80307	-0.822805	7174.5	1557.5	18.7957	1.63724	-17.1585
GSK1398473A	Other inhibitors	Other inhibitors	BRCA2	JP9	E11	0.1	10595	2962	78.15	21.85	12.7758	81.1775	18.8225	3.31279	2.57666	-0.736132	10189.5	2375	0	0	0
GSK1398474A	Other inhibitors	Other inhibitors	BRCA2	JPA	B3	0.1	5805	1557	78.85	21.15	8.52902	87.135	12.865	5.77303	2.72813	-3.0449	5664.5	851.25	0	0	0
GSK1398475A	Other inhibitors	Other inhibitors	BRCA2	JP2	C6	0.1	9587	2678	78.17	21.83	9.18537	83.9525	16.0475	4.2315	2.58085	-1.65065	9657.5	1881	0.730003	0	-0.730003
GSK1398477A	Other inhibitors	Other inhibitors	BRCA2	JPV	F2	0.1	9393	2680	77.8	22.2	15.0119	82.225	17.775	3.62588	2.5045	-1.12137	7174.5	1557.5	0	0	0
GSK1487252A	Other inhibitors	7-azaindole	BRCA2	JP9	H9	0.1	12182	1932	86.31	13.69	12.7758	81.1775	18.8225	3.31279	5.3046	1.99181	10189.5	2375	0	18.6526	18.6526
GSK1511931A	Other inhibitors	10:2,4-dianilino_pyrrolopyrimidines	BRCA2	todos12	D6	0.1	10594	2412	81.45	18.55	13.0082	83.5075	16.4925	4.06336	3.39084	-0.672527	12059.2	2388	12.1504	0	-12.1504
GSK1520489A	Other inhibitors	Other inhibitors	BRCA2	JPV	F10	0.1	849	189	81.79	18.21	15.0119	82.225	17.775	3.62588	3.49149	-0.134391	7174.5	1557.5	88.1664	87.8652	-0.301254
GSK1535721A	Other inhibitors	Other inhibitors	BRCA2	JP2	B8	0.1	10157	2322	81.39	18.61	9.18537	83.9525	16.0475	4.2315	3.37346	-0.858045	9657.5	1881	0	0	0
GSK1576028A	Other inhibitors	"2,4-Dianilinopyrimdine"	BRCA2	JPV	G9	0.1	1724	357	82.84	17.16	15.0119	82.225	17.775	3.62588	3.82751	0.201627	7174.5	1557.5	75.9705	77.0787	1.1082
GSK1645895A	Other inhibitors	Other inhibitors	BRCA2	JPG	H1	0.1	14061	2933	82.74	17.26	16.6645	80.945	19.055	3.24797	3.79374	0.545776	12938	3047	0	3.74138	3.74138
GSK1649598A	Other inhibitors	Other inhibitors	BRCA2	JP2	C2	0.1	15691	3870	80.22	19.78	9.18537	83.9525	16.0475	4.2315	3.05561	-1.17589	9657.5	1881	0	0	0
GSK1653537A	Other inhibitors	Other inhibitors	BRCA2	JPA	C9	0.1	8962	2262	79.85	20.15	8.52902	87.135	12.865	5.77303	2.96278	-2.81025	5664.5	851.25	0	0	0
GSK1653539A	Other inhibitors	Other inhibitors	BRCA2	JP2	B9	0.1	8928	1904	82.42	17.58	9.18537	83.9525	16.0475	4.2315	3.68828	-0.543218	9657.5	1881	7.55371	0	-7.55371
GSK1660437A	Other inhibitors	Other inhibitors	BRCA2	todos12	F8	0.1	8799	1631	84.36	15.64	13.0082	83.5075	16.4925	4.06336	4.39386	0.3305	12059.2	2388	27.0353	31.7002	4.6649
GSK1669917A	Other inhibitors	Other inhibitors	BRCA2	JPA	F8	0.1	7299	1945	78.96	21.04	8.52902	87.135	12.865	5.77303	2.75285	-3.02018	5664.5	851.25	0	0	0
GSK1669921A	Other inhibitors	4-Arylquinoline	BRCA2	JP2	C9	0.1	8866	2614	77.23	22.77	9.18537	83.9525	16.0475	4.2315	2.39174	-1.83976	9657.5	1881	8.1957	0	-8.1957
GSK1693850A	Other inhibitors	4-Arylquinoline	BRCA2	JP9	B8	0.1	11403	3809	74.96	25.04	12.7758	81.1775	18.8225	3.31279	1.99361	-1.31918	10189.5	2375	0	0	0
GSK1713088A	Other inhibitors	10:2,4-dianilino_pyrrolopyrimidines	BRCA2	JOQ	A8	0.1	14612	3132	82.35	17.65	9.29991	83.935	16.065	4.22471	3.66572	-0.55899	11915.2	2319.5	0	0	0
GSK1723980B	Other inhibitors	Other inhibitors	BRCA2	JP2	C7	0.1	12039	2612	82.17	17.83	9.18537	83.9525	16.0475	4.2315	3.60852	-0.622975	9657.5	1881	0	0	0
GSK1751853A	Other inhibitors	10:2,4-dianilino_pyrrolopyrimidines	BRCA2	JOW	E9	0.1	13784	3493	79.78	20.22	7.45461	88.27	11.73	6.52515	2.9456	-3.57955	6470.5	868	0	0	0
GSK175726A	Other inhibitors	Other inhibitors	BRCA2	JP9	G3	0.1	10478	2987	77.82	22.18	12.7758	81.1775	18.8225	3.31279	2.50857	-0.804224	10189.5	2375	0	0	0
GSK180736A	ROCK inhibitors	25:Indazole-5-carboxamides	BRCA2	JOW	F2	0.1	10044	2538	79.83	20.17	7.45461	88.27	11.73	6.52515	2.95786	-3.56729	6470.5	868	0	0	0
GSK1819799A	Other inhibitors	10:2,4-dianilino_pyrrolopyrimidines	BRCA2	JOV	B3	0.1	10184	2874	77.99	22.01	13.1823	80.96	19.04	3.2521	2.54339	-0.708711	11727.5	2791	13.1614	0	-13.1614
GSK182497A	Other inhibitors	13:Anilino_thienopyrimidines	BRCA2	JOW	A9	0.1	10099	2288	81.53	18.47	7.45461	88.27	11.73	6.52515	3.41419	-3.11096	6470.5	868	0	0	0
GSK189015A	Other inhibitors	Other inhibitors	BRCA2	todos12	G5	0.1	11440	2230	83.69	16.31	13.0082	83.5075	16.4925	4.06336	4.13121	0.0678457	12059.2	2388	5.13506	6.61642	1.48135
GSK190937A	Other inhibitors	Other inhibitors	BRCA2	JPV	F8	0.1	6591	1718	79.32	20.68	15.0119	82.225	17.775	3.62588	2.83559	-0.790289	7174.5	1557.5	8.13297	0	-8.13297
GSK192082A	Other inhibitors	13:Anilino_thienopyrimidines	BRCA2	JOV	G6	0.1	7464	2028	78.63	21.37	13.1823	80.96	19.04	3.2521	2.67946	-0.572644	11727.5	2791	36.3547	27.3379	-9.01685
GSK198271A	Other inhibitors	Other inhibitors	BRCA2	JPV	F7	0.1	6931	1925	78.26	21.74	15.0119	82.225	17.775	3.62588	2.59982	-1.02606	7174.5	1557.5	3.39396	0	-3.39396
GSK200398A	Other inhibitors	13:Anilino_thienopyrimidines	BRCA2	JOV	H10	0.1	8436	2355	78.18	21.82	13.1823	80.96	19.04	3.2521	2.58295	-0.669149	11727.5	2791	28.0665	15.6216	-12.4449
GSK2008607A	Other inhibitors	Other inhibitors	BRCA2	JPV	C9	0.1	11039	2430	81.96	18.04	15.0119	82.225	17.775	3.62588	3.54324	-0.0826418	7174.5	1557.5	0	0	0
GSK204607A	Other inhibitors	Other inhibitors	BRCA2	JPA	B1	0.1	7315	1892	79.45	20.55	8.52902	87.135	12.865	5.77303	2.86618	-2.90685	5664.5	851.25	0	0	0
GSK204919A	Other inhibitors	Other inhibitors	BRCA2	JPA	G7	0.1	6734	1629	80.52	19.48	8.52902	87.135	12.865	5.77303	3.13347	-2.63956	5664.5	851.25	0	0	0
GSK204925A	Other inhibitors	05:Benzimidazole_N-thiophenes	BRCA2	JOW	B8	0.1	10685	2814	79.15	20.85	7.45461	88.27	11.73	6.52515	2.79616	-3.72899	6470.5	868	0	0	0
GSK205189A	Other inhibitors	Other inhibitors	BRCA2	JPA	B4	0.1	6211	1607	79.44	20.56	8.52902	87.135	12.865	5.77303	2.86381	-2.90921	5664.5	851.25	0	0	0
GSK2110236A	Other inhibitors	10:2,4-dianilino_pyrrolopyrimidines	BRCA2	JOW	B3	0.1	10599	2173	82.99	17.01	7.45461	88.27	11.73	6.52515	3.87889	-2.64625	6470.5	868	0	0	0
GSK2137462A	Other inhibitors	Other inhibitors	BRCA2	JP9	A10	0.1	12712	3357	79.11	20.89	12.7758	81.1775	18.8225	3.31279	2.78698	-0.525811	10189.5	2375	0	0	0
GSK2177277A	Other inhibitors	Other inhibitors	BRCA2	JP9	D10	0.1	13528	3717	78.45	21.55	12.7758	81.1775	18.8225	3.31279	2.64037	-0.672419	10189.5	2375	0	0	0
GSK2181306A	Other inhibitors	Other inhibitors	BRCA2	JP2	H11	0.1	9042	2444	78.72	21.28	9.18537	83.9525	16.0475	4.2315	2.69925	-1.53225	9657.5	1881	6.37329	0	-6.37329
GSK2188764A	Other inhibitors	Other inhibitors	BRCA2	JPG	G1	0.1	10823	2169	83.31	16.69	16.6645	80.945	19.055	3.24797	3.99161	0.743645	12938	3047	16.3472	28.8152	12.468
GSK2192730A	Other inhibitors	Other inhibitors	BRCA2	JPA	H3	0.1	7104	1740	80.33	19.67	8.52902	87.135	12.865	5.77303	3.08388	-2.68914	5664.5	851.25	0	0	0
GSK2193613A	Other inhibitors	Other inhibitors	BRCA2	JPV	G8	0.1	5	2	71.43	28.57	15.0119	82.225	17.775	3.62588	1.50018	-2.1257	7174.5	1557.5	99.9303	99.8716	-0.0587196
GSK2197149A	Other inhibitors	Other inhibitors	BRCA2	todos12	A5	0.1	13210	2523	83.96	16.04	13.0082	83.5075	16.4925	4.06336	4.23441	0.171052	12059.2	2388	0	0	0
GSK2219329A	Other inhibitors	Other inhibitors	BRCA2	JPA	C11	0.1	8825	2088	80.87	19.13	8.52902	87.135	12.865	5.77303	3.22739	-2.54564	5664.5	851.25	0	0	0
GSK2219385A	Other inhibitors	10:2,4-dianilino_pyrrolopyrimidines	BRCA2	todos12	A3	0.1	14248	3223	81.55	18.45	13.0082	83.5075	16.4925	4.06336	3.42005	-0.643308	12059.2	2388	0	0	0
GSK2227430A	Other inhibitors	Other inhibitors	BRCA2	JPV	D7	0.1	7592	2029	78.91	21.09	15.0119	82.225	17.775	3.62588	2.74158	-0.884295	7174.5	1557.5	0	0	0
GSK223675A	Other inhibitors	Other inhibitors	BRCA2	JPV	D3	0.1	9690	2594	78.88	21.12	15.0119	82.225	17.775	3.62588	2.73485	-0.891031	7174.5	1557.5	0	0	0
GSK2250882A	Other inhibitors	Other inhibitors	BRCA2	JPV	B3	0.1	8421	2276	78.72	21.28	15.0119	82.225	17.775	3.62588	2.69925	-0.926631	7174.5	1557.5	0	0	0
GSK2276055A	Other inhibitors	Other inhibitors	BRCA2	JP2	A1	0.1	11330	2466	82.13	17.87	9.18537	83.9525	16.0475	4.2315	3.59597	-0.635529	9657.5	1881	0	0	0
GSK2286062A	Other inhibitors	Other inhibitors	BRCA2	JPA	D9	0.1	7939	1865	80.98	19.02	8.52902	87.135	12.865	5.77303	3.25762	-2.5154	5664.5	851.25	0	0	0
GSK2286295A	Other inhibitors	Other inhibitors	BRCA2	JP2	C11	0.1	9731	2472	79.74	20.26	9.18537	83.9525	16.0475	4.2315	2.93583	-1.29567	9657.5	1881	0	0	0
GSK2288359A	Other inhibitors	Other inhibitors	BRCA2	JPA	G9	0.1	7231	1996	78.37	21.63	8.52902	87.135	12.865	5.77303	2.62321	-3.14982	5664.5	851.25	0	0	0
GSK2291363A	Other inhibitors	Other inhibitors	BRCA2	JP2	D11	0.1	11239	3048	78.67	21.33	9.18537	83.9525	16.0475	4.2315	2.68823	-1.54327	9657.5	1881	0	0	0
GSK2297430A	Other inhibitors	Other inhibitors	BRCA2	JPA	H4	0.1	8534	2161	79.79	20.21	8.52902	87.135	12.865	5.77303	2.94805	-2.82498	5664.5	851.25	0	0	0
GSK2298859A	Other inhibitors	Other inhibitors	BRCA2	JPA	A5	0.1	6751	1808	78.88	21.12	8.52902	87.135	12.865	5.77303	2.73485	-3.03818	5664.5	851.25	0	0	0
GSK2299009A	Other inhibitors	Other inhibitors	BRCA2	JPA	G4	0.1	6245	1544	80.18	19.82	8.52902	87.135	12.865	5.77303	3.04541	-2.72762	5664.5	851.25	0	0	0
GSK2306394A	Other inhibitors	Other inhibitors	BRCA2	JPA	F9	0.1	6592	1664	79.84	20.16	8.52902	87.135	12.865	5.77303	2.96032	-2.81271	5664.5	851.25	0	0	0
GSK2333389A	Other inhibitors	Other inhibitors	BRCA2	JP2	C4	0.1	11747	2958	79.88	20.12	9.18537	83.9525	16.0475	4.2315	2.97018	-1.26132	9657.5	1881	0	0	0
GSK2334006A	Other inhibitors	Other inhibitors	BRCA2	JPA	F4	0.1	9085	1975	82.14	17.86	8.52902	87.135	12.865	5.77303	3.5991	-2.17392	5664.5	851.25	0	0	0
GSK2342769A	Other inhibitors	Other inhibitors	BRCA2	JPV	F1	0.1	10462	2088	83.36	16.64	15.0119	82.225	17.775	3.62588	4.00962	0.383736	7174.5	1557.5	0	0	0
GSK2344444A	Other inhibitors	Other inhibitors	BRCA2	JPV	C2	0.1	8700	2381	78.51	21.49	15.0119	82.225	17.775	3.62588	2.65333	-0.972552	7174.5	1557.5	0	0	0
GSK2347225A	Other inhibitors	Other inhibitors	BRCA2	JP2	D4	0.1	12990	3074	80.86	19.14	9.18537	83.9525	16.0475	4.2315	3.22466	-1.00684	9657.5	1881	0	0	0
GSK2358994A	Other inhibitors	Other inhibitors	BRCA2	JPV	C10	0.1	12083	2442	83.19	16.81	15.0119	82.225	17.775	3.62588	3.94884	0.322961	7174.5	1557.5	0	0	0
GSK2363608B	Other inhibitors	Other inhibitors	BRCA2	JP9	H3	0.1	11928	3105	79.35	20.65	12.7758	81.1775	18.8225	3.31279	2.84262	-0.470176	10189.5	2375	0	0	0
GSK2373690A	Other inhibitors	Other inhibitors	BRCA2	JP9	C6	0.1	12658	2682	82.52	17.48	12.7758	81.1775	18.8225	3.31279	3.72082	0.408033	10189.5	2375	0	0	0
GSK2373693A	Other inhibitors	Other inhibitors	BRCA2	JPA	H1	0.1	9460	2112	81.75	18.25	8.52902	87.135	12.865	5.77303	3.47945	-2.29358	5664.5	851.25	0	0	0
GSK2373723A	Other inhibitors	Other inhibitors	BRCA2	JPG	F2	0.1	14799	3472	81	19	16.6645	80.945	19.055	3.24797	3.26316	0.0151915	12938	3047	0	0	0
GSK237700A	Other inhibitors	05:Benzimidazole_N-thiophenes	BRCA2	JOW	C11	0.1	10167	2665	79.23	20.77	7.45461	88.27	11.73	6.52515	2.81464	-3.71051	6470.5	868	0	0	0
GSK237701A	Other inhibitors	05:Benzimidazole_N-thiophenes	BRCA2	JOV	G11	0.1	2173	496	81.42	18.58	13.1823	80.96	19.04	3.2521	3.38213	0.13003	11727.5	2791	81.4709	82.2286	0.75769
GSK248233B	ROCK inhibitors	Other inhibitors	BRCA2	JOQ	F8	0.1	8504	552	93.9	6.1	9.29991	83.935	16.065	4.22471	14.3934	10.1687	11915.2	2319.5	28.6293	76.2018	47.5725
GSK257997A	Other inhibitors	Other inhibitors	BRCA2	JP9	G6	0.1	10853	2975	78.49	21.51	12.7758	81.1775	18.8225	3.31279	2.649	-0.66379	10189.5	2375	0	0	0
GSK2587663A	Other inhibitors	Other inhibitors	BRCA2	JPV	H8	0.1	7113	1644	81.23	18.77	15.0119	82.225	17.775	3.62588	3.32765	-0.298229	7174.5	1557.5	0.857203	0	-0.857203
GSK2592465A	Other inhibitors	Other inhibitors	BRCA2	JP9	F2	0.1	10846	2937	78.69	21.31	12.7758	81.1775	18.8225	3.31279	2.69263	-0.620158	10189.5	2375	0	0	0
GSK2593067A	Other inhibitors	Other inhibitors	BRCA2	JPA	E5	0.1	8347	2086	80.01	19.99	8.52902	87.135	12.865	5.77303	3.0025	-2.77053	5664.5	851.25	0	0	0
GSK2593074A	Other inhibitors	Other inhibitors	BRCA2	JP9	A4	0.1	11286	2643	81.03	18.97	12.7758	81.1775	18.8225	3.31279	3.27148	-0.0413093	10189.5	2375	0	0	0
GSK260205C	Other inhibitors	Other inhibitors	BRCA2	JP2	D2	0.1	13052	3056	81.03	18.97	9.18537	83.9525	16.0475	4.2315	3.27148	-0.960019	9657.5	1881	0	0	0
GSK2603346A	Other inhibitors	Other inhibitors	BRCA2	JPA	C10	0.1	8078	1922	80.78	19.22	8.52902	87.135	12.865	5.77303	3.20291	-2.57011	5664.5	851.25	0	0	0
GSK2603358A	Other inhibitors	Other inhibitors	BRCA2	todos12	F7	0.1	8280	1723	82.78	17.22	13.0082	83.5075	16.4925	4.06336	3.8072	-0.256161	12059.2	2388	31.339	27.8476	-3.49144
GSK2606414A	Other inhibitors	Other inhibitors	BRCA2	JP2	E11	0.1	10330	2881	78.19	21.81	9.18537	83.9525	16.0475	4.2315	2.58505	-1.64645	9657.5	1881	0	0	0
GSK2606590A	Other inhibitors	Other inhibitors	BRCA2	JP2	H9	0.1	8180	2009	80.28	19.72	9.18537	83.9525	16.0475	4.2315	3.07099	-1.16051	9657.5	1881	15.299	0	-15.299
GSK2608885A	Other inhibitors	Other inhibitors	BRCA2	JPG	D1	0.1	10897	2568	80.93	19.07	16.6645	80.945	19.055	3.24797	3.24384	-0.00412792	12938	3047	15.7752	15.7204	-0.054855
GSK2608899A	Other inhibitors	Other inhibitors	BRCA2	JP2	F11	0.1	9892	2399	80.48	19.52	9.18537	83.9525	16.0475	4.2315	3.12295	-1.10855	9657.5	1881	0	0	0
GSK2634140A	Other inhibitors	Other inhibitors	BRCA2	JP9	H11	0.1	10637	2660	80	20	12.7758	81.1775	18.8225	3.31279	3	-0.312791	10189.5	2375	0	0	0
GSK269962B	ROCK inhibitors	03:Furazan_benzimidazoles	BRCA2	JOW	D2	0.1	9388	646	93.56	6.44	7.45461	88.27	11.73	6.52515	13.528	7.0028	6470.5	868	0	25.576	25.576
GSK270822A	ROCK inhibitors	25:Indazole-5-carboxamides	BRCA2	JOW	D6	0.1	8851	1721	83.72	16.28	7.45461	88.27	11.73	6.52515	4.14251	-2.38264	6470.5	868	0	0	0
GSK292658A	Other inhibitors	Other inhibitors	BRCA2	todos12	C7	0.1	8819	1954	81.86	18.14	13.0082	83.5075	16.4925	4.06336	3.51268	-0.550683	12059.2	2388	26.8694	18.1742	-8.69521
GSK299115A	Other inhibitors	25:Indazole-5-carboxamides	BRCA2	JOW	G4	0.1	8416	1824	82.19	17.81	7.45461	88.27	11.73	6.52515	3.61482	-2.91033	6470.5	868	0	0	0
GSK299495A	Other inhibitors	Other inhibitors	BRCA2	todos12	A7	0.1	19396	4243	82.05	17.95	13.0082	83.5075	16.4925	4.06336	3.57103	-0.492331	12059.2	2388	0	0	0
GSK300014A	Other inhibitors	13:Anilino_thienopyrimidines	BRCA2	JOQ	D11	0.1	14505	3626	80	20	9.29991	83.935	16.065	4.22471	3	-1.22471	11915.2	2319.5	0	0	0
GSK301329A	Other inhibitors	Other inhibitors	BRCA2	JP2	G4	0.1	10394	2329	81.69	18.31	9.18537	83.9525	16.0475	4.2315	3.4615	-0.770004	9657.5	1881	0	0	0
GSK306886A	Other inhibitors	Other inhibitors	BRCA2	todos12	H7	0.1	10737	2127	83.47	16.53	13.0082	83.5075	16.4925	4.06336	4.04961	-0.0137554	12059.2	2388	10.9646	10.9296	-0.034964
GSK312948A	Other inhibitors	05:Benzimidazole_N-thiophenes	BRCA2	JOW	G7	0.1	10508	2413	81.32	18.68	7.45461	88.27	11.73	6.52515	3.35332	-3.17183	6470.5	868	0	0	0
GSK317354A	Other inhibitors	25:Indazole-5-carboxamides	BRCA2	JOQ	H10	0.1	10514	2164	82.93	17.07	9.29991	83.935	16.065	4.22471	3.85823	-0.366481	11915.2	2319.5	11.7601	6.70403	-5.05611
GSK3206866A	Other inhibitors	Other inhibitors	BRCA2	JOQ	H11	0.1	12335	2698	82.05	17.95	9.29991	83.935	16.065	4.22471	3.57103	-0.653681	11915.2	2319.5	0	0	0
GSK323521A	Other inhibitors	Pyrazolopyridizine and related	BRCA2	todos12	E9	0.1	6198	1236	83.37	16.63	13.0082	83.5075	16.4925	4.06336	4.01323	-0.050133	12059.2	2388	48.6038	48.2412	-0.362563
GSK323543A	Other inhibitors	Pyrazolopyridizine and related	BRCA2	JP9	H7	0.1	10563	2878	78.59	21.41	12.7758	81.1775	18.8225	3.31279	2.67071	-0.642076	10189.5	2375	0	0	0
GSK326090A	Other inhibitors	05:Benzimidazole_N-thiophenes	BRCA2	JOQ	A7	0.1	10749	1950	84.64	15.36	9.29991	83.935	16.065	4.22471	4.51042	0.285705	11915.2	2319.5	9.78788	15.9302	6.14228
GSK326180A	Other inhibitors	Other inhibitors	BRCA2	todos12	C8	0.1	16460	3460	82.63	17.37	13.0082	83.5075	16.4925	4.06336	3.75705	-0.30631	12059.2	2388	0	0	0
GSK327238A	Other inhibitors	Other inhibitors	BRCA2	JPV	A9	0.1	6520	1888	77.55	22.45	15.0119	82.225	17.775	3.62588	2.45434	-1.17154	7174.5	1557.5	9.12259	0	-9.12259
GSK336313A	Other inhibitors	Other inhibitors	BRCA2	JPG	H2	0.1	13933	3031	82.13	17.87	16.6645	80.945	19.055	3.24797	3.59597	0.348004	12938	3047	0	0.525107	0.525107
GSK336735A	Other inhibitors	Pyrazolopyridizine and related	BRCA2	JPV	D10	0.1	6883	2135	76.33	23.67	15.0119	82.225	17.775	3.62588	2.22476	-1.40112	7174.5	1557.5	4.063	0	-4.063
GSK346294A	Other inhibitors	Other inhibitors	BRCA2	JPG	A3	0.1	13024	2943	81.57	18.43	16.6645	80.945	19.055	3.24797	3.42594	0.17797	12938	3047	0	3.41319	3.41319
GSK357952A	Other inhibitors	Other inhibitors	BRCA2	JPV	H9	0.1	8650	2123	80.29	19.71	15.0119	82.225	17.775	3.62588	3.07357	-0.552312	7174.5	1557.5	0	0	0
GSK361061A	Other inhibitors	Other inhibitors	BRCA2	JPA	D6	0.1	8672	2173	79.96	20.04	8.52902	87.135	12.865	5.77303	2.99002	-2.78301	5664.5	851.25	0	0	0
GSK361065A	Other inhibitors	Other inhibitors	BRCA2	JPV	A11	0.1	6741	1626	80.57	19.43	15.0119	82.225	17.775	3.62588	3.14668	-0.479199	7174.5	1557.5	6.04223	0	-6.04223
GSK364507A	Other inhibitors	Other inhibitors	BRCA2	JPA	D3	0.1	6706	1860	78.29	21.71	8.52902	87.135	12.865	5.77303	2.60617	-3.16686	5664.5	851.25	0	0	0
GSK398099A	Other inhibitors	Other inhibitors	BRCA2	JPV	C5	0.1	9025	2489	78.38	21.62	15.0119	82.225	17.775	3.62588	2.62535	-1.00053	7174.5	1557.5	0	0	0
GSK429286A	ROCK inhibitors	pyridine-5-carboxamide	BRCA2	JPV	A2	0.1	8304	1553	84.24	15.76	15.0119	82.225	17.775	3.62588	4.34518	0.719299	7174.5	1557.5	0	0.288925	0.288925
GSK448459A	Other inhibitors	Other inhibitors	BRCA2	JP9	F5	0.1	13368	3669	78.46	21.54	12.7758	81.1775	18.8225	3.31279	2.64253	-0.670265	10189.5	2375	0	0	0
GSK466314A	ROCK inhibitors	25:Indazole-5-carboxamides	BRCA2	JOW	G3	0.1	9627	1701	84.98	15.02	7.45461	88.27	11.73	6.52515	4.65779	-1.86736	6470.5	868	0	0	0
GSK479719A	Other inhibitors	benzimidazole-N-thiophene	BRCA2	JPA	A2	0.1	2524	597	80.87	19.13	8.52902	87.135	12.865	5.77303	3.22739	-2.54564	5664.5	851.25	55.4418	29.8678	-25.5739
GSK483724A	Other inhibitors	benzimidazole-N-thiophene	BRCA2	JPA	G1	0.1	7904	1455	84.45	15.55	8.52902	87.135	12.865	5.77303	4.43087	-1.34216	5664.5	851.25	0	0	0
GSK507274A	Other inhibitors	Other inhibitors	BRCA2	JP2	B11	0.1	8252	1998	80.51	19.49	9.18537	83.9525	16.0475	4.2315	3.13084	-1.10066	9657.5	1881	14.5535	0	-14.5535
GSK507358A	Other inhibitors	Other inhibitors	BRCA2	JPV	D2	0.1	8649	2226	79.53	20.47	15.0119	82.225	17.775	3.62588	2.8852	-0.740681	7174.5	1557.5	0	0	0
GSK534911A	ROCK inhibitors	Other inhibitors	BRCA2	JP2	E7	0.1	9019	1277	87.6	12.4	9.18537	83.9525	16.0475	4.2315	6.06452	1.83302	9657.5	1881	6.61144	32.1106	25.4991
GSK534913A	ROCK inhibitors	Other inhibitors	BRCA2	JPA	H9	0.1	6085	1170	83.87	16.13	8.52902	87.135	12.865	5.77303	4.19963	-1.5734	5664.5	851.25	0	0	0
GSK561866B	Other inhibitors	03:Furazan_benzimidazoles	BRCA2	JOQ	H7	0.1	8387	1736	82.85	17.15	9.29991	83.935	16.065	4.22471	3.8309	-0.393808	11915.2	2319.5	29.6112	25.1563	-4.45493
GSK571989A	Other inhibitors	05:Benzimidazole_N-thiophenes	BRCA2	JOQ	G5	0.1	904	180	83.39	16.61	9.29991	83.935	16.065	4.22471	4.02047	-0.204243	11915.2	2319.5	92.4131	92.2397	-0.173377
GSK579289A	Other inhibitors	05:Benzimidazole_N-thiophenes	BRCA2	JOQ	C6	0.1	885	266	76.89	23.11	9.29991	83.935	16.065	4.22471	2.32713	-1.89758	11915.2	2319.5	92.5725	88.532	-4.04053
GSK580432A	Other inhibitors	benzimidazole-N-thiophene	BRCA2	JPA	B5	0.1	1148	246	82.35	17.65	8.52902	87.135	12.865	5.77303	3.66572	-2.10731	5664.5	851.25	79.7334	71.1013	-8.63211
GSK581271A	Other inhibitors	Other inhibitors	BRCA2	JP9	D1	0.1	12485	3155	79.83	20.17	12.7758	81.1775	18.8225	3.31279	2.95786	-0.354932	10189.5	2375	0	0	0
GSK586581A	Other inhibitors	24:Phenyl_carboxamides	BRCA2	JOQ	H3	0.1	8857	1963	81.86	18.14	9.29991	83.935	16.065	4.22471	3.51268	-0.712033	11915.2	2319.5	25.6667	15.3697	-10.297
GSK605714A	Other inhibitors	24:Phenyl_carboxamides	BRCA2	JOV	B7	0.1	10297	2647	79.55	20.45	13.1823	80.96	19.04	3.2521	2.88998	-0.362125	11727.5	2791	12.1978	5.15944	-7.03838
GSK619487A	Other inhibitors	03:Furazan_benzimidazoles	BRCA2	JOW	H6	0.1	9844	2308	81.01	18.99	7.45461	88.27	11.73	6.52515	3.26593	-3.25922	6470.5	868	0	0	0
GSK620503A	Other inhibitors	24:Phenyl_carboxamides	BRCA2	JOQ	E11	0.1	7051	1519	82.28	17.72	9.29991	83.935	16.065	4.22471	3.64334	-0.581371	11915.2	2319.5	40.8237	34.5117	-6.31199
GSK625137A	Other inhibitors	24:Phenyl_carboxamides	BRCA2	JOW	D10	0.1	11182	2704	80.53	19.47	7.45461	88.27	11.73	6.52515	3.13611	-3.38904	6470.5	868	0	0	0
GSK635416A	Other inhibitors	24:Phenyl_carboxamides	BRCA2	todos12	C4	0.1	12061	2481	82.94	17.06	13.0082	83.5075	16.4925	4.06336	3.86166	-0.201697	12059.2	2388	0	0	0
GSK641502A	Other inhibitors	benzimidazole-N-thiophene	BRCA2	JPG	G2	0.1	935	301	75.65	24.35	16.6645	80.945	19.055	3.24797	2.10678	-1.14119	12938	3047	92.7732	90.1214	-2.6518
GSK683281A	Other inhibitors	Other inhibitors	BRCA2	JP9	B3	0.1	12522	3629	77.53	22.47	12.7758	81.1775	18.8225	3.31279	2.45038	-0.862412	10189.5	2375	0	0	0
GSK711701A	Other inhibitors	24:Phenyl_carboxamides	BRCA2	JOW	A8	0.1	10799	2723	79.86	20.14	7.45461	88.27	11.73	6.52515	2.96524	-3.55991	6470.5	868	0	0	0
GSK718429A	Other inhibitors	06:4-pyridyl_ortho-aryl_azoles	BRCA2	JOQ	G1	0.1	15495	3656	80.91	19.09	9.29991	83.935	16.065	4.22471	3.23834	-0.986367	11915.2	2319.5	0	0	0
GSK846226A	Other inhibitors	Other inhibitors	BRCA2	JP2	A4	0.1	10071	2343	81.13	18.87	9.18537	83.9525	16.0475	4.2315	3.29942	-0.932083	9657.5	1881	0	0	0
GSK938890A	Other inhibitors	03:Furazan_benzimidazoles	BRCA2	JOV	C4	0.1	11760	3040	79.46	20.54	13.1823	80.96	19.04	3.2521	2.86855	-0.383552	11727.5	2791	0	0	0
GSK943949A	Other inhibitors	03:Furazan_benzimidazoles	BRCA2	JOV	D9	0.1	18899	4569	80.53	19.47	13.1823	80.96	19.04	3.2521	3.13611	-0.115994	11727.5	2791	0	0	0
GSK949675A	Other inhibitors	03:Furazan_benzimidazoles	BRCA2	JOW	B6	0.1	11559	2755	80.75	19.25	7.45461	88.27	11.73	6.52515	3.19481	-3.33034	6470.5	868	0	0	0
GSK955403A	Other inhibitors	Other inhibitors	BRCA2	JPV	E9	0.1	7793	1864	80.7	19.3	15.0119	82.225	17.775	3.62588	3.18135	-0.444532	7174.5	1557.5	0	0	0
GSK969786A	Other inhibitors	13:Anilino_thienopyrimidines	BRCA2	JOQ	C2	0.1	12871	3051	80.84	19.16	9.29991	83.935	16.065	4.22471	3.21921	-1.00551	11915.2	2319.5	0	0	0
GSK977617A	Other inhibitors	Other inhibitors	BRCA2	todos12	C5	0.1	12116	2436	83.26	16.74	13.0082	83.5075	16.4925	4.06336	3.97372	-0.0896465	12059.2	2388	0	0	0
GSK978744A	Other inhibitors	05:Benzimidazole_N-thiophenes	BRCA2	JOQ	D7	0.1	11153	2151	83.83	16.17	9.29991	83.935	16.065	4.22471	4.18429	-0.0404202	11915.2	2319.5	6.39726	7.2645	0.867233
GSK980961A	Other inhibitors	30:6-phenyl_isoquinolines	BRCA2	todos12	G6	0.1	9252	1745	84.13	15.87	13.0082	83.5075	16.4925	4.06336	4.3012	0.237835	12059.2	2388	23.2788	26.9263	3.64749
GSK993273A	Other inhibitors	Other inhibitors	BRCA2	JPA	G6	0.1	7144	1703	80.75	19.25	8.52902	87.135	12.865	5.77303	3.19481	-2.57822	5664.5	851.25	0	0	0
GW272142A	Other inhibitors	Other inhibitors	BRCA2	JPA	D5	0.1	6297	1685	78.89	21.11	8.52902	87.135	12.865	5.77303	2.73709	-3.03594	5664.5	851.25	0	0	0
GW273749A	Other inhibitors	Other inhibitors	BRCA2	JPA	B10	0.1	6776	1970	77.48	22.52	8.52902	87.135	12.865	5.77303	2.4405	-3.33253	5664.5	851.25	0	0	0
GW275568A	Other inhibitors	Other inhibitors	BRCA2	JPV	G5	0.1	7049	1846	79.25	20.75	15.0119	82.225	17.775	3.62588	2.81928	-0.806602	7174.5	1557.5	1.74925	0	-1.74925
GW275616X	Other inhibitors	02:Oxindoles	BRCA2	JOQ	G10	0.1	13501	3362	80.06	19.94	9.29991	83.935	16.065	4.22471	3.01505	-1.20967	11915.2	2319.5	0	0	0
GW275944X	Other inhibitors	02:Oxindoles	BRCA2	JOQ	B3	0.1	12414	3060	80.22	19.78	9.29991	83.935	16.065	4.22471	3.05561	-1.1691	11915.2	2319.5	0	0	0
GW276655X	Other inhibitors	02:Oxindoles	BRCA2	JOW	D3	0.1	9378	2355	79.93	20.07	7.45461	88.27	11.73	6.52515	2.98256	-3.54259	6470.5	868	0	0	0
GW281179X	Other inhibitors	Other inhibitors	BRCA2	JPA	H8	0.1	6590	1643	80.04	19.96	8.52902	87.135	12.865	5.77303	3.01002	-2.76301	5664.5	851.25	0	0	0
GW282450A	Other inhibitors	Other inhibitors	BRCA2	JP2	H6	0.1	7156	1778	80.1	19.9	9.18537	83.9525	16.0475	4.2315	3.02513	-1.20637	9657.5	1881	25.9021	5.47581	-20.4263
GW282536X	Other inhibitors	02:Oxindoles	BRCA2	JOW	E3	0.1	10716	3001	78.12	21.88	7.45461	88.27	11.73	6.52515	2.57038	-3.95477	6470.5	868	0	0	0
GW282974X	Other inhibitors	04:4-anilino_quinazolines_and_related	BRCA2	JOW	G2	0.1	8288	2098	79.8	20.2	7.45461	88.27	11.73	6.52515	2.9505	-3.57465	6470.5	868	0	0	0
GW284372X	Other inhibitors	04:4-anilino_quinazolines_and_related	BRCA2	JOV	H6	0.1	7129	1641	81.29	18.71	13.1823	80.96	19.04	3.2521	3.34474	0.0926346	11727.5	2791	39.2113	41.2039	1.99261
GW284408X	Other inhibitors	02:Oxindoles	BRCA2	JOV	H8	0.1	7494	1937	79.46	20.54	13.1823	80.96	19.04	3.2521	2.86855	-0.383552	11727.5	2791	36.0989	30.5984	-5.50056
GW284543A	Other inhibitors	Other inhibitors	BRCA2	JPG	B2	0.1	16157	3944	80.38	19.62	16.6645	80.945	19.055	3.24797	3.09684	-0.151126	12938	3047	0	0	0
GW290597X	Other inhibitors	02:Oxindoles	BRCA2	JOW	H10	0.1	10909	2376	82.12	17.88	7.45461	88.27	11.73	6.52515	3.59284	-2.93231	6470.5	868	0	0	0
GW296115X	Other inhibitors	17:Maleimide	BRCA2	JOQ	B9	0.1	16186	3906	80.56	19.44	9.29991	83.935	16.065	4.22471	3.14403	-1.08068	11915.2	2319.5	0	0	0
GW297361X	Other inhibitors	02:Oxindoles	BRCA2	JOV	G1	0.1	8791	2221	79.83	20.17	13.1823	80.96	19.04	3.2521	2.95786	-0.294243	11727.5	2791	25.0394	20.4228	-4.61665
GW300653X	Other inhibitors	02:Oxindoles	BRCA2	JOQ	A3	0.1	13751	3045	81.87	18.13	9.29991	83.935	16.065	4.22471	3.51572	-0.708992	11915.2	2319.5	0	0	0
GW300657X	Other inhibitors	02:Oxindoles	BRCA2	JOQ	C3	0.1	14187	3659	79.5	20.5	9.29991	83.935	16.065	4.22471	2.87805	-1.34666	11915.2	2319.5	0	0	0
GW300660X	Other inhibitors	02:Oxindoles	BRCA2	JOV	E2	0.1	10987	2821	79.57	20.43	13.1823	80.96	19.04	3.2521	2.89476	-0.357338	11727.5	2791	6.31422	0	-6.31422
GW301784X	Other inhibitors	02:Oxindoles	BRCA2	todos12	C6	0.1	11999	2257	84.17	15.83	13.0082	83.5075	16.4925	4.06336	4.31712	0.253757	12059.2	2388	0.499616	5.48576	4.98615
GW301789X	Other inhibitors	02:Oxindoles	BRCA2	JOV	C10	0.1	14562	3713	79.68	20.32	13.1823	80.96	19.04	3.2521	2.92126	-0.330841	11727.5	2791	0	0	0
GW301888X	Other inhibitors	04:4-anilino_quinazolines_and_related	BRCA2	JOV	G10	0.1	8080	2310	77.77	22.23	13.1823	80.96	19.04	3.2521	2.49843	-0.753675	11727.5	2791	31.1021	17.234	-13.8681
GW305074X	Other inhibitors	02:Oxindoles	BRCA2	JOV	G3	0.1	7099	1737	80.34	19.66	13.1823	80.96	19.04	3.2521	3.08647	-0.165631	11727.5	2791	39.4671	37.7642	-1.70282
GW305178X	Other inhibitors	02:Oxindoles	BRCA2	JOQ	C9	0.1	12230	3740	76.58	23.42	9.29991	83.935	16.065	4.22471	2.26985	-1.95486	11915.2	2319.5	0	0	0
GW320571X	Other inhibitors	Other inhibitors	BRCA2	JPV	C6	0.1	8687	2399	78.36	21.64	15.0119	82.225	17.775	3.62588	2.62107	-1.00481	7174.5	1557.5	0	0	0
GW335962X	Other inhibitors	02:Oxindoles	BRCA2	JOV	C3	0.1	12160	3223	79.05	20.95	13.1823	80.96	19.04	3.2521	2.77327	-0.478831	11727.5	2791	0	0	0
GW345098X	Other inhibitors	Other inhibitors	BRCA2	JP9	F3	0.1	11269	3236	77.69	22.31	12.7758	81.1775	18.8225	3.31279	2.48229	-0.830496	10189.5	2375	0	0	0
GW405841X	Other inhibitors	02:Oxindoles	BRCA2	JOQ	A6	0.1	11226	2240	83.37	16.63	9.29991	83.935	16.065	4.22471	4.01323	-0.211483	11915.2	2319.5	5.7846	3.42746	-2.35714
GW406108X	Other inhibitors	02:Oxindoles	BRCA2	JOQ	H2	0.1	12549	3222	79.57	20.43	9.29991	83.935	16.065	4.22471	2.89476	-1.32995	11915.2	2319.5	0	0	0
GW406731X	Other inhibitors	12:3-vinyl_pyridines	BRCA2	todos12	F6	0.1	8047	1753	82.11	17.89	13.0082	83.5075	16.4925	4.06336	3.58971	-0.473647	12059.2	2388	33.2711	26.5913	-6.67985
GW407034X	Other inhibitors	Other inhibitors	BRCA2	JP2	C10	0.1	10183	2812	78.36	21.64	9.18537	83.9525	16.0475	4.2315	2.62107	-1.61043	9657.5	1881	0	0	0
GW407323A	Other inhibitors	02:Oxindoles	BRCA2	JOQ	D1	0.1	17514	4437	79.79	20.21	9.29991	83.935	16.065	4.22471	2.94805	-1.27667	11915.2	2319.5	0	0	0
GW410563A	Other inhibitors	04:4-anilino_quinazolines_and_related	BRCA2	JOQ	A5	0.1	18865	4119	82.08	17.92	9.29991	83.935	16.065	4.22471	3.58036	-0.644355	11915.2	2319.5	0	0	0
GW412617A	Other inhibitors	Other inhibitors	BRCA2	JPV	D11	0.1	9417	2312	80.29	19.71	15.0119	82.225	17.775	3.62588	3.07357	-0.552312	7174.5	1557.5	0	0	0
GW416469X	Other inhibitors	02:Oxindoles	BRCA2	JOW	G5	0.1	10906	2671	80.33	19.67	7.45461	88.27	11.73	6.52515	3.08388	-3.44127	6470.5	868	0	0	0
GW416981X	Other inhibitors	02:Oxindoles	BRCA2	JOQ	D9	0.1	8050	1567	83.71	16.29	9.29991	83.935	16.065	4.22471	4.13874	-0.0859767	11915.2	2319.5	32.4395	32.4423	0.00281593
GW424170A	Other inhibitors	Other inhibitors	BRCA2	JP9	E8	0.1	14107	3947	78.14	21.86	12.7758	81.1775	18.8225	3.31279	2.57457	-0.738225	10189.5	2375	0	0	0
GW427984X	Other inhibitors	12:3-vinyl_pyridines	BRCA2	JOQ	E6	0.1	15315	3469	81.53	18.47	9.29991	83.935	16.065	4.22471	3.41419	-0.810527	11915.2	2319.5	0	0	0
GW429374A	Other inhibitors	02:Oxindoles	BRCA2	JOV	C6	0.1	14905	4024	78.74	21.26	13.1823	80.96	19.04	3.2521	2.70367	-0.548432	11727.5	2791	0	0	0
GW432441X	Other inhibitors	12:3-vinyl_pyridines	BRCA2	JOW	E6	0.1	13453	2908	82.23	17.77	7.45461	88.27	11.73	6.52515	3.62746	-2.89769	6470.5	868	0	0	0
GW434756X	Other inhibitors	06:4-pyridyl_ortho-aryl_azoles	BRCA2	JOQ	C10	0.1	10636	2045	83.87	16.13	9.29991	83.935	16.065	4.22471	4.19963	-0.0250841	11915.2	2319.5	10.7362	11.8344	1.09821
GW435821X	Other inhibitors	Other inhibitors	BRCA2	JOV	H5	0.1	7668	2132	78.24	21.76	13.1823	80.96	19.04	3.2521	2.59559	-0.656513	11727.5	2791	34.6152	23.6116	-11.0036
GW435821X	Other inhibitors	12:3-vinyl_pyridines	BRCA2	JOV	H5	0.1	7668	2132	78.24	21.76	13.1823	80.96	19.04	3.2521	2.59559	-0.656513	11727.5	2791	34.6152	23.6116	-11.0036
GW439255X	Other inhibitors	12:3-vinyl_pyridines	BRCA2	JOQ	E4	0.1	15359	3323	82.21	17.79	9.29991	83.935	16.065	4.22471	3.62114	-0.603577	11915.2	2319.5	0	0	0
GW440132A	Other inhibitors	Other inhibitors	BRCA2	JPA	F11	0.1	6264	1485	80.84	19.16	8.52902	87.135	12.865	5.77303	3.21921	-2.55382	5664.5	851.25	0	0	0
GW440135A	Other inhibitors	Other inhibitors	BRCA2	JPA	B7	0.1	5139	1470	77.76	22.24	8.52902	87.135	12.865	5.77303	2.4964	-3.27662	5664.5	851.25	9.27708	0	-9.27708
GW440137A	Other inhibitors	Other inhibitors	BRCA2	JP9	B5	0.1	13063	3614	78.33	21.67	12.7758	81.1775	18.8225	3.31279	2.61467	-0.698116	10189.5	2375	0	0	0
GW440138A	Other inhibitors	Other inhibitors	BRCA2	todos12	G9	0.1	9846	2167	81.96	18.04	13.0082	83.5075	16.4925	4.06336	3.54324	-0.520125	12059.2	2388	18.3531	9.25461	-9.09853
GW440148A	Other inhibitors	Other inhibitors	BRCA2	JP9	F1	0.1	14114	3198	81.53	18.47	12.7758	81.1775	18.8225	3.31279	3.41419	0.101395	10189.5	2375	0	0	0
GW441756X	Other inhibitors	02:Oxindoles	BRCA2	JOV	F8	0.1	7182	2092	77.44	22.56	13.1823	80.96	19.04	3.2521	2.43262	-0.819477	11727.5	2791	38.7593	25.0448	-13.7145
GW441806A	Other inhibitors	12:3-vinyl_pyridines	BRCA2	JOQ	C1	0.1	19906	5458	78.48	21.52	9.29991	83.935	16.065	4.22471	2.64684	-1.57787	11915.2	2319.5	0	0	0
GW442130X	Other inhibitors	02:Oxindoles	BRCA2	JOV	C2	0.1	9862	2394	80.47	19.53	13.1823	80.96	19.04	3.2521	3.12033	-0.131773	11727.5	2791	15.9071	14.2243	-1.68276
GW445012X	Other inhibitors	12:3-vinyl_pyridines	BRCA2	JOW	E4	0.1	11670	3053	79.26	20.74	7.45461	88.27	11.73	6.52515	2.8216	-3.70355	6470.5	868	0	0	0
GW445015X	Other inhibitors	12:3-vinyl_pyridines	BRCA2	JOW	F5	0.1	12552	3260	79.38	20.62	7.45461	88.27	11.73	6.52515	2.84966	-3.67549	6470.5	868	0	0	0
GW445017X	Other inhibitors	12:3-vinyl_pyridines	BRCA2	JOQ	F3	0.1	11050	2422	82.02	17.98	9.29991	83.935	16.065	4.22471	3.56174	-0.662977	11915.2	2319.5	7.2617	0	-7.2617
GW450241X	Other inhibitors	12:3-vinyl_pyridines	BRCA2	JOW	C1	0.1	10862	2590	80.75	19.25	7.45461	88.27	11.73	6.52515	3.19481	-3.33034	6470.5	868	0	0	0
GW458787B	Other inhibitors	Other inhibitors	BRCA2	JOW	F10	0.1	12394	3109	79.95	20.05	7.45461	88.27	11.73	6.52515	2.98753	-3.53762	6470.5	868	0	0	0
GW459057A	Other inhibitors	12:3-vinyl_pyridines	BRCA2	JOV	A10	0.1	12545	3098	80.2	19.8	13.1823	80.96	19.04	3.2521	3.05051	-0.201596	11727.5	2791	0	0	0
GW461104B	Other inhibitors	Other inhibitors	BRCA2	JOW	B2	0.1	11368	2855	79.93	20.07	7.45461	88.27	11.73	6.52515	2.98256	-3.54259	6470.5	868	0	0	0
GW461487A	Other inhibitors	Other inhibitors	BRCA2	JP9	E2	0.1	12064	2950	80.35	19.65	12.7758	81.1775	18.8225	3.31279	3.08906	-0.223732	10189.5	2375	0	0	0
GW466413A	Other inhibitors	Other inhibitors	BRCA2	JPA	A6	0.1	6166	1420	81.28	18.72	8.52902	87.135	12.865	5.77303	3.34188	-2.43115	5664.5	851.25	0	0	0
GW468513X	Other inhibitors	Other inhibitors	BRCA2	JPA	A4	0.1	7843	1830	81.08	18.92	8.52902	87.135	12.865	5.77303	3.28541	-2.48762	5664.5	851.25	0	0	0
GW482059X	Other inhibitors	Other inhibitors	BRCA2	JPV	H5	0.1	6817	1670	80.32	19.68	15.0119	82.225	17.775	3.62588	3.0813	-0.544578	7174.5	1557.5	4.98293	0	-4.98293
GW493036X	Other inhibitors	Other inhibitors	BRCA2	JP2	C3	0.1	12234	1953	86.23	13.77	9.18537	83.9525	16.0475	4.2315	5.26216	1.03066	9657.5	1881	0	0	0
GW494610A	Other inhibitors	Other inhibitors	BRCA2	JPV	B5	0.1	9422	2362	79.96	20.04	15.0119	82.225	17.775	3.62588	2.99002	-0.635859	7174.5	1557.5	0	0	0
GW494702A	Other inhibitors	Other inhibitors	BRCA2	JP9	E6	0.1	12036	2794	81.16	18.84	12.7758	81.1775	18.8225	3.31279	3.30786	-0.00493492	10189.5	2375	0	0	0
GW497681X	Other inhibitors	Other inhibitors	BRCA2	JPV	A3	0.1	6310	1419	81.64	18.36	15.0119	82.225	17.775	3.62588	3.44662	-0.179256	7174.5	1557.5	12.0496	8.89246	-3.15716
GW513184X	Other inhibitors	09:4-hydrazinly_pyrazolopyrimidines	BRCA2	JOQ	F5	0.1	10359	2467	80.77	19.23	9.29991	83.935	16.065	4.22471	3.20021	-1.0245	11915.2	2319.5	13.061	0	-13.061
GW514786X	Other inhibitors	Other inhibitors	BRCA2	JPA	A8	0.1	6568	1684	79.59	20.41	8.52902	87.135	12.865	5.77303	2.89956	-2.87347	5664.5	851.25	0	0	0
GW525701A	Other inhibitors	Other inhibitors	BRCA2	JPV	B11	0.1	8653	2133	80.22	19.78	15.0119	82.225	17.775	3.62588	3.05561	-0.570267	7174.5	1557.5	0	0	0
GW548057X	Other inhibitors	Other inhibitors	BRCA2	JP9	F8	0.1	13615	3554	79.3	20.7	12.7758	81.1775	18.8225	3.31279	2.83092	-0.481873	10189.5	2375	0	0	0
GW549034X	Other inhibitors	03:Furazan_benzimidazoles	BRCA2	JOV	A1	0.1	14235	3212	81.59	18.41	13.1823	80.96	19.04	3.2521	3.43183	0.17973	11727.5	2791	0	0	0
GW549390X	Other inhibitors	08:2-amino_oxazoles	BRCA2	todos12	B4	0.1	10830	2859	79.11	20.89	13.0082	83.5075	16.4925	4.06336	2.78698	-1.27638	12059.2	2388	10.1934	0	-10.1934
GW551191X	Other inhibitors	Other inhibitors	BRCA2	todos12	H8	0.1	10860	1942	84.83	15.17	13.0082	83.5075	16.4925	4.06336	4.59196	0.528596	12059.2	2388	9.94465	18.6767	8.73207
GW552771X	Other inhibitors	Other inhibitors	BRCA2	JP9	G4	0.1	10322	2607	79.84	20.16	12.7758	81.1775	18.8225	3.31279	2.96032	-0.352473	10189.5	2375	0	0	0
GW557777X	Other inhibitors	Other inhibitors	BRCA2	JP9	D3	0.1	11853	3527	77.07	22.93	12.7758	81.1775	18.8225	3.31279	2.3611	-0.951692	10189.5	2375	0	0	0
GW559768X	Other inhibitors	29:4-anilino_quinolines	BRCA2	JOV	A7	0.1	11742	3290	78.11	21.89	13.1823	80.96	19.04	3.2521	2.5683	-0.683805	11727.5	2791	0	0	0
GW560109X	Other inhibitors	Other inhibitors	BRCA2	JPV	H1	0.1	9881	2140	82.2	17.8	15.0119	82.225	17.775	3.62588	3.61798	-0.00790152	7174.5	1557.5	0	0	0
GW560116X	Other inhibitors	Other inhibitors	BRCA2	JPA	F7	0.1	5702	1628	77.79	22.21	8.52902	87.135	12.865	5.77303	2.50248	-3.27055	5664.5	851.25	0	0	0
GW560459X	Other inhibitors	Other inhibitors	BRCA2	JPA	H6	0.1	6814	1470	82.25	17.75	8.52902	87.135	12.865	5.77303	3.6338	-2.13922	5664.5	851.25	0	0	0
GW561436X	Other inhibitors	01:4-pyrimidinyl_ortho-aryl_azoles	BRCA2	JOV	A11	0.1	10362	3010	77.49	22.51	13.1823	80.96	19.04	3.2521	2.44247	-0.809631	11727.5	2791	11.6436	0	-11.6436
GW566221B	Other inhibitors	Other inhibitors	BRCA2	JOW	F7	0.1	8785	2306	79.21	20.79	7.45461	88.27	11.73	6.52515	2.81	-3.71514	6470.5	868	0	0	0
GW567142A	Other inhibitors	Other inhibitors	BRCA2	JP2	B7	0.1	6324	1587	79.94	20.06	9.18537	83.9525	16.0475	4.2315	2.98504	-1.24646	9657.5	1881	34.5172	15.63	-18.8872
GW567143X	Other inhibitors	Other inhibitors	BRCA2	JP2	B4	0.1	10647	2769	79.36	20.64	9.18537	83.9525	16.0475	4.2315	2.84496	-1.38654	9657.5	1881	0	0	0
GW567148X	Other inhibitors	Other inhibitors	BRCA2	JP9	B10	0.1	12019	3446	77.72	22.28	12.7758	81.1775	18.8225	3.31279	2.48833	-0.82446	10189.5	2375	0	0	0
GW567808A	Other inhibitors	04:4-anilino_quinazolines_and_related	BRCA2	JOW	D5	0.1	13855	3048	81.97	18.03	7.45461	88.27	11.73	6.52515	3.54631	-2.97884	6470.5	868	0	0	0
GW568326X	Other inhibitors	01:4-pyrimidinyl_ortho-aryl_azoles	BRCA2	JOQ	E3	0.1	16945	4231	80.02	19.98	9.29991	83.935	16.065	4.22471	3.00501	-1.21971	11915.2	2319.5	0	0	0
GW568377B	Other inhibitors	Other inhibitors	BRCA2	JOQ	F10	0.1	11193	2556	81.41	18.59	9.29991	83.935	16.065	4.22471	3.37924	-0.845476	11915.2	2319.5	6.06156	0	-6.06156
GW569293E	Other inhibitors	01:4-pyrimidinyl_ortho-aryl_azoles	BRCA2	JOV	H11	0.1	8863	1954	81.94	18.06	13.1823	80.96	19.04	3.2521	3.5371	0.284998	11727.5	2791	24.4255	29.9893	5.56376
GW569530A	Other inhibitors	04:4-anilino_quinazolines_and_related	BRCA2	JOW	A5	0.1	10754	2237	82.78	17.22	7.45461	88.27	11.73	6.52515	3.8072	-2.71795	6470.5	868	0	0	0
GW569716A	Other inhibitors	Other inhibitors	BRCA2	JPV	A10	0.1	5689	1364	80.66	19.34	15.0119	82.225	17.775	3.62588	3.17063	-0.455248	7174.5	1557.5	20.7053	12.4238	-8.28152
GW572399X	Other inhibitors	08:2-amino_oxazoles	BRCA2	JOW	E2	0.1	11156	2538	81.47	18.53	7.45461	88.27	11.73	6.52515	3.39665	-3.1285	6470.5	868	0	0	0
GW572401X	Other inhibitors	08:2-amino_oxazoles	BRCA2	JOW	C3	0.1	11005	2660	80.53	19.47	7.45461	88.27	11.73	6.52515	3.13611	-3.38904	6470.5	868	0	0	0
GW574783B	Other inhibitors	04:4-anilino_quinazolines_and_related	BRCA2	JPG	A1	0.1	15788	4065	79.52	20.48	16.6645	80.945	19.055	3.24797	2.88281	-0.365154	12938	3047	0	0	0
GW574783B	Other inhibitors	04:4-anilino_quinazolines_and_related	BRCA2	todos12	E6	0.1	6933	1437	82.83	17.17	13.0082	83.5075	16.4925	4.06336	3.82411	-0.23925	12059.2	2388	42.5089	39.8241	-2.68474
GW575533A	Other inhibitors	08:2-amino_oxazoles	BRCA2	JOQ	F6	0.1	12172	2918	80.66	19.34	9.29991	83.935	16.065	4.22471	3.17063	-1.05408	11915.2	2319.5	0	0	0
GW575808A	Other inhibitors	16:2,4-diamino_pyrimidines	BRCA2	JOV	D1	0.1	21156	4561	82.26	17.74	13.1823	80.96	19.04	3.2521	3.63698	0.384878	11727.5	2791	0	0	0
GW576484X	Other inhibitors	04:4-anilino_quinazolines_and_related	BRCA2	JOW	E7	0.1	11102	2561	81.26	18.74	7.45461	88.27	11.73	6.52515	3.33618	-3.18897	6470.5	868	0	0	0
GW576604X	Other inhibitors	Other inhibitors	BRCA2	JP2	F4	0.1	10053	2526	79.92	20.08	9.18537	83.9525	16.0475	4.2315	2.98008	-1.25142	9657.5	1881	0	0	0
GW576609B	Other inhibitors	Other inhibitors	BRCA2	JOV	H9	0.1	6391	1617	79.81	20.19	13.1823	80.96	19.04	3.2521	2.95295	-0.299154	11727.5	2791	45.5042	42.0638	-3.44038
GW576924A	Other inhibitors	04:4-anilino_quinazolines_and_related	BRCA2	JOV	B6	0.1	11523	2723	80.89	19.11	13.1823	80.96	19.04	3.2521	3.23286	-0.0192385	11727.5	2791	1.74376	2.4364	0.692638
GW577382X	Other inhibitors	Other inhibitors	BRCA2	JPA	C8	0.1	8327	2315	78.25	21.75	8.52902	87.135	12.865	5.77303	2.5977	-3.17533	5664.5	851.25	0	0	0
GW577921A	Other inhibitors	08:2-amino_oxazoles	BRCA2	JOW	D9	0.1	11025	2709	80.28	19.72	7.45461	88.27	11.73	6.52515	3.07099	-3.45416	6470.5	868	0	0	0
GW578342X	Other inhibitors	Other inhibitors	BRCA2	JP9	B4	0.1	10437	2654	79.73	20.27	12.7758	81.1775	18.8225	3.31279	2.9334	-0.379391	10189.5	2375	0	0	0
GW578748X	Other inhibitors	09:4-hydrazinly_pyrazolopyrimidines	BRCA2	JOQ	E2	0.1	16527	3927	80.8	19.2	9.29991	83.935	16.065	4.22471	3.20833	-1.01638	11915.2	2319.5	0	0	0
GW580496A	Other inhibitors	04:4-anilino_quinazolines_and_related	BRCA2	JOW	F8	0.1	12499	3314	79.04	20.96	7.45461	88.27	11.73	6.52515	2.77099	-3.75416	6470.5	868	0	0	0
GW580509X	Other inhibitors	08:2-amino_oxazoles	BRCA2	JOQ	G7	0.1	12525	2903	81.18	18.82	9.29991	83.935	16.065	4.22471	3.3135	-0.911216	11915.2	2319.5	0	0	0
GW582764A	Other inhibitors	Other inhibitors	BRCA2	todos12	C9	0.1	10073	2279	81.55	18.45	13.0082	83.5075	16.4925	4.06336	3.42005	-0.643308	12059.2	2388	16.4708	4.56449	-11.9063
GW582868A	Other inhibitors	Other inhibitors	BRCA2	JPA	B8	0.1	7720	1817	80.95	19.05	8.52902	87.135	12.865	5.77303	3.24934	-2.52368	5664.5	851.25	0	0	0
GW583340C	Other inhibitors	Other inhibitors	BRCA2	JP9	G2	0.1	10345	2853	78.38	21.62	12.7758	81.1775	18.8225	3.31279	2.62535	-0.687444	10189.5	2375	0	0	0
GW583373A	Other inhibitors	04:4-anilino_quinazolines_and_related	BRCA2	JOW	B7	0.1	9507	2196	81.24	18.76	7.45461	88.27	11.73	6.52515	3.33049	-3.19466	6470.5	868	0	0	0
GW589933X	Other inhibitors	02:Oxindoles	BRCA2	JOQ	E9	0.1	18818	5717	76.7	23.3	9.29991	83.935	16.065	4.22471	2.29185	-1.93287	11915.2	2319.5	0	0	0
GW589961A	Other inhibitors	14:Benzimidazolyl_diaryl_ureas	BRCA2	todos12	D3	0.1	15139	3185	82.62	17.38	13.0082	83.5075	16.4925	4.06336	3.75374	-0.309622	12059.2	2388	0	0	0
GW591947A	Other inhibitors	Other inhibitors	BRCA2	JPA	B6	0.1	7004	1879	78.85	21.15	8.52902	87.135	12.865	5.77303	2.72813	-3.0449	5664.5	851.25	0	0	0
GW599550X	Other inhibitors	Other inhibitors	BRCA2	JP2	F10	0.1	10368	2475	80.73	19.27	9.18537	83.9525	16.0475	4.2315	3.18941	-1.04209	9657.5	1881	0	0	0
GW607049A	Other inhibitors	Other inhibitors	BRCA2	todos12	D1	0.1	11832	2106	84.89	15.11	13.0082	83.5075	16.4925	4.06336	4.61813	0.554772	12059.2	2388	1.88445	11.809	9.9246
GW607117X	Other inhibitors	11:Biaryl_amides	BRCA2	JOQ	G9	0.1	12133	2867	80.89	19.11	9.29991	83.935	16.065	4.22471	3.23286	-0.99185	11915.2	2319.5	0	0	0
GW608005X	Other inhibitors	Other inhibitors	BRCA2	JP2	D6	0.1	10650	2518	80.88	19.12	9.18537	83.9525	16.0475	4.2315	3.23013	-1.00137	9657.5	1881	0	0	0
GW612286X	Other inhibitors	16:2,4-diamino_pyrimidines	BRCA2	JOV	D11	0.1	14399	4273	77.12	22.88	13.1823	80.96	19.04	3.2521	2.37063	-0.881471	11727.5	2791	0	0	0
GW615311X	Other inhibitors	04:4-anilino_quinazolines_and_related	BRCA2	JOV	A3	0.1	8217	2392	77.45	22.55	13.1823	80.96	19.04	3.2521	2.43459	-0.817511	11727.5	2791	29.9339	14.296	-15.638
GW616030X	Other inhibitors	04:4-anilino_quinazolines_and_related	BRCA2	JOQ	B5	0.1	15425	3121	83.17	16.83	9.29991	83.935	16.065	4.22471	3.94177	-0.282941	11915.2	2319.5	0	0	0
GW618013X	Other inhibitors	Other inhibitors	BRCA2	todos12	B1	0.1	10460	2105	83.25	16.75	13.0082	83.5075	16.4925	4.06336	3.97015	-0.0932129	12059.2	2388	13.2616	11.8509	-1.41068
GW621431X	Other inhibitors	08:2-amino_oxazoles	BRCA2	JOV	D2	0.1	14041	3373	80.63	19.37	13.1823	80.96	19.04	3.2521	3.16262	-0.0894782	11727.5	2791	0	0	0
GW621581X	Other inhibitors	Other inhibitors	BRCA2	JPV	E2	0.1	8628	2319	78.82	21.18	15.0119	82.225	17.775	3.62588	2.72144	-0.904444	7174.5	1557.5	0	0	0
GW621823A	Other inhibitors	04:4-anilino_quinazolines_and_related	BRCA2	JOQ	B4	0.1	20080	3762	84.22	15.78	9.29991	83.935	16.065	4.22471	4.33714	0.112424	11915.2	2319.5	0	0	0
GW621970X	Other inhibitors	08:2-amino_oxazoles	BRCA2	JOV	B5	0.1	10821	2956	78.54	21.46	13.1823	80.96	19.04	3.2521	2.65983	-0.592269	11727.5	2791	7.7297	0	-7.7297
GW622055X	Other inhibitors	08:2-amino_oxazoles	BRCA2	JOQ	H6	0.1	9782	2163	81.89	18.11	9.29991	83.935	16.065	4.22471	3.52181	-0.702901	11915.2	2319.5	17.9035	6.74714	-11.1564
GW622475X	Other inhibitors	Other inhibitors	BRCA2	JP2	H10	0.1	8827	2126	80.59	19.41	9.18537	83.9525	16.0475	4.2315	3.15198	-1.07952	9657.5	1881	8.59953	0	-8.59953
GW630813X	Other inhibitors	Other inhibitors	BRCA2	JPV	E7	0.1	6513	1791	78.43	21.57	15.0119	82.225	17.775	3.62588	2.63607	-0.98981	7174.5	1557.5	9.22015	0	-9.22015
GW630823A	Other inhibitors	Other inhibitors	BRCA2	JPA	A7	0.1	6847	1541	81.63	18.37	8.52902	87.135	12.865	5.77303	3.44366	-2.32937	5664.5	851.25	0	0	0
GW631581B	Other inhibitors	08:2-amino_oxazoles	BRCA2	JOV	C9	0.1	11649	3044	79.28	20.72	13.1823	80.96	19.04	3.2521	2.82625	-0.425846	11727.5	2791	0.669367	0	-0.669367
GW632046X	Other inhibitors	08:2-amino_oxazoles	BRCA2	JOW	F3	0.1	9005	2435	78.72	21.28	7.45461	88.27	11.73	6.52515	2.69925	-3.8259	6470.5	868	0	0	0
GW632580X	Other inhibitors	31:3-benzyl_pyrimidines	BRCA2	JOW	A3	0.1	11078	2394	82.23	17.77	7.45461	88.27	11.73	6.52515	3.62746	-2.89769	6470.5	868	0	0	0
GW635815X	Other inhibitors	Other inhibitors	BRCA2	JPV	D5	0.1	8628	1948	81.58	18.42	15.0119	82.225	17.775	3.62588	3.42888	-0.196997	7174.5	1557.5	0	0	0
GW639905A	Other inhibitors	Other inhibitors	BRCA2	JPV	F5	0.1	7111	1808	79.73	20.27	15.0119	82.225	17.775	3.62588	2.9334	-0.69248	7174.5	1557.5	0.885079	0	-0.885079
GW642125X	Other inhibitors	18:Furopyrimidines_and_related	BRCA2	JOV	E11	0.1	9298	2412	79.4	20.6	13.1823	80.96	19.04	3.2521	2.85437	-0.397732	11727.5	2791	20.7163	13.5794	-7.1369
GW642138X	Other inhibitors	18:Furopyrimidines_and_related	BRCA2	JOQ	A11	0.1	12357	2555	82.87	17.13	9.29991	83.935	16.065	4.22471	3.83771	-0.387	11915.2	2319.5	0	0	0
GW643971X	Other inhibitors	09:4-hydrazinly_pyrazolopyrimidines	BRCA2	JOW	B9	0.1	10201	2948	77.58	22.42	7.45461	88.27	11.73	6.52515	2.4603	-4.06485	6470.5	868	0	0	0
GW644007X	Other inhibitors	09:4-hydrazinly_pyrazolopyrimidines	BRCA2	JOQ	A2	0.1	15509	2899	84.25	15.75	9.29991	83.935	16.065	4.22471	4.34921	0.124494	11915.2	2319.5	0	0	0
GW651576X	Other inhibitors	22:4-anilino_5-alkynyl_pyrimidines	BRCA2	JOQ	H1	0.1	9389	1796	83.94	16.06	9.29991	83.935	16.065	4.22471	4.22665	0.00193796	11915.2	2319.5	21.2018	22.5695	1.3677
GW654607A	Other inhibitors	Other inhibitors	BRCA2	JPV	D9	0.1	11552	3072	78.99	21.01	15.0119	82.225	17.775	3.62588	2.75964	-0.866241	7174.5	1557.5	0	0	0
GW654652X	Other inhibitors	Other inhibitors	BRCA2	JOV	C7	0.1	11998	3235	78.76	21.24	13.1823	80.96	19.04	3.2521	2.7081	-0.544003	11727.5	2791	0	0	0
GW659008A	Other inhibitors	Other inhibitors	BRCA2	todos12	D5	0.1	11478	2418	82.6	17.4	13.0082	83.5075	16.4925	4.06336	3.74713	-0.316236	12059.2	2388	4.81995	0	-4.81995
GW659009A	Other inhibitors	"2,4-Dianilinopyrimdine"	BRCA2	JPG	F1	0.1	12360	2868	81.17	18.83	16.6645	80.945	19.055	3.24797	3.31067	0.062708	12938	3047	4.46746	5.87463	1.40717
GW659386A	Other inhibitors	14:Benzimidazolyl_diaryl_ureas	BRCA2	JOQ	H5	0.1	9692	2075	82.37	17.63	9.29991	83.935	16.065	4.22471	3.67215	-0.552562	11915.2	2319.5	18.6589	10.5411	-8.1178
GW663929X	Other inhibitors	Other inhibitors	BRCA2	JP9	C7	0.1	12114	3622	76.98	23.02	12.7758	81.1775	18.8225	3.31279	2.34405	-0.968742	10189.5	2375	0	0	0
GW664114X	Other inhibitors	Other inhibitors	BRCA2	JPV	A5	0.1	6487	1586	80.35	19.65	15.0119	82.225	17.775	3.62588	3.08906	-0.536821	7174.5	1557.5	9.58255	0	-9.58255
GW673715X	Other inhibitors	14:Benzimidazolyl_diaryl_ureas	BRCA2	JOW	A2	0.1	11111	2205	83.44	16.56	7.45461	88.27	11.73	6.52515	4.03865	-2.4865	6470.5	868	0	0	0
GW678313X	Other inhibitors	08:2-amino_oxazoles	BRCA2	JOQ	C11	0.1	14788	3389	81.36	18.64	9.29991	83.935	16.065	4.22471	3.36481	-0.859905	11915.2	2319.5	0	0	0
GW679395X	Other inhibitors	Other inhibitors	BRCA2	JP2	H8	0.1	8817	1978	81.68	18.32	9.18537	83.9525	16.0475	4.2315	3.45852	-0.772985	9657.5	1881	8.70308	0	-8.70308
GW679396X	Other inhibitors	Other inhibitors	BRCA2	JPV	B9	0.1	7236	2026	78.13	21.87	15.0119	82.225	17.775	3.62588	2.57247	-1.05341	7174.5	1557.5	0	0	0
GW679410X	Other inhibitors	06:4-pyridyl_ortho-aryl_azoles	BRCA2	JOQ	F2	0.1	13844	3803	78.45	21.55	9.29991	83.935	16.065	4.22471	2.64037	-1.58434	11915.2	2319.5	0	0	0
GW680061X	Other inhibitors	Other inhibitors	BRCA2	todos12	D9	0.1	10494	2176	82.83	17.17	13.0082	83.5075	16.4925	4.06336	3.82411	-0.23925	12059.2	2388	12.9797	8.87772	-4.10194
GW680191X	Other inhibitors	04:4-anilino_quinazolines_and_related	BRCA2	JOQ	G11	0.1	12243	2951	80.58	19.42	9.29991	83.935	16.065	4.22471	3.14933	-1.07538	11915.2	2319.5	0	0	0
GW680338X	Other inhibitors	Other inhibitors	BRCA2	JPV	F11	0.1	8364	2129	79.71	20.29	15.0119	82.225	17.775	3.62588	2.92854	-0.697343	7174.5	1557.5	0	0	0
GW680908A	Other inhibitors	14:Benzimidazolyl_diaryl_ureas	BRCA2	JOW	B5	0.1	12223	3183	79.34	20.66	7.45461	88.27	11.73	6.52515	2.84027	-3.68488	6470.5	868	0	0	0
GW680975X	Other inhibitors	06:4-pyridyl_ortho-aryl_azoles	BRCA2	todos12	B3	0.1	13853	2678	83.8	16.2	13.0082	83.5075	16.4925	4.06336	4.17284	0.109477	12059.2	2388	0	0	0
GW681170A	Other inhibitors	Other inhibitors	BRCA2	JP9	B1	0.1	15177	3986	79.2	20.8	12.7758	81.1775	18.8225	3.31279	2.80769	-0.505098	10189.5	2375	0	0	0
GW681251X	Other inhibitors	Other inhibitors	BRCA2	JP9	H4	0.1	12318	3162	79.57	20.43	12.7758	81.1775	18.8225	3.31279	2.89476	-0.418028	10189.5	2375	0	0	0
GW682569X	Other inhibitors	Other inhibitors	BRCA2	JPV	E11	0.1	8425	2063	80.33	19.67	15.0119	82.225	17.775	3.62588	3.08388	-0.541995	7174.5	1557.5	0	0	0
GW683134A	Other inhibitors	14:Benzimidazolyl_diaryl_ureas	BRCA2	JPG	E2	0.1	16106	3967	80.24	19.76	16.6645	80.945	19.055	3.24797	3.06073	-0.187238	12938	3047	0	0	0
GW683134A	Other inhibitors	14:Benzimidazolyl_diaryl_ureas	BRCA2	todos12	C1	0.1	14705	3243	81.93	18.07	13.0082	83.5075	16.4925	4.06336	3.53403	-0.529328	12059.2	2388	0	0	0
GW683768X	Other inhibitors	07:2H-3_pyrimidinyl_pyrazolopyridazines	BRCA2	JOV	F11	0.1	8129	2044	79.91	20.09	13.1823	80.96	19.04	3.2521	2.9776	-0.2745	11727.5	2791	30.6843	26.7646	-3.91969
GW684083X	Other inhibitors	Other inhibitors	BRCA2	JPG	B1	0.1	14955	3340	81.74	18.26	16.6645	80.945	19.055	3.24797	3.47645	0.228485	12938	3047	0	0	0
GW684088X	Other inhibitors	Other inhibitors	BRCA2	JP9	F10	0.1	14185	3836	78.71	21.29	12.7758	81.1775	18.8225	3.31279	2.69704	-0.61575	10189.5	2375	0	0	0
GW684374X	Other inhibitors	Other inhibitors	BRCA2	JP2	E10	0.1	11999	2747	81.37	18.63	9.18537	83.9525	16.0475	4.2315	3.36769	-0.863814	9657.5	1881	0	0	0
GW684626B	Other inhibitors	13:Anilino_thienopyrimidines	BRCA2	JOW	C5	0.1	9607	2479	79.49	20.51	7.45461	88.27	11.73	6.52515	2.87567	-3.64948	6470.5	868	0	0	0
GW684941X	Other inhibitors	Other inhibitors	BRCA2	JP2	H3	0.1	9484	2340	80.21	19.79	9.18537	83.9525	16.0475	4.2315	3.05306	-1.17844	9657.5	1881	1.79653	0	-1.79653
GW689066X	Other inhibitors	Other inhibitors	BRCA2	JP2	G11	0.1	9864	2744	78.24	21.76	9.18537	83.9525	16.0475	4.2315	2.59559	-1.63591	9657.5	1881	0	0	0
GW693028X	Other inhibitors	Other inhibitors	BRCA2	JP9	B9	0.1	14726	3845	79.3	20.7	12.7758	81.1775	18.8225	3.31279	2.83092	-0.481873	10189.5	2375	0	0	0
GW693542X	Other inhibitors	Other inhibitors	BRCA2	JP9	G1	0.1	11171	2618	81.01	18.99	12.7758	81.1775	18.8225	3.31279	3.26593	-0.0468611	10189.5	2375	0	0	0
GW693917X	Other inhibitors	Other inhibitors	BRCA2	JOQ	H8	0.1	15153	3790	79.99	20.01	9.29991	83.935	16.065	4.22471	2.9975	-1.22721	11915.2	2319.5	0	0	0
GW694234A	Other inhibitors	14:Benzimidazolyl_diaryl_ureas	BRCA2	JOV	E5	0.1	8858	2308	79.33	20.67	13.1823	80.96	19.04	3.2521	2.83793	-0.414171	11727.5	2791	24.4681	17.3056	-7.16251
GW694590A	Other inhibitors	14:Benzimidazolyl_diaryl_ureas	BRCA2	JOQ	H4	0.1	10548	2591	80.28	19.72	9.29991	83.935	16.065	4.22471	3.07099	-1.15372	11915.2	2319.5	11.4748	0	-11.4748
GW695874X	Other inhibitors	06:4-pyridyl_ortho-aryl_azoles	BRCA2	todos12	F3	0.1	7207	1639	81.47	18.53	13.0082	83.5075	16.4925	4.06336	3.39665	-0.666708	12059.2	2388	40.2367	31.3652	-8.87159
GW696155X	Other inhibitors	Pyrazolopyridizine and related	BRCA2	JPG	D2	0.1	14976	3207	82.36	17.64	16.6645	80.945	19.055	3.24797	3.66893	0.420968	12938	3047	0	0	0
GW697465A	Other inhibitors	Other inhibitors	BRCA2	todos12	H9	0.1	11719	2184	84.29	15.71	13.0082	83.5075	16.4925	4.06336	4.36537	0.30201	12059.2	2388	2.82149	8.54271	5.72123
GW697999A	Other inhibitors	Other inhibitors	BRCA2	todos12	A8	0.1	11770	2275	83.8	16.2	13.0082	83.5075	16.4925	4.06336	4.17284	0.109477	12059.2	2388	2.39857	4.73199	2.33342
GW701424A	Other inhibitors	Other inhibitors	BRCA2	JP2	G10	0.1	10843	2961	78.55	21.45	9.18537	83.9525	16.0475	4.2315	2.662	-1.5695	9657.5	1881	0	0	0
GW701427A	Other inhibitors	14:Benzimidazolyl_diaryl_ureas	BRCA2	JOW	F1	0.1	11123	2736	80.26	19.74	7.45461	88.27	11.73	6.52515	3.06586	-3.45929	6470.5	868	0	0	0
GW703087X	Other inhibitors	22:4-anilino_5-alkynyl_pyrimidines	BRCA2	JOV	F2	0.1	7541	2219	77.26	22.74	13.1823	80.96	19.04	3.2521	2.39754	-0.854563	11727.5	2791	35.6981	20.4944	-15.2037
GW707818B	Other inhibitors	Other inhibitors	BRCA2	JP9	C8	0.1	14334	4628	75.59	24.41	12.7758	81.1775	18.8225	3.31279	2.09668	-1.21611	10189.5	2375	0	0	0
GW708336X	Other inhibitors	07:2H-3_pyrimidinyl_pyrazolopyridazines	BRCA2	JOW	C2	0.1	10630	2466	81.17	18.83	7.45461	88.27	11.73	6.52515	3.31067	-3.21447	6470.5	868	0	0	0
GW709042A	Other inhibitors	14:Benzimidazolyl_diaryl_ureas	BRCA2	JOV	B8	0.1	13216	3529	78.93	21.07	13.1823	80.96	19.04	3.2521	2.74608	-0.506016	11727.5	2791	0	0	0
GW711782X	Other inhibitors	06:4-pyridyl_ortho-aryl_azoles	BRCA2	JOV	D7	0.1	11837	2820	80.76	19.24	13.1823	80.96	19.04	3.2521	3.19751	-0.0545956	11727.5	2791	0	0	0
GW743024X	Other inhibitors	11:Biaryl_amides	BRCA2	JOV	E8	0.1	7660	1792	81.04	18.96	13.1823	80.96	19.04	3.2521	3.27426	0.0221608	11727.5	2791	34.6834	35.7936	1.11019
GW759710A	Other inhibitors	16:2,4-diamino_pyrimidines	BRCA2	JOV	E3	0.1	8763	2166	80.18	19.82	13.1823	80.96	19.04	3.2521	3.04541	-0.206692	11727.5	2791	25.2782	22.3934	-2.88478
GW767488X	Other inhibitors	Other inhibitors	BRCA2	JPV	F9	0.1	7797	1696	82.13	17.87	15.0119	82.225	17.775	3.62588	3.59597	-0.0299081	7174.5	1557.5	0	0	0
GW768504A	Other inhibitors	Other inhibitors	BRCA2	JPV	E8	0.1	7859	1800	81.36	18.64	15.0119	82.225	17.775	3.62588	3.36481	-0.261072	7174.5	1557.5	0	0	0
GW768505X	Other inhibitors	Other inhibitors	BRCA2	JOQ	A9	0.1	13721	2722	83.45	16.55	9.29991	83.935	16.065	4.22471	4.0423	-0.182416	11915.2	2319.5	0	0	0
GW769076X	Other inhibitors	11:Biaryl_amides	BRCA2	JOQ	G4	0.1	14532	3180	82.05	17.95	9.29991	83.935	16.065	4.22471	3.57103	-0.653681	11915.2	2319.5	0	0	0
GW770220A	Other inhibitors	16:2,4-diamino_pyrimidines	BRCA2	JOV	E4	0.1	8710	2113	80.48	19.52	13.1823	80.96	19.04	3.2521	3.12295	-0.12915	11727.5	2791	25.7301	24.2924	-1.43775
GW770249A	Other inhibitors	18:Furopyrimidines_and_related	BRCA2	JOQ	G8	0.1	14321	3129	82.07	17.93	9.29991	83.935	16.065	4.22471	3.57724	-0.647467	11915.2	2319.5	0	0	0
GW775604X	Other inhibitors	Other inhibitors	BRCA2	JPA	G8	0.1	7157	1835	79.59	20.41	8.52902	87.135	12.865	5.77303	2.89956	-2.87347	5664.5	851.25	0	0	0
GW775608X	Other inhibitors	11:Biaryl_amides	BRCA2	todos12	H6	0.1	13217	2579	83.67	16.33	13.0082	83.5075	16.4925	4.06336	4.1237	0.0603366	12059.2	2388	0	0	0
GW775610X	Other inhibitors	Other inhibitors	BRCA2	JPA	E1	0.1	10608	2673	79.87	20.13	8.52902	87.135	12.865	5.77303	2.96771	-2.80532	5664.5	851.25	0	0	0
GW776245A	Other inhibitors	Other inhibitors	BRCA2	JPG	E3	0.1	10014	2270	81.52	18.48	16.6645	80.945	19.055	3.24797	3.41126	0.163289	12938	3047	22.6001	25.5005	2.9004
GW777257X	Other inhibitors	Other inhibitors	BRCA2	JP9	G11	0.1	11806	3046	79.49	20.51	12.7758	81.1775	18.8225	3.31279	2.87567	-0.43712	10189.5	2375	0	0	0
GW779439X	Other inhibitors	07:2H-3_pyrimidinyl_pyrazolopyridazines	BRCA2	JOQ	E10	0.1	1015	216	82.45	17.55	9.29991	83.935	16.065	4.22471	3.69801	-0.526706	11915.2	2319.5	91.4815	90.6876	-0.793857
GW779439X	Other inhibitors	07:2H-3_pyrimidinyl_pyrazolopyridazines	BRCA2	JOQ	E10	0.1	1015	216	82.45	17.55	9.29991	83.935	16.065	4.22471	3.69801	-0.526706	11915.2	2319.5	91.4815	90.6876	-0.793857
GW779439X	Other inhibitors	07:2H-3_pyrimidinyl_pyrazolopyridazines	BRCA2	todos12	B5	0.1	2541	407	86.19	13.81	13.0082	83.5075	16.4925	4.06336	5.24113	1.17777	12059.2	2388	78.929	82.9564	4.02741
GW779439X	Other inhibitors	07:2H-3_pyrimidinyl_pyrazolopyridazines	BRCA2	todos12	B5	0.1	2541	407	86.19	13.81	13.0082	83.5075	16.4925	4.06336	5.24113	1.17777	12059.2	2388	78.929	82.9564	4.02741
GW780159X	Other inhibitors	21:2-pyridinyl_imidazoles_and_related	BRCA2	JOW	A6	0.1	9505	2380	79.97	20.03	7.45461	88.27	11.73	6.52515	2.99251	-3.53264	6470.5	868	0	0	0
GW781483X	Other inhibitors	Other inhibitors	BRCA2	JPA	F1	0.1	8923	2096	80.98	19.02	8.52902	87.135	12.865	5.77303	3.25762	-2.5154	5664.5	851.25	0	0	0
GW781673X	Other inhibitors	07:2H-3_pyrimidinyl_pyrazolopyridazines	BRCA2	todos12	G3	0.1	14593	2249	86.65	13.35	13.0082	83.5075	16.4925	4.06336	5.49064	1.42727	12059.2	2388	0	5.82077	5.82077
GW782907X	Other inhibitors	11:Biaryl_amides	BRCA2	todos12	A6	0.1	13245	2641	83.38	16.62	13.0082	83.5075	16.4925	4.06336	4.01685	-0.046515	12059.2	2388	0	0	0
GW782912X	Other inhibitors	11:Biaryl_amides	BRCA2	JOW	B4	0.1	9154	2010	82	18	7.45461	88.27	11.73	6.52515	3.55556	-2.96959	6470.5	868	0	0	0
GW784041A	Other inhibitors	"2,4-Dianilinopyrimdine"	BRCA2	JPV	G6	0.1	7151	2118	77.15	22.85	15.0119	82.225	17.775	3.62588	2.37637	-1.24951	7174.5	1557.5	0.327549	0	-0.327549
GW784307A	Other inhibitors	09:4-hydrazinly_pyrazolopyrimidines	BRCA2	JOQ	C5	0.1	18181	4562	79.94	20.06	9.29991	83.935	16.065	4.22471	2.98504	-1.23967	11915.2	2319.5	0	0	0
GW784684X	Other inhibitors	13:Anilino_thienopyrimidines	BRCA2	JOW	F11	0.1	9004	2239	80.09	19.91	7.45461	88.27	11.73	6.52515	3.0226	-3.50255	6470.5	868	0	0	0
GW784684X	Other inhibitors	13:Anilino_thienopyrimidines	BRCA2	JOW	F11	0.1	9004	2239	80.09	19.91	7.45461	88.27	11.73	6.52515	3.0226	-3.50255	6470.5	868	0	0	0
GW785404X	Other inhibitors	03:Furazan_benzimidazoles	BRCA2	JOQ	D4	0.1	16342	4563	78.17	21.83	9.29991	83.935	16.065	4.22471	2.58085	-1.64386	11915.2	2319.5	0	0	0
GW785804X	Other inhibitors	21:2-pyridinyl_imidazoles_and_related	BRCA2	todos12	E3	0.1	6278	1169	84.3	15.7	13.0082	83.5075	16.4925	4.06336	4.36943	0.306065	12059.2	2388	47.9404	51.0469	3.10652
GW785974X	Other inhibitors	11:Biaryl_amides	BRCA2	JOV	F9	0.1	7952	2129	78.88	21.12	13.1823	80.96	19.04	3.2521	2.73485	-0.517252	11727.5	2791	32.1936	23.7191	-8.47447
GW786460X	Other inhibitors	21:2-pyridinyl_imidazoles_and_related	BRCA2	JOW	H7	0.1	10507	2487	80.86	19.14	7.45461	88.27	11.73	6.52515	3.22466	-3.30049	6470.5	868	0	0	0
GW787226A	Other inhibitors	Other inhibitors	BRCA2	JPV	H4	0.1	9422	2323	80.22	19.78	15.0119	82.225	17.775	3.62588	3.05561	-0.570267	7174.5	1557.5	0	0	0
GW789449X	Other inhibitors	Other inhibitors	BRCA2	JPA	E4	0.1	6972	1314	84.14	15.86	8.52902	87.135	12.865	5.77303	4.30517	-1.46786	5664.5	851.25	0	0	0
GW792479X	Other inhibitors	Other inhibitors	BRCA2	JP9	C5	0.1	17453	4583	79.2	20.8	12.7758	81.1775	18.8225	3.31279	2.80769	-0.505098	10189.5	2375	0	0	0
GW795486X	Other inhibitors	18:Furopyrimidines_and_related	BRCA2	JOV	H1	0.1	7498	1512	83.22	16.78	13.1823	80.96	19.04	3.2521	3.95948	0.707375	11727.5	2791	36.0648	45.8259	9.76106
GW796920X	Other inhibitors	11:Biaryl_amides	BRCA2	JOW	H11	0.1	9566	1955	83.03	16.97	7.45461	88.27	11.73	6.52515	3.89275	-2.6324	6470.5	868	0	0	0
GW796921X	Other inhibitors	11:Biaryl_amides	BRCA2	JOW	D1	0.1	13693	3389	80.16	19.84	7.45461	88.27	11.73	6.52515	3.04032	-3.48483	6470.5	868	0	0	0
GW799251X	Other inhibitors	22:4-anilino_5-alkynyl_pyrimidines	BRCA2	JOV	A4	0.1	12142	2903	80.7	19.3	13.1823	80.96	19.04	3.2521	3.18135	-0.0707537	11727.5	2791	0	0	0
GW800172X	Other inhibitors	Other inhibitors	BRCA2	JPA	G5	0.1	6885	1725	79.97	20.03	8.52902	87.135	12.865	5.77303	2.99251	-2.78052	5664.5	851.25	0	0	0
GW801372X	Other inhibitors	07:2H-3_pyrimidinyl_pyrazolopyridazines	BRCA2	JOQ	D8	0.1	20716	4296	82.82	17.18	9.29991	83.935	16.065	4.22471	3.82072	-0.40399	11915.2	2319.5	0	0	0
GW804482X	Other inhibitors	05:Benzimidazole_N-thiophenes	BRCA2	JOW	G10	0.1	11288	2734	80.5	19.5	7.45461	88.27	11.73	6.52515	3.12821	-3.39694	6470.5	868	0	0	0
GW805758X	Other inhibitors	07:2H-3_pyrimidinyl_pyrazolopyridazines	BRCA2	todos12	E4	0.1	9597	1757	84.53	15.47	13.0082	83.5075	16.4925	4.06336	4.46412	0.400762	12059.2	2388	20.4179	26.4238	6.00585
GW805758X	Other inhibitors	07:2H-3_pyrimidinyl_pyrazolopyridazines	BRCA2	todos12	E4	0.1	9597	1757	84.53	15.47	13.0082	83.5075	16.4925	4.06336	4.46412	0.400762	12059.2	2388	20.4179	26.4238	6.00585
GW806290X	Other inhibitors	07:2H-3_pyrimidinyl_pyrazolopyridazines	BRCA2	JOW	H3	0.1	2074	355	85.38	14.62	7.45461	88.27	11.73	6.52515	4.83995	-1.6852	6470.5	868	67.9468	59.1014	-8.84545
GW806776X	Other inhibitors	11:Biaryl_amides	BRCA2	JOW	G11	0.1	8894	2053	81.25	18.75	7.45461	88.27	11.73	6.52515	3.33333	-3.19182	6470.5	868	0	0	0
GW807982X	Other inhibitors	07:2H-3_pyrimidinyl_pyrazolopyridazines	BRCA2	JOV	E1	0.1	15888	4215	79.03	20.97	13.1823	80.96	19.04	3.2521	2.76872	-0.483384	11727.5	2791	0	0	0
GW809885X	Other inhibitors	09:4-hydrazinly_pyrazolopyrimidines	BRCA2	JOW	E8	0.1	13577	3255	80.66	19.34	7.45461	88.27	11.73	6.52515	3.17063	-3.35452	6470.5	868	0	0	0
GW809893X	Other inhibitors	Other inhibitors	BRCA2	JP2	A7	0.1	7250	1712	80.9	19.1	9.18537	83.9525	16.0475	4.2315	3.2356	-0.995898	9657.5	1881	24.9288	8.98458	-15.9442
GW809897X	Other inhibitors	16:2,4-diamino_pyrimidines	BRCA2	JOQ	B8	0.1	16136	3872	80.65	19.35	9.29991	83.935	16.065	4.22471	3.16796	-1.05675	11915.2	2319.5	0	0	0
GW810083X	Other inhibitors	Other inhibitors	BRCA2	todos12	D7	0.1	14209	2919	82.96	17.04	13.0082	83.5075	16.4925	4.06336	3.86854	-0.194818	12059.2	2388	0	0	0
GW810372X	Other inhibitors	07:2H-3_pyrimidinyl_pyrazolopyridazines	BRCA2	JOV	C5	0.1	11865	2567	82.21	17.79	13.1823	80.96	19.04	3.2521	3.62114	0.369035	11727.5	2791	0	8.0258	8.0258
GW810437X	Other inhibitors	Other inhibitors	BRCA2	JP2	F8	0.1	11767	2899	80.23	19.77	9.18537	83.9525	16.0475	4.2315	3.05817	-1.17333	9657.5	1881	0	0	0
GW810445X	Other inhibitors	Other inhibitors	BRCA2	JPA	D10	0.1	7677	1899	80.17	19.83	8.52902	87.135	12.865	5.77303	3.04286	-2.73016	5664.5	851.25	0	0	0
GW810578X	Other inhibitors	Pyrazolopyridizine and related	BRCA2	JP2	G7	0.1	10040	2375	80.87	19.13	9.18537	83.9525	16.0475	4.2315	3.22739	-1.00411	9657.5	1881	0	0	0
GW811168X	Other inhibitors	09:4-hydrazinly_pyrazolopyrimidines	BRCA2	JOV	F6	0.1	11319	2454	82.18	17.82	13.1823	80.96	19.04	3.2521	3.61167	0.359571	11727.5	2791	3.48327	12.0745	8.59126
GW811603A	Other inhibitors	Other inhibitors	BRCA2	JPA	E8	0.1	8388	2057	80.31	19.69	8.52902	87.135	12.865	5.77303	3.07872	-2.69431	5664.5	851.25	0	0	0
GW812171X	Other inhibitors	Other inhibitors	BRCA2	JPV	B7	0.1	8767	2067	80.92	19.08	15.0119	82.225	17.775	3.62588	3.24109	-0.384789	7174.5	1557.5	0	0	0
GW813244A	Other inhibitors	Other inhibitors	BRCA2	todos12	B8	0.1	9781	2422	80.15	19.85	13.0082	83.5075	16.4925	4.06336	3.03778	-1.02558	12059.2	2388	18.8921	0	-18.8921
GW813360X	Other inhibitors	09:4-hydrazinly_pyrazolopyrimidines	BRCA2	JOV	A9	0.1	10894	2922	78.85	21.15	13.1823	80.96	19.04	3.2521	2.72813	-0.523968	11727.5	2791	7.10723	0	-7.10723
GW814408X	Other inhibitors	09:4-hydrazinly_pyrazolopyrimidines	BRCA2	JOW	G8	0.1	12313	2594	82.6	17.4	7.45461	88.27	11.73	6.52515	3.74713	-2.77802	6470.5	868	0	0	0
GW817394X	Other inhibitors	09:4-hydrazinly_pyrazolopyrimidines	BRCA2	JOQ	E8	0.1	17799	5030	77.97	22.03	9.29991	83.935	16.065	4.22471	2.53926	-1.68545	11915.2	2319.5	0	0	0
GW817396X	Other inhibitors	09:4-hydrazinly_pyrazolopyrimidines	BRCA2	JOW	C4	0.1	10312	2342	81.49	18.51	7.45461	88.27	11.73	6.52515	3.40249	-3.12266	6470.5	868	0	0	0
GW818941X	Other inhibitors	Other inhibitors	BRCA2	JPA	H11	0.1	9180	2166	80.91	19.09	8.52902	87.135	12.865	5.77303	3.23834	-2.53468	5664.5	851.25	0	0	0
GW819077X	Other inhibitors	07:2H-3_pyrimidinyl_pyrazolopyridazines	BRCA2	JOV	D8	0.1	17094	4696	78.45	21.55	13.1823	80.96	19.04	3.2521	2.64037	-0.61173	11727.5	2791	0	0	0
GW819230X	Other inhibitors	18:Furopyrimidines_and_related	BRCA2	JOW	G6	0.1	8488	2169	79.65	20.35	7.45461	88.27	11.73	6.52515	2.914	-3.61114	6470.5	868	0	0	0
GW823670X	Other inhibitors	Other inhibitors	BRCA2	JP9	E10	0.1	13581	4021	77.16	22.84	12.7758	81.1775	18.8225	3.31279	2.37828	-0.934507	10189.5	2375	0	0	0
GW824645A	Other inhibitors	27:3-amino_pyrazoles	BRCA2	JOW	D4	0.1	12372	3272	79.08	20.92	7.45461	88.27	11.73	6.52515	2.78011	-3.74503	6470.5	868	0	0	0
GW824645A	Other inhibitors	27:3-amino_pyrazoles	BRCA2	JP2	E4	0.1	10775	2601	80.55	19.45	9.18537	83.9525	16.0475	4.2315	3.14139	-1.09011	9657.5	1881	0	0	0
GW827102X	Other inhibitors	15:2-aryl_3-pyridimidinyl_pyrazolopyridazines	BRCA2	JOV	D5	0.1	13334	3008	81.59	18.41	13.1823	80.96	19.04	3.2521	3.43183	0.17973	11727.5	2791	0	0	0
GW827105X	Other inhibitors	15:2-aryl_3-pyridimidinyl_pyrazolopyridazines	BRCA2	JOQ	E7	0.1	11993	2645	81.93	18.07	9.29991	83.935	16.065	4.22471	3.53403	-0.690678	11915.2	2319.5	0	0	0
GW827106X	Other inhibitors	15:2-aryl_3-pyridimidinyl_pyrazolopyridazines	BRCA2	JOW	B1	0.1	11739	2992	79.69	20.31	7.45461	88.27	11.73	6.52515	2.92368	-3.60147	6470.5	868	0	0	0
GW827396X	Other inhibitors	15:2-aryl_3-pyridimidinyl_pyrazolopyridazines	BRCA2	JOV	H3	0.1	6139	1594	79.39	20.61	13.1823	80.96	19.04	3.2521	2.85201	-0.400087	11727.5	2791	47.653	42.8879	-4.7651
GW827654A	Other inhibitors	Other inhibitors	BRCA2	JPA	E10	0.1	8191	1813	81.88	18.12	8.52902	87.135	12.865	5.77303	3.51876	-2.25426	5664.5	851.25	0	0	0
GW828206X	Other inhibitors	Pyrazolopyridizine and related	BRCA2	JP2	G9	0.1	11197	2543	81.49	18.51	9.18537	83.9525	16.0475	4.2315	3.40249	-0.829015	9657.5	1881	0	0	0
GW828525X	Other inhibitors	15:2-aryl_3-pyridimidinyl_pyrazolopyridazines	BRCA2	JOV	C11	0.1	15268	3654	80.69	19.31	13.1823	80.96	19.04	3.2521	3.17866	-0.0734369	11727.5	2791	0	0	0
GW829058X	Other inhibitors	Other inhibitors	BRCA2	JP9	F11	0.1	10118	2593	79.6	20.4	12.7758	81.1775	18.8225	3.31279	2.90196	-0.41083	10189.5	2375	0.701703	0	-0.701703
GW829116X	Other inhibitors	Other inhibitors	BRCA2	JP2	F9	0.1	11182	2463	81.95	18.05	9.18537	83.9525	16.0475	4.2315	3.54017	-0.691334	9657.5	1881	0	0	0
GW829350X	Other inhibitors	Other inhibitors	BRCA2	JPA	F3	0.1	6486	1558	80.63	19.37	8.52902	87.135	12.865	5.77303	3.16262	-2.6104	5664.5	851.25	0	0	0
GW829874X	Other inhibitors	09:4-hydrazinly_pyrazolopyrimidines	BRCA2	JOQ	F1	0.1	15127	3682	80.42	19.58	9.29991	83.935	16.065	4.22471	3.10725	-1.11746	11915.2	2319.5	0	0	0
GW829877X	Other inhibitors	09:4-hydrazinly_pyrazolopyrimidines	BRCA2	JOW	H9	0.1	10607	2529	80.75	19.25	7.45461	88.27	11.73	6.52515	3.19481	-3.33034	6470.5	868	0	0	0
GW830263A	Other inhibitors	16:2,4-diamino_pyrimidines	BRCA2	todos12	E1	0.1	7047	1485	82.59	17.41	13.0082	83.5075	16.4925	4.06336	3.74383	-0.319537	12059.2	2388	41.5635	37.8141	-3.74946
GW830365A	Other inhibitors	16:2,4-diamino_pyrimidines	BRCA2	JOQ	A4	0.1	16140	3753	81.13	18.87	9.29991	83.935	16.065	4.22471	3.29942	-0.925295	11915.2	2319.5	0	0	0
GW830899A	Other inhibitors	Other inhibitors	BRCA2	JP9	C9	0.1	13595	3803	78.14	21.86	12.7758	81.1775	18.8225	3.31279	2.57457	-0.738225	10189.5	2375	0	0	0
GW830900A	Other inhibitors	16:2,4-diamino_pyrimidines	BRCA2	JOW	A4	0.1	9038	2008	81.82	18.18	7.45461	88.27	11.73	6.52515	3.50055	-3.0246	6470.5	868	0	0	0
GW831090X	Other inhibitors	27:3-amino_pyrazoles	BRCA2	JOQ	D2	0.1	19681	4497	81.4	18.6	9.29991	83.935	16.065	4.22471	3.37634	-0.848368	11915.2	2319.5	0	0	0
GW831091X	Other inhibitors	27:3-amino_pyrazoles	BRCA2	JOV	B9	0.1	10627	2904	78.54	21.46	13.1823	80.96	19.04	3.2521	2.65983	-0.592269	11727.5	2791	9.38393	0	-9.38393
GW835314X	Other inhibitors	Other inhibitors	BRCA2	JPA	E6	0.1	8462	2137	79.84	20.16	8.52902	87.135	12.865	5.77303	2.96032	-2.81271	5664.5	851.25	0	0	0
GW837331X	Other inhibitors	28:Imidazotriazine	BRCA2	JOQ	D5	0.1	14957	3984	78.97	21.03	9.29991	83.935	16.065	4.22471	2.75511	-1.4696	11915.2	2319.5	0	0	0
GW839464X	Other inhibitors	Other inhibitors	BRCA2	JPV	E1	0.1	8434	2080	80.22	19.78	15.0119	82.225	17.775	3.62588	3.05561	-0.570267	7174.5	1557.5	0	0	0
GW843682X	Other inhibitors	05:Benzimidazole_N-thiophenes	BRCA2	JOV	C1	0.1	13099	3324	79.76	20.24	13.1823	80.96	19.04	3.2521	2.94071	-0.311389	11727.5	2791	0	0	0
GW846105X	Other inhibitors	23:3-cyano_thiophenes	BRCA2	JOW	F9	0.1	11258	2958	79.19	20.81	7.45461	88.27	11.73	6.52515	2.80538	-3.71977	6470.5	868	0	0	0
GW852849X	Other inhibitors	05:Benzimidazole_N-thiophenes	BRCA2	JOQ	C7	0.1	12272	2739	81.75	18.25	9.29991	83.935	16.065	4.22471	3.47945	-0.74526	11915.2	2319.5	0	0	0
GW853606X	Other inhibitors	05:Benzimidazole_N-thiophenes	BRCA2	JOQ	C8	0.1	10318	2423	80.98	19.02	9.29991	83.935	16.065	4.22471	3.25762	-0.967089	11915.2	2319.5	13.4051	0	-13.4051
GW853609X	Other inhibitors	05:Benzimidazole_N-thiophenes	BRCA2	JOW	E11	0.1	10376	2151	82.83	17.17	7.45461	88.27	11.73	6.52515	3.82411	-2.70104	6470.5	868	0	0	0
GW854278X	Other inhibitors	Other inhibitors	BRCA2	JPA	C1	0.1	12667	3262	79.52	20.48	8.52902	87.135	12.865	5.77303	2.88281	-2.89022	5664.5	851.25	0	0	0
GW855857X	Other inhibitors	Other inhibitors	BRCA2	JPA	A9	0.1	8159	1929	80.88	19.12	8.52902	87.135	12.865	5.77303	3.23013	-2.5429	5664.5	851.25	0	0	0
GW856795X	Other inhibitors	Other inhibitors	BRCA2	JP2	D3	0.1	13608	3679	78.72	21.28	9.18537	83.9525	16.0475	4.2315	2.69925	-1.53225	9657.5	1881	0	0	0
GW856804X	Other inhibitors	18:Furopyrimidines_and_related	BRCA2	JOV	G8	0.1	7842	1847	80.94	19.06	13.1823	80.96	19.04	3.2521	3.24659	-0.00551112	11727.5	2791	33.1315	33.823	0.691474
GW856805X	Other inhibitors	Other inhibitors	BRCA2	JP9	E9	0.1	15810	4745	76.92	23.08	12.7758	81.1775	18.8225	3.31279	2.33276	-0.980035	10189.5	2375	0	0	0
GW857175X	Other inhibitors	Other inhibitors	BRCA2	JP2	G8	0.1	11759	3341	77.87	22.13	9.18537	83.9525	16.0475	4.2315	2.51875	-1.71275	9657.5	1881	0	0	0
GW867253X	Other inhibitors	Other inhibitors	BRCA2	JP2	D9	0.1	10405	2824	78.65	21.35	9.18537	83.9525	16.0475	4.2315	2.68384	-1.54766	9657.5	1881	0	0	0
GW867587X	Other inhibitors	Other inhibitors	BRCA2	JP9	D7	0.1	11715	3357	77.73	22.27	12.7758	81.1775	18.8225	3.31279	2.49035	-0.822445	10189.5	2375	0	0	0
GW867588X	Other inhibitors	Other inhibitors	BRCA2	JPA	G3	0.1	7457	1826	80.33	19.67	8.52902	87.135	12.865	5.77303	3.08388	-2.68914	5664.5	851.25	0	0	0
GW868318X	Other inhibitors	Other inhibitors	BRCA2	JP9	H1	0.1	12442	2353	84.1	15.9	12.7758	81.1775	18.8225	3.31279	4.28931	0.976518	10189.5	2375	0	0.926316	0.926316
GW869516X	Other inhibitors	Other inhibitors	BRCA2	JPA	D7	0.1	7662	2100	78.49	21.51	8.52902	87.135	12.865	5.77303	2.649	-3.12403	5664.5	851.25	0	0	0
GW869640X	Other inhibitors	Other inhibitors	BRCA2	JPG	B3	0.1	17889	4700	79.19	20.81	16.6645	80.945	19.055	3.24797	2.80538	-0.442584	12938	3047	0	0	0
GW869641X	Other inhibitors	Other inhibitors	BRCA2	JPG	C1	0.1	15789	3899	80.2	19.8	16.6645	80.945	19.055	3.24797	3.05051	-0.197461	12938	3047	0	0	0
GW869810X	Other inhibitors	13:Anilino_thienopyrimidines	BRCA2	JOV	B4	0.1	13569	3640	78.85	21.15	13.1823	80.96	19.04	3.2521	2.72813	-0.523968	11727.5	2791	0	0	0
GW869979X	Other inhibitors	Other inhibitors	BRCA2	JP9	F4	0.1	13157	3487	79.05	20.95	12.7758	81.1775	18.8225	3.31279	2.77327	-0.539521	10189.5	2375	0	0	0
GW872411X	Other inhibitors	Other inhibitors	BRCA2	JP2	E2	0.1	11856	2948	80.09	19.91	9.18537	83.9525	16.0475	4.2315	3.0226	-1.2089	9657.5	1881	0	0	0
GW873004X	Other inhibitors	Other inhibitors	BRCA2	JP2	E9	0.1	11860	3024	79.68	20.32	9.18537	83.9525	16.0475	4.2315	2.92126	-1.31024	9657.5	1881	0	0	0
GW876731X	Other inhibitors	Other inhibitors	BRCA2	JP2	H2	0.1	8582	1698	83.48	16.52	9.18537	83.9525	16.0475	4.2315	4.05327	-0.178231	9657.5	1881	11.1364	9.72887	-1.40755
SB-202620	Other inhibitors	Other inhibitors	BRCA2	JP9	D6	0.1	13003	3686	77.91	22.09	12.7758	81.1775	18.8225	3.31279	2.52694	-0.785855	10189.5	2375	0	0	0
SB-210313	Other inhibitors	06:4-pyridyl_ortho-aryl_azoles	BRCA2	JOV	G2	0.1	8311	2164	79.34	20.66	13.1823	80.96	19.04	3.2521	2.84027	-0.41183	11727.5	2791	29.1324	22.4651	-6.66731
SB-210486	Other inhibitors	Other inhibitors	BRCA2	JPV	D6	0.1	7138	1956	78.49	21.51	15.0119	82.225	17.775	3.62588	2.649	-0.976879	7174.5	1557.5	0.508746	0	-0.508746
SB-211742	Other inhibitors	Other inhibitors	BRCA2	JP9	A6	0.1	9561	2431	79.73	20.27	12.7758	81.1775	18.8225	3.31279	2.9334	-0.379391	10189.5	2375	6.16811	0	-6.16811
SB-211743	Other inhibitors	Other inhibitors	BRCA2	JPG	E1	0.1	9683	2340	80.54	19.46	16.6645	80.945	19.055	3.24797	3.13875	-0.10922	12938	3047	25.1584	23.2032	-1.9553
SB-213663	Other inhibitors	Other inhibitors	BRCA2	JPG	D3	0.1	9403	2050	82.1	17.9	16.6645	80.945	19.055	3.24797	3.58659	0.338626	12938	3047	27.3226	32.7207	5.39809
SB-216385	Other inhibitors	01:4-pyrimidinyl_ortho-aryl_azoles	BRCA2	JOQ	F11	0.1	10226	2356	81.27	18.73	9.29991	83.935	16.065	4.22471	3.33903	-0.885684	11915.2	2319.5	14.1772	0	-14.1772
SB-217146-A	Other inhibitors	Other inhibitors	BRCA2	JPV	G7	0.1	6834	1787	79.27	20.73	15.0119	82.225	17.775	3.62588	2.82393	-0.801952	7174.5	1557.5	4.74598	0	-4.74598
SB-217360	Other inhibitors	Other inhibitors	BRCA2	JPA	B9	0.1	6295	1431	81.48	18.52	8.52902	87.135	12.865	5.77303	3.39957	-2.37346	5664.5	851.25	0	0	0
SB-217780	Other inhibitors	Other inhibitors	BRCA2	JPA	G10	0.1	7480	1949	79.33	20.67	8.52902	87.135	12.865	5.77303	2.83793	-2.9351	5664.5	851.25	0	0	0
SB-219952	Other inhibitors	Other inhibitors	BRCA2	todos12	H5	0.1	11501	2064	84.78	15.22	13.0082	83.5075	16.4925	4.06336	4.5703	0.50694	12059.2	2388	4.62923	13.5678	8.93861
SB-219980	Other inhibitors	Other inhibitors	BRCA2	JP2	H4	0.1	8788	1932	81.98	18.02	9.18537	83.9525	16.0475	4.2315	3.54939	-0.682111	9657.5	1881	9.00337	0	-9.00337
SB-220025-R	Other inhibitors	01:4-pyrimidinyl_ortho-aryl_azoles	BRCA2	JOV	F1	0.1	9607	1995	82.8	17.2	13.1823	80.96	19.04	3.2521	3.81395	0.561853	11727.5	2791	18.0814	28.5202	10.4388
SB-220455	Other inhibitors	01:4-pyrimidinyl_ortho-aryl_azoles	BRCA2	todos12	H3	0.1	14219	2570	84.69	15.31	13.0082	83.5075	16.4925	4.06336	4.53168	0.468317	12059.2	2388	0	0	0
SB-221466	Other inhibitors	01:4-pyrimidinyl_ortho-aryl_azoles	BRCA2	JOQ	G3	0.1	15827	3439	82.15	17.85	9.29991	83.935	16.065	4.22471	3.60224	-0.622471	11915.2	2319.5	0	0	0
SB-222516	Other inhibitors	Other inhibitors	BRCA2	JPV	H6	0.1	7606	1742	81.36	18.64	15.0119	82.225	17.775	3.62588	3.36481	-0.261072	7174.5	1557.5	0	0	0
SB-222517	Other inhibitors	Other inhibitors	BRCA2	JP9	D9	0.1	15134	4361	77.63	22.37	12.7758	81.1775	18.8225	3.31279	2.47027	-0.842518	10189.5	2375	0	0	0
SB-223132	Other inhibitors	Other inhibitors	BRCA2	todos12	E5	0.1	7278	1383	84.03	15.97	13.0082	83.5075	16.4925	4.06336	4.26174	0.198379	12059.2	2388	39.648	42.0854	2.43744
SB-223133	Other inhibitors	01:4-pyrimidinyl_ortho-aryl_azoles	BRCA2	JOW	A7	0.1	9042	1986	81.99	18.01	7.45461	88.27	11.73	6.52515	3.55247	-2.97268	6470.5	868	0	0	0
SB-226605	Other inhibitors	Other inhibitors	BRCA2	JP9	A5	0.1	13200	3046	81.25	18.75	12.7758	81.1775	18.8225	3.31279	3.33333	0.0205428	10189.5	2375	0	0	0
SB-226879	Other inhibitors	01:4-pyrimidinyl_ortho-aryl_azoles	BRCA2	JOV	F5	0.1	7151	1864	79.32	20.68	13.1823	80.96	19.04	3.2521	2.83559	-0.416511	11727.5	2791	39.0237	33.2139	-5.80976
SB-229482	Other inhibitors	Other inhibitors	BRCA2	todos12	B7	0.1	6571	1467	81.75	18.25	13.0082	83.5075	16.4925	4.06336	3.47945	-0.58391	12059.2	2388	45.5107	38.5678	-6.94287
SB-236560	Other inhibitors	Other inhibitors	BRCA2	JP9	G10	0.1	11830	3460	77.37	22.63	12.7758	81.1775	18.8225	3.31279	2.41891	-0.893878	10189.5	2375	0	0	0
SB-238039	Other inhibitors	Other inhibitors	BRCA2	JP9	D2	0.1	15401	3080	83.33	16.67	12.7758	81.1775	18.8225	3.31279	3.9988	0.68601	10189.5	2375	0	0	0
SB-239272	Other inhibitors	01:4-pyrimidinyl_ortho-aryl_azoles	BRCA2	todos12	C3	0.1	12314	2561	82.78	17.22	13.0082	83.5075	16.4925	4.06336	3.8072	-0.256161	12059.2	2388	0	0	0
SB-242717	Other inhibitors	01:4-pyrimidinyl_ortho-aryl_azoles	BRCA2	JOV	B11	0.1	10462	2434	81.13	18.87	13.1823	80.96	19.04	3.2521	3.29942	0.0473162	11727.5	2791	10.7909	12.7911	2.00024
SB-242718	Other inhibitors	01:4-pyrimidinyl_ortho-aryl_azoles	BRCA2	todos12	H4	0.1	12950	2925	81.57	18.43	13.0082	83.5075	16.4925	4.06336	3.42594	-0.637426	12059.2	2388	0	0	0
SB-242719	Other inhibitors	01:4-pyrimidinyl_ortho-aryl_azoles	BRCA2	JOQ	E5	0.1	13990	2874	82.96	17.04	9.29991	83.935	16.065	4.22471	3.86854	-0.356168	11915.2	2319.5	0	0	0
SB-242721	Other inhibitors	01:4-pyrimidinyl_ortho-aryl_azoles	BRCA2	JOV	B10	0.1	10458	2770	79.06	20.94	13.1823	80.96	19.04	3.2521	2.77555	-0.476552	11727.5	2791	10.825	0.752418	-10.0726
SB-245391	Other inhibitors	Other inhibitors	BRCA2	JP9	G7	0.1	10541	2356	81.73	18.27	12.7758	81.1775	18.8225	3.31279	3.47345	0.160663	10189.5	2375	0	0.8	0.8
SB-245392	Other inhibitors	01:4-pyrimidinyl_ortho-aryl_azoles	BRCA2	JOV	G4	0.1	7313	1744	80.74	19.26	13.1823	80.96	19.04	3.2521	3.19211	-0.0599928	11727.5	2791	37.6423	37.5134	-0.128858
SB-249175	Other inhibitors	Other inhibitors	BRCA2	JP9	B7	0.1	12241	2879	80.96	19.04	12.7758	81.1775	18.8225	3.31279	3.2521	-0.0606897	10189.5	2375	0	0	0
SB-250715	Other inhibitors	01:4-pyrimidinyl_ortho-aryl_azoles	BRCA2	JOV	E10	0.1	8910	2220	80.05	19.95	13.1823	80.96	19.04	3.2521	3.01253	-0.23957	11727.5	2791	24.0247	20.4586	-3.56611
SB-251505	Other inhibitors	01:4-pyrimidinyl_ortho-aryl_azoles	BRCA2	todos12	G4	0.1	13687	2498	84.57	15.43	13.0082	83.5075	16.4925	4.06336	4.48088	0.417519	12059.2	2388	0	0	0
SB-251527	Other inhibitors	01:4-pyrimidinyl_ortho-aryl_azoles	BRCA2	JOW	C10	0.1	11506	2817	80.33	19.67	7.45461	88.27	11.73	6.52515	3.08388	-3.44127	6470.5	868	0	0	0
SB-253226	Other inhibitors	01:4-pyrimidinyl_ortho-aryl_azoles	BRCA2	JOQ	E1	0.1	15498	3835	80.16	19.84	9.29991	83.935	16.065	4.22471	3.04032	-1.18439	11915.2	2319.5	0	0	0
SB-253228	Other inhibitors	01:4-pyrimidinyl_ortho-aryl_azoles	BRCA2	JOW	C8	0.1	12657	2926	81.22	18.78	7.45461	88.27	11.73	6.52515	3.32481	-3.20034	6470.5	868	0	0	0
SB-264865	Other inhibitors	01:4-pyrimidinyl_ortho-aryl_azoles	BRCA2	JOW	G9	0.1	10798	2883	78.93	21.07	7.45461	88.27	11.73	6.52515	2.74608	-3.77906	6470.5	868	0	0	0
SB-264866	Other inhibitors	01:4-pyrimidinyl_ortho-aryl_azoles	BRCA2	JOW	H5	0.1	11613	2748	80.86	19.14	7.45461	88.27	11.73	6.52515	3.22466	-3.30049	6470.5	868	0	0	0
SB-278538	Other inhibitors	01:4-pyrimidinyl_ortho-aryl_azoles	BRCA2	JOW	E1	0.1	12889	3167	80.28	19.72	7.45461	88.27	11.73	6.52515	3.07099	-3.45416	6470.5	868	0	0	0
SB-282852	Other inhibitors	Other inhibitors	BRCA2	JP9	D5	0.1	15094	4292	77.86	22.14	12.7758	81.1775	18.8225	3.31279	2.51671	-0.796079	10189.5	2375	0	0	0
SB-282975-A	Other inhibitors	Other inhibitors	BRCA2	JP2	C8	0.1	11253	2773	80.23	19.77	9.18537	83.9525	16.0475	4.2315	3.05817	-1.17333	9657.5	1881	0	0	0
SB-284847-BT	Other inhibitors	01:4-pyrimidinyl_ortho-aryl_azoles	BRCA2	todos12	B6	0.1	12155	2212	84.6	15.4	13.0082	83.5075	16.4925	4.06336	4.49351	0.430144	12059.2	2388	0	7.37018	7.37018
SB-284851-BT	Other inhibitors	Other inhibitors	BRCA2	JPV	H11	0.1	9858	2265	81.32	18.68	15.0119	82.225	17.775	3.62588	3.35332	-0.27256	7174.5	1557.5	0	0	0
SB-284852-BT	Other inhibitors	Other inhibitors	BRCA2	JP9	C3	0.1	13999	3376	80.57	19.43	12.7758	81.1775	18.8225	3.31279	3.14668	-0.16611	10189.5	2375	0	0	0
SB-285234-W	Other inhibitors	01:4-pyrimidinyl_ortho-aryl_azoles	BRCA2	JOV	A5	0.1	9269	2279	80.26	19.74	13.1823	80.96	19.04	3.2521	3.06586	-0.186245	11727.5	2791	20.9635	18.3447	-2.61887
SB-326892	Other inhibitors	4-Amino-5-arylmaleimide	BRCA2	JP9	F9	0.1	14776	4311	77.41	22.59	12.7758	81.1775	18.8225	3.31279	2.42674	-0.886053	10189.5	2375	0	0	0
SB-333612	Other inhibitors	17:Maleimide	BRCA2	JOW	F6	0.1	10718	2432	81.51	18.49	7.45461	88.27	11.73	6.52515	3.40833	-3.11682	6470.5	868	0	0	0
SB-334860	Other inhibitors	Other inhibitors	BRCA2	JP9	E7	0.1	10968	3077	78.09	21.91	12.7758	81.1775	18.8225	3.31279	2.56413	-0.748665	10189.5	2375	0	0	0
SB-334865	Other inhibitors	Other inhibitors	BRCA2	JP9	A7	0.1	9746	2300	80.91	19.09	12.7758	81.1775	18.8225	3.31279	3.23834	-0.0744459	10189.5	2375	4.35252	3.15789	-1.19463
SB-341528	Other inhibitors	Other inhibitors	BRCA2	JP9	E5	0.1	14865	4037	78.64	21.36	12.7758	81.1775	18.8225	3.31279	2.68165	-0.631143	10189.5	2375	0	0	0
SB-341556	Other inhibitors	Other inhibitors	BRCA2	todos12	G7	0.1	11724	2576	81.99	18.01	13.0082	83.5075	16.4925	4.06336	3.55247	-0.510891	12059.2	2388	2.78002	0	-2.78002
SB-342409	Other inhibitors	Other inhibitors	BRCA2	JP9	E1	0.1	12806	3450	78.78	21.22	12.7758	81.1775	18.8225	3.31279	2.71254	-0.600255	10189.5	2375	0	0	0
SB-342411	Other inhibitors	Other inhibitors	BRCA2	JP9	A9	0.1	12552	3037	80.52	19.48	12.7758	81.1775	18.8225	3.31279	3.13347	-0.17932	10189.5	2375	0	0	0
SB-347804	Other inhibitors	23:3-cyano_thiophenes	BRCA2	JOW	B10	0.1	11525	2456	82.43	17.57	7.45461	88.27	11.73	6.52515	3.69152	-2.83363	6470.5	868	0	0	0
SB-358518	Other inhibitors	17:Maleimide	BRCA2	JOV	D3	0.1	13307	3540	78.99	21.01	13.1823	80.96	19.04	3.2521	2.75964	-0.492463	11727.5	2791	0	0	0
SB-360737	Other inhibitors	Other inhibitors	BRCA2	JP9	H8	0.1	12875	3296	79.62	20.38	12.7758	81.1775	18.8225	3.31279	2.90677	-0.406019	10189.5	2375	0	0	0
SB-360741	Other inhibitors	17:Maleimide	BRCA2	JOW	H4	0.1	10806	2690	80.07	19.93	7.45461	88.27	11.73	6.52515	3.01756	-3.50759	6470.5	868	0	0	0
SB-361058	Other inhibitors	17:Maleimide	BRCA2	JOW	B11	0.1	8716	2105	80.55	19.45	7.45461	88.27	11.73	6.52515	3.14139	-3.38376	6470.5	868	0	0	0
SB-373598	Other inhibitors	Other inhibitors	BRCA2	JPA	C5	0.1	6608	1699	79.55	20.45	8.52902	87.135	12.865	5.77303	2.88998	-2.88305	5664.5	851.25	0	0	0
SB-376715	Other inhibitors	Other inhibitors	BRCA2	JPV	F3	0.1	7085	1781	79.91	20.09	15.0119	82.225	17.775	3.62588	2.9776	-0.648278	7174.5	1557.5	1.24747	0	-1.24747
SB-376719	Other inhibitors	17:Maleimide	BRCA2	JOV	D4	0.1	16754	4186	80.01	19.99	13.1823	80.96	19.04	3.2521	3.0025	-0.2496	11727.5	2791	0	0	0
SB-381891	Other inhibitors	Other inhibitors	BRCA2	JPA	F5	0.1	5674	1394	80.28	19.72	8.52902	87.135	12.865	5.77303	3.07099	-2.70203	5664.5	851.25	0	0	0
SB-381904	Other inhibitors	Other inhibitors	BRCA2	JPV	F6	0.1	6719	1844	78.47	21.53	15.0119	82.225	17.775	3.62588	2.64468	-0.981197	7174.5	1557.5	6.34887	0	-6.34887
SB-386023-A	Other inhibitors	Other inhibitors	BRCA2	JP2	B10	0.1	11065	3054	78.37	21.63	9.18537	83.9525	16.0475	4.2315	2.62321	-1.60829	9657.5	1881	0	0	0
SB-390523	Other inhibitors	17:Maleimide	BRCA2	JOQ	B6	0.1	15427	3646	80.88	19.12	9.29991	83.935	16.065	4.22471	3.23013	-0.994587	11915.2	2319.5	0	0	0
SB-390526	Other inhibitors	4-Amino-5-arylmaleimide	BRCA2	JP2	D8	0.1	12706	3281	79.48	20.52	9.18537	83.9525	16.0475	4.2315	2.87329	-1.35821	9657.5	1881	0	0	0
SB-390530	Other inhibitors	Other inhibitors	BRCA2	JP9	H5	0.1	12403	2999	80.53	19.47	12.7758	81.1775	18.8225	3.31279	3.13611	-0.176684	10189.5	2375	0	0	0
SB-390532	Other inhibitors	Other inhibitors	BRCA2	todos12	F9	0.1	8107	1538	84.05	15.95	13.0082	83.5075	16.4925	4.06336	4.26959	0.20623	12059.2	2388	32.7736	35.5946	2.82104
SB-390534	Other inhibitors	Other inhibitors	BRCA2	JP2	E3	0.1	9967	2652	78.98	21.02	9.18537	83.9525	16.0475	4.2315	2.75737	-1.47413	9657.5	1881	0	0	0
SB-390765	Other inhibitors	Other inhibitors	BRCA2	JPA	F6	0.1	6832	1610	80.93	19.07	8.52902	87.135	12.865	5.77303	3.24384	-2.52919	5664.5	851.25	0	0	0
SB-390766	Other inhibitors	Other inhibitors	BRCA2	JP9	D4	0.1	12757	3605	77.97	22.03	12.7758	81.1775	18.8225	3.31279	2.53926	-0.773526	10189.5	2375	0	0	0
SB-390767	Other inhibitors	Other inhibitors	BRCA2	JPV	E6	0.1	7572	1974	79.32	20.68	15.0119	82.225	17.775	3.62588	2.83559	-0.790289	7174.5	1557.5	0	0	0
SB-390770	Other inhibitors	Other inhibitors	BRCA2	JPA	C6	0.1	7765	1932	80.08	19.92	8.52902	87.135	12.865	5.77303	3.02008	-2.75295	5664.5	851.25	0	0	0
SB-404290	Other inhibitors	Other inhibitors	BRCA2	JP9	C4	0.1	12364	3331	78.78	21.22	12.7758	81.1775	18.8225	3.31279	2.71254	-0.600255	10189.5	2375	0	0	0
SB-404321	Other inhibitors	Other inhibitors	BRCA2	todos12	E8	0.1	7516	1544	82.96	17.04	13.0082	83.5075	16.4925	4.06336	3.86854	-0.194818	12059.2	2388	37.6744	35.3434	-2.33102
SB-405367	Other inhibitors	Other inhibitors	BRCA2	todos12	G8	0.1	10180	2084	83.01	16.99	13.0082	83.5075	16.4925	4.06336	3.88582	-0.177547	12059.2	2388	15.5835	12.7303	-2.85316
SB-408010	Other inhibitors	Other inhibitors	BRCA2	JPA	H10	0.1	7301	1703	81.09	18.91	8.52902	87.135	12.865	5.77303	3.28821	-2.48482	5664.5	851.25	0	0	0
SB-409513	Other inhibitors	17:Maleimide	BRCA2	JOW	E10	0.1	2	1	66.67	33.33	7.45461	88.27	11.73	6.52515	1.0003	-5.52485	6470.5	868	99.9691	99.8848	-0.0842979
SB-409514	Other inhibitors	17:Maleimide	BRCA2	JOQ	G2	0.1	17162	4074	80.82	19.18	9.29991	83.935	16.065	4.22471	3.21376	-1.01095	11915.2	2319.5	0	0	0
SB-428218-A	Other inhibitors	Other inhibitors	BRCA2	JP9	F6	0.1	11961	3141	79.2	20.8	12.7758	81.1775	18.8225	3.31279	2.80769	-0.505098	10189.5	2375	0	0	0
SB-431533	Other inhibitors	21:2-pyridinyl_imidazoles_and_related	BRCA2	JOQ	B2	0.1	21598	4980	81.26	18.74	9.29991	83.935	16.065	4.22471	3.33618	-0.888533	11915.2	2319.5	0	0	0
SB-431542-A	Other inhibitors	21:2-pyridinyl_imidazoles_and_related	BRCA2	JOW	D8	0.1	12040	3406	77.95	22.05	7.45461	88.27	11.73	6.52515	2.53515	-3.99	6470.5	868	0	0	0
SB-437013	Other inhibitors	06:4-pyridyl_ortho-aryl_azoles	BRCA2	JOV	F4	0.1	8073	2004	80.11	19.89	13.1823	80.96	19.04	3.2521	3.02765	-0.224449	11727.5	2791	31.1618	28.1978	-2.96402
SB-477794-R	Other inhibitors	Other inhibitors	BRCA2	JPA	C4	0.1	8631	2259	79.26	20.74	8.52902	87.135	12.865	5.77303	2.8216	-2.95143	5664.5	851.25	0	0	0
SB-517389	Other inhibitors	Other inhibitors	BRCA2	JPV	H2	0.1	8809	2105	80.71	19.29	15.0119	82.225	17.775	3.62588	3.18403	-0.441846	7174.5	1557.5	0	0	0
SB-548492	Other inhibitors	Other inhibitors	BRCA2	JPV	C3	0.1	10859	2430	81.71	18.29	15.0119	82.225	17.775	3.62588	3.46747	-0.15841	7174.5	1557.5	0	0	0
SB-589132	Other inhibitors	Other inhibitors	BRCA2	todos12	D8	0.1	11093	2556	81.27	18.73	13.0082	83.5075	16.4925	4.06336	3.33903	-0.724334	12059.2	2388	8.01252	0	-8.01252
SB-590885-AAE	Other inhibitors	Other inhibitors	BRCA2	JOW	F4	0.1	11120	3058	78.43	21.57	7.45461	88.27	11.73	6.52515	2.63607	-3.88908	6470.5	868	0	0	0
SB-601436	Other inhibitors	Other inhibitors	BRCA2	JP9	H10	0.1	12991	3393	79.29	20.71	12.7758	81.1775	18.8225	3.31279	2.82859	-0.484205	10189.5	2375	0	0	0
SB-610250	Other inhibitors	Other inhibitors	BRCA2	JPG	C2	0.1	17862	3586	83.28	16.72	16.6645	80.945	19.055	3.24797	3.98086	0.732895	12938	3047	0	0	0
SB-610251-B	Other inhibitors	06:4-pyridyl_ortho-aryl_azoles	BRCA2	JOV	E7	0.1	10462	2608	80.05	19.95	13.1823	80.96	19.04	3.2521	3.01253	-0.23957	11727.5	2791	10.7909	6.55679	-4.23409
SB-614067-R	Other inhibitors	06:4-pyridyl_ortho-aryl_azoles	BRCA2	JOW	E5	0.1	14517	3766	79.4	20.6	7.45461	88.27	11.73	6.52515	2.85437	-3.67078	6470.5	868	0	0	0
SB-633825	Other inhibitors	06:4-pyridyl_ortho-aryl_azoles	BRCA2	JOQ	D3	0.1	9692	2250	81.16	18.84	9.29991	83.935	16.065	4.22471	3.30786	-0.916856	11915.2	2319.5	18.6589	2.99634	-15.6625
SB-642057	Other inhibitors	Other inhibitors	BRCA2	JPV	H7	0.1	6910	1748	79.81	20.19	15.0119	82.225	17.775	3.62588	2.95295	-0.672932	7174.5	1557.5	3.68667	0	-3.68667
SB-642124-AAA	Other inhibitors	Other inhibitors	BRCA2	JPA	D8	0.1	9459	2328	80.25	19.75	8.52902	87.135	12.865	5.77303	3.06329	-2.70974	5664.5	851.25	0	0	0
SB-660566	Other inhibitors	Other inhibitors	BRCA2	JP9	G9	0.1	11689	3168	78.68	21.32	12.7758	81.1775	18.8225	3.31279	2.69043	-0.622359	10189.5	2375	0	0	0
SB-675259-M	Other inhibitors	26:3-amino_pyrazolopyridazines	BRCA2	todos12	A4	0.1	15453	2340	86.85	13.15	13.0082	83.5075	16.4925	4.06336	5.60456	1.5412	12059.2	2388	0	2.01005	2.01005
SB-682330-A	Other inhibitors	06:4-pyridyl_ortho-aryl_azoles	BRCA2	JOQ	B7	0.1	18805	5628	76.97	23.03	9.29991	83.935	16.065	4.22471	2.34216	-1.88255	11915.2	2319.5	0	0	0
SB-686709-A	Other inhibitors	26:3-amino_pyrazolopyridazines	BRCA2	JOQ	F4	0.1	17576	2522	87.45	12.55	9.29991	83.935	16.065	4.22471	5.96813	1.74342	11915.2	2319.5	0	0	0
SB-693162	Other inhibitors	Other inhibitors	BRCA2	JOV	D6	0.1	15619	3520	81.61	18.39	13.1823	80.96	19.04	3.2521	3.43774	0.185637	11727.5	2791	0	0	0
SB-693162	Other inhibitors	Other inhibitors	BRCA2	JP9	C10	0.1	12662	3693	77.42	22.58	12.7758	81.1775	18.8225	3.31279	2.4287	-0.884093	10189.5	2375	0	0	0
SB-693578	Other inhibitors	Other inhibitors	BRCA2	JP9	B11	0.1	10831	3010	78.25	21.75	12.7758	81.1775	18.8225	3.31279	2.5977	-0.715089	10189.5	2375	0	0	0
SB-707548-A	Other inhibitors	Other inhibitors	BRCA2	JOQ	A10	0.1	13193	2258	85.39	14.61	9.29991	83.935	16.065	4.22471	4.84463	0.619915	11915.2	2319.5	0	2.65143	2.65143
SB-707548-A	Other inhibitors	Other inhibitors	BRCA2	JP2	F7	0.1	9575	2065	82.26	17.74	9.18537	83.9525	16.0475	4.2315	3.63698	-0.594522	9657.5	1881	0.854258	0	-0.854258
SB-708998	Other inhibitors	Other inhibitors	BRCA2	JP9	G5	0.1	13508	3503	79.41	20.59	12.7758	81.1775	18.8225	3.31279	2.85673	-0.456064	10189.5	2375	0	0	0
SB-708999	Other inhibitors	Other inhibitors	BRCA2	JPV	G11	0.1	9141	2642	77.58	22.42	15.0119	82.225	17.775	3.62588	2.4603	-1.16558	7174.5	1557.5	0	0	0
SB-710363	Other inhibitors	Other inhibitors	BRCA2	JPV	B2	0.1	9816	2392	80.41	19.59	15.0119	82.225	17.775	3.62588	3.10465	-0.521234	7174.5	1557.5	0	0	0
SB-710397-B	Other inhibitors	Other inhibitors	BRCA2	JP9	A3	0.1	11832	3213	78.64	21.36	12.7758	81.1775	18.8225	3.31279	2.68165	-0.631143	10189.5	2375	0	0	0
SB-710903	Other inhibitors	Other inhibitors	BRCA2	JPA	C7	0.1	7651	2192	77.73	22.27	8.52902	87.135	12.865	5.77303	2.49035	-3.28268	5664.5	851.25	0	0	0
SB-711237	Other inhibitors	20:3-amino_pyrazolopyridines	BRCA2	JOW	A11	0.1	8678	1832	82.57	17.43	7.45461	88.27	11.73	6.52515	3.73723	-2.78791	6470.5	868	0	0	0
SB-711239	Other inhibitors	Other inhibitors	BRCA2	JP9	A8	0.1	12442	3689	77.13	22.87	12.7758	81.1775	18.8225	3.31279	2.37254	-0.94025	10189.5	2375	0	0	0
SB-711880	Other inhibitors	Other inhibitors	BRCA2	JPA	G11	0.1	10069	2449	80.44	19.56	8.52902	87.135	12.865	5.77303	3.11247	-2.66055	5664.5	851.25	0	0	0
SB-731254-M	Other inhibitors	Other inhibitors	BRCA2	JPV	G2	0.1	8739	1974	81.57	18.43	15.0119	82.225	17.775	3.62588	3.42594	-0.199943	7174.5	1557.5	0	0	0
SB-731284	Other inhibitors	Other inhibitors	BRCA2	JPA	H5	0.1	7165	1622	81.54	18.46	8.52902	87.135	12.865	5.77303	3.41712	-2.35591	5664.5	851.25	0	0	0
SB-731579	Other inhibitors	Other inhibitors	BRCA2	todos12	A9	0.1	11663	2636	81.57	18.43	13.0082	83.5075	16.4925	4.06336	3.42594	-0.637426	12059.2	2388	3.28586	0	-3.28586
SB-732881	Other inhibitors	20:3-amino_pyrazolopyridines	BRCA2	JOQ	C4	0.1	18743	3378	84.73	15.27	9.29991	83.935	16.065	4.22471	4.54879	0.324076	11915.2	2319.5	0	0	0
SB-732932	Other inhibitors	Other inhibitors	BRCA2	JPA	A1	0.1	9935	2290	81.27	18.73	8.52902	87.135	12.865	5.77303	3.33903	-2.434	5664.5	851.25	0	0	0
SB-733371	Other inhibitors	Other inhibitors	BRCA2	JPV	C7	0.1	6979	1767	79.8	20.2	15.0119	82.225	17.775	3.62588	2.9505	-0.675384	7174.5	1557.5	2.72493	0	-2.72493
SB-733416	Other inhibitors	Other inhibitors	BRCA2	JPV	H10	0.1	8055	1731	82.31	17.69	15.0119	82.225	17.775	3.62588	3.65291	0.0270322	7174.5	1557.5	0	0	0
SB-733887	Other inhibitors	Other inhibitors	BRCA2	todos12	B9	0.1	10899	2163	83.44	16.56	13.0082	83.5075	16.4925	4.06336	4.03865	-0.0247148	12059.2	2388	9.62125	9.42211	-0.199135
SB-733894	Other inhibitors	Other inhibitors	BRCA2	JP9	C1	0.1	14638	3566	80.41	19.59	12.7758	81.1775	18.8225	3.31279	3.10465	-0.208145	10189.5	2375	0	0	0
SB-734117	Other inhibitors	03:Furazan_benzimidazoles	BRCA2	JOQ	B10	0.1	12070	2416	83.32	16.68	9.29991	83.935	16.065	4.22471	3.9952	-0.229508	11915.2	2319.5	0	0	0
SB-734909	Other inhibitors	Other inhibitors	BRCA2	JPV	B6	0.1	8746	2464	78.02	21.98	15.0119	82.225	17.775	3.62588	2.54959	-1.07629	7174.5	1557.5	0	0	0
SB-735216	Other inhibitors	Other inhibitors	BRCA2	JP2	C5	0.1	11858	3163	78.94	21.06	9.18537	83.9525	16.0475	4.2315	2.74834	-1.48316	9657.5	1881	0	0	0
SB-735464	Other inhibitors	Other inhibitors	BRCA2	JPV	D8	0.1	8297	2203	79.02	20.98	15.0119	82.225	17.775	3.62588	2.76644	-0.859435	7174.5	1557.5	0	0	0
SB-735465	Other inhibitors	19:Indazole-3-carboxamides	BRCA2	JOV	F3	0.1	6716	1556	81.19	18.81	13.1823	80.96	19.04	3.2521	3.31632	0.0642203	11727.5	2791	42.7329	44.2494	1.51648
SB-735467	Other inhibitors	19:Indazole-3-carboxamides	BRCA2	JOV	E9	0.1	8209	2456	76.97	23.03	13.1823	80.96	19.04	3.2521	2.34216	-0.909938	11727.5	2791	30.0021	12.0029	-17.9993
SB-736290	Other inhibitors	03:Furazan_benzimidazoles	BRCA2	JOW	C7	0.1	10674	2484	81.12	18.88	7.45461	88.27	11.73	6.52515	3.29661	-3.22854	6470.5	868	0	0	0
SB-736302	Other inhibitors	03:Furazan_benzimidazoles	BRCA2	JOV	B1	0.1	16149	4018	80.08	19.92	13.1823	80.96	19.04	3.2521	3.02008	-0.232021	11727.5	2791	0	0	0
SB-736302	Other inhibitors	03:Furazan_benzimidazoles	BRCA2	JOV	B1	0.1	16149	4018	80.08	19.92	13.1823	80.96	19.04	3.2521	3.02008	-0.232021	11727.5	2791	0	0	0
SB-736715	Other inhibitors	Other inhibitors	BRCA2	JP2	B3	0.1	9941	2359	80.82	19.18	9.18537	83.9525	16.0475	4.2315	3.21376	-1.01774	9657.5	1881	0	0	0
SB-737198	Other inhibitors	03:Furazan_benzimidazoles	BRCA2	todos12	F4	0.1	10378	1886	84.62	15.38	13.0082	83.5075	16.4925	4.06336	4.50195	0.438588	12059.2	2388	13.9416	21.0218	7.0802
SB-737447	Other inhibitors	Other inhibitors	BRCA2	JP2	G3	0.1	10383	2649	79.67	20.33	9.18537	83.9525	16.0475	4.2315	2.91884	-1.31266	9657.5	1881	0	0	0
SB-738004	Other inhibitors	aminofurazan	BRCA2	JP9	A2	0.1	11763	2649	81.62	18.38	12.7758	81.1775	18.8225	3.31279	3.4407	0.127906	10189.5	2375	0	0	0
SB-738482	Other inhibitors	19:Indazole-3-carboxamides	BRCA2	JOW	C9	0.1	9721	2523	79.39	20.61	7.45461	88.27	11.73	6.52515	2.85201	-3.67314	6470.5	868	0	0	0
SB-738561	Other inhibitors	03:Furazan_benzimidazoles	BRCA2	JOW	H2	0.1	10872	2398	81.93	18.07	7.45461	88.27	11.73	6.52515	3.53403	-2.99111	6470.5	868	0	0	0
SB-739245-AC	Other inhibitors	20:3-amino_pyrazolopyridines	BRCA2	JOW	D11	0.1	10141	2470	80.41	19.59	7.45461	88.27	11.73	6.52515	3.10465	-3.4205	6470.5	868	0	0	0
SB-739452	Other inhibitors	20:3-amino_pyrazolopyridines	BRCA2	JOQ	G6	0.1	12018	2923	80.44	19.56	9.29991	83.935	16.065	4.22471	3.11247	-1.11224	11915.2	2319.5	0	0	0
SB-742034-AC	Other inhibitors	Other inhibitors	BRCA2	JPA	A11	0.1	6021	1426	80.85	19.15	8.52902	87.135	12.865	5.77303	3.22193	-2.5511	5664.5	851.25	0	0	0
SB-742251	Other inhibitors	Other inhibitors	BRCA2	JPV	G3	0.1	6742	1729	79.59	20.41	15.0119	82.225	17.775	3.62588	2.89956	-0.72632	7174.5	1557.5	6.02829	0	-6.02829
SB-742352-AC	Other inhibitors	Other inhibitors	BRCA2	JPG	C3	0.1	15020	3678	80.33	19.67	16.6645	80.945	19.055	3.24797	3.08388	-0.164082	12938	3047	0	0	0
SB-742609	Other inhibitors	Other inhibitors	BRCA2	JPA	B11	0.1	7586	1682	81.85	18.15	8.52902	87.135	12.865	5.77303	3.50964	-2.26339	5664.5	851.25	0	0	0
SB-742864	Other inhibitors	19:Indazole-3-carboxamides	BRCA2	JOV	G5	0.1	6445	1755	78.6	21.4	13.1823	80.96	19.04	3.2521	2.6729	-0.579204	11727.5	2791	45.0437	37.1193	-7.92439
SB-742865	Other inhibitors	19:Indazole-3-carboxamides	BRCA2	JOV	H4	0.1	10414	2420	81.14	18.86	13.1823	80.96	19.04	3.2521	3.30223	0.0501261	11727.5	2791	11.2002	13.2927	2.09256
SB-743341	Other inhibitors	Other inhibitors	BRCA2	JPA	E11	0.1	7660	2187	77.79	22.21	8.52902	87.135	12.865	5.77303	2.50248	-3.27055	5664.5	851.25	0	0	0
SB-744941	Other inhibitors	03:Furazan_benzimidazoles	BRCA2	JOW	G1	0.1	12214	2753	81.61	18.39	7.45461	88.27	11.73	6.52515	3.43774	-3.08741	6470.5	868	0	0	0
SB-747651-A	Other inhibitors	Other inhibitors	BRCA2	JPA	D4	0.1	7839	1954	80.05	19.95	8.52902	87.135	12.865	5.77303	3.01253	-2.7605	5664.5	851.25	0	0	0
SB-751148	Other inhibitors	03:Furazan_benzimidazoles	BRCA2	JOV	F10	0.1	7515	1873	80.05	19.95	13.1823	80.96	19.04	3.2521	3.01253	-0.23957	11727.5	2791	35.9198	32.8914	-3.02841
SB-751399	Other inhibitors	03:Furazan_benzimidazoles	BRCA2	JOQ	F9	0.1	11164	2632	80.92	19.08	9.29991	83.935	16.065	4.22471	3.24109	-0.983622	11915.2	2319.5	6.30495	0	-6.30495
SB-759335-B	Other inhibitors	03:Furazan_benzimidazoles	BRCA2	JOV	C8	0.1	13875	2836	83.03	16.97	13.1823	80.96	19.04	3.2521	3.89275	0.640651	11727.5	2791	0	0	0
SB-772077-B	ROCK inhibitors	03:Furazan_benzimidazoles	BRCA2	JOQ	D10	0.1	15071	3282	82.12	17.88	9.29991	83.935	16.065	4.22471	3.59284	-0.631871	11915.2	2319.5	0	0	0
SB-814597	Other inhibitors	23:3-cyano_thiophenes	BRCA2	JOV	G9	0.1	8040	1943	80.54	19.46	13.1823	80.96	19.04	3.2521	3.13875	-0.113355	11727.5	2791	31.4432	30.3834	-1.05981
SKF-104493-B2	Other inhibitors	Other inhibitors	BRCA2	JP9	D8	0.1	15481	4260	78.42	21.58	12.7758	81.1775	18.8225	3.31279	2.63392	-0.67887	10189.5	2375	0	0	0
SKF-105561	Other inhibitors	Other inhibitors	BRCA2	JPV	C11	0.1	10035	2379	80.84	19.16	15.0119	82.225	17.775	3.62588	3.21921	-0.406672	7174.5	1557.5	0	0	0
SKF-105942	Other inhibitors	Other inhibitors	BRCA2	JP2	A3	0.1	10899	2308	82.52	17.48	9.18537	83.9525	16.0475	4.2315	3.72082	-0.510676	9657.5	1881	0	0	0
SKF-106164-A2	Other inhibitors	Other inhibitors	BRCA2	JP9	E4	0.1	11510	2968	79.5	20.5	12.7758	81.1775	18.8225	3.31279	2.87805	-0.434742	10189.5	2375	0	0	0
SKF-12778	Other inhibitors	Other inhibitors	BRCA2	JPV	C8	0.1	11314	2653	81.01	18.99	15.0119	82.225	17.775	3.62588	3.26593	-0.35995	7174.5	1557.5	0	0	0
SKF-18267	Other inhibitors	Other inhibitors	BRCA2	JP2	G2	0.1	10315	2399	81.13	18.87	9.18537	83.9525	16.0475	4.2315	3.29942	-0.932083	9657.5	1881	0	0	0
SKF-18355	Other inhibitors	Other inhibitors	BRCA2	JPA	D1	0.1	9295	2346	79.85	20.15	8.52902	87.135	12.865	5.77303	2.96278	-2.81025	5664.5	851.25	0	0	0
SKF-31736	Other inhibitors	Other inhibitors	BRCA2	JP9	H2	0.1	12254	2753	81.66	18.34	12.7758	81.1775	18.8225	3.31279	3.45256	0.139772	10189.5	2375	0	0	0
SKF-62604	Other inhibitors	17:Maleimide	BRCA2	todos12	D4	0.1	12473	2590	82.81	17.19	13.0082	83.5075	16.4925	4.06336	3.81734	-0.246026	12059.2	2388	0	0	0
SKF-86002	Other inhibitors	Other inhibitors	BRCA2	todos12	A1	0.1	12982	2337	84.74	15.26	13.0082	83.5075	16.4925	4.06336	4.55308	0.489718	12059.2	2388	0	2.13568	2.13568
SKF-86055	Other inhibitors	06:4-pyridyl_ortho-aryl_azoles	BRCA2	JOW	C6	0.1	9518	1889	83.44	16.56	7.45461	88.27	11.73	6.52515	4.03865	-2.4865	6470.5	868	0	0	0
SKF-96418	Other inhibitors	Other inhibitors	BRCA2	JP2	A8	0.1	9835	2280	81.18	18.82	9.18537	83.9525	16.0475	4.2315	3.3135	-0.918004	9657.5	1881	0	0	0
SKF-97184	Other inhibitors	Other inhibitors	BRCA2	JP2	B5	0.1	11291	2526	81.72	18.28	9.18537	83.9525	16.0475	4.2315	3.47046	-0.761041	9657.5	1881	0	0	0
SKF-97236	Other inhibitors	Other inhibitors	BRCA2	JPG	F3	0.1	11606	2500	82.28	17.72	16.6645	80.945	19.055	3.24797	3.64334	0.395374	12938	3047	10.2953	17.9521	7.65683
SKF-97255	Other inhibitors	Other inhibitors	BRCA2	JPV	E10	0.1	7700	2028	79.15	20.85	15.0119	82.225	17.775	3.62588	2.79616	-0.829716	7174.5	1557.5	0	0	0
SKF-97263	Other inhibitors	Other inhibitors	BRCA2	JP9	B6	0.1	12417	3320	78.9	21.1	12.7758	81.1775	18.8225	3.31279	2.73934	-0.573454	10189.5	2375	0	0	0
SKF-97293	Other inhibitors	Other inhibitors	BRCA2	JPV	B8	0.1	9169	2333	79.72	20.28	15.0119	82.225	17.775	3.62588	2.93097	-0.694913	7174.5	1557.5	0	0	0
SKF-97359	Other inhibitors	Other inhibitors	BRCA2	todos12	E7	0.1	8917	1839	82.9	17.1	13.0082	83.5075	16.4925	4.06336	3.84795	-0.215409	12059.2	2388	26.0568	22.9899	-3.06681
SKF-97416	Other inhibitors	Other inhibitors	BRCA2	JPV	A7	0.1	7171	1698	80.85	19.15	15.0119	82.225	17.775	3.62588	3.22193	-0.403947	7174.5	1557.5	0.0487839	0	-0.0487839
SKF-97510	Other inhibitors	Other inhibitors	BRCA2	JPA	H7	0.1	6415	1635	79.69	20.31	8.52902	87.135	12.865	5.77303	2.92368	-2.84934	5664.5	851.25	0	0	0
SKF-97560	Other inhibitors	Other inhibitors	BRCA2	JP9	H6	0.1	10334	2378	81.29	18.71	12.7758	81.1775	18.8225	3.31279	3.34474	0.0319449	10189.5	2375	0	0	0
SKF-97620	Other inhibitors	Other inhibitors	BRCA2	JP9	A1	0.1	12361	3046	80.23	19.77	12.7758	81.1775	18.8225	3.31279	3.05817	-0.254622	10189.5	2375	0	0	0
SKF-97623	Other inhibitors	Other inhibitors	BRCA2	JP2	H7	0.1	7281	1796	80.21	19.79	9.18537	83.9525	16.0475	4.2315	3.05306	-1.17844	9657.5	1881	24.6078	4.51887	-20.0889

## Sheet: Figure 1 F
Relative cell number (%)
Relative cell number (%) of shScramble and shBRCA2 HCT116p21-/- cells at different ROCK inhibitors
Rock P8 JPA (H9) GSK534913A	#1 Rock P8 JPA (H9) GSK534913A	shScramble	shBRCA2
	0.25	62.2236	39.9163
	0.5	44.3038	22.2473
	1	47.7744	8.59594
	2	17.9287	2.01716
#2	#2 Rock P3 JOQ (F8) GSK248233B	shSCR	shBRCA2
Rock P3 JOQ (F8) GSK248233B	2	48.0555	4.7227
Rock P3 JOQ (F8) GSK248233B	0.7	49.4151	5.14876
Rock P3 JOQ (F8) GSK248233B	0.2	56.1484	11.7779
Rock P3 JOQ (F8) GSK248233B	0.07	100	40.0491
#3	#3 Rock p6 JOW (D2) GSK269962B	shSCR	shBRCA2
Rock p6 JOW (D2) GSK269962B	2	47.5713	5.93588
Rock p6 JOW (D2) GSK269962B	0.7	51.5623	6.28972
Rock p6 JOW (D2) GSK269962B	0.2	69.7027	13.6843
Rock p6 JOW (D2) GSK269962B	0.07	89.8212	33.3911
