# Supplementary material for: Inhibitors of Rho kinases (ROCK) induce multiple mitotic defects and synthetic lethality in BRCA2-deficient cells
Source: eLife journal article supplement (doi:10.7554/elife.80254), 2023-04-19
Supplement: supp [file Figure 2- figure supplement 1- source data 1.xlsx]

## Sheet: Figure 2- figure supplement 1 B
Surviving percentages of Fasudil-treated shScramble and shBRCA2 HCT116 p21-/- cells
exp1
dilucion	BRCA2
BRCA2 NT	Well 1	Well 2		Well 3		Promedio
1	0	70		73		71.5	100
2	0	63		48		55.5	100
3		28		38		33
BRCA2 Fasudil	Well 1	Well 2		Well 3
1		15	20.979	19	26.5734	17	23.7762
2		14	25.2252	15	27.027	14.5	26.1261
3	11	9	27.2727	14	42.4242	11.5	34.8485
SCR NT	Well 1	Well 2		Well 3
1	0	76		78		77	100
2	0	44		52		48	100
3	25	26		21		24
SCR Fasudil	Well 1	Well 2		Well 3
1		55	71.4286	59	76.6234	57	74.026
2		30	62.5	35	72.9167	32.5	67.7083
3		19	79.1667	27	112.5	23	95.8333
exp2
dilucion	BRCA2
BRCA2 NT	Well 1	Well 2		Well 3		Promedio
1	89	91		80		86.6667	100
2	73	61		68		67.3333	100
3	41	45		49		45
BRCA2 Fasudil	Well 1	Well 2		Well 3
1	26	28		25		26.3333	30.3846
2	18	19		24		20.3333	30.198
3	15	12		23		16.6667	37.037
SCR NT	Well 1	Well 2		Well 3
1	86	101		99		95.3333	100
2	76	89		71		78.6667	100
3	43	46		39		42.6667	100
SCR Fasudil	Well 1	Well 2		Well 3
1	79	85		75		79.6667	83.5664
2	65	59		69		64.3333	81.7797
3	55	48		47		50	117.188
