# Supplementary material for: Inhibitors of Rho kinases (ROCK) induce multiple mitotic defects and synthetic lethality in BRCA2-deficient cells
Source: eLife journal article supplement (doi:10.7554/elife.80254), 2023-04-19
Supplement: supp [file Figure 2- figure supplement 2- source data 1.xlsx]

## Sheet: Figure 2-figure supplement 2 A
Relative cell number (%) of V-C8#13 and V-C8 cells after 6 days of treatment with Ripasudil
		VC8#13								VC8
	NT	B - 2	24798	26510.7	93.5397	100	6.01978			E - 2	17150	18088.7	94.8107	100	9.63672
		C - 2	26778		101.008					F - 2	20100		111.119
		D - 2	27956		105.452					G - 2	17016		94.07
	Ola 0.5 uM	B - 3	27184		102.54	104.103	4.0733			E - 3	18		0.0995098	0.914016	1.3443
		C - 3	26787		101.042					F - 3	446		2.46563
		D - 3	28824		108.726					G - 3	32		0.176906
Fasudil	8	B - 4	22562		85.1054	92.4521	8.20267			E - 4	17078		94.4127	97.7702	2.90773
		C - 4	26856		101.303					F - 4	17987		99.438
		D - 4	24111		90.9483					G - 4	17991		99.4601
	16	B - 5	26435		99.7146	100.146	0.412629			E - 5	17974		99.3661	88.6467	9.28379
		C - 5	26653		100.537					F - 5	15048		83.1902
		D - 5	26560		100.186					G - 5	15083		83.3837
	32	B - 6	23141		87.2894	86.838	0.516516			E - 6	10666		58.9651	58.1948	1.05139
		C - 6	22872		86.2747					F - 6	10604		58.6223
		D - 6	23051		86.9499					G - 6	10310		56.997
	64	B - 7	11965		45.1328	41.328	3.41217			E - 7	2528		13.9756	12.0573	4.35147
		C - 7	10687		40.3121					F - 7	2735		15.12
		D - 7	10217		38.5392					G - 7	1280		7.07625
Ripasudil	4	B - 8	23559		88.8661	91.9806	2.94962			E - 8	17501		96.7512	102.28	5.11955
		C - 8	24481		92.344					F - 8	18673		103.23
		D - 8	25114		94.7317					G - 8	19329		106.857
	8	B - 9	26592		100.307	98.1693	2.24985			E - 9	15945		88.1491	82.208	5.15412
		C - 9	26081		98.3793					F - 9	14388		79.5415
		D - 9	25403		95.8218					G - 9	14278		78.9334
	16	B - 10	22054		83.1892	87.4931	4.64424			E - 10	9307		51.4521	45.1664	5.52178
		C - 10	24500		92.4156					F - 10	7434		41.0976
		D - 10	23031		86.8745					G - 10	7769		42.9495
	32	B - 11	8557		32.2776	39.7576	8.3708			E - 11	482		2.66465	2.94844	0.950041
		C - 11	12937		48.7992					F - 11	725		4.00803
		D - 11	10126		38.1959					G - 11	393		2.17263
			#13			B2
		NT	100	6.01978		100	9.63672
		Olaparib 0.5 uM	104.103	4.0733		0.914016	1.3443
		Fasudil 8 uM	92.4521	8.20267		97.7702	2.90773
		16	100.146	0.412629		88.6467	9.28379
		32	86.838	0.516516		58.1948	1.05139
		64	41.328	3.41217		12.0573	4.35147
		Ripasudil 4 uM	91.9806	2.94962		102.28	5.11955
		8	98.1693	2.24985		82.208	5.15412
		16	87.4931	4.64424		45.1664	5.52178
		32	39.7576	8.3708		2.94844	0.950041

## Sheet: Figure 2-figure supplement 2 B
Relative cell number (%) of PEO4 and PEO1 cells after 6 days of treatment with Ripasudil
			PEO4							PEO1
	Control	B - 2	8901	8548.33	104.126	100	3.67622			E - 2	13856	11514.3	120.337	100	18.5555
		C - 2	8298		97.0716					F - 2	11016		95.6721
		D - 2	8446		98.8029					G - 2	9671		83.991
Ripa	32	B - 3	8306		97.1651	84.457	11.6005			E - 3	1894		16.4491	13.5483	3.20948
		C - 3	6363		74.4356					F - 3	1623		14.0955
		D - 3	6990		81.7703					G - 3	1163		10.1005
	64	B - 4	7340		85.8647	69.6276	14.4303			E - 4	722		6.27045	5.2688	0.878514
		C - 4	4981		58.2687					F - 4	565		4.90693
		D - 4	5535		64.7495					G - 4	533		4.62901
	96	B - 5	1277		14.9386	14.9425	1.71379			E - 5	265		2.30148	2.74441	0.390624
		C - 5	1424		16.6582					F - 5	333		2.89205
		D - 5	1131		13.2306					G - 5	350		3.03969
	128	B - 6	1113		13.0201	18.2531	6.21851			E - 6	360		3.12654	2.53307	0.519229
		C - 6	2148		25.1277					F - 6	249		2.16252
		D - 6	1420		16.6114					G - 6	266		2.31016
Ola	2.5	B - 7	3548		41.5052	39.8479	3.22103			E - 7	8155		70.8248	76.1167	6.30156
		C - 7	3582		41.9029					F - 7	9567		83.0877
		D - 7	3089		36.1357					G - 7	8571		74.4377
	5	B - 8	1601		18.7288	19.7543	1.17299			E - 8	4980		43.2504	41.5135	4.02605
		C - 8	1667		19.5009					F - 8	5110		44.3795
		D - 8	1798		21.0333					G - 8	4250		36.9105
	7.5	B - 9	860		10.0604	12.6496	2.42529			E - 9	2213		19.2195	18.9184	1.61914
		C - 9	1113		13.0201					F - 9	2345		20.3659
		D - 9	1271		14.8684					G - 9	1977		17.1699
	10	B - 10	903		10.5635	6.19614	5.42116			E - 10	575		4.99378	4.97351	0.760125
		C - 10	675		7.89628					F - 10	659		5.7233
		D - 10	11		0.12868					G - 10	484		4.20346
Olaparib looks weird
			Control	100	3.67622			100	18.5555
			Ripa 32	84.457	11.6005			13.5483	3.20948
			64	69.6276	14.4303			5.2688	0.878514
			96	14.9425	1.71379			2.74441	0.390624
			128	18.2531	6.21851			2.53307	0.519229
			Ola 2.5	39.8479	3.22103			76.1167	6.30156
			5	19.7543	1.17299			41.5135	4.02605
			7.5	12.6496	2.42529			18.9184	1.61914
			10	6.19614	5.42116			4.97351	0.760125
exp 2
	Control	B - 2	9031	9109	99.1437	100	2.7477		E - 2	11468	11174	102.631	100	3.8373
		C - 2	9389		103.074				F - 2	11372		101.772
		D - 2	8907		97.7824				G - 2	10682		95.5969
Ripasudil	8	B - 3	13098		143.792	143.803	6.83391		E - 3	15067		134.84	128.492	11.0883
		C - 3	13722		150.642				F - 3	15079		134.947
		D - 3	12477		136.974				G - 3	12927		115.688
	16	B - 4	12564		137.93	135.086	10.2518		E - 4	12623		112.968	105.602	9.35392
		C - 4	13082		143.616				F - 4	12153		108.761
		D - 4	11269		123.713				G - 4	10624		95.0779
	32	B - 5	14106		154.858	138.804	13.9183		E - 5	5833		52.2015	49.3765	8.91141
		C - 5	11972		131.43				F - 5	6317		56.533
		D - 5	11853		130.124				G - 5	4402		39.395
	64	B - 6	12106		132.902	123.757	8.4314		E - 6	636		5.69178	4.32552	1.19414
		C - 6	11120		122.077				F - 6	425		3.80347
		D - 6	10593		116.292				G - 6	389		3.4813
	96	B - 7	7247		79.5587	71.4531	7.24545		E - 7	250		2.23734	2.473	0.512254
		C - 7	6303		69.1953				F - 7	237		2.121
		D - 7	5976		65.6054				G - 7	342		3.06068
	128	B - 8	1267		13.9093	13.902	0.395264		E - 8	211		1.88831	1.52437	0.339171
		C - 8	1230		13.5031				F - 8	164		1.46769
		D - 8	1302		14.2936				G - 8	136		1.21711
Fasudil	128	B - 9	7490		82.2264	82.1056	4.18947		E - 9	256		2.29103	1.99869	0.304979
		C - 9	7855		86.2334				F - 9	226		2.02255
		D - 9	7092		77.8571				G - 9	188		1.68248
	PEO4							PEO1
	Well	Cell #	AVG	Survival	Avg Surv	StDev		Well	Cell #	AVG	Survival	Avg Surv	StDev
Control	B - 2	15140	14717	102.874	100	3.15165		E - 2	21321	21226.3	100.446	100	5.2436
	C - 2	14790		100.496				F - 2	22289		105.006
	D - 2	14221		96.6297				G - 2	20069		94.5477
2 uM	B - 3	14946	15260.7	101.556	103.694	4.83301		E - 3	21805	22110.3	102.726	104.165	4.60034
	C - 3	16075		109.227				F - 3	21323		100.455
	D - 3	14761		100.299				G - 3	23203		109.312
4 uM	B - 4	13672	14019	92.8994	95.2572	6.74123		E - 4	21145	20961.3	99.6168	98.7516	4.46587
	C - 4	13247		90.0116				F - 4	21804		102.721
	D - 4	15138		102.861				G - 4	19935		93.9164
8 uM	B - 5	14401	13939	97.8528	94.7136	3.46852		E - 5	18555	17923.3	87.415	84.4391	2.78219
	C - 5	14025		95.298				F - 5	17385		81.903
	D - 5	13391		90.99				G - 5	17830		83.9994
16 uM	B - 6	12487	12229	84.8475	83.0944	4.77326		E - 6	14380	12956.3	67.746	61.039	7.63708
	C - 6	11434		77.6925				F - 6	13297		62.6439
	D - 6	12766		86.7432				G - 6	11192		52.727
32 uM	B - 7	8708	9202.33	59.1697	62.5286	4.24749		E - 7	2232	1928.67	10.5152	9.0862	1.26252
	C - 7	9905		67.3031				F - 7	1830		8.62137
	D - 7	8994		61.113				G - 7	1724		8.12199
64 uM	B - 8	3654	3775.67	24.8284	25.6551	4.32347		E - 8	910	863	4.28713	4.0657	0.257566
	C - 8	4464		30.3323				F - 8	876		4.12695
	D - 8	3209		21.8047				G - 8	803		3.78304
96 uM	B - 9	975	1125.67	6.62499	7.64875	1.4887		E - 9	677	687	3.18943	3.23655	0.129106
	C - 9	1377		9.35653				F - 9	666		3.13761
	D - 9	1025		6.96473				G - 9	718		3.38259
128 uM	B - 10	695	697.333	4.72243	4.73828	0.228042		E - 10	353	362.333	1.66303	1.707	0.313258
	C - 10	665		4.51858				F - 10	301		1.41805
	D - 10	732		4.97384				G - 10	433		2.03992

## Sheet: Figure 2-figure supplement 2 C
Relative cell number (%) of PEO4 and PEO1 cells after 6 days of treatment with SR3677 dihydrochloride
PEO	Well	Cell Count
			Exp 2															Well	Cell Count
	B - 2	20386	PEO
	B - 3	18663			NT	0.976562	1.95312	3.90625	7.8125	15.625	31.25	62.5	125	250				E - 2	38102
	B - 4	17810		PEO4	20386	18663	17810	17281	22940	21887	20242	14313	9231	5143		Cell Count		E - 3	44964
	B - 5	17281			20261	17203	18180	20487	27351	22658	21180	16798	12284	6644		Cell Count		E - 4	39997
	B - 6	22940			21044	20788	19166	18227	26078	19601	20128	14305	10753	7024		Cell Count		E - 5	37014
	B - 7	21887		PEO1	38102	44964	39997	37014	35268	23685	14153	9203	6427	629		Cell Count		E - 6	35268
	B - 8	20242			43087	42437	40890	31334	30973	21048	12888	9176	6182	713		Cell Count		E - 7	23685
	B - 9	14313			37004	35674	36180	24039	28452	19462	13244	9169	7084	193		Cell Count		E - 8	14153
	B - 10	9231																E - 9	9203
	B - 11	5143																E - 10	6427
	C - 2	20261																E - 11	629
	C - 3	17203			NT	0.976562	1.95312	3.90625	7.8125	15.625	31.25	62.5	125	250				F - 2	43087
	C - 4	18180		PEO4	20563.7	18884.7	18385.3	18665	25456.3	21382	20516.7	15138.7	10756	6270.33		Promedio		F - 3	42437
	C - 5	20487			420.65	1802.75	700.932	1647.27	2270.26	1589.84	577.284	1437.03	1526.5	994.616		D.S.		F - 4	40890
	C - 6	27351		PEO1	39397.7	41025	39022.3	30795.7	31564.3	21398.3	13428.3	9182.67	6564.33	511.667		Promedio		F - 5	31334
	C - 7	22658			3241.88	4803.26	2501.7	6504.23	3446.26	2133.19	652.335	17.9536	466.419	279.151		D.S.		F - 6	30973
	C - 8	21180																F - 7	21048
	C - 9	16798																F - 8	12888
	C - 10	12284			NT	0.976562	1.95312	3.90625	7.8125	15.625	31.25	62.5	125	250				F - 9	9176
	C - 11	6644		PEO4	100	91.8351	89.4069	90.7669	123.793	103.98	99.7714	73.6185	52.3058	30.4923				F - 10	6182
	D - 2	21044			2.0456	8.76668	3.40859	8.01058	11.0402	7.73129	2.8073	6.9882	7.4233	4.83676				F - 11	713
	D - 3	20788		PEO1	100	104.131	99.0473	78.1662	80.1173	54.3137	34.0841	23.3076	16.6617	1.29872				G - 2	37004
	D - 4	19166			8.22861	12.1917	6.34987	16.5092	8.74738	5.4145	1.65577	0.0455703	1.18387	0.708547				G - 3	35674
	D - 5	18227																G - 4	36180
	D - 6	26078																G - 5	24039
	D - 7	19601																G - 6	28452
	D - 8	20128																G - 7	19462
	D - 9	14305																G - 8	13244
	D - 10	10753																G - 9	9169
	D - 11	7024																G - 10	7084
																		G - 11	193
PEO	Well	Cell Count
			Exp 3															Well	Cell Count
			PEO
Well	Cell Count				NT	0.976562	1.95312	3.90625	7.8125	15.625	31.25	62.5	125	250				E - 2	17273
				PEO4		13148	13002	11204	11034	10666	9241	7076	5471			Cell Count		E - 3	17279
B - 2	8975				11358	14613	15126	13143	12999	11493	10301	8664	6706	1925		Cell Count		E - 4	17988
B - 3	13148				12876	14931	13817	14438	13965	12784	13411	9474	9146	3354		Cell Count		E - 5	15780
B - 4	13002			PEO1	17273	17279	17988	15780	11411	8187	5603	4201	2019	48		Cell Count		E - 6	11411
B - 5	11204				17845	20428	17150	15754	11761	10124	6368	5128	2377	68		Cell Count		E - 7	8187
B - 6	11034				18853	22708	16241	17667	15507	11331	7698	5385	3004	33		Cell Count		E - 8	5603
B - 7	10666																	E - 9	4201
B - 8	9241																	E - 10	2019
B - 9	7076																	E - 11	48
B - 10	5471				NT	0.976562	1.95312	3.90625	7.8125	15.625	31.25	62.5	125	250				F - 2	17845
B - 11	395			PEO4	12117	14230.7	13981.7	12928.3	12666	11647.7	10984.3	8404.67	7107.67	2639.5		Promedio		F - 3	20428
C - 2	11358				1073.39	951.003	1071.53	1627.65	1493.61	1067.44	2167.36	1219.85	1870.14	1010.46		D.S.		F - 4	17150
C - 3	14613			PEO1	17990.3	20138.3	17126.3	16400.3	12893	9880.67	6556.33	4904.67	2466.67	49.6667		Promedio		F - 5	15754
C - 4	15126				799.963	2726.07	873.74	1097.04	2270.54	1586.06	1060.12	622.794	498.584	17.5594		D.S.		F - 6	11761
C - 5	13143																	F - 7	10124
C - 6	12999																	F - 8	6368
C - 7	11493				NT	0.976562	1.95312	3.90625	7.8125	15.625	31.25	62.5	125	250				F - 9	5128
C - 8	10301			PEO4	100	117.444	115.389	106.696	104.531	96.1267	90.6523	69.3626	58.6586	21.7834				F - 10	2377
C - 9	8664				5.21983	7.8485	8.84321	13.4328	12.3265	8.80942	17.8869	10.0673	15.434	8.33916				F - 11	68
C - 10	6706			PEO1	100	111.94	95.1974	91.1619	71.6663	54.9221	36.4436	27.2628	13.7111	0.276074				G - 2	18853
C - 11	1925				2.03048	15.153	4.85672	6.09796	12.6209	8.81619	5.89273	3.46183	2.7714	0.0976048				G - 3	22708
D - 2	12876																	G - 4	16241
D - 3	14931																	G - 5	17667
D - 4	13817																	G - 6	15507
D - 5	14438																	G - 7	11331
D - 6	13965																	G - 8	7698
D - 7	12784																	G - 9	5385
D - 8	13411																	G - 10	3004
D - 9	9474																	G - 11	33
D - 10	9146

## Sheet: Figure 2-figure supplement 2 D
Relative cell number (%) of HCC1937BRCA1 and HCC1937 cells after 6 days of treatment with olaparib
	Well	Count
			Exp 1								HCC
	Well	Cell Count										Well	Cell Count
	B - 2	19175			NT	Olaparib 5	Olaparib 7.5	Olaparib 10				E - 2	11439
	C - 2	20796		HCC + B1	19175	18321	17608	14701		Cell Count		F - 2	11808
	D - 2	20258			20796	17557	17237	15382		Cell Count		G - 2	12288
5	B - 9	18321			20258	18989	17457	14587		Cell Count		E - 9	7461
	C - 9	17557		HCC	11439	7461	6284	4929		Cell Count		F - 9	8022
	D - 9	18989			11808	8022	5236	4920		Cell Count		G - 9	7986
7.5	B - 10	17608			12288	7986	5451	4772		Cell Count		E - 10	6284
	C - 10	17237										F - 10	5236
	D - 10	17457										G - 10	5451
10	B - 11	14701										E - 11	4929
	C - 11	15382			NT	Olaparib 5	Olaparib 7.5	Olaparib 10				F - 11	4920
	D - 11	14587		HCC + B1	20076.3	18289	17434	14890	#DIV/0!	Promedio		G - 11	4772
					825.628	716.536	186.566	429.88	#DIV/0!	D.S.
				HCC	11845	7823	5657	4873.67	#DIV/0!	Promedio
					425.708	314.018	553.537	88.1608	#DIV/0!	D.S.
					NT	Olaparib 5	Olaparib 7.5	Olaparib 10
				HCC + B1	100	91.0973	86.8386	74.1669	#DIV/0!
					4.11245	3.56906	0.929285	2.14123	#DIV/0!
				HCC	100	66.0447	47.7585	41.1453	#DIV/0!
					3.59399	2.65106	4.67317	0.744287	#DIV/0!
			Exp 2
Well	Cell Count		HCC
NT	B - 2	26834		NT	Oiaparib 1	Olaparib 5	Olaparib 7.5	Olaparib 10			E - 2	11703
	C - 2	27148	HCC + B1	26834	28383	28225	28537	25454		Cell Count	F - 2	12307
	D - 2	26825		27148	29278	28541	27033	25501		Cell Count	G - 2	11286
1	B - 3	28383		26825	28532	28607	27523	25923		Cell Count	E - 3	11492
	C - 3	29278	HCC	11703	11492	7858	6984	4793		Cell Count	F - 3	11712
	D - 3	28532		12307	11712	8231	6766	5419		Cell Count	G - 3	11552
5	B - 4	28225		11286	11552	7125	5841	5322		Cell Count	E - 4	7858
	C - 4	28541									F - 4	8231
	D - 4	28607									G - 4	7125
7.5	B - 5	28537									E - 5	6984
	C - 5	27033		NT	Oiaparib 1	Olaparib 5	Olaparib 7.5	Olaparib 10			F - 5	6766
	D - 5	27523	HCC + B1	26935.7	28731	28457.7	27697.7	25626		Promedio	G - 5	5841
10	B - 6	25454		183.941	258.281	479.538	767.063	258.281		D.S.	E - 6	4793
	C - 6	25501	HCC	11765.3	11585.3	7738	6530.33	5178		Promedio	F - 6	5419
	D - 6	25923		513.346	113.725	562.68	606.85	336.929		D.S.	G - 6	5322
				NT	Oiaparib 1	Olaparib 5	Olaparib 7.5	Olaparib 10
			HCC + B1	100	106.665	105.651	102.829	95.1378
				0.682891	0.95888	1.68509	2.69545	0.907597
			HCC	100	98.4701	65.7695	55.5049	44.0107
				4.36321	0.966609	4.78253	5.15795	2.86374
	Well	Count
			Exp 3											Ola
			HCC
0	B - 2	19997			NT	Oiaparib 1	Olaparib 5	Olaparib 7.5	Olaparib 10
	C - 2	19213		HCC + B1	19997	20409	19161		14162	Cell Count	E - 2	12445
	D - 2	19439			19213	20025	18384		15145	Cell Count	F - 2	12240
1	B - 9	20409			19439	19224	18668		14918	Cell Count	G - 2	12350
	C - 9	20025		HCC	12445	11525	7840		4527	Cell Count	E - 9	11525
	D - 9	19224			12240	11866	7609		4700	Cell Count	F - 9	11866
5	B - 10	19161			12350	11718	7587		4589	Cell Count	G - 9	11718
	C - 10	18384									E - 10	7840
	D - 10	18668									F - 10	7609
10	B - 11	14162									G - 10	7587
	C - 11	15145			NT	Oiaparib 1	Olaparib 5	Olaparib 7.5	Olaparib 10		E - 11	4527
	D - 11	14918		HCC + B1	19549.7	19886	18737.7	#DIV/0!	14741.7	Promedio	F - 11	4700
					403.546	604.605	393.157	#DIV/0!	514.677	D.S.	G - 11	4589
				HCC	12345	11703	7678.67	#DIV/0!	4605.33	Promedio
					102.591	170.994	140.151	#DIV/0!	87.6489	D.S.
					NT	Oiaparib 1	Olaparib 5	Olaparib 7.5	Olaparib 10
				HCC + B1	100	101.72	95.8465	#DIV/0!	75.4062
					2.06421	3.09266	2.01107	#DIV/0!	2.63266
				HCC	100	94.7995	62.2006	#DIV/0!	37.3053
					0.831036	1.38513	1.13529	#DIV/0!	0.709995

## Sheet: Figure 2-figure supplement 2 E
Relative cell number (%) of HCC1937BRCA1 and HCC1937 cells after 6 days of treatment with Fasudil
	Well	Count
			Exp 1								HCC
NT	B - 2	26316	HCC								E - 2	12285
	C - 2	27856			NT	Fasudil 32	Fasudil 64	Fasudil 96	Fasudil 128		F - 2	12422
	D - 2	25626		HCC + B1	26316	18116	10518	146	6	Cell Count	G - 2	11660
32	B - 3	18116			27856	15614	10141	361	38	Cell Count	E - 3	13360
	C - 3	15614			25626	12425	11577	35	9	Cell Count	F - 3	11088
	D - 3	12425		HCC	12285	13360	9226	7163	5235	Cell Count	G - 3	10805
64	B - 4	10518			12422	11088	8982	6913	4782	Cell Count	E - 4	9226
	C - 4	10141			11660	10805	8408	7042	5143	Cell Count	F - 4	8982
	D - 4	11577									G - 4	8408
96	B - 5	146									E - 5	7163
	C - 5	361									F - 5	6913
	D - 5	35			NT	Fasudil 32	Fasudil 64	Fasudil 96	Fasudil 128		G - 5	7042
128	B - 6	6		HCC + B1	26599.3	15385	10745.3	180.667	17.6667	Promedio	E - 6	5235
	C - 6	38			1141.68	2852.4	744.503	165.742	17.673	D.S.	F - 6	4782
	D - 6	9		HCC	12122.3	11751	8872	7039.33	5053.33	Promedio	G - 6	5143
					406.21	1400.6	419.948	125.021	239.442	D.S.
					NT	Fasudil 32	Fasudil 64	Fasudil 96	Fasudil 128
				HCC + B1	100	57.8398	40.397	0.679215	0.0664177
					4.29214	10.7236	2.79895	0.623105	0.0664413
				HCC	100	96.9368	73.1872	58.0691	41.6861
					3.35092	11.5539	3.46425	1.03133	1.97521
			Exp 2
Well	Cell Count		HCC
32	B - 7	20479		NT	Fasudil 32	Fasudil 64	Fasudil 96	Fasudil 128			E - 7	11328
	C - 7	22582	HCC + B1	26316	20479	17049	647	21		Cell Count	F - 7	10933
	D - 7	22479		27856	22582	16519	799	13		Cell Count	G - 7	11034
64	B - 8	17049		25626	22479	16108	664	20		Cell Count	E - 8	10206
	C - 8	16519	HCC	12285	11328	10206	8018	5708		Cell Count	F - 8	9984
	D - 8	16108		12422	10933	9984	7954	5775		Cell Count	G - 8	9366
96	B - 9	647		11660	11034	9366	7631	4943		Cell Count	E - 9	8018
	C - 9	799									F - 9	7954
	D - 9	664									G - 9	7631
128	B - 10	21									E - 10	5708
	C - 10	13		NT	Fasudil 32	Fasudil 64	Fasudil 96	Fasudil 128			F - 10	5775
	D - 10	20	HCC + B1	26599.3	21846.7	16558.7	703.333	18		Promedio	G - 10	4943
NT	B - 2	26316		1141.68	1185.55	471.752	83.2847	4.3589		D.S.	E - 2	12285
	C - 2	27856	HCC	12122.3	11098.3	9852	7867.67	5475.33		Promedio	F - 2	12422
	D - 2	25626		406.21	205.208	435.279	207.442	462.23		D.S.	G - 2	11660
				NT	Fasudil 32	Fasudil 64	Fasudil 96	Fasudil 128
			HCC + B1	100	82.1324	62.2522	2.64418	0.0676709
				4.29214	5.4267	2.84898	0.502967	0.026324
			HCC	100	91.5528	81.2715	64.9022	45.1673
				3.35092	1.69281	3.59072	1.71124	3.81304
	Well	Count
NT	B - 2	28612	Exp 3								NT	E - 2	14222
	C - 2	29935	HCC									F - 2	13622
	D - 2	28731			NT	Fasudil 32	Fasudil 64	Fasudil 96	Fasudil 128			G - 2	12789
32 uM	B - 7	17525		HCC + B1	28612	17525	7837	22	104	Cell Count	32 uM	E - 7	11862
	C - 7	18386			29935	18386	5416	41	226	Cell Count		F - 7	12199
	D - 7	21797			28731	21797	7485	22	133	Cell Count		G - 7	11636
64 uM	B - 8	7837		HCC	14222	11862	10379	5702	8483	Cell Count	64 uM	E - 8	10379
	C - 8	5416			13622	12199	10549	5619	8746	Cell Count		F - 8	10549
	D - 8	7485			12789	11636	9867	4991	8143	Cell Count		G - 8	9867
96 uM	B - 9	22									96 uM	E - 9	5702
	C - 9	41										F - 9	5619
	D - 9	22										G - 9	4991
128 uM	B - 10	104			NT	Fasudil 32	Fasudil 64	Fasudil 96	Fasudil 128		128 uM	E - 10	8483
	C - 10	226		HCC + B1	29092.7	19236	6912.67	28.3333	154.333	Promedio		F - 10	8746
	D - 10	133			731.905	2259.29	1308.05	10.9697	63.7364	D.S.		G - 10	8143
				HCC	13544.3	11899	10265	5437.33	8457.33	Promedio
					719.65	283.318	355.004	388.757	302.318	D.S.
					NT	Fasudil 32	Fasudil 64	Fasudil 96	Fasudil 128
				HCC + B1	100	66.1198	23.7609	0.0973899	0.530489
					2.51577	7.76582	4.49614	0.0377059	0.219081
				HCC	100	87.8522	75.7882	40.1447	62.4419
					5.31329	2.09178	2.62105	2.87026	2.23206
	Well	Count
HCC+B1	Well	Cell Count	Exp 5								HCC	Well	Cell Count
Control	B - 2	19175	HCC								NT	E - 2	11439
	C - 2	20796			NT	Fasudil 32	Fasudil 64	Fasudil 96	Fasudil 128			F - 2	11808
	D - 2	20258		HCC + B1	19175	26002	21168	2369	90	Cell Count		G - 2	12288
8 uM	B - 3	24048			20796	25314	23002	2362	111	Cell Count	8	E - 3	12103
	C - 3	23360			20258	24954	18460	7386	71	Cell Count		F - 3	12173
	D - 3	23205		HCC	11439	10830	9453	7629	4697	Cell Count		G - 3	12350
16 uM	B - 4	24048			11808	11037	9759	7428	5468	Cell Count	16	E - 4	11717
	C - 4	24498			12288	11344	9347	6874	4976	Cell Count		F - 4	12489
	D - 4	23744										G - 4	12190
32 uM	B - 5	26002									35	E - 5	10830
	C - 5	25314										F - 5	11037
	D - 5	24954			NT	Fasudil 32	Fasudil 64	Fasudil 96	Fasudil 128			G - 5	11344
64 uM	B - 6	21168		HCC + B1	20076.3	25423.3	20876.7	4039	90.6667	Promedio	64	E - 6	9453
	C - 6	23002			825.628	532.486	2284.97	2898.59	20.0083	D.S.		F - 6	9759
	D - 6	18460		HCC	11845	11070.3	9519.67	7310.33	5047	Promedio		G - 6	9347
96 uM	B - 7	2369			425.708	258.616	213.938	391.012	390.373	D.S.	96	E - 7	7629
	C - 7	2362										F - 7	7428
	D - 7	7386										G - 7	6874
128 uM	B - 8	90			NT	Fasudil 32	Fasudil 64	Fasudil 96	Fasudil 128		128	E - 8	4697
	C - 8	111		HCC + B1	100	126.633	103.986	20.1182	0.45161			F - 8	5468
	D - 8	71			4.11245	2.65231	11.3814	14.4378	0.0996613			G - 8	4976
				HCC	100	93.46	80.3687	61.7166	42.6087
					3.59399	2.18334	1.80614	3.30107	3.29568
			Exp 4
Well	Cell Count		HCC
NT	B - 2	28612		NT	Fasudil 32	Fasudil 64	Fasudil 96	Fasudil 128			NT	E - 2	14222
	C - 2	29935	HCC + B1	28612	18033	9888	112	93		Cell Count		F - 2	13622
	D - 2	28731		29935	16795	9035	102	34		Cell Count		G - 2	12789
32	B - 3	18033		28731	14804	8406	50	68		Cell Count	32 uM	E - 3	12010
	C - 3	16795	HCC	14222	12010	10280	8646	7169		Cell Count		F - 3	11295
	D - 3	14804		13622	11295	10413	8418	6526		Cell Count		G - 3	11820
64	B - 4	9888		12789	11820	10087	8328	6479		Cell Count	64 uM	E - 4	10280
	C - 4	9035										F - 4	10413
	D - 4	8406										G - 4	10087
96	B - 5	112									96 uM	E - 5	8646
	C - 5	102		NT	Fasudil 32	Fasudil 64	Fasudil 96	Fasudil 128				F - 5	8418
	D - 5	50	HCC + B1	29092.7	16544	9109.67	88	65		Promedio		G - 5	8328
128	B - 6	93		731.905	1629.07	743.816	33.2866	29.6142		D.S.	128 uM	E - 6	7169
	C - 6	34	HCC	13544.3	11708.3	10260	8464	6724.67		Promedio		F - 6	6526
	D - 6	68		719.65	370.349	163.918	163.915	385.521		D.S.		G - 6	6479
				NT	Fasudil 32	Fasudil 64	Fasudil 96	Fasudil 128
			HCC + B1	100	56.8666	31.3126	0.302482	0.223424
				2.51577	9.84688	8.16513	0.365399	0.325085
			HCC	100	86.4445	75.7512	62.4911	49.6493
				5.31329	2.73435	1.21023	1.21021	2.84636

## Sheet: Figure 2-figure supplement 2 F
Relative cell number (%) of BRCA1-proficient HCC1937BRCA1 and BRCA1-deficient HCC1937 cells after 6 days of treatment with Ripasudil
	Well	Count
			Exp 1								HCC
0	B - 2	19997									E - 2	12445		Ripa
	C - 2	19213			NT	Ripasudil 16	Ripasudil 32	Ripasudil 64	Ripasudil 128		F - 2	12240
	D - 2	19439		HCC + B1	19997	26796	19686	4993	224	Cell Count	G - 2	12350
8	B - 3	27960			19213	26792	18692	4802	180	Cell Count	E - 3	10830
	C - 3	26759			19439	26684	18788	4923	243	Cell Count	F - 3	10856
	D - 3	26054		HCC	12445	10047	8092	4478	1451	Cell Count	G - 3	10912
16	B - 4	26796			12240	9831	8485	4504	1583	Cell Count	E - 4	10047
	C - 4	26792			12350	10027	8511	3994	1540	Cell Count	F - 4	9831
	D - 4	26684									G - 4	10027
32	B - 5	19686									E - 5	8092
	C - 5	18692									F - 5	8485
	D - 5	18788			NT	Ripasudil 16	Ripasudil 32	Ripasudil 64	Ripasudil 128		G - 5	8511
64	B - 6	4993		HCC + B1	19549.7	26757.3	19055.3	4906	215.667	Promedio	E - 6	4478
	C - 6	4802			403.546	63.54	548.279	96.6282	32.3161	D.S.	F - 6	4504
	D - 6	4923		HCC	12345	9968.33	8362.67	4325.33	1524.67	Promedio	G - 6	3994
96	B - 7	1173			102.591	119.354	234.764	287.237	67.3226	D.S.	E - 7	2296
	C - 7	1475									F - 7	2212
	D - 7	1350									G - 7	2099
128	B - 8	224			NT	Ripasudil 16	Ripasudil 32	Ripasudil 64	Ripasudil 128		E - 8	1451
	C - 8	180		HCC + B1	100	136.868	97.4714	25.0951	1.10317		F - 8	1583
	D - 8	243			2.06421	0.325018	2.80454	0.49427	0.165303		G - 8	1540
				HCC	100	80.7479	67.7413	35.0371	12.3505
					0.831036	0.966819	1.9017	2.32675	0.545343
			Exp 2
Well	Cell Count		HCC
NT	B - 2	26834		NT	Ripasudil 16	Ripasudil 32	Ripasudil 64	Ripasudil 128			E - 2	11703
	C - 2	27148	HCC + B1	26834	24982	17150	4099	69		Cell Count	F - 2	12307
	D - 2	26825		27148	24604	18375	4379	33		Cell Count	G - 2	11286
16	B - 7	24982		26825	29596	17062	4044	54		Cell Count	E - 7	9958
	C - 7	24604	HCC	11703	9958	7856	4693	2485		Cell Count	F - 7	10050
	D - 7	29596		12307	10050	7808	4848	2449		Cell Count	G - 7	9814
32	B - 8	17150		11286	9814	7543	4796	2373		Cell Count	E - 8	7856
	C - 8	18375									F - 8	7808
	D - 8	17062									G - 8	7543
64	B - 9	4099									E - 9	4693
	C - 9	4379		NT	Ripasudil 16	Ripasudil 32	Ripasudil 64	Ripasudil 128			F - 9	4848
	D - 9	4044	HCC + B1	26935.7	26394	17529	4174	52		Promedio	G - 9	4796
128	B - 10	69		183.941	18.0831	2779.45	179.652	18.0831		D.S.	E - 10	2485
	C - 10	33	HCC	11765.3	9940.67	7735.67	4779	2435.67		Promedio	F - 10	2449
	D - 10	54		513.346	118.951	168.571	78.886	57.1781		D.S.	G - 10	2373
				NT	Ripasudil 16	Ripasudil 32	Ripasudil 64	Ripasudil 128
			HCC + B1	100	97.989	65.0773	15.4962	0.193053
				0.682891	0.0671346	15.8563	1.02489	0.103161
			HCC	100	84.4912	65.7497	40.6193	20.7021
				4.36321	1.01103	1.43278	0.670495	0.485988

## Sheet: Figure 2-figure supplement 2 G
qPCR BRCA1
Description of the Experiment (Title, Comment, Number)
Calculation Procedure for MNE			2
Threshold for SEM in %			20
							Mean of Triplicates
Well	Description	CT of Target Gene	CT of Reference Gene	Normalized Expression			Description	Mean Normalized Expression	SE of Mean Normalized Expression	SE of Mean Normalized Expression in %
A1	SCR	29.32	19.19	0.00784379			SCR	0.00771635	0.000461078	5.97534
A2		29.22	19.06	0.00759098			BRCA1	0.00283348	0.000641767	22.6494
A3
A4	BRCA1	29.88	18.08	0.00231519
A5		29.95	18.67	0.00346779
A6
A7
A8
A9
A10
A11
A12
B1
B2
B3
B4
B5
B6
B7
B8
B9
B10
B11
B12
C1
C2
C3
C4
C5
C6
C7
C8
C9
C10
C11
C12
D1
D2
D3
D4
D5
D6
D7
D8
D9
D10
D11
D12
E1
E2
E3
E4
E5
E6
E7
E8
E9
E10
E11
E12
F1
F2							SCR	1	0.0597534
F3							BRCA1	0.367205	0.0831698
F4
F5
F6
F7
F8
F9
F10
F11
F12
G1	sample 25
G2
G3
G4	sample 26
G5
G6
G7	sample 27
G8
G9
G10	sample 28
G11
G12
H1	sample 29
H2
H3
H4	sample 30
H5
H6
H7	sample 31
H8
H9
H10	sample 32
H11
H12

## Sheet: Figure 2-figure supplement 2 G´
BRCA1 exp2
Calculation Procedure for MNE			2
Threshold for SEM in %			20
							Mean of Triplicates
Well	Description	CT of Target Gene	CT of Reference Gene	Normalized Expression			Description	Mean Normalized Expression	SE of Mean Normalized Expression	SE of Mean Normalized Expression in %
A1	SCR	27.58	18.21	0.0118075			SCR	0.0115942	0.000499542	4.30856
A2		27.52	18.11	0.0113847			BRCA1	0.00518624	0.000784583	15.1282
A3
A4	BRCA1	27.91	17.26	0.00458914
A5		27.99	17.65	0.00586102
A6
A7
A8
A9
A10
A11
A12
B1
B2
B3
B4
B5
B6
B7
B8
B9
B10
B11
B12
C1
C2
C3
C4
C5
C6
C7
C8
C9
C10
C11
C12
D1
D2
D3
D4
D5
D6
D7
D8
D9
D10
D11
D12
E1
E2
E3
E4
E5
E6
E7
E8
E9
E10
E11
E12
F1
F2							SCR	1	0.0430856
F3							BRCA1	0.447314	0.0676704
F4
F5
F6
F7
F8
F9
F10
F11
F12
G1	sample 25
G2
G3
G4	sample 26
G5
G6
G7	sample 27
G8
G9
G10	sample 28
G11
G12
H1	sample 29
H2
H3
H4	sample 30
H5
H6
H7	sample 31
H8
H9
H10	sample 32
H11
H12

## Sheet: Figure 2-figure supplement 2 H
Relative cell number (%) of shScramble and shBRCA1 HCT116p21-/- cells after 6 days of treatment with olaparib
			BRCA1	Exp 1+2
				HCT116			Olaparib
					NT	0.1 uM	0.5 uM	1 uM	1.5 uM
				WT	19052	18564	16309	12960	12432	Cell Count
					20949	21192	21626	16903	15077	Cell Count
					21516					Cell Count
					21850					Cell Count
				shBRCA1	22490	18187	15402	8310	7453	Cell Count
					20010	17947	16127	7975	5954	Cell Count
					25186					Cell Count
					26259					Cell Count
					NT	0.1 uM	0.5 uM	1 uM	1.5 uM
				WT	20841.8	19878	18967.5	14931.5	13754.5	Promedio
					1249.79	1858.28	3759.69	2788.12	1870.3	D.S.
				shBRCA1	23486.2	18067	15764.5	8142.5	6703.5	Promedio
					2807.97	169.706	512.652	236.881	1059.95	D.S.
					NT	0.1 uM	0.5 uM	1 uM	1.5 uM
				WT	100	95.3759	91.0072	71.6423	65.9949
					5.99655	8.91613	18.0392	13.3776	8.9738
				shBRCA1	100	76.9259	67.1223	34.6692	28.5422
					11.9558	0.722574	2.18278	1.00859	4.51308

## Sheet: Figure 2-figure supplement 2 I
	Relative cell number (%) of shScramble and shBRCA1 HCT116p21-/- cells after 6 days of treatment with Fasudil
		shScramble							shBRCA1
		Well	Cell #	AVG	Survival	Avg Surv	StDev		Well	Cell #	AVG	Survival	Avg Surv	StDev
	NT	B - 2	22505	24633.7	91.3587	100	7.50575		E - 2	19966	19284.7	103.533	100	3.66193
		C - 2	25556		103.744				F - 2	18556		96.2215
		D - 2	25840		104.897				G - 2	19332		100.245
	Ola 0.5 uM	B - 3	17125	18472.3	69.5187	74.9882	4.85465		E - 3	4164	3811	21.5923	19.7618	2.81028
		C - 3	18884		76.6593				F - 3	4082		21.1671
		D - 3	19408		78.7865				G - 3	3187		16.5261
Fasudil	16 uM	B - 4	19123	17655.7	77.6295	71.6729	5.16931		E - 4	12766	11811.3	66.1977	61.2473	6.58935
		C - 4	16840		68.3617				F - 4	12299		63.7761
		D - 4	17004		69.0275				G - 4	10369		53.7681
	32 uM	B - 5	12285	10505	49.8708	42.6449	6.40214		E - 5	4789	3858.67	24.8332	20.009	4.41371
		C - 5	9282		37.6801				F - 5	3668		19.0203
		D - 5	9948		40.3838				G - 5	3119		16.1735
	64 uM	B - 6	770	892	3.1258	3.62106	0.516752		E - 6	94	121.333	0.487434	0.62917	0.123184
		C - 6	1024		4.15691				F - 6	137		0.710409
		D - 6	882		3.58047				G - 6	133		0.689667
	96 uM	B - 7	51	47	0.207034	0.190796	0.0429616		E - 7	13	20.6667	0.0674111	0.107166	0.0415916
		C - 7	35		0.142082				F - 7	29		0.150379
		D - 7	55		0.223272				G - 7	20		0.103709
	128 uM	B - 8	9	17	0.0365354	0.0690112	0.0292734		E - 8	13	20	0.0674111	0.103709	0.0424449
		C - 8	23		0.0933682				F - 8	18		0.0933384
		D - 8	19		0.0771302				G - 8	29		0.150379
		shSCR
		Well	Cell #	AVG	Survival	Avg Surv	StDev
	NT	B - 2	25073	25531.3	98.2048	100	1.55571
		C - 2	25746		100.841
		D - 2	25775		100.954
	Ola 0.5 uM	B - 3	24033	24984.7	94.1314	97.8588	3.23042
		C - 3	25492		99.8459
		D - 3	25429		99.5992
	8 uM	B - 4	26387	25306.7	103.351	99.12	4.18393
		C - 4	25282		99.0234
		D - 4	24251		94.9852
Fasudil	16 uM	B - 5	24461	23781.7	95.8078	93.147	3.27177
		C - 5	22849		89.494
		D - 5	24035		94.1392
	32 uM	B - 6	18206	17325	71.3085	67.8578	3.2234
		C - 6	16576		64.9241
		D - 6	17193		67.3408
	64 uM	B - 7	816	809.667	3.19607	3.17127	0.820842
		C - 7	597		2.3383
		D - 7	1016		3.97942
	96 uM	B - 8	39	60.3333	0.152753	0.236311	0.118629
		C - 8	47		0.184088
		D - 8	95		0.372092
	128 uM	B - 9	16	18	0.0626681	0.0705016	0.0630342
		C - 9	35		0.137086
		D - 9	3		0.0117503
		shBRCA1								shBRCA2
		Well	Cell #	AVG	Survival	Avg Surv	StDev			Well	Cell #	AVG	Survival	Avg Surv	StDev
	NT	E - 2	23460	23224.3	101.015	100	2.48769		NT	B - 2	17939	17370.7	103.272	100	5.20049
		F - 2	22566		97.1653					C - 2	17844		102.725
		G - 2	23647		101.82					D - 2	16329		94.0033
	Ola 0.5 uM	E - 3	20047	17535	86.3189	75.5027	9.78003		Ola 0.5 uM	B - 3	5760	4541.67	33.1593	26.1456	10.8347
		F - 3	16932		72.9063					C - 3	5491		31.6108
		G - 3	15626		67.2829					D - 3	2374		13.6667
Fasudil	8 uM	E - 4	22066	21225.7	95.0124	91.3941	4.21154		8 uM	B - 4	19337	16154.7	111.32	92.9997	17.4801
		F - 4	21459		92.3988					C - 4	13289		76.5025
		G - 4	20152		86.7711					D - 4	15838		91.1767
	16 uM	E - 5	20717	20070.3	89.2039	86.4194	2.4825		16 uM	B - 5	13395	12719.5	77.1128	76.0286	6.22242
		F - 5	19884		85.6171					C - 5	12044		69.3353
		G - 5	19610		84.4373					D - 5	14181		81.6376
	32 uM	E - 6	15020	13016.7	64.6735	56.0475	7.79129		32 uM	B - 6	7666	5803	44.1319	33.4069	9.44995
		F - 6	12529		53.9477					C - 6	5174		29.7858
		G - 6	11501		49.5213					D - 6	4569		26.303
	64 uM	E - 7	320	248	1.37787	1.06785	0.555719		64 uM	B - 7	96	117	0.552656	0.673549	0.111183
		F - 7	325		1.39939					C - 7	121		0.696577
		G - 7	99		0.426277					D - 7	134		0.771415
	96 uM	E - 8	30	23.3333	0.129175	0.100469	0.0248597		96 uM	B - 8	34	26.3333	0.195732	0.151597	0.0408424
		F - 8	20		0.0861166					C - 8	25		0.143921
		G - 8	20		0.0861166					D - 8	20		0.115137
	128 uM	E - 9	38	27	0.163621	0.116257	0.0415239		128 uM	B - 9	43	31.3333	0.247544	0.180381	0.0760105
		F - 9	23		0.0990341					C - 9	34		0.195732
		G - 9	20		0.0861166					D - 9	17		0.0978661
