# Supplementary material for: Inhibitors of Rho kinases (ROCK) induce multiple mitotic defects and synthetic lethality in BRCA2-deficient cells
Source: eLife journal article supplement (doi:10.7554/elife.80254), 2023-04-19
Supplement: supp [file Figure 2- Figure supplement 3- source data 2.xlsx]

## Sheet: Figure 2- supplement 3AI
Relative cell number (%)
Exp1	Well	Count		Wt				DLD-1 B2-/-
			Exp 1					E - 2	17362						Exp 2
NT	B - 2	28813	DLD-1					F - 2	17935			Well	Cell Count		DLD-1
	C - 2	30367			NT	Olaparib 7.5		G - 2	19223						Wt			DLD-1 B2-/-
	D - 2	30834		DLD-1 WT	28813	13557	Cell Count	E - 3	332				DLD-1 WT			NT	Olaparib 7.5		E - 2	19918
Ola 7.5 uM	B - 3	13557			30367	11365	Cell Count	F - 3	259			Control	B - 2	31359	DLD-1 WT	31359	16420	Cell Count	F - 2
	C - 3	11365			30834	13561	Cell Count	G - 3	320				C - 2	29910		29910	19533	Cell Count	G - 2	16092
	D - 3	13561		DLD-1 B2	17362	332	Cell Count						D - 2	30619		30619	18504	Cell Count	E - 3	103
					17935	259	Cell Count					Ola 7.5 uM	B - 3	16420	DLD-1 B2	19918	103	Cell Count	F - 3	57
					19223	320	Cell Count						C - 3	19533			57	Cell Count	G - 3	71
													D - 3	18504		16092	71	Cell Count
					NT	Olaparib 7.5
				DLD-1 WT	30004.7	12827.7	Promedio									NT	Olaparib 7.5
					1058.1	1266.71	D.S.								DLD-1 WT	30629.3	18152.3	Promedio
				DLD-1 B2	18173.3	303.667	Promedio									724.555	1586.02	D.S.
					953.117	39.145	D.S.								DLD-1 B2	18005	77	Promedio
																2705.39	23.5797	D.S.
					NT	Olaparib 7.5
				DLD-1 WT	100	42.7522										NT	Olaparib 7.5
					3.52645	4.2217									DLD-1 WT	100	59.2645
				DLD-1 B2	100	1.67095										2.36556	8.73725
					5.24459	0.215398									DLD-1 B2	100	0.427659
																15.0258	0.130962
			BRCA2	Exp 1
				HCT116			Olaparib
					NT	0.1 uM	0.5 uM	1 uM	1.5 uM
Well	Cell Count			WT	19945	15580	16601	13807	12911	Cell Count
E - 3	14711				19535	17530	19079	14754	13380	Cell Count
E - 5	5120				17194	16490	18469	13167	11412	Cell Count
E - 6	5461			shBRCA2	14711	11668	9665	5120	5461	Cell Count
E - 8	11668				16013	11121	7957	6053		Cell Count
F - 3	16013				15523	8532		5736	4262	Cell Count
F - 4	9665
F - 5	6053
F - 8	11121
G - 3	15523				NT	0.1 uM	0.5 uM	1 uM	1.5 uM
G - 4	7957			WT	18891.3	16533.3	18049.7	13909.3	12567.7	Promedio
G - 5	5736				1484.16	975.722	1291.12	798.434	1027.94	D.S.
G - 6	4262			shBRCA2	15415.7	10440.3	8811	5636.33	4861.5	Promedio
G - 8	8532				657.603	1675.14	1207.74	474.418	847.821	D.S.
					NT	0.1 uM	0.5 uM	1 uM	1.5 uM
				WT	105.332	92.1847	100.639	77.5541	70.0734
					8.27521	5.44032	7.19891	4.45182	5.73148
				shBRCA2	#DIV/0!	#DIV/0!	#DIV/0!	#DIV/0!	#DIV/0!
					#DIV/0!	#DIV/0!	#DIV/0!	#DIV/0!	#DIV/0!
B - 7	21516
B - 8	17160
B - 9	16233		SCR	NT		0.1		0.5		1		1.5
B - 10	10285			21516		17160		16233		10285		10257
B - 11	10257			21850		21047		17602		15015		11512
C - 7	21850			21683		19103.5		16917.5		12650		10884.5
C - 8	21047			100		88.1036		78.022		58.3406		50.1983
C - 9	17602
C - 10	15015
C - 11	11512
			BRCA2	NT		0.1		0.5		1		1.5
				21866		13501		15641		7027		4697
F - 7	21866			15440		12958		11733		5260		3099
F - 8	13501			18653		13229.5		13687		6143.5		3898
F - 9	15641			100		70.9242		73.3769		32.9357		20.8974
F - 10	7027
F - 11	4697
G - 7	15440
G - 8	12958
G - 9	11733
G - 10	5260
G - 11	3099

## Sheet: Figure 2- supplement 3AII
Relative cell number (%)
exp1
			2	3	8		4	5	6
	VC8#13		NT	Ola 1	Ola 0,5	F8	F16	F32	F64		VC8	NT	Ola 1	Ola0,5	F8	F16	F32	F64
			19082	10064	18874	19662	17147	17227	10383			8605	188	703	7776	6229	2988	142
			18433	12237	18146	20000	17359	17479	10529			9697	200	623	5388	4178	2942	149
			17228									9151
			18247.7
			-834.333	8183.67	-626.333	-1414.33	1100.67	1020.67	7864.67			546	8963	8448	1375	2922	6163	9009
			-83433.3	818367	-62633.3	-141433	110067	102067	786467			54600	896300	844800	137500	292200	616300	900900
			-4.57227	44.8477	-3.4324	-7.75076	6.03182	5.59341	43.0996			5.96656	97.9456	92.3178	15.0257	31.9309	67.3478	98.4483
			95.43	55.1523	96.57	92.25	93.9682	94.4066	56.9004			94.0334	2.05442	7.68222	84.9743	68.0691	32.6522	1.55174
			-185.333	6010.67	101.667	-1752.33	888.667	768.667	7718.67			-546	8951	8528	3763	4973	6209	9002
			-18533.3	601067	10166.7	-175233	88866.7	76866.7	771867			-54600	895100	852800	376300	497300	620900	900200
			-1.01565	32.9394	0.557149	-9.60305	4.87003	4.21241	42.2995			-5.96656	97.8144	93.192	41.1212	54.3438	67.8505	98.3718
			98.99	67.0606	99.4429	90.4	95.13	95.13	95.13			94.04	2.18555	6.808	58.8788	45.6562	32.1495	1.62824
			1019.67
			101967
			5.58793
			94.4121
			96.2774	61.1064	98.0064	91.325	94.5491	94.7683	76.0152			94.0367	2.05442	7.24511	71.9266	56.8626	32.4008	1.58999
exp2
		Nuclei
Well		Nuc Intensity	Cell Count
					VC8#13	NT	Ola 0.5uM	Ola 1uM	Fasudil 8uM	Fasudil 16uM	Fasudil 32uM	Vol 5nM	Vol 10nM			VC8	NT	Ola 0.5uM	Ola 1uM	Fasudil 8uM	Fasudil 16uM	Fasudil 32uM	Vol 5nM	Vol 10nM
B - 2		18841.4	10573			10573	13416	12480	9117	10330	7285	9972	8381				12922	138	186	12275	7867	6567	9265	7404
B - 3		16129.4	13416			11723	12995	13608	10098	8439	7401	9818	7739				10752	983	185	8316	6805	2554	8597
B - 4		15810.9	12480			10440	12154	13119	14155	7812	5602	9712	10373				11336	78	44	7141	4919	2110	7424	8457
B - 5		15243	9117			10912											11670
B - 6		16170.4	10330
B - 7		16639.6	7285
B - 8		16534	9972
B - 9		17567.3	8381
C - 2		17195.8	11723			339	-2504	-1568	1795	582	3627	940	2531				-1252	11532	11484	-605	3803	5103	2405	4266
C - 3		16807.4	12995			33900	-250400	-156800	179500	58200	362700	94000	253100				-125200	1153200	1148400	-60500	380300	510300	240500	426600
C - 4		16719.4	13608			3.10667	-22.9472	-14.3695	16.4498	5.33358	33.2386	8.61437	23.1946				-10.7284	98.8175	98.4062	-5.18423	32.5878	43.7275	20.6084	36.5553
C - 5		16161.7	10098
C - 6		16691.7	8439			96.8933	77.06	85.64	83.5502	94.6664	66.7614	91.3856	76.8054				89.28	1.18252	1.59383	105.184	67.4122	56.2725	79.3916	63.4447
C - 7		16518.5	7401
C - 8		15908.6	9818
C - 9		17052.4	7739			-811	-2083	-2696	814	2473	3511	1094	3173				918	10687	11485	3354	4865	9116	3073
D - 2		16066.6	10440			-81100	-208300	-269600	81400	247300	351100	109400	317300				91800	1068700	1148500	335400	486500	911600	307300
D - 3		16036.7	12154			-7.7682	-19.9521	-25.8238	7.79693	23.6877	33.6303	10.4789	30.3927				8.53795	99.3955	106.817	31.1942	45.2474	84.7842	28.5807
D - 4		16216.5	13119
D - 5		16190	14155			92.24	80.05	74.2	92.21	76.32	66.3697	89.5211	69.6073				91.4621	0.604539		68.8058	54.7526	15.2158	71.4193
D - 6		16007.2	7812
D - 7		17568.2	5602			NT	Ola 0.5uM	Ola 1uM	Fasudil 8uM	Fasudil 16uM	Fasudil 32uM	Vol 5nM	Vol 10nM
D - 8		15491.7	9712			472	-1242	-2207	-3243	3100	5310	1200	539				334	11592	11626	4529	6751	9560	4246	3213
D - 9		16265.6	10373			47200	-124200	-220700	-324300	310000	531000	120000	53900				33400	1159200	1162600	452900	675100	956000	424600	321300
E - 2		14496.3	12922			4.32551	-11.382	-20.2254	-29.7196	28.4091	48.662	10.9971	4.93952				2.86204	99.3316	99.623	38.8089	57.8492	81.9195	36.3839	27.5321
E - 3		13370.8	138
E - 4		12096.5	186			95.6745	111.382	120.225	129.72	71.5909	51.338	89.0029	95.0605				97.138	0.66838	0.377035	61.1911	42.1508	18.0805	63.6161	72.4679
E - 5		14663.7	12275			94.9359	89.4973	93.3551	101.827	80.8591	61.4897	89.9699	80.491				92.6267	0.893529	1.59383	86.995	54.7719	29.8563	71.4757	67.9563
E - 6		13704.6	7867
E - 7		15563.7	6567
E - 8		14553.7	9265
E - 9		14710.6	7404
F - 2		14334.6	10752
F - 3		11740.8	983
F - 4		11388.8	185
F - 5		13925.5	8316
F - 6		14162.7	6805
F - 7		14925.8	2554
F - 8		13605.2	8597
F - 9		15315.4	327
G - 2		14228.3	11336
G - 3		10222.1	78
G - 4		10836.1	44
G - 5		13647.8	7141
G - 6		14478.1	4919
G - 7		14690.6	2110
G - 8		13556.7	7424
G - 9		13313.4	8457
exp3
		Nuclei
Well		Nuc Intensity	Cell Count
					VC8#13	NT	Ola 0.5uM	Fasudil 16uM	Fasudil 32uM	Fasudil 64uM	Fasudil 128uM				NT	Ola 0.5uM	Fasudil 16uM	Fasudil 32uM	Fasudil 64uM	Fasudil 128uM
B - 2		16011.3	2572		700	15722	13264	16710	14533	14920	12				17645	24	9734	4846	1127	39
B - 3		17033.3	13264			10492	13960	13416	11609	11723	24				19298	18	10755	5064	1087	42
B - 4		17239.7	16710			13904	14327	13481	12390	11720	24				8742	49	12706	2470	522	48
B - 5		17530.3	14533			13372.7									15228.3
B - 6		15789.1	14920
B - 7		17479.4	12
B - 8		15673.1	3806			-2349.33	108.667	-3337.33	-1160.33	-1547.33	13360.7				-2416.67	15204.3	5494.33	10382.3	14101.3	15189.3
C - 2		16060.8	10492			-234933	10866.7	-333733	-116033	-154733	1.33607e+06				-241667	1.52043e+06	549433	1.03823e+06	1.41013e+06	1.51893e+06
C - 3		16784.4	13960			-14.943	0.691176	-21.2272	-7.38032	-9.84184	84.9807				-15.8695	99.8424	36.0797	68.1777	92.5993	99.7439
C - 4		17006.5	13416
C - 5		19256	11609			85.057	99.3088	121.227	107.38	109.842	15.0193				84.14	0.157601	63.9203	31.8223	7.40068	0.256102
C - 6		16425.9	11723
C - 7		14459.7	24			2880.67	-587.333	-43.3333	1763.67	1649.67	13348.7				-4069.67	15210.3	4473.33	10164.3	14141.3	15186.3
C - 8		17045.1	14327			288067	-58733.3	-4333.33	176367	164967	1.33487e+06				-406967	1.52103e+06	447333	1.01643e+06	1.41413e+06	1.51863e+06
D - 2		17267.9	844			21.5415	-4.39204	-0.324044	13.1886	12.3361	99.8205				-26.7243	99.8818	29.3751	66.7462	92.862	99.7242
D - 3		19073.1	476
D - 4		14957.4	3481			78.4585	104.392	100.324	86.8114	87.6639	0.179471				73.28	0.118201	70.6249	33.2538	7.13801	0.275802
D - 5		16128.9	12390			NT	Ola 0.5uM	Fasudil 16uM	Fasudil 32uM	Fasudil 64uM	Fasudil 128uM
D - 6		16663.2	2290			-531.333	-954.333	-108.333	982.667	1652.67	13348.7				6486.33	15179.3	2522.33	12758.3	14706.3	15180.3
D - 7		14162.5	24			-53133.3	-95433.3	-10833.3	98266.7	165267	1.33487e+06				648633	1.51793e+06	252233	1.27583e+06	1.47063e+06	1.51803e+06
D - 8		14959.4	13904			-3.97328	-7.13645	-0.81011	7.34832	12.3585	99.8205				42.5938	99.6782	16.5634	83.7802	96.5722	99.6848
E - 2		16011	17645			NT	Ola 0.5uM	Fasudil 16uM	Fasudil 32uM	Fasudil 64uM	Fasudil 128uM
E - 3		9397.06	24			96.03	107.136	100.81	92.6517	87.6415	0.179471				57.4062	0.321769	83.4366	16.2198	3.42782	0.315202
E - 4		17142.6	9734			86.5152	103.612	107.454	95.6145	95.0491	5.12608				71.6087	0.19919	72.6606	27.0986	5.98884	0.282368
E - 5		17952.7	4846
E - 6		16780.1	1127
E - 7		15548.3	39
E - 8		9074.92	4
F - 2		15889.2	19298
F - 3		18720.8	18
F - 4		17019	10755
F - 5		17924.4	5064
F - 6		16659.3	1087
F - 7		12648.2	42
F - 8		11874.6	15
G - 2		14528.5	5595
G - 3		13148.9	49
G - 4		16302.1	12706
G - 5		16382.2	2470
G - 6		15833.1	522
G - 7		15874.7	48

## Sheet: Figure 2- supplement 3 B
Relative cell number (%)
Well
		PEO4		# cells	avg control	survival	avg survival	stdev		PEO1		# cells	avg control	survival	avg survival	stdev
		Control	B - 2	8305	7934.33	104.676	100.004	4.10492		NT	E - 2	11848	11886.7	99.6719	99.9972	5.23178
			C - 2	7694		96.975					F - 2	11285		94.9356
			D - 2	7804		98.3615					G - 2	12527		105.384
		0.5 uM	B - 3	7851		98.9539	108.672	8.9493		Ola 0.5	E - 3	11577	11498	97.3921	96.7275	10.5776
			C - 3	9249		116.574					F - 3	12714		106.957
			D - 3	8766		110.487					G - 3	10203		85.8333
		1 uM	B - 4	7912		99.7227	108.18	9.76574		Ola 1	E - 4	11703	10815.7	98.4521	90.9874	11.8886
			C - 4	9431		118.868					F - 4	11558		97.2323
			D - 4	8406		105.949					G - 4	9186		77.2777
		2.5 uM	B - 5	6988		88.0766	96.097	7.0515		Ola 2.5	E - 5	11224	9388	94.4225	78.977	13.5579
			C - 5	7846		98.8908					F - 5	8207		69.0418
			D - 5	8039		101.323					G - 5	8733		73.4668
		5 uM	B - 6	5036		63.4737	73.6745	11.3233		Ola 5	E - 6	6406	5968	53.8908	50.2061	6.22249
			C - 6	6812		85.8583					F - 6	5114		43.0218
			D - 6	5688		71.6915					G - 6	6384		53.7057
		7.5 uM	B - 7	2953		37.2196	43.7484	6.05552		Ola 7.5	E - 7	4832	3753.67	40.6494	31.5779	7.85888
			C - 7	3902		49.1807					F - 7	3239		27.2483
			D - 7	3558		44.845					G - 7	3190		26.836
		10 uM	B - 8	2836		35.7449	29.0018	22.2509		Ola 10	E - 8	600	1645	5.04753	13.8386	15.0086
			C - 8	3737		47.1011					F - 8	3705		31.1685
			D - 8	330		4.15931					G - 8	630		5.29991
Well	Cell Count
B - 2	8714		0	B - 2	8714	8143	107.012	100	7.88462		E - 2	9561	8584	111.382	100	16.0961
B - 3	9832			C - 2	8267		101.523				F - 2
B - 4	5560			D - 2	7448		91.4651				G - 2	7607		88.6184
B - 5	3822		2.5	B - 3	9832		120.742	112.649	12.2236		E - 3	7577		88.2689	73.9205	15.4873
B - 6	1091			C - 3	8028		98.5877				F - 3	6523		75.9902
B - 7	10115			D - 3	9659		118.617				G - 3	4936		57.5023
B - 8	8619		5	B - 4	5560		68.2795	67.69	3.23348		E - 4	6561		76.4329	59.0012	17.035
B - 9	4880			C - 4	5748		70.5882				F - 4	4994		58.178
C - 2	8267			D - 4	5228		64.2024				G - 4	3639		42.3928
C - 3	8028		7.5	B - 5	3822		46.936	44.1197	3.15526		E - 5	3248		37.8378	25.765	10.6254
C - 4	5748			C - 5	3315		40.7098				F - 5	1856		21.6216
C - 5	3315			D - 5	3641		44.7133				G - 5	1531		17.8355
C - 6	1116		10	B - 6	1091		13.398	11.8343	2.97827		E - 6	679		7.91007	5.29668	2.53229
C - 7	7974			C - 6	1116		13.705				F - 6	440		5.12582
C - 8	8273			D - 6	684		8.39985				G - 6	245		2.85415
C - 9	5213		64	B - 7	10115		124.217	111.044	13.1463		E - 7	3110		36.2302	32.1878	7.43969
D - 2	7448			C - 7	7974		97.9246				F - 7	3153		36.7311
D - 3	9659			D - 7	9038		110.991				G - 7	2026		23.6021
D - 4	5228		96	B - 8	8619		105.846	102.35	3.18672		E - 8	1121		13.0592	10.0109	2.77892
D - 5	3641			C - 8	8273		101.596				F - 8	803		9.35461
D - 6	684			D - 8	8111		99.607				G - 8	654		7.61883
D - 7	9038		128	B - 9	4880		59.9288	60.244	3.62689		E - 9	192		2.23672	1.8717	0.437803
D - 8	8111			C - 9	5213		64.0182				F - 9	119		1.3863
D - 9	4624			D - 9	4624		56.785				G - 9	171		1.99208
E - 2	9561
E - 3	7577
E - 4	6561
E - 5	3248
E - 6	679
E - 7	3110
E - 8	1121
E - 9	192
F - 2	934
F - 3	6523
F - 4	4994
F - 5	1856
F - 6	440
F - 7	3153
F - 8	803
F - 9	119
G - 2	7607
G - 3	4936
G - 4	3639
G - 5	1531
G - 6	245
G - 7	2026
G - 8	654
G - 9	171

## Sheet: Figure 2- supplement 3 E,
Relative cell number (%) of PEO4 and PEO1 cells treated with cisplatin (24 hours) followed by 5 days of growth in cisplatin-free media
Exp1			Curva Cisplatin
Well	Cell Count		PEO
B - 2	10633		PEO4				Cisplatin															D - 2	9284
B - 3	13973																					D - 3	14470
B - 4	11020		Fasu		NT		0.75		0.5		1		1.25		1.5		2		NT	NT		D - 4	12156
B - 5	11428		10633	73.1329	13973	96.1051	11020	75.7946	11428	78.6008	9908	68.1464	7636	52.5198	7226	49.6998	4618	31.7622	15045	13761		D - 5	14770
B - 6	9908		9321	64.1091	15328	105.425	12552	86.3316	11683	80.3547	9200	63.2768	8130	55.9175	7638	52.5335	5715	39.3073	15415	13783		D - 6	13100
B - 7	7636		9284	63.8546	14470	99.5235	12156	83.608	14770	101.587	13100	90.1007	9832	67.6237		0		0				D - 7	9832
B - 8	7226		3279.33		14539.3		11909.3		12627		10736		8532.67		7432		5166.5		15230	13772		D - 8	9
B - 9	4618	PEO1	22.555		100		81.9114		86.8475		73.8413		58.687		51.1167		35.5348					D - 9	10
B - 10	15045																					D - 10	7
B - 11	13761		Fasu		NT		0.75		0.5		1		1.25		1.5		6		NT	NT		D - 11	11
C - 2	9321		2139	23.6851	8478		5389	59.6722	6912	76.5364	4442	49.1861	2901	32.1227	2414	26.7302	1779	19.6988	9914			E - 2	2139
C - 3	15328		2141	23.7072	6811		7116	78.7953	6934	76.78	4485	49.6623	3037	33.6286	2204	24.4048	2098	23.2311	8228	8424		E - 3	8478
C - 4	12552		2157	23.8844	11851		5214	57.7345	5636	62.4073	5219	57.7898	4329	47.9349	3007	33.2964	1594	17.6503	9101	9441		E - 4	5389
C - 5	11683		145.667		9031		5906.33		6494		5016.33		3422.33		3143.67		1823.67		9081	8932.5		E - 5	6912
C - 6	9200		1.61296		100		65.4007		71.9079		55.5457		37.8954		34.8097		20.1934					E - 6	5345
C - 7	8130																					E - 7	2901
C - 8	7638																					E - 8	3317
C - 9	5715																					E - 9	1779
C - 10	15415																					E - 10	9914
C - 11	13783																					E - 11	7687
																						F - 2	2141
																						F - 3	6811
																						G - 8	3007
																						G - 9	1594
Exp2																						G - 10	9101
																						G - 11	9441
Cisplatino (uM)
	PEO4							PEO1
NT	B - 2	9526	10221	93.2003	100	7.84314		E - 2	17785	18446	96.4166	100	6.38119
	C - 2	10039		98.2194				F - 2	17748		96.216
	D - 2	11098		108.58				G - 2	19805		107.367
0.5	B - 3	10382		101.575	94.2341	6.6062		F - 3	13242		71.7879	76.2333	4.31137
	C - 3	9073		88.7682				E - 3	14830		80.3968
	D - 3	9440		92.3589				G - 3	14114		76.5152
1	B - 4	9337		91.3511	86.5571	5.14161		F - 4	7982		43.2723	44.6745	1.22915
	C - 4	8912		87.193				E - 4	8335		45.1859
	D - 4	8292		81.1271				G - 4	8405		45.5654
1.5	B - 5	7181		70.2573	61.9085	7.78145		E - 5	2916		15.8083	15.7902	1.31745
	C - 5	6195		60.6105				F - 5	2668		14.4638
	D - 5	5607		54.8576				G - 5	3154		17.0986
2	B - 6	3328		32.5604	34.8596	5.13244		E - 6	1035		5.61097	7.65658	2.01473
	C - 6	4164		40.7397				F - 6	1424		7.71983
	D - 6	3197		31.2787				G - 6	1778		9.63895
2.5	B - 7	3026		29.6057	25.9922	3.39668		E - 7	956		5.1827	4.32072	0.970854
	C - 7	2607		25.5063				F - 7	603		3.269
	D - 7	2337		22.8647				G - 7	832		4.51046
3	B - 8	2054		20.0959	18.3478	2.1497		E - 8	569		3.08468	3.15335	0.256369
	C - 8	1942		19.0001				F - 8	542		2.93831
	D - 8	1630		15.9476				G - 8	634		3.43706
3.5	B - 9	1425		13.9419	16.2802	2.319		E - 9	425		2.30402	2.19198	0.27772
	C - 9	1899		18.5794				F - 9	346		1.87575
	D - 9	1668		16.3193				G - 9	442		2.39618
4	B - 10	1086		10.6252	11.959	1.21502		E - 10	303		1.64263	2.09621	0.579142
	C - 10	1252		12.2493				F - 10	350		1.89743
	D - 10	1329		13.0026				G - 10	507		2.74856
Fasu 128 uM	B - 11	5468		53.4977	60.6399	9.64942		E - 11	434		2.35281	2.65279	0.562355
	C - 11	5806		56.8046				F - 11	425		2.30402
	D - 11	7320		71.6173				G - 11	609		3.30153
