# Supplementary material for: Inhibitors of Rho kinases (ROCK) induce multiple mitotic defects and synthetic lethality in BRCA2-deficient cells
Source: eLife journal article supplement (doi:10.7554/elife.80254), 2023-04-19
Supplement: supp [file Figure 2- source data 1.xlsx]

## Sheet: Figure 2A
Relative cell number (%)
Relative cell number (%) of shScramble and shBRCA2 HCT116p21-/- cells after 6 days of treatment with Fasudil
HCT116 p21 -/-
	exp 1
		SCR					B1					B2
	NT	16019	16482	97.1909	100		12938	13685	94.5415	100		6261	6414	97.6146	100
		16945		102.809			14432		105.459			6567		102.385
	OLA	15791		95.8075	94.1421		8564		62.5795	60.4969		2346		36.5762	36.5295
		15242		92.4766			7994		58.4143			2340		36.4827
	5V	14551		88.2842	80.9004		13210		96.529	86.2477		5843		91.0976	94.3561
		12117		73.5166			10396		75.9664			6261		97.6146
	7,5V	18697		113.439	116.588		6054		44.2382	48.8089		7516		117.181	103.243
		19735		119.737			7305		53.3796			5728		89.3046
	10V	16557		100.455	100.237		3899		28.491	32.5758		5466		85.2198	86.701
		16485		100.018			5017		36.6606			5656		88.1821
Fasudil	8F	15137		91.8396	96.3657		9175		67.0442	73.0069		5653		88.1353	75.2572
		16629		100.892			10807		78.9697			4001		62.3792
	16F	15819		95.9774	79.8143		7674		56.076	55.0932		5634		87.8391	63.6888
		10491		63.6513			7405		54.1103			2536		39.5385
	32F	14390		87.3074	94.0359		8547		62.4552	33.7779		3400		53.009	34.261
		16608		100.764			698		5.10047			995		15.5129
	exp2
		SCR					B1					B2
	NT	10008	9860.5	101.496	100		10202	10554.5	96.6602	100		3265	3431.5	95.1479	100
		9713		98.5041			10907		103.34			3598		104.852
	Ola 0,5uM	9276		94.0723	99.7363		10354		98.1003	90.5491		1682		49.0165	34.4019
		10393		105.4			8760		82.9978			679		19.7873
	Ola 1uM	8299		84.1641	83.9511		8147		77.1898	65.7303		374		10.899	10.3745
		8257		83.7381			5728		54.2707			338		9.84992
Fasudil	8uM Fasudil	9254		93.8492	80.6551		8375		79.35	78.4594		1251		36.4564	39.1811
		6652		67.4611			8187		77.5688			1438		41.9059
	16uM Fasudil	6097		61.8326	54.693		8288		78.5257	76.7777		1281		37.3306	24.6248
		4689		47.5534			7919		75.0296			409		11.919
	32uM Fasudil	719		7.29172	5.09102		1382		13.0939	11.4596		216		6.29462	7.22716
		285		2.89032			1037		9.82519			280		8.1597
	64uM Fasudil	14		0.141981	0.167334		30		0.284239	0.393197		177		5.15809	2.72476
		19		0.192688			53		0.502155			10		0.291418
	128uM Fasudil	8		0.0811318	0.0811318		22		0.208442	0.213179		30		0.874253	0.568265
		8		0.0811318			23		0.217917			9		0.262276
	exp3
		SCR					B1					B2
	Non-treated	20520	20296	101.104	100		16509	16743	98.6024	100		14108	13227.5	106.657	100
		20072		98.8963			16977		101.398			12347		93.3434
	Olaparib 0,5uM	19701		97.0684	96.4821		9364		55.9279	57.5196		9770		73.8613	73.6798
		19463		95.8957			9897		59.1113			9722		73.4984
	Volasertib 5nM	19910		98.0981	98.342		17258		103.076	99.1429		15814		119.554	110.232
		20009		98.5859			15941		95.2099			13348		100.911
	Volasertib 7,5nM	20082		98.9456	97.7976		6320		37.7471	39.739		16928		127.976	116.265
		19616		96.6496			6987		41.7309			13830		104.555
	Volasertib 10nM	19712		97.1226	96.1224		8984		53.6582	49.4147		17039		128.815	121.278
		19306		95.1222			7563		45.1711			15045		113.74
Fasudil	Fasudil 8uM	18657		91.9245	80.3804		7326		43.7556	57.4957		13701		103.58	87.0913
		13971		68.8362			11927		71.2357			9339		70.6029
	Fasudil 16uM	17888		88.1356	83.7283		176		1.05119	3.73589		2323		17.5619	25.171
		16099		79.321			1075		6.42059			4336		32.7802
	Fasudil 32uM	2956		14.5644	12.2315		60		0.358359	0.358359		480		3.6288	5.79475
		2009		9.8985								1053		7.96069

## Sheet: Figure 2B
Relative cell number (%)
Relative cell number (%) of DLD-1WTand DLD-1BRCA2-/- after 6 days of treatment with Fasudil
	Well	Count									Well	Count
NT	B - 2	28813	Exp 1								E - 2	17362
	C - 2	30367	DLD-1								F - 2	17935
	D - 2	30834			NT	Fasudil 32	Fasudil 64	Fasudil 96	Fasudil 128		G - 2	19223
Ola 7.5 uM	B - 3	13557		DLD-1 Wt	28813	28109	29085	19290	7684	Cell Count	E - 3	332
	C - 3	11365			30367	30866	30664	21934	7407	Cell Count	F - 3	259
	D - 3	13561			30834	28320	25943	21472	7257	Cell Count	G - 3	320
Fasu 32 uM	B - 4	28109		DLD-1 B2-/-	17362	13595	10039	5474	332	Cell Count	E - 4	13595
	C - 4	30866			17935	15230	9591	5565	259	Cell Count	F - 4	15230
	D - 4	28320			19223	12711	10026	5977	320	Cell Count	G - 4	12711
64 Um	B - 5	29085									E - 5	10039
	C - 5	30664									F - 5	9591
	D - 5	25943									G - 5	10026
96 uM	B - 6	19290			NT	Fasudil 32	Fasudil 64	Fasudil 96	Fasudil 128		E - 6	5474
	C - 6	21934		DLD-1 WT	30004.7	29098.3	28564	20898.7	7449.33	Promedio	F - 6	5565
	D - 6	21472			1058.1	1534.48	2403.24	1412.17	216.625	D.S.	G - 6	5977
128 Um	B - 7	7684		DLD-1 B2-/-	18173.3	13845.3	9885.33	5672	303.667	Promedio
	C - 7	7407			953.117	1278.02	254.983	268.028	39.145	D.S.
	D - 7	7257
					NT	Fasudil 32	Fasudil 64	Fasudil 96	Fasudil 128
				DLD-1 WT	100	96.9794	95.1985	69.6514	24.8272
					3.52645	5.11412	8.00954	4.70649	0.721971
				DLD-1 B2-/-	100	76.1849	54.3947	31.2106	1.67095
					5.24459	7.0324	1.40306	1.47484	0.215398
			Exp 2
Well	Cell Count		DLD-1
	DLD-1 WT			NT	Fasudil 32	Fasudil 64	Fasudil 96	Fasudil 128			DLD-1 B2
Control	B - 2	31359	DLD-1 Wt	31359	31377	24531	17133	5325		Cell Count	E - 2	19918
	C - 2	29910		29910	31936	27003	19343	7713		Cell Count	G - 2	16092
	D - 2	30619		30619	30838	26243	18256	5934		Cell Count	E - 3	103
Ola 5 uM	B - 3	16420	DLD-1 B2-/-	19918	12725	9157	4258	2335		Cell Count	F - 3	57
	C - 3	19533			12678	7442	3509	2164		Cell Count	G - 3	71
	D - 3	18504		16092	11877	9956	3552	2223		Cell Count	E - 4	12725
Fasu 32	B - 4	31377									F - 4	12678
	C - 4	31936									G - 4	11877
	D - 4	30838									E - 5	9157
64	B - 5	24531		NT	Fasudil 32	Fasudil 64	Fasudil 96	Fasudil 128			F - 5	7442
	C - 5	27003	DLD-1 WT	30629.3	31383.7	25925.7	18244	6324		Promedio	G - 5	9956
	D - 5	26243		724.555	549.03	1266.18	1105.05	1240.85		D.S.	E - 6	4258
96	B - 6	17133	DLD-1 B2-/-	18005	12426.7	8851.67	3773	2240.67		Promedio	F - 6	3509
	C - 6	19343		2705.39	476.605	1284.51	420.572	86.8581		D.S.	G - 6	3552
	D - 6	18256									E - 7	2335
128	B - 7	5325									F - 7	2164
	C - 7	7713		NT	Fasudil 32	Fasudil 64	Fasudil 96	Fasudil 128			G - 7	2223
	D - 7	5934	DLD-1 WT	100	102.463	84.6433	59.5638	20.6469
				2.36556	1.74941	4.8839	4.26237	4.78619
			DLD-1 B2-/-	100	69.0179	49.1623	20.9553	12.4447
				15.0258	2.64707	7.13419	2.33586	0.482411

## Sheet: Figure 2C
Relative cell number (%)
Relative cell number (%) of V-C8#13 and V-C8 cells after 6 days of treatment with Fasudil
Well	Cell Count		Exp 1
			VC8
B - 2	19082				NT	Fasudil 8	Fasudil 16	Fasudil 32	Fasudil 64
B - 3	19662			VC8#13	19082	19662	17147	17227	10383	Cell Count
B - 4	17147				18433	20000	17359	17479	10529	Cell Count
B - 5	17227				17228					Cell Count
B - 6	10383			VC8	8605	7776	6229	2988	142	Cell Count
C - 2	18433				9697	5388	4178	2942	149	Cell Count
C - 3	20000									Cell Count
C - 4	17359
C - 5	17479
C - 6	10529
D - 2	17228				NT	Fasudil 8	Fasudil 16	Fasudil 32	Fasudil 64
E - 2	8605			VC8#13	18247.7	19831	17253	17353	10456	Promedio
E - 3	7776				940.792	239.002	149.907	178.191	103.238	D.S.
E - 4	6229			VC8	9151	6582	5203.5	2965	145.5	Promedio
E -5	2988				772.161	1688.57	1450.28	32.5269	4.94975	D.S.
E - 6	142
F - 2	9697
F - 3	5388				NT	Fasudil 8	Fasudil 16	Fasudil 32	Fasudil 64
F - 4	4178			VC8#13	100	108.677	94.5491	95.0971	57.3005
F - 5	2942				5.15569	1.30977	0.821511	0.976513	0.565758
F - 6	149			VC8	100	71.9266	56.8626	32.4008	1.58999
					8.43799	18.4523	15.8483	0.355447	0.0540897
			Exp 2
Well	Cell Count		VC8
B - 3	10573			NT	Fasudil 8	Fasudil 16	Fasudil 32	Fasudil 64
B - 4	9117		VC8#13	10573	9117	10330	7285			Cell Count
B - 5	10330			11723	10098	8439	7401			Cell Count
B - 6	7285			10440	14155	7812	5602			Cell Count
C - 3	11723		VC8	12922	12275	7867	6567			Cell Count
C - 4	10098			10752	8316	6805	2554			Cell Count
C - 5	8439			11336	7141	4919	2110			Cell Count
C - 6	7401
D - 3	10440
D - 4	14155
D - 5	7812			NT	Fasudil 8	Fasudil 16	Fasudil 32	Fasudil 64
D - 6	5602		VC8#13	10912	11123.3	8860.33	6762.67	#DIV/0!		Promedio
E - 2	12922			705.488	2670.93	1310.81	1006.84	#DIV/0!		D.S.
E - 3	12275		VC8	11670	9244	6530.33	3743.67	#DIV/0!		Promedio
E - 4	7867			1122.89	2689.87	1493.07	2455.14	#DIV/0!		D.S.
E -5	6567
F - 2	10752
F - 3	8316			NT	Fasudil 8	Fasudil 16	Fasudil 32	Fasudil 64
F - 4	6805		VC8#13	100	101.937	81.1981	61.9746	#DIV/0!
F - 5	2554			6.46525	24.0119	14.7941	11.3634	#DIV/0!
G - 2	11336		VC8	100	79.2117	55.9583	32.0794	#DIV/0!
G - 3	7141			9.62206	23.0494	12.7941	21.038	#DIV/0!
G - 4	4919
G - 5	2110

## Sheet: Figure 2CI
Relative cell number (%)
Relative cell number (%) of V-C8#13 and V-C8 cells after 6 days of treatment with Fasudil
			Exp 3
			VC8
Well	Cell Count				NT	Fasudil 8	Fasudil 16	Fasudil 32	Fasudil 64
				VC8#13	24798	22562	26435	23141	11965	Cell Count
B - 2	24798				26778	26856	26653	22872	10687	Cell Count
B - 3	22562				27956	24111	26560	23051	10217	Cell Count
B - 4	26435			VC8	17150	17078	17974	10666	2528	Cell Count
B - 5	23141				20100	17987	15048	10604	2735	Cell Count
B - 6	11965				17016	17991	15083	10310	1280	Cell Count
C - 2	26778
C - 3	26856
C - 4	26653
C - 5	22872				NT	Fasudil 8	Fasudil 16	Fasudil 32	Fasudil 64
C - 6	10687			VC8#13	26510.7	24509.7	26549.3	23021.3	10956.3	Promedio
D - 2	27956				1595.88	2174.58	109.391	136.932	904.589	D.S.
D - 3	24111			VC8	18088.7	17685.3	16035	10526.7	2181	Promedio
D - 4	26560				1743.15	525.97	1679.31	190.182	787.123	D.S.
D - 5	23051
D - 6	10217
E - 2	17150				NT	Fasudil 8	Fasudil 16	Fasudil 32	Fasudil 64
E - 3	17078			VC8#13	100	92.4521	100.146	86.838	41.328
E - 4	17974				6.01978	8.20267	0.412629	0.516516	3.41217
E - 5	10666			VC8	100	97.7702	88.6467	58.1948	12.0573
E - 6	2528				9.63672	2.90773	9.28379	1.05139	4.35147
F - 2	20100
F - 3	17987
F - 4	15048
F - 5	10604
F - 6	2735
G - 2	17016
G - 3	17991
G - 4	15083
G - 5	10310
G - 6	1280

## Sheet: Figure 2CII
Relative cell number (%)
Relative cell number (%) of V-C8#13 and V-C8 cells after 6 days of treatment with Fasudil
			Exp 4
			VC8
Well	Cell Count				NT	Fasudil 8	Fasudil 16	Fasudil 32	Fasudil 64
				VC8#13	15722		16710	14533	14920	Cell Count
B - 2	15722				10492		13416	11609	11723	Cell Count
B - 3	16710				13904		13481	12390	11720	Cell Count
B - 4	14533			VC8	17645		9734	4846	1127	Cell Count
B - 5	14920				19298		10755	5064	1087	Cell Count
C - 2	10492				8712		12706	2470	552	Cell Count
C - 3	13416
C - 4	11609
C - 5	11723
D - 2	13904				NT	Fasudil 8	Fasudil 16	Fasudil 32	Fasudil 64
D - 3	13481			VC8#13	13372.7		14535.7	12844	12787.7	Promedio
D - 4	12390				2655.18		1883.31	1513.95	1846.66	D.S.
D - 5	11720			VC8	15218.3		11065	4126.67	922	Promedio
E - 2	17645				5694.94		1510.06	1438.85	321.053	D.S.
E - 3	9734
E - 4	4846
E - 5	1127				NT	Fasudil 8	Fasudil 16	Fasudil 32	Fasudil 64
F - 2	19298			VC8#13	100		108.697	96.0467	95.6254
F - 3	10755				19.8552		14.0833	11.3212	13.8092
F - 4	5064			VC8	100		72.7084	27.1164	6.05848
F - 5	1087				37.4216		9.92261	9.45471	2.10965
G - 2	8712
G - 3	12706
G - 4	2470
G - 5	552

## Sheet: Figure 2D
Relative cell number (%)
Relative cell number (%) of PEO4 and PEO1 cells after 6 days of treatment with Fasudil
	Well	Count
			Exp 1
NT	B - 2	7076	PEOs								NT	E - 2	16404
	C - 2	6770			NT	Fasudil 32	Fasudil 64	Fasudil 96	Fasudil 128			F - 2	14724
	D - 2	6620		PEO4	7076	7072	5490	5292	3713	Cell Count		G - 2	13520
F32	B - 5	7072			6770	6372	5241	4454	3875	Cell Count	F32	E - 5	17883
	C - 5	6372			6620	6286	4641	5256	3821	Cell Count		F - 5	14852
	D - 5	6286		PEO1	16404	17883	14757	8811	4277	Cell Count		G - 5	14038
F64	B - 6	5490			14724	14852	13151	8494	4110	Cell Count	F64	E - 6	14757
	C - 6	5241			13520	14038	11102	6183	3224	Cell Count		F - 6	13151
	D - 6	4641										G - 6	11102
F98	B - 7	5292									F98	E - 7	8811
	C - 7	4454										F - 7	8494
	D - 7	5256			NT	Fasudil 32	Fasudil 64	Fasudil 96	Fasudil 128			G - 7	6183
F128	B - 8	3713		PEO4	6822	6576.67	5124	5000.67	3803	Promedio	F128	E - 8	4277
	C - 8	3875			232.405	431.121	436.425	473.769	82.4864	D.S.		F - 8	4110
	D - 8	3821		PEO1	14882.7	15591	13003.3	7829.33	3870.33	Promedio		G - 8	3224
					1448.53	2026.23	1831.97	1434.55	565.935	D.S.
					NT	Fasudil 32	Fasudil 64	Fasudil 96	Fasudil 128
				PEO4	100	96.4038	75.1099	73.3021	55.7461
					3.4067	6.31957	6.39732	6.94473	1.20912
				PEO1	100	104.759	87.3723	52.6071	26.0056
					9.73301	13.6147	12.3094	9.63906	3.80264
			Exp 2
Well	Cell Count		PEOs
NT	B - 2	19723		NT	Fasudil 32	Fasudil 64	Fasudil 96	Fasudil 128			NT	E - 2	23804
	C - 2	19088	PEO4	19723	20568	19277	16042	14973		Cell Count		F - 2	20187
	D - 2	17540		19088	20341	19224	16225	14874		Cell Count		G - 2	19211
F32	B - 4	20568		17540	20882	16962	16031	12127		Cell Count	32	E - 4	18963
	C - 4	20341	PEO1	23804	18963	17427	11590	4750		Cell Count		F - 4	16142
	D - 4	20882		20187	16142	18289	10562	4934		Cell Count		G - 4	17741
F64	B - 5	19277		19211	17741	14778	8034	4723		Cell Count	64	E - 5	17427
	C - 5	19224										F - 5	18289
	D - 5	16962										G - 5	14778
F98	B - 6	16042									98	E - 6	11590
	C - 6	16225		NT	Fasudil 32	Fasudil 64	Fasudil 96	Fasudil 128				F - 6	10562
	D - 6	16031	PEO4	18783.7	20597	18487.7	16099.3	13991.3		Promedio		G - 6	8034
F128	B - 7	14973		1122.87	271.663	1321.53	108.969	1615.32		D.S.	128	E - 7	4750
	C - 7	14874	PEO1	21067.3	17615.3	16831.3	10062	4802.33		Promedio		F - 7	4934
	D - 7	12127		2419.74	1414.69	1829.73	1829.97	114.823		D.S.		G - 7	4723
				NT	Fasudil 32	Fasudil 64	Fasudil 96	Fasudil 128
			PEO4	100	109.654	98.4242	85.7092	74.4867
				5.9779	1.31895	7.14818	0.589417	8.73728
			PEO1	100	83.6144	79.893	47.7611	22.7952
				11.4858	6.7151	8.68513	8.68628	0.545029

## Sheet: Figure 2E
FACS analysis of SYTOX green-stained PEO4 and PEO1 cells 6 days after Fasudil treatment
	Data available in Dryad o request to the authors
