# Supplementary material for: Inhibitors of Rho kinases (ROCK) induce multiple mitotic defects and synthetic lethality in BRCA2-deficient cells
Source: eLife journal article supplement (doi:10.7554/elife.80254), 2023-04-19
Supplement: supp [file Figure 3- figure supplement 1- source data 1.xlsx]

## Sheet: Figure 3 A
Percent of shScramble or shBRCA2 HCT116p21-/- cells with >5 53BP1 foci
HCT116 p21-/-	Exp1
53BP1 foci
	Exp1		negative cells	<5 foci	positive cells	total cells	% positive cells	%negative cells	<5 foci (1-2)
	SCR	NT	189	70	41	300	13.6667	63	23.3333
		Olaparib	183	38	77	298	25.8389	61.4094	12.7517
		Fasudil	133	61	69	263	26.2357	50.5703	23.1939
	B1	NT	239	66	52	357	14.5658	66.9468	18.4874
		Olaparib	109	50	178	337	52.819	32.3442	14.8368
		Fasudil 16uM	161	75	68	304	22.3684	52.9605	24.6711
	B2	NT	181	46	73	300	24.3333	60.3333	15.3333
		Olaparib	55	46	210	311	67.5241	17.6849	14.791
		Fasudil	185	48	74	307	24.1042	60.2606	15.6352
	exp3
53BP1 foci	Celulas	Tratamientos	N° total de celulas	<5 foci	Porcentajes
	SCR	NT	301	25	8.30565
	BRCA2	NT	314	32	10.1911
	SCR	Olaparib	218	36	16.5138
	BRCA2	Olaparib	332	159	47.8916
	SCR	Fasudil	226	22	9.73451
	BRCA2	Fasudil	294	26	8.84354
Exp 2 12.9.17		negative cells	<5 foci	positive cells	total cells	% positive cells	%negative cells	<5 foci			% positive cells	% negative cells	<5 foci
SCR	NT	225	50	25	300	8.33333	75	16.6667	SCR	NT	8.33333	75	16.6667
	Ola 0.5uM	201	59	40	300	13.3333	67	19.6667		Ola 0.5uM	13.3333	67	19.6667
	Fasudil 0,25uM	227	61	12	300	4	75.6667	20.3333		Fasudil 0,25uM	4	75.6667	20.3333
	Fasudil 4uM	189	68	43	300	14.3333	63	22.6667		Fasudil 4uM	14.3333	63	22.6667
shBRCA1.3	NT	215	60	25	300	8.33333	71.6667	20	shBRCA1.3	NT	8.33333	71.6667	20
	Ola 0.5uM	96	55	149	300	49.6667	32	18.3333		Ola 0.5uM	49.6667	32	18.3333
	Fasudil 0,25uM	se dio vuelta			0					Fasudil 0,25uM
	Fasudil 4uM	218	56	26	300	8.66667	72.6667	18.6667		Fasudil 4uM	8.66667	72.6667	18.6667
shBRCA2.3	NT	228	48	24	300	8	76	16	shBRCA2.3	NT	8	76	16
	Ola 0.5uM	109	53	138	300	46	36.3333	17.6667		Ola 0.5uM	46	36.3333	17.6667
	Fasudil 0,25uM	198	68	34	300	11.3333	66	22.6667		Fasudil 0,25uM	11.3333	66	22.6667
	Fasudil 4uM	200	54	36	290	12.4138	68.9655	18.6207		Fasudil 4uM	12.4138	68.9655	18.6207
		SCR	B1.3	B2.3
	NT	8.33333	8.33333	8
	Ola 0.5uM	13.3333	49.6667	46
	Fasudil 0,25uM	4		11.3333
	Fasudil 4uM	14.3333	8.66667	12.4138
	Combinacion de los dos:
		SCR	B1.3	B2.3
	NT	6.33333	7.33333	8.33333
	Olaparib 0.5uM	14.9502	51.6667	47.6667
	Fasudil 0,25uM	6.33333	6	12.9139
	Fasudil 0,5uM	13.3333	8	25
		SCR	B1.3	B2.3
	NT	7.33333	7.83333	8.16667
	Olaparib 0.5uM	14.1417	50.6667	46.8333
	Fasudil 0,25uM	5.16667	6	12.1236
	Fasudil 0,5uM	13.3333	8	25
	Fasudil 4uM	14.3333	8.66667	12.4138
		SCR	B1.3	B2.3
	NT	7.33333	7.83333	8.16667
	Olaparib 0.5uM	14.1417	50.6667	46.8333
	Fasudil 0,25uM	5.16667	6	12.1236
	Fasudil 4uM	14.3333	8.66667	12.4138

## Sheet: Figure 3 B
Percent of shScramble or shBRCA2 HCT116p21-/- cells with >35 γH2AX foci
HCT116 p21-/-
Exp
		negative cells	Reticulate cells	Pannuclear	positive cells	total cells	%negative cells	%positive cells	%ret	%pann
SCR	NT	210	0	2	88	300	70	29.3333	0	0.666667
	Ola 0.5uM	172	0	2	48	222	77.4775	21.6216	0	0.900901
shBRCA2	NT	217	8	0	75	300	72.3333	25	2.66667	0
	Ola 0.5uM	100	0	0	200	300	33.3333	66.6667	0	0
		%positive cells	%ret	%pann	SUMA %positive
SCR	NT	29.3333	0		29.3333
	Ola 0.5uM	41.6667	0	0.666667	42.3333
shBRCA2	NT	25	2.66667	0	27.6667
	Ola 0.5uM	66.6667	0	0	66.6667
Exp 2
Celulas	treatment	total cells	yH2AX Positive	percent
SCR	NT	245	28	11.4286
BRCA2	NT	236	30	12.7119
SCR	OLA	309	35	11.3269
BRCA2	OLA	278	168	60.4317
SCR	Fasudil 32	238	25	10.5042
BRCA2	Fasudil 32	231	27	11.6883
exp 1
HCT 116 p21-	treatement	total cells	>35	percent			total	>35	percent
BRCA 2	Olaparib	181	88	48.6188	SCR	Olaparib	279	30	10.7527
BRCA 2	NT	290	26	8.96552	SCR	NT	293	22	7.50853
BRCA 2	Fasudil	201	20	9.95025	SCR	Fasudil	174	22	12.6437

## Sheet: Figure 3 C
Percent of PEO4 and PEO1 cells with >35 γ-H2A.X foci
H2AX foci	Exp 1
Cells	Treatment	<35 foci	>35 foci	Total Celulas	%>35 foci
PEO1	NT	312	15	327	4.58716
	Cisplatin	192	159	351	45.2991
	Fasudil	321	20	341	5.8651
PEO4	NT	300	45	345	13.0435
	Cisplatin	315	49	364	13.4615
	Fasudil	328	15	343	4.37318
	Exp2
Celulas	Tratamiento	>35	<35	Total	%>35
PEO1	NT	24	392	416	5.76923
	Cisplatin	121	280	401	30.1746
	Fasudil	21	310	331	6.34441
PEO4	NT	34	257	291	11.6838
	Cisplatin	39	279	318	12.2642
	Fasudil	11	175	186	5.91398
