# Supplementary material for: Inhibitors of Rho kinases (ROCK) induce multiple mitotic defects and synthetic lethality in BRCA2-deficient cells
Source: eLife journal article supplement (doi:10.7554/elife.80254), 2023-04-19
Supplement: supp [file Figure 3- figure supplement 1- source data 2.xlsx]

## Sheet: BRCA2 Ola
Number of 53BP1 foci/cell in shScramble and shBRCA2 HCT116p21-/- cells
	Area	Mean	Min	Max	IntDen	RawIntDen	number of Foci
1	33.124	1.048	0	255	34.724	1020	4
2	25.124	0	0	0	0	0	0
3	14.4	0	0	0	0	0	0
4	14.298	0	0	0	0	0	0
5	70.845	0.123	0	255	8.681	255	1
6	89.739	0	0	0	0	0	0
7	31.15	0	0	0	0	0	0
8	56.172	0	0	0	0	0	0
9	128.957	0	0	0	0	0	0
10	57.261	0.152	0	255	8.681	255	1
11	104.82	0.248	0	255	26.043	765	3
12	59.168	0	0	0	0	0	0
13	87.117	0.1	0	255	8.681	255	1
14	109.348	0.159	0	255	17.362	510	2
15	112.378	0.386	0	255	43.405	1275	5
16	131.885	0.395	0	255	52.087	1530	6
17	119.901	0.217	0	255	26.043	765	3
18	124.259	0.279	0	255	34.724	1020	4
19	86.062	0.101	0	255	8.681	255	1
20	52.155	0	0	0	0	0	0
21	41.022	0	0	0	0	0	0
22	52.972	0.819	0	255	43.405	1275	5
23	97.603	0.445	0	255	43.405	1275	5
24	126.812	0.411	0	255	52.087	1530	6
25	137.944	0.629	0	255	86.811	2550	10
26	117.246	0	0	0	0	0	0
27	59.27	0.439	0	255	26.043	765	3
28	84.734	0.82	0	255	69.449	2040	8
29	104.105	0	0	0	0	0	0
30	105.194	0.248	0	255	26.043	765	3
31	151.187	0.459	0	255	69.449	2040	8
32	63.253	0.274	0	255	17.362	510	2
33	104.241	0	0	0	0	0	0
34	99.884	0.087	0	255	8.681	255	1
35	111.969	0.31	0	255	34.724	1020	4
36	99.373	0.175	0	255	17.362	510	2
37	122.454	0.071	0	255	8.681	255	1
38	80.615	0.215	0	255	17.362	510	2
39	173.145	0	0	0	0	0	0
40	15.422	0	0	0	0	0	0
41	144.617	0.42	0	255	60.768	1785	7
42	188.669	0.092	0	255	17.362	510	2
43	130.319	0	0	0	0	0	0
44	174.473	0.05	0	255	8.681	255	1
45	77.313	0	0	0	0	0	0
46	70.13	0.124	0	255	8.681	255	1
47	145.025	0.419	0	255	60.768	1785	7
48	130.659	0.266	0	255	34.724	1020	4
49	75.577	0	0	0	0	0	0
50	144.242	0.12	0	255	17.362	510	2
51	33.635	0.258	0	255	8.681	255	1
52	158.064	0.659	0	255	104.173	3060	12
53	172.498	0.101	0	255	17.362	510	2
54	84.258	0	0	0	0	0	0
55	70.266	0.865	0	255	60.768	1785	7
56	66.521	0.783	0	255	52.087	1530	6
57	230.474	0.226	0	255	52.087	1530	6
58	69.789	0.249	0	255	17.362	510	2
59	82.76	0.42	0	255	34.724	1020	4
60	74.964	0.232	0	255	17.362	510	2
61	107.033	0.081	0	255	8.681	255	1
62	75.849	0.114	0	255	8.681	255	1
63	106.386	0.653	0	255	69.449	2040	8
64	89.807	0.193	0	255	17.362	510	2
65	16.545	0.525	0	255	8.681	255	1
66	187.92	0.693	0	255	130.216	3825	15
67	131.544	0.132	0	255	17.362	510	2
68	158.37	0.384	0	255	60.768	1785	7
69	168.039	0.362	0	255	60.768	1785	7
70	117.893	0.368	0	255	43.405	1275	5
71	93.756	0.463	0	255	43.405	1275	5
72	20.528	0.423	0	255	8.681	255	1
73	13.107	0.662	0	255	8.681	255	1
1	66.112	0.131	0	255	8.681	255	1
2	19.201	0.452	0	255	8.681	255	1
3	79.526	0.218	0	255	17.362	510	2
4	76.564	0.227	0	255	17.362	510	2
5	119.05	0.875	0	255	104.173	3060	12
6	30.333	0	0	0	0	0	0
7	74.862	0.232	0	255	17.362	510	2
8	121.808	0.641	0	255	78.13	2295	9
9	104.548	0.332	0	255	34.724	1020	4
10	111.288	0.078	0	255	8.681	255	1
11	139.272	0.873	0	255	121.535	3570	14
12	71.117	0.732	0	255	52.087	1530	6
13	105.365	1.318	0	255	138.897	4080	16
14	91.509	0.095	0	255	8.681	255	1
15	105.501	1.152	0	255	121.535	3570	14
16	41.942	0.414	0	255	17.362	510	2
17	30.197	0.287	0	255	8.681	255	1
18	96.037	0.271	0	255	26.043	765	3
19	120.684	0.216	0	255	26.043	765	3
20	42.52	0	0	0	0	0	0
21	242.866	0.357	0	255	86.811	2550	10
22	137.536	0.379	0	255	52.087	1530	6
23	131.204	0.331	0	255	43.405	1275	5
24	67.372	0.129	0	255	8.681	255	1
25	144.174	0.963	0	255	138.897	4080	16
26	166.302	1.566	0	255	260.433	7650	30
27	153.332	0.566	0	255	86.811	2550	10
28	174.167	1.396	0	255	243.071	7140	28
29	111.39	0.234	0	255	26.043	765	3
30	158.098	1.373	0	255	217.027	6375	25
31	117.246	0.444	0	255	52.087	1530	6
32	124.225	0.14	0	255	17.362	510	2
33	91.305	0.761	0	255	69.449	2040	8
34	146.217	0.712	0	255	104.173	3060	12
35	129.944	0.868	0	255	112.854	3315	13
36	221.317	0.471	0	255	104.173	3060	12
37	71.457	0.243	0	255	17.362	510	2
38	152.277	0.171	0	255	26.043	765	3
39	119.867	0.145	0	255	17.362	510	2
40	125.416	0.346	0	255	43.405	1275	5
41	90.045	0	0	0	0	0	0
42	109.654	0.079	0	255	8.681	255	1
43	124.293	0.349	0	255	43.405	1275	5
44	50.997	0.34	0	255	17.362	510	2
45	29.039	0.598	0	255	17.362	510	2
46	64.819	0.804	0	255	52.087	1530	6
47	93.007	0.653	0	255	60.768	1785	7
48	90.794	0.669	0	255	60.768	1785	7
49	107.169	0	0	0	0	0	0
50	163.919	0.318	0	255	52.087	1530	6
51	115.612	0.3	0	255	34.724	1020	4
52	111.39	0.312	0	255	34.724	1020	4
53	6.128	0	0	0	0	0	0
54	10.077	0.861	0	255	8.681	255	1
55	97.977	0.089	0	255	8.681	255	1
56	106.658	1.058	0	255	112.854	3315	13
57	148.021	1.525	0	255	225.708	6630	26
58	92.769	0.187	0	255	17.362	510	2
59	84.496	0.308	0	255	26.043	765	3
60	61.244	0.425	0	255	26.043	765	3
61	35.712	0.243	0	255	8.681	255	1
62	9.634	0	0	0	0	0	0
1	104.752	0.912	0	255	95.492	2805	11
2	69.993	0.248	0	255	17.362	510	2
3	80.07	0.217	0	255	17.362	510	2
4	96.003	0.181	0	255	17.362	510	2
5	157.485	0.055	0	255	8.681	255	1
6	190.031	0.685	0	255	130.216	3825	15
7	62.232	0.139	0	255	8.681	255	1
8	162.183	1.124	0	255	182.303	5355	21
9	32.818	0.794	0	255	26.043	765	3
10	78.981	0.22	0	255	17.362	510	2
11	94.369	0.092	0	255	8.681	255	1
12	215.529	0.322	0	255	69.449	2040	8
13	84.496	0.411	0	255	34.724	1020	4
14	73.296	0.829	0	255	60.768	1785	7
15	61.176	0.142	0	255	8.681	255	1
16	134.472	0.065	0	255	8.681	255	1
17	79.594	0.436	0	255	34.724	1020	4
18	73.125	0.356	0	255	26.043	765	3
19	107.237	0	0	0	0	0	0
20	114.08	0.076	0	255	8.681	255	1
21	82.113	0.106	0	255	8.681	255	1
22	71.73	0.121	0	255	8.681	255	1
23	152.991	0.17	0	255	26.043	765	3
24	130.08	0.267	0	255	34.724	1020	4
25	106.318	0.572	0	255	60.768	1785	7
26	88.513	0.098	0	255	8.681	255	1
27	99.203	0.35	0	255	34.724	1020	4
28	94.981	0.091	0	255	8.681	255	1
29	215.802	0.965	0	255	208.346	6120	24
30	102.335	0.339	0	255	34.724	1020	4
31	140.668	0.247	0	255	34.724	1020	4
32	105.126	0.413	0	255	43.405	1275	5
33	162.183	1.231	0	255	199.665	5865	23
34	69.551	0.25	0	255	17.362	510	2
35	40.41	0.43	0	255	17.362	510	2
36	36.358	0.239	0	255	8.681	255	1
37	101.109	0.172	0	255	17.362	510	2
38	109.79	0.553	0	255	60.768	1785	7
39	100.564	0.432	0	255	43.405	1275	5
40	103.56	0.587	0	255	60.768	1785	7
41	166.371	1.096	0	255	182.303	5355	21
42	73.704	0.353	0	255	26.043	765	3
43	67.883	0.256	0	255	17.362	510	2
44	112.037	0.232	0	255	26.043	765	3
45	93.041	0.187	0	255	17.362	510	2
46	119.595	0.218	0	255	26.043	765	3
47	92.973	0.373	0	255	34.724	1020	4
48	129.774	0.669	0	255	86.811	2550	10
49	117.314	0.518	0	255	60.768	1785	7
50	213.214	0.733	0	255	156.26	4590	18
51	144.889	0.599	0	255	86.811	2550	10
52	38.81	0.895	0	255	34.724	1020	4
53	74.419	0.7	0	255	52.087	1530	6
54	120.242	0.361	0	255	43.405	1275	5
55	136.378	0.318	0	255	43.405	1275	5
56	103.322	0.588	0	255	60.768	1785	7
57	114.25	0.456	0	255	52.087	1530	6
58	171.477	0.962	0	255	164.941	4845	19
59	104.445	0.499	0	255	52.087	1530	6
60	84.121	0.206	0	255	17.362	510	2
61	74.487	0.699	0	255	52.087	1530	6
62	66.249	0.262	0	255	17.362	510	2
63	63.185	0.137	0	255	8.681	255	1
1	56.274	0.309	0	255	17.362	510	2
2	40.682	0	0	0	0	0	0
3	98.658	0.176	0	255	17.362	510	2
4	31.899	0.272	0	255	8.681	255	1
5	55.695	0.156	0	255	8.681	255	1
6	76.904	0.226	0	255	17.362	510	2
7	96.309	0.27	0	255	26.043	765	3
8	85.892	0.303	0	255	26.043	765	3
9	109.62	0.317	0	255	34.724	1020	4
10	69.619	0	0	0	0	0	0
11	90.317	0	0	0	0	0	0
12	49.363	0.352	0	255	17.362	510	2
13	93.79	0.093	0	255	8.681	255	1
14	75.781	0	0	0	0	0	0
15	59.202	0	0	0	0	0	0
16	31.66	0.548	0	255	17.362	510	2
17	74.964	0.116	0	255	8.681	255	1
18	75.611	0	0	0	0	0	0
19	68.427	0	0	0	0	0	0
20	61.925	0	0	0	0	0	0
21	80.104	0	0	0	0	0	0
22	66.147	0.262	0	255	17.362	510	2
23	91.441	0.095	0	255	8.681	255	1
24	52.427	0.828	0	255	43.405	1275	5
25	50.623	0.343	0	255	17.362	510	2
26	108.054	0.161	0	255	17.362	510	2
27	30.265	0	0	0	0	0	0
28	90.011	0.579	0	255	52.087	1530	6
29	111.731	0.388	0	255	43.405	1275	5
30	82.726	0.105	0	255	8.681	255	1
31	354.495	0.122	0	255	43.405	1275	5
32	145.74	0.179	0	255	26.043	765	3
33	107.714	0.322	0	255	34.724	1020	4
34	137.195	0.38	0	255	52.087	1530	6
35	37.005	0	0	0	0	0	0
36	136.753	0.19	0	255	26.043	765	3
37	79.696	0.109	0	255	8.681	255	1
38	83.509	0.104	0	255	8.681	255	1
39	164.771	0.316	0	255	52.087	1530	6
40	73.874	0.118	0	255	8.681	255	1
41	83.543	0.104	0	255	8.681	255	1
42	125.552	0.484	0	255	60.768	1785	7
43	111.697	0.078	0	255	8.681	255	1
44	60.461	0.144	0	255	8.681	255	1
45	83.611	0.311	0	255	26.043	765	3
46	90.249	0.77	0	255	69.449	2040	8
47	87.049	0.299	0	255	26.043	765	3
48	90.351	0.192	0	255	17.362	510	2
49	104.037	0	0	0	0	0	0
50	129.706	0.335	0	255	43.405	1275	5
51	71.662	0.363	0	255	26.043	765	3
52	106.148	0.409	0	255	43.405	1275	5
53	132.361	0.066	0	255	8.681	255	1
54	99.203	0.088	0	255	8.681	255	1
55	96.956	0	0	0	0	0	0
56	74.147	0.117	0	255	8.681	255	1
57	89.977	0.096	0	255	8.681	255	1
58	29.345	0	0	0	0	0	0
59	41.533	0.418	0	255	17.362	510	2
60	34.418	0.504	0	255	17.362	510	2
1	80.955	0	0	0	0	0	0
2	9.805	0	0	0	0	0	0
3	145.366	0.358	0	255	52.087	1530	6
4	94.709	0.367	0	255	34.724	1020	4
5	189.963	0.046	0	255	8.681	255	1
6	89.602	0.388	0	255	34.724	1020	4
7	150.37	0.058	0	255	8.681	255	1
8	63.389	0	0	0	0	0	0
9	133.553	0.325	0	255	43.405	1275	5
10	73.091	0.475	0	255	34.724	1020	4
11	120.174	0.289	0	255	34.724	1020	4
12	98.794	0	0	0	0	0	0
13	94.096	0.185	0	255	17.362	510	2
14	231.938	0.374	0	255	86.811	2550	10
15	188.056	0.185	0	255	34.724	1020	4
16	137.025	0.063	0	255	8.681	255	1
17	212.67	0.531	0	255	112.854	3315	13
18	82.998	0.418	0	255	34.724	1020	4
19	56.682	0	0	0	0	0	0
20	170.388	0.204	0	255	34.724	1020	4
21	167.596	0.052	0	255	8.681	255	1
22	151.187	0.574	0	255	86.811	2550	10
23	240.551	0.397	0	255	95.492	2805	11
24	184.754	0.141	0	255	26.043	765	3
25	123.101	0	0	0	0	0	0
26	123.816	0.21	0	255	26.043	765	3
27	65.772	0.132	0	255	8.681	255	1
28	205.384	0.592	0	255	121.535	3570	14
29	154.626	0.337	0	255	52.087	1530	6
30	243.683	0.891	0	255	217.027	6375	25
31	138.149	0.189	0	255	26.043	765	3
32	149.928	0.116	0	255	17.362	510	2
33	191.29	0.454	0	255	86.811	2550	10
34	117.927	0.074	0	255	8.681	255	1
35	140.702	0.185	0	255	26.043	765	3
36	83.27	0	0	0	0	0	0
37	70.776	0	0	0	0	0	0
38	18.894	0	0	0	0	0	0
39	71.9	0.121	0	255	8.681	255	1
40	136.48	0.127	0	255	17.362	510	2
41	69.006	0	0	0	0	0	0
42	78.47	0	0	0	0	0	0
43	110.607	0.157	0	255	17.362	510	2
44	79.015	0	0	0	0	0	0
45	52.631	0	0	0	0	0	0
46	123.986	0.14	0	255	17.362	510	2
47	5.549	0	0	0	0	0	0
48	37.38	0	0	0	0	0	0
49	152.855	0.341	0	255	52.087	1530	6
50	66.215	0.262	0	255	17.362	510	2
51	98.25	0.353	0	255	34.724	1020	4
52	64.615	0.134	0	255	8.681	255	1
53	129.433	0.067	0	255	8.681	255	1
54	33.533	0.259	0	255	8.681	255	1

## Sheet: SCR Fasudil
	Area	Mean	Min	Max	IntDen	RawIntDen	number of Foci
1	145.4	0.239	0	255	34.724	1020	1
2	121.467	0.214	0	255	26.043	765	3
3	104.479	0.083	0	255	8.681	255	1
4	128.038	0.068	0	255	8.681	255	1
5	125.042	0.139	0	255	17.362	510	2
6	99.101	0.088	0	255	8.681	255	1
7	155.749	0.056	0	255	8.681	255	1
8	127.697	0.204	0	255	26.043	765	3
9	119.833	0.072	0	255	8.681	255	1
10	85.143	0.102	0	255	8.681	255	1
11	9.566	0	0	0	0	0	0
12	111.084	0.234	0	255	26.043	765	3
13	96.513	0.27	0	255	26.043	765	3
14	153.434	0.057	0	255	8.681	255	1
15	96.309	0.18	0	255	17.362	510	2
16	122.523	0.213	0	255	26.043	765	3
17	84.564	0.205	0	255	17.362	510	2
18	43.882	0.198	0	255	8.681	255	1
1	47.389	0.183	0	255	8.681	255	1
2	48.069	0	0	0	0	0	0
3	26.248	0	0	0	0	0	0
4	122.999	0.071	0	255	8.681	255	1
5	123.067	0.071	0	255	8.681	255	1
6	76.734	0.226	0	255	17.362	510	2
7	96.547	0.09	0	255	8.681	255	1
8	29.073	0	0	0	0	0	0
9	127.084	0.068	0	255	8.681	255	1
10	91.917	0.472	0	255	43.405	1275	5
11	78.402	0.111	0	255	8.681	255	1
12	95.764	0.725	0	255	69.449	2040	8
13	105.126	0	0	0	0	0	0
14	100.19	0.347	0	255	34.724	1020	4
15	84.258	0.103	0	255	8.681	255	1
16	104.548	0.166	0	255	17.362	510	2
17	137.536	0.126	0	255	17.362	510	2
18	134.948	0.064	0	255	8.681	255	1
19	153.468	0.283	0	255	43.405	1275	3
20	104.139	0.167	0	255	17.362	510	2
21	206.576	0.336	0	255	69.449	2040	8
22	144.481	0.3	0	255	43.405	1275	5
23	121.535	0.143	0	255	17.362	510	2
24	179.954	0.241	0	255	43.405	1275	5
25	147.51	0.353	0	255	52.087	1530	6
26	97.262	0	0	0	0	0	0
27	6.264	0	0	0	0	0	0
28	9.532	0	0	0	0	0	0
29	103.901	0.251	0	255	26.043	765	3
30	50.929	0	0	0	0	0	0
31	132.429	0.066	0	255	8.681	255	1
32	97.705	0	0	0	0	0	0
33	80.853	0.107	0	255	8.681	255	1
34	73.432	0	0	0	0	0	0
35	90.624	0.096	0	255	8.681	255	1
36	120.582	0.072	0	255	8.681	255	1
37	94.232	0.184	0	255	17.362	510	2
38	171.511	0.152	0	255	26.043	765	0
39	153.434	0.057	0	255	8.681	255	1
40	95.015	0.091	0	255	8.681	255	1
41	109.382	0.079	0	255	8.681	255	1
42	83.134	0.104	0	255	8.681	255	1
43	128.582	0.203	0	255	26.043	765	3
44	123.646	0	0	0	0	0	0
45	33.873	0	0	0	0	0	0
46	29.856	0	0	0	0	0	0
1	113.331	0.23	0	255	26.043	765	3
2	74.045	0.117	0	255	8.681	255	1
3	195.852	0.089	0	255	17.362	510	2
4	268.91	0.226	0	255	60.768	1785	7
5	128.276	0.338	0	255	43.405	1275	5
6	128.889	0.202	0	255	26.043	765	3
7	245.658	0	0	0	0	0	0
8	104.139	0.167	0	255	17.362	510	2
9	162.013	0	0	0	0	0	0
10	279.293	0	0	0	0	0	0
1	187.648	0.185	0	255	34.724	1020	4
2	112.003	0	0	0	0	0	0
3	147.408	0.118	0	255	17.362	510	2
4	123.544	0.07	0	255	8.681	255	1
5	6.026	0	0	0	0	0	0
6	148.191	0.059	0	255	8.681	255	1
7	110.709	0	0	0	0	0	0
8	99.747	0.087	0	255	8.681	255	1
9	173.452	0.3	0	255	52.087	1530	6
10	131.782	0.263	0	255	34.724	1020	4
11	95.594	0.091	0	255	8.681	255	1
12	105.705	0.164	0	255	17.362	510	2
13	131.987	0.395	0	255	52.087	1530	6
14	117.348	0.074	0	255	8.681	255	1
15	74.113	0.234	0	255	17.362	510	2
16	111.322	0.156	0	255	17.362	510	2
17	152.855	0	0	0	0	0	0
18	154.455	0.056	0	255	8.681	255	1
19	122.114	0.071	0	255	8.681	255	1
20	124.02	0.07	0	255	8.681	255	1
21	104.343	0.083	0	255	8.681	255	1
22	95.288	0.091	0	255	8.681	255	1
1	159.017	0.328	0	255	52.087	1530	6
2	99.169	0.35	0	255	34.724	1020	4
3	159.664	0.109	0	255	17.362	510	2
4	127.867	0.068	0	255	8.681	255	1
5	138.012	0.126	0	255	17.362	510	2
6	110.063	0.158	0	255	17.362	510	2
7	149.723	0.058	0	255	8.681	255	1
8	114.046	0.228	0	255	26.043	765	3
9	113.841	0.153	0	255	17.362	510	2
10	119.016	0.292	0	255	34.724	1020	4
11	118.88	0.219	0	255	26.043	765	3
12	116.259	0.149	0	255	17.362	510	2
13	114.114	0.152	0	255	17.362	510	2
14	94.845	0.092	0	255	8.681	255	1
15	169.911	0.051	0	255	8.681	255	1
16	162.558	0.214	0	255	34.724	1020	4
17	58.146	0	0	0	0	0	0
18	107.816	0.242	0	255	26.043	765	3
19	124.531	0.07	0	255	8.681	255	1
20	66.078	0	0	0	0	0	0
21	148.123	0	0	0	0	0	0
22	102.267	0.085	0	255	8.681	255	1
23	157.077	0.221	0	255	34.724	1020	4
24	126.948	0	0	0	0	0	0
25	99.305	0.175	0	255	17.362	510	2
26	130.965	0.265	0	255	34.724	1020	2
27	116.497	0.149	0	255	17.362	510	2
28	61.21	0	0	0	0	0	0
29	63.661	0.136	0	255	8.681	255	1
30	15.762	0.551	0	255	8.681	255	1

## Sheet: SCR NT
	Area	Mean	Min	Max	IntDen	RawIntDen	number of Foci
1	99.679	0	0	0	0	0	0
2	88.173	0.492	0	255	43.405	1275	5
3	14.741	0	0	0	0	0	0
4	96.752	0	0	0	0	0	0
5	126.472	0.275	0	255	34.724	1020	4
6	96.479	0.09	0	255	8.681	255	1
7	118.846	0.073	0	255	8.681	255	1
8	51.372	0.169	0	255	8.681	255	1
9	39.286	0	0	0	0	0	0
10	12.017	0.722	0	255	8.681	255	1
11	81.636	0.106	0	255	8.681	255	1
12	67.372	0.129	0	255	8.681	255	1
13	135.459	0.385	0	255	52.087	1530	6
14	131.748	0.132	0	255	17.362	510	2
15	84.973	0.306	0	255	26.043	765	3
16	70.232	0.124	0	255	8.681	255	1
17	67.849	0.128	0	255	8.681	255	1
18	62.129	0.14	0	255	8.681	255	1
19	95.56	0.091	0	255	8.681	255	1
20	87.185	0.1	0	255	8.681	255	1
21	95.764	0.272	0	255	26.043	765	3
22	146.523	0.592	0	255	86.811	2550	10
23	99.577	0.61	0	255	60.768	1785	7
24	89.398	0.291	0	255	26.043	765	3
25	157.519	0.055	0	255	8.681	255	1
26	127.255	0.068	0	255	8.681	255	1
27	56.41	0	0	0	0	0	0
28	31.899	0	0	0	0	0	0
29	269.352	0.161	0	255	43.405	1275	5
30	129.229	0.067	0	255	8.681	255	1
31	146.115	0.059	0	255	8.681	255	1
32	109.177	0.08	0	255	8.681	255	1
33	118.335	0.147	0	255	17.362	510	2
34	76.291	0.228	0	255	17.362	510	2
35	91.237	0	0	0	0	0	0
36	154.762	0.168	0	255	26.043	765	3
37	134.404	0.129	0	255	17.362	510	2
38	61.823	0	0	0	0	0	0
39	152.651	0	0	0	0	0	0
40	167.596	0	0	0	0	0	0
41	96.956	0.09	0	255	8.681	255	1
42	116.701	0.074	0	255	8.681	255	1
43	112.854	0.077	0	255	8.681	255	1
44	172.635	0	0	0	0	0	0
45	161.468	0.054	0	255	8.681	255	1
46	148.396	0.058	0	255	8.681	255	1
47	60.563	0.143	0	255	8.681	255	1
1	43.814	0.198	0	255	8.681	255	1
2	143.221	0.061	0	255	8.681	255	1
3	80.547	0.108	0	255	8.681	255	1
4	155.102	0	0	0	0	0	0
5	118.437	0.073	0	255	8.681	255	1
6	91.781	0.095	0	255	8.681	255	1
7	104.411	0	0	0	0	0	0
8	113.092	0.077	0	255	8.681	255	1
9	215.734	0.121	0	255	26.043	765	3
10	165.894	0.262	0	255	43.405	1275	5
11	181.043	0.144	0	255	26.043	765	3
12	46.027	0.189	0	255	8.681	255	1
13	107.101	0.081	0	255	8.681	255	1
14	68.53	0.253	0	255	17.362	510	2
15	130.08	0.067	0	255	8.681	255	1
16	112.718	0.231	0	255	26.043	765	3
17	97.603	0	0	0	0	0	0
18	145.57	0.119	0	255	17.362	510	2
19	145.502	0.239	0	255	34.724	1020	4
20	92.939	0.093	0	255	8.681	255	1
21	102.675	0	0	0	0	0	0
22	92.122	0.094	0	255	8.681	255	1
23	28.426	0	0	0	0	0	0
24	91.168	0.095	0	255	8.681	255	1
25	74.419	0.117	0	255	8.681	255	1
26	67.644	0.128	0	255	8.681	255	1
27	64.819	0.134	0	255	8.681	255	1
28	80.479	0.216	0	255	17.362	510	2
29	110.369	0.079	0	255	8.681	255	1
30	103.424	0.168	0	255	17.362	510	2
31	67.713	0	0	0	0	0	0
32	66.998	0.259	0	255	17.362	510	2
33	99.203	0.088	0	255	8.681	255	1
34	69.789	0.124	0	255	8.681	255	1
35	92.462	0.094	0	255	8.681	255	1
36	143.698	0.06	0	255	8.681	255	1
37	59.065	0.147	0	255	8.681	255	1
38	16.749	0	0	0	0	0	0
1	62.402	0.278	0	255	17.362	510	2
2	72.513	0.239	0	255	17.362	510	2
3	43.644	0	0	0	0	0	0
4	174.575	0.05	0	255	8.681	255	1
5	40.614	0.214	0	255	8.681	255	1
6	100.837	0.086	0	255	8.681	255	1
7	58.521	0.148	0	255	8.681	255	1
8	63.151	0.137	0	255	8.681	255	1
9	69.313	0	0	0	0	0	0
10	128.208	0	0	0	0	0	0
11	101.892	0.085	0	255	8.681	255	1
12	79.492	0.109	0	255	8.681	255	1
13	77.551	0.112	0	255	8.681	255	1
14	148.94	0.291	0	255	43.405	1275	5
15	78.096	0.111	0	255	8.681	255	1
16	49.159	0.177	0	255	8.681	255	1
17	52.291	0	0	0	0	0	0
18	114.488	0.152	0	255	17.362	510	2
19	93.654	0.371	0	255	34.724	1020	4
20	128.242	0.135	0	255	17.362	510	2
21	143.323	0	0	0	0	0	0
22	95.458	0	0	0	0	0	0
23	136.004	0.128	0	255	17.362	510	2
24	28.767	0.302	0	255	8.681	255	1
25	116.361	0.149	0	255	17.362	510	2
26	120.48	0.144	0	255	17.362	510	2
27	105.977	0.164	0	255	17.362	510	2
28	162.013	0.161	0	255	26.043	765	3
29	39.388	0	0	0	0	0	0
30	74.317	0.117	0	255	8.681	255	1
31	16.954	0	0	0	0	0	0
32	122.693	0.071	0	255	8.681	255	1
33	96.105	0.181	0	255	17.362	510	2
34	51.848	0.167	0	255	8.681	255	1
35	24.92	0	0	0	0	0	0
1	116.156	0.299	0	255	34.724	1020	4
2	93.449	0.093	0	255	8.681	255	1
3	74.079	0.117	0	255	8.681	255	1
4	66.215	0.524	0	255	34.724	1020	4
5	6.094	0	0	0	0	0	0
6	68.7	0.253	0	255	17.362	510	2
7	121.74	0.285	0	255	34.724	1020	4
8	66.895	0.26	0	255	17.362	510	2
9	52.563	0.165	0	255	8.681	255	1
10	113.365	0.613	0	255	69.449	2040	8
11	164.702	0.316	0	255	52.087	1530	6
12	72.308	0.12	0	255	8.681	255	1
13	229.691	0.34	0	255	78.13	2295	9
14	71.219	0.488	0	255	34.724	1020	4
15	96.82	0.09	0	255	8.681	255	1
16	66.419	0.261	0	255	17.362	510	2
17	143.391	0.242	0	255	34.724	1020	4
18	79.628	0.109	0	255	8.681	255	1
19	170.354	0.357	0	255	60.768	1785	7
20	194.388	0.223	0	255	43.405	1275	5
21	116.327	0.075	0	255	8.681	255	1
22	26.588	0.327	0	255	8.681	255	1
23	57.602	0.151	0	255	8.681	255	1
24	164.975	0.158	0	255	26.043	765	3
25	93.96	0.092	0	255	8.681	255	1
26	254.679	0.341	0	255	86.811	2550	10
27	144.481	0.12	0	255	17.362	510	2
28	119.731	0.29	0	255	34.724	1020	4
29	86.777	0.2	0	255	17.362	510	2
30	146.659	0.296	0	255	43.405	1275	5
31	198.303	0.131	0	255	26.043	765	3
32	137.91	0.252	0	255	34.724	1020	4
33	104.173	0.083	0	255	8.681	255	1
34	74.385	0.117	0	255	8.681	255	1
35	122.557	0.142	0	255	17.362	510	2
36	226.798	0.115	0	255	26.043	765	3
37	129.536	0.201	0	255	26.043	765	3
38	216.449	0.08	0	255	17.362	510	2
39	31.763	0	0	0	0	0	0
1	6.434	1.349	0	255	8.681	255	1
2	139.953	0.186	0	255	26.043	765	3
3	11.813	0	0	0	0	0	0
4	11.745	0	0	0	0	0	0
5	106.114	0.491	0	255	52.087	1530	6
6	67.236	0.129	0	255	8.681	255	1
7	88.547	0.196	0	255	17.362	510	2
8	35.814	0	0	0	0	0	0
9	136.583	0.318	0	255	43.405	1275	5
10	86.062	0.403	0	255	34.724	1020	4
11	108.429	0.24	0	255	26.043	765	3
12	137.331	0.506	0	255	69.449	2040	8
13	106.794	0.65	0	255	69.449	2040	8
14	109.892	0.237	0	255	26.043	765	3
15	115.918	0.3	0	255	34.724	1020	4
16	148.6	0.584	0	255	86.811	2550	10
17	135.8	0.32	0	255	43.405	1275	5
18	154.421	0.337	0	255	52.087	1530	6
19	104.411	0.083	0	255	8.681	255	1
20	146.489	0.237	0	255	34.724	1020	4
21	101.552	0.427	0	255	43.405	1275	5
22	127.731	0.612	0	255	78.13	2295	9
23	147.51	0.353	0	255	52.087	1530	6
24	139.272	0.187	0	255	26.043	765	3
25	157.928	0.33	0	255	52.087	1530	6
26	163.409	0.372	0	255	60.768	1785	7
27	51.848	0.335	0	255	17.362	510	2

## Sheet: SCR Ola
	Area	Mean	Min	Max	IntDen	RawIntDen	number of Foci
1	108.258	0.321	0	255	34.724	1020	4
2	29.618	0	0	0	0	0	0
3	30.877	0	0	0	0	0	0
4	93.994	0	0	0	0	0	0
5	85.007	0	0	0	0	0	0
6	383.092	0.045	0	255	17.362	510	2
7	101.518	0	0	0	0	0	0
8	111.969	0	0	0	0	0	0
9	113.024	0.154	0	255	17.362	510	2
10	91.305	0.095	0	255	8.681	255	1
11	132.804	0.065	0	255	8.681	255	1
12	140.157	0.062	0	255	8.681	255	1
13	99.747	0.087	0	255	8.681	255	1
14	116.667	0	0	0	0	0	0
15	114.693	0.076	0	255	8.681	255	1
16	120.752	0.072	0	255	8.681	255	1
17	157.281	0.166	0	255	26.043	765	3
18	134.744	0.193	0	255	26.043	765	3
19	113.093	0.077	0	255	8.681	255	1
20	144.855	0	0	0	0	0	0
21	107.884	0	0	0	0	0	0
22	96.139	0.181	0	255	17.362	510	2
23	101.109	0.086	0	255	8.681	255	1
24	62.674	0.416	0	255	26.043	765	3
25	180.669	0.192	0	255	34.724	1020	4
26	94.607	0.367	0	255	34.724	1020	4
27	108.054	0.08	0	255	8.681	255	1
28	112.514	0.231	0	255	26.043	765	3
29	91.339	0	0	0	0	0	0
30	74.998	0	0	0	0	0	0
31	103.288	0.168	0	255	17.362	510	2
32	72.513	0.12	0	255	8.681	255	1
33	76.972	0.113	0	255	8.681	255	1
34	77.721	0	0	0	0	0	0
35	71.355	0	0	0	0	0	0
36	77.619	0	0	0	0	0	0
37	118.744	0	0	0	0	0	0
38	182.031	0.048	0	255	8.681	255	1
39	101.075	0.086	0	255	8.681	255	1
40	144.038	0	0	0	0	0	0
41	80.479	0.108	0	255	8.681	255	1
42	107.441	0	0	0	0	0	0
43	134.676	0.193	0	255	26.043	765	3
1	37.38	0	0	0	0	0	0
2	197.01	0.176	0	255	34.724	1020	4
3	15.013	0.578	0	255	8.681	255	1
4	101.075	0.172	0	255	17.362	510	2
5	82.59	0.105	0	255	8.681	255	1
6	176.856	0.147	0	255	26.043	765	3
7	134.914	0	0	0	0	0	0
8	144.583	0.24	0	255	34.724	1020	4
9	185.878	0.14	0	255	26.043	765	3
10	143.255	0.242	0	255	34.724	1020	4
11	138.217	0.251	0	255	34.724	1020	4
12	173.656	0.2	0	255	34.724	1020	4
13	100.871	0	0	0	0	0	0
14	217.947	0.04	0	255	8.681	255	1
15	76.36	0.455	0	255	34.724	1020	4
16	108.905	0.159	0	255	17.362	510	2
17	89.603	0.097	0	255	8.681	255	1
18	152.719	0.227	0	255	34.724	1020	4
19	151.664	0.172	0	255	26.043	765	3
20	186.967	0.139	0	255	26.043	765	3
21	8.409	0	0	0	0	0	0
22	109.041	0.08	0	255	8.681	255	1
23	96.956	0	0	0	0	0	0
24	172.362	0.353	0	255	60.768	1785	7
25	79.594	0	0	0	0	0	0
26	145.842	0.06	0	255	8.681	255	1
27	109.178	0.08	0	255	8.681	255	1
28	24.307	0	0	0	0	0	0
29	99.509	0.087	0	255	8.681	255	1
30	100.599	0.086	0	255	8.681	255	1
31	134.302	0.129	0	255	17.362	510	2
32	147.476	0	0	0	0	0	0
33	110.846	0.078	0	255	8.681	255	1
34	19.303	0	0	0	0	0	0
1	87.866	0	0	0	0	0	0
2	106.624	0.081	0	255	8.681	255	1
3	100.769	0.086	0	255	8.681	255	1
4	124.361	0.209	0	255	26.043	765	3
5	167.324	0.208	0	255	34.724	1020	4
6	127.187	0	0	0	0	0	0
7	134.744	0	0	0	0	0	0
8	136.344	0.127	0	255	17.362	510	2
9	387.585	0.045	0	255	17.362	510	2
10	147.238	0.236	0	255	34.724	1020	4
11	134.438	0.065	0	255	8.681	255	1
12	130.727	0	0	0	0	0	0
13	143.221	0.061	0	255	8.681	255	1
14	168.379	0.052	0	255	8.681	255	1
15	136.514	0.254	0	255	34.724	1020	4
16	129.059	0.067	0	255	8.681	255	1
17	824.159	0.063	0	255	52.087	1530	6
18	116.327	0.075	0	255	8.681	255	1
19	181.52	0	0	0	0	0	0
20	161.332	0.108	0	255	17.362	510	2
21	126.71	0.069	0	255	8.681	255	1
22	185.912	0.047	0	255	8.681	255	1
23	328.077	0.026	0	255	8.681	255	1
24	182.677	0	0	0	0	0	0
25	119.765	0.072	0	255	8.681	255	1
26	216.21	0.281	0	255	60.768	1785	7
27	75.372	0.115	0	255	8.681	255	1

## Sheet: BRCA2 Fasudil
	Area	Mean	Min	Max	IntDen	RawIntDen	number of Foci
1	34.214	0.254	0	255	8.681	255	1
2	60.495	0	0	0	0	0	0
3	43.235	0	0	0	0	0	0
4	108.224	0.08	0	255	8.681	255	1
5	75.304	0.115	0	255	8.681	255	1
6	70.879	0.122	0	255	8.681	255	1
7	36.12	0	0	0	0	0	0
8	99.339	0	0	0	0	0	0
9	51.678	0	0	0	0	0	0
10	134.88	0	0	0	0	0	0
11	148.123	0	0	0	0	0	0
12	101.416	0.086	0	255	8.681	255	1
13	90.249	0.096	0	255	8.681	255	1
14	105.943	0.164	0	255	17.362	510	2
15	133.621	0.065	0	255	8.681	255	1
16	54.606	0	0	0	0	0	0
17	64.342	0.135	0	255	8.681	255	1
18	117.007	0.074	0	255	8.681	255	1
19	151.936	0.229	0	255	34.724	1020	4
20	122.761	0.071	0	255	8.681	255	1
21	147.953	0.059	0	255	8.681	255	1
22	40.648	0.214	0	255	8.681	255	1
23	45.72	0	0	0	0	0	0
24	141.621	0.061	0	255	8.681	255	1
25	130.284	0.067	0	255	8.681	255	1
26	136.821	0.063	0	255	8.681	255	1
27	64.785	0	0	0	0	0	0
28	103.458	0.168	0	255	17.362	510	2
29	147.579	0.059	0	255	8.681	255	1
30	105.841	0.082	0	255	8.681	255	1
31	68.972	0.126	0	255	8.681	255	1
32	67.508	0.129	0	255	8.681	255	1
33	113.161	0.077	0	255	8.681	255	1
34	117.995	0.221	0	255	26.043	765	3
35	48.206	0.54	0	255	26.043	765	3
36	47.695	0	0	0	0	0	0
37	9.77	0	0	0	0	0	0
1	46.776	0	0	0	0	0	0
2	55.457	0	0	0	0	0	0
3	8.681	0	0	0	0	0	0
4	7.183	0	0	0	0	0	0
5	41.295	0.21	0	255	8.681	255	1
6	35.814	0	0	0	0	0	0
7	49.772	0.174	0	255	8.681	255	1
8	31.831	0	0	0	0	0	0
9	17.464	0	0	0	0	0	0
10	56.376	0	0	0	0	0	0
11	45.21	0	0	0	0	0	0
12	164.975	0.105	0	255	17.362	510	2
13	114.352	0.076	0	255	8.681	255	1
14	7.83	1.109	0	255	8.681	255	1
15	39.865	0	0	0	0	0	0
16	67.406	0	0	0	0	0	0
17	40.069	0.433	0	255	17.362	510	2
18	37.652	0	0	0	0	0	0
19	63.423	0	0	0	0	0	0
20	92.598	0	0	0	0	0	0
21	61.857	0	0	0	0	0	0
22	144.242	0.12	0	255	17.362	510	2
23	100.837	0.086	0	255	8.681	255	1
24	98.352	0.088	0	255	8.681	255	1
25	81.534	0.106	0	255	8.681	255	1
26	134.438	0.129	0	255	17.362	510	2
27	138.591	0.063	0	255	8.681	255	1
28	142.642	0	0	0	0	0	0
29	109.62	0.158	0	255	17.362	510	2
30	6.196	0	0	0	0	0	0
31	79.526	0	0	0	0	0	0
32	81.5	0	0	0	0	0	0
33	127.629	0.068	0	255	8.681	255	1
34	102.437	0	0	0	0	0	0
35	160.447	0.108	0	255	17.362	510	2
36	157.553	0.275	0	255	43.405	1275	5
37	123.884	0.07	0	255	8.681	255	1
38	108.394	0	0	0	0	0	0
39	115.816	0	0	0	0	0	0
40	70.027	0.124	0	255	8.681	255	1
41	99.475	0.087	0	255	8.681	255	1
42	121.535	0	0	0	0	0	0
43	92.394	0.188	0	255	17.362	510	2
44	195.682	0	0	0	0	0	0
45	107.952	0	0	0	0	0	0
46	166.677	0.052	0	255	8.681	255	1
47	113.399	0.23	0	255	26.043	765	3
48	42.52	0.204	0	255	8.681	255	1
49	27.95	0.311	0	255	8.681	255	1
50	94.811	0	0	0	0	0	0
1	145.4	0.06	0	255	8.681	255	1
2	37.686	0	0	0	0	0	0
3	134.948	0.064	0	255	8.681	255	1
4	49.704	0	0	0	0	0	0
5	76.121	0.114	0	255	8.681	255	1
6	100.53	0.086	0	255	8.681	255	1
7	56.274	0	0	0	0	0	0
8	77.279	0	0	0	0	0	0
9	111.526	0	0	0	0	0	0
10	79.798	0.218	0	255	17.362	510	2
11	39.967	0	0	0	0	0	0
12	75.679	0.115	0	255	8.681	255	1
13	94.369	0	0	0	0	0	0
14	64.955	0	0	0	0	0	0
15	98.896	0.088	0	255	8.681	255	1
16	26.962	0.322	0	255	8.681	255	1
17	90.624	0.096	0	255	8.681	255	1
18	90.828	0.096	0	255	8.681	255	1
19	90.045	0.193	0	255	17.362	510	2
20	96.105	0.09	0	255	8.681	255	1
21	77.721	0.112	0	255	8.681	255	1
22	64.308	0.27	0	255	17.362	510	2
23	102.709	0.085	0	255	8.681	255	1
24	62.3	0.139	0	255	8.681	255	1
25	51.508	0.506	0	255	26.043	765	3
26	75.815	0.115	0	255	8.681	255	1
27	78.3	0.111	0	255	8.681	255	1
28	95.39	0.273	0	255	26.043	765	3
29	55.355	0.314	0	255	17.362	510	2
30	65.159	0.133	0	255	8.681	255	1
31	77.347	0	0	0	0	0	0
32	84.496	0.103	0	255	8.681	255	1
33	121.059	0.072	0	255	8.681	255	1
34	92.973	0.093	0	255	8.681	255	1
35	5.651	0	0	0	0	0	0
36	83.066	0.209	0	255	17.362	510	2
37	106.59	0.244	0	255	26.043	765	3
38	155.681	0.056	0	255	8.681	255	1
39	63.627	0.136	0	255	8.681	255	1
40	164.362	0.158	0	255	26.043	765	3
41	57.159	0	0	0	0	0	0
42	15.558	0	0	0	0	0	0
1	71.01	0	0	0	0	0	0
2	111.49	0.16	0	255	17.36	510	2
3	84.7	0	0	0	0	0	0
4	123.31	0.07	0	255	8.68	255	1
5	66.52	0	0	0	0	0	0
6	139.71	0.12	0	255	17.36	510	2
7	88.21	0.1	0	255	8.68	255	1
8	26.42	0	0	0	0	0	0
9	15.93	0	0	0	0	0	0
10	112.68	0	0	0	0	0	0
11	81.74	0.11	0	255	8.68	255	1
12	104.58	0.25	0	255	26.04	765	3
13	12.6	0	0	0	0	0	0
14	113.09	0.08	0	255	8.68	255	1
15	117.96	0	0	0	0	0	0
16	86.4	0.1	0	255	8.68	255	1
17	167.8	0.05	0	255	8.68	255	1
18	94.2	0	0	0	0	0	0
19	8.68	0	0	0	0	0	0
20	114.86	0.08	0	255	8.68	255	1
21	80.89	0.11	0	255	8.68	255	1
22	156.29	0.06	0	255	8.68	255	1
23	130.76	0	0	0	0	0	0
24	88.75	0.1	0	255	8.68	255	1
25	157.21	0.11	0	255	17.36	510	2
26	50.38	0	0	0	0	0	0
27	63.25	0	0	0	0	0	0
28	141.72	0.06	0	255	8.68	255	1
29	74.08	0	0	0	0	0	0
30	84.02	0.1	0	255	8.68	255	1
31	45.35	0	0	0	0	0	0
1	61.79	0.14	0	255	8.68	255	1
2	26.18	0.33	0	255	8.68	255	1
3	99.92	0.43	0	255	43.41	1275	5
4	94.33	0.28	0	255	26.04	765	3
5	47.15	0	0	0	0	0	0
6	117.35	0.07	0	255	8.68	255	1
7	63.22	0.14	0	255	8.68	255	1
8	53.11	0.16	0	255	8.68	255	1
9	77.76	0.11	0	255	8.68	255	1
10	89.13	0.19	0	255	17.36	510	2
11	18.69	0	0	0	0	0	0
12	86.4	0.1	0	255	8.68	255	1
13	78.98	0.22	0	255	17.36	510	2
14	38.03	0	0	0	0	0	0
15	63.9	0.41	0	255	26.04	765	3
16	89.6	0.1	0	255	8.68	255	1
17	44.26	0.2	0	255	8.68	255	1
18	171.17	0.2	0	255	34.72	1020	4
19	65.26	0.13	0	255	8.68	255	1
20	47.66	0.18	0	255	8.68	255	1
21	31.93	0	0	0	0	0	0
22	87.29	0.1	0	255	8.68	255	1
23	70.23	0	0	0	0	0	0
24	129.37	0.2	0	255	26.04	765	3
25	16.55	0	0	0	0	0	0
26	89.02	0.29	0	255	26.04	765	3
27	70.5	0	0	0	0	0	0
28	79.63	0	0	0	0	0	0
29	26.59	0	0	0	0	0	0
30	11.68	0	0	0	0	0	0
31	96.79	0.18	0	255	17.36	510	2
32	120.31	0.14	0	255	17.36	510	2
33	36.05	0	0	0	0	0	0
34	35.61	0	0	0	0	0	0
35	71.7	0.24	0	255	17.36	510	2
36	91.54	0.09	0	255	8.68	255	1
37	127.9	0	0	0	0	0	0
38	14.95	0	0	0	0	0	0
39	86.16	0.1	0	255	8.68	255	1
40	75.95	0	0	0	0	0	0
41	77.48	0	0	0	0	0	0
42	95.36	0	0	0	0	0	0
43	80.41	0.11	0	255	8.68	255	1
44	101.52	0	0	0	0	0	0
45	63.59	0.14	0	255	8.68	255	1
46	107.03	0.08	0	255	8.68	255	1
47	107.68	0.4	0	255	43.41	1275	5
48	131.71	0.26	0	255	34.72	1020	4
49	112.31	0.08	0	255	8.68	255	1
50	114.62	0.08	0	255	8.68	255	1
51	75.64	0.11	0	255	8.68	255	1
52	124.6	0.28	0	255	34.72	1020	4
53	100.9	0.26	0	255	26.04	765	3
54	6.81	0	0	0	0	0	0
55	56.04	0.15	0	255	8.68	255	1
56	121.67	0	0	0	0	0	0
57	23.35	0	0	0	0	0	0
58	70.2	0	0	0	0	0	0
59	106.86	0	0	0	0	0	0
60	109.93	0	0	0	0	0	0
61	122.69	0.07	0	255	8.68	255	1
62	52.9	0.33	0	255	17.36	510	2
63	41.23	0	0	0	0	0	0
64	91.51	0.09	0	255	8.68	255	1
65	32.51	0	0	0	0	0	0
66	39.01	0	0	0	0	0	0
67	124.97	0	0	0	0	0	0
68	72.92	0.12	0	255	8.68	255	1
69	44.56	0.19	0	255	8.68	255	1
70	93.59	0	0	0	0	0	0
71	45.35	0.19	0	255	8.68	255	1
72	100.9	0.09	0	255	8.68	255	1
73	92.94	0.19	0	255	17.36	510	2
74	29.65	0	0	0	0	0	0
75	5.31	0	0	0	0	0	0
1	61.79	0.14	0	255	8.68	255	1
2	26.18	0.33	0	255	8.68	255	1
3	99.92	0.43	0	255	43.41	1275	5
4	94.33	0.28	0	255	26.04	765	3
5	47.15	0	0	0	0	0	0
6	117.35	0.07	0	255	8.68	255	1
7	63.22	0.14	0	255	8.68	255	1
8	53.11	0.16	0	255	8.68	255	1
9	77.76	0.11	0	255	8.68	255	1
10	89.13	0.19	0	255	17.36	510	2
11	18.69	0	0	0	0	0	0
12	86.4	0.1	0	255	8.68	255	1
13	78.98	0.22	0	255	17.36	510	2
14	38.03	0	0	0	0	0	0
15	63.9	0.41	0	255	26.04	765	3
16	89.6	0.1	0	255	8.68	255	1
17	44.26	0.2	0	255	8.68	255	1
18	171.17	0.2	0	255	34.72	1020	4
19	65.26	0.13	0	255	8.68	255	1
20	47.66	0.18	0	255	8.68	255	1
21	31.93	0	0	0	0	0	0
22	87.29	0.1	0	255	8.68	255	1
23	70.23	0	0	0	0	0	0
24	129.37	0.2	0	255	26.04	765	3
25	16.55	0	0	0	0	0	0
26	89.02	0.29	0	255	26.04	765	3
27	70.5	0	0	0	0	0	0
28	79.63	0	0	0	0	0	0
29	26.59	0	0	0	0	0	0
30	11.68	0	0	0	0	0	0
31	96.79	0.18	0	255	17.36	510	2
32	120.31	0.14	0	255	17.36	510	2
33	36.05	0	0	0	0	0	0
34	35.61	0	0	0	0	0	0
35	71.7	0.24	0	255	17.36	510	2
36	91.54	0.09	0	255	8.68	255	1
37	127.9	0	0	0	0	0	0
38	14.95	0	0	0	0	0	0
39	86.16	0.1	0	255	8.68	255	1
40	75.95	0	0	0	0	0	0
41	77.48	0	0	0	0	0	0
42	95.36	0	0	0	0	0	0
43	80.41	0.11	0	255	8.68	255	1
44	101.52	0	0	0	0	0	0
45	63.59	0.14	0	255	8.68	255	1
46	107.03	0.08	0	255	8.68	255	1
47	107.68	0.4	0	255	43.41	1275	5
48	131.71	0.26	0	255	34.72	1020	4
49	112.31	0.08	0	255	8.68	255	1
50	114.62	0.08	0	255	8.68	255	1
51	75.64	0.11	0	255	8.68	255	1
52	124.6	0.28	0	255	34.72	1020	4
53	100.9	0.26	0	255	26.04	765	3
54	6.81	0	0	0	0	0	0
55	56.04	0.15	0	255	8.68	255	1
56	121.67	0	0	0	0	0	0
57	23.35	0	0	0	0	0	0
58	70.2	0	0	0	0	0	0
59	106.86	0	0	0	0	0	0
60	109.93	0	0	0	0	0	0
61	122.69	0.07	0	255	8.68	255	1
62	52.9	0.33	0	255	17.36	510	2
63	41.23	0	0	0	0	0	0
64	91.51	0.09	0	255	8.68	255	1
65	32.51	0	0	0	0	0	0
66	39.01	0	0	0	0	0	0
67	124.97	0	0	0	0	0	0
68	72.92	0.12	0	255	8.68	255	1
69	44.56	0.19	0	255	8.68	255	1
70	93.59	0	0	0	0	0	0
71	45.35	0.19	0	255	8.68	255	1
72	100.9	0.09	0	255	8.68	255	1
73	92.94	0.19	0	255	17.36	510	2
74	29.65	0	0	0	0	0	0
75	5.31	0	0	0	0	0	0
							0
							0
							0

## Sheet: BRCA2 NT
	Area	Mean	Min	Max	IntDen	RawIntDen	number of Foci
1	25.84	0.67	0	255	17.36	510	2
2	8.44	0	0	0	0	0	0
3	13.86	0	0	0	0	0	0
4	29.24	0	0	0	0	0	0
5	42.04	0.21	0	255	8.68	255	1
6	17.74	0.49	0	255	8.68	255	1
7	82.28	0.11	0	255	8.68	255	1
8	54.06	0	0	0	0	0	0
9	24.2	0	0	0	0	0	0
10	50.66	0.17	0	255	8.68	255	1
11	22.71	0	0	0	0	0	0
12	30.84	0.28	0	255	8.68	255	1
13	34.55	0	0	0	0	0	0
14	27.03	0	0	0	0	0	0
15	52.9	0	0	0	0	0	0
16	67	0	0	0	0	0	0
17	79.08	0.11	0	255	8.68	255	1
18	52.36	0	0	0	0	0	0
19	76.05	0	0	0	0	0	0
20	8.75	0	0	0	0	0	0
21	22.16	0	0	0	0	0	0
22	8.89	0	0	0	0	0	0
23	57.6	0	0	0	0	0	0
24	47.15	0	0	0	0	0	0
25	57.47	0	0	0	0	0	0
26	62.78	0	0	0	0	0	0
27	63.63	0	0	0	0	0	0
28	20.22	0	0	0	0	0	0
29	29.79	0.29	0	255	8.68	255	1
30	60.97	0	0	0	0	0	0
31	74.15	0	0	0	0	0	0
32	72	0	0	0	0	0	0
33	7.76	0	0	0	0	0	0
34	31.76	0	0	0	0	0	0
35	7.25	0	0	0	0	0	0
36	23.42	0	0	0	0	0	0
37	33.4	0	0	0	0	0	0
38	28.94	0	0	0	0	0	0
39	44.84	0.39	0	255	17.36	510	2
40	103.66	0.17	0	255	17.36	510	2
41	45.28	0	0	0	0	0	0
42	73.19	0.12	0	255	8.68	255	1
43	25.98	0	0	0	0	0	0
44	18.25	0	0	0	0	0	0
45	39.25	0	0	0	0	0	0
46	69.24	0	0	0	0	0	0
47	56.99	0	0	0	0	0	0
48	42.18	0	0	0	0	0	0
49	49.36	0	0	0	0	0	0
50	100.87	0	0	0	0	0	0
51	70.44	0	0	0	0	0	0
52	114.45	0	0	0	0	0	0
53	76.39	0	0	0	0	0	0
54	107.54	0.08	0	255	8.68	255	1
55	102.88	0.17	0	255	17.36	510	2
56	13.92	0	0	0	0	0	0
57	77.52	0	0	0	0	0	0
58	136.04	0	0	0	0	0	0
59	58.32	0	0	0	0	0	0
60	13.69	0	0	0	0	0	0
61	78.13	0.11	0	255	8.68	255	1
62	122.45	0.21	0	255	26.04	765	3
63	72.82	0.12	0	255	8.68	255	1
64	103.9	0	0	0	0	0	0
65	115.37	0.23	0	255	26.04	765	3
66	30.98	0	0	0	0	0	0
67	82.52	0.21	0	255	17.36	510	2
68	49.02	0.35	0	255	17.36	510	2
69	44.7	0	0	0	0	0	0
70	18.21	0	0	0	0	0	0
71	119.12	0	0	0	0	0	0
72	63.73	0	0	0	0	0	0
73	104.28	0.33	0	255	34.72	1020	4
74	82.35	0.21	0	255	17.36	510	2
75	98.49	0	0	0	0	0	0
76	17.29	0	0	0	0	0	0
77	13.21	0	0	0	0	0	0
78	67.54	0.39	0	255	26.04	765	3
79	139.61	0.25	0	255	34.72	1020	4
80	53.82	0	0	0	0	0	0
81	29.48	0	0	0	0	0	0
82	17.84	0	0	0	0	0	0
83	56.78	0	0	0	0	0	0
84	73.81	0	0	0	0	0	0
85	39.32	0.22	0	255	8.68	255	1
86	67.3	0.26	0	255	17.36	510	2
87	23.69	0	0	0	0	0	0
88	73.94	0	0	0	0	0	0
89	133.52	0.2	0	255	26.04	765	3
90	44.12	0	0	0	0	0	0
91	127.02	0.21	0	255	26.04	765	3
92	75.92	0.34	0	255	26.04	765	3
93	75.41	0.12	0	255	8.68	255	1
94	77.45	0	0	0	0	0	0
95	28.26	0	0	0	0	0	0
96	55.8	0	0	0	0	0	0
97	15.12	0	0	0	0	0	0
98	59.61	0.44	0	255	26.04	765	3
99	121.26	0.07	0	255	8.68	255	1
100	28.02	0	0	0	0	0	0
101	105.26	0.25	0	255	26.04	765	3
102	121.54	0.14	0	255	17.36	510	2
103	41.74	0.21	0	255	8.68	255	1
104	58.83	0	0	0	0	0	0
105	89.33	0.1	0	255	8.68	255	1
106	115.37	0.38	0	255	43.41	1275	5
107	51.34	0.34	0	255	17.36	510	2
108	84.39	0.21	0	255	17.36	510	2
109	87.25	0	0	0	0	0	0
110	33.09	0.26	0	255	8.68	255	1
111	66.62	0.13	0	255	8.68	255	1
112	74.04	0.12	0	255	8.68	255	1
113	45.38	0	0	0	0	0	0
114	61.55	0	0	0	0	0	0
115	14.4	0	0	0	0	0	0
116	12.66	0	0	0	0	0	0
117	15.22	0	0	0	0	0	0
118	13.24	0	0	0	0	0	0
1	85.52	0	0	0	0	0	0
2	7.86	0	0	0	0	0	0
3	25.74	0	0	0	0	0	0
4	31.86	0	0	0	0	0	0
5	51.2	0	0	0	0	0	0
6	45.01	0	0	0	0	0	0
7	28.73	0	0	0	0	0	0
8	142.88	0	0	0	0	0	0
9	62.78	0.14	0	255	8.68	255	1
10	98.83	0	0	0	0	0	0
11	97.84	0	0	0	0	0	0
12	106.69	0	0	0	0	0	0
13	109.86	0	0	0	0	0	0
14	44.56	0	0	0	0	0	0
15	48.72	0	0	0	0	0	0
16	135.63	0.13	0	255	17.36	510	2
17	83.1	0	0	0	0	0	0
18	78.44	0	0	0	0	0	0
19	107.48	0.08	0	255	8.68	255	1
20	151.56	0	0	0	0	0	0
21	155.82	0.06	0	255	8.68	255	1
22	180.12	0.05	0	255	8.68	255	1
23	27.03	0	0	0	0	0	0
24	120.62	0.07	0	255	8.68	255	1
25	106.11	0	0	0	0	0	0
26	26.21	0	0	0	0	0	0
27	78.13	0.11	0	255	8.68	255	1
28	100.84	0.26	0	255	26.04	765	3
29	149.48	0.12	0	255	17.36	510	2
30	96.72	0.09	0	255	8.68	255	1
31	136.45	0	0	0	0	0	0
32	51.41	0	0	0	0	0	0
33	211.95	0	0	0	0	0	0
34	124.6	0	0	0	0	0	0
35	92.36	0.09	0	255	8.68	255	1
36	83.58	0.1	0	255	8.68	255	1
37	184.18	0	0	0	0	0	0
38	109.42	0.08	0	255	8.68	255	1
39	227.72	0.19	0	255	43.41	1275	5
40	160.86	0.05	0	255	8.68	255	1
41	188.4	0.05	0	255	8.68	255	1
42	59.1	0	0	0	0	0	0
43	183.73	0	0	0	0	0	0
44	137.71	0	0	0	0	0	0
45	79.22	0	0	0	0	0	0
46	105.88	0.08	0	255	8.68	255	1
47	187.17	0.14	0	255	26.04	765	3
48	62.4	0	0	0	0	0	0
49	144.24	0.18	0	255	26.04	765	3
50	178.49	0.1	0	255	17.36	510	2
51	182.37	0.14	0	255	26.04	765	3
52	69.07	0	0	0	0	0	0
53	220.23	0.2	0	255	43.41	1275	5
54	128.21	0	0	0	0	0	0
55	35.13	0	0	0	0	0	0
56	15.46	0	0	0	0	0	0
1	84.46	0.1	0	255	8.68	255	1
2	17.7	0	0	0	0	0	0
3	29.82	0	0	0	0	0	0
4	49.29	0	0	0	0	0	0
5	42.49	0.2	0	255	8.68	255	1
6	22.4	0	0	0	0	0	0
7	138.49	0.06	0	255	8.68	255	1
8	60.46	0.14	0	255	8.68	255	1
9	98.42	0	0	0	0	0	0
10	96.51	0	0	0	0	0	0
11	103.83	0	0	0	0	0	0
12	107.92	0.16	0	255	17.36	510	2
13	36.7	0	0	0	0	0	0
14	42.72	0	0	0	0	0	0
15	132.67	0.2	0	255	26.04	765	3
16	81.84	0	0	0	0	0	0
17	75.71	0	0	0	0	0	0
18	104.79	0.08	0	255	8.68	255	1
19	151.05	0	0	0	0	0	0
20	153.67	0.11	0	255	17.36	510	2
21	179.68	0.05	0	255	8.68	255	1
22	20.77	0	0	0	0	0	0
23	120.75	0.07	0	255	8.68	255	1
24	106.42	0	0	0	0	0	0
25	77.35	0.11	0	255	8.68	255	1
26	26.15	0	0	0	0	0	0
27	102.81	0.25	0	255	26.04	765	3
28	150.3	0.17	0	255	26.04	765	3
29	97.6	0.09	0	255	8.68	255	1
30	135.29	0.06	0	255	8.68	255	1
31	47.46	0	0	0	0	0	0
32	209.95	0	0	0	0	0	0
33	121.3	0	0	0	0	0	0
34	90.59	0.1	0	255	8.68	255	1
35	82.56	0.21	0	255	17.36	510	2
36	184.41	0.05	0	255	8.68	255	1
37	104.31	0.08	0	255	8.68	255	1
38	223.36	0.19	0	255	43.41	1275	5
39	159.63	0.05	0	255	8.68	255	1
40	185.47	0.05	0	255	8.68	255	1
41	59.34	0.15	0	255	8.68	255	1
42	181.96	0	0	0	0	0	0
43	135.19	0	0	0	0	0	0
44	78.74	0	0	0	0	0	0
45	105.47	0.16	0	255	17.36	510	2
46	188.19	0.37	0	255	69.45	2040	8
47	61.45	0	0	0	0	0	0
48	143.53	0.18	0	255	26.04	765	3
49	177.98	0.15	0	255	26.04	765	3
50	181.76	0.24	0	255	43.41	1275	5
51	68.26	0	0	0	0	0	0
52	219.75	0.28	0	255	60.77	1785	7
53	125.93	0.14	0	255	17.36	510	2
54	34.93	0	0	0	0	0	0
55	14.57	0	0	0	0	0	0
1	126.71	0.21	0	255	26.04	765	3
2	132.84	0.07	0	255	8.68	255	1
3	59	0	0	0	0	0	0
4	87.76	0.3	0	255	26.04	765	3
5	115.27	0.08	0	255	8.68	255	1
6	84.39	0.1	0	255	8.68	255	1
7	248.07	0	0	0	0	0	0
8	68.8	0.13	0	255	8.68	255	1
9	77.21	0	0	0	0	0	0
10	103.53	0.17	0	255	17.36	510	2
11	112.82	0.08	0	255	8.68	255	1
12	88.68	0.2	0	255	17.36	510	2
13	49.53	0.35	0	255	17.36	510	2
14	101.14	0.17	0	255	17.36	510	2
15	105.74	0	0	0	0	0	0
16	110.71	0.16	0	255	17.36	510	2
17	142.34	0.06	0	255	8.68	255	1
18	106.86	0.08	0	255	8.68	255	1
19	90.11	0.19	0	255	17.36	510	2
20	187.31	0.19	0	255	34.72	1020	4
21	121.74	0.07	0	255	8.68	255	1
22	91.47	0	0	0	0	0	0
23	68.63	0.38	0	255	26.04	765	3
24	124.05	0.14	0	255	17.36	510	2
25	72.58	0.24	0	255	17.36	510	2
26	80.68	0.22	0	255	17.36	510	2
27	123.85	0.28	0	255	34.72	1020	4
28	253.32	0.17	0	255	43.41	1275	5
29	18.93	0.92	0	255	17.36	510	2
30	148.67	0.06	0	255	8.68	255	1
31	8.54	0	0	0	0	0	0
32	88.14	0.2	0	255	17.36	510	2
33	140.29	0.19	0	255	26.04	765	3
34	117.48	0.07	0	255	8.68	255	1
35	39.56	0.22	0	255	8.68	255	1
36	161.03	0.05	0	255	8.68	255	1
37	119.22	0.15	0	255	17.36	510	2
38	123.65	0.14	0	255	17.36	510	2
39	144.99	0.36	0	255	52.09	1530	6
40	65.57	0.13	0	255	8.68	255	1
41	117.35	0.15	0	255	17.36	510	2
42	105.67	0	0	0	0	0	0
43	121.94	0.07	0	255	8.68	255	1
44	7.46	0	0	0	0	0	0
45	123.51	0.21	0	255	26.04	765	3
46	116.43	0.07	0	255	8.68	255	1
47	141.01	0.43	0	255	60.77	1785	7
48	146.69	0.3	0	255	43.41	1275	5
49	108.02	0.08	0	255	8.68	255	1
50	130.01	0.47	0	255	60.77	1785	7
51	35.24	0.25	0	255	8.68	255	1
52	26.15	0	0	0	0	0	0
53	87.97	0.1	0	255	8.68	255	1
54	188.26	0.05	0	255	8.68	255	1
55	60.73	0.14	0	255	8.68	255	1
56	202.93	0.09	0	255	17.36	510	2
57	101.42	0.09	0	255	8.68	255	1
58	200.11	0.09	0	255	17.36	510	2
59	116.33	0	0	0	0	0	0
60	103.49	0.17	0	255	17.36	510	2
61	104.62	0.25	0	255	26.04	765	3
62	90.79	0.1	0	255	8.68	255	1
63	135.49	0.32	0	255	43.41	1275	5
64	126.47	0.21	0	255	26.04	765	3
65	128.51	0.07	0	255	8.68	255	1
66	81.67	0.11	0	255	8.68	255	1
67	114.66	0.15	0	255	17.36	510	2
68	119.32	0.07	0	255	8.68	255	1
69	175.22	0.05	0	255	8.68	255	1
70	91.3	0.19	0	255	17.36	510	2
71	86.33	0.1	0	255	8.68	255	1
72	94.13	0.18	0	255	17.36	510	2
73	56.07	0.15	0	255	8.68	255	1
74	33.33	0	0	0	0	0	0
1	138.93	0.25	0	255	34.72	1020	4
2	66.04	0.26	0	255	17.36	510	2
3	87.76	0.2	0	255	17.36	510	2
4	110.33	0.24	0	255	26.04	765	3
5	137.06	0.13	0	255	17.36	510	2
6	71.53	0.85	0	255	60.77	1785	7
7	118.34	0.29	0	255	34.72	1020	4
8	65.64	1.19	0	255	78.13	2295	9
9	87.49	0.3	0	255	26.04	765	3
10	134.37	0.32	0	255	43.41	1275	5
11	91.17	0.57	0	255	52.09	1530	6
12	152.89	0.17	0	255	26.04	765	3
13	119.94	0.07	0	255	8.68	255	1
14	113.13	0.31	0	255	34.72	1020	4
15	114.32	0.3	0	255	34.72	1020	4
16	115.1	0.45	0	255	52.09	1530	6
17	129.37	0.47	0	255	60.77	1785	7
18	142.03	0.43	0	255	60.77	1785	7
19	135.7	0	0	0	0	0	0
20	144.89	0.06	0	255	8.68	255	1
21	112.31	0.15	0	255	17.36	510	2
22	118.13	0.37	0	255	43.41	1275	5
23	147.54	0.18	0	255	26.04	765	3
24	93.31	0.09	0	255	8.68	255	1
25	12.66	0.69	0	255	8.68	255	1
26	105.53	0.25	0	255	26.04	765	3
27	37.48	0.23	0	255	8.68	255	1
28	73.94	0.47	0	255	34.72	1020	4
29	84.77	0.2	0	255	17.36	510	2
30	107.24	0.16	0	255	17.36	510	2
31	77.89	0.33	0	255	26.04	765	3
32	191.6	0.41	0	255	78.13	2295	9
33	192.11	0.09	0	255	17.36	510	2
34	91.68	0.09	0	255	8.68	255	1
35	139.44	0.06	0	255	8.68	255	1
36	89.3	0.1	0	255	8.68	255	1
37	102.03	0.09	0	255	8.68	255	1
38	48.58	0.18	0	255	8.68	255	1
39	138.97	0.06	0	255	8.68	255	1
40	195.68	0.13	0	255	26.04	765	3
41	82.35	0.21	0	255	17.36	510	2
42	132.53	0.2	0	255	26.04	765	3
43	88.31	0.2	0	255	17.36	510	2
44	102.06	0.43	0	255	43.41	1275	5
45	112.48	0.23	0	255	26.04	765	3
46	146.25	0.06	0	255	8.68	255	1
47	11.95	0	0	0	0	0	0
48	79.56	0.55	0	255	43.41	1275	5
49	110.06	0.32	0	255	34.72	1020	4
50	131.31	0.26	0	255	34.72	1020	4
51	93.18	0.28	0	255	26.04	765	3
52	101.35	0.26	0	255	26.04	765	3
53	156.43	0.22	0	255	34.72	1020	4
54	122.08	0.5	0	255	60.77	1785	7
55	120.96	0.22	0	255	26.04	765	3
56	114.56	0.23	0	255	26.04	765	3
57	98.96	0.7	0	255	69.45	2040	8
58	16.1	0.54	0	255	8.68	255	1
59	11.68	0.74	0	255	8.68	255	1
1	14.6	0	0	0	0	0	0
2	83.58	0	0	0	0	0	0
3	43.75	0	0	0	0	0	0
4	9.74	0	0	0	0	0	0
5	24.78	0	0	0	0	0	0
6	70.84	0	0	0	0	0	0
7	94.71	0	0	0	0	0	0
8	60.39	0	0	0	0	0	0
9	120.92	0.14	0	255	17.36	510	2
10	132.16	0	0	0	0	0	0
11	86.98	0.1	0	255	8.68	255	1
12	106.42	0	0	0	0	0	0
13	87.42	0	0	0	0	0	0
14	45.58	0	0	0	0	0	0
15	69.11	0	0	0	0	0	0
16	103.15	0	0	0	0	0	0
17	104.99	0.08	0	255	8.68	255	1
18	71.73	0	0	0	0	0	0
19	74.42	0.12	0	255	8.68	255	1
20	106.49	0	0	0	0	0	0
21	115.41	0	0	0	0	0	0
22	93.59	0.09	0	255	8.68	255	1
23	32.85	0.26	0	255	8.68	255	1
24	59.58	0	0	0	0	0	0
25	59.41	0.15	0	255	8.68	255	1
26	15.12	0	0	0	0	0	0
27	95.93	0	0	0	0	0	0
28	83.41	0	0	0	0	0	0
29	103.25	0	0	0	0	0	0
30	104.65	0.08	0	255	8.68	255	1
31	97.7	0.09	0	255	8.68	255	1
32	240.28	0.07	0	255	17.36	510	2
33	111.7	0.16	0	255	17.36	510	2
34	81.5	0	0	0	0	0	0
35	90.9	0	0	0	0	0	0
36	63.49	0	0	0	0	0	0
37	122.01	0.28	0	255	34.72	1020	4
38	122.08	0.14	0	255	17.36	510	2
39	56.38	0.15	0	255	8.68	255	1
40	141.21	0.06	0	255	8.68	255	1
41	49.26	0	0	0	0	0	0
42	95.8	0	0	0	0	0	0
43	246.92	0.04	0	255	8.68	255	1
44	101.11	0	0	0	0	0	0
45	224.01	0.08	0	255	17.36	510	2
46	117.62	0.15	0	255	17.36	510	2
47	214.75	0.04	0	255	8.68	255	1
48	94.47	0.09	0	255	8.68	255	1
49	178.76	0	0	0	0	0	0
50	174.13	0.1	0	255	17.36	510	2
51	160.04	0.16	0	255	26.04	765	3
52	306.87	0.2	0	255	60.77	1785	7
53	127.83	0.14	0	255	17.36	510	2
54	147.1	0.12	0	255	17.36	510	2
55	22.64	0.38	0	255	8.68	255	1
56	152.24	0.17	0	255	26.04	765	3
57	171.61	0.05	0	255	8.68	255	1
58	65.57	0	0	0	0	0	0
59	9.23	0	0	0	0	0	0

## Sheet: B2 Fasudil exp 2
	Area	Mean	Min	Max	IntDen	RawIntDen	number of Foci
1	58.185	0	0	0	0	0	0
2	115.189	0.187	0	255	21.535	255	1
3	103.957	0.207	0	255	21.535	255	1
4	131.403	0.164	0	255	21.535	255	1
5	57.088	0	0	0	0	0	0
6	87.152	0.247	0	255	21.535	255	1
7	117.553	0	0	0	0	0	0
8	77.271	0.279	0	255	21.535	255	1
9	135.541	0	0	0	0	0	0
10	94.33	0.228	0	255	21.535	255	1
11	124.309	0.173	0	255	21.535	255	1
12	95.681	0.225	0	255	21.535	255	1
13	72.88	0	0	0	0	0	0
14	91.458	0.235	0	255	21.535	255	1
15	131.572	0.491	0	255	64.604	765	3
16	121.86	0.353	0	255	43.069	510	2
17	78.96	0.273	0	255	21.535	255	1
18	108.348	0	0	0	0	0	0
19	87.996	0.245	0	255	21.535	255	1
20	87.574	0	0	0	0	0	0
21	51.345	0	0	0	0	0	0
22	88.672	0.486	0	255	43.069	510	2
23	88.672	0.243	0	255	21.535	255	1
24	78.115	0.276	0	255	21.535	255	1
25	80.396	0.268	0	255	21.535	255	1
26	93.063	0.231	0	255	21.535	255	1
27	66.63	0	0	0	0	0	0
28	55.652	0.387	0	255	21.535	255	1
29	103.197	0.626	0	255	64.604	765	3
30	159.44	0	0	0	0	0	0
31	85.294	0	0	0	0	0	0
32	117.3	0.184	0	255	21.535	255	1
33	96.779	0	0	0	0	0	0
34	82.845	0.26	0	255	21.535	255	1
35	65.87	0.654	0	255	43.069	510	2
36	107.25	0.201	0	255	21.535	255	1
37	88.587	0.486	0	255	43.069	510	2
38	56.665	0.38	0	255	21.535	255	1
39	113.162	0.19	0	255	21.535	255	1
40	67.39	0.32	0	255	21.535	255	1
41	84.871	0	0	0	0	0	0
42	92.979	0	0	0	0	0	0
43	106.913	0.201	0	255	21.535	255	1
44	163.578	0.132	0	255	21.535	255	1
45	119.073	0.181	0	255	21.535	255	1
46	71.191	0.302	0	255	21.535	255	1
47	82.253	0	0	0	0	0	0
48	94.752	0	0	0	0	0	0
49	85.463	0.252	0	255	21.535	255	1
50	119.327	1.083	0	255	129.207	1530	6
51	82.929	0	0	0	0	0	0
52	118.651	0.181	0	255	21.535	255	1
53	138.328	0.156	0	255	21.535	255	1
54	91.036	0.237	0	255	21.535	255	1
55	134.274	0.321	0	255	43.069	510	2
56	96.188	0.224	0	255	21.535	255	1
57	135.71	0.317	0	255	43.069	510	2
58	116.286	0.37	0	255	43.069	510	2
59	109.193	0.394	0	255	43.069	510	2
60	119.833	0.18	0	255	21.535	255	1
61	156.653	0.137	0	255	21.535	255	1
62	111.642	0.772	0	255	86.138	1020	4
63	80.396	0.268	0	255	21.535	255	1
64	123.38	0.349	0	255	43.069	510	2
65	127.94	0.168	0	255	21.535	255	1
66	94.414	0.228	0	255	21.535	255	1
67	142.381	0.151	0	255	21.535	255	1
68	160.031	0.135	0	255	21.535	255	1
69	111.051	0	0	0	0	0	0
70	93.654	0.23	0	255	21.535	255	1
71	171.938	0.125	0	255	21.535	255	1
72	209.603	0	0	0	0	0	0
73	34.286	0	0	0	0	0	0
74	101.93	0.211	0	255	21.535	255	1
75	125.491	0.172	0	255	21.535	255	1
76	91.627	0	0	0	0	0	0
77	43.998	0	0	0	0	0	0
78	263.144	0.246	0	255	64.604	765	3
79	114.006	0.189	0	255	21.535	255	1
80	92.134	0	0	0	0	0	0
81	98.721	0	0	0	0	0	0
82	74.822	0.288	0	255	21.535	255	1
83	133.43	0	0	0	0	0	0
84	97.201	0.222	0	255	21.535	255	1
85	82.591	0.261	0	255	21.535	255	1
86	105.308	0.204	0	255	21.535	255	1
87	106.153	0	0	0	0	0	0
88	74.822	0.576	0	255	43.069	510	2
89	105.224	0.205	0	255	21.535	255	1
90	107.419	0.2	0	255	21.535	255	1
91	127.18	0.169	0	255	21.535	255	1
92	92.05	0	0	0	0	0	0
93	95.09	0.226	0	255	21.535	255	1
94	75.582	0.285	0	255	21.535	255	1
95	81.578	0	0	0	0	0	0
96	83.689	0.257	0	255	21.535	255	1
97	78.115	0.276	0	255	21.535	255	1
98	100.157	0.215	0	255	21.535	255	1
99	65.195	0.33	0	255	21.535	255	1
1	67.137	0	0	0	0	0	0
2	141.959	0.152	0	255	21.535	255	1
3	213.065	0	0	0	0	0	0
4	87.152	0	0	0	0	0	0
5	84.956	0	0	0	0	0	0
6	120.424	0	0	0	0	0	0
7	67.897	0	0	0	0	0	0
8	82.676	0.26	0	255	21.535	255	1
9	97.877	0	0	0	0	0	0
10	70.431	0	0	0	0	0	0
11	89.516	0.481	0	255	43.069	510	2
12	38.34	0	0	0	0	0	0
13	58.439	0.737	0	255	43.069	510	2
14	124.816	0	0	0	0	0	0
15	136.639	0.158	0	255	21.535	255	1
16	88.249	0	0	0	0	0	0
17	67.306	0.32	0	255	21.535	255	1
18	47.376	0	0	0	0	0	0
19	90.529	0.476	0	255	43.069	510	2
20	38.002	0.567	0	255	21.535	255	1
21	35.722	0.603	0	255	21.535	255	1
22	128.701	0.335	0	255	43.069	510	2
23	59.199	0	0	0	0	0	0
24	97.285	0.221	0	255	21.535	255	1
25	87.32	0	0	0	0	0	0
26	76.173	0.565	0	255	43.069	510	2
27	138.074	0.156	0	255	21.535	255	1
28	84.618	0.509	0	255	43.069	510	2
29	168.983	0	0	0	0	0	0
30	112.993	0.381	0	255	43.069	510	2
31	106.828	0.605	0	255	64.604	765	3
32	89.769	0	0	0	0	0	0
33	81.916	0	0	0	0	0	0
34	179.032	0	0	0	0	0	0
35	112.233	0.192	0	255	21.535	255	1
36	102.775	0	0	0	0	0	0
37	143.057	0	0	0	0	0	0
38	83.436	0	0	0	0	0	0
39	84.449	0.255	0	255	21.535	255	1
40	90.783	0.474	0	255	43.069	510	2
41	85.8	0	0	0	0	0	0
42	80.902	0	0	0	0	0	0
43	74.146	0	0	0	0	0	0
44	128.278	0.336	0	255	43.069	510	2
45	52.021	0.414	0	255	21.535	255	1
46	99.481	0	0	0	0	0	0
47	126.843	0.34	0	255	43.069	510	2
48	319.724	0	0	0	0	0	0
49	70.937	0	0	0	0	0	0
50	136.977	0	0	0	0	0	0
51	128.532	0	0	0	0	0	0
52	485.329	0	0	0	0	0	0
53	166.196	0.13	0	255	21.535	255	1
54	63.252	0	0	0	0	0	0
55	93.739	0.23	0	255	21.535	255	1
56	61.817	0	0	0	0	0	0
57	196.935	0	0	0	0	0	0
58	123.211	0.175	0	255	21.535	255	1
59	68.573	0.314	0	255	21.535	255	1
60	31.5	0.684	0	255	21.535	255	1
61	34.624	0	0	0	0	0	0
62	118.313	0.182	0	255	21.535	255	1
63	52.95	0.407	0	255	21.535	255	1
64	56.412	0.382	0	255	21.535	255	1
65	47.123	0	0	0	0	0	0
66	98.806	0.436	0	255	43.069	510	2
67	247.774	0.087	0	255	21.535	255	1
68	114.091	0.377	0	255	43.069	510	2
69	44.336	0	0	0	0	0	0
70	91.965	0	0	0	0	0	0
71	173.796	0.248	0	255	43.069	510	2
72	36.313	0	0	0	0	0	0
73	86.391	0.499	0	255	43.069	510	2
74	138.581	0.155	0	255	21.535	255	1
75	130.558	0	0	0	0	0	0
76	279.949	0	0	0	0	0	0
77	130.474	0	0	0	0	0	0
78	298.274	0	0	0	0	0	0
79	120.678	0	0	0	0	0	0
80	392.182	0.055	0	255	21.535	255	1
81	131.825	0	0	0	0	0	0
82	150.404	0.143	0	255	21.535	255	1
83	92.05	0	0	0	0	0	0
84	91.796	0.235	0	255	21.535	255	1
85	130.896	0	0	0	0	0	0
86	149.391	0.288	0	255	43.069	510	2
87	84.534	0	0	0	0	0	0
88	75.16	0	0	0	0	0	0
89	77.862	0	0	0	0	0	0
90	83.689	0.772	0	255	64.604	765	3
91	71.022	0	0	0	0	0	0
92	210.278	0	0	0	0	0	0
93	123.802	0	0	0	0	0	0
94	92.556	0	0	0	0	0	0
95	101.086	0	0	0	0	0	0
96	103.366	0.417	0	255	43.069	510	2
97	56.243	0	0	0	0	0	0
98	48.727	0	0	0	0	0	0
1	77.778	0.554	0	255	43.069	510	2
2	77.693	0.277	0	255	21.535	255	1
3	46.194	0.466	0	255	21.535	255	1
4	271.673	0.079	0	255	21.535	255	1
5	137.399	0	0	0	0	0	0
6	70.599	0.305	0	255	21.535	255	1
7	212.052	0.102	0	255	21.535	255	1
8	98.806	0	0	0	0	0	0
9	75.329	0	0	0	0	0	0
10	92.218	0.234	0	255	21.535	255	1
11	108.939	0.198	0	255	21.535	255	1
12	99.481	0.216	0	255	21.535	255	1
13	69.502	0.31	0	255	21.535	255	1
14	91.374	0	0	0	0	0	0
15	62.408	0	0	0	0	0	0
16	155.386	0	0	0	0	0	0
17	96.356	0.223	0	255	21.535	255	1
18	107.588	0.2	0	255	21.535	255	1
19	114.26	0.188	0	255	21.535	255	1
20	105.561	0	0	0	0	0	0
21	73.386	0.587	0	255	43.069	510	2
22	115.02	0.374	0	255	43.069	510	2
23	76.173	0	0	0	0	0	0
24	136.808	0.472	0	255	64.604	765	3
25	77.355	0.278	0	255	21.535	255	1
26	82.085	0	0	0	0	0	0
27	119.58	0	0	0	0	0	0
28	190.771	0.226	0	255	43.069	510	2
29	120.424	0.179	0	255	21.535	255	1
30	99.819	0	0	0	0	0	0
31	100.748	0	0	0	0	0	0
32	95.512	0.225	0	255	21.535	255	1
33	58.692	0.367	0	255	21.535	255	1
34	265.255	0.081	0	255	21.535	255	1
35	52.781	0.408	0	255	21.535	255	1
36	57.932	0	0	0	0	0	0
37	147.955	0.146	0	255	21.535	255	1
38	155.133	0.139	0	255	21.535	255	1
39	113.246	0.19	0	255	21.535	255	1
40	142.55	0.604	0	255	86.138	1020	4
41	70.937	0.304	0	255	21.535	255	1
42	117.3	0.918	0	255	107.673	1275	5
43	187.646	0.115	0	255	21.535	255	1
44	168.054	0.128	0	255	21.535	255	1
45	207.238	0	0	0	0	0	0
46	78.115	0.276	0	255	21.535	255	1
47	169.067	0	0	0	0	0	0
48	108.771	0	0	0	0	0	0
49	86.814	0.248	0	255	21.535	255	1
50	68.911	0.312	0	255	21.535	255	1
51	87.912	0.245	0	255	21.535	255	1
52	62.83	0.343	0	255	21.535	255	1
53	82.76	0.26	0	255	21.535	255	1
54	81.325	0.265	0	255	21.535	255	1
55	107.926	0	0	0	0	0	0
56	105.477	0	0	0	0	0	0
57	163.494	0.263	0	255	43.069	510	2
58	112.824	0.191	0	255	21.535	255	1
59	123.296	0.175	0	255	21.535	255	1
60	92.894	0.232	0	255	21.535	255	1
61	113.837	0	0	0	0	0	0
62	113.922	0.189	0	255	21.535	255	1
63	65.786	0.655	0	255	43.069	510	2
64	60.888	0	0	0	0	0	0
65	95.85	0	0	0	0	0	0
66	112.233	0	0	0	0	0	0
67	102.352	0.21	0	255	21.535	255	1
68	62.239	0	0	0	0	0	0
69	67.137	0	0	0	0	0	0
70	137.99	0.156	0	255	21.535	255	1
71	130.052	0	0	0	0	0	0
72	108.348	0	0	0	0	0	0
73	78.622	0	0	0	0	0	0
74	163.325	0.132	0	255	21.535	255	1
75	136.723	0.158	0	255	21.535	255	1
76	92.641	0.232	0	255	21.535	255	1
77	136.132	0	0	0	0	0	0
78	184.015	0.117	0	255	21.535	255	1
79	108.939	0.198	0	255	21.535	255	1
80	137.483	0.157	0	255	21.535	255	1
81	83.858	0	0	0	0	0	0
82	152.684	0.141	0	255	21.535	255	1
83	124.478	0	0	0	0	0	0
84	84.111	0	0	0	0	0	0
85	132.67	0	0	0	0	0	0
86	95.005	0	0	0	0	0	0
87	233.924	0.092	0	255	21.535	255	1
88	71.528	0.301	0	255	21.535	255	1
89	109.362	0.394	0	255	43.069	510	2
90	75.329	0.572	0	255	43.069	510	2
91	122.536	0.176	0	255	21.535	255	1
92	110.375	0.195	0	255	21.535	255	1
93	128.109	0	0	0	0	0	0
94	62.661	0	0	0	0	0	0
1	144.999	0.149	0	255	21.535	255	1
2	70.937	0	0	0	0	0	0
3	111.051	0.776	0	255	86.138	1020	4
4	58.017	0	0	0	0	0	0
5	96.019	0	0	0	0	0	0
6	112.824	0	0	0	0	0	0
7	116.033	0	0	0	0	0	0
8	77.693	0	0	0	0	0	0
9	45.771	0	0	0	0	0	0
10	50.754	0.849	0	255	43.069	510	2
11	79.382	0.543	0	255	43.069	510	2
12	95.174	0	0	0	0	0	0
13	70.684	0.305	0	255	21.535	255	1
14	53.119	1.216	0	255	64.604	765	3
15	92.556	0.233	0	255	21.535	255	1
16	63.168	0	0	0	0	0	0
17	66.715	0	0	0	0	0	0
18	66.715	0	0	0	0	0	0
19	95.934	0	0	0	0	0	0
20	80.48	0.535	0	255	43.069	510	2
21	95.85	0	0	0	0	0	0
22	98.552	0.219	0	255	21.535	255	1
23	101.086	0	0	0	0	0	0
24	85.716	0	0	0	0	0	0
25	77.355	0	0	0	0	0	0
26	125.914	0.171	0	255	21.535	255	1
27	87.405	0	0	0	0	0	0
28	137.737	0.156	0	255	21.535	255	1
29	123.296	0	0	0	0	0	0
30	169.152	0	0	0	0	0	0
31	124.562	0	0	0	0	0	0
32	136.301	0.316	0	255	43.069	510	2
33	103.197	0.209	0	255	21.535	255	1
34	55.652	0	0	0	0	0	0
35	106.068	0.203	0	255	21.535	255	1
36	121.522	0	0	0	0	0	0
37	62.577	0.344	0	255	21.535	255	1
38	115.611	0.373	0	255	43.069	510	2
39	84.28	0	0	0	0	0	0
40	114.682	0	0	0	0	0	0
41	116.202	0.185	0	255	21.535	255	1
42	130.558	0	0	0	0	0	0
43	58.185	0	0	0	0	0	0
44	97.37	0	0	0	0	0	0
45	145.506	0.296	0	255	43.069	510	2
46	65.448	0	0	0	0	0	0
47	79.129	0.544	0	255	43.069	510	2
48	120.931	0	0	0	0	0	0
49	74.146	0	0	0	0	0	0
50	90.952	0	0	0	0	0	0
51	47.629	0.452	0	255	21.535	255	1
52	32.26	0.668	0	255	21.535	255	1
53	79.804	0	0	0	0	0	0
54	170.925	0.126	0	255	21.535	255	1
55	98.552	0.437	0	255	43.069	510	2
56	105.899	0.203	0	255	21.535	255	1
57	113.246	0	0	0	0	0	0
58	93.907	0	0	0	0	0	0
59	128.447	0	0	0	0	0	0
60	145.928	0.148	0	255	21.535	255	1
61	102.859	0.209	0	255	21.535	255	1
62	85.969	0.501	0	255	43.069	510	2
63	83.351	0	0	0	0	0	0
64	127.94	0.168	0	255	21.535	255	1
65	100.241	0.859	0	255	86.138	1020	4
66	236.542	0.364	0	255	86.138	1020	4
67	110.037	0.196	0	255	21.535	255	1
68	107.419	0.2	0	255	21.535	255	1
69	113.922	0.189	0	255	21.535	255	1
70	112.571	0	0	0	0	0	0
71	117.469	0.183	0	255	21.535	255	1
72	151.671	0.142	0	255	21.535	255	1
73	119.664	0.18	0	255	21.535	255	1
74	96.019	0.224	0	255	21.535	255	1
75	98.974	0.435	0	255	43.069	510	2
76	253.685	0.17	0	255	43.069	510	2
77	103.957	0.207	0	255	21.535	255	1
78	110.459	0	0	0	0	0	0
79	95.512	0.225	0	255	21.535	255	1
80	329.605	0	0	0	0	0	0
81	129.714	0	0	0	0	0	0
82	99.481	0.216	0	255	21.535	255	1
83	193.135	0.111	0	255	21.535	255	1
84	120.171	0.358	0	255	43.069	510	2
85	127.012	0	0	0	0	0	0
86	166.196	0.13	0	255	21.535	255	1
87	196.344	0	0	0	0	0	0
88	94.33	0.228	0	255	21.535	255	1
89	151.248	0	0	0	0	0	0
90	83.098	0	0	0	0	0	0
91	78.284	0.275	0	255	21.535	255	1
92	257.401	0.335	0	255	86.138	1020	4
93	68.15	0.316	0	255	21.535	255	1
94	118.904	0	0	0	0	0	0
95	111.557	0.193	0	255	21.535	255	1
96	136.723	0	0	0	0	0	0
97	59.114	0.364	0	255	21.535	255	1
98	169.574	0.127	0	255	21.535	255	1
99	120.087	0	0	0	0	0	0
100	77.187	0	0	0	0	0	0
101	111.304	0	0	0	0	0	0
102	214.754	0.1	0	255	21.535	255	1
103	111.642	0.193	0	255	21.535	255	1
104	110.797	0	0	0	0	0	0
105	92.81	0.464	0	255	43.069	510	2
106	76.258	0	0	0	0	0	0
107	97.201	0.222	0	255	21.535	255	1
108	151.502	0	0	0	0	0	0
109	88.165	0	0	0	0	0	0
110	91.965	0.234	0	255	21.535	255	1
111	121.269	0	0	0	0	0	0
112	114.091	0	0	0	0	0	0
113	110.459	0.39	0	255	43.069	510	2
114	98.637	0.655	0	255	64.604	765	3
115	84.449	0.51	0	255	43.069	510	2
116	105.139	0.205	0	255	21.535	255	1
117	89.685	0	0	0	0	0	0
118	148.63	0	0	0	0	0	0
119	131.572	0	0	0	0	0	0
120	84.28	0	0	0	0	0	0
121	117.3	0.184	0	255	21.535	255	1
122	62.239	0.346	0	255	21.535	255	1
123	108.01	0.199	0	255	21.535	255	1
124	94.921	0	0	0	0	0	0
125	82.845	0.52	0	255	43.069	510	2
126	104.379	0	0	0	0	0	0
127	82.085	0	0	0	0	0	0
128	180.13	0.12	0	255	21.535	255	1
129	170.503	0.253	0	255	43.069	510	2
130	107.25	0	0	0	0	0	0
131	273.109	0.079	0	255	21.535	255	1
132	74.569	0	0	0	0	0	0
133	103.366	0	0	0	0	0	0
134	69.502	0.31	0	255	21.535	255	1
135	81.662	0	0	0	0	0	0
136	73.049	0	0	0	0	0	0
137	37.58	0	0	0	0	0	0
138	41.38	0	0	0	0	0	0

## Sheet: B2 Olaparib exp2 
	Area	Mean	Min	Max	IntDen	RawIntDen	number of Foci
1	117.131	0	0	0	0	0	0
2	33.357	0	0	0	0	0	0
3	62.999	0	0	0	0	0	0
4	52.781	0.408	0	255	21.535	255	1
5	51.767	0	0	0	0	0	0
6	79.636	0	0	0	0	0	0
7	156.231	0	0	0	0	0	0
8	181.059	0	0	0	0	0	0
9	176.076	0	0	0	0	0	0
10	168.476	0.256	0	255	43.069	510	2
11	78.538	0	0	0	0	0	0
12	122.282	0.176	0	255	21.535	255	1
13	39.86	0	0	0	0	0	0
14	137.145	0	0	0	0	0	0
15	77.187	0	0	0	0	0	0
16	71.528	0.301	0	255	21.535	255	1
17	78.791	0.273	0	255	21.535	255	1
18	92.05	0	0	0	0	0	0
19	95.343	0	0	0	0	0	0
20	72.035	0.299	0	255	21.535	255	1
21	73.977	0.582	0	255	43.069	510	2
22	144.07	0.149	0	255	21.535	255	1
23	94.921	0	0	0	0	0	0
24	75.751	0.284	0	255	21.535	255	1
25	50.078	0	0	0	0	0	0
26	68.995	0.312	0	255	21.535	255	1
27	49.234	0.437	0	255	21.535	255	1
28	54.301	0.397	0	255	21.535	255	1
29	89.178	0	0	0	0	0	0
30	159.102	1.624	0	255	258.414	3060	12
31	136.132	0	0	0	0	0	0
32	121.776	0.177	0	255	21.535	255	1
33	58.777	0.366	0	255	21.535	255	1
34	123.634	1.219	0	255	150.742	1785	7
35	87.067	0	0	0	0	0	0
36	132.839	0.648	0	255	86.138	1020	4
37	214.247	0.101	0	255	21.535	255	1
38	98.637	0.873	0	255	86.138	1020	4
39	108.939	0.593	0	255	64.604	765	3
40	192.037	1.458	0	255	279.949	3315	13
41	113.162	1.142	0	255	129.207	1530	6
42	117.891	0.548	0	255	64.604	765	3
43	130.052	0.497	0	255	64.604	765	3
44	112.064	1.345	0	255	150.742	1785	7
45	145.675	0.591	0	255	86.138	1020	4
46	66.546	0.324	0	255	21.535	255	1
47	158.258	1.361	0	255	215.345	2550	10
48	159.947	0.269	0	255	43.069	510	2
49	145.928	0	0	0	0	0	0
50	92.05	0.702	0	255	64.604	765	3
51	113.5	0.569	0	255	64.604	765	3
52	144.999	0.891	0	255	129.207	1530	6
53	74.906	0	0	0	0	0	0
54	44.336	0	0	0	0	0	0
55	97.792	0.22	0	255	21.535	255	1
56	96.272	0.224	0	255	21.535	255	1
57	160.116	0.538	0	255	86.138	1020	4
58	130.558	0.165	0	255	21.535	255	1
59	131.403	0.164	0	255	21.535	255	1
60	132.078	0.489	0	255	64.604	765	3
61	54.639	0	0	0	0	0	0
62	149.897	0.431	0	255	64.604	765	3
63	135.288	0	0	0	0	0	0
64	108.348	0	0	0	0	0	0
65	124.309	0.693	0	255	86.138	1020	4
66	121.353	0.177	0	255	21.535	255	1
67	148.799	0.289	0	255	43.069	510	2
68	116.371	0	0	0	0	0	0
69	92.05	0.468	0	255	43.069	510	2
70	71.528	0.301	0	255	21.535	255	1
71	145.084	0.742	0	255	107.673	1275	5
72	120.002	0.359	0	255	43.069	510	2
73	98.299	0.438	0	255	43.069	510	2
74	88.925	0.484	0	255	43.069	510	2
75	63.844	0.337	0	255	21.535	255	1
76	129.545	0	0	0	0	0	0
77	157.244	0.959	0	255	150.742	1785	7
78	168.898	0.255	0	255	43.069	510	2
79	77.609	0.555	0	255	43.069	510	2
80	101.423	0.212	0	255	21.535	255	1
81	88.587	0	0	0	0	0	0
82	130.643	0.33	0	255	43.069	510	2
83	131.572	0.491	0	255	64.604	765	3
84	110.459	0.195	0	255	21.535	255	1
85	86.898	0.496	0	255	43.069	510	2
86	129.123	0.167	0	255	21.535	255	1
87	78.031	0.828	0	255	64.604	765	3
88	112.824	0.191	0	255	21.535	255	1
89	111.473	0	0	0	0	0	0
90	133.261	0.323	0	255	43.069	510	2
91	88.587	0.486	0	255	43.069	510	2
92	84.111	0	0	0	0	0	0
93	112.233	0.384	0	255	43.069	510	2
94	133.852	0	0	0	0	0	0
95	128.447	0	0	0	0	0	0
96	44.167	0	0	0	0	0	0
97	34.455	0	0	0	0	0	0
98	101.423	0.425	0	255	43.069	510	2
99	106.659	0.202	0	255	21.535	255	1
100	185.619	0.464	0	255	86.138	1020	4
101	142.719	0.453	0	255	64.604	765	3
102	83.942	0.257	0	255	21.535	255	1
103	113.837	0.568	0	255	64.604	765	3
104	97.792	0.22	0	255	21.535	255	1
105	109.108	0.197	0	255	21.535	255	1
106	109.024	0.395	0	255	43.069	510	2
107	123.549	0.697	0	255	86.138	1020	4
108	113.669	0.758	0	255	86.138	1020	4
109	100.241	0.215	0	255	21.535	255	1
110	144.915	0.149	0	255	21.535	255	1
111	117.469	0.367	0	255	43.069	510	2
112	201.833	0.32	0	255	64.604	765	3
113	97.708	0.441	0	255	43.069	510	2
114	251.658	0.086	0	255	21.535	255	1
115	182.579	0.236	0	255	43.069	510	2
116	71.528	0.903	0	255	64.604	765	3
117	94.583	0.228	0	255	21.535	255	1
118	261.877	0.082	0	255	21.535	255	1
119	103.366	0.208	0	255	21.535	255	1
120	84.534	0.255	0	255	21.535	255	1
1	90.867	0.237	0	255	21.535	255	1
2	87.912	0.735	0	255	64.604	765	3
3	109.953	0.588	0	255	64.604	765	3
4	85.463	1.26	0	255	107.673	1275	5
5	169.236	0.127	0	255	21.535	255	1
6	53.794	1.601	0	255	86.138	1020	4
7	158.764	0.271	0	255	43.069	510	2
8	170.503	0.884	0	255	150.742	1785	7
9	130.643	1.154	0	255	150.742	1785	7
10	422.077	0.51	0	255	215.345	2550	10
11	76.426	0.282	0	255	21.535	255	1
12	148.462	0.29	0	255	43.069	510	2
13	75.92	0.567	0	255	43.069	510	2
14	79.804	0.27	0	255	21.535	255	1
15	157.498	1.777	0	255	279.949	3315	13
16	134.105	0.321	0	255	43.069	510	2
17	164.169	1.836	0	255	301.483	3570	14
18	131.572	0.655	0	255	86.138	1020	4
19	146.688	0.587	0	255	86.138	1020	4
20	90.698	0.712	0	255	64.604	765	3
21	74.484	0.289	0	255	21.535	255	1
22	91.205	0.472	0	255	43.069	510	2
23	120.256	0.716	0	255	86.138	1020	4
24	129.292	0.167	0	255	21.535	255	1
25	110.628	0.195	0	255	21.535	255	1
26	80.987	1.064	0	255	86.138	1020	4
27	126.167	0.341	0	255	43.069	510	2
28	95.681	0.225	0	255	21.535	255	1
29	104.041	1.035	0	255	107.673	1275	5
30	178.525	0.844	0	255	150.742	1785	7
31	130.727	0.659	0	255	86.138	1020	4
32	130.727	0.329	0	255	43.069	510	2
33	113.246	0	0	0	0	0	0
34	156.822	0.412	0	255	64.604	765	3
35	76.764	0.281	0	255	21.535	255	1
36	110.882	0.777	0	255	86.138	1020	4
37	91.881	0.234	0	255	21.535	255	1
38	132.332	0.325	0	255	43.069	510	2
39	73.133	0	0	0	0	0	0
40	125.323	0.515	0	255	64.604	765	3
41	139.257	0.619	0	255	86.138	1020	4
42	121.353	0.532	0	255	64.604	765	3
43	81.831	0	0	0	0	0	0
44	87.32	0.247	0	255	21.535	255	1
45	135.372	0.636	0	255	86.138	1020	4
46	93.316	0.923	0	255	86.138	1020	4
47	91.627	0.235	0	255	21.535	255	1
48	183.93	0.82	0	255	150.742	1785	7
49	80.649	0	0	0	0	0	0
50	152.346	0.848	0	255	129.207	1530	6
51	135.963	0.475	0	255	64.604	765	3
52	164.338	1.179	0	255	193.811	2295	9
53	104.717	0	0	0	0	0	0
54	169.743	0.381	0	255	64.604	765	3
55	51.514	0.418	0	255	21.535	255	1
56	156.062	0.276	0	255	43.069	510	2
57	85.378	0	0	0	0	0	0
58	66.461	0.324	0	255	21.535	255	1
59	76.595	0.562	0	255	43.069	510	2
60	157.92	0.273	0	255	43.069	510	2
61	143.479	0.6	0	255	86.138	1020	4
62	204.198	0.633	0	255	129.207	1530	6
63	54.723	0.394	0	255	21.535	255	1
64	104.548	0.618	0	255	64.604	765	3
65	66.208	0	0	0	0	0	0
66	172.445	0.5	0	255	86.138	1020	4
67	131.572	1.473	0	255	193.811	2295	9
68	204.114	0.211	0	255	43.069	510	2
69	104.717	0	0	0	0	0	0
70	91.29	0.472	0	255	43.069	510	2
71	185.535	0.58	0	255	107.673	1275	5
72	79.213	1.087	0	255	86.138	1020	4
73	179.37	0.12	0	255	21.535	255	1
74	91.543	0	0	0	0	0	0
75	103.957	0.207	0	255	21.535	255	1
76	182.832	0.471	0	255	86.138	1020	4
77	89.685	0.24	0	255	21.535	255	1
78	130.136	0.165	0	255	21.535	255	1
79	208.505	0.31	0	255	64.604	765	3
80	176.414	0.488	0	255	86.138	1020	4
81	82.845	0	0	0	0	0	0
82	187.139	0.575	0	255	107.673	1275	5
83	75.16	0.287	0	255	21.535	255	1
84	477.307	0.135	0	255	64.604	765	3
85	119.749	0.18	0	255	21.535	255	1
86	251.658	0	0	0	0	0	0
87	72.373	0.595	0	255	43.069	510	2
88	66.124	0.977	0	255	64.604	765	3
89	116.033	0.186	0	255	21.535	255	1
90	66.461	0.324	0	255	21.535	255	1
91	96.694	0	0	0	0	0	0
92	92.641	0.465	0	255	43.069	510	2
1	40.367	0.533	0	255	21.535	255	1
2	74.569	0.866	0	255	64.604	765	3
3	114.766	0.751	0	255	86.138	1020	4
4	127.096	0.339	0	255	43.069	510	2
5	68.742	1.253	0	255	86.138	1020	4
6	111.473	0.193	0	255	21.535	255	1
7	72.964	0.295	0	255	21.535	255	1
8	44.758	1.925	0	255	86.138	1020	4
9	52.612	0.819	0	255	43.069	510	2
10	95.09	0.226	0	255	21.535	255	1
11	92.218	0.234	0	255	21.535	255	1
12	41.296	0.521	0	255	21.535	255	1
13	172.614	0.499	0	255	86.138	1020	4
14	97.877	0.44	0	255	43.069	510	2
15	105.561	0.612	0	255	64.604	765	3
16	138.074	0.78	0	255	107.673	1275	5
17	89.263	0.241	0	255	21.535	255	1
18	83.267	0.776	0	255	64.604	765	3
19	108.939	0.593	0	255	64.604	765	3
20	104.379	0.206	0	255	21.535	255	1
21	131.15	0.657	0	255	86.138	1020	4
22	88.165	0.733	0	255	64.604	765	3
23	54.132	0.398	0	255	21.535	255	1
24	61.648	0.349	0	255	21.535	255	1
25	90.445	1.429	0	255	129.207	1530	6
26	78.622	0.822	0	255	64.604	765	3
27	79.298	1.358	0	255	107.673	1275	5
28	114.429	0.565	0	255	64.604	765	3
29	66.968	0.643	0	255	43.069	510	2
30	147.617	1.313	0	255	193.811	2295	9
31	176.837	1.583	0	255	279.949	3315	13
32	159.102	1.218	0	255	193.811	2295	9
33	163.662	2.632	0	255	430.691	5100	20
34	160.96	1.07	0	255	172.276	2040	8
35	111.473	0.966	0	255	107.673	1275	5
36	90.783	0.237	0	255	21.535	255	1
37	135.119	0.637	0	255	86.138	1020	4
38	156.146	1.379	0	255	215.345	2550	10
39	138.665	2.485	0	255	344.553	4080	16
40	150.488	1.002	0	255	150.742	1785	7
41	133.599	0.161	0	255	21.535	255	1
42	105.984	0.203	0	255	21.535	255	1
43	117.3	1.102	0	255	129.207	1530	6
44	91.881	1.641	0	255	150.742	1785	7
45	115.104	1.123	0	255	129.207	1530	6
46	109.699	0.589	0	255	64.604	765	3
47	174.219	1.854	0	255	323.018	3825	15
48	127.687	1.012	0	255	129.207	1530	6
49	136.977	1.572	0	255	215.345	2550	10
50	127.18	0.677	0	255	86.138	1020	4
51	97.877	0.88	0	255	86.138	1020	4
52	90.529	0.238	0	255	21.535	255	1
53	89.685	0.24	0	255	21.535	255	1
54	112.74	0.191	0	255	21.535	255	1
55	140.777	0.918	0	255	129.207	1530	6
56	117.722	0.183	0	255	21.535	255	1
57	117.047	0.552	0	255	64.604	765	3
58	77.44	0.278	0	255	21.535	255	1
59	67.053	0	0	0	0	0	0
60	53.879	0	0	0	0	0	0
61	141.621	1.977	0	255	279.949	3315	13
62	101.846	0.634	0	255	64.604	765	3
63	73.893	0.291	0	255	21.535	255	1
64	72.204	0.596	0	255	43.069	510	2
65	149.306	1.154	0	255	172.276	2040	8
66	105.139	0.205	0	255	21.535	255	1
67	80.564	0.535	0	255	43.069	510	2
68	90.614	0.238	0	255	21.535	255	1
69	129.461	0.832	0	255	107.673	1275	5
70	44.589	0.483	0	255	21.535	255	1
71	113.077	0.381	0	255	43.069	510	2
72	100.326	0.215	0	255	21.535	255	1
73	48.052	0	0	0	0	0	0
74	47.46	0	0	0	0	0	0
75	132.416	0.325	0	255	43.069	510	2
76	54.47	0	0	0	0	0	0
77	54.301	0.397	0	255	21.535	255	1
							0
							0
							0

## Sheet: B2 NT exp2
	Area	Mean	Min	Max	IntDen	RawIntDen	number of Foci
1	47.46	0	0	0	0	0	0
2	114.513	0	0	0	0	0	0
3	99.397	0	0	0	0	0	0
4	103.619	0	0	0	0	0	0
5	79.72	0	0	0	0	0	0
6	38.762	0.556	0	255	21.535	255	1
7	120.002	0	0	0	0	0	0
8	137.821	0.156	0	255	21.535	255	1
9	105.984	0	0	0	0	0	0
10	130.812	0	0	0	0	0	0
11	77.44	0	0	0	0	0	0
12	97.285	0	0	0	0	0	0
13	98.214	0	0	0	0	0	0
14	97.877	0.44	0	255	43.069	510	2
15	81.071	1.594	0	255	129.207	1530	6
16	44.758	0	0	0	0	0	0
17	51.261	0.42	0	255	21.535	255	1
18	115.526	0	0	0	0	0	0
19	84.787	0.254	0	255	21.535	255	1
20	104.295	0	0	0	0	0	0
21	85.631	0	0	0	0	0	0
22	62.915	0.685	0	255	43.069	510	2
23	145.253	0.148	0	255	21.535	255	1
24	88.756	0.971	0	255	86.138	1020	4
25	76.173	0	0	0	0	0	0
26	115.02	0	0	0	0	0	0
27	105.561	0	0	0	0	0	0
28	119.327	0	0	0	0	0	0
29	109.784	0.196	0	255	21.535	255	1
30	104.379	0	0	0	0	0	0
31	97.539	0.221	0	255	21.535	255	1
32	132.501	0.488	0	255	64.604	765	3
33	71.022	0.606	0	255	43.069	510	2
34	77.862	0.277	0	255	21.535	255	1
35	106.406	0.202	0	255	21.535	255	1
36	83.182	0.518	0	255	43.069	510	2
37	119.749	0.18	0	255	21.535	255	1
38	102.775	0	0	0	0	0	0
39	152.431	0.141	0	255	21.535	255	1
40	100.41	0.214	0	255	21.535	255	1
41	87.489	0.246	0	255	21.535	255	1
42	88.503	0.243	0	255	21.535	255	1
43	147.955	0.146	0	255	21.535	255	1
44	160.876	0.134	0	255	21.535	255	1
45	66.715	0	0	0	0	0	0
46	119.073	0.181	0	255	21.535	255	1
47	119.918	0.539	0	255	64.604	765	3
48	130.389	0.165	0	255	21.535	255	1
49	142.297	0.303	0	255	43.069	510	2
50	139.763	0.154	0	255	21.535	255	1
51	87.996	0.245	0	255	21.535	255	1
52	95.343	0.452	0	255	43.069	510	2
53	96.188	0.224	0	255	21.535	255	1
54	96.272	0.447	0	255	43.069	510	2
55	82.085	0.525	0	255	43.069	510	2
56	124.14	0.694	0	255	86.138	1020	4
57	99.481	0	0	0	0	0	0
58	104.632	0.412	0	255	43.069	510	2
59	74.315	0.29	0	255	21.535	255	1
60	100.41	0.214	0	255	21.535	255	1
61	106.828	0.202	0	255	21.535	255	1
62	247.858	0.087	0	255	21.535	255	1
63	125.914	0.171	0	255	21.535	255	1
64	89.938	0.239	0	255	21.535	255	1
65	131.741	0	0	0	0	0	0
66	101.677	0	0	0	0	0	0
67	80.733	0	0	0	0	0	0
68	138.919	0.465	0	255	64.604	765	3
69	113.331	0.19	0	255	21.535	255	1
70	145.59	0	0	0	0	0	0
71	266.268	0.081	0	255	21.535	255	1
72	110.037	0	0	0	0	0	0
73	81.325	0.265	0	255	21.535	255	1
74	73.386	0	0	0	0	0	0
75	238.062	0.362	0	255	86.138	1020	4
76	147.026	0.146	0	255	21.535	255	1
77	79.213	0	0	0	0	0	0
78	120.847	0.178	0	255	21.535	255	1
79	134.781	0.16	0	255	21.535	255	1
80	112.148	0.192	0	255	21.535	255	1
81	81.916	0.263	0	255	21.535	255	1
82	114.344	0.188	0	255	21.535	255	1
83	62.07	0	0	0	0	0	0
84	186.379	0.231	0	255	43.069	510	2
85	125.407	0.172	0	255	21.535	255	1
86	143.479	0.15	0	255	21.535	255	1
87	138.159	0.156	0	255	21.535	255	1
88	89.094	0	0	0	0	0	0
89	86.391	0.249	0	255	21.535	255	1
90	93.57	0.23	0	255	21.535	255	1
91	55.483	0	0	0	0	0	0
92	198.455	0.217	0	255	43.069	510	2
93	137.568	0.157	0	255	21.535	255	1
94	84.618	0.254	0	255	21.535	255	1
95	112.233	0.192	0	255	21.535	255	1
96	86.645	0.249	0	255	21.535	255	1
97	96.356	0.223	0	255	21.535	255	1
98	96.188	0.448	0	255	43.069	510	2
99	60.128	0.716	0	255	43.069	510	2
100	123.549	0.174	0	255	21.535	255	1
101	106.153	0.203	0	255	21.535	255	1
102	150.404	0.143	0	255	21.535	255	1
103	98.468	0.219	0	255	21.535	255	1
104	133.261	0.323	0	255	43.069	510	2
105	113.669	0.189	0	255	21.535	255	1
106	127.349	0.169	0	255	21.535	255	1
107	122.282	0.352	0	255	43.069	510	2
108	71.866	0	0	0	0	0	0
109	46.785	0	0	0	0	0	0
110	101.761	0.212	0	255	21.535	255	1
111	106.068	0	0	0	0	0	0
112	89.263	0	0	0	0	0	0
113	140.101	0.307	0	255	43.069	510	2
114	106.321	0.405	0	255	43.069	510	2
115	116.878	0.368	0	255	43.069	510	2
116	99.397	0.217	0	255	21.535	255	1
117	79.551	0	0	0	0	0	0
118	105.224	0.409	0	255	43.069	510	2
119	75.582	0	0	0	0	0	0
120	81.916	0.263	0	255	21.535	255	1
121	98.974	0	0	0	0	0	0
122	142.804	0.452	0	255	64.604	765	3
123	80.733	0	0	0	0	0	0
124	87.658	0.246	0	255	21.535	255	1
125	91.036	0.473	0	255	43.069	510	2
126	99.903	0.431	0	255	43.069	510	2
127	93.654	0.46	0	255	43.069	510	2
128	101.93	0.423	0	255	43.069	510	2
129	145.506	0.148	0	255	21.535	255	1
130	66.208	0	0	0	0	0	0
131	98.806	0.218	0	255	21.535	255	1
132	64.35	0	0	0	0	0	0
133	63.084	0.341	0	255	21.535	255	1
134	105.308	0	0	0	0	0	0
135	99.312	0.434	0	255	43.069	510	2
136	82.591	0.521	0	255	43.069	510	2
137	31.668	0.68	0	255	21.535	255	1
138	73.555	0.293	0	255	21.535	255	1
139	41.633	0	0	0	0	0	0
140	148.799	0.145	0	255	21.535	255	1
141	50.585	0	0	0	0	0	0
142	99.059	0.217	0	255	21.535	255	1
143	146.519	0.147	0	255	21.535	255	1
144	124.816	0.173	0	255	21.535	255	1
145	119.411	0	0	0	0	0	0
146	41.296	0	0	0	0	0	0
147	85.8	0.251	0	255	21.535	255	1
148	35.975	0	0	0	0	0	0
149	40.704	0	0	0	0	0	0
1	87.912	0	0	0	0	0	0
2	98.383	0	0	0	0	0	0
3	78.707	0	0	0	0	0	0
4	125.154	0.344	0	255	43.069	510	2
5	110.628	0	0	0	0	0	0
6	74.822	0.576	0	255	43.069	510	2
7	99.143	0.217	0	255	21.535	255	1
8	60.719	0	0	0	0	0	0
9	64.941	0.332	0	255	21.535	255	1
10	103.281	0.209	0	255	21.535	255	1
11	135.625	0.159	0	255	21.535	255	1
12	126.336	0.17	0	255	21.535	255	1
13	53.625	0	0	0	0	0	0
14	78.453	0	0	0	0	0	0
15	100.241	0.215	0	255	21.535	255	1
16	80.564	0	0	0	0	0	0
17	133.852	0.322	0	255	43.069	510	2
18	144.83	0.149	0	255	21.535	255	1
19	141.452	0.152	0	255	21.535	255	1
20	117.722	0	0	0	0	0	0
21	157.075	0.137	0	255	21.535	255	1
22	71.951	0	0	0	0	0	0
23	83.605	0	0	0	0	0	0
24	122.705	0	0	0	0	0	0
25	122.451	0.176	0	255	21.535	255	1
26	107.504	0.401	0	255	43.069	510	2
27	141.537	0.152	0	255	21.535	255	1
28	77.947	0.553	0	255	43.069	510	2
29	78.369	0	0	0	0	0	0
30	111.388	0.387	0	255	43.069	510	2
31	148.884	0.289	0	255	43.069	510	2
32	70.431	0.306	0	255	21.535	255	1
33	102.69	0.21	0	255	21.535	255	1
34	79.298	0.272	0	255	21.535	255	1
35	102.437	0	0	0	0	0	0
36	92.218	0.234	0	255	21.535	255	1
37	98.552	0.656	0	255	64.604	765	3
38	130.136	0.331	0	255	43.069	510	2
39	53.794	0	0	0	0	0	0
40	98.974	0	0	0	0	0	0
41	82.929	0.519	0	255	43.069	510	2
42	107.673	0.4	0	255	43.069	510	2
43	103.028	0.209	0	255	21.535	255	1
44	51.598	0	0	0	0	0	0
45	109.784	0.196	0	255	21.535	255	1
46	66.715	0	0	0	0	0	0
47	94.161	0	0	0	0	0	0
48	120.509	0	0	0	0	0	0
49	112.233	0.192	0	255	21.535	255	1
50	89.009	0.484	0	255	43.069	510	2
51	90.783	0.474	0	255	43.069	510	2
52	107.419	0	0	0	0	0	0
53	87.236	0.494	0	255	43.069	510	2
54	66.715	0.323	0	255	21.535	255	1
55	84.111	0.256	0	255	21.535	255	1
56	82.591	0	0	0	0	0	0
57	147.279	0.585	0	255	86.138	1020	4
58	115.949	0.186	0	255	21.535	255	1
59	37.918	0	0	0	0	0	0
60	95.681	0.225	0	255	21.535	255	1
61	148.63	0.145	0	255	21.535	255	1
62	50.332	0	0	0	0	0	0
63	63.252	0	0	0	0	0	0
64	146.604	0.294	0	255	43.069	510	2
65	32.935	0	0	0	0	0	0
66	118.398	0.182	0	255	21.535	255	1
67	75.835	0.284	0	255	21.535	255	1
68	59.537	0	0	0	0	0	0
69	114.682	0.188	0	255	21.535	255	1
70	109.277	0.197	0	255	21.535	255	1
71	147.026	0.586	0	255	86.138	1020	4
72	128.447	0.335	0	255	43.069	510	2
73	104.886	0	0	0	0	0	0
74	84.027	0	0	0	0	0	0
75	113.246	0.19	0	255	21.535	255	1
76	92.472	0.233	0	255	21.535	255	1
77	104.886	0.205	0	255	21.535	255	1
78	107.419	0	0	0	0	0	0
79	78.284	0	0	0	0	0	0
80	84.787	0.254	0	255	21.535	255	1
81	104.126	0.414	0	255	43.069	510	2
82	120.762	0	0	0	0	0	0
83	77.44	0	0	0	0	0	0
84	106.913	0.201	0	255	21.535	255	1
85	158.595	0.543	0	255	86.138	1020	4
86	104.548	0.206	0	255	21.535	255	1
87	89.769	0.24	0	255	21.535	255	1
88	74.062	0.582	0	255	43.069	510	2
89	100.494	0.214	0	255	21.535	255	1
90	114.597	0.188	0	255	21.535	255	1
91	130.136	0	0	0	0	0	0
92	173.29	0.249	0	255	43.069	510	2
93	114.513	0	0	0	0	0	0
94	165.183	0.13	0	255	21.535	255	1
95	146.435	0.147	0	255	21.535	255	1
96	110.713	0.195	0	255	21.535	255	1
97	96.779	0.445	0	255	43.069	510	2
98	90.783	0.237	0	255	21.535	255	1
99	130.558	0	0	0	0	0	0
100	122.029	0	0	0	0	0	0
101	102.183	0	0	0	0	0	0
102	54.807	0.393	0	255	21.535	255	1
103	103.788	0.207	0	255	21.535	255	1
104	80.227	0	0	0	0	0	0
105	68.826	0.313	0	255	21.535	255	1
106	104.97	0	0	0	0	0	0
107	91.458	0.235	0	255	21.535	255	1
108	76.004	0.567	0	255	43.069	510	2
109	95.174	0.226	0	255	21.535	255	1
110	85.294	0.252	0	255	21.535	255	1
111	110.882	0.194	0	255	21.535	255	1
112	73.302	0.294	0	255	21.535	255	1
113	136.47	0.158	0	255	21.535	255	1
114	96.103	0.448	0	255	43.069	510	2
115	80.311	0.804	0	255	64.604	765	3
116	246.929	0	0	0	0	0	0
117	155.218	0.139	0	255	21.535	255	1
118	74.569	0.578	0	255	43.069	510	2
119	101.592	0	0	0	0	0	0
120	58.946	0.365	0	255	21.535	255	1
121	153.275	0.14	0	255	21.535	255	1
122	83.605	0.515	0	255	43.069	510	2
123	103.957	0.207	0	255	21.535	255	1
124	49.994	0	0	0	0	0	0
125	135.119	0	0	0	0	0	0
126	105.224	0	0	0	0	0	0
127	38.847	0	0	0	0	0	0
128	115.949	0.371	0	255	43.069	510	2
129	135.372	0.477	0	255	64.604	765	3
130	120.424	0.358	0	255	43.069	510	2
131	173.627	0.124	0	255	21.535	255	1
132	204.282	0.211	0	255	43.069	510	2
133	55.061	0	0	0	0	0	0
134	71.951	0	0	0	0	0	0
135	148.715	0.145	0	255	21.535	255	1
136	115.611	0	0	0	0	0	0
137	149.137	0.289	0	255	43.069	510	2
138	199.638	0.108	0	255	21.535	255	1
139	81.747	0.263	0	255	21.535	255	1
140	67.559	0	0	0	0	0	0
141	100.241	0.43	0	255	43.069	510	2
142	56.496	0	0	0	0	0	0
143	45.349	0.95	0	255	43.069	510	2

## Sheet: SCR NT exp2
	Area	Mean	Min	Max	IntDen	RawIntDen	number of Foci
1	85.631	0.503	0	255	43.069	510	2
2	66.039	0.326	0	255	21.535	255	1
3	70.093	0.307	0	255	21.535	255	1
4	87.574	0.492	0	255	43.069	510	2
5	89.347	1.687	0	255	150.742	1785	7
6	82.338	0.262	0	255	21.535	255	1
7	64.435	0.334	0	255	21.535	255	1
8	49.741	0.866	0	255	43.069	510	2
9	100.072	0.861	0	255	86.138	1020	4
10	53.456	0.403	0	255	21.535	255	1
11	62.408	0.345	0	255	21.535	255	1
12	111.304	1.161	0	255	129.207	1530	6
13	65.279	0.66	0	255	43.069	510	2
14	63.168	0.341	0	255	21.535	255	1
15	65.279	0.33	0	255	21.535	255	1
16	77.018	0.839	0	255	64.604	765	3
17	194.571	0.664	0	255	129.207	1530	6
18	86.814	0.248	0	255	21.535	255	1
19	84.702	0.254	0	255	21.535	255	1
20	254.614	0.677	0	255	172.276	2040	8
21	169.236	0.636	0	255	107.673	1275	5
22	112.655	0.956	0	255	107.673	1275	5
23	114.597	1.127	0	255	129.207	1530	6
24	293.207	1.322	0	255	387.622	4590	18
25	131.487	0.328	0	255	43.069	510	2
26	148.124	0.436	0	255	64.604	765	3
27	137.145	0.628	0	255	86.138	1020	4
28	51.852	0.415	0	255	21.535	255	1
29	93.907	0.688	0	255	64.604	765	3
30	156.907	0.412	0	255	64.604	765	3
31	240.342	0.896	0	255	215.345	2550	10
32	138.412	0.311	0	255	43.069	510	2
33	135.879	0.792	0	255	107.673	1275	5
34	157.667	0.137	0	255	21.535	255	1
35	101.761	0.635	0	255	64.604	765	3
36	171.094	0.252	0	255	43.069	510	2
37	115.273	0.56	0	255	64.604	765	3
38	110.797	1.166	0	255	129.207	1530	6
39	92.894	0.927	0	255	86.138	1020	4
40	69.164	0.623	0	255	43.069	510	2
41	159.609	0.27	0	255	43.069	510	2
42	160.96	0.937	0	255	150.742	1785	7
43	103.45	1.041	0	255	107.673	1275	5
44	142.55	1.36	0	255	193.811	2295	9
45	74.737	0.288	0	255	21.535	255	1
46	86.645	0.746	0	255	64.604	765	3
47	57.763	0.373	0	255	21.535	255	1
48	124.562	0.519	0	255	64.604	765	3
49	115.611	0.559	0	255	64.604	765	3
50	105.561	0.408	0	255	43.069	510	2
51	78.2	0.275	0	255	21.535	255	1
52	150.911	0.428	0	255	64.604	765	3
53	163.24	0.132	0	255	21.535	255	1
54	138.159	0.779	0	255	107.673	1275	5
55	145.337	0.296	0	255	43.069	510	2
56	106.828	0.202	0	255	21.535	255	1
57	138.328	0.778	0	255	107.673	1275	5
58	82.085	0.262	0	255	21.535	255	1
59	132.923	0.972	0	255	129.207	1530	6
60	148.715	0.579	0	255	86.138	1020	4
61	35.722	0	0	0	0	0	0
62	123.296	0.699	0	255	86.138	1020	4
63	99.397	0.433	0	255	43.069	510	2
64	82	0.263	0	255	21.535	255	1
65	120.593	0.893	0	255	107.673	1275	5
66	143.395	0.751	0	255	107.673	1275	5
67	124.985	1.378	0	255	172.276	2040	8
68	157.244	0.959	0	255	150.742	1785	7
69	133.767	0.483	0	255	64.604	765	3
70	97.708	0.441	0	255	43.069	510	2
71	105.055	0.82	0	255	86.138	1020	4
72	146.097	0.884	0	255	129.207	1530	6
73	103.619	0.416	0	255	43.069	510	2
74	96.188	0.224	0	255	21.535	255	1
75	102.183	0.211	0	255	21.535	255	1
76	156.822	0.275	0	255	43.069	510	2
77	93.316	0.231	0	255	21.535	255	1
78	134.696	0.32	0	255	43.069	510	2
79	47.714	0.451	0	255	21.535	255	1
80	97.539	0.221	0	255	21.535	255	1
1	62.408	0	0	0	0	0	0
2	90.361	0.238	0	255	21.535	255	1
3	31.753	0.678	0	255	21.535	255	1
4	66.039	0.326	0	255	21.535	255	1
5	73.809	0	0	0	0	0	0
6	95.259	0.226	0	255	21.535	255	1
7	61.648	0.699	0	255	43.069	510	2
8	48.389	0	0	0	0	0	0
9	137.652	0	0	0	0	0	0
10	72.964	0.295	0	255	21.535	255	1
11	54.554	0.395	0	255	21.535	255	1
12	95.428	0	0	0	0	0	0
13	55.061	0.391	0	255	21.535	255	1
14	92.303	0.467	0	255	43.069	510	2
15	46.531	1.388	0	255	64.604	765	3
16	64.012	0	0	0	0	0	0
17	56.496	0.381	0	255	21.535	255	1
18	42.309	0.509	0	255	21.535	255	1
19	67.559	0.319	0	255	21.535	255	1
20	65.87	0	0	0	0	0	0
21	108.939	0.198	0	255	21.535	255	1
22	71.444	0	0	0	0	0	0
23	90.023	0.239	0	255	21.535	255	1
24	99.228	0.217	0	255	21.535	255	1
25	104.379	0	0	0	0	0	0
26	72.373	0.298	0	255	21.535	255	1
27	109.024	0.198	0	255	21.535	255	1
28	51.936	0.415	0	255	21.535	255	1
29	82.591	0.521	0	255	43.069	510	2
30	69.586	0.309	0	255	21.535	255	1
31	76.004	0	0	0	0	0	0
32	78.453	0	0	0	0	0	0
33	70.008	0	0	0	0	0	0
34	88.503	0	0	0	0	0	0
35	111.473	0.193	0	255	21.535	255	1
36	109.024	0.395	0	255	43.069	510	2
37	59.452	1.087	0	255	64.604	765	3
38	116.624	0.554	0	255	64.604	765	3
39	82.085	0.262	0	255	21.535	255	1
40	79.636	0	0	0	0	0	0
41	67.813	0	0	0	0	0	0
42	83.351	0	0	0	0	0	0
43	95.005	0.227	0	255	21.535	255	1
44	60.803	0	0	0	0	0	0
45	58.861	0.366	0	255	21.535	255	1
46	58.185	1.11	0	255	64.604	765	3
47	33.695	0	0	0	0	0	0
48	96.779	0	0	0	0	0	0
49	98.552	0.656	0	255	64.604	765	3
50	43.322	0	0	0	0	0	0
51	60.043	0	0	0	0	0	0
52	95.005	0	0	0	0	0	0
53	58.523	0.368	0	255	21.535	255	1
54	72.795	0.296	0	255	21.535	255	1
55	47.038	0.458	0	255	21.535	255	1
56	96.356	0	0	0	0	0	0
57	117.047	0.552	0	255	64.604	765	3
58	54.216	0.397	0	255	21.535	255	1
59	91.458	0.706	0	255	64.604	765	3
60	79.636	0.27	0	255	21.535	255	1
61	70.937	0	0	0	0	0	0
62	52.443	0.411	0	255	21.535	255	1
63	100.579	0	0	0	0	0	0
64	53.879	0.4	0	255	21.535	255	1
65	34.54	0	0	0	0	0	0
66	72.795	0.296	0	255	21.535	255	1
67	45.94	0	0	0	0	0	0
68	104.632	0.206	0	255	21.535	255	1
69	96.525	0.223	0	255	21.535	255	1
70	93.907	0.459	0	255	43.069	510	2
71	109.953	0.392	0	255	43.069	510	2
72	84.787	0	0	0	0	0	0
73	50.838	0.424	0	255	21.535	255	1
74	54.639	0	0	0	0	0	0
75	35.975	0.599	0	255	21.535	255	1
76	57.341	0	0	0	0	0	0
77	53.625	0	0	0	0	0	0
78	67.222	0.32	0	255	21.535	255	1
79	57.088	0.377	0	255	21.535	255	1
80	56.412	0	0	0	0	0	0
81	119.833	0.18	0	255	21.535	255	1
82	45.518	0.473	0	255	21.535	255	1
83	87.152	0.247	0	255	21.535	255	1
84	62.492	0	0	0	0	0	0
85	118.736	0.544	0	255	64.604	765	3
86	31.584	0	0	0	0	0	0
87	65.279	0	0	0	0	0	0
88	63.421	0	0	0	0	0	0
89	38.509	0	0	0	0	0	0
90	47.038	0.458	0	255	21.535	255	1
91	101.339	0.212	0	255	21.535	255	1
92	102.944	0.418	0	255	43.069	510	2
93	53.456	0.403	0	255	21.535	255	1
94	96.188	0	0	0	0	0	0
95	73.133	0	0	0	0	0	0
96	78.031	0.276	0	255	21.535	255	1
97	60.128	0	0	0	0	0	0
98	104.21	0.207	0	255	21.535	255	1
99	98.468	0.656	0	255	64.604	765	3
100	66.461	0.324	0	255	21.535	255	1
101	34.962	0	0	0	0	0	0
102	107.926	0.399	0	255	43.069	510	2
103	125.323	0.344	0	255	43.069	510	2
104	59.114	0	0	0	0	0	0
105	94.499	0	0	0	0	0	0
106	75.751	0.284	0	255	21.535	255	1
107	78.031	0.276	0	255	21.535	255	1
108	46.025	0.468	0	255	21.535	255	1
109	62.492	0.345	0	255	21.535	255	1
110	80.227	0.268	0	255	21.535	255	1
111	59.114	0.364	0	255	21.535	255	1
112	70.853	0	0	0	0	0	0
113	73.217	0	0	0	0	0	0
114	81.578	0	0	0	0	0	0
115	109.024	0.395	0	255	43.069	510	2
116	57.425	0.375	0	255	21.535	255	1
117	92.303	0	0	0	0	0	0
118	109.277	0	0	0	0	0	0
119	71.866	0.3	0	255	21.535	255	1
120	117.047	0.184	0	255	21.535	255	1
121	72.795	0.296	0	255	21.535	255	1
122	111.811	0.578	0	255	64.604	765	3
123	68.488	0.314	0	255	21.535	255	1
124	131.15	0.164	0	255	21.535	255	1
125	84.196	0.767	0	255	64.604	765	3
126	61.732	0.698	0	255	43.069	510	2
127	122.198	0.881	0	255	107.673	1275	5
128	75.413	0.857	0	255	64.604	765	3
129	86.898	0.248	0	255	21.535	255	1
130	137.483	0	0	0	0	0	0
131	74.653	0.288	0	255	21.535	255	1
132	82.253	0.524	0	255	43.069	510	2
133	80.311	0	0	0	0	0	0
134	85.8	0.251	0	255	21.535	255	1
135	82.676	0.781	0	255	64.604	765	3
136	97.708	0	0	0	0	0	0
137	89.769	0.24	0	255	21.535	255	1
138	106.828	0.403	0	255	43.069	510	2
139	74.231	0.29	0	255	21.535	255	1
140	69.924	0.308	0	255	21.535	255	1
141	105.815	0.814	0	255	86.138	1020	4
142	115.695	0.931	0	255	107.673	1275	5
143	127.096	0.169	0	255	21.535	255	1
144	87.912	0	0	0	0	0	0
145	94.836	0.227	0	255	21.535	255	1
146	74.653	0	0	0	0	0	0
147	56.412	0	0	0	0	0	0
148	99.566	0.216	0	255	21.535	255	1
149	86.729	0	0	0	0	0	0
150	67.053	0.321	0	255	21.535	255	1
151	92.472	0.233	0	255	21.535	255	1
152	98.13	0.219	0	255	21.535	255	1
153	125.491	0.172	0	255	21.535	255	1
154	97.201	0.222	0	255	21.535	255	1
155	112.402	0	0	0	0	0	0
156	265.255	0.325	0	255	86.138	1020	4
157	106.575	0.202	0	255	21.535	255	1
158	84.618	0.254	0	255	21.535	255	1
159	90.614	0.713	0	255	64.604	765	3
160	83.014	0	0	0	0	0	0
161	99.059	0.217	0	255	21.535	255	1
162	93.739	0.23	0	255	21.535	255	1
163	88.925	0	0	0	0	0	0
164	52.527	0	0	0	0	0	0
165	87.405	0	0	0	0	0	0
166	90.783	0.237	0	255	21.535	255	1
167	33.02	0	0	0	0	0	0
168	105.308	0.204	0	255	21.535	255	1
169	133.43	0	0	0	0	0	0
170	80.396	0.268	0	255	21.535	255	1
171	98.974	0.218	0	255	21.535	255	1
172	83.182	0.259	0	255	21.535	255	1
173	67.644	0	0	0	0	0	0
174	176.33	0.122	0	255	21.535	255	1
175	85.885	0	0	0	0	0	0
176	71.613	0.601	0	255	43.069	510	2
177	50.585	0.426	0	255	21.535	255	1
178	97.961	0	0	0	0	0	0
179	99.734	0.216	0	255	21.535	255	1
180	80.987	0.266	0	255	21.535	255	1
181	120.002	0	0	0	0	0	0
182	91.036	0.237	0	255	21.535	255	1
183	118.398	0.909	0	255	107.673	1275	5
184	97.792	0.881	0	255	86.138	1020	4
185	84.702	0.254	0	255	21.535	255	1
186	71.022	0.303	0	255	21.535	255	1
187	65.87	0.327	0	255	21.535	255	1
188	105.477	0.612	0	255	64.604	765	3
189	96.863	0	0	0	0	0	0
190	86.56	0.746	0	255	64.604	765	3
191	106.49	0.202	0	255	21.535	255	1
192	55.99	0	0	0	0	0	0
193	115.442	0.187	0	255	21.535	255	1
194	95.596	0.225	0	255	21.535	255	1
195	81.831	0	0	0	0	0	0
196	80.396	0	0	0	0	0	0
197	113.837	0	0	0	0	0	0
198	141.875	0.304	0	255	43.069	510	2
199	140.101	0.307	0	255	43.069	510	2
200	97.877	0	0	0	0	0	0
201	55.483	0	0	0	0	0	0
202	117.047	0	0	0	0	0	0
203	86.983	0.743	0	255	64.604	765	3
204	60.466	0	0	0	0	0	0
205	107.673	0.2	0	255	21.535	255	1
206	63.759	0.675	0	255	43.069	510	2
207	59.79	0	0	0	0	0	0
208	121.522	0.177	0	255	21.535	255	1
209	75.498	0.285	0	255	21.535	255	1
210	60.043	0.359	0	255	21.535	255	1
211	51.936	0	0	0	0	0	0
212	118.398	0.182	0	255	21.535	255	1
213	67.222	0.32	0	255	21.535	255	1
214	112.74	0.191	0	255	21.535	255	1
215	82.338	0.262	0	255	21.535	255	1
216	47.545	0.453	0	255	21.535	255	1
217	113.584	0	0	0	0	0	0
218	52.443	0.411	0	255	21.535	255	1
219	57.172	0	0	0	0	0	0
220	143.141	0.301	0	255	43.069	510	2
221	104.886	0.205	0	255	21.535	255	1
222	66.377	0.324	0	255	21.535	255	1
223	89.685	0.48	0	255	43.069	510	2
224	42.225	0	0	0	0	0	0
225	109.277	0	0	0	0	0	0
226	56.412	0	0	0	0	0	0
227	38.002	0	0	0	0	0	0
228	80.818	0.266	0	255	21.535	255	1
229	68.404	0	0	0	0	0	0
230	56.834	0.758	0	255	43.069	510	2
231	47.714	0.451	0	255	21.535	255	1
232	123.549	0	0	0	0	0	0
233	88.503	0.487	0	255	43.069	510	2
234	114.26	0	0	0	0	0	0
235	83.942	0	0	0	0	0	0
236	73.555	0	0	0	0	0	0
237	122.789	0.175	0	255	21.535	255	1
238	56.496	0.381	0	255	21.535	255	1
239	120.931	0.356	0	255	43.069	510	2
240	161.129	0.535	0	255	86.138	1020	4
241	92.218	0.234	0	255	21.535	255	1
242	87.067	0.247	0	255	21.535	255	1
243	42.647	0	0	0	0	0	0
244	69.502	0	0	0	0	0	0
245	40.367	0	0	0	0	0	0
246	40.958	0.526	0	255	21.535	255	1
247	39.944	0	0	0	0	0	0
248	34.371	0.627	0	255	21.535	255	1
249	35.553	0	0	0	0	0	0

[truncated: 2 more sheets: SCR Olaparib exp2, SCR Fasudil exp2]
