# Supplementary material for: Inhibitors of Rho kinases (ROCK) induce multiple mitotic defects and synthetic lethality in BRCA2-deficient cells
Source: eLife journal article supplement (doi:10.7554/elife.80254), 2023-04-19
Supplement: supp [file Figure 3- figure supplement 1- source data 2.xlsx]

## Sheet: experimento 1
Labelling scheme and IdU track lengths of shScramble and shBRCA2 HCT116p21-/- cells treated with HU for 4 hours
scr nt	scr hu	b2 nt	b2 hu
5.161	4.748	9.165	4.627
8.553	14.6	10.83	7.286
5.624	5.013	8.991	1.788
10.17	3.557	8.077	1.782
5.112	8.74	12.753	6.118
7.569	5.632	8.142	4.833
8.296	7.018	11.991	2.655
7.845	10.679	6.045	5.183
10.481	10.997	11.82	1.214
7.322	9.579	3.903	4.512
6.753	9.277	5.415	2.493
14.896	15.746	8.611	1.986
11.287	5.946	6.804	6.623
7.193	11.697	4.028	3.485
10.995	12.673	9.042	1.403
4.201	12.04	6.033	5.389
6.229	3.477	13.327	5.228
9.599	10.599	4.441	2.973
12.028	3.734	7.104	1.62
13.374	10.365	6.977	2.894
13.592	11.526	6.639	1.739
10.983	6.911	9.43	3.533
10.112	7.897	15.311	2.387
17.24	9.582	12.986	1.37
14.811	8.102	11.71	1.214
11.818	8.227	10.225	2.232
6.392	5.686	5.598	3.165
9.402	7.25	7.408	2.88
7.285	6.424	7.768	2.094
18.323	5.008	3.375	3.276
9.487	14.263	12.95	2.219
11.385	8.362	7.347	2.913
10.767	11.807	5.934	5.611
6.034	5.041	7.809	3.178
15.66	10.505	7.926	5.638
10.141	3.986	9.874	5.784
12.885	10.646	7.3	3.81
14.423	7.079	6.583	1.672
13.747	7.378	6.744	2.328
9.941	5.84	12.567	2.612
4.175	11.44	5.618	3.299
9.554	14.065	3.838	2.078
11.245	9.405	5.748	7.327
6.054	7.856	6.56	2.869
11.277	6.313	10.024	5.371
4.438	7.813	11.112	4.711
14.582	8.3	10.438	8.329
4.839	7.313	7.292	5.126
8.122	7.325	9.034	8.225
12.414	5.197	7.884	2.145
8.731	7.454	4.882	5.101
7.213	7.934	11.803	5.166
5.308	9.353	8.184	3.323
7.071	12.323	10.052	3.363
2.521	10.038	11.964	3.137
9.468	8.76	3.495	4.65
10.953	7.914	12.75	4.755
7.776	6.623	8.871	4.652
5.567	9.948	15.776	2.38
6.827	10.064	3.01	4.317
6.81	7.347	11.204	2.799
4.484	12.869	10.508	4.519
6.704	11.166	10.959	5.416
5.648	9.802	8.275	3.655
8.245	13.042	10.229	4.703
9.393	7.384	1.748	5.622
10.638	9.401	8.324	2.798
6.175	9.24	6.17	3.226
5.816	7.717	6.75	2.54
6.238	5.681	6.682	4.362
7.75	8.118		2.564
7.919	10.417		3.104
	9.524		3.682
	3.366		2.339
	3.883		3.976
	10.941		3.754
	8.538		5.89
	11.597		6.55
	4.565		2.289
	12.269		3.086
	7.287		2.96
			3.908
			1.717
			2.022
			3.226
			3.914
			3.226
			3.341
			4.619
			1.952
			3.537
			5.536
			3.375
			5.028
			6.059
			1.935
			6.005
9.04265			7.445
			2.495
			4.949
			4.092
			2.094
	8.60777	8.40239	8.424
			5.082
			2.631
			3.192

## Sheet: experimento 2
scr - nt no hu	scr - hu	b2 - no hu	b2 - hu
6.062	8.142	7.809	6.843
2.201	6.21	7.519	3.61
4.656	4.716	3.58	2.472
3.71	6.849	7.126	5.517
6.73	6.544	1.252	3.026
8.32	9.344	3.305	2.967
13.849	5.205	4.317	4.906
14.67	9.338	9.227	2.76
5.556	8.109	5.211	3.985
6.73	7.598	2.622	3.239
3.169	7.417	7.19	5.112
3.001	6.111	6.067	2.725
3.156	7.156	6.777	6.096
8.385	6.204	5.985	3.524
4.007	6.203	7.848	2.289
4.177	6.002	6.043	6.804
5.802	8.303	8.21	4.93
3.937	6.304	10.783	3.476
7.131	2.219	9.513	5.256
8.2	7.873	5.388	3.758
9.319	7.077	9.124	2.015
5.424	8.161	7.089	5.015
6.724	8.223	9.551	5.818
4.144	8.588	6.231	7.499
8.667	8.37	5.384	5.428
6.615	6.338	10.597	5.081
9.568	9.176	8.441	3.485
6.521	9.347	9.114	3.433
6.731	10.375	8.054	3.228
3.298	8.238	6.345	4.457
3.74	1.652	3.331	2.472
4.571	8.371	10.22	2.556
7.533	5.923	3.163	3.537
9.637	2.147	8.99	2.663
10.597	5.34	8.395	3.276
7.623	3.372	4.977	2.578
6.651	7.074	6.761	2.772
7.569	7.016	7.289	2.015
6.681	6.409	8.63	1.729
6.04	3.776	2.153	2.038
5.309	5.357	8.776	2.01
8.163	7.361	7.871	3.605
7.957	4.799	3.582	7.856
9.413	4.41	3.087	7.953
7.842	7.352	6.535	4.155
4.282	5.326	7.801	4.291
3.948	5.835	8.584	5.13
7.613	2.931	5.436	5.529
6.362	5.737	10.28	2.894
3.546	6.472	3.771	7.653
6.293	8.518	3.494	2.758
7.549	8.265	7.956	3.613
5.315	7.693	4.589	3.165
4.769	4.855	4.069	3.866
6.184	8.551	6.328	2.879
8.015	3.958	3.891	1.683
5.954	5.613	7.876	3.058
10.58	7.227	8.31	2.445
4.35	1.544	5.635	2.543
6.634	2.549	5.054	2.283
4.777	6.993	7.418	2.927
5.277	3.746	4.963	3.354
6.619	7.266	4.767	2.283
5.687	5.216	7.487	4.226
8.957	9.207	2.291	2.464
5.709	2.566	7.317	2.987
8.403	5.963	6.36	1.986
5.345	3.874	8.418	3.937
9.239	6.47	8.717	1.882
5.302	9.68	8.992	1.788
6.022	5.827	7.689	3.563
6.45	3.693	9.941	2.724
7.44	4.974	4.438	4.21
9.413	4.504	5.966	3.834
6.744	7.851	4.906	2.887
8.288	6.315	7.642	2.808
7.053	6.063	3.605	4.147
5.636	3.241	2.295	6.732
6.077	4.447	6.4	4.487
4.097	5.679	6.276	2.987
5.76	4.506	7.722	5.292
3.859	8.306	8.139	3.391
7.911	6.523	2.479	2.967
9.593	6.918	5.008	4.07
5.398	1.604	3.391	4.714
5.324	7.542	7.413	4.663
9.824	8.255	7.83	5.112
10.764	7.094	6.602	4.367
2.982	8.43	6.805	4.365
7.231	4.905	2.219	2.063
6.654	8.061	4.096	5.143
7.85	8.268	5.738	2.718
9.39	3.232	6.216	5.706
2.271	6.128	4.994	4.069
8.589	6.355	8.584	8.122
5.892	2.894	7.251	3.739
	3.478	6.442
	7.662	4.198
	6.59	6.89
	3.176	7.967
	5.352	7.687
		6.465
		9.71
		6.493
		6.305
		7.557
		2.609
#DIV/0!
