# Supplementary material for: Inhibitors of Rho kinases (ROCK) induce multiple mitotic defects and synthetic lethality in BRCA2-deficient cells
Source: eLife journal article supplement (doi:10.7554/elife.80254), 2023-04-19
Supplement: supp [file Figure 3- figure supplement 1- source data 3.xlsx]

## Sheet: PEO4-6 dias-NT
	BrdU intensity in experiments from Figure 3E. PEO4 (grey circles) and PEO1 (blue circles) cells after 3 or 6 days of Fasudil treatment
		Area	Intensity
	1	0.244	72.258
	2	0.337	14.178
	3	0.133	15.489
	4	0.148	14.487
	5	0.38	71.528
	6	0.403	15.1
	7	0.319	85.823
	8	0.425	57.612
	9	0.222	16.525
	10	0.334	74.093
	11	0.176	15.633
	12	0.429	57.026
	13	0.244	16.555
	14	0.247	15.679
	15	0.204	11.911
	16	0.243	15.954
	17	0.242	16.375
	18	0.171	10.608
	19	0.347	75.636
	20	0.235	16.347
	21	0.145	12.884
	22	0.206	86.713
	23	0.239	16.701
	24	0.177	14.411
	25	0.205	11.432
	26	0.233	13.408
	27	0.23	14.367
	28	0.243	16.684
	29	0.289	95.352
	30	0.226	12.941
	31	0.255	16.694
	32	0.175	14.64
	33	0.136	13.555
	34	0.282	102.862
	35	0.225	16.472
	36	0.212	74.47
	37	0.248	13.932
	38	0.24	38.11
	39	0.221	16.161
	40	0.214	15.79
	41	0.29	102.884
	42	0.429	78.849
	43	0.229	42.08
	44	0.116	15.837
	45	0.238	108.88
	46	0.18	16.252
	47	0.264	42.376
	48	0.306	96.692
	49	0.217	16.447
	50	0.381	64.124
	51	0.256	107.235
	52	0.21	61.004
	53	0.242	101.212
	54	0.312	75.097
	55	0.187	14.347
	56	0.169	14.618
	57	0.313	90.55
	58	0.33	82.33
	59	0.233	89.228
	60	0.344	15.032
	61	0.21	15.591
	62	0.243	53.879
	63	0.176	14.136
	64	0.365	72.724
	65	0.177	13.691
	66	0.332	82.944
	67	0.281	15.257
	68	0.318	16.527
	69	0.291	74.845
	70	0.2	14.568
	71	0.264	91.151
	72	0.388	15.774
	73	0.225	88.49
	74	0.243	84.582
	75	0.395	72.173
	76	0.179	14.411
	77	0.188	14.623
	78	0.338	96.89
	79	0.325	67.977
	80	0.299	11.376
	81	0.309	79.083
	82	0.236	16.761
	83	0.222	108.825
	84	0.149	14.886
	85	0.277	75.174
	86	0.286	100.439
	87	0.184	15.182
	88	0.198	13.921
	89	0.301	52.589
	90	0.18	15.545
	91	0.275	74.95
	92	0.257	90.051
	93	0.225	73.144
	94	0.254	14.8
	95	0.288	69.485
	96	0.217	16.617
	97	0.174	80.216
	98	0.202	14.572
	99	0.263	17.563
	100	0.142	70.722
	101	0.194	13.853
	102	0.208	15.5
	103	0.147	13.501
	104	0.218	15.646
	105	0.158	12.767
	106	0.239	14.593
	107	0.2	15.026
	108	0.192	14.324
	109	0.185	12.755
	110	0.337	64.077
	111	0.383	75.311
	112	0.252	93.887
	113	0.461	52.05
	114	0.164	14.583
	115	0.223	14.362
	116	0.167	14.129
	117	0.233	14.746
	118	0.186	14.822
	119	0.488	13.975
	120	0.258	77.696
	121	0.151	12.273
	122	0.145	14.214
	123	0.176	15.599
	124	0.169	15.187
	125	0.215	14.521
	126	0.305	13.819
	127	0.205	14.818
	128	0.314	68.6
	129	0.196	16.054
	130	0.185	14.775
	131	0.323	13.666
	132	0.164	13.627
	133	0.296	45.68
	134	0.334	15.788
	135	0.484	15.733
	136	0.214	15.546
	137	0.18	14.55
	138	0.197	15.056
	139	0.203	104.47
	140	0.252	14.999
	141	0.218	14.565
	142	0.19	15.69
	143	0.409	14.126
	144	0.17	12.581
	145	0.481	14.524
	146	0.232	39.24
	147	0.364	61.65
	148	0.169	15.069
	149	0.226	14.963
	150	0.346	35.215
	151	0.224	13.81
	152	0.24	13.051
	153	0.198	14.176
	1	0.17	12.543
	2	0.167	12.141
	3	0.164	14.717
	4	0.399	25.726
	5	0.103	10.302
	6	0.175	12.493
	7	0.189	14.084
	8	0.179	77.244
	9	0.149	14.157
	10	0.184	13.078
	11	0.132	72.511
	12	0.102	13.268
	13	0.175	13.338
	14	0.319	70.07
	15	0.188	12.614
	16	0.209	104.11
	17	0.144	10.831
	18	0.21	15.28
	19	0.18	16.379
	20	0.397	16.694
	21	0.163	13.935
	22	0.227	107.408
	23	0.167	12.562
	24	0.325	16.137
	25	0.238	18.186
	26	0.17	12.167
	27	0.209	15.595
	28	0.294	14.764
	29	0.303	88.574
	30	0.222	14.88
	31	0.151	10.996
	32	0.207	16.666
	33	0.179	65.531
	34	0.179	11.86
	35	0.19	13.757
	36	0.213	13.651
	37	0.266	87.783
	38	0.303	83.712
	39	0.305	14.96
	40	0.174	12.554
	41	0.237	12.452
	42	0.195	14.76
	43	0.212	14.698
	44	0.24	91.494
	45	0.218	108.34
	46	0.197	12.538
	47	0.136	13.841
	48	0.142	10.961
	49	0.295	85.291
	50	0.281	82.334
	51	0.218	12.53
	52	0.377	61.661
	53	0.223	14.314
	54	0.237	15.923
	55	0.26	14.992
	56	0.219	74.803
	57	0.217	106.372
	58	0.356	14.726
	59	0.169	14.006
	60	0.227	15.251
	61	0.251	56.852
	62	0.342	46.02
	63	0.421	30.719
	64	0.348	76.384
	65	0.153	11.467
	66	0.212	13.898
	67	0.281	14.576
	68	0.378	63.533
	69	0.264	14.929
	70	0.437	13.895
	71	0.219	16.67
	72	0.206	11.917
	73	0.36	14.838
	74	0.249	15.72
	75	0.412	14.426
	76	0.339	73.818
	77	0.287	69.741
	78	0.245	15.21
	79	0.437	15.937
	80	0.333	23.972
	81	0.166	14.623
	82	0.287	54.596
	83	0.202	14.608
	84	0.299	16.405
	85	0.287	13.677
	86	0.187	11.778
	87	0.29	14.349
	88	0.233	14.856
	89	0.229	13.254
	90	0.263	60.017
	91	0.213	14.931
	92	0.376	79.986
	93	0.307	51.011
	94	0.323	85.685
	95	0.27	31.234
	96	0.309	98.42
	97	0.17	76.693
	98	0.927	67.194
	99	0.434	15.382
	100	0.332	85.525
	101	0.16	15.612
	102	0.365	73.259
	103	0.26	16.333
	104	0.383	15.105
	105	0.17	13.36
	106	0.202	13.835
	107	0.283	42.979
	108	0.31	16.91
	109	0.274	52.738
	110	0.336	14.713
	111	0.325	98.191
	112	0.295	93.024
	113	0.384	62.157
	114	0.252	14.516
	115	0.172	14.903
	116	0.283	15.327
	117	0.334	86.114
	118	0.206	14.248
	119	0.24	69.842
	120	0.34	82.228
	121	0.215	13.112
	122	0.23	13.659
	123	0.248	13.985
	124	0.312	86.678
	125	0.187	14.242
	126	0.237	13.206
	127	0.248	13.257
	128	0.309	24.647
	129	0.189	12.927
	130	0.272	65.335
	1	0.17	12.543
	2	0.167	12.141
	3	0.164	14.717
	4	0.399	25.726
	5	0.103	10.302
	6	0.175	12.493
	7	0.189	14.084
	8	0.179	77.244
	9	0.149	14.157
	10	0.184	13.078
	11	0.132	72.511
	12	0.102	13.268
	13	0.175	13.338
	14	0.319	70.07
	15	0.188	12.614
	16	0.209	104.11
	17	0.144	10.831
	18	0.21	15.28
	19	0.18	16.379
	20	0.397	16.694
	21	0.163	13.935
	22	0.227	107.408
	23	0.167	12.562
	24	0.325	16.137
	25	0.238	18.186
	26	0.17	12.167
	27	0.209	15.595
	28	0.294	14.764
	29	0.303	88.574
	30	0.222	14.88
	31	0.151	10.996
	32	0.207	16.666
	33	0.179	65.531
	34	0.179	11.86
	35	0.19	13.757
	36	0.213	13.651
	37	0.266	87.783
	38	0.303	83.712
	39	0.305	14.96
	40	0.174	12.554
	41	0.237	12.452
	42	0.195	14.76
	43	0.212	14.698
	44	0.24	91.494
	45	0.218	108.34
	46	0.197	12.538
	47	0.136	13.841
	48	0.142	10.961
	49	0.295	85.291
	50	0.281	82.334
	51	0.218	12.53
	52	0.377	61.661
	53	0.223	14.314
	54	0.237	15.923
	55	0.26	14.992
	56	0.219	74.803
	57	0.217	106.372
	58	0.356	14.726
	59	0.169	14.006
	60	0.227	15.251
	61	0.251	56.852
	62	0.342	46.02
	63	0.421	30.719
	64	0.348	76.384
	65	0.153	11.467
	66	0.212	13.898
	67	0.281	14.576
	68	0.378	63.533
	69	0.264	14.929
	70	0.437	13.895
	71	0.219	16.67
	72	0.206	11.917
	73	0.36	14.838
	74	0.249	15.72
	75	0.412	14.426
	76	0.339	73.818
	77	0.287	69.741
	78	0.245	15.21
	79	0.437	15.937
	80	0.333	23.972
	81	0.166	14.623
	82	0.287	54.596
	83	0.202	14.608
	84	0.299	16.405
	85	0.287	13.677
	86	0.187	11.778
	87	0.29	14.349
	88	0.233	14.856
	89	0.229	13.254
	90	0.263	60.017
	91	0.213	14.931
	92	0.376	79.986
	93	0.307	51.011
	94	0.323	85.685
	95	0.27	31.234
	96	0.309	98.42
	97	0.17	76.693
	98	0.927	67.194
	99	0.434	15.382
	100	0.332	85.525
	101	0.16	15.612
	102	0.365	73.259
	103	0.26	16.333
	104	0.383	15.105
	105	0.17	13.36
	106	0.202	13.835
	107	0.283	42.979
	108	0.31	16.91
	109	0.274	52.738
	110	0.336	14.713
	111	0.325	98.191
	112	0.295	93.024
	113	0.384	62.157
	114	0.252	14.516
	115	0.172	14.903
	116	0.283	15.327
	117	0.334	86.114
	118	0.206	14.248
	119	0.24	69.842
	120	0.34	82.228
	121	0.215	13.112
	122	0.23	13.659
	123	0.248	13.985
	124	0.312	86.678
	125	0.187	14.242
	126	0.237	13.206
	127	0.248	13.257
	128	0.309	24.647
	129	0.189	12.927
	130	0.272	65.335

## Sheet: PEO4-6 dias-F128
Pic		Area	Intensity
511	1	0.467	14.1
	2	0.218	11.92
	3	0.419	14.933
	4	0.417	14.873
	5	0.215	13.118
	6	0.262	14.582
	7	0.427	12.494
	8	0.467	15.607
	9	0.174	21.244
	10	0.41	18.482
	11	0.258	13.642
	12	0.335	75.475
	13	0.377	50.16
	14	0.153	14.691
	15	0.359	68.047
	16	0.49	12.89
	17	0.437	14.885
	18	0.45	73.969
	19	0.384	14.572
	20	0.347	93.001
	21	0.438	13.505
	22	0.274	14.695
	23	0.517	16.299
	24	0.126	13.988
	25	0.125	11.9
	26	0.271	15.181
	27	0.344	13.633
	28	0.105	14.072
	29	0.397	14.811
	30	0.379	88.756
	31	0.297	15.348
	32	0.8	75.315
	33	0.296	18.001
	34	0.295	72.701
	35	0.438	15.985
	36	0.38	19.415
	37	0.473	16.312
	38	0.348	90.551
	39	0.426	70.506
	40	0.408	59.921
	41	0.544	80.768
	42	0.524	89.358
	43	0.308	14.074
	44	0.343	26.992
	45	0.365	48.007
	46	0.348	87.625
	47	0.368	15.584
	48	0.361	15.082
	49	0.28	16.312
	50	0.712	13.68
	51	0.47	28.704
	52	0.261	13.944
	53	0.345	69.903
	54	0.334	74.868
	55	0.207	15.903
	56	0.382	16.001
	57	0.178	25.767
	58	0.477	14.999
	59	0.134	13.625
	60	0.228	54.564
	61	0.158	106.991
	62	0.206	19.217
	1	0.28	16.149
	2	0.439	12.839
	3	0.311	22.923
	4	0.724	21.644
	5	0.336	89.979
	6	0.363	18.849
	7	0.41	13.687
	8	0.308	49.281
	9	0.396	68.936
	10	0.347	70.828
	11	0.574	14.342
	12	0.215	55.397
	13	0.426	26.701
	14	0.257	26.846
	15	0.532	49.127
	16	0.241	37.205
	17	0.317	14.313
	18	0.143	14
	19	0.118	14.151
	20	0.386	23.171
	21	0.31	69.5
	22	0.462	14.981
	23	0.54	14.855
	24	0.379	74.532
	25	0.654	15.188
	26	0.582	18.78
	27	0.327	82.525
	28	0.135	23.651
	29	0.451	14.28
	30	0.352	83.357
	31	0.483	15.217
	32	0.476	62.094
	33	0.471	15.334
	34	0.324	37.974
	35	0.476	65.109
	36	0.571	24.912
	37	0.314	16.485
	38	0.411	14.042
	39	0.251	15.313
	40	0.388	67.194
	41	0.242	13.563
	42	0.612	88.112
	43	0.246	15.798
	44	0.125	60.39
	45	0.237	15.239
	46	0.535	14.974
	47	0.606	63.154
	48	0.741	13.231
	49	0.364	14.689
	50	0.411	13.903
	51	0.504	16.25
	52	0.237	16.745
	53	0.42	14.069
	54	0.267	15.329
	55	0.124	14.441
	56	0.746	69.971
	57	1.372	11.052
	58	0.31	14.992
	59	0.533	31.445
	60	0.421	14.428
	61	0.506	61.881
	62	0.46	14.844
	63	0.286	14.712
	64	0.354	20.042
	65	0.266	12.039
	66	0.113	26.174
	67	0.314	62.43
	1	0.263	13.677
	2	0.175	13.982
	3	0.705	17.068
	4	0.345	14.43
	5	0.79	14.931
	6	0.273	14.24
	7	0.482	13.776
	8	0.289	15.668
	9	0.244	13.49
	10	0.302	66.28
	11	0.38	38.882
	12	0.2	56.823
	13	0.868	14.126
	14	0.275	17.996
	15	0.432	72.993
	16	0.226	14.477
	17	0.162	33.917
	18	0.26	95.583
	19	0.777	19.44
	20	0.266	15.879
	21	0.213	13.855
	22	0.252	15.111
	23	0.325	78.859
	24	0.349	43.44
	25	0.19	23.039
	26	0.707	36.031
	27	0.443	19.135
	28	0.493	15.148
	29	0.331	71.822
	30	0.167	13.322
	31	0.354	43.983
	32	0.239	14.335
	33	0.265	20.29
	34	0.429	40.227
	35	0.56	25.026
	36	0.331	50.841
	37	0.463	82.991
	38	0.361	14.68
	39	0.425	15.607
	40	0.669	61.227
	41	0.245	15.757
	42	0.465	18.367
	43	0.441	30.019
	44	0.351	22.883
	45	0.378	36.506
	46	0.198	12.712
	47	0.243	14.932
	48	0.274	15.19
	49	0.162	35.792
	50	0.384	83.963
	51	0.429	34.35
	52	0.234	73.924
	53	0.399	61.147
	54	0.258	17.929
	55	0.412	16.02
	56	0.285	13.45
	57	0.498	48.023
	58	0.255	17.839
	59	0.461	15.805
	60	0.384	39.078
	61	0.234	15.982
	62	0.207	14.923
	63	0.531	14.427
	64	0.47	12.953
	65	0.441	16.115
	66	0.216	13.253
	67	0.218	15.68
	68	0.239	14.84
	69	0.225	14.434
	70	0.167	14.975
	71	0.477	59.298
	1	0.437	14.801
	2	0.375	14.941
	3	0.25	15.039
	4	0.655	14.368
	5	0.322	14.3
	6	0.463	14.237
	7	0.415	15.046
	8	0.316	96.726
	9	0.258	40.422
	10	0.146	16.251
	11	0.269	12.694
	12	0.323	13.445
	13	0.244	17.617
	14	0.414	13.833
	15	0.296	85.207
	16	0.157	15.116
	17	0.419	14.942
	18	0.287	39.882
	19	0.242	13.793
	20	0.337	13.213
	21	0.508	14.758
	22	0.183	13.472
	23	0.191	21.143
	24	0.513	15.052
	25	0.324	15.178
	26	0.418	43.331
	27	0.699	14.663
	28	0.19	13.807
	29	0.375	13.823
	30	0.114	13.317
	31	0.229	16.184
	32	0.403	95.378
	33	0.239	15.736
	34	0.129	15.045
	35	0.387	14.519
	36	0.242	14.889
	37	0.305	79.172
	38	0.479	16.121
	39	0.43	14.42
	40	0.174	49.396
	41	0.247	15.484
	42	0.398	40.251
	43	0.238	16.045
	44	0.806	29.531
	45	0.302	83.893
	46	0.618	19.491
	47	0.422	61.187
	48	0.347	14.85
	49	0.222	18.938
	50	0.287	41.015
	51	0.378	62.509
	52	0.259	14.344
	53	0.37	43.027
	54	0.41	56.246
	55	0.142	15.657
	56	0.101	18.775
	57	0.317	15.004
	58	0.373	30.544
	59	0.16	15.469
	60	0.614	53.74
	61	0.26	15.476
	62	0.13	38.217
	63	0.513	20.306
	64	0.18	13.241
	65	0.376	37.811
	66	0.264	32.132
	67	0.249	15.236
	68	0.731	27.457
	69	0.212	13.844
	70	0.333	50.689
	71	0.286	12.331
	72	0.331	66.079
	73	0.37	60.084
	74	0.398	14.125
	75	0.709	15.509
	76	0.194	12.703
	77	0.367	14.061
	78	0.422	13.436
	79	0.324	14.459
	80	0.38	14.453
	81	0.213	13.543
	1	0.391	16.037
	2	0.204	14.765
	3	0.372	18.455
	4	0.287	81.921
	5	0.295	57.892
	6	0.452	50.082
	7	0.135	70.836
	8	0.313	99.556
	9	0.4	143.439
	10	0.354	29.706
	11	0.523	137.908
	12	0.247	92.773
	13	0.484	17.258
	14	0.355	20.737
	15	0.308	112.48
	16	0.298	106.408
	17	0.324	107.587
	18	0.452	16.747
	19	0.184	13.595
	20	0.229	15.05
	21	0.134	18.828
	22	0.297	17.943
	23	0.312	105.182
	24	0.411	49.644
	25	0.296	18.687
	26	0.396	42.025
	27	0.286	57.992
	28	0.349	63.475
	29	0.347	67.524
	30	0.299	19.775
	31	0.367	20.775
	32	0.443	71.868
	33	0.349	17.321
	34	0.285	39.609
	35	0.478	14.789
	36	0.301	31.188
	37	0.247	17.75
	38	0.26	19.775
	39	0.66	12.931
	40	0.238	18.523
	41	0.165	38.584
	42	0.496	16.524
	43	0.248	32.468
	1	0.452	117.822
	2	0.415	74.117
	3	0.282	80.709
	4	0.23	24.375
	5	0.379	45.268
	6	0.382	25.307
	7	0.215	22.248
	8	0.48	18.311
	9	0.383	16.344
	10	0.249	14.894
	11	0.242	19.444
	12	0.535	60.956
	13	0.241	18.395
	14	0.256	21.072
	15	0.264	16.409
	16	0.261	18.198
	17	0.434	15.699
	18	0.154	20.32
	19	0.241	19.122
	20	0.338	98.261
	21	0.202	19.876
	22	0.293	132.498
	23	0.673	31.873
	24	0.367	88.089
	25	0.281	19.394
	26	0.426	20.476
	27	0.305	65.702
	28	0.363	17.462
	29	0.275	19.495
	30	0.276	52.236
	31	0.662	95.052
	32	0.436	16.259
	33	0.268	19.495
	1	0.456	17.619
	2	0.417	14.689
	3	0.427	103.884
	4	0.327	17.014
	5	0.38	70.772
	6	0.394	121.177
	7	0.329	131.139
	8	0.384	17.417
	9	0.405	16.793
	10	0.447	28.373
	11	0.356	76.397
	12	0.373	80.241
	13	0.133	42.746
	14	0.499	53.232
	15	0.258	17.405
	16	0.179	16.374
	17	0.211	17.977
	18	0.323	68.556
	19	0.468	17.429
	20	0.173	15.374
	21	0.202	21.261
	22	0.248	15.277
	23	0.199	14.343
	24	0.387	16.109
	25	0.429	14.009
	26	0.226	11.887
	27	0.368	137.834
	28	0.158	15.625
	29	0.319	136.422
	30	0.521	17.704
	31	0.402	93.04
	32	0.236	19.21
	33	1.089	29.604
	34	0.491	59.211
	35	0.334	72.349
	36	0.567	54.373
	37	0.413	17.047
	38	0.479	55.158
	39	0.449	18.323
	40	0.479	14.758
	41	0.368	84.429
	42	0.2	86.498
	43	0.293	140.373
	44	0.326	65.545
	45	0.282	138.77
	46	0.304	128.817
	47	0.284	141.512
	48	0.2	13.67
	49	0.43	13.73
	50	0.139	12.385
	51	0.25	16.142
	52	0.407	51.591

## Sheet: PEO1-6 dias-NT
Pic		Area	Intensity
Pic 536	1	0.283	66.451	Positiva		Cut threshold at 20
	2	0.224	15.198	Negativa
	3	0.248	15.558	Negativa
	4	0.201	15.615	Negativa
	5	0.227	13.71
	6	0.162	16.097	Negativa
	7	0.166	14.904
	8	0.225	14.141
	9	0.246	14.199	Negativa
	10	0.338	66.621	Positiva
	11	0.234	15.166
	12	0.25	83.831	Positiva
	13	0.32	66.67	Positiva
	14	0.235	14.316	Negativa
	15	0.367	64.035	Positiva
	16	0.365	68.325	Positiva
	17	0.233	14.269
	18	0.429	54.819
	19	0.22	15.782
	20	0.28	38.768	Positiva
	21	0.286	14.635	Negativa
	22	0.144	70.365
	23	0.3	93.978
	24	0.371	79.163
	25	0.272	78.903
	26	0.157	11.943
	27	0.214	15.816
	28	0.259	24.135
	29	0.249	16.323
	30	0.229	15.978
	31	0.187	14.061
	32	0.225	12.71
	33	0.25	14.058
	34	0.355	74.394	Positiva
	35	0.23	13.967
	36	0.231	15.039
	37	0.207	15.313
	38	0.441	54.572
	39	0.251	16.155
	40	0.211	14.67
	41	0.215	14.032
	42	0.252	81.722
	43	0.432	25.28	Positiva
	44	0.202	14.994
	45	0.232	16.428
	46	0.196	13.062
	47	0.216	16.064
	48	0.223	15.096
	49	0.383	39.088
	50	0.234	13.931
	51	0.28	103.084
	52	0.288	103.184
	53	0.203	14.345
	54	0.205	16.55
	55	0.246	41.998
	56	0.353	16.482
	57	0.251	14.575
	58	0.227	14.678
	59	0.248	14.951
	60	0.212	15.247
	61	0.4	15.456
	62	0.358	14.1
	63	0.234	14.643
	64	0.188	15.537
	65	0.226	14.409
	66	0.234	15.308
	67	0.131	15.635
	68	0.137	16.315
	69	0.192	14.91
	70	0.316	17.902
	71	0.367	69.459
	72	0.236	13.612
	73	0.191	14.991
	74	0.203	14.566
	75	0.237	14.402
	76	1.396	32.757
	77	0.224	14.603
	78	0.278	94.328
	79	0.23	61.95
	80	0.278	96.195
	81	0.2	13.639
	82	0.234	14.786
	83	0.241	14.067
	84	0.258	15.13
	85	0.222	15.853
	86	0.234	15.041
	87	0.197	14.564
	88	0.209	16
	89	0.23	15.731
	90	0.188	16.331
	91	0.35	68.314
	92	0.225	15.495
	93	0.223	118.15
	94	0.228	14.816
	95	0.249	14.696
	96	0.318	74.941
	97	0.285	100.376
	98	0.208	15.798
	99	0.261	15.224
	100	0.254	14.931
	101	0.188	14.138
	102	0.17	15.973
	103	0.309	105.283
	104	0.352	16.365
	105	0.392	85.879
	106	0.222	16.089
	107	0.172	16.534
	108	0.22	16.342
	109	0.131	14.021
	110	0.213	15.625
	111	0.406	14.711
	112	0.237	14.385
	113	0.349	60.314
	114	0.356	14.88
	115	0.199	15.481
	116	0.246	14.257
	117	0.418	17.791
	118	0.465	15.452
	119	0.27	114.911
	120	0.378	16.058
	121	0.228	109.07
	122	0.211	14.771
	123	0.418	27.036
	124	0.227	15.383
	125	0.252	94.88
	126	0.24	14.995
	127	0.31	97.519
	128	0.34	96.432
	129	0.189	15.632
	130	0.153	14.425
	131	0.305	111.817
	132	0.321	15.091
	133	0.14	14.364
	134	0.209	14.072
	135	0.351	81.141
	136	0.989	78.574
	137	0.274	15.815
	138	0.237	13.708
	139	0.114	14.858
	140	0.19	14.401
	141	0.231	15.61
	142	0.233	14.791
	143	0.251	14.591
	144	0.185	15.433
	145	0.234	14.885
	146	0.311	41.386
	147	0.279	115.067
	148	0.272	125.925
	149	0.261	16.454
	150	0.243	15.335
	151	0.259	16.351
	152	0.324	71.379
	153	0.335	79.943
Pic 535	1	0.247	13.685
	2	0.235	14.062
	3	0.288	13.431
	4	0.261	14.384
	5	0.324	14.84
	6	0.249	13.853
	7	0.245	14.435
	8	0.25	14.305
	9	0.893	32.449
	10	0.213	14.238
	11	0.278	30.934
	12	0.376	13.722
	13	0.39	67.107
	14	0.22	14.621
	15	0.278	14.634
	16	0.243	13.84
	17	0.274	14.242
	18	0.317	92.719
	19	0.347	14.018
	20	0.253	14.133
	21	0.267	15.626
	22	0.338	52.823
	23	0.192	14.139
	24	0.78	15.044
	25	0.25	41.593
	26	0.285	15.22
	27	0.263	14.6
	28	0.395	14.608
	29	0.276	14.379
	30	0.257	18.714
	31	0.413	64.204
	32	0.285	15.327
	33	0.237	15.234
	34	0.239	28.374
	35	0.256	12.554
	36	0.267	15.021
	37	0.251	104.655
	38	0.389	71.172
	39	0.252	15.362
	40	0.223	14.356
	41	0.387	68.688
	42	0.348	15.763
	43	0.251	13.423
	44	0.337	94.576
	45	0.303	93.488
	46	0.217	13.042
	47	0.268	22.832
	48	0.203	13.537
	49	0.294	14.58
	50	0.41	15.599
	51	0.43	68.461
	52	0.165	14.043
	53	0.396	78.495
	54	0.381	82.754
	55	0.233	14.921
	56	0.227	15.446
	57	0.373	86.185
	58	0.242	14.994
	59	0.259	14.164
	60	0.252	15.208
	61	0.424	71.4
	62	0.191	79.114
	63	0.348	87.401
	64	0.299	95.151
	65	0.283	14.928
	66	0.238	15.288
	67	0.218	13.21
	68	0.233	12.564
	69	0.299	15.487
	70	0.244	15.341
	71	0.24	15.088
	72	0.232	13.592
	73	0.235	13.109
	74	0.382	76.454
	75	0.318	87.88
	76	0.259	13.599
	77	0.26	14.066
	78	0.207	13.31
	79	0.264	14.776
	80	0.277	16.04
	81	0.501	17.138
	82	0.245	12.874
	83	0.326	110.639
	84	0.216	15.519
	85	0.2	12.737
	86	0.262	15.239
	87	0.249	14.79
	88	0.278	17.419
	89	0.321	36.184
	90	0.317	97.683
	91	0.269	15.232
	92	0.381	53.535
	93	0.432	83.043
	94	0.514	27.132
	95	0.296	24.252
	96	0.28	15.979
	97	0.204	15.312
	98	0.249	14.208
	99	0.237	14.959
	100	0.296	15.543
	101	0.255	14.872
	102	0.304	16.289
	103	0.348	14.138
	104	0.218	15.591
	105	0.289	15.861
	106	0.241	16.018
	107	0.331	110.532
	108	0.237	14.401
	109	0.234	14.573
	110	0.258	14.385
	111	0.238	15.468
	112	0.29	103.033
	113	0.252	14.975
	114	0.231	14.448
	115	0.231	14.868
	116	0.23	14.439
	117	0.295	103.089
	118	0.247	14.453
	119	0.249	15.736
	120	0.268	125.109
	121	0.448	18.881
	122	0.266	14.913
	123	0.244	45.241
	124	0.248	15.708
	125	0.247	13.807
	126	0.192	41.049
	127	0.229	13.916
	128	0.213	14.198
	129	0.246	14.394
	130	0.4	15.832
	131	0.225	13.674
	132	0.237	14.576
	133	0.385	14.803
	134	0.224	13.515
	135	0.329	90.494
	136	0.135	13.889
	137	0.239	14.058
	138	0.21	13.807
	139	0.587	12.942
	140	0.232	13.904
	141	0.206	13.281
	142	0.289	92.194
Pic 537	1	0.267	16.336
	2	0.269	14.605
	3	0.387	81.939
	4	0.25	14.442
	5	0.109	12.662
	6	0.377	20.436
	7	0.427	15.535
	8	0.37	73.61
	9	0.294	14.393
	10	0.273	16.033
	11	0.427	14.986
	12	0.272	14.023
	13	0.437	53.93
	14	0.267	14.582
	15	0.242	15.087
	16	0.322	77.27
	17	0.492	25.138
	18	0.285	14.391
	19	0.299	14.96
	20	0.28	13.484
	21	0.436	44.314
	22	0.273	39.843
	23	0.531	14.602
	24	0.285	14.106
	25	0.293	15.366
	26	0.268	14.201
	27	0.32	14.594
	28	0.479	58.754
	29	0.428	24.61
	30	0.287	15.473
	31	0.316	14.989
	32	0.279	13.714
	33	0.274	13.576
	34	0.399	74.066
	35	0.256	14.64
	36	0.254	13.878
	37	0.283	14.741
	38	0.287	14.882
	39	0.471	64.408
	40	0.257	15.331
	41	0.51	14.871
	42	0.147	13.898
	43	0.316	14.205
	44	0.48	14.372
	45	0.315	97.716
	46	0.275	14.077
	47	0.246	13.909
	48	0.305	14.253
	49	0.293	15.217
	50	0.504	15.34
	51	0.29	15.22
	52	0.319	88.148
	53	0.28	15.787
	54	0.287	16.008
	55	0.284	15.11
	56	0.17	12.319
	57	0.234	14.339
	58	0.224	15
	59	0.342	77.869
	60	0.245	13.562
	61	0.315	93.48
	62	0.293	15.486
	63	0.239	13.312
	64	0.472	53.12
	65	0.523	61.041
	66	0.263	103.967
	67	0.209	14.606
	68	0.424	73.752
	69	0.328	14.67
	70	0.224	12.839
	71	0.212	15.334
	72	0.249	15.658
	73	0.547	15.641
	74	0.325	68.596
	75	0.231	12.649
	76	0.362	60.546
	77	0.271	76.361
	78	0.31	14.502
	79	0.217	13.725
	80	0.492	69.967
	81	0.312	15.08
	82	0.437	72.785
	83	0.229	16.268
	84	0.17	12.804
	85	0.235	67.027
	86	0.188	13.36
	87	0.319	57.325
	88	0.19	12.201
	89	0.428	79.336
	90	0.282	15.912
	91	0.278	15.33
	92	0.231	13.126
	93	0.222	14.524
	94	0.22	11.483
	95	0.317	15.844
	96	0.335	99.053
	97	0.262	13.65
	98	0.23	12.413
	99	0.232	14.421
	100	0.252	14.722
	101	0.343	15.205
	102	0.204	11.706
	103	0.43	14.375
	104	0.446	16.112
	105	0.208	13.009
	106	0.193	15.139
	107	0.234	12.187
	108	0.243	53.339
	109	0.327	12.321
	110	0.142	10.675
	111	0.175	47.54
	112	0.3	15.604
	113	0.31	15.188
	114	0.232	12.277
	115	0.3	15.868
	116	0.431	67.797
	117	0.373	54.577
	118	0.198	13.701
	119	0.18	10.712
	120	0.238	13.087
	121	0.254	94.546
	122	0.177	11.32
	123	0.176	13.838
	124	0.264	13.362
	125	0.311	15.007
	126	0.309	77.313
	127	0.27	14.024

## Sheet: PEO1-6 dias-F128
		Area	Intensity
Pic 540	1	0.152	14.606
	2	0.532	16.002
	3	0.264	15.578
	4	0.191	13.817
	5	0.224	14.223
	6	0.314	21.825
	7	0.495	25.302
	8	0.704	98.857
	9	0.567	15.4
	10	0.318	48.769
	11	1.401	15.282
	12	0.283	16.065
	13	0.581	60.125
	14	0.397	73.01
	15	0.545	15
	16	0.468	13.865
	17	0.392	16.851
	18	0.338	15.109
	19	0.335	33.481
	20	0.407	73.105
	21	0.205	52.373
	22	0.304	15.444
	23	0.641	83.719
	24	0.747	15.288
	25	1.107	81.37
	26	0.217	14.045
	1	0.529	36.227
	2	0.425	75.944
	3	0.249	13.931
	4	0.191	14.093
	5	0.243	14.244
	6	0.338	30.526
	7	0.544	14.406
	8	0.307	44.811
	9	0.391	15.793
	10	0.262	77.788
	11	0.299	84.488
	12	0.457	64.101
	13	1.412	27.014
	14	0.407	55.186
	15	0.308	38.682
	16	0.465	24.573
	17	0.402	54.972
	18	0.562	12.959
	19	0.393	13.119
	20	0.584	14.648
	21	0.417	50.102
	22	0.419	17.939
	23	0.329	36.477
	24	0.315	30.643
	1	0.307	13.298
	2	0.584	13.78
	3	0.595	44.77
	4	0.323	13.378
	5	0.275	14.439
	6	0.341	96.137
	7	0.654	14.595
	8	0.341	13.151
	9	0.505	15.457
	10	0.965	52.091
	11	0.321	78.542
	12	0.374	16.483
	13	0.363	14.03
	14	0.293	57.736
	15	0.434	85.934
	16	0.523	15.537
	17	0.317	14.475
	18	0.489	13.963
	19	0.265	14.03
	20	0.534	74.199
	21	0.359	99.714
	22	0.205	13.75
	23	0.67	14.171
	24	0.627	28.889
	25	0.279	62.189
	26	0.205	13.569
	27	0.335	86.575
	28	0.545	57.024
	29	0.289	69.923
	30	0.511	88.649
	31	0.459	63.221
	1	0.373	15.151
	2	0.32	21.165
	3	0.303	31.742
	4	0.224	72.511
	5	0.185	13.349
	6	0.814	106.489
	7	0.326	16.39
	8	0.158	14.097
	9	0.198	64.194
	10	0.199	14.945
	11	0.372	62.509
	12	0.372	34.4
	13	0.287	30.284
	14	0.6	15.198
	15	0.328	14.777
	16	0.447	14.861
	17	0.379	13.228
	18	0.35	49.624
	19	0.356	65.515
	20	0.37	33.04
	21	0.315	80.349
	22	0.398	15.338
	23	0.419	15.677
	24	0.325	82.78
	25	0.266	15.714
	26	1.317	52.194
	27	0.25	16.086
	28	0.21	16.201
	29	0.608	19.813
	30	0.349	16.248
	31	0.219	15.531
	32	0.224	17.249
	33	0.392	15.585
	34	0.222	19.2
	35	0.429	15.532
	1	0.619	51.72
	2	0.644	45.808
	3	0.144	14.65
	4	0.297	18.385
	5	0.215	76.389
	6	0.365	16.198
	7	0.218	16.655
	8	1.284	20.796
	9	0.177	14.683
	10	0.267	15.524
	11	0.196	17.406
	12	0.338	16.475
	13	0.211	16.101
	14	0.216	16.417
	15	0.175	14.757
	16	0.219	58.698
	17	0.258	75.119
	18	0.168	14.003
	19	0.248	17.68
	20	0.226	15.91
	21	0.25	77.848
	22	0.203	15.756
	23	0.237	14.483
	1	0.294	14.228
	2	0.315	14.58
	3	0.18	13.835
	4	0.174	15.246
	5	0.197	14.509
	6	0.335	15.895
	7	0.321	32.122
	8	0.311	21.173
	9	0.28	75.824
	10	0.175	13.519
	11	0.455	22.056
	12	0.351	16.654
	13	0.4	87.583
	14	0.373	13.306
	15	0.271	37.447
	16	0.135	34.534
	17	0.327	14.629
	18	0.411	100.617
	19	1.223	16.505
	20	0.882	60.612
	21	0.309	17.348
	22	0.462	45.432
	23	0.479	15.914
	24	0.321	69.913
	25	0.374	67.352
	26	0.307	15.288
	27	0.46	27.033
	28	0.369	76.273
	29	0.266	15.267
	30	0.432	30.209
	31	0.549	15.58
	32	0.531	57.523
	33	0.588	14.076
	34	0.367	62.864
	35	0.474	52.905
	1	0.553	16.037
	2	0.369	22.857
	3	0.533	16.553
	4	0.41	17.661
	5	0.449	118.258
	6	0.425	18.758
	7	0.532	16.894
	8	0.437	63.059
	9	0.714	61.427
	10	0.605	103.285
	11	0.889	26.736
	12	0.372	60.952
	13	0.394	62.239
	14	0.898	105.234
	15	0.432	15.771
	16	0.483	17.097
	17	0.517	16.141
	18	0.56	18.231
	19	0.529	16.42
	20	0.118	42.97
	1	0.91	44.671
	2	0.599	127.409
	3	0.242	14.999
	4	0.249	14.947
	5	1.215	132.851
	6	0.364	96.93
	7	0.301	85.173
	8	0.447	16.627
	9	0.266	16.388
	10	0.529	16.129
	11	0.276	16.444
	12	0.33	27.218
	13	0.383	17.011
	14	0.662	19.891
	15	0.576	15.594
	16	0.491	24.191
	17	0.241	16.104
	18	0.574	16.066
	19	0.264	15.809
	20	0.409	16.316
	1	0.309	12.362
	2	0.308	12.44
	3	0.335	12.889
	4	0.628	48.997
	5	0.706	45.61
	6	0.405	39.584
	7	0.308	13.613
	8	0.66	15.695
	9	0.325	12.712
	10	0.336	13.222
	11	0.382	35.873
	12	0.312	13.675
	13	0.561	16.799
	14	0.263	14.271
	15	0.26	14.156
	16	0.307	13.882
	17	0.469	23.784
	18	0.392	12.93
	19	0.61	14.206
	20	0.622	16.773
	21	0.383	13.319
	22	0.398	39.119
	23	0.29	13.405
	24	0.365	31.385
	25	0.32	13.834
	26	0.487	12.507
	27	0.326	13.693
	28	0.408	17.817
	1	0.721	36.477
	2	0.54	21.413
	3	0.698	36.529
	4	0.508	36.299
	5	0.678	14.343
	6	0.176	12.433
	7	0.561	14.154
	8	0.238	13.34
	9	0.42	15.141
	10	0.284	15.407
	11	0.241	53.45
	12	0.427	60.145
	13	0.272	15.092
	14	0.401	15.591
	15	0.45	15.645
	16	0.387	34.65
	17	0.503	16.788
	18	0.34	15.132
	19	0.377	17.294
	20	0.382	57.586
	21	0.359	42.289
	22	0.385	37.847
	23	0.433	82.239
	24	0.25	16.664
	25	0.366	20.632
	26	0.159	16.441
	27	0.402	15.668
	28	0.404	27.406
	29	0.239	16.08
	1	0.647	94.983
	2	0.408	50.465
	3	0.167	16.18
	4	0.332	19.524
	5	0.224	57.183
	6	0.353	16.766
	7	0.22	17.213
	8	0.129	19.438
	9	0.215	96.686
	10	0.308	95.825
	11	0.113	17.198
	12	0.338	74.736
	13	0.598	128.12
	14	0.266	114.981
	15	0.391	34.728
	16	0.132	16.473
	17	0.113	43.024
	18	0.135	39.983
	19	0.284	107.956
	20	0.399	18.414
	21	0.217	15.741
	22	0.248	31.453
	23	0.343	17.602
	24	0.201	25.248
	25	0.126	18.264
	26	0.22	17.247
	27	0.194	80.544
	28	0.47	16.871
	29	0.263	17.21
	1	0.329	12.729
	2	0.26	13.509
	3	0.452	72.07
	4	1.605	73.889
	5	0.287	14.492
	6	0.366	14.123
	7	0.55	14.987
	8	0.473	54.125
	9	0.657	14.207
	10	0.987	16.191
	11	0.729	81.701
	12	0.396	72.996
	13	1.293	15.518
	14	0.308	15.215
	15	0.404	59.77
	16	0.86	17.434
	17	0.495	62.463
	18	1.028	102.711
	19	0.311	54.847
	20	0.502	14.826
	21	0.466	28.003
	1	0.251	17.82
	2	0.261	16.105
	3	0.269	16.567
	4	0.708	66.591
	5	0.429	17.205
	6	0.339	114.958
	7	0.275	18.052
	8	0.211	15.723
	9	0.248	15.93
	10	0.254	18.354
	11	0.291	18.353
	12	0.347	17.452
	13	0.267	18.163
	14	0.385	18.276
	15	0.467	14.539
	16	0.249	16.535
	17	0.604	16.123
	18	0.279	18.714
	19	0.246	15.677
	20	0.315	30.945
	21	0.251	16.693
	22	0.488	18.211
	23	0.147	19.31
	24	0.276	15.331
	25	0.353	106.768
	26	0.472	17.414
	27	0.324	17.13
	28	0.16	16.319
	29	0.32	16.428
	30	0.307	108.722
	31	0.472	58.125
	32	0.372	89.485
	33	0.318	17.658
	34	0.486	74.042
	1	0.191	58.639
	2	0.344	16.789
	3	0.391	93.494
	4	0.231	111.744
	5	0.309	16.006
	6	0.301	62.778
	7	0.366	110.101
	8	0.561	16.941
	9	0.626	15.742
	10	0.501	22.812
	11	0.155	17.369
	12	0.345	103.653
	13	0.388	99.527
	14	0.58	17.252
	15	0.449	27.817
	16	0.706	16.9
	17	0.468	14.316
	18	0.388	18.41
	19	0.762	17.598
	20	0.322	15.096
	21	0.252	16.346
	22	0.405	16.487
	23	0.251	16.55
	24	0.416	16.902
	25	0.87	16.32
	26	0.223	16.109
	27	0.427	16.66
	28	0.279	15.21
	29	0.497	16.715
	30	0.28	14.703
	31	0.362	26.76
	1	0.173	50.818
	2	0.197	14.864
	3	0.331	16.996
	4	0.255	16.161
	5	0.239	43.567
	6	0.337	17.799
	7	0.29	16.039
	8	0.339	18.957
	9	0.357	19.057
	10	0.211	15.707
	11	0.454	20.18
	12	0.231	15.804
	13	0.383	16.982
	14	1.524	19.817
	15	0.274	32.056
	16	0.127	15.048
	17	0.238	15.995
	18	0.233	16.29
	19	0.298	112.494
	20	0.534	15.461
	21	0.281	15.982
	22	0.501	15.5
	23	0.252	16.773
	24	0.137	85.458
	25	0.158	111.227
	26	0.243	16.242
	27	0.201	56.815
	28	0.44	16.748
	29	0.403	86.394
	30	0.268	113.518
	31	0.334	16.319
	32	0.324	57.118
	33	0.362	92.956

## Sheet: Cutoff 6 dias
PEO4				PEO1
	NT	F128			NT	Fasudil 128
	23.972	20.042			20.436	20.18
	23.972	20.29			22.832	20.632
	24.647	20.306			24.135	20.796
	24.647	20.32			24.252	21.165
	25.726	20.476			24.61	21.173
	25.726	20.737			25.138	21.413
	30.719	20.775			25.28	21.825
	30.719	21.072			27.036	22.056
	31.234	21.143			27.132	22.812
	31.234	21.244			28.374	22.857
	35.215	21.261			30.934	23.784
	38.11	21.644			32.449	24.191
	39.24	22.248			32.757	24.573
	42.08	22.883			36.184	25.248
	42.376	22.923			38.768	25.302
	42.979	23.039			39.088	26.736
	42.979	23.171			39.843	26.76
	45.68	23.651			41.049	27.014
	46.02	24.375			41.386	27.033
	46.02	24.912			41.593	27.218
	51.011	25.026			41.998	27.406
	51.011	25.307			44.314	27.817
	52.05	25.767			45.241	28.003
	52.589	26.174			47.54	28.889
	52.738	26.701			52.823	30.209
	52.738	26.846			53.12	30.284
	53.879	26.992			53.339	30.526
	54.596	27.457			53.535	30.643
	54.596	28.373			53.93	30.945
	56.852	28.704			54.572	31.385
	56.852	29.531			54.577	31.453
	57.026	29.604			54.819	31.742
	57.612	29.706			57.325	32.056
	60.017	30.019			58.754	32.122
	60.017	30.544			60.314	33.04
	61.004	31.188			60.546	33.481
	61.65	31.445			61.041	34.4
	61.661	31.873			61.95	34.534
	61.661	32.132			64.035	34.65
	62.157	32.468			64.204	34.728
	62.157	33.917			64.408	35.873
	63.533	34.35			66.451	36.227
	63.533	35.792			66.621	36.299
	64.077	36.031			66.67	36.477
	64.124	36.506			67.027	36.477
	65.335	37.205			67.107	36.529
	65.335	37.811			67.797	37.447
	65.531	37.974			68.314	37.847
	65.531	38.217			68.325	38.682
	67.194	38.584			68.461	39.119
	67.194	38.882			68.596	39.584
	67.977	39.078			68.688	39.983
	68.6	39.609			69.459	42.289
	69.485	39.882			69.967	42.97
	69.741	40.227			70.365	43.024
	69.741	40.251			71.172	43.567
	69.842	40.422			71.379	44.671
	69.842	41.015			71.4	44.77
	70.07	42.025			72.785	44.811
	70.07	42.746			73.61	45.432
	70.722	43.027			73.752	45.61
	71.528	43.331			74.066	45.808
	72.173	43.44			74.394	48.769
	72.258	43.983			74.941	48.997
	72.511	45.268			76.361	49.624
	72.511	48.007			76.454	50.102
	72.724	48.023			77.27	50.465
	73.144	49.127			77.313	50.818
	73.259	49.281			77.869	51.72
	73.259	49.396			78.495	52.091
	73.818	49.644			78.574	52.194
	73.818	50.082			78.903	52.373
	74.093	50.16			79.114	52.905
	74.47	50.689			79.163	53.45
	74.803	50.841			79.336	54.125
	74.803	51.591			79.943	54.847
	74.845	52.236			81.141	54.972
	74.95	53.232			81.722	55.186
	75.097	53.74			81.939	56.815
	75.174	54.373			82.754	57.024
	75.311	54.564			83.043	57.118
	75.636	55.158			83.831	57.183
	76.384	55.397			85.879	57.523
	76.384	56.246			86.185	57.586
	76.693	56.823			87.401	57.736
	76.693	57.892			87.88	58.125
	77.244	57.992			88.148	58.639
	77.244	59.211			90.494	58.698
	77.696	59.298			92.194	59.77
	78.849	59.921			92.719	60.125
	79.083	60.084			93.48	60.145
	79.986	60.39			93.488	60.612
	79.986	60.956			93.978	60.952
	80.216	61.147			94.328	61.427
	82.228	61.187			94.546	62.189
	82.228	61.227			94.576	62.239
	82.33	61.881			94.88	62.463
	82.334	62.094			95.151	62.509
	82.334	62.43			96.195	62.778
	82.944	62.509			96.432	62.864
	83.712	63.154			97.519	63.059
	83.712	63.475			97.683	63.221
	84.582	65.109			97.716	64.101
	85.291	65.545			99.053	64.194
	85.291	65.702			100.376	65.515
	85.525	66.079			103.033	66.591
	85.525	66.28			103.084	67.352
	85.685	67.194			103.089	69.913
	85.685	67.524			103.184	69.923
	85.823	68.047			103.967	72.07
	86.114	68.556			104.655	72.511
	86.114	68.936			105.283	72.996
	86.678	69.5			109.07	73.01
	86.678	69.903			110.532	73.105
	86.713	69.971			110.639	73.889
	87.783	70.506			111.817	74.042
	87.783	70.772			114.911	74.199
	88.49	70.828			115.067	74.736
	88.574	70.836			118.15	75.119
	88.574	71.822			125.109	75.824
	89.228	71.868			125.925	75.944
	90.051	72.349				76.273
	90.55	72.701				76.389
	91.151	72.993				77.788
	91.494	73.924				77.848
	91.494	73.969				78.542
	93.024	74.117				80.349
	93.024	74.532				80.544
	93.887	74.868				81.37
	95.352	75.315				81.701
	96.692	75.475				82.239
	96.89	76.397				82.78
	98.191	78.859				83.719
	98.191	79.172				84.488
	98.42	80.241				85.173
	98.42	80.709				85.458
	100.439	80.768				85.934
	101.212	81.921				86.394
	102.862	82.525				86.575
	102.884	82.991				87.583
	104.11	83.357				88.649
	104.11	83.893				89.485
	104.47	83.963				92.956
	106.372	84.429				93.494
	106.372	85.207				94.983
	107.235	86.498				95.825
	107.408	87.625				96.137
	107.408	88.089				96.686
	108.34	88.112				96.93
	108.34	88.756				98.857
	108.825	89.358				99.527
	108.88	89.979				99.714
		90.551				100.617
		92.773				102.711
		93.001				103.285
		93.04				103.653
		95.052				105.234
		95.378				106.489
		95.583				106.768
		96.726				107.956
		98.261				108.722
		99.556				110.101
		103.884				111.227
		105.182				111.744
		106.408				112.494
		106.991				113.518
		107.587				114.958
		112.48				114.981
		117.822				118.258
		121.177				127.409
		128.817				128.12
		131.139				132.851
		132.498
		136.422
		137.834
		137.908
		138.77
		140.373
		141.512
		143.439

## Sheet: PEO4-3dias-NT
Pic		Area	Intensity
496	1	0.239	16.165
	2	0.263	19.434
	3	0.385	25.214
	4	0.246	18.391
	5	0.619	53.544
	6	0.407	51.72
	7	0.255	14.629
	8	0.351	70.671
	9	0.233	16.483
	10	0.365	80.414
	11	0.235	15.353
	12	0.269	23.349
	13	0.302	90.461
	14	0.364	65.2
	15	0.247	17.047
	16	0.395	14.872
	17	0.284	29.393
	18	0.242	20.981
	19	0.173	15.037
	20	0.269	22.792
	21	0.185	16.113
	22	0.355	67.057
	23	0.262	78.543
	24	0.35	69.764
	25	0.231	19.53
	26	0.258	15.517
	27	0.388	17.296
	28	0.231	33.497
	29	0.4	53.808
	30	0.324	70.355
	31	0.251	18.019
	32	0.238	17.633
	33	0.259	48.257
	34	0.233	95.863
	35	0.383	56.093
	36	0.321	94.722
	37	0.292	84.082
	38	0.36	53.883
	39	0.263	81.521
	40	0.204	17.828
	41	0.24	79.517
497	1	0.25	66.46
	2	0.214	17.474
	3	0.358	24.297
	4	0.19	16.744
	5	0.281	61.278
	6	0.309	16.718
	7	0.262	71.846
	8	0.278	72.348
	9	0.306	71.451
	10	0.272	78.927
	11	0.331	33.151
	12	0.155	15.785
	13	0.177	98.441
	14	0.168	14.754
	15	0.239	17.5
	16	0.58	35.77
	17	0.399	17.709
	18	0.349	15.55
	19	0.202	110.404
	20	0.238	96.988
	21	0.164	15.811
	22	0.144	13.099
	23	0.121	12.969
	24	0.275	84.622
	25	0.147	13.018
	26	0.155	13.054
	27	0.198	96.374
	28	0.202	14.45
	29	0.118	15.014
	30	0.342	15.043
	31	1.869	31.584
	32	0.065	27.282
	33	0.247	82.616
	34	0.239	90.209
	35	0.225	13.524
	36	0.378	15.426
	37	0.329	78.469
	38	0.231	92.12
	39	0.119	15.792
	40	0.546	17.637
	41	0.275	80.219
	42	0.237	94.839
	43	0.28	48.652
	44	0.38	13.239
	45	0.212	16.804
	46	0.197	15.888
	47	0.109	17.448
	48	0.274	12.814
	49	0.172	14.462
	50	0.266	16.052
	51	0.197	15.945
	52	0.245	46.158
	53	0.173	15.326
	54	0.163	16.277
	55	0.199	20.237
	56	0.2	15.618
	57	0.25	80.292
	58	0.134	15.791
	59	0.161	16.157
	60	0.353	43.371
	61	0.216	15.936
	62	0.137	14.86
	63	0.207	117.378
	64	0.163	16.482
	65	0.156	114.295
	66	0.165	15.133
	67	0.324	26.073
	68	0.236	67.271
	69	0.177	16.063
	70	0.355	24.963
	71	0.288	15.154
	72	0.822	48.558
	73	0.179	16.415
	74	0.26	72.242
	75	0.16	15.843
	76	0.352	39.437
	77	0.37	52.839
	78	0.177	16.129
	79	0.119	17.809
	80	0.185	83.589
	81	0.209	16.134
	82	0.297	15.861
	83	0.203	97.198
	84	0.806	27.225
	85	0.166	16.215
	86	0.233	16.959
	87	0.221	15.541
	88	0.249	16.357
	89	0.132	100.27
	90	0.193	16.971
	91	0.18	15.741
	92	0.221	58.952
	93	0.186	91.066
	94	0.183	85.719
	95	0.271	67.871
	96	0.267	61.912
	97	0.22	94.38
	98	0.193	16.553
	99	0.142	16.576
	100	0.216	65.229
	101	0.215	85.541
	102	0.163	15.632
	103	0.289	50.766
	104	0.284	60.985
	105	0.161	20.011
	106	0.161	63.996
	1	0.341	14.614
	2	0.189	16.756
	3	0.19	16.742
	4	0.133	16.891
	5	0.207	19.14
	6	0.221	20.489
	7	0.689	33.721
	8	0.382	17.319
	9	0.373	17.096
	10	0.353	18.338
	11	0.156	19.525
	12	0.219	14.674
	13	0.909	35.025
	14	0.214	21.179
	15	0.568	53.704
	16	0.197	19.008
	17	0.235	15.672
	18	0.403	16.161
	19	0.191	15.24
	20	0.234	42.037
	21	0.203	17.764
	22	0.195	36.212
	23	0.223	15.869
	24	0.136	22.537
	25	0.204	25.4
	26	0.195	16.96
	27	0.247	18.524
	28	0.418	19.093
	29	0.176	57.034
	30	0.25	18.733
	31	0.356	18.138
	32	0.224	16.492
	33	0.26	79.49
	34	0.294	81.876
	35	0.233	16.687
	36	0.251	17.892
	37	0.368	51.015
	38	0.286	101.838
	39	0.235	21.509
	40	0.246	17.345
	41	0.316	87.018
	42	0.302	85.928
	43	0.36	25.471
	44	0.274	17.659
	45	0.354	79.958
	46	0.237	20.976
	47	0.21	15.61
	48	0.465	15.592
	49	0.31	79.9
	50	0.26	99.719
	51	0.34	17.46
	52	0.189	17.409
	53	0.272	21.285
	54	0.269	77.843
	55	0.272	79.699
	56	0.237	23.265
	57	0.207	55.305
	58	1.125	59.772
	59	0.209	13.716
	60	0.322	20.491
	61	0.196	94.956
	62	0.329	15.146
	63	0.194	14.523
	64	0.191	15.728
	1	0.182	14.651
	2	0.211	18.658
	3	0.4	16.325
	4	0.215	16.604
	5	0.195	13.266
	6	0.223	19.377
	7	0.195	19.933
	8	0.296	15.707
	9	0.126	14.889
	10	0.361	15.371
	11	0.184	18.379
	12	0.232	15.704
	13	0.262	16.811
	14	0.232	15.622
	15	0.195	122.047
	16	0.239	95.069
	17	0.191	17.181
	18	0.248	17.494
	19	0.205	21.12
	20	0.261	111.237
	21	0.361	18.79
	22	0.258	132.965
	23	0.213	16.613
	24	0.214	17.22
	25	0.203	18.577
	26	0.356	17.299
	27	0.315	81.516
	28	0.338	16.848
	29	0.305	100.36
	30	0.205	17.874
	31	0.248	22.493
	32	0.322	79.372
	33	0.242	17.732
	34	0.361	24.335
	35	0.53	16.371
	36	0.25	21.072
	37	0.24	21.61
	38	0.237	101.134
	39	0.242	16.741
	40	0.231	108.604
	41	0.248	113.341
	42	0.254	18.138
	43	0.263	18.123
	44	0.136	14.824
	45	0.207	17.252
	46	0.378	89.242
	47	0.46	18.001
	48	0.221	15.779
	49	0.257	19.724
	50	0.219	17.417
	51	0.209	17.497
	52	0.247	86.803
	53	0.242	17.374
	54	0.304	87.216
	55	0.455	21.173
	56	0.412	14.727
	57	0.372	15.667
	58	0.329	18.176
	59	0.231	18.23
	60	0.199	18.409
	61	0.245	22.532
	62	0.259	104.182
	63	0.32	34.847
	64	0.205	19.147
	65	0.215	16.138
	66	0.371	36.019
	67	0.178	15.506
	68	0.341	19.601
	69	0.212	94.574
	70	0.195	15.831
	71	0.201	17.948
	72	0.375	19.121
	73	0.333	66.351
	74	0.183	15.036
	75	0.223	66.11
	76	0.223	30.383
	77	0.195	103.418
	78	0.217	15.686
	79	0.246	16.112
	80	0.249	30.242
	81	0.384	67.872
	82	0.372	18.118
	83	0.309	80.179
	84	0.253	22.56
	1	0.308	52.394
	2	0.073	10.237
	3	0.194	86.28
	4	0.052	10.042
	5	0.274	15.293
	6	0.183	15.781
	7	0.189	24.946
	8	0.411	15.555
	9	0.167	16.201
	10	0.318	28.174
	11	0.149	14.826
	12	0.296	43.436
	13	0.326	17.411
	14	0.272	15.267
	15	0.284	15.068
	16	0.113	12.016
	17	0.336	15.226
	18	0.119	15.426
	19	0.185	15.472
	20	0.159	16.83
	21	0.13	13.204
	22	0.479	45.522
	23	0.173	14.293
	24	0.176	14.887
	25	0.188	19.048
	26	0.253	13.321
	27	0.17	15.655
	28	0.142	11.534
	29	0.195	16.691
	30	0.193	16.246
	31	0.17	15.611
	32	0.172	16.147
	33	0.213	16.723
	34	0.217	17.282
	35	0.145	72.515
	36	0.176	17.072
	37	0.348	14.909
	38	0.154	15.987
	39	0.149	13.917
	40	0.277	70.442
	41	0.182	16.181
	42	0.289	64.552
	43	0.146	81.331
	44	0.154	19.348
	45	0.3	16.727
	46	0.193	17.469
	47	0.264	16.74
	48	0.256	46.422
	49	0.16	16.526
	50	0.125	14.109
	51	0.146	17.195
	52	0.825	62.485
	53	0.29	59.313
	54	0.17	19.377
	55	0.166	14.519
	56	0.137	17.172
	57	0.287	111.702
	58	0.195	15.418
	59	0.333	76.457
	60	0.145	15.536
	61	0.158	16.424
	62	0.184	15.751
	63	0.143	15.945
	64	0.32	12.307
	65	0.17	16.864
	66	0.158	15.61
	67	0.443	24.145
	68	0.256	119.062
	69	0.208	69.339
	70	0.223	76.496
	71	0.291	108.882
	72	0.216	86.812
	73	0.38	18.176
	74	0.249	12.184
	75	0.232	85.134
	76	0.15	15.129
	77	0.172	16.793
	78	0.16	15.845
	79	0.123	15.387
	80	0.259	101.12
	81	0.242	104.352
	82	0.203	15.32
	83	0.131	15.289
	84	0.175	129.735
	85	1.007	70.966
	86	0.171	15.486
	87	0.293	16.085
	88	0.152	16.522
	89	0.142	11.51
	90	0.158	16.497
	91	0.132	16.841
	92	0.294	46.332
	93	0.236	114.831
	94	0.169	17.251
	95	0.259	82.164
	96	0.149	18.783
	97	0.171	15.324
	98	0.287	15.144
	99	0.22	104.244
	100	0.212	80.041
	101	0.183	101.08
	102	0.318	63.167
	103	0.079	21.023
	104	0.151	15.351
	105	0.222	96.84
	106	0.076	18.878
	107	0.089	16.037
	108	0.21	104.224
	109	0.245	100.663
	110	0.192	50.487
	111	0.142	63.449
	112	0.175	22.703
	113	0.274	82.664
	114	0.17	17.342
	115	0.31	20.294
	116	0.171	116.375
	117	0.315	65.458
	118	0.239	118.022
	119	0.18	104.943
	120	0.273	76.566
	121	0.287	83.741
	122	0.19	101.114
	123	0.158	18.045
	124	0.801	39.169
	125	0.33	63.008
	126	0.472	16.645
	127	0.161	14.572
	128	0.183	16.355
	129	0.297	44.556
	130	0.321	17.413
	131	0.192	113.882
	132	0.167	16.995
	133	0.196	84.272
	134	0.161	15.153

## Sheet: PEO4-3dias-F128
Pic		Area	Intensity
502	1	0.197	108.404
	2	0.206	14.261
	3	0.164	15.471
	4	0.36	23.534
	5	0.202	15.167
	6	0.198	14.619
	7	0.329	88.603
	8	0.217	13.805
	9	0.204	14.383
	10	0.21	13.86
	11	0.39	28.084
	12	0.206	14.013
	13	0.192	14.273
	14	0.277	97.079
	15	0.194	16.36
	16	0.229	15.352
	17	0.243	103.497
	18	0.239	79.917
	19	0.302	89.889
	20	0.179	16.029
	21	0.229	13.712
	22	0.53	83.326
	23	0.195	14.481
	24	0.215	89.514
	25	0.178	17.601
	26	0.33	70.945
	27	0.354	22.098
	28	0.303	80.856
	29	0.212	116.466
	30	0.181	77.064
	31	0.196	16.204
	32	0.218	17.845
	33	0.27	67.068
	34	0.2	14.386
	35	0.277	89.715
	36	0.458	18.347
	37	0.228	14.9
	38	0.248	15.736
	39	0.148	14.12
	40	0.301	91.038
	41	0.359	73.03
	42	0.206	94.18
	43	0.179	76.076
	44	0.308	94.027
	45	0.218	14.472
	46	0.289	85.44
	47	0.263	61.083
	48	0.247	36.531
	49	0.218	16.671
	50	0.311	37.243
	51	0.293	71.036
	52	0.202	14.916
	53	0.222	16.311
	54	0.216	17.189
	55	0.282	62.761
	56	0.264	16.07
	57	0.394	21.033
	58	0.245	84.754
	59	0.22	17.389
	60	0.227	21.965
	61	0.244	16.097
	62	0.242	14.021
	63	0.238	87.711
	64	0.839	64.296
	65	0.226	15.343
	66	0.26	14.597
	67	0.367	16.491
	68	0.201	14.157
	69	0.238	62.871
	70	0.267	14.085
	71	0.219	13.809
	72	0.254	17.751
	73	0.284	66.122
	74	0.236	14.626
	75	0.258	16.058
	76	0.282	27.236
	77	0.222	16.327
	78	0.228	14.104
	79	0.236	14.215
	80	0.23	14.958
	81	0.299	78.563
	82	0.229	13.907
	83	0.218	13.265
	84	0.177	13.887
	85	0.203	24.817
	86	0.212	13.59
	87	0.211	15.64
	88	0.203	13.294
	89	0.22	14.839
	90	0.189	84.725
	91	0.299	63.957
	92	0.182	14.129
	93	0.356	16.413
	94	0.219	15.566
	95	0.269	15.58
	96	0.226	67.189
	97	0.279	100.251
	98	0.209	13.001
	99	0.721	22.087
	100	0.143	13.995
	101	0.24	16.103
	102	0.205	11.473
	103	0.231	16.762
	104	0.24	26.285
	105	0.166	12.862
	106	0.544	34.706
	107	0.217	13.079
	108	0.338	23.923
	109	0.387	37.078
	110	0.209	14.82
	111	0.197	14.67
	112	0.241	13.953
	1	0.138	12.924
	2	0.207	17.579
	3	0.118	12.955
	4	0.277	15.03
	5	0.206	13.955
	6	0.225	16.167
	7	0.195	13.702
	8	0.249	14.13
	9	0.288	68.273
	10	0.498	46.025
	11	0.232	13.894
	12	0.248	13.647
	13	0.303	13.48
	14	0.239	13.137
	15	0.187	13.857
	16	0.214	12.823
	17	0.218	13.654
	18	0.278	14.392
	19	0.201	20.945
	20	0.153	17.449
	21	0.176	16.734
	22	0.253	14.748
	23	0.22	14.336
	24	0.224	13.16
	25	0.182	13.196
	26	0.229	15.998
	27	0.302	84.624
	28	0.247	16.405
	29	0.454	73.512
	30	0.31	61.163
	31	0.225	95.248
	32	0.283	17.041
	33	0.153	12.969
	34	0.279	17.877
	35	0.349	18.144
	36	0.311	65.7
	37	0.242	17.303
	38	0.356	26.604
	39	0.231	15.414
	40	0.182	13.357
	41	0.227	23.522
	42	0.257	13.469
	43	0.293	34.905
	44	0.155	13.487
	45	0.237	15.586
	46	0.149	18.961
	47	0.33	54.863
	48	0.312	65.143
	49	0.252	14.533
	50	0.363	46.651
	51	0.297	16.922
	52	0.247	14.538
	53	0.058	12.942
	54	0.105	14.88
	55	0.372	14.371
	56	0.246	13.647
	57	0.122	12.702
	58	0.188	22.324
	59	0.34	18.604
	60	0.292	43.801
	61	0.215	14.345
	62	0.192	14.933
	63	0.587	14.346
	64	0.24	13.11
	65	0.232	15.822
	66	0.208	14.474
	67	0.231	15.405
	68	0.251	17.546
	69	0.22	13.577
	70	0.189	14.736
	71	0.169	12.858
	72	0.361	14.422
	73	0.754	29.109
	74	0.254	78.506
	75	0.238	20.043
	76	0.464	15.515
	77	0.061	12.819
	78	0.367	31.175
	79	0.32	13.729
	80	0.447	15.481
	81	0.189	15.016
	82	0.629	21.018
	83	0.348	13.649
	84	0.22	77.92
	85	0.315	14.246
	86	0.233	14.189
	87	0.273	97.696
	88	0.45	18.098
	89	0.225	14.564
	90	0.6	32.171
	91	0.198	15.102
	92	0.433	17.513
	93	0.232	16.306
	94	0.332	59.219
	95	0.361	57.49
	1	0.259	12.854
	2	0.185	14.43
	3	0.232	13.595
	4	0.228	13.14
	5	0.216	14.624
	6	0.297	60.18
	7	0.32	56.021
	8	0.255	14.115
	9	0.343	13.327
	10	0.228	13.495
	11	0.312	74.632
	12	0.272	78.891
	13	0.296	17.71
	14	0.267	62.088
	15	0.3	84.147
	16	0.244	18.392
	17	0.324	13.742
	18	0.396	26.726
	19	0.481	45.855
	20	0.323	80.55
	21	0.265	13.244
	22	0.113	14.126
	23	0.389	19.173
	24	0.283	80.075
	25	0.236	81.635
	26	0.199	14.172
	27	0.26	14.785
	28	0.251	65.993
	29	0.32	39.556
	30	0.274	14.682
	31	0.339	56.7
	32	0.131	14.108
	33	0.207	17.702
	34	0.289	67.624
	35	0.246	72.342
	36	0.399	15.904
	37	0.243	19.23
	38	0.139	14.157
	39	0.374	23.641
	40	0.305	72.871
	41	0.112	12.982
	42	0.273	84.836
	43	0.215	13.944
	44	0.137	14.936
	45	0.149	14.194
	46	0.074	13.164
	47	0.238	15.559
	48	0.18	13.248
	49	0.204	14.819
	50	0.168	14.683
	51	0.289	16.481
	52	0.261	19.516
	53	0.212	13.255
	54	0.225	12.685
	55	0.32	13.776
	56	0.307	30.951
	57	0.21	12.989
	58	0.244	13.217
	59	0.183	12.611
	60	0.078	11.763
	61	0.204	12.991
	62	0.259	19.846
	63	0.177	13.906
	64	0.21	16.436
	65	0.202	13.039
	66	0.213	75.822
	67	0.327	17.155
	68	0.348	56.371
	69	0.349	13.748
	70	0.211	15.467
	71	0.262	98.137
	72	0.353	29.706
	73	0.224	12.68
	74	0.249	79.48
	75	0.657	33.379
	76	0.21	17.677
	77	0.231	17.319
	78	0.307	82.21
	79	0.236	82.91
	80	0.407	17.299
	81	0.181	14.154
	82	0.314	77.99
	83	0.274	14.269
	84	0.337	55.086
	85	0.214	13.065
	86	0.312	13.861
	87	0.199	13.536
	88	0.192	14
	89	0.338	73.264
	90	0.304	64.479
	91	0.077	14.831
	92	0.238	13.312
	93	0.397	13.645
	94	0.238	13.878
	95	0.318	31.789
	96	0.29	73.086
	97	0.172	84.579
	98	0.231	13.278
	99	0.408	101.712
	100	0.298	50.501
	101	0.326	26.381
	102	0.194	109.809
	1	0.119	14.587
	2	0.161	16.422
	3	0.21	15.113
	4	0.182	13.738
	5	0.117	13.652
	6	0.129	13.748
	7	0.252	77.362
	8	0.303	26.501
	9	0.193	15.505
	10	0.347	26.694
	11	0.377	16.822
	12	0.161	82.04
	13	0.322	15.191
	14	0.161	13.363
	15	0.176	12.418
	16	0.454	17.382
	17	0.218	33.845
	18	0.231	55.098
	19	0.486	29.271
	20	0.191	16.578
	21	0.166	14.168
	22	0.372	29.995
	23	0.259	78.857
	24	0.205	14.474
	25	0.259	67.834
	26	0.231	14.052
	27	0.331	24.595
	28	0.6	46.739
	29	0.433	71.789
	30	0.373	66.408
	31	0.382	15.246
	32	0.227	74.482
	33	0.185	64.026
	34	0.354	20.142
	35	0.204	16.409
	36	0.168	16.709
	37	0.214	14.605
	38	0.247	43.321
	39	0.311	70.686
	40	0.25	14.793
	41	0.254	17.221
	42	0.223	13.847
	43	0.214	14.381
	44	0.278	15.201
	45	0.198	14.798
	46	0.235	14.984
	47	0.256	18.152
	48	0.189	14.727
	49	0.358	20.077
	50	0.187	15.969
	51	0.342	70.62
	52	0.247	14.021
	53	0.209	15.9
	54	0.28	14.895
	55	0.374	16.4
	56	0.214	14.278
	57	0.252	15.083
	58	0.222	14.642
	59	0.191	14.223
	60	0.22	47.468
	61	0.2	14.74
	62	0.39	37.997
	63	0.174	15.919
	64	0.251	16.72
	65	0.236	14.324
	66	0.386	30.684
	67	0.212	14.358
	68	0.226	16.139
	69	0.191	14.547
	70	0.51	65.737
	71	0.368	74.283
	72	0.208	19.357
	73	0.282	66.873
	74	0.279	14.753
	75	0.196	14.31
	76	0.373	45.689
	77	0.356	20.772
	78	0.232	15.71
	79	0.274	14.735
	80	0.207	15.438
	81	0.2	14.797
	82	0.252	68.768
	83	0.184	87.072
	84	0.46	15.798
	85	0.359	15.79
	86	0.213	16.773
	87	0.218	15.607
	88	0.088	86.261
	89	0.317	38.093
	90	0.125	17.172
	91	0.253	16.897
	92	0.185	15.425
	93	0.173	15.046
	94	0.255	15.872
	95	0.199	14.268
	96	0.314	23.546
	97	0.298	43.644
	98	0.205	15.813
	99	0.339	19.914
	100	0.296	63.103
	101	0.653	37.569
	102	0.185	14.586
	103	0.21	13.822
	104	0.171	14.571
	105	0.373	15.645
	106	0.207	14.833
	107	0.455	14.539
	108	0.144	14.778
	109	0.414	20.014

## Sheet: PEO1-3dias-NT
Pic		Area	Intensity
522	1	0.233	13.871
	2	0.191	29.663
	3	0.201	14.338
	4	0.053	16.712
	5	0.383	16.093
	6	0.307	32.224
	7	0.502	18.009
	8	0.375	20.545
	9	0.828	14.035
	10	0.385	16.834
	11	0.245	103.773
	12	0.39	15.518
	13	0.206	14.472
	14	0.637	15.07
	15	0.507	16.891
	16	0.203	14.99
	17	0.194	16.551
	18	0.354	44.609
	19	0.174	13.899
	20	0.231	16.014
	21	0.479	15.53
	22	0.22	15.481
	23	0.301	105.079
	24	0.642	23.084
	25	0.195	15.973
	26	0.221	15.617
	27	0.374	70.369
	28	0.387	88.364
	29	0.149	15.327
	30	0.227	15.727
	31	0.284	16.229
	32	0.069	57.55
	33	0.242	16.146
	34	0.255	14.656
	35	0.22	97.951
	36	0.263	25.6
	37	0.22	14.841
	38	0.261	67.726
	39	0.249	110.838
	40	0.431	16.563
	41	0.238	17.002
	42	0.548	72.924
	43	0.2	95.998
	44	0.381	23.331
	45	0.219	14.583
	46	0.204	14.97
	47	0.228	16.403
	48	0.202	14.954
	49	0.234	131.282
	50	0.203	15.65
	51	0.24	15.189
	52	0.198	14.452
	53	0.239	15.699
	54	0.227	16.434
	55	0.22	14.99
	56	0.245	16.268
	57	0.234	14.162
	58	0.224	15.093
	59	0.217	15.489
	60	0.265	110.867
	61	0.212	15.584
	62	0.199	13.952
	63	0.154	11.792
	64	0.232	14.475
	65	0.298	15.559
	66	0.441	16.416
	67	0.259	102.895
	68	0.776	15.41
	69	0.217	16.437
	70	0.229	14.651
	71	0.198	17.982
	72	0.215	23.986
	73	0.179	14.476
	74	0.193	14.078
	75	0.238	19.043
	76	0.179	15.362
	77	0.401	16.028
	78	0.272	14.784
	79	0.755	22.514
	80	0.309	30.123
	81	0.323	21.477
	82	0.292	91.742
	83	0.301	75.55
	84	0.231	16.346
	1	0.154	12.833
	2	0.458	16.228
	3	0.211	14.523
	4	0.385	69.615
	5	0.203	14.514
	6	0.196	14.699
	7	0.188	42.284
	8	0.197	13.945
	9	0.211	12.72
	10	0.355	68.209
	11	0.201	13.796
	12	0.207	16.341
	13	0.206	14.396
	14	0.225	14.981
	15	0.062	14.538
	16	0.072	13.042
	17	0.233	17.296
	18	0.104	13.841
	19	0.203	17.435
	20	0.334	84.883
	21	0.323	94.556
	22	0.211	16.341
	23	0.159	15.681
	24	0.232	16.531
	25	0.2	17.645
	26	0.237	14.73
	27	0.369	54.167
	28	0.087	14.081
	29	0.429	14.344
	30	0.207	13.62
	31	0.179	14.299
	32	0.412	16.14
	33	0.213	14.111
	34	0.36	29.332
	35	0.177	14.288
	36	0.186	15.3
	37	0.212	14.229
	38	0.171	14.556
	39	0.531	14.256
	40	0.183	14.193
	41	0.233	14.727
	42	0.203	15.991
	43	0.313	87.433
	44	0.243	20.418
	45	0.225	14.818
	46	0.379	30.813
	47	0.173	15.121
	48	0.286	32.297
	49	0.252	90.714
	50	0.407	15.087
	51	0.178	14.562
	52	0.321	106.312
	53	0.234	15.083
	54	0.213	15.319
	55	0.228	15.943
	56	0.549	62.907
	57	0.297	84.598
	58	0.57	29.17
	59	0.23	20.142
	60	0.253	15.178
	61	0.222	15.967
	62	0.197	14.742
	63	0.22	14.06
	64	0.515	79.188
	65	0.213	15.915
	66	0.302	15.526
	67	0.323	95.573
	68	0.211	15.282
	69	0.227	15.96
	70	0.386	23.891
	71	0.201	89.101
	72	0.252	17.187
	73	0.264	38.637
	74	0.236	15.649
	75	0.275	100.735
	76	0.255	116.409
	77	0.367	23.218
	78	0.232	15.816
	79	0.216	16.079
	80	0.229	14.672
	81	0.217	15.323
	82	0.23	16.339
	83	0.223	29.295
	84	0.286	15.012
	85	0.229	14.766
	86	0.218	14.805
	87	0.211	19.559
	88	0.434	15.458
	89	0.055	81.306
	90	0.211	14.716
	91	0.291	111.831
	92	0.23	80.211
	93	0.209	96.79
	94	0.536	21.737
	95	0.206	18.007
	96	0.248	14.248
	97	0.72	61.607
	98	0.142	28.691
	99	0.233	16.225
	100	0.227	16.981
	101	0.199	16.033
	102	0.237	36.154
	103	0.224	15.182
	104	0.422	14.889
	105	0.254	17.605
	106	0.187	47.652
	107	0.243	14.619
	108	0.276	15.127
	109	0.201	15.974
	110	0.085	18.726
	111	0.225	14.474
	112	0.962	34.639
	113	0.255	18.282
	114	0.207	14.065
	115	0.407	16.401
	116	0.235	15.83
	117	0.234	16.195
	118	0.238	17.455
	119	0.245	14.798
	120	0.252	16.163
	121	0.428	19.035
	122	0.185	15.339
	123	0.252	89.671
	124	0.208	15.522
	125	0.238	17.296
	126	0.227	15.727
	127	0.496	47.678
	128	0.531	21.226
	129	0.128	15.47
	130	0.19	15.21
	131	0.416	66.673
	132	0.202	16.572
	133	0.262	36.587
	134	0.201	16.685
	135	0.187	14.478
	136	0.241	17.012
	137	0.268	16.271
	138	0.109	122.911
	139	0.205	93.304
	140	0.192	15.001
	141	0.409	30.604
	142	0.257	16
	143	0.226	16.103
	144	0.368	15.069
	145	0.256	16.876
	146	0.225	21.402
	147	0.239	13.798
	148	0.229	14.888
	149	0.195	83.608
	150	0.204	15.579
	151	0.197	17.392
	152	0.302	95.619
	153	0.535	15.72
	154	0.178	16.045
	155	0.473	14.743
	156	0.18	14.201
	157	0.62	16.677
	158	0.214	17.696
	159	0.214	93.644
	160	0.192	20.732
	161	0.637	41.459
	162	0.195	19.134
	163	0.41	64.066
	164	0.269	80.385
	165	0.215	17.112
	166	0.184	16.964
	167	0.215	16.042
	168	0.188	15.226
	1	0.228	90.078
	2	0.359	21.043
	3	0.187	15.457
	4	0.192	15.721
	5	0.339	131.843
	6	0.225	18.59
	7	0.22	21.636
	8	0.202	19.531
	9	0.164	14.561
	10	0.19	15.281
	11	0.197	16.624
	12	0.192	15.583
	13	0.279	121.392
	14	0.192	16.408
	15	0.23	16.883
	16	0.212	16.29
	17	0.421	16.753
	18	0.195	17.012
	19	0.199	17.717
	20	0.341	39.291
	21	0.315	123.152
	22	0.215	17.058
	23	0.204	16.641
	24	0.187	17.434
	25	0.399	16.896
	26	0.173	15.95
	27	0.243	16.405
	28	0.259	16.348
	29	0.193	14.669
	30	0.279	133.749
	31	0.189	17.842
	32	0.208	17.229
	33	0.212	104.288
	34	0.19	17.409
	35	0.215	16.299
	36	0.231	15.826
	37	0.231	17.826
	38	0.221	17.295
	39	0.257	25.447
	40	0.349	19.608
	41	0.264	87.256
	42	0.327	105.419
	43	0.246	63.842
	44	0.277	102.017
	45	0.368	103.839
	46	0.383	20.45
	47	0.378	66.835
	48	0.304	110.01
	49	0.19	42.276
	50	0.273	97.959
	51	0.314	101.217
	52	0.223	14.069
	53	0.169	16.191
	54	0.195	14.414
	55	2.568	43.218
	56	0.354	99.441
	57	0.371	14.618
	58	0.342	75.898
	59	0.176	13.803
	60	0.198	15.325
	61	0.285	69.738
	62	0.242	80.501
	63	0.344	15.189
	64	0.306	88.665
	65	0.404	40.883
	66	0.245	17.243
	67	0.875	16.488
	68	0.193	16.275
	69	0.185	13.952
	70	0.416	61.938
	71	0.308	15.604
	1	0.305	87.089
	2	0.41	17.506
	3	0.254	14.475
	4	0.262	17.418
	5	0.225	14.206
	6	0.235	24.891
	7	0.143	15.786
	8	0.292	71.999
	9	0.383	13.919
	10	0.145	15.635
	11	0.175	15.942
	12	0.359	67.075
	13	0.198	14.77
	14	0.214	13.519
	15	0.343	32.23
	16	0.337	17.824
	17	0.223	14.207
	18	0.285	17.856
	19	0.269	13.58
	20	0.21	17.023
	21	0.21	14.884
	22	0.269	18.241
	23	0.204	17.237
	24	0.277	71.569
	25	0.266	14.373
	26	0.188	20.477
	27	0.218	15.849
	28	0.247	61.221
	29	0.446	17.257
	30	0.325	90.994
	31	0.233	17.838
	32	0.245	17.299
	33	0.206	15.696
	34	0.276	71.678
	35	0.348	16.202
	36	0.243	18.731
	37	0.251	94.047
	38	0.291	94.767
	39	0.263	16.802
	40	0.14	15.715
	41	0.26	62.16
	42	0.222	16.179
	43	0.248	19.783
	44	0.218	15.404
	45	0.206	14.395
	46	0.171	57.63
	47	0.237	16.519
	48	0.336	68.892
	49	0.229	17.432
	50	1.685	15.388
	51	0.167	16.457
	52	0.238	14.377
	53	0.225	17.361
	54	0.215	18.582
	55	0.279	66.786
	56	0.743	15.739
	57	0.23	15.171
	58	0.232	17.134
	59	0.204	14.285
	60	0.238	19.3
	61	0.224	18.791
	62	0.24	15.876
	63	0.236	15.198
	64	0.223	15.712
	65	0.382	75.844
	66	0.228	16.099
	67	0.241	18.08
	68	0.256	14.771
	69	0.262	84.613
	70	0.242	19.567
	71	0.223	16.008
	72	0.238	16.656
	73	0.236	14.596
	74	0.224	21.198
	75	0.342	77.009
	76	0.336	94.468
	77	0.241	17.305
	78	0.321	70.239
	79	0.213	18.204
	80	0.383	72.797
	81	0.224	17.003
	82	0.262	16.893
	83	0.215	15.532
	84	0.221	17.932
	85	0.238	17.147
	86	0.241	17.682
	87	0.236	97.427
	88	0.424	19.91
	89	0.359	47.824
	90	0.256	18.675
	91	0.206	19.748
	92	0.234	15.066
	93	0.251	15.734
	94	0.256	15.193
	95	0.305	19.248
	96	0.249	13.871
	97	0.221	14.345
	98	0.242	17.131
	99	0.262	14.124

## Sheet: PEO1-3dias-F128
Pic		Area	Intensity
528	1	0.215	24.404
	2	0.245	97.266
	3	0.22	15.04
	4	0.422	93.264
	5	0.272	154.906
	6	0.395	15.15
	7	0.334	39.272
	8	0.171	16.457
	9	0.4	94.239
	10	0.278	15.421
	11	0.377	52.196
	12	0.068	73.765
	13	0.237	22.501
	14	0.198	18.45
	15	0.27	17.698
	16	0.363	48.774
	17	0.196	17.514
	18	0.258	17.047
	19	0.3	86.909
	20	0.264	17.934
	21	0.275	71.22
	22	0.263	102.093
	23	0.275	17.224
	24	0.293	90.626
	25	0.252	18.669
	26	0.401	67.24
	27	0.364	45.498
	28	0.39	16.577
	29	0.387	36.999
	30	0.29	22.39
	31	0.406	15.872
	32	0.263	17.512
	33	0.364	48.458
	34	0.606	17.461
	35	0.433	57.313
	36	0.397	35.184
	37	0.387	34.641
	38	0.394	17.226
	39	0.268	17.672
	40	0.387	57.835
	41	0.255	16.535
	42	0.257	17.055
	43	0.329	63.227
	44	0.332	89.932
	45	0.354	100.08
	46	0.271	17.072
	47	0.459	16.817
	48	0.243	16.99
	49	0.382	28.815
	50	0.245	15.961
	51	0.289	98.29
	52	0.47	17.585
	53	0.42	15.22
	54	0.399	70.562
	55	0.209	16.843
	56	0.417	20.751
	57	0.434	53.196
	58	0.256	15.728
	59	0.259	18.85
	60	0.276	67.636
	61	0.264	17.094
	62	0.25	16.411
	63	0.448	60.349
	64	0.291	17.249
	65	0.3	122.153
	66	0.449	32.923
	67	0.228	17.944
	68	0.384	67.197
	69	0.457	131.972
	70	0.225	16.73
	71	0.258	16.575
	72	0.31	88.092
	73	0.455	17.987
	74	0.403	21.028
	75	0.326	109.141
	76	0.227	17.483
	77	0.229	16.038
	78	0.705	85.904
	79	0.295	111.355
	80	0.264	120.808
	81	0.147	36.67
	82	0.224	16.573
	83	0.209	15.216
	84	0.256	17.346
	85	0.251	16.625
	86	0.18	14.817
	87	0.227	16.481
	88	0.064	15.761
	89	0.104	14.836
	1	0.17	14.488
	2	0.364	35.518
	3	0.352	15.254
	4	0.139	15.364
	5	0.257	95.032
	6	0.268	61.009
	7	0.299	82.219
	8	0.232	14.607
	9	0.232	14.509
	10	0.33	76.166
	11	0.323	38.744
	12	0.7	16.348
	13	0.295	62.356
	14	0.395	16.964
	15	0.553	14.899
	16	0.216	99.793
	17	0.473	15.526
	18	0.305	87.178
	19	0.231	47.902
	20	0.197	19.452
	21	0.252	15.596
	22	0.184	15.607
	23	0.647	15.227
	24	1.334	34.224
	25	0.256	15.483
	26	0.184	15.678
	27	0.412	33.041
	28	0.351	26.813
	29	0.297	77.497
	30	0.418	76.589
	31	0.111	15.114
	32	0.195	16.214
	33	0.141	16.041
	34	0.23	86.225
	35	0.311	15.761
	36	0.407	86.585
	37	0.199	16.767
	38	0.216	18.205
	39	0.263	98.177
	40	0.278	88.564
	41	0.4	20.55
	42	0.323	75.021
	43	0.231	140.633
	44	0.415	14.18
	45	0.394	65.258
	46	0.25	110.737
	47	0.27	30.218
	48	0.172	103.524
	49	0.289	100.45
	50	0.284	79.941
	51	0.164	17.405
	52	0.349	97.58
	53	0.05	14.835
	54	0.377	65.499
	55	0.053	15.437
	56	0.276	35.161
	57	0.688	23.878
	58	0.272	16.292
	59	0.192	57.917
	60	0.504	21.477
	61	0.423	23.311
	62	0.38	65.77
	63	0.169	56.521
	64	0.157	15.029
	65	0.392	15.496
	66	0.159	17.213
	67	0.266	93.772
	68	0.394	15.643
	69	0.391	45.792
	70	0.416	31.122
	71	0.358	17.587
	72	0.236	61.587
	73	0.363	18.451
	74	0.371	30.753
	75	0.063	11.811
	76	0.303	73.411
	77	0.743	20.209
	78	0.234	22.849
	79	0.212	15.109
	80	0.253	87.957
	81	0.247	56.333
	82	0.231	98.756
	83	0.115	63.344
	84	0.335	32.312
	85	0.231	16.472
	86	0.441	14.694
	87	0.408	14.487
	88	0.551	14.977
	89	0.244	15.193
	90	0.383	14.688
	91	0.119	12.536
	92	0.233	15.175
	93	0.11	15.698
	94	0.051	12.387
	1	0.342	14.117
	2	0.187	41.957
	3	0.364	44.172
	4	0.688	21.196
	5	0.334	13.734
	6	0.504	28.055
	7	0.279	81.662
	8	0.311	56.152
	9	0.217	15.876
	10	0.387	14.651
	11	0.356	81.293
	12	0.065	15.708
	13	0.577	41.344
	14	0.123	11.912
	15	0.21	43.178
	16	0.549	34.25
	17	0.105	14.686
	18	0.426	13.381
	19	0.301	16.051
	20	0.285	78.779
	21	0.24	96.859
	22	0.372	16.218
	23	0.446	14.04
	24	0.23	74.992
	25	0.367	41.972
	26	0.472	68.013
	27	0.227	147.178
	28	0.172	12.626
	29	0.19	17.853
	30	0.16	16.417
	31	0.327	18.2
	32	0.15	12.898
	33	0.058	11.811
	34	0.212	21.241
	35	0.397	44.149
	36	0.237	17.527
	37	0.216	132.723
	38	0.335	37.174
	39	0.225	103.407
	40	0.621	15.123
	41	0.114	47.79
	42	0.662	17.622
	43	0.231	29.951
	44	0.213	17.388
	45	0.255	17.241
	46	0.203	17.338
	47	0.18	19.697
	48	0.211	133.763
	49	0.34	70.744
	50	0.21	15.305
	51	0.193	17.136
	52	0.183	17.192
	53	0.383	20.908
	54	0.28	95.49
	55	0.125	12.721
	56	0.665	18.56
	57	0.525	17.266
	58	0.216	17.59
	59	0.171	16.138
	60	0.244	41.088
	61	0.319	62.802
	62	0.318	19.232
	63	0.247	16.938
	64	0.082	63.872
	65	0.24	96.852
	66	0.28	16.364
	67	1.262	22.574
	68	0.312	28.068
	69	0.272	94.772
	70	0.189	17.089
	71	0.273	21.335
	72	0.415	70.62
	73	0.368	81.288
	74	0.343	72.097
	75	0.32	68.583
	76	0.128	17.056
	77	0.251	20.769
	78	0.172	19.975
	79	0.316	17.526
	80	0.258	16.53
	81	0.289	91.188
	82	0.249	64.434
	83	0.381	15.855
	84	0.238	77.385
	85	0.17	16.413
	86	0.569	95.957
	87	0.192	16.198
	88	0.362	17.644
	89	0.209	17.361
	90	0.226	77.034
	91	0.27	66.137
	92	0.062	19.273
	93	0.64	16.414
	94	0.216	14.367
	95	0.133	19.146
	96	0.119	33.819
	97	0.491	56.805
	98	0.215	69.204
	99	0.225	112.222
	100	0.594	15.729
	101	0.166	59.851
	102	0.147	51.516
	103	0.172	18.033
	104	0.173	16.706
	105	0.219	40.802
	106	0.259	73.982
	107	0.174	15.034
	108	0.186	15.826
	109	0.182	14.653
	110	0.202	15.336
	1	0.243	13.008
	2	0.449	13.676
	3	0.282	12.851
	4	0.328	13.421
	5	0.315	13.681
	6	0.404	32.934
	7	0.289	13.952
	8	0.307	14.466
	9	0.276	14.399
	10	0.28	14.443
	11	0.231	14.074
	12	0.309	70.182
	13	0.277	14.067
	14	0.461	14.398
	15	0.213	14.469
	16	0.252	14.285
	17	0.303	13.681
	18	0.272	13.187
	19	0.384	20.432
	20	0.346	79.048
	21	0.475	16.887
	22	0.303	13.886
	23	0.273	12.855
	24	0.31	78.198
	25	0.222	14.614
	26	0.256	13.91
	27	0.211	14.692
	28	0.299	14.469
	29	0.258	14.437
	30	0.246	13.864
	31	0.295	14.308
	32	0.676	13.405
	33	0.327	13.1
	34	0.762	14.732
	35	0.294	59.436
	36	0.237	14.302
	37	0.256	14.598
	38	0.37	22.497
	39	0.283	14.527
	40	0.293	13.985
	41	0.293	14.204
	42	0.252	13.886
	43	0.267	12.029
	44	0.306	14.132
	45	0.553	73.606
	46	0.305	13.032
	47	0.298	14.605
	48	0.307	14.064
	49	0.304	59.554
	50	0.297	12.861
	51	0.322	76.767
	52	0.36	76.458
	53	0.306	12.339
	54	0.381	70.584
	55	0.248	12.036
	56	0.331	44.009
	57	0.34	10.515
	1	0.308	78.81
	2	0.335	79.67
	3	0.211	16.029
	4	0.23	91.373
	5	0.241	105.641
	6	0.234	54.855
	7	0.45	18.253
	8	0.33	40.396
	9	0.642	34.315
	10	0.206	89.744
	11	0.231	66.593
	12	0.239	15.764
	13	0.28	18.196
	14	0.31	130.178
	15	0.37	71.352
	16	0.247	109.622
	17	0.214	23.525
	18	0.253	93.03
	19	0.225	15.245
	20	0.426	90.352
	21	0.274	148.237
	22	0.393	15.334
	23	0.355	38.033
	24	0.172	16.422
	25	0.405	90.636
	26	0.276	15.629
	27	0.369	51.354
	28	0.079	71.14
	29	0.235	20.752
	30	0.204	18.066
	31	0.363	46.765
	32	0.27	17.395
	33	0.199	17.059
	34	0.264	16.854
	35	0.309	79.871
	36	0.275	17.396
	37	0.276	67.245
	38	0.268	95.244
	39	0.293	16.862
	40	0.302	82.49
	41	0.261	17.989
	42	0.408	62.883
	43	0.372	42.832
	44	0.387	16.307
	45	0.393	34.549
	46	0.3	21.446
	47	0.399	15.435
	48	0.268	17.027
	49	0.377	45.144
	50	0.622	17.024
	51	0.435	54.138
	52	0.396	33.261
	53	0.386	32.951
	54	0.403	16.673
	55	0.271	16.981
	56	0.392	53.419
	57	0.259	16.078
	58	0.255	16.692
	59	0.314	59.115
	60	0.33	83.424
	61	0.367	89.543
	62	0.271	16.726
	63	0.468	16.359
	64	0.246	16.543
	65	0.386	27.098
	66	0.239	15.168
	67	0.287	91.654
	68	0.474	17.043
	69	0.404	14.529
	70	0.398	65.405
	71	0.211	16.148
	72	0.42	19.726
	73	0.437	49.282
	74	0.252	14.892
	75	0.258	17.976
	76	0.281	62.418
	77	0.264	16.158
	78	0.252	15.84
	79	0.445	55.897
	80	0.302	16.225
	81	0.303	111.788
	82	0.446	30.48
	83	0.227	17.074
	84	0.386	61.3
	85	0.448	122.885
	86	0.235	15.31
	87	0.185	15.361
	88	0.304	81.298

## Sheet: Cutoff 3 dias
PEO4				PEO1
	NT	Fasudil 128			NT	F128
	20.011	20.014			20.142	20.209
	20.237	20.043			20.418	20.432
	20.294	20.077			20.45	20.55
	20.489	20.142			20.477	20.751
	20.491	20.772			20.545	20.752
	20.976	20.945			20.732	20.769
	20.981	21.018			21.043	20.908
	21.023	21.033			21.198	21.028
	21.072	21.965			21.226	21.196
	21.12	22.087			21.402	21.241
	21.173	22.098			21.477	21.335
	21.179	22.324			21.636	21.446
	21.285	23.522			21.737	21.477
	21.509	23.534			22.514	22.39
	21.61	23.546			23.084	22.497
	22.493	23.641			23.218	22.501
	22.532	23.923			23.331	22.574
	22.537	24.595			23.891	22.849
	22.56	24.817			23.986	23.311
	22.703	26.285			24.891	23.525
	22.792	26.381			25.447	23.878
	23.265	26.501			25.6	24.404
	23.349	26.604			28.691	26.813
	24.145	26.694			29.17	27.098
	24.297	26.726			29.295	28.055
	24.335	27.236			29.332	28.068
	24.946	28.084			29.663	28.815
	24.963	29.109			30.123	29.951
	25.214	29.271			30.604	30.218
	25.4	29.706			30.813	30.48
	25.471	29.995			32.224	30.753
	26.073	30.684			32.23	31.122
	27.225	30.951			32.297	32.312
	27.282	31.175			34.639	32.923
	28.174	31.789			36.154	32.934
	29.393	32.171			36.587	32.951
	30.242	33.379			38.637	33.041
	30.383	33.845			39.291	33.261
	31.584	34.706			40.883	33.819
	33.151	34.905			41.459	34.224
	33.497	36.531			42.276	34.25
	33.721	37.078			42.284	34.315
	34.847	37.243			43.218	34.549
	35.025	37.569			44.609	34.641
	35.77	37.997			47.652	35.161
	36.019	38.093			47.678	35.184
	36.212	39.556			47.824	35.518
	39.169	43.321			54.167	36.67
	39.437	43.644			57.55	36.999
	42.037	43.801			57.63	37.174
	43.371	45.689			61.221	38.033
	43.436	45.855			61.607	38.744
	44.556	46.025			61.938	39.272
	45.522	46.651			62.16	40.396
	46.158	46.739			62.907	40.802
	46.332	47.468			63.842	41.088
	46.422	50.501			64.066	41.344
	48.257	54.863			66.673	41.957
	48.558	55.086			66.786	41.972
	48.652	55.098			66.835	42.832
	50.487	56.021			67.075	43.178
	50.766	56.371			67.726	44.009
	51.015	56.7			68.209	44.149
	51.72	57.49			68.892	44.172
	52.394	59.219			69.615	45.144
	52.839	60.18			69.738	45.498
	53.544	61.083			70.239	45.792
	53.704	61.163			70.369	46.765
	53.808	62.088			71.569	47.79
	53.883	62.761			71.678	47.902
	55.305	62.871			71.999	48.458
	56.093	63.103			72.797	48.774
	57.034	63.957			72.924	49.282
	58.952	64.026			75.55	51.354
	59.313	64.296			75.844	51.516
	59.772	64.479			75.898	52.196
	60.985	65.143			77.009	53.196
	61.278	65.7			79.188	53.419
	61.912	65.737			80.211	54.138
	62.485	65.993			80.385	54.855
	63.008	66.122			80.501	55.897
	63.167	66.408			81.306	56.152
	63.449	66.873			83.608	56.333
	63.996	67.068			84.598	56.521
	64.552	67.189			84.613	56.805
	65.2	67.624			84.883	57.313
	65.229	67.834			87.089	57.835
	65.458	68.273			87.256	57.917
	66.11	68.768			87.433	59.115
	66.351	70.62			88.364	59.436
	66.46	70.686			88.665	59.554
	67.057	70.945			89.101	59.851
	67.271	71.036			89.671	60.349
	67.871	71.789			90.078	61.009
	67.872	72.342			90.714	61.3
	69.339	72.871			90.994	61.587
	69.764	73.03			91.742	62.356
	70.355	73.086			93.304	62.418
	70.442	73.264			93.644	62.802
	70.671	73.512			94.047	62.883
	70.966	74.283			94.468	63.227
	71.451	74.482			94.556	63.344
	71.846	74.632			94.767	63.872
	72.242	75.822			95.573	64.434
	72.348	76.076			95.619	65.258
	72.515	77.064			95.998	65.405
	76.457	77.362			96.79	65.499
	76.496	77.92			97.427	65.77
	76.566	77.99			97.951	66.137
	77.843	78.506			97.959	66.593
	78.469	78.563			99.441	67.197
	78.543	78.857			100.735	67.24
	78.927	78.891			101.217	67.245
	79.372	79.48			102.017	67.636
	79.49	79.917			102.895	68.013
	79.517	80.075			103.773	68.583
	79.699	80.55			103.839	69.204
	79.9	80.856			104.288	70.182
	79.958	81.635			105.079	70.562
	80.041	82.04			105.419	70.584
	80.179	82.21			106.312	70.62
	80.219	82.91			110.01	70.744
	80.292	83.326			110.838	71.14
	80.414	84.147			110.867	71.22
	81.331	84.579			111.831	71.352
	81.516	84.624			116.409	72.097
	81.521	84.725			121.392	73.411
	81.876	84.754			122.911	73.606
	82.164	84.836			123.152	73.765
	82.616	85.44			131.282	73.982
	82.664	86.261			131.843	74.992
	83.589	87.072			133.749	75.021
	83.741	87.711				76.166
	84.082	88.603				76.458
	84.272	89.514				76.589
	84.622	89.715				76.767
	85.134	89.889				77.034
	85.541	91.038				77.385
	85.719	94.027				77.497
	85.928	94.18				78.198
	86.28	95.248				78.779
	86.803	97.079				78.81
	86.812	97.696				79.048
	87.018	98.137				79.67
	87.216	100.251				79.871
	89.242	101.712				79.941
	90.209	103.497				81.288
	90.461	108.404				81.293
	91.066	109.809				81.298
	92.12	116.466				81.662
	94.38					82.219
	94.574					82.49
	94.722					83.424
	94.839					85.904
	94.956					86.225
	95.069					86.585
	95.863					86.909
	96.374					87.178
	96.84					87.957
	96.988					88.092
	97.198					88.564
	98.441					89.543
	99.719					89.744
	100.27					89.932
	100.36					90.352
	100.663					90.626
	101.08					90.636
	101.114					91.188
	101.12					91.373
	101.134					91.654
	101.838					93.03
	103.418					93.264
	104.182					93.772
	104.224					94.239
	104.244					94.772
	104.352					95.032
	104.943					95.244
	108.604					95.49
	108.882					95.957
	110.404					96.852
	111.237					96.859
	111.702					97.266
	113.341					97.58
	113.882					98.177
	114.295					98.29
	114.831					98.756
	116.375					99.793
	117.378					100.08
	118.022					100.45
	119.062					102.093
	122.047					103.407
	129.735					103.524
	132.965					105.641
						109.141
						109.622
						110.737
						111.355
						111.788
						112.222
						120.808
						122.153
						122.885
						130.178
						131.972
						132.723
						133.763
						140.633
						147.178
						148.237
						154.906

[truncated: 1 more sheets: Sheet4]
