# Supplementary material for: Inhibitors of Rho kinases (ROCK) induce multiple mitotic defects and synthetic lethality in BRCA2-deficient cells
Source: eLife journal article supplement (doi:10.7554/elife.80254), 2023-04-19
Supplement: supp [file Figure 3- figure supplement 2 data 1.xlsx]

## Sheet: PEO1 Fasudil exp1
PEO1	exp1
Fasudil
	Mononucleated	Binucleated	Multinucleated
	Mean	Mean	Mean
1	1077.26	345.53	355.7
2	362.91	335.53	458.78
3	463.4	360.03	325.19
4	1686.77	316.09	311.61
5	529.76	337.63	338.02
6	285.63	316.23	361.13
7	325.18	317.2	305.7
8	318.83	372.42	420.68
9	315.64	409.89	376.06
10	368.93	325.54	506.23
11	470.05	392.1	386.38
12	360.78	336.4	337.85
13	307.55	315.69	354.54
14	306.28	336.89	331.63
15	307.28	310.69	325.97
16	309.76	329.76	329.85
17	335.88	310.52	320.68
18	335.86	291.73	309.12
19	584.08	310.89	367.76
20	321.28	332.1	346.19
21	325.06	331.27	331.078
22	332.08	350.67	335.485
23	334.17	303.31	327.403
24	319.12	341.53	326.372
25	320.19	338.71	345.465
26	321.23	322.08	467.638
27	324.95	320.86	382.265
28	312.58	310.67	357.098
29	318.03	361.36	468.918
30	319.2	330.71	329.872
31	294.9	403.748	353.172
32	288.02	410.131	335.623
33	306.23	313.874	368.658
34	303.54	301.658	348.593
35	340.76	315.478	346.893
36	324.03	368.316	314.29
37	330.09	316.667	322.994
38	316.36	315.508	362.239
39	316.36	344.082	342.86
40	319.34	315.354	349.31
41	305.67	344.695	339.5
42	334.8	365.451	338.567
43	340.51	295.501	319.943
44	304.13	334.968	493.331
45	316.4	379.862	314.143
46	298.64	370.88	413.81
47	316.54	317.43	455.287
48	295.19	396.651	299.056
49	306.68	354.007	322.731
50	274.25	1164.55	315.878
51	330.74	337.092	398.262
52	321.54	337.037	324.946
53	316.67	343.449	316.692
54	332.69	307.456	310.229
55	335.48	287.333	321.924
56	338.95	298.983	317.928
57	358.33	410.759	355.341
58	354.44	529.662	312.795
59	351.58	678.516	320.678
60	325.69	310.119	341.685
61	378.21
62	312.6
63	389.62
64	324.56
65	340.4
66	358.49
67	374.97
68	351.15
69	330.68
70	323.67
71	386.8
72	540.09
73	358.27
74	339.82
75	335.66
76	346.07
77	343.1
78	352.23
79	332.06
80	314.43
81	348.07

## Sheet: PEO1 NT exp1
PEO1
NT	Mean
1	308.217
2	321.525
3	313.094
4	312.483
5	318.283
6	326.783
7	321.715
8	840.93
9	306.683
10	312.944
11	308.158
12	311.631
13	343.898
14	361.322
15	315.386
16	314.761
17	313.729
18	411.749
19	379.8
20	395.749
21	370.273
22	327.738
23	339.374
24	464.625
25	334.869
26	311.603
27	313.365
28	314.231
29	314.456
30	321.409
31	330.734
32	324.956
33	314.481
34	337.084
35	334.626
36	317.224
37	319.435
38	322.288
39	344.471
40	421.15
41	365.096
42	317.641
43	316.123
44	319.574
45	308.179
46	301.673
47	346.346
48	347.008
49	302.545
50	305.826
51	328.739
52	320.947
53	321.413
54	321.187
55	315.247
56	314.507
57	307.307
58	309.693
59	314.029
60	304.95
61	300.533
62	323.229
63	320.023
64	321.828
65	326.653
66	323.061
67	361.455
68	338.973
69	397.948
70	335.416
71	323.373
72	330.156
73	325.109
74	323.61
75	318.904
1	413.423
2	350.169
3	344.403
4	328.672
5	339.018
6	320.5
7	323.681
8	345.922
9	329.331
10	321.374
11	310.31
12	368.026
13	386.237
14	329.865
15	355.68
16	728.202
17	406.359
18	378.75
19	329.119
20	356.319
21	343.398
22	327.834
23	339.91
24	353.693
25	343.161
26	337.118
27	318.899
28	382.406
29	489.237
30	346.302
31	383.668
32	421.3
33	305.29
34	309.817
35	362.297
36	300.607
37	284.243
38	287.626
39	297.756
40	299.779
41	303.9
42	308.718
43	306.587
44	347.85
45	342.947
46	356.268
47	319.74
48	391.942
49	331.483
50	348.577
51	495.387
52	291.086
53	312.328

## Sheet: PEO1 CDDP exp1
	Mean
1	2370.39
2	317.2
3	297.04
4	330.01
5	326.91
6	311.9
8	382.13
9	374.72
10	665.06
11	320.83
12	425.59
13	321.06
14	382.83
15	350.46
16	345.67
17	318.02
18	359.6
19	304.99
20	326.63
21	347
22	396.03
23	327.36
24	320.55
25	335.29
26	392.41
27	329.14
28	299.8
30	322.08
33	308.29
34	365.77
1	440.88
2	509.42
3	433.7
4	452.64
5	358.15
6	350.37
7	338.87
8	332.54
9	336.45
10	349.63
11	333.16
12	308.79
13	359.32
14	324.89
15	523.24
1	855.16
2	1681.8
3	2630.58
4	462.71
5	1426.61
6	458.35
7	835.33
8	920.86
9	624.23
10	541.51
11	559.27
12	959.17
1	441.93
2	622.76
3	566.81
4	571.85
5	660.55
6	609.87
7	562.35
8	325.45
9	518.74
10	484.24
11	552.35
1	698.52
2	479.07
3	423.63
4	591.7
5	472.59
6	395.45
7	401.81
8	583.85
9	477.48
10	334.77
11	321.26
12	320.97
13	384.82
14	864.98
15	331.56
16	483.92
17	408.64
18	422.56

## Sheet: PEO4 CDDP exp1 
PEO4 CDDP
	Mean
1	373.689
2	315.438
3	482.709
4	349.023
5	729.32
6	411.505
7	334.494
8	300.017
9	468.097
10	409.402
11	364.527
12	429.634
13	344.974
14	447.508
15	383.761
16	283.748
17	291.764
18	280.495
19	269.091
20	466.687
1	285.25
2	298.528
3	440.202
4	321.361
5	331.314
6	301.675
7	303.893
8	355.882
9	357.598
10	351.241
11	323.601
12	359.951
13	355.263
14	285.725
15	481.962
16	312.416
17	334.439
18	464.835
19	483.191
20	321.908
21	343.958
1	320.246
2	300.332
3	291.014
4	295.45
5	307.177
6	367.096
7	302.481
8	292.737
9	330.444
10	323.618
11	351.992
12	413.348
13	302.069
14	335.01
15	326.187
16	357.352
17	295.626
18	328.55
19	351.503
20	335.217
21	329.183
22	325.239
23	319.326
24	295.496
25	301.785
26	414.205
27	471.817
28	471.129
29	480.27
30	480.287
31	319.754
32	409.888
33	319.309

## Sheet: PEO1 Fasudil exp2
PEOs1 Fasudil	yH2AX
Exp2	Mononucleated	Binucleated	Multinucleated
	Mean	Mean	Mean
	305.534	321.453	313.309
	324.913	321.563	360.527
	321.159	327.583	322.944
	771.02	301.925	325.861
	317.013	359.946	377.069
	314.69	312.194	315.359
	302.76	320.612	323.562
	284.979	305.553	346.348
	340.633	326.382	309.037
	447.169	302.017	371.846
	310.319	334.474	327.98
	317.267	313.277	371.191
	410.474	335.766	312.372
	318.038	344.002	308.095
	424.25	321.808	303.286
	300.419	316.392	382.336
	289.567	322.783	314.123
	293.282	335.973	295.212
	323.376	327.206	341.318
	312.277	310.576	305.876
	287.517	315.611	298.202
	409.356	325.759	310.553
	315.42	298.064	311.969
	321.897	312.036	350.562
	305.368	306.198	296.06
	311.598	299.955	307.659
	327.206	317.403	361.096
	310.576	303.312	323.652
	315.611	304.897	298.136
	325.759	342.968	333.734
	298.064	288.167	299.188
	312.036	348.512	313.416
	703.087	330.551	359.35
	320.725	294.035	317.596
	313.642	297.117	312.676
	487.383	302.794	431.825
	341.848	336.509	406.866
	292.665	317.06	317.776
	301.553	291.382	325.829
	312.478	319.122	367.224
	338.318	315.565	307.974
	312.474	406.127	305.332
	964.673	303.266	359.878
	329.644	415.541	380.806
	312.957	302.797	314.713
	288.099	341.314	347.584
	335.329	291.843	333.78
	290.659	304.641	324.005
	340.113	338.865	315.837
	310.076	292.561	345.726
	308.13	317.208	323.549
	295.479	362.23	375.166
	343.559	369.605	327.248
	310.757	325.153	302.026
	291.653	299.561	371.035
	288.25	304.834	280.634
	305.593	387.324	310.105
	289.416	310.778	366.507
	324.961	387.667	462.584
	308.196	540.733	413.963
	332.151	329.11	348.149
	310.394	327.159	424.531
	313.136	317.494
	277.519	399.934
	377.391	369.201
	306.107	384.858
	310.96	313.807
	300.666	374.637
	304.034	541.937
	299.906	348.928
	310.336	344.54
	287.471
	301.47
	297.54
	301.886
	305.59
	304.456
	302.424
	323.916
	518.931
	315.203
	310.285
	486.328
	284.827
	278.931
	321.588
	331.537
	307.141
	309.707
	319.234
	320.013
	312.067

## Sheet: PEO1 NT Exp2
PEO1 NT
Exp2	Mean
1	424.33
2	298.43
3	326.58
4	291.85
5	293.35
6	290.22
7	303.36
8	340.4
9	337.11
10	334.27
11	300.98
12	376.11
13	339.99
14	356.07
15	307.77
16	359.71
17	305.12
18	305.5
19	322.16
20	314.47
21	352.77
22	310.61
23	309.41
24	309.63
25	344.98
26	299.6
27	302.36
28	302.33
29	361
30	303.47
31	347.67
32	305.84
33	306.83
34	314.5
35	311.29
36	351.88
37	304.25
38	304.09
39	303.72
40	304.97
41	317.44
42	327.77
43	306.36
44	369.85
45	303.8
46	296.77
47	325.79
48	335.76
49	307.64
50	319.12
51	310.69
52	340.3
53	300.8
54	313.09
55	297.8
56	339.93
57	301.1
58	298.55
59	298.7
60	301.49
61	293.64
62	318.93
63	327.53
1	326
2	302.67
3	346.43
4	275.51
5	294.35
6	313.23
9	328.55
10	348.69
11	297.89
12	312.96
13	425.42
14	340.04
15	357.85
16	352.45
17	344.49
18	351.53
19	346.88
20	318.36
21	421.03
22	337.68
23	389.78
24	337.57
25	338.27
26	385.75
27	297.41
28	305.43
29	293.12
30	330.57
31	309.63
32	391.07
33	333.07
34	322.75
35	324.6
36	323.52
37	403.46
38	351.1
39	478.32
40	308.73
41	384.86
42	345.08
43	326.61
44	331.49
45	331.5
46	346.5
47	361.07
48	493.76
49	389.03
50	306.68
51	332.2
52	300.6
53	365.91
54	321.14
55	323.85
56	284.46
57	311.25
58	308.9
59	352.47
60	700.77
61	305.65
62	319.63
63	301
64	343.83
65	297.73
66	288.08
67	347.66
68	354.17
69	299
70	303.61

## Sheet: PEO1 CDDP exp2 
PEO1
CDDP exp2
1	416.684
2	313.438
3	329.25
4	356.533
5	320.398
6	452.175
7	409.592
8	321.805
9	332.084
10	331.932
11	316.815
12	314.043
13	324.919
14	322.3
15	338.046
16	334.732
17	326.213
18	336.809
19	499.083
20	500.501
21	364.564
22	440.942
23	325.77
24	323.568
25	326.439
26	346.84
27	313.879
28	316.539
29	344.232
30	429.027
31	320.209
32	319.06
33	392.89
34	345.364
35	367.773
36	351.283
37	354.852
38	470.446
1	448.172
2	498.821
3	554.089
4	774.884
5	938.615
6	491.895
7	544.207
8	723.013
9	598.01
10	487.405
11	484.9
12	492.604
13	456.877
14	519.893
15	464.845
16	616.735
17	446.184
18	568.584
19	540.274
20	509.23
21	1132.68
22	587.767
23	1437.3
24	599.632
25	507.973
1	414.077
2	491.064
3	520.316
4	527.161
5	673.792
6	948.957
7	471.024
8	531.25
9	501.974
10	540.572
11	428.696
12	438.355
13	789.383
14	460.052
15	467.152
16	473.13
17	456.348
18	529.659
19	443.744
20	425.458
21	619.781
22	466.931
23	518.869
24	476.277
25	475.44
26	434.824
27	486.415
28	489.797
29	488.923
30	468.942
31	602.789
32	504.95
33	548.117
34	481.898
35	473.304
36	446.52
37	449.661
38	468.309
39	607.096
40	484.929
41	474.002
42	569.342
43	480.548
44	960.604
45	900.906
46	2416.56
47	456.823
48	1468.46
49	467.904
50	1898.38
51	491.562
52	509.276
53	489.907

## Sheet: PEO4 CDDP exp2
PEO 4
CDDP
1	436.33
2	429.883
3	512.512
4	443.007
5	481.983
6	460.625
7	436.608
8	538.485
9	462.49
10	463.795
11	436.775
12	455.724
13	548.789
14	531.935
15	448.972
16	460.959
17	454.379
18	481.448
19	458.813
20	546.372
21	456.581
22	448.063
23	450.466
24	484.331
25	484.753
26	593.72
1	325.776
2	306.357
3	287.133
4	282.98
5	293.687
6	310.925
7	284.03
8	325.822
9	352.159
10	296.181
11	313.163
12	328.748
13	288.867
14	298.471
15	291.431
16	313.813
17	291.185
18	296.644
19	303.597
20	281.499
21	295.5
22	321.842
23	294.831
24	306.505
25	291.271
26	284.577
27	287.914
28	310.397
29	285.829
30	281.471
31	287.249
32	279.005
33	265.277
34	299.529
35	294.9
36	321.395
37	284.075
38	351.84
39	319.434
40	287.603
41	285.374
42	290.441
43	292.431
43	451.942
44	499.049
45	459.856
46	590.678
47	461.339
48	561.793
49	460.307
50	563.994
52	474.354
53	522.974
54	427.429
55	542.429
56	529.301
57	524.235
1	310.745
2	303.18
3	322.813
4	311.097
5	325.119
6	304.38
7	347.376
8	342.154
9	329.741
10	340.559
11	330.108
12	323.112
13	303.861
14	421.288
15	324.439
