# Supplementary material for: Inhibitors of Rho kinases (ROCK) induce multiple mitotic defects and synthetic lethality in BRCA2-deficient cells
Source: eLife journal article supplement (doi:10.7554/elife.80254), 2023-04-19
Supplement: supp [file Figure 3- figure supplement 2 data 2.xlsx]

## Sheet: BRCA2 Fasudil
HCT116 exp1 yH2AX
	Mononucleated	Binucleated	Multinucleated
	373.62	350.61	410.58
	390.83	402.14	432.21
	391.7	375.78	415.59
	414.08	405.66	455.19
	440.34	419.6	414.72
	418.99	396.15	394.25
	407.35	382.51	396.08
	412.23	397.88	416.8
	452.34	409.99	392.69
	404.53	418.13	383.54
	400.58	389.97	394.15
	418.14	390.47	405.03
	462.23	391.35	411.04
	427.58	406.22	438.07
	404.72	438.08	425.51
	459.57	397.14	407.3
	419.65	433.43	643.29
	413.83	403.87	437.48
	431.57	378.92	367.38
	411.71	419.63	424.25
	460.77	424.39	397.3
	406.98	484.23	393.54
	415.19	377.51	445.99
	405.91	412.51	401.08
	376.5	398.75	429.69
	450.25	424.48	419.18
	429.19	438.14	430.82
	376.7	448.2	456.05
	422.11	502.61	507.71
	414.44	473.23	417.33
	435.16	390.77	479.03
	416.6	413.35	469.91
	386.56	449.37	499.34
	412.4	412.21	394.38
	428.63	387.67	408.73
	399.08	379.36	383.57
	401.67	381.81	406.5
	424.09	388.63	384.02
	426.55	383.73	451.21
	404.96	433.57	407.02
	402.05	422.09	422.54
	447.36	388.73	398.81
	402.48	410.46	368.23
	408.65	422.23	411.46
	354.86	412.43	427.67
	400.67	413.8	411.69
	384.09	368.71	409.4
	403.32	393.13
	413.06	369.24
	391.85	419.28
	427.69	476.69
	394.05	383.37
	378.3	406.8
	390.63	412.14
	390.74	391.64
	401.55	431.18
	383.55
	482
	410.77
	382.64
	390.97
	385.02
	396.36
	407.99
	437.2
	394
	410.25
	419.16
	428.53
	408.37
	406.55
	427.55
	380.31
	390.23
	424.74
	449.66
	394.37
	458.68
	425.38
	433.86
	402.74
	424.32
	407.57
	434.66
	451.82
	392.41
	365.91
	573.2
	422.13
	415.23
	440.47
	496.38
	386.48
	411.26
	433.68
	423.12
	445.3
	393.94
	405.01
	439.2
	431.95
	397.89
	428.27
	417.13
	428.01
	388.86
	394.65
	382.61
	563.62
	460.44
	432.55
	408.6
	459.61
	416.45
	378.03
	427.65
	434.75
	442.15
	403.29
	392.15
	441.58
	409.93
	387.64
	405.36
	471.09
	354.42
	356.26
	366.83
	387.97
	417.19
	446.83
	376.67
	406.22
	418.09
	416.87
	392.88
	436.12
	403.68
	471.9
	404.52
	426.35
	466.5
	372.23
	429.73
	356.75
	431.54
	390.89
	392.84
	409.05
	399.62
	438.51
	416.99
	415.09
	412.23
	429.15
	432.77
	421.09
	433.81
	393.41
	419.35
	388.27
	422.59
	494.66
	391.12
	421.78
	425.56
	419.86
	418.04
	428.18
	436.4
	416.43
	441.59
	431.15
	388.52
	436.94
	411.1
	375.48
	453.19
	406.61
	379.71
	407.44
	400.27
	413.02
	399.29
	389.6
	360.25
	386.12
	379.91
	417.54
	398.79
	411.07
	804.34
	400.51
	401.94
	388.87
	400.15
	407.38
	419.42
	397.29
	442.33
	412.73
	403.78
	378.55
	401.8
	396.79
	400.05
	416.45
	395.68
	397.27
	421.42
	405.52
	440.72
	390.35
	403.77
	419.86
	383.71
	396.47
	390.83
	422.27
	392.49
	371.14
	372.58
	402.53
	416.45
	378.62
	358.14
	359.55
	360.14
	402.51
	344.23
	360.27
	400.54
	396.55
	435.49
	498.9
	427.66
	389.88
	367.05
	408.02
	370.86
	678.76
	399.12
	433.95
	395.81
	468.02
	377.42
	416.01
	399.53
	365.76
	405.78
	387.03
	384.41
	390.77
	376.4
	386.87
	400.11
	393.47
	382.93
	437.69
	656.8
	376.18
	409.93
	407.61
	424.16
	435
	405.28
	426.3
	408.54
	432.94
	410.45
	419.86
	462.24
	416.45
	386.46
	436.5
	384.93
	471.47
	470.66
	463.67
	381.34
	398.53
	456.33
	408.2
	437.16
	406.48
	446.02
	405.7
	428.15
	407.97
	384
	390.61
	397.95
	408.85
	395.64
	402.98
	399.91
	397.72
	397.06
	399.65
	404.19
	415.43
	381.22
	390.28
	495.06
	425.48
	405.11
	387.34

## Sheet: BRCA2 NT
yH2AX
BRCA2 NT
1	407.63
2	413.02
3	402.86
4	607.9
5	409.7
6	454.06
7	424.13
8	399.17
9	361.96
10	399.32
11	477.55
12	406.31
13	418.46
14	413.84
15	362.64
16	500.83
17	502.29
18	456.88
19	387.38
20	389.14
21	401.14
22	394.15
23	383.79
24	377.04
25	402.51
26	399.84
27	463.87
28	396.6
29	510.22
30	458.8
31	514.11
32	386.08
33	423.09
34	411.49
35	397.86
36	426.03
37	455.54
38	376.09
39	418.77
40	435.8
41	417.06
42	405
43	524.8
44	424.58
45	539.04
46	415.3
47	399.83
48	474.98
49	401.42
50	481.58
51	529.15
52	399.18
53	450.25
54	421.76
55	437.2
56	417.6
57	396.48
58	639.73
59	419.31
60	411.45
61	433.88
62	446.57
63	622.49
64	371.91
65	402.64
66	422.73
67	522.81
68	395.31
69	440.96
70	439.84
71	402.35
72	406.05
73	486.6
74	398.83
75	527.58
76	679.24
77	393.91
78	438.8
79	446.92
80	414.62
81	446.72
82	417.19
83	468.97
84	458.68
85	368.31
86	413.84
87	398.51
88	432.09
89	431.9
90	404.23
91	437.7
92	504.12
93	456.91
94	412.56
95	463.24
96	406.98
97	407.93
98	367.16
99	441.23
100	453.68
101	412.55
102	475.82
103	478.32
104	399.99
105	416.59
106	431.6
107	439.54
108	450.01
109	498.69
110	410.77
111	432.1
112	457.41
113	397.54
114	436.66
115	416.85
116	400.91
117	387.21
118	402.59
119	413.87
120	468.75
121	426.17
122	449.66
123	590.9
124	405.56
125	398.48
126	447.34
127	378.5
128	395.41
129	417.47
130	411.39
131	401.62
132	400.88
133	449.27
134	382.24
135	400.46
136	418.72
137	517.7
138	413.11
139	463.32
140	416.82
141	733
142	413.37
143	433.01
144	461.19
145	402.69
146	365
147	445.16
148	428.19
149	440.73
150	378.74
151	431.45
152	418.72
153	408.63
154	412.62
155	450.23
1	356.79
2	381.06
3	367.85
4	365.72
5	384.97
6	415.07
7	484.28
8	332.95
9	372.76
10	374.98
11	391.16
12	384.89
13	397.69
14	441.7
15	415.75
16	351.37
17	399.24
18	392.09
19	410.67
20	410.35
21	405.95
22	379.9
23	464.51
24	375.36
25	355.82
26	425.09
27	385.87
28	383.58
29	373.52
30	391.85
31	432.19
32	405.3
33	371.59
34	463.72
35	365.94
36	593.51
37	389.46
38	399.09
39	385.61
40	387.83
41	373.69
42	422.53
43	404.29
44	427.68
45	408.77
46	366.41
47	381.8
48	415.97
49	392.62
50	414.7
51	365.44
52	363.8
53	399.16
54	411.87
55	408.09
56	408.26
57	398.95
58	399.2
59	382.92
60	681.39
61	444.23
62	419.08
63	397.49
64	381.06
65	403.41
66	433.41
67	390.74
68	368.6
69	379.37
70	425.56
71	403.69
72	504.26
73	387.33
74	425.36
75	408.88
76	407.18
77	402.21
78	378.86
79	393.52
80	393.02
81	364.04
82	398.37
83	388.35
84	382.4
85	377.69
86	391.88
87	461.4
88	423.88
89	414.34
90	389.28
91	384.9
92	403.04
93	392.04
94	511.09
95	426.17
96	380.45
97	496.59
98	455.97
99	421.11
100	477.23
101	403.1
102	420.65
103	393.05
104	382.66
105	392.85
106	476.35
107	517.98
108	430.92
109	412.56
110	371.3
111	364.16
112	380.8
113	407.51
114	426.04
115	409.14
116	409.85
117	465.23
118	363.45
119	431.08
120	421.58
121	424.12
122	478.16
123	393.22
124	404.73
125	379.83
126	374.73
127	416.31
128	363.54
129	414.53
130	371.12
131	346.94
132	427.42
133	399.7
134	405.01
135	376.97
136	354.19
137	358.96
138	343.46
139	423.3
140	384.21
141	362.98
142	386.68
143	355.3
144	400.06
145	382.98
146	390.03
147	358.09
148	383.37
149	412.73
150	398.22
151	394.19
152	662.1
153	358.79
154	375.89
155	363.64
156	367.85
157	357.62
158	370.09
159	387.86
160	387.86
161	369.16

## Sheet: BRCA2 Olaparib
BRCA2 Olaparib
1	349.7
2	367.05
3	360.47
4	420.6
5	530.51
6	366.86
7	391.39
8	405.86
9	383.63
10	376.2
11	425.23
12	379.68
13	421.18
14	435.76
15	390.76
16	402.38
17	460.25
18	481.59
19	398.55
20	480.44
21	374.44
22	538.5
23	461.57
24	409.45
25	421.33
26	460.8
27	490.45
28	418.31
29	384.83
30	442.15
31	372.35
32	427.06
33	407.95
34	377.67
35	447.76
1	461.65
2	724.08
3	377.5
4	392.91
5	617.43
6	462.67
7	485.28
8	423.36
9	511.63
10	437.03
11	456.4
12	412.22
13	344.49
14	384.42
15	387.68
16	869.81
17	384.27
18	419.79
19	390.7
20	392.99
21	377.29
22	437.73
23	446.36
24	385.5
25	487.65
26	411.32
27	558.43
28	434.26
29	403.58
30	426.75
31	380.39
32	382.09
33	456.76
34	384.21
35	424.27
36	402.75
37	390.75
38	549.29
39	555.58
40	413.1
41	460.72
42	529.53
43	456.14
44	489.06
45	374.17
46	594.52
47	381.61
48	382.41
49	440.71
50	379
51	384.68
52	409.69
53	1010.38
54	416.46
55	397.28
56	385.83
57	421.28
58	412.13
59	479.87
60	389.09
61	352.28
62	436.61
63	1055.5
64	365.71
65	568.27
66	522.66
67	470.06
68	1176.53
69	467.43
70	497.63
71	396.59
72	394.08
73	466.73
74	403.57
75	374.62
76	933.37
77	483.6
78	441.15
79	413.39
80	468.68
81	417.48
82	379.05
83	424.1
84	474.02
85	376.73
86	394.58
87	418.26
88	420.99
89	396.85
90	393.27
91	376.61
92	374.52
93	528.74
94	449
95	550.48
96	582.41
97	411
98	419.3
99	380.5
100	427.21
101	390.97
102	413.62
103	438.74
104	385.86
105	432.07
106	430.72
107	442.83
108	520.44
109	378.79
110	380.98
111	423.63
112	385.91
113	375.03
114	423.42
115	424.45
116	415.61
117	750.91
118	395.89
119	412.19
120	395.31
121	382.36
1	405.85
2	452.24
3	703.92
4	467.07
5	458.1
6	369.72
7	397.77
8	455.84
9	594.45
10	472.58
11	387.43
12	378.34
13	551.84
14	568.73
15	418.27
16	484.16
17	381.06
18	475.43
19	515.04
20	515.15
21	460.91
22	470.48
23	1249
24	630.48
25	1022.08
1	495.71
2	736.32
3	767.09
4	545.91
5	488.3
1	471.71
2	747.98
3	482.91
4	405.09
5	432.78
6	487.98
7	486.22
8	567
9	633.8
10	466.99
11	456.59
12	511.85
13	480.22
14	542.81
15	495.47
16	483.26
17	472.86
18	817.64
19	587.76

## Sheet: SCR Olaparib
SCR Olaparib
SCR Olaparib
1	393.77
2	507.45
3	382.55
4	427.61
5	627.59
6	376.87
7	539.31
8	434.76
9	457.78
10	429.51
11	484.71
12	399.14
13	419.29
14	384.97
15	419.65
16	413.24
17	413.38
18	435.71
19	461.76
20	519.03
21	408.4
22	415.69
23	423.74
24	414.07
25	410.95
26	403.5
27	432.56
28	533.01
29	374.44
30	470.75
31	456.41
32	404.64
33	399.16
34	463.34
35	551.06
36	573.03
37	444.99
38	505.92
39	466.71
40	406.27
41	530.57
42	402.95
43	442.1
44	416.78
45	428.06
46	418.83
47	466.64
48	413.56
49	433.44
50	377.16
51	416.4
52	426.39
53	414.87
54	501.99
55	405.56
56	449.96
57	527.35
58	439.98
59	457.14
60	446.91
61	454.36
62	454.36
63	409.17
64	424.86
65	448.67
66	401.08
67	430.92
68	407.55
69	459.72
70	487.17
71	435.78
72	369.49
73	389.99
74	392.59
75	415.1
76	430.27
77	454.18
78	395.69
79	436.42
80	403.05
81	489.26
82	399.31
83	518.55
84	632.12
85	454.17
86	442.22
87	419.34
88	377.68
89	424.84
90	395.91
91	374.86
92	469.98
93	438.34
94	444.71
95	406.38
96	374.54
97	401.45
98	406.4
99	389.43
100	394.55
101	377.02
102	383.81
103	412.28
104	434.25
105	379.65
106	449.51
107	360.43
108	451.16
109	465.4
110	544.92
111	414.97
112	433.63
113	479.69
114	476.35
115	377.06
116	401.1
117	416.31
118	436.46
119	386.65
120	375.54
121	408.57
122	342.5
123	375.89
124	376.43
125	387.89
126	405.69
127	337
128	343.93
129	442.71
130	387.09
131	428.9
132	462.84
133	430.51
134	414.21
135	491.03
136	408.94
137	388.26
138	420.8
139	395.28
140	381.88
141	423.45
142	465.7
143	461.25
144	412.67
145	480.98
146	511.26
147	416.73
148	445.2
149	444.69
150	439.38
151	430.44
152	462.96
153	421
154	507.63
155	422.57
156	422.93
157	440.59
158	419.62
159	455.99
160	379.75
161	440.18
162	451.12
163	420.69
164	496.43
165	387.8
166	436.48
167	382.96
168	414.09
169	603.68
170	395.73
171	491.26
172	432.03
173	516.75
174	443.01
175	388.22
176	442.42
177	388.14
178	421.92
179	411.84
180	408.7
181	452.99
182	514.95
183	399.63
184	474.22
185	411.25
186	557.96
187	413.26
188	407.74
189	398.97
190	436.87
191	457.85
192	415.62
193	436.28
194	480.43
195	425.89
196	448.54
197	494.79
198	409.58
199	434.55
200	514.86
201	425.54
202	438.14
203	372.79
204	484.65
205	431.31
206	405.61
207	403.66
208	440.86
209	379.62
210	461.07
211	417.75
212	382.35
213	383.53
214	408.63
215	513.2
216	427.01
217	398.81
218	453.06
219	486.53
220	412.4
221	414.39
222	425.33
223	373.95
224	406.68
225	475.76
226	413.4
227	430.28
228	438.59
229	416.74
230	403.36
231	452.25
232	442.36
233	420.65
234	396.75
235	395.8
236	390.6
237	408.47
238	421.43
239	493.28
240	430.34
241	389.95
242	330.6
243	400.11
244	388.16
245	392

## Sheet: BRCA2 Fasudil exp 2
BRCA2 Fasudil
Mononucleated	Binucleated	Multinucleated
Mean	Mean	Mean
564.7	584.44	382.55
624.55	667.21	374.44
654.26	574.2	369.49
676.23	530.83	537.75
674.65	547.29	502.97
735.18	536.29	684.23
565.35	506.86	600.4
824.02	531.76	559.97
591.08	533.3	571.37
593.46	566.98	481.19
568.69	534.46	786.05
566.77	529.9	712.13
549.03	547.39	566.62
539.04	520.6	593.82
528.36	553.14	681.47
527.97	516.9	714.98
540.62	514.77	534.21
567.22	525.96	564.15
557.48	550.19	664.02
564.48	504.95	546.37
577.05	585.23	529.37
558.74	571.23	738.81
490.39	537.06	587.66
523.46	546.29	532.61
769.38	518.67	520.85
511.09	604.66	470.77
525.09	576.2	599.12
507.13	630.28	683.39
632.76	562.2	670.51
553.62	557.81	604.82
494.09	551.51	628.52
530.3	996.78	531.05
529.54	542.65	561.53
510.76	577.58	786.96
519.7	692.31	332.87
510.46	552.2	310.03
521.87	547.61	565.89
521.85	554.23	541.99
548.56	634.42	750.48
506.12	552.96	550.83
568.35	521.29	539.02
615.4	550.98	544.47
545.4	586.94	548.72
535.12	557.58	530.95
533.97	521.96	563.94
526.04	510.31	537.51
527.46	533.76	543.92
522.22	627.81	552.52
526.14		531.11
563.15		571.33
583.46		498.46
534.94		511.91
468.44
553.34
485.44
510.17
648.98
508.39
496.91
480.86
539.71
515.38
582.48
550.69
546.12
514.09
596.69
603.59
516.25
548.24
499.25
562.11
515.55
514.35
603.82
503.29
516.14
590.51
520.37
540.05
552.56
505.61
537.3
518.03
506.74
969.85
619.9
542.39
580.24
534.62
537.07
1069.45
584.29
615.77
583.28
779.47
527.68
640.55
566.91
558.05
622.75
512.9
545.87
626.75
615.16
793.53
600.62
606.75
573.33
575.18
652.36
587
637.2
580.82
690.37
573.77
530.44
548.98
645.6
653.84
616.38
551.16
553.27
525.21
549.32
527.13
562.89
558.84
610.48
537.57
550.18
554.59
566.55
853.95
546.74
554.81
541.44
488.86
533.05
506.48
514.03
536.52
871.91
531.99
544.85
565.83
612.31
553.58
697.29
555.84
590.48
559.58
578.75
694.65
606.56
583.48
569.06
593.73
624.57
631.18
598.61
606.24
572.5
596.84
627.62
660.38
630.95
646.5
573.46
673.28
609.41
595.23
565.95
540.79
588.85
593.63
600.8
577.41
586.34
675.6
743.13
716.49
628.03
648.24
593.45
540.96
572.42
560.95
561.68
545.74
559.85
561.33
562
559.88
553.77
556.48
573.28
584.68
562.95
522.79
588.91
594.63
595.14
534.56
537.92
515.5
510.34
519.11
574.72
575.22
566.48
600.02
600.17
573.65
672.11
603.54
508.8
514.3
523.13
618.79
571.08
566.62
619.83
630.68
579.79
559.28
543.38
607.59
742.46
565.98
547.92
534.44
520.81
588.04
563.63
534.08
532.38
722.82
744.34
613.16
613.65
724.65
645.68
644.43
774.87
658.86
643.2
653.33
625.78
645.03
648.34
683.26
642.74
600.28
655.14
637.44
681.6
637.53
653.26
722.97
659.32
600.53
636.32
658.68
651.41
654.56
637.98
627.48
645.85
634.75
649.36
678.29
629.87
643.14
614.32
707.22
692.17
635.54
657.58
653.36
624.64
631.48
676.65
660.69
634.09
633.77
635.14
649.25
624.93
641.52
633.87
634.39
602.77
598.18
550.99
575.45
558.75
583.73
662.09
643.98
634.44
632.53
711.16

## Sheet: BRCA2 NT exp 2
BRCA2
NT	Mean
1	512.75
2	525.37
3	560.69
4	517.68
5	546.5
6	864.84
7	575.56
8	515.6
9	675.74
10	541.75
11	626.29
12	567.4
13	536.88
14	571.71
15	552.2
16	531.41
17	600.62
18	648.3
19	579.9
20	559.29
21	615.75
22	592.48
23	672.04
24	511.53
25	534.79
26	539.28
27	558.57
28	534.37
29	553.63
30	562.31
31	553.88
32	572.5
33	546.04
34	545.07
35	558.2
36	607.89
37	681.43
38	576.94
39	579.77
40	537.63
41	592.16
42	552.14
43	588.56
44	507.11
45	532.36
46	615.53
47	538.07
48	564.11
49	540.02
50	580.7
51	634.96
52	558.27
53	573.44
54	546.37
55	555.54
56	561.47
57	570.52
58	600.77
59	533.65
60	635.58
61	582.71
62	575.02
63	574.42
64	523.71
65	570.9
66	541.35
67	648.19
68	581.17
69	620.08
70	573.2
71	588.45
72	625.59
73	573.8
74	608.87
75	590.89
76	610.62
77	566.91
78	556.97
79	576.89
80	519.58
81	541.09
82	478.14
83	513.93
84	529.97
85	549.08
86	581.95
87	501.86
88	563.09
89	486.72
90	555.9
91	494.89
92	574.61
93	541.06
94	547.01
95	569.79
96	555.52
97	507.13
98	506.32
99	569.72
100	610.4
101	595.52
102	625.2
103	559.1
104	522.96
105	603.64
106	653.39
107	515.19
108	563.81
109	544.41
110	589.92
111	595.73
112	623
113	685.98
114	576.45
115	590.66
116	583.69
117	584.43
118	569.35
119	538.29
120	508.25
121	734.52
122	528.2
123	908.95
124	544.51
125	543.48
126	577.27
127	529.28
128	604.84
129	580.65
130	529.17
131	573.09
132	623.96
133	662.14
134	528.87
135	633.16
136	546.78
137	883.07
138	633.97
139	528.11
140	571.54
141	542.66
142	543.55
143	585.27
144	526.57
145	580.97
146	581.04
147	584.4
148	544.57
149	567.87
150	576.09
151	521.75
152	534.83
153	493.5
154	518.47
155	563.96
156	535.88
157	638.74
158	553.62
159	572.44
160	647.61
161	532.25
162	508.43
163	508
164	545.09
165	514.27
166	517.07
167	541.15
168	505.3
169	476.89
170	528.02
171	548.35
172	574.06
173	528.11
174	613.99
175	511.44
176	527.3
177	612.61
178	530.2
179	530.92
180	554.85
181	630.99
182	525.63
183	501.2
184	501.92
185	526.3
186	575.33
187	519.34
188	537.81
189	529.1
190	480.94
191	538.06
192	526.9
193	514.13
194	658.12
195	548.76
196	524.62
197	539.88
198	538.14
199	678.21
200	511.26
201	522.55
202	536.06
203	601.04
204	507.19
205	525.29
206	514.93
207	555.08
208	512.4
209	649.04
210	517.64
211	514.85
212	478.31
213	716.7
214	514.9

## Sheet: BRCA2 Olaparib exp 2
BRCA2	Mean
Olaparib	664.62
exp2	1095.78
	584.44
	592.81
	649.13
	570.93
	717.93
	643.79
	581.24
	627.55
	763.21
	678.72
	704.14
	691.82
	696.92
	681.62
	1048.49
	1245.95
	737.21
	749.12
	737.37
	801.16
	657.66
	687.24
	610.25
	982.15
	1184.16
	703.95
	685.99
	704.53
	765.62
	666.88
	763.33
	636.49
	621.21
	825.08
	689.18
	736.42
	599.22
	686.73
	585.2
	621.77
	558.9
	628.55
	657.22
	675.64
	695.25
	856.86
	954.57
	1834.72
	992.39
	576.71
	587
	559.53
	538.5
	559.5
	992.9
	2723.06
	558.99
	772.89
	628.23
	1345.99
	639.51
	652.2
	892.6
	674.46
	1168.13
	566.71
	708.23
	554.87
	567.19
	539.29
	546.62
	609.53
	559.88
	714.22
	746.39
	621.59
	688.26
	660.94
	580.36
	608.45
	596.61
	609.65
	796.5
	644.51
	634.95
	668.2
	592.16
	716.43
	625.16
	1147.48
	589.77
	656.17
	613.01
	616.96
	1269.13
	595.33
	741.24
