# Supplementary material for: Inhibitors of Rho kinases (ROCK) induce multiple mitotic defects and synthetic lethality in BRCA2-deficient cells
Source: eLife journal article supplement (doi:10.7554/elife.80254), 2023-04-19
Supplement: supp [file Figure 3- figure supplement 2 data 4.xlsx]

## Sheet: PEO1 Fasudil exp1+2
PEO 53BP1 foci
	Area	Mean	Min	Max	IntDen	RawIntden	Foci of 53BP1	Nuclei	Foci 53BP1/nuclei
1	55.145	0.391	0	255	21.535	255	1		1
2	90.107	0	0	0	0	0	0		0
3	111.135	0	0	0	0	0	0		0
4	52.612	0	0	0	0	0	0		0
5	85.547	0.252	0	255	21.535	255	1		1
6	113.5	0	0	0	0	0	0		0
7	92.387	0	0	0	0	0	0		0
8	69.502	0	0	0	0	0	0		0
9	80.311	0.536	0	255	43.069	510	2		2
10	431.197	0.799	0	255	344.553	4080	16	8	16	2
11	106.49	0.202	0	255	21.535	255	1		1
12	84.534	0	0	0	0	0	0		0
13	64.266	0.335	0	255	21.535	255	1		1
14	37.918	0.568	0	255	21.535	255	1		1
15	87.405	0.739	0	255	64.604	765	3		3
16	51.176	0	0	0	0	0	0		0
17	111.051	0.582	0	255	64.604	765	3		3
18	98.13	0.658	0	255	64.604	765	3		3
19	71.782	0	0	0	0	0	0		0
20	66.968	0.965	0	255	64.604	765	3		3
21	125.829	0.342	0	255	43.069	510	2		2
22	75.582	0.855	0	255	64.604	765	3		3
23	157.92	0.273	0	255	43.069	510	2		2
24	108.517	0.397	0	255	43.069	510	2		2
25	93.992	0.687	0	255	64.604	765	3		3
26	79.044	0	0	0	0	0	0		0
27	71.613	0.301	0	255	21.535	255	1		1
28	319.049	0.135	0	255	43.069	510	2	2	2	1
29	204.367	0.105	0	255	21.535	255	1	2	1	0.5
30	74.906	0	0	0	0	0	0		0
31	76.933	0.28	0	255	21.535	255	1		1
32	83.014	0.519	0	255	43.069	510	2		2
33	69.755	0	0	0	0	0	0		0
34	91.881	0	0	0	0	0	0		0
35	65.786	0	0	0	0	0	0		0
36	121.607	0.885	0	255	107.673	1275	5		5
37	70.177	0.307	0	255	21.535	255	1		1
38	93.992	0.229	0	255	21.535	255	1		1
39	1.351	0	0	0	0	0	0		0
40	107.166	0.402	0	255	43.069	510	2		2
41	45.687	0	0	0	0	0	0		0
42	125.491	0	0	0	0	0	0		0
43	118.229	0.182	0	255	21.535	255	1		1
44	491.832	0.044	0	255	21.535	255	1	5	1	0.2
45	153.022	0.141	0	255	21.535	255	1		1
46	491.072	0.351	0	255	172.276	2040	8	8	8	1
47	176.076	0.122	0	255	21.535	255	1		1
48	116.793	0.553	0	255	64.604	765	3		3
49	106.49	0.404	0	255	43.069	510	2		2
50	35.891	0.6	0	255	21.535	255	1		1
51	88.587	1.215	0	255	107.673	1275	5		5
52	233.755	0.184	0	255	43.069	510	2		2
53	100.241	0.43	0	255	43.069	510	2		2
54	35.638	0	0	0	0	0	0		0
55	135.71	0.317	0	255	43.069	510	2		2
56	79.213	0.544	0	255	43.069	510	2		2
57	130.136	0.496	0	255	64.604	765	3		3
58	54.807	0	0	0	0	0	0		0
59	120.593	0.179	0	255	21.535	255	1		1
60	210.616	0	0	0	0	0	0		0
61	121.269	0.178	0	255	21.535	255	1		1
62	115.611	0	0	0	0	0	0		0
63	375.714	0.115	0	255	43.069	510	2	2	2	1
64	105.73	0	0	0	0	0	0		0
65	140.27	0.154	0	255	21.535	255	1		1
66	93.823	0	0	0	0	0	0		0
67	81.916	0.263	0	255	21.535	255	1		1
68	119.411	0.18	0	255	21.535	255	1		1
69	134.19	0.321	0	255	43.069	510	2		2
70	78.2	0.275	0	255	21.535	255	1		1
71	86.138	0.25	0	255	21.535	255	1		1
72	73.217	0.882	0	255	64.604	765	3		3
73	97.117	0.222	0	255	21.535	255	1		1
74	128.447	0.168	0	255	21.535	255	1		1
1	79.382	0.271	0	255	21.535	255	1		1
2	84.534	0.255	0	255	21.535	255	1		1
3	92.303	0.467	0	255	43.069	510	2		2
4	98.468	0.219	0	255	21.535	255	1		1
5	89.009	0.726	0	255	64.604	765	3		3
6	169.405	0.381	0	255	64.604	765	3		3
7	79.382	0.271	0	255	21.535	255	1		1
8	250.73	0.429	0	255	107.673	1275	5	2	5	2.5
9	75.244	0.572	0	255	43.069	510	2		2
10	95.934	0.449	0	255	43.069	510	2		2
11	74.653	0.288	0	255	21.535	255	1		1
12	94.921	0.454	0	255	43.069	510	2		2
13	103.197	0.835	0	255	86.138	1020	4		4
14	86.223	0.749	0	255	64.604	765	3		3
15	60.888	0.707	0	255	43.069	510	2		2
16	87.32	0.247	0	255	21.535	255	1		1
17	67.728	0.318	0	255	21.535	255	1		1
18	120.171	0.179	0	255	21.535	255	1		1
19	67.897	0.634	0	255	43.069	510	2		2
20	72.373	0.298	0	255	21.535	255	1		1
21	66.461	0.324	0	255	21.535	255	1		1
22	75.498	0.57	0	255	43.069	510	2		2
23	66.715	0.323	0	255	21.535	255	1		1
24	136.977	0.314	0	255	43.069	510	2		2
25	47.714	1.354	0	255	64.604	765	3		3
26	86.898	0.248	0	255	21.535	255	1		1
27	68.995	0.312	0	255	21.535	255	1		1
28	133.261	0.485	0	255	64.604	765	3	2	3	1.5
29	84.365	0.255	0	255	21.535	255	1		1
30	78.538	0.823	0	255	64.604	765	3		3
31	46.447	0.464	0	255	21.535	255	1		1
32	87.152	0.988	0	255	86.138	1020	4		4
33	88.165	0	0	0	0	0	0		0
34	84.111	0	0	0	0	0	0		0
35	78.876	0.546	0	255	43.069	510	2		2
36	139.088	0.155	0	255	21.535	255	1		1
37	92.387	0.466	0	255	43.069	510	2		2
38	53.71	0.802	0	255	43.069	510	2		2
39	99.481	0	0	0	0	0	0		0
40	55.99	0	0	0	0	0	0		0
41	129.798	0.332	0	255	43.069	510	2	2	2	1
42	105.73	1.222	0	255	129.207	1530	6		6
43	103.197	0.835	0	255	86.138	1020	4		4
44	116.878	0.184	0	255	21.535	255	1		1
45	65.955	0.653	0	255	43.069	510	2		2
46	88.756	0.243	0	255	21.535	255	1		1
47	108.095	0.398	0	255	43.069	510	2		2
48	84.28	0.511	0	255	43.069	510	2		2
49	323.525	0.532	0	255	172.276	2040	8	4	8	2
50	97.201	0.222	0	255	21.535	255	1		1
51	81.325	1.059	0	255	86.138	1020	4		4
52	65.364	0.329	0	255	21.535	255	1		1
53	90.529	0.476	0	255	43.069	510	2		2
54	97.37	0.221	0	255	21.535	255	1		1
55	152.008	0.283	0	255	43.069	510	2	2	2	1
56	109.615	0.589	0	255	64.604	765	3		3
57	109.953	0.588	0	255	64.604	765	3		3
58	85.631	0.251	0	255	21.535	255	1		1
59	209.518	0.308	0	255	64.604	765	3		3
60	92.218	0.701	0	255	64.604	765	3		3
61	368.789	0.175	0	255	64.604	765	3	3	3	1
62	98.806	0.436	0	255	43.069	510	2		2
63	65.87	0.327	0	255	21.535	255	1		1
64	63.252	0.34	0	255	21.535	255	1		1
65	53.879	0.4	0	255	21.535	255	1		1
66	66.293	0.325	0	255	21.535	255	1		1
67	1.098	19.615	0	255	21.535	255	1		1
68	58.101	0.371	0	255	21.535	255	1		1
69	117.047	0.184	0	255	21.535	255	1		1
70	79.382	0.271	0	255	21.535	255	1		1
71	63.928	0.337	0	255	21.535	255	1		1
72	74.822	0.576	0	255	43.069	510	2		2
73	84.534	0.255	0	255	21.535	255	1		1
74	64.181	1.007	0	255	64.604	765	3		3
75	75.835	0.284	0	255	21.535	255	1		1
76	108.517	0.794	0	255	86.138	1020	4		4
77	95.259	0.226	0	255	21.535	255	1		1
78	94.245	0.457	0	255	43.069	510	2		2
79	97.285	0.221	0	255	21.535	255	1		1
80	52.274	0.412	0	255	21.535	255	1		1
81	70.008	0.308	0	255	21.535	255	1		1
82	69.248	0.311	0	255	21.535	255	1		1
83	66.293	0.325	0	255	21.535	255	1		1
1	269.308	0	0	0	0	0	0		0
2	212.559	0.203	0	255	43.069	510	2		2
3	103.366	0.208	0	255	21.535	255	1		1
4	92.979	0	0	0	0	0	0		0
5	139.341	0.155	0	255	21.535	255	1		1
6	105.984	0.203	0	255	21.535	255	1		1
7	184.859	0.233	0	255	43.069	510	2		2
8	135.71	0.159	0	255	21.535	255	1		1
9	210.532	0	0	0	0	0	0		0
10	234.177	0.184	0	255	43.069	510	2		2
11	303.341	0.071	0	255	21.535	255	1	3	1	0.333333
12	182.157	0.118	0	255	21.535	255	1		1
13	89.263	0.482	0	255	43.069	510	2		2
14	64.35	0	0	0	0	0	0		0
15	27.615	0	0	0	0	0	0		0
16	352.068	0.061	0	255	21.535	255	1		1
17	155.64	0	0	0	0	0	0		0
18	283.918	0.076	0	255	21.535	255	1	2	1	0.5
19	57.51	0	0	0	0	0	0		0
20	641.476	0.168	0	255	107.673	1275	5		5
21	65.786	0	0	0	0	0	0		0
22	75.666	0	0	0	0	0	0		0
23	4.729	0	0	0	0	0	0		0
24	188.575	0	0	0	0	0	0		0
25	160.453	0	0	0	0	0	0		0
1	169.574	0.127	0	255	21.535	255	1		1
2	118.736	0	0	0	0	0	0		0
3	145.253	0	0	0	0	0	0		0
4	339.908	0	0	0	0	0	0	2	0	0
5	569.103	0	0	0	0	0	0		0
6	358.064	0.06	0	255	21.535	255	1	2	1	0.5
7	172.867	0.125	0	255	21.535	255	1		1
8	191.531	0	0	0	0	0	0		0
9	231.475	0.093	0	255	21.535	255	1		1
10	164.338	0.131	0	255	21.535	255	1		1
11	220.243	0.098	0	255	21.535	255	1		1
12	214.585	0.1	0	255	21.535	255	1		1
13	180.299	0.239	0	255	43.069	510	2		2
14	226.239	0.19	0	255	43.069	510	2		2
15	293.292	0.073	0	255	21.535	255	1		1
16	187.73	0.229	0	255	43.069	510	2		2
17	171.77	0.125	0	255	21.535	255	1		1
18	139.594	0.154	0	255	21.535	255	1		1
19	267.028	0.081	0	255	21.535	255	1		1
20	191.531	0.112	0	255	21.535	255	1		1
21	187.562	0	0	0	0	0	0		0
22	153.529	0.14	0	255	21.535	255	1		1
23	187.393	0	0	0	0	0	0		0
24	517.673	0	0	0	0	0	0	2	0	0
25	204.451	0.105	0	255	21.535	255	1		1
26	264.664	0.081	0	255	21.535	255	1		1
27	207.576	0.104	0	255	21.535	255	1		1
28	166.534	0	0	0	0	0	0		0
29	144.324	0.149	0	255	21.535	255	1	deje en 4	1
1	496.308	0	0	0	0	0	0		0
2	627.626	0.034	0	255	21.535	255	1	2	1	0.5
3	186.548	0.115	0	255	21.535	255	1		1
4	212.643	0.101	0	255	21.535	255	1		1
5	425.033	0	0	0	0	0	0	2	0	0
6	220.497	0.098	0	255	21.535	255	1		1
7	324.2	0	0	0	0	0	0		0
8	202.34	0.106	0	255	21.535	255	1		1
9	215.008	0.1	0	255	21.535	255	1		1
10	1019.72	0	0	0	0	0	0	4	0	0
1	193.135	0	0	0	0	0	0		0
2	213.741	0.302	0	255	64.604	765	3		3
3	368.958	0.058	0	255	21.535	255	1	2	1	0.5
4	159.271	0.135	0	255	21.535	255	1		1
5	369.972	0.058	0	255	21.535	255	1	2	1	0.5
6	604.994	0.071	0	255	43.069	510	2		2
7	420.472	0.051	0	255	21.535	255	1	2	1	0.5
8	864.59	0.149	0	255	129.207	1530	6	6	6	1
9	73.893	0.291	0	255	21.535	255	1		1
10	403.498	0.267	0	255	107.673	1275	5	2	5	2.5
11	83.774	0.257	0	255	21.535	255	1		1
12	131.741	0.327	0	255	43.069	510	2		2
13	137.23	0.471	0	255	64.604	765	3		3
14	136.977	0.472	0	255	64.604	765	3		3
1	281.976	0	0	0	0	0	0		0
2	193.051	0	0	0	0	0	0		0
3	309.591	0.07	0	255	21.535	255	1		1
4	87.236	0	0	0	0	0	0		0
5	719.169	0.06	0	255	43.069	510	2	6	2	0.333333
6	613.692	0.07	0	255	43.069	510	2	4	2	0.5
7	263.312	0	0	0	0	0	0		0
8	148.715	0.145	0	255	21.535	255	1		1
9	676.269	0.096	0	255	64.604	765	3	3	3	1
10	153.782	0	0	0	0	0	0		0
11	120.678	0.178	0	255	21.535	255	1		1
12	271.42	0.079	0	255	21.535	255	1		1
13	190.348	0	0	0	0	0	0		0
14	170.503	0.126	0	255	21.535	255	1		1
15	193.895	0.111	0	255	21.535	255	1		1
16	147.364	0	0	0	0	0	0		0
17	644.178	0.033	0	255	21.535	255	1	2	1	0.5
18	795.849	0.568	0	255	452.225	5355	21	4	21	5.25
19	114.851	0.375	0	255	43.069	510	2		2
20	956.387	0.023	0	255	21.535	255	1	2	1	0.5
1	140.777	0	0	0	0	0	0		0
2	239.076	0	0	0	0	0	0		0
3	226.07	0.095	0	255	21.535	255	1		1
4	149.222	0	0	0	0	0	0		0
5	108.179	0.199	0	255	21.535	255	1		1
6	258.921	0	0	0	0	0	0		0
7	121.185	0.178	0	255	21.535	255	1		1
8	282.06	0.687	0	255	193.811	2295	9		9
9	168.983	0	0	0	0	0	0		0
10	222.608	0	0	0	0	0	0		0
11	180.046	0	0	0	0	0	0		0
12	676.522	0.032	0	255	21.535	255	1	2	1	0.5
13	224.888	0	0	0	0	0	0		0
14	227.675	0.095	0	255	21.535	255	1		1
15	196.851	0	0	0	0	0	0	2	0	0
16	249.125	0	0	0	0	0	0		0
17	560.151	0	0	0	0	0	0	3	0	0
18	305.79	0	0	0	0	0	0	2	0	0
19	103.872	0	0	0	0	0	0		0
20	273.7	0	0	0	0	0	0	20	0	0
1	214.416	0	0	0	0	0	0		0
2	692.905	0	0	0	0	0	0	4	0	0
3	335.601	0.064	0	255	21.535	255	1		1
4	1082.13	0	0	0	0	0	0		0
5	746.699	0.029	0	255	21.535	255	1	4	1	0.25
6	322.173	0	0	0	0	0	0	2	0	0
7	229.448	0.094	0	255	21.535	255	1		1
8	429.171	0	0	0	0	0	0	2	0	0
9	232.066	0.093	0	255	21.535	255	1		1
1	718.49	0.03	0	255	21.53	255	1	3	1	0.333333
2	526.62	0.12	0	255	64.6	765	3		3
3	85.8	0	0	0	0	0	0		0
4	297.18	0.51	0	255	150.74	1785	7		7
5	930.8	0.12	0	255	107.67	1275	5		5
1	541.32	0	0	0	0	0	0	2	0	0
2	329.27	0	0	0	0	0	0		0
3	231.64	0	0	0	0	0	0		0
4	494.87	0.04	0	255	21.53	255	1	2	1	0.5
5	226.15	0	0	0	0	0	0		0
6	200.82	0.11	0	255	21.53	255	1		1
7	405.52	0.05	0	255	21.53	255	1		1
8	335.52	0.13	0	255	43.07	510	2	2	2	1
9	226.66	0.1	0	255	21.53	255	1		1
10	203.18	0.64	0	255	129.21	1530	6		6
11	369.89	0.99	0	255	366.09	4335	17		17
12	212.22	0	0	0	0	0	0	2	0	0
13	475.96	0.18	0	255	86.14	1020	4	2	4	2
14	406.37	0	0	0	0	0	0		0	0
15	168.81	0	0	0	0	0	0		0
16	191.36	0.11	0	255	21.53	255	1		1
17	288.56	0.07	0	255	21.53	255	1		1
18	599.17	0.29	0	255	172.28	2040	8	4	8	2
19	380.02	0.06	0	255	21.53	255	1	2	1	0.5
20	246.25	0	0	0	0	0	0		0
21	287.38	0	0	0	0	0	0	3	0	0
1	432.63	0.2	0	255	86.14	1020	4	2	4
2	246	0	0	0	0	0	0	2	0
3	446.06	0.19	0	255	86.14	1020	4	3	4	1.33333
4	283.24	0	0	0	0	0	0	2	0	0
5	249.21	0	0	0	0	0	0		0
6	90.61	0	0	0	0	0	0		0
7	456.53	0	0	0	0	0	0		0
8	396.07	0.05	0	255	21.53	255	1	2	1	0.5
9	80.14	0	0	0	0	0	0		0
10	266.27	0.08	0	255	21.53	255	1		1
11	80.56	0.27	0	255	21.53	255	1		1
12	145.08	0.15	0	255	21.53	255	1		1
13	304.52	0	0	0	0	0	0		0
14	152.94	0	0	0	0	0	0		0
15	118.4	0	0	0	0	0	0		0
16	56.67	0	0	0	0	0	0		0
17	16.47	0	0	0	0	0	0		0
1	222.44	0.1	0	255	21.53	255	1		1
2	208.17	0.1	0	255	21.53	255	1		1
3	382.89	0.11	0	255	43.07	510	2	2	2	1
4	638.94	0	0	0	0	0	0	2	0	0
5	121.52	0	0	0	0	0	0		0
6	150.24	0	0	0	0	0	0		0
7	450.96	0.1	0	255	43.07	510	2	2	2	1
8	522.82	0	0	0	0	0	0	2	0	0
9	249.46	0.35	0	255	86.14	1020	4		4
10	236.2	0.09	0	255	21.53	255	1		1
11	202.51	0	0	0	0	0	0		0
12	205.72	0.1	0	255	21.53	255	1		1
13	186.04	0	0	0	0	0	0		0
14	351.82	0	0	0	0	0	0	2	0	0
15	161.47	0.13	0	255	21.53	255	1		1
16	147.03	0	0	0	0	0	0		0
17	286.11	0.08	0	255	21.53	255	1		1
18	161.97	0.13	0	255	21.53	255	1		1
19	191.62	0	0	0	0	0	0		0
20	70.43	0	0	0	0	0	0		0
21	346.07	0.06	0	255	21.53	255	1	2	1	0.5
22	222.27	0.1	0	255	21.53	255	1		1
1	186.63	0.35	0	255	64.6	765	3		3
2	238.99	0.36	0	255	86.14	1020	4		4
3	562.6	0.38	0	255	215.35	2550	10	2	10	5
4	215.68	0.1	0	255	21.53	255	1		1
5	167.21	0	0	0	0	0	0		0
6	247.77	0.09	0	255	21.53	255	1		1
7	164	0	0	0	0	0	0		0
8	175.65	0	0	0	0	0	0		0
9	208.5	0.1	0	255	21.53	255	1		1
10	192.12	0	0	0	0	0	0		0
11	1220.46	0.02	0	255	21.53	255	1	3	1	0.333333
12	208.59	0	0	0	0	0	0		0
13	213.91	0.1	0	255	21.53	255	1		1
14	701.86	0	0	0	0	0	0	2	0	0
15	268.46	0.08	0	255	21.53	255	1		1
16	449.52	0.86	0	255	387.62	4590	18		18
17	182.41	0.24	0	255	43.07	510	2		2
18	258.5	0.17	0	255	43.07	510	2		2
1	321.41	0.2	0	255	64.6	765	3		3
2	225.39	0	0	0	0	0	0		0
3	784.45	0.08	0	255	64.6	765	3	6	3	0.5
4	200.9	0.11	0	255	21.53	255	1		1
5	254.87	0.08	0	255	21.53	255	1		1
6	449.27	0.14	0	255	64.6	765	3	4	3	0.75
7	134.36	0.16	0	255	21.53	255	1		1
8	94.67	0.23	0	255	21.53	255	1		1
9	297.01	0.07	0	255	21.53	255	1		1
10	314.57	0.07	0	255	21.53	255	1		1
11	653.72	0.03	0	255	21.53	255	1	3	1	0.333333
12	281.98	0.08	0	255	21.53	255	1		1
1	319.471	0.067	0	255	21.535	255	1		1
2	208.336	0.103	0	255	21.535	255	1		1
3	310.266	0.069	0	255	21.535	255	1		1
4	110.797	0	0	0	0	0	0		0
5	413.379	0	0	0	0	0	0	4	0	0
6	388.635	0.055	0	255	21.535	255	1	2	1	0.5
7	191.531	0.45	0	255	86.138	1020	4		4
8	587.344	0.293	0	255	172.276	2040	8	2	8	4
9	201.749	0.427	0	255	86.138	1020	4		4
10	691.976	0.467	0	255	323.018	3825	15	3	15	5
11	159.862	0.135	0	255	21.535	255	1		1
12	123.296	0.175	0	255	21.535	255	1		1
1	224.973	0.383	0	255	86.138	1020	4	2	4	2
2	297.092	0.58	0	255	172.276	2040	8	2	8	4
3	147.955	0.437	0	255	64.604	765	3		3
4	174.725	0.493	0	255	86.138	1020	4		4
5	824.984	0.235	0	255	193.811	2295	9	4	9	2.25
6	93.316	0.231	0	255	21.535	255	1		1
1	239.751	0.18	0	255	43.069	510	2	2	2	1
2	169.152	0	0	0	0	0	0		0
3	253.347	0	0	0	0	0	0	3	0	0
4	114.175	0.566	0	255	64.604	765	3		3
5	154.964	0	0	0	0	0	0		0
6	2007.1	0.011	0	255	21.535	255	1	10	1	0.1
7	317.444	0.204	0	255	64.604	765	3		3
1	335.179	0.064	0	255	21.535	255	1		1
2	139.257	0.155	0	255	21.535	255	1		1
3	331.716	0.065	0	255	21.535	255	1		1
4	839.256	0.026	0	255	21.535	255	1	3	1	0.333333
5	582.446	0.037	0	255	21.535	255	1	2	1	0.5
6	174.979	0.615	0	255	107.673	1275	5		5
7	156.315	0	0	0	0	0	0		0
8	308.746	0.07	0	255	21.535	255	1		1
9	475.702	0	0	0	0	0	0	2	0	0
10	399.613	0.054	0	255	21.535	255	1		1
1	748.557	0.144	0	255	107.673	1275	5	4	5	1.25
2	171.094	0.881	0	255	150.742	1785	7		7
3	93.57	0	0	0	0	0	0		0
4	194.571	0.111	0	255	21.535	255	1		1
5	114.513	0.188	0	255	21.535	255	1		1
6	241.018	0.089	0	255	21.535	255	1		1
7	113.331	0	0	0	0	0	0		0
8	747.291	0.086	0	255	64.604	765	3	3	3	1
9	585.57	0.147	0	255	86.138	1020	4	4	4	1
10	0.253	0	0	0	0	0	0		0
1	164.507	0	0	0	0	0	0		0
2	671.624	0.096	0	255	64.604	765	3	4	3	0.75
3	602.545	0.036	0	255	21.535	255	1	3	1	0.333333
4	787.911	0.027	0	255	21.535	255	1	4	1	0.25
5	346.917	0	0	0	0	0	0	6	0	0
6	875.569	0.025	0	255	21.535	255	1	2	1	0.5
7	618.674	0.035	0	255	21.535	255	1	3	1	0.333333
8	167.547	0	0	0	0	0	0		0
9	215.599	0	0	0	0	0	0	2	0	0
10	202.171	0	0	0	0	0	0		0
11	109.615	0	0	0	0	0	0		0
12	241.018	0	0	0	0	0	0		0
13	357.727	0	0	0	0	0	0		0
14	208.758	0	0	0	0	0	0		0
15	389.648	0.055	0	255	21.535	255	1		1
16	109.277	0	0	0	0	0	0		0
17	310.435	0.069	0	255	21.535	255	1		1
18	297.768	0.145	0	255	43.069	510	2		2
19	188.153	0	0	0	0	0	0		0
1	1374.58	0.204	0	255	279.949	3315	13	8	13	1.625
2	411.69	0.052	0	255	21.535	255	1		1
3	483.134	0.045	0	255	21.535	255	1	2	1	0.5
4	692.821	0.031	0	255	21.535	255	1	4	1	0.25
5	190.686	0.226	0	255	43.069	510	2		2
6	173.459	0.621	0	255	107.673	1275	5		5
7	226.915	0.095	0	255	21.535	255	1		1
8	208.42	0.517	0	255	107.673	1275	5		5
1	229.617	0.094	0	255	21.535	255	1		1
2	144.408	0.149	0	255	21.535	255	1		1
3	252.25	0.085	0	255	21.535	255	1		1
4	210.194	0.205	0	255	43.069	510	2		2
5	1.436	0	0	0	0	0	0		0
6	984.93	0.087	0	255	86.138	1020	4	???	4	0
7	194.402	0.111	0	255	21.535	255	1		1
8	245.24	0.088	0	255	21.535	255	1		1
9	285.607	0.226	0	255	64.604	765	3	DEJE en la 23	3
1	521.558	0.041	0	255	21.535	255	1	6	1	0.166667
2	186.379	0.116	0	255	21.535	255	1		1
3	68.319	0.315	0	255	21.535	255	1		1
4	966.605	0.089	0	255	86.138	1020	4	4	4	1
5	687.501	0.094	0	255	64.604	765	3	2	3	1.5
6	176.245	0.122	0	255	21.535	255	1		1
1	382.386	0.056	0	255	21.535	255	1	2	1	0.5
2	357.051	0	0	0	0	0	0		0
3	275.22	0.548	0	255	150.742	1785	7		7
4	327.494	0.066	0	255	21.535	255	1	2	1	0.5
5	360.007	0.06	0	255	21.535	255	1	4	1	0.25
6	591.735	0.182	0	255	107.673	1275	5	2	5	2.5
7	261.032	0.165	0	255	43.069	510	2		2
8	492.001	0.394	0	255	193.811	2295	9	2	9	4.5
9	323.187	0.133	0	255	43.069	510	2		2
1	620.448	0.972	0	255	602.967	7140	28	5	28	5.6
2	388.297	0.055	0	255	21.535	255	1		1
3	692.145	0.062	0	255	43.069	510	2	2	2	1
4	381.288	0	0	0	0	0	0		0
5	142.972	0.301	0	255	43.069	510	2		2
6	570.37	0.076	0	255	43.069	510	2	3	2	0.666667
7	156.484	0.138	0	255	21.535	255	1		1
8	170.165	0.127	0	255	21.535	255	1		1
9	533.212	0.04	0	255	21.535	255	1		1
10	145.506	0.148	0	255	21.535	255	1		1
11	291.687	0.148	0	255	43.069	510	2		2
12	307.479	0.07	0	255	21.535	255	1		1
13	149.728	0.144	0	255	21.535	255	1		1
1	408.565	0.843	0	255	344.553	4080	16		16
2	303.848	0	0	0	0	0	0		0
3	431.704	0	0	0	0	0	0		0
4	587.513	0.147	0	255	86.138	1020	4	2	4	2
5	58.185	0	0	0	0	0	0		0
6	189.082	0.114	0	255	21.535	255	1		1
7	108.855	0	0	0	0	0	0		0
8	614.874	0.07	0	255	43.069	510	2	3	2	0.666667
9	311.026	0.069	0	255	21.535	255	1	2	1	0.5
10	167.8	0	0	0	0	0	0		0
11	488.032	0.044	0	255	21.535	255	1	2	1	0.5
12	801.254	0.054	0	255	43.069	510	2	4	2	0.5
13	635.902	0.034	0	255	21.535	255	1	2	1	0.5
1	113.5	0.19	0	255	21.535	255	1		1
2	291.434	0.074	0	255	21.535	255	1		1
3	67.982	0.317	0	255	21.535	255	1		1
4	694.256	0.062	0	255	43.069	510	2	3	2	0.666667
5	401.302	0.215	0	255	86.138	1020	4	2	4	2
6	144.999	0.149	0	255	21.535	255	1		1
7	284.931	0.076	0	255	21.535	255	1		1
8	184.521	0.117	0	255	21.535	255	1		1
9	161.551	0.133	0	255	21.535	255	1		1
10	1032.22	0.083	0	255	86.138	1020	4	6	4	0.666667
11	186.126	0.116	0	255	21.535	255	1		1
12	428.242	0.05	0	255	21.535	255	1	2	1	0.5
13	594.86	0	0	0	0	0	0	3	0	0
14	124.9	0.517	0	255	64.604	765	3		3
15	188.068	0	0	0	0	0	0		0
1	207.492	0	0	0	0	0	0	2	0	0
2	175.739	0.123	0	255	21.535	255	1		1
3	202.678	0	0	0	0	0	0		0
4	201.411	0	0	0	0	0	0		0
5	110.628	0	0	0	0	0	0		0
6	119.918	0	0	0	0	0	0		0
7	207.238	0	0	0	0	0	0		0
8	303.426	0	0	0	0	0	0		0
9	272.348	0	0	0	0	0	0		0
10	737.326	0.029	0	255	21.535	255	1	3	1	0.333333
11	261.032	0	0	0	0	0	0		0
12	85.463	0.252	0	255	21.535	255	1		1
13	201.411	0	0	0	0	0	0		0
14	220.243	0	0	0	0	0	0		0
15	259.006	0	0	0	0	0	0		0
16	170.165	0.127	0	255	21.535	255	1		1
17	973.53	0.708	0	255	689.105	8160	32		32
18	168.223	0.128	0	255	21.535	255	1		1
19	186.633	0	0	0	0	0	0		0
20	350.38	0	0	0	0	0	0		0
21	495.632	0.434	0	255	215.345	2550	10		10
22	270.068	0	0	0	0	0	0		0
23	1335.9	0.242	0	255	323.018	3825	15	5	15	3
24	199.216	0.108	0	255	21.535	255	1		1

## Sheet: PEO1NT exp1+2
PEO1
Non-treated
	Area	Mean	Min	Max	IntDen	RawIntden	Foci of 53BP1
1	102.606	0.21	0	255	21.535	255	1
2	111.98	0.192	0	255	21.535	255	1
3	100.072	0	0	0	0	0	0
4	223.79	0	0	0	0	0	0
5	60.212	0	0	0	0	0	0
6	86.56	0	0	0	0	0	0
7	75.582	0	0	0	0	0	0
8	121.945	0	0	0	0	0	0
9	84.196	0.256	0	255	21.535	255	1
10	125.745	0.171	0	255	21.535	255	1
11	64.097	0	0	0	0	0	0
12	203.607	0	0	0	0	0	0
13	123.634	0	0	0	0	0	0
14	107.588	0	0	0	0	0	0
15	233.84	0	0	0	0	0	0
16	78.791	0	0	0	0	0	0
17	170.165	0	0	0	0	0	0
18	81.662	0	0	0	0	0	0
19	39.353	0	0	0	0	0	0
20	30.571	0	0	0	0	0	0
21	131.91	0.163	0	255	21.535	255	1
22	95.343	0.226	0	255	21.535	255	1
23	104.801	0.205	0	255	21.535	255	1
24	121.016	0	0	0	0	0	0
25	102.521	0	0	0	0	0	0
26	208.589	0	0	0	0	0	0
27	131.741	0	0	0	0	0	0
28	85.547	0	0	0	0	0	0
29	112.909	0.191	0	255	21.535	255	1
30	91.458	0.235	0	255	21.535	255	1
31	82.169	0	0	0	0	0	0
32	97.201	0	0	0	0	0	0
33	95.09	0	0	0	0	0	0
34	69.671	0	0	0	0	0	0
35	1.182	0	0	0	0	0	0
36	123.887	0	0	0	0	0	0
37	143.479	0.15	0	255	21.535	255	1
38	112.74	0	0	0	0	0	0
39	97.201	0.222	0	255	21.535	255	1
40	111.726	0.193	0	255	21.535	255	1
41	140.608	0.153	0	255	21.535	255	1
42	97.792	0.22	0	255	21.535	255	1
43	95.512	0	0	0	0	0	0
44	106.321	0	0	0	0	0	0
45	100.748	0.214	0	255	21.535	255	1
46	129.461	0	0	0	0	0	0
47	125.576	0.171	0	255	21.535	255	1
48	193.051	0.223	0	255	43.069	510	2
49	114.006	0.189	0	255	21.535	255	1
50	172.023	0	0	0	0	0	0
51	70.431	0.306	0	255	21.535	255	1
52	89.601	0.24	0	255	21.535	255	1
53	167.969	0.128	0	255	21.535	255	1
54	95.428	0.226	0	255	21.535	255	1
55	91.627	0	0	0	0	0	0
56	97.285	0.221	0	255	21.535	255	1
57	93.907	0.229	0	255	21.535	255	1
58	83.098	0	0	0	0	0	0
59	80.058	0.269	0	255	21.535	255	1
60	153.444	0.14	0	255	21.535	255	1
61	92.303	0	0	0	0	0	0
62	127.772	0	0	0	0	0	0
63	94.076	0	0	0	0	0	0
64	176.076	0.122	0	255	21.535	255	1
65	22.21	0	0	0	0	0	0
66	128.278	0.168	0	255	21.535	255	1
67	73.555	0.293	0	255	21.535	255	1
68	178.441	0.121	0	255	21.535	255	1
69	5.236	0	0	0	0	0	0
70	97.285	0	0	0	0	0	0
71	105.139	0.205	0	255	21.535	255	1
72	83.436	0	0	0	0	0	0
73	161.889	0.133	0	255	21.535	255	1
74	138.497	0.155	0	255	21.535	255	1
75	92.05	0.234	0	255	21.535	255	1
76	159.524	0.135	0	255	21.535	255	1
77	102.099	0.211	0	255	21.535	255	1
78	202.256	0.213	0	255	43.069	510	2
79	124.14	0	0	0	0	0	0
80	99.566	0.216	0	255	21.535	255	1
81	94.752	0	0	0	0	0	0
82	98.721	0.873	0	255	86.138	1020	4
83	98.13	0	0	0	0	0	0
84	61.986	0.347	0	255	21.535	255	1
85	78.2	0.275	0	255	21.535	255	1
86	128.447	0.168	0	255	21.535	255	1
87	121.607	0.177	0	255	21.535	255	1
88	122.536	0	0	0	0	0	0
89	73.724	0	0	0	0	0	0
90	101.001	0.213	0	255	21.535	255	1
91	184.606	0.117	0	255	21.535	255	1
92	134.95	0	0	0	0	0	0
93	85.463	0.252	0	255	21.535	255	1
94	76.849	0.56	0	255	43.069	510	2
95	70.431	0.306	0	255	21.535	255	1
96	102.606	0.21	0	255	21.535	255	1
97	126.674	0.34	0	255	43.069	510	2
98	141.452	0	0	0	0	0	0
99	105.73	0.204	0	255	21.535	255	1
100	129.629	0.166	0	255	21.535	255	1
101	142.128	0	0	0	0	0	0
102	77.862	0.277	0	255	21.535	255	1
103	74.991	0.287	0	255	21.535	255	1
104	124.309	0.173	0	255	21.535	255	1
105	92.218	0.234	0	255	21.535	255	1
106	134.443	0	0	0	0	0	0
107	86.476	0.249	0	255	21.535	255	1
108	129.629	0	0	0	0	0	0
109	117.722	0.183	0	255	21.535	255	1
110	36.482	0	0	0	0	0	0
111	97.623	0.441	0	255	43.069	510	2
112	69.839	0.308	0	255	21.535	255	1
113	118.229	0.182	0	255	21.535	255	1
114	117.807	0.183	0	255	21.535	255	1
115	78.369	0.275	0	255	21.535	255	1
116	124.309	0	0	0	0	0	0
117	106.997	0	0	0	0	0	0
118	193.642	0.111	0	255	21.535	255	1
119	183.255	0	0	0	0	0	0
120	75.751	0.284	0	255	21.535	255	1
121	101.17	0.426	0	255	43.069	510	2
122	80.649	0.534	0	255	43.069	510	2
123	75.16	0.287	0	255	21.535	255	1
124	89.094	0.242	0	255	21.535	255	1
125	109.868	0.196	0	255	21.535	255	1
126	34.033	0	0	0	0	0	0
127	117.131	0.184	0	255	21.535	255	1
128	102.775	0.629	0	255	64.604	765	3
129	121.522	0.177	0	255	21.535	255	1
130	114.513	0.188	0	255	21.535	255	1
131	106.744	0.202	0	255	21.535	255	1
132	101.086	0.639	0	255	64.604	765	3
133	88.587	0.243	0	255	21.535	255	1
134	133.936	0.161	0	255	21.535	255	1
135	135.963	0.317	0	255	43.069	510	2
136	122.874	0.175	0	255	21.535	255	1
137	104.295	0.206	0	255	21.535	255	1
138	113.922	0.945	0	255	107.673	1275	5
139	131.234	0.164	0	255	21.535	255	1
140	118.06	0.547	0	255	64.604	765	3
141	157.835	0.409	0	255	64.604	765	3
142	133.007	0.81	0	255	107.673	1275	5
143	109.277	0.394	0	255	43.069	510	2
144	128.954	0.334	0	255	43.069	510	2
145	213.234	0.101	0	255	21.535	255	1
146	139.341	0.155	0	255	21.535	255	1
147	110.713	0.195	0	255	21.535	255	1
148	174.387	0.123	0	255	21.535	255	1
149	181.228	0.238	0	255	43.069	510	2
150	2.027	0	0	0	0	0	0
151	223.537	0.096	0	255	21.535	255	1
1	193.304	0	0	0	0	0	0
2	193.304	0	0	0	0	0	0
3	168.814	0	0	0	0	0	0
4	139.088	0	0	0	0	0	0
5	77.693	0	0	0	0	0	0
6	107.335	0	0	0	0	0	0
7	159.609	0	0	0	0	0	0
8	136.47	0	0	0	0	0	0
9	269.224	0.08	0	255	21.535	255	1
10	230.8	0	0	0	0	0	0
11	147.026	0.146	0	255	21.535	255	1
12	124.731	0	0	0	0	0	0
13	150.742	0.143	0	255	21.535	255	1
14	132.078	0	0	0	0	0	0
15	171.938	0.25	0	255	43.069	510	2
16	125.323	0.172	0	255	21.535	255	1
17	193.726	0	0	0	0	0	0
18	159.862	0	0	0	0	0	0
19	146.519	0	0	0	0	0	0
20	111.304	0.193	0	255	21.535	255	1
21	180.299	0	0	0	0	0	0
22	176.076	0	0	0	0	0	0
23	191.868	0	0	0	0	0	0
24	126.674	0	0	0	0	0	0
25	188.237	0	0	0	0	0	0
26	178.525	0	0	0	0	0	0
27	141.537	0	0	0	0	0	0
28	112.655	0	0	0	0	0	0
29	98.299	0	0	0	0	0	0
30	117.638	0	0	0	0	0	0
31	121.269	0	0	0	0	0	0
32	202.594	0	0	0	0	0	0
33	228.013	0.094	0	255	21.535	255	1
34	109.108	0	0	0	0	0	0
35	201.073	0	0	0	0	0	0
36	146.435	0	0	0	0	0	0
37	213.487	0.101	0	255	21.535	255	1
38	138.919	0	0	0	0	0	0
39	213.15	0.101	0	255	21.535	255	1
40	162.987	0	0	0	0	0	0
41	199.722	0.108	0	255	21.535	255	1
42	190.433	0.113	0	255	21.535	255	1
43	210.87	0.102	0	255	21.535	255	1
44	217.879	0.099	0	255	21.535	255	1
45	195.246	0	0	0	0	0	0
46	235.866	0.183	0	255	43.069	510	2
47	119.073	0	0	0	0	0	0
48	278.682	0	0	0	0	0	0
49	146.688	0.147	0	255	21.535	255	1
50	136.808	0	0	0	0	0	0
51	164	0	0	0	0	0	0
52	241.778	0.089	0	255	21.535	255	1
53	138.75	0.155	0	255	21.535	255	1
54	107.673	0	0	0	0	0	0
55	128.785	0.167	0	255	21.535	255	1
56	117.553	0	0	0	0	0	0
57	124.394	0.173	0	255	21.535	255	1
58	196.344	0.11	0	255	21.535	255	1
59	78.622	0	0	0	0	0	0
60	116.455	0	0	0	0	0	0
61	73.555	0	0	0	0	0	0
62	112.317	0.192	0	255	21.535	255	1
63	133.092	0	0	0	0	0	0
64	167.125	0	0	0	0	0	0
65	162.902	0	0	0	0	0	0
66	130.389	0.165	0	255	21.535	255	1
67	142.55	0	0	0	0	0	0
68	148.63	0.145	0	255	21.535	255	1
69	186.041	0	0	0	0	0	0
70	193.389	0	0	0	0	0	0
71	135.372	0	0	0	0	0	0
72	127.012	0.17	0	255	21.535	255	1
73	141.706	0	0	0	0	0	0
74	146.266	0	0	0	0	0	0
75	234.853	0.092	0	255	21.535	255	1
76	128.869	0	0	0	0	0	0
77	144.408	0.149	0	255	21.535	255	1
78	164.254	0	0	0	0	0	0
79	149.644	0	0	0	0	0	0
80	103.366	0	0	0	0	0	0
81	255.796	0.168	0	255	43.069	510	2
82	116.709	0	0	0	0	0	0
83	137.737	0.156	0	255	21.535	255	1
84	156.484	0	0	0	0	0	0
85	132.163	0	0	0	0	0	0
86	137.145	0.157	0	255	21.535	255	1
87	175.908	0.122	0	255	21.535	255	1
88	124.309	0	0	0	0	0	0
89	129.967	0.166	0	255	21.535	255	1
90	94.161	0	0	0	0	0	0
91	153.275	0	0	0	0	0	0
92	203.522	0	0	0	0	0	0
93	220.835	0.098	0	255	21.535	255	1
94	132.754	0.162	0	255	21.535	255	1
95	176.414	0	0	0	0	0	0
96	146.604	0	0	0	0	0	0
97	67.137	0	0	0	0	0	0
1	0.422	0	0	0	0	0	0
2	237.471	0.091	0	255	21.535	255	1
3	215.261	0.1	0	255	21.535	255	1
4	148.63	0.145	0	255	21.535	255	1
5	148.039	0.145	0	255	21.535	255	1
6	193.473	0.223	0	255	43.069	510	2
7	145.084	0.148	0	255	21.535	255	1
8	186.295	0.116	0	255	21.535	255	1
9	169.405	0.127	0	255	21.535	255	1
10	155.218	0.139	0	255	21.535	255	1
11	172.783	0	0	0	0	0	0
12	139.932	0	0	0	0	0	0
13	171.938	0.125	0	255	21.535	255	1
14	123.971	0.174	0	255	21.535	255	1
15	130.221	0.165	0	255	21.535	255	1
16	117.384	0	0	0	0	0	0
17	124.056	0.174	0	255	21.535	255	1
18	213.487	0	0	0	0	0	0
19	122.62	0.176	0	255	21.535	255	1
20	135.71	0.159	0	255	21.535	255	1
21	246.169	0.525	0	255	129.207	1530	6
22	134.612	0.16	0	255	21.535	255	1
23	189.166	0.114	0	255	21.535	255	1
24	188.237	0.114	0	255	21.535	255	1
25	246.254	0.262	0	255	64.604	765	3
26	155.133	0.139	0	255	21.535	255	1
27	183.339	0.117	0	255	21.535	255	1
28	177.934	0.121	0	255	21.535	255	1
29	116.455	0.185	0	255	21.535	255	1
30	169.405	0.127	0	255	21.535	255	1
31	131.741	0	0	0	0	0	0
32	215.768	0.599	0	255	129.207	1530	6
33	121.607	0.177	0	255	21.535	255	1
34	152.262	0.141	0	255	21.535	255	1
35	295.825	0.073	0	255	21.535	255	1
36	160.791	0.134	0	255	21.535	255	1
37	157.751	0.137	0	255	21.535	255	1
38	132.839	0	0	0	0	0	0
39	234.431	0.092	0	255	21.535	255	1
40	190.348	0.113	0	255	21.535	255	1
41	161.129	0.134	0	255	21.535	255	1
42	161.72	0.133	0	255	21.535	255	1
43	129.207	0.333	0	255	43.069	510	2
44	132.163	0.163	0	255	21.535	255	1
45	137.905	0.156	0	255	21.535	255	1
46	152.515	0.141	0	255	21.535	255	1
47	111.22	0	0	0	0	0	0
48	185.197	0.349	0	255	64.604	765	3
49	128.025	0.168	0	255	21.535	255	1
50	154.626	0.139	0	255	21.535	255	1
51	285.86	0.075	0	255	21.535	255	1
52	60.55	0.356	0	255	21.535	255	1
53	115.526	0.186	0	255	21.535	255	1
54	206.985	0.312	0	255	64.604	765	3
55	98.806	0.218	0	255	21.535	255	1
56	144.155	0.149	0	255	21.535	255	1
57	89.601	0.24	0	255	21.535	255	1
58	109.446	0.59	0	255	64.604	765	3
59	143.986	0.15	0	255	21.535	255	1
60	137.399	0.157	0	255	21.535	255	1
61	133.345	0.161	0	255	21.535	255	1
62	106.828	0.202	0	255	21.535	255	1
63	103.619	0.208	0	255	21.535	255	1
64	156.484	0.138	0	255	21.535	255	1
65	133.43	0.161	0	255	21.535	255	1
66	124.056	0.347	0	255	43.069	510	2
67	93.485	0.23	0	255	21.535	255	1
68	99.734	0.216	0	255	21.535	255	1
69	82.253	0	0	0	0	0	0
70	200.567	0.215	0	255	43.069	510	2
71	98.299	0.219	0	255	21.535	255	1
72	111.473	0.193	0	255	21.535	255	1
73	106.406	0.202	0	255	21.535	255	1
74	139.257	0.155	0	255	21.535	255	1
75	198.455	0.109	0	255	21.535	255	1
76	141.79	0.152	0	255	21.535	255	1
77	151.671	0.142	0	255	21.535	255	1
78	178.61	0.121	0	255	21.535	255	1
79	153.275	0.562	0	255	86.138	1020	4
80	130.558	0.33	0	255	43.069	510	2
81	144.83	0.149	0	255	21.535	255	1
82	99.481	0.216	0	255	21.535	255	1
83	116.286	0.185	0	255	21.535	255	1
84	220.835	0.098	0	255	21.535	255	1
85	111.811	0.193	0	255	21.535	255	1
86	152.093	0.142	0	255	21.535	255	1
87	134.105	0.161	0	255	21.535	255	1
88	127.94	0.505	0	255	64.604	765	3
89	165.183	0.13	0	255	21.535	255	1
90	120.087	0.359	0	255	43.069	510	2
91	152.853	0.141	0	255	21.535	255	1
92	118.482	0.182	0	255	21.535	255	1
93	98.045	0.22	0	255	21.535	255	1
94	65.195	0.33	0	255	21.535	255	1
95	78.031	0.276	0	255	21.535	255	1
96	127.772	0.169	0	255	21.535	255	1
97	85.04	0	0	0	0	0	0

## Sheet: PEO1 CDDP exp1+2
	Area	Mean	Min	Max	IntDen	RawIntden	Foci of 53BP1
1	178.272	2.295	0	255	409.156	4845	19
2	138.834	0.776	0	255	107.673	1275	5
3	89.263	0.724	0	255	64.604	765	3
4	122.874	0.175	0	255	21.535	255	1
5	275.558	1.016	0	255	279.949	3315	13
6	100.157	0.215	0	255	21.535	255	1
7	87.236	0.247	0	255	21.535	255	1
8	192.966	0.893	0	255	172.276	2040	8
9	211.714	0.712	0	255	150.742	1785	7
10	146.942	2.345	0	255	344.553	4080	16
11	177.005	0.122	0	255	21.535	255	1
12	112.402	0.958	0	255	107.673	1275	5
13	229.533	1.407	0	255	323.018	3825	15
14	162.734	1.456	0	255	236.88	2805	11
15	128.194	0.168	0	255	21.535	255	1
16	718.662	0.599	0	255	430.691	5100	20
17	139.341	0.155	0	255	21.535	255	1
18	260.188	1.49	0	255	387.622	4590	18
19	1.013	0	0	0	0	0	0
20	154.12	0.14	0	255	21.535	255	1
21	192.122	1.793	0	255	344.553	4080	16
22	181.397	0.237	0	255	43.069	510	2
23	165.605	0.13	0	255	21.535	255	1
24	178.357	0.724	0	255	129.207	1530	6
25	104.548	0.824	0	255	86.138	1020	4
26	215.768	0.299	0	255	64.604	765	3
27	157.16	0.137	0	255	21.535	255	1
28	195.838	0.11	0	255	21.535	255	1
29	195.415	0.551	0	255	107.673	1275	5
30	398.853	0.216	0	255	86.138	1020	4
31	141.368	0.305	0	255	43.069	510	2
32	202.847	0.106	0	255	21.535	255	1
33	152.853	0	0	0	0	0	0
34	127.687	0.169	0	255	21.535	255	1
35	183.255	0.118	0	255	21.535	255	1
36	218.048	0.099	0	255	21.535	255	1
37	230.884	0.093	0	255	21.535	255	1
38	163.831	0.131	0	255	21.535	255	1
39	155.218	0.139	0	255	21.535	255	1
40	65.026	0	0	0	0	0	0
41	198.118	0.109	0	255	21.535	255	1
42	180.046	0.12	0	255	21.535	255	1
43	173.036	0.124	0	255	21.535	255	1
44	262.046	0.082	0	255	21.535	255	1
45	162.396	0.265	0	255	43.069	510	2
1	468.524	0.643	0	255	301.483	3570	14
2	86.054	0	0	0	0	0	0
3	125.154	0.172	0	255	21.535	255	1
4	155.133	0.139	0	255	21.535	255	1
5	84.534	0.255	0	255	21.535	255	1
6	107.757	0.4	0	255	43.069	510	2
7	215.345	0.4	0	255	86.138	1020	4
8	162.058	1.063	0	255	172.276	2040	8
9	136.47	0.789	0	255	107.673	1275	5
10	128.785	0.502	0	255	64.604	765	3
11	59.621	0.361	0	255	21.535	255	1
12	65.364	0.329	0	255	21.535	255	1
13	94.667	1.365	0	255	129.207	1530	6
14	143.395	0.3	0	255	43.069	510	2
15	134.274	0.802	0	255	107.673	1275	5
16	53.287	0.404	0	255	21.535	255	1
17	114.851	0.188	0	255	21.535	255	1
18	133.514	0.484	0	255	64.604	765	3
19	156.822	0.275	0	255	43.069	510	2
20	305.115	0.565	0	255	172.276	2040	8
21	97.201	0.222	0	255	21.535	255	1
22	189.251	0.455	0	255	86.138	1020	4
23	101.001	0.64	0	255	64.604	765	3
24	117.215	0.184	0	255	21.535	255	1
25	60.634	0	0	0	0	0	0
26	156.822	0.137	0	255	21.535	255	1
27	75.582	0.285	0	255	21.535	255	1
28	141.115	0.153	0	255	21.535	255	1
29	65.195	0.33	0	255	21.535	255	1
30	94.499	0.228	0	255	21.535	255	1
31	63.421	0	0	0	0	0	0
32	28.29	0	0	0	0	0	0
33	43.491	0	0	0	0	0	0
34	92.894	0.232	0	255	21.535	255	1
35	77.693	0.277	0	255	21.535	255	1
36	87.32	0.247	0	255	21.535	255	1
37	143.732	0.15	0	255	21.535	255	1
38	204.874	0.105	0	255	21.535	255	1
39	89.347	0.482	0	255	43.069	510	2
40	160.453	0.671	0	255	107.673	1275	5
41	230.124	0.655	0	255	150.742	1785	7
42	128.363	0	0	0	0	0	0
43	103.366	0.625	0	255	64.604	765	3
44	34.202	0	0	0	0	0	0
45	104.464	0.412	0	255	43.069	510	2
46	229.617	0.188	0	255	43.069	510	2
47	118.567	0	0	0	0	0	0
48	131.825	0.163	0	255	21.535	255	1
49	174.556	0	0	0	0	0	0
50	153.866	0.14	0	255	21.535	255	1
51	104.464	0.206	0	255	21.535	255	1
52	113.584	0.19	0	255	21.535	255	1
53	155.302	0.971	0	255	150.742	1785	7

## Sheet: PEO4 CDDP exp1+2
	Area	Mean	Min	Max	IntDen	RawIntden	Foci of 53BP1
1	144.661	0.298	0	255	43.069	510	2
2	149.982	0.287	0	255	43.069	510	2
3	174.725	0.123	0	255	21.535	255	1
4	192.713	0.112	0	255	21.535	255	1
5	118.482	0.182	0	255	21.535	255	1
6	175.992	0.367	0	255	64.604	765	3
7	186.633	0.115	0	255	21.535	255	1
8	107.082	0.201	0	255	21.535	255	1
9	142.804	0.603	0	255	86.138	1020	4
10	117.047	0.368	0	255	43.069	510	2
11	122.874	0.351	0	255	43.069	510	2
12	90.023	0.478	0	255	43.069	510	2
13	152.262	0.141	0	255	21.535	255	1
14	109.446	0.59	0	255	64.604	765	3
15	60.634	0	0	0	0	0	0
16	49.572	0	0	0	0	0	0
17	51.514	0.418	0	255	21.535	255	1
18	157.244	0.274	0	255	43.069	510	2
19	111.557	0.386	0	255	43.069	510	2
20	212.221	0.406	0	255	86.138	1020	4
21	100.663	0.642	0	255	64.604	765	3
22	140.354	0	0	0	0	0	0
23	90.529	0.238	0	255	21.535	255	1
24	133.092	0	0	0	0	0	0
25	124.14	0.173	0	255	21.535	255	1
26	136.048	0.475	0	255	64.604	765	3
27	196.344	0.11	0	255	21.535	255	1
28	128.447	0.335	0	255	43.069	510	2
29	160.031	0.269	0	255	43.069	510	2
30	135.119	0.159	0	255	21.535	255	1
31	115.104	0.187	0	255	21.535	255	1
32	160.707	0.402	0	255	64.604	765	3
33	251.236	0	0	0	0	0	0
34	94.245	0.228	0	255	21.535	255	1
35	140.608	0	0	0	0	0	0
36	96.694	0	0	0	0	0	0
37	122.282	0	0	0	0	0	0
38	168.814	0.128	0	255	21.535	255	1
39	105.899	0	0	0	0	0	0
40	138.919	0	0	0	0	0	0
41	215.599	0.1	0	255	21.535	255	1
42	84.956	0	0	0	0	0	0
43	100.072	0	0	0	0	0	0
44	163.916	0.263	0	255	43.069	510	2
45	75.075	0	0	0	0	0	0
46	173.205	0	0	0	0	0	0
47	171.516	0	0	0	0	0	0
48	158.427	0	0	0	0	0	0
49	88.925	0	0	0	0	0	0
50	124.985	0	0	0	0	0	0
51	91.796	0	0	0	0	0	0
52	135.625	0	0	0	0	0	0
53	153.782	0.28	0	255	43.069	510	2
54	156.822	0	0	0	0	0	0
55	151.248	0.142	0	255	21.535	255	1
56	156.569	0.138	0	255	21.535	255	1
57	188.744	0	0	0	0	0	0
1	160.622	0.134	0	255	21.535	255	1
2	130.474	0.33	0	255	43.069	510	2
3	155.218	0	0	0	0	0	0
4	134.274	0	0	0	0	0	0
5	116.624	0.369	0	255	43.069	510	2
6	119.073	0	0	0	0	0	0
7	154.12	0.14	0	255	21.535	255	1
8	129.883	0	0	0	0	0	0
9	127.434	0.507	0	255	64.604	765	3
10	138.074	0.156	0	255	21.535	255	1
11	132.163	0.163	0	255	21.535	255	1
12	127.856	0.168	0	255	21.535	255	1
13	139.341	0	0	0	0	0	0
14	82.338	0.262	0	255	21.535	255	1
15	136.808	0.157	0	255	21.535	255	1
16	102.437	0.21	0	255	21.535	255	1
17	92.894	0.232	0	255	21.535	255	1
18	170.503	0.126	0	255	21.535	255	1
19	117.384	0	0	0	0	0	0
20	132.247	0.326	0	255	43.069	510	2
21	133.261	0.323	0	255	43.069	510	2
22	182.157	0	0	0	0	0	0
23	153.36	0.14	0	255	21.535	255	1
24	251.405	0.086	0	255	21.535	255	1
25	105.899	0.203	0	255	21.535	255	1
26	163.831	0.263	0	255	43.069	510	2
27	49.825	0.432	0	255	21.535	255	1
28	140.946	0.611	0	255	86.138	1020	4
29	113.669	0	0	0	0	0	0
30	69.248	0	0	0	0	0	0
31	161.889	0.133	0	255	21.535	255	1
32	63.928	0	0	0	0	0	0
33	87.743	0	0	0	0	0	0
34	95.343	0	0	0	0	0	0
35	109.193	0.197	0	255	21.535	255	1
36	189.335	0.114	0	255	21.535	255	1
37	194.655	0.111	0	255	21.535	255	1
38	122.029	0	0	0	0	0	0
39	148.63	0.29	0	255	43.069	510	2
40	135.203	0.478	0	255	64.604	765	3
41	160.791	0.402	0	255	64.604	765	3
42	137.314	0.157	0	255	21.535	255	1
43	269.139	0.08	0	255	21.535	255	1
44	158.004	0.545	0	255	86.138	1020	4
45	181.481	0.119	0	255	21.535	255	1
46	152.177	0.283	0	255	43.069	510	2
47	131.487	0	0	0	0	0	0
48	168.307	0.256	0	255	43.069	510	2
49	278.513	0.155	0	255	43.069	510	2
50	143.901	0.15	0	255	21.535	255	1
51	33.189	0.649	0	255	21.535	255	1
52	178.188	0.121	0	255	21.535	255	1
53	106.321	0.203	0	255	21.535	255	1
54	108.095	0.199	0	255	21.535	255	1
55	109.446	0.197	0	255	21.535	255	1
56	185.535	0.348	0	255	64.604	765	3
57	195.331	0.551	0	255	107.673	1275	5
58	98.721	0.218	0	255	21.535	255	1
59	67.982	0	0	0	0	0	0
60	109.531	0.197	0	255	21.535	255	1
61	115.02	0.187	0	255	21.535	255	1
62	164.422	0.262	0	255	43.069	510	2
63	177.934	0.121	0	255	21.535	255	1
64	189.082	0.114	0	255	21.535	255	1
65	170.249	0.126	0	255	21.535	255	1
66	133.852	0	0	0	0	0	0
67	186.633	0.115	0	255	21.535	255	1
68	169.236	0.636	0	255	107.673	1275	5
69	1.52	0	0	0	0	0	0
70	238.822	0.361	0	255	86.138	1020	4
71	168.814	0.128	0	255	21.535	255	1
72	175.232	0.123	0	255	21.535	255	1
73	132.839	0.324	0	255	43.069	510	2
74	134.865	0.16	0	255	21.535	255	1
75	151.671	0.142	0	255	21.535	255	1
76	156.4	0.551	0	255	86.138	1020	4
77	454.168	0.047	0	255	21.535	255	1
78	165.436	0.13	0	255	21.535	255	1
79	169.996	0	0	0	0	0	0
80	105.393	0.409	0	255	43.069	510	2
81	175.063	0	0	0	0	0	0
82	138.412	0.156	0	255	21.535	255	1
