# Supplementary material for: Inhibitors of Rho kinases (ROCK) induce multiple mitotic defects and synthetic lethality in BRCA2-deficient cells
Source: eLife journal article supplement (doi:10.7554/elife.80254), 2023-04-19
Supplement: supp [file Figure 3- figure supplement 2- data 3.xlsx]

## Sheet: BRCA2 Fasudil exp1
BRCA2
Exp1	Area	Mean	Min	Max	IntDen	RawIntDen	53BP1 Foci number	Nuclei	53BP1/nuclei
1	119.03	0.12	0	255	13.78	255	1		1
2	115.73	0	0	0	0	0	0		0
3	108.76	0	0	0	0	0	0		0
4	87.46	0	0	0	0	0	0		0
5	141.09	0.1	0	255	13.78	255	1		1
6	133.74	0	0	0	0	0	0		0
7	359.58	0.08	0	255	27.57	510	2	2	1
8	107.57	0	0	0	0	0	0		0
9	85.14	0.16	0	255	13.78	255	1		1
10	360.45	0.04	0	255	13.78	255	1	4	1
11	111.57	0	0	0	0	0	0		0
12	155.74	0	0	0	0	0	0		0
13	194.76	0.07	0	255	13.78	255	1		1
14	147.09	0.09	0	255	13.78	255	1	2	0.5
15	113.73	0	0	0	0	0	0		0
16	126.17	0.22	0	255	27.57	510	2		2
17	193.52	0.21	0	255	41.35	765	3	2	1.5
18	173.68	0.08	0	255	13.78	255	1		1
19	144.01	0.38	0	255	55.14	1020	4	2	2
20	77.62	0.18	0	255	13.78	255	1		1
21	98.44	0.28	0	255	27.57	510	2		2
22	70.49	0	0	0	0	0	0		0
23	77.3	0	0	0	0	0	0		0
24	111.95	0.25	0	255	27.57	510	2		2
25	66.76	0	0	0	0	0	0		0
26	734.57	0.02	0	255	13.78	255	1	4	1
27	92.92	0.15	0	255	13.78	255	1		1
28	86.98	0	0	0	0	0	0		0
29	195.9	0.28	0	255	55.14	1020	4		4
30	882.47	0.08	0	255	68.92	1275	5	9	5
31	138.06	0	0	0	0	0	0		0
32	103.73	0	0	0	0	0	0		0
33	95.9	0.14	0	255	13.78	255	1		1
34	78.87	0	0	0	0	0	0		0
35	98.87	0.14	0	255	13.78	255	1	2	0.5
36	92.71	0.15	0	255	13.78	255	1		1
37	697.76	0.02	0	255	13.78	255	1	4	1
38	820.09	0.02	0	255	13.78	255	1	6	1
39	175.41	0.08	0	255	13.78	255	1		1
40	142.11	0	0	0	0	0	0		0
41	96.98	0.14	0	255	13.78	255	1		1
1	193.31	0.43	0	255	82.71	1530	6	2	3
2	89.68	0.15	0	255	13.78	255	1		1
3	134.87	0.1	0	255	13.78	255	1		1
4	119.84	0.12	0	255	13.78	255	1		1
5	114.44	0.24	0	255	27.57	510	2		2
6	93.95	0.15	0	255	13.78	255	1		1
7	88.06	0	0	0	0	0	0		0
8	83.57	0.33	0	255	27.57	510	2		2
9	80.27	0.17	0	255	13.78	255	1		1
10	99.3	0.14	0	255	13.78	255	1		1
11	96.6	0.29	0	255	27.57	510	2		2
12	148.98	0.09	0	255	13.78	255	1		1
13	205.09	0.2	0	255	41.35	765	3		3
14	117.36	0.12	0	255	13.78	255	1	2	0.5
15	71.35	0.39	0	255	27.57	510	2		2
16	153.25	0.18	0	255	27.57	510	2		2
17	126.6	0.11	0	255	13.78	255	1		1
18	72.11	0.19	0	255	13.78	255	1		1
19	93.08	0.15	0	255	13.78	255	1		1
20	140.17	0.1	0	255	13.78	255	1		1
21	91.25	0.3	0	255	27.57	510	2		2
22	132.17	0.1	0	255	13.78	255	1		1
23	95.03	0.15	0	255	13.78	255	1		1
24	74.65	0.37	0	255	27.57	510	2		2
25	100.71	0.14	0	255	13.78	255	1		1
26	840.2	0.08	0	255	68.92	1275	5	6	5
27	204.17	0.14	0	255	27.57	510	2		2
28	100.54	0.27	0	255	27.57	510	2		2
29	142.98	0.1	0	255	13.78	255	1		1
30	82.49	0.17	0	255	13.78	255	1		1
31	102	0.27	0	255	27.57	510	2		2
32	140.01	0.1	0	255	13.78	255	1		1
33	107.46	0.13	0	255	13.78	255	1		1
34	78.76	0	0	0	0	0	0		0
35	102	0	0	0	0	0	0		0
36	119.25	0.12	0	255	13.78	255	1		1
37	98.38	0.28	0	255	27.57	510	2		2
38	80.98	0.17	0	255	13.78	255	1		1
39	203.63	0.07	0	255	13.78	255	1	2	0.5
40	75.52	0.55	0	255	41.35	765	3		3
41	152.6	0.09	0	255	13.78	255	1	2	0.5
42	152.49	0.09	0	255	13.78	255	1		1
43	89.08	0.15	0	255	13.78	255	1		1
44	103.14	0.13	0	255	13.78	255	1		1
45	92	0.15	0	255	13.78	255	1		1
46	73.08	0.19	0	255	13.78	255	1		1
47	95.68	0.29	0	255	27.57	510	2		2
48	162.98	0.17	0	255	27.57	510	2		2
49	196.28	0.07	0	255	13.78	255	1		1
50	220.39	0.19	0	255	41.35	765	3	2	1.5
51	1118.05	0.02	0	255	27.57	510	2	5	2
52	156.17	0.09	0	255	13.78	255	1		1
53	199.31	0.07	0	255	13.78	255	1		1
54	86.76	0.16	0	255	13.78	255	1		1
55	116.22	0.24	0	255	27.57	510	2		2
56	70	0.2	0	255	13.78	255	1		1
1	282.66	0.05	0	255	13.78	255	1		1
2	145.14	0.09	0	255	13.78	255	1		1
3	75.35	0.18	0	255	13.78	255	1		1
4	81.79	0.17	0	255	13.78	255	1		1
5	236.87	0.06	0	255	13.78	255	1		1
6	135.19	0.1	0	255	13.78	255	1		1
7	151.9	0.09	0	255	13.78	255	1		1
8	301.09	0.05	0	255	13.78	255	1	2	0.5
9	169.84	0.32	0	255	55.14	1020	4	2	2
10	127.84	0.11	0	255	13.78	255	1		1
11	52.98	0	0	0	0	0	0		0
12	138.06	0.1	0	255	13.78	255	1		1
13	85.14	0	0	0	0	0	0		0
14	96.27	0.14	0	255	13.78	255	1		1
15	133.74	0.21	0	255	27.57	510	2	2	1
16	81.95	0.17	0	255	13.78	255	1		1
17	156.22	0.18	0	255	27.57	510	2		2
18	124.71	0.22	0	255	27.57	510	2		2
19	100.81	0.41	0	255	41.35	765	3		3
20	145.9	0.09	0	255	13.78	255	1		1
21	93.84	0.15	0	255	13.78	255	1		1
22	127.25	0.22	0	255	27.57	510	2		2
23	105.3	0.39	0	255	41.35	765	3		3
24	326.34	0.04	0	255	13.78	255	1	2	0.5
25	103.63	0.13	0	255	13.78	255	1		1
26	142.55	0.39	0	255	55.14	1020	4		4
27	166.82	0.08	0	255	13.78	255	1		1
28	113.46	0.12	0	255	13.78	255	1		1
29	261.96	0.05	0	255	13.78	255	1	2	0.5
30	61.79	0.22	0	255	13.78	255	1		1
31	163.2	0.08	0	255	13.78	255	1		1
32	114.27	0	0	0	0	0	0		0
33	97.14	0.57	0	255	55.14	1020	4		4
34	74.71	0.18	0	255	13.78	255	1		1
35	505.26	0.08	0	255	41.35	765	3	2	1.5
36	73.46	0.56	0	255	41.35	765	3		3
37	135.3	0.1	0	255	13.78	255	1		1
38	72.06	0.19	0	255	13.78	255	1		1
39	314.55	0.09	0	255	27.57	510	2		2
40	169.3	0.08	0	255	13.78	255	1		1
41	130.33	0.11	0	255	13.78	255	1		1
42	100.87	0	0	0	0	0	0		0
43	85.19	0.16	0	255	13.78	255	1		1
44	115.19	0.12	0	255	13.78	255	1		1
45	120.76	0.11	0	255	13.78	255	1		1
46	64.76	0.21	0	255	13.78	255	1		1
1	223.58	0.12	0	255	27.57	510	2		2
2	1766.72	0.01	0	255	13.78	255	1	5	0.2
3	188.49	0	0	0	0	0	0		0
4	755.54	0	0	0	0	0	0	2	0
5	107.63	0	0	0	0	0	0		0
6	161.63	0.09	0	255	13.78	255	1		1
7	112.49	0.12	0	255	13.78	255	1		1
8	186.71	0.07	0	255	13.78	255	1		1
9	616.73	0.09	0	255	55.14	1020	4	4	1
10	153.57	0	0	0	0	0	0		0
11	56.6	0	0	0	0	0	0		0
12	85.35	0.16	0	255	13.78	255	1		1
13	156.98	0.09	0	255	13.78	255	1		1
14	193.36	0.14	0	255	27.57	510	2	2	1
15	112.55	0	0	0	0	0	0		0
16	314.66	0	0	0	0	0	0	2	0
17	103.46	0	0	0	0	0	0		0
18	305.36	0.05	0	255	13.78	255	1	2	0.5
19	985.01	0.1	0	255	96.49	1785	7	6	1.16667
20	173.03	0.08	0	255	13.78	255	1		1
21	106.44	0.13	0	255	13.78	255	1		1
22	102	0.14	0	255	13.78	255	1		1
23	104.6	0.13	0	255	13.78	255	1		1
24	495.91	0.19	0	255	96.49	1785	7	4	1.75
25	93.41	0.15	0	255	13.78	255	1		1
26	103.36	0.13	0	255	13.78	255	1		1
27	98.71	0.14	0	255	13.78	255	1		1
28	314.82	0.04	0	255	13.78	255	1		1
29	87.68	0	0	0	0	0	0		0
30	286.01	0.05	0	255	13.78	255	1		1
31	99.57	0.14	0	255	13.78	255	1		1
32	85.46	0.16	0	255	13.78	255	1		1
33	259.42	0	0	0	0	0	0	2	0
34	102.6	0.13	0	255	13.78	255	1		1
35	98.22	0.14	0	255	13.78	255	1		1
36	91.41	0.15	0	255	13.78	255	1		1
37	87.73	0.16	0	255	13.78	255	1		1
38	99.73	0.14	0	255	13.78	255	1		1
39	68.65	0.2	0	255	13.78	255	1		1
40	102.87	0	0	0	0	0	0		0
41	117.3	0.12	0	255	13.78	255	1		1
42	66.54	0	0	0	0	0	0		0
1	199.47	0.07	0	255	13.78	255	1		1
2	234.28	0.18	0	255	41.35	765	3	2	1.5
3	101.63	0.14	0	255	13.78	255	1		1
4	1186.1	0.05	0	255	55.14	1020	4	4	1
5	130.55	0.11	0	255	13.78	255	1		1
6	260.17	0.21	0	255	55.14	1020	4	2	2
7	169.52	0.24	0	255	41.35	765	3		3
8	245.09	0.56	0	255	137.84	2550	10		10
9	116.33	0.12	0	255	13.78	255	1		1
10	1636.55	0.05	0	255	82.71	1530	6	8	0.75
11	179.68	0.31	0	255	55.14	1020	4		4
12	98.49	0.14	0	255	13.78	255	1		1
13	352.88	0.2	0	255	68.92	1275	5	2	2.5
14	173.57	0.16	0	255	27.57	510	2		2
15	958.42	0.06	0	255	55.14	1020	4	6	0.666667
16	226.93	0.06	0	255	13.78	255	1		1
17	251.79	0.11	0	255	27.57	510	2	2	1
18	269.85	0.15	0	255	41.35	765	3	2	1.5
19	125.46	0.11	0	255	13.78	255	1		1
20	882.41	0.09	0	255	82.71	1530	6		6
1	108.11	0	0	0	0	0	0		0
2	209.85	0.07	0	255	13.78	255	1		1
3	137.95	0.1	0	255	13.78	255	1		1
4	133.36	0.1	0	255	13.78	255	1		1
5	265.69	0	0	0	0	0	0	2	0
6	67.95	0.2	0	255	13.78	255	1		1
7	109.84	0.13	0	255	13.78	255	1		1
8	148.82	0.09	0	255	13.78	255	1		1
9	185.25	0	0	0	0	0	0		0
10	154.87	0	0	0	0	0	0		0
11	65.41	0.21	0	255	13.78	255	1		1
12	105.36	0.13	0	255	13.78	255	1		1
13	84.81	0.16	0	255	13.78	255	1		1
14	112.76	0	0	0	0	0	0		0
15	144.06	0.38	0	255	55.14	1020	4		4
16	156.82	0	0	0	0	0	0	2	0
17	443.48	0.09	0	255	41.35	765	3	2	1.5
18	77.35	0.18	0	255	13.78	255	1		1
19	176.01	0.16	0	255	27.57	510	2	2	1
20	187.2	0.07	0	255	13.78	255	1		1
21	544.72	0.05	0	255	27.57	510	2	5	0.4
22	55.25	0.25	0	255	13.78	255	1		1
23	72.71	0.57	0	255	41.35	765	3		3
24	54.81	0.25	0	255	13.78	255	1		1
25	90.17	0.15	0	255	13.78	255	1	2	0.5
26	110.82	0.25	0	255	27.57	510	2		2
27	73.25	0.19	0	255	13.78	255	1		1
28	193.31	0.29	0	255	55.14	1020	4	2	2
29	119.14	0.12	0	255	13.78	255	1		1
30	72.11	0.38	0	255	27.57	510	2		2
31	124.44	0.11	0	255	13.78	255	1		1
32	199.85	0.07	0	255	13.78	255	1		1
33	311.85	0.04	0	255	13.78	255	1	2	0.5
34	55.41	0.25	0	255	13.78	255	1		1
35	64.11	0.43	0	255	27.57	510	2		2
36	677.11	0.02	0	255	13.78	255	1	6	0.166667
37	159.74	0.26	0	255	41.35	765	3		3
38	124.98	0.44	0	255	55.14	1020	4		4
39	79.14	0.17	0	255	13.78	255	1		1
40	68.33	0.4	0	255	27.57	510	2		2
41	214.98	0.19	0	255	41.35	765	3	2	1.5
42	100.92	0	0	0	0	0	0		0
43	123.84	0.22	0	255	27.57	510	2		2
44	152.38	0.54	0	255	82.71	1530	6		6
45	194.98	0.07	0	255	13.78	255	1		1
46	68.54	0.2	0	255	13.78	255	1		1
47	117.19	0.12	0	255	13.78	255	1		1
48	138.11	0.6	0	255	82.71	1530	6		6
49	123.09	0	0	0	0	0	0		0
50	68.71	0.2	0	255	13.78	255	1		1
51	555.75	0.05	0	255	27.57	510	2	4	0.5
52	53.03	0.26	0	255	13.78	255	1		1
53	48.22	0	0	0	0	0	0		0
54	141.47	0.29	0	255	41.35	765	3		3
55	160.98	0.09	0	255	13.78	255	1		1
56	131.41	0.1	0	255	13.78	255	1		1
57	121.57	0.11	0	255	13.78	255	1		1
58	192.82	0.14	0	255	27.57	510	2		2
59	133.46	0.1	0	255	13.78	255	1		1
1	1310.81	0.09	0	255	124.06	2295	9	14	0.642857
2	329.85	0.08	0	255	27.57	510	2	4	0.5
3	218.44	0.57	0	255	124.06	2295	9	2	4.5
4	261.52	0.05	0	255	13.78	255	1		1
5	313.42	0.04	0	255	13.78	255	1		1
6	170.22	0.16	0	255	27.57	510	2		2
7	310.93	0.09	0	255	27.57	510	2		2
8	236.87	0.17	0	255	41.35	765	3	2	1.5
9	243.42	0.34	0	255	82.71	1530	6		6
10	394.34	0.17	0	255	68.92	1275	5	2	2.5
11	105.41	0.13	0	255	13.78	255	1		1
12	75.79	0.36	0	255	27.57	510	2		2
13	349.15	0.04	0	255	13.78	255	1		1
14	873.6	0.05	0	255	41.35	765	3	4	0.75
15	247.96	0.11	0	255	27.57	510	2	2	1
16	145.84	0	0	0	0	0	0		0
17	157.52	0.26	0	255	41.35	765	3		3
18	85.73	0.16	0	255	13.78	255	1		1
19	110.38	0	0	0	0	0	0		0
20	118.82	0.23	0	255	27.57	510	2		2
21	195.52	0.42	0	255	82.71	1530	6		6
22	108.33	0.13	0	255	13.78	255	1		1
23	125.36	0.11	0	255	13.78	255	1		1
24	91.3	0.15	0	255	13.78	255	1		1
25	1999	0.06	0	255	110.27	2040	8	8	1
26	161.9	0.09	0	255	13.78	255	1		1
27	119.25	0.23	0	255	27.57	510	2		2
28	90.06	0.15	0	255	13.78	255	1		1
29	146.49	0	0	0	0	0	0		0
30	117.95	0.23	0	255	27.57	510	2		2
31	305.42	0.14	0	255	41.35	765	3	2	1.5
32	99.73	0.55	0	255	55.14	1020	4		4
33	107.9	0.38	0	255	41.35	765	3		3
34	95.19	0	0	0	0	0	0		0
35	149.74	0.09	0	255	13.78	255	1		1
36	81.9	0.17	0	255	13.78	255	1		1
37	262.12	0.16	0	255	41.35	765	3	2	1.5
38	277.9	0.1	0	255	27.57	510	2	2	1
39	122.92	0.11	0	255	13.78	255	1		1
40	294.34	0.05	0	255	13.78	255	1	2	0.5
1	137.249	0.1	0	255	13.784	255	1		1
2	90.274	0.153	0	255	13.784	255	1		1
3	299.147	0	0	0	0	0	0	2	0
4	76.976	0.179	0	255	13.784	255	1		1
5	102.112	0	0	0	0	0	0		0
6	81.03	0.17	0	255	13.784	255	1		1
7	70.381	0.196	0	255	13.784	255	1		1
8	101.139	0.136	0	255	13.784	255	1		1
9	108.004	0.128	0	255	13.784	255	1		1
10	55.84	0	0	0	0	0	0		0
11	100.869	0.273	0	255	27.569	510	2		2
12	81.355	0.169	0	255	13.784	255	1		1
13	128.87	0.107	0	255	13.784	255	1	2	0.5
14	46.002	0.3	0	255	13.784	255	1		1
15	70.057	0.197	0	255	13.784	255	1		1
16	106.437	0.13	0	255	13.784	255	1		1
17	86.598	0.159	0	255	13.784	255	1		1
18	142.925	0.096	0	255	13.784	255	1		1
19	128.762	0	0	0	0	0	0		0
20	105.518	0.131	0	255	13.784	255	1		1
21	134.87	0.102	0	255	13.784	255	1		1
22	104.491	0	0	0	0	0	0		0
23	60.543	0.228	0	255	13.784	255	1		1
24	88.923	0.155	0	255	13.784	255	1		1
25	73.733	0.187	0	255	13.784	255	1		1
26	51.299	0.269	0	255	13.784	255	1		1
27	129.573	0.426	0	255	55.137	1020	4	2	2
28	113.086	0.122	0	255	13.784	255	1		1
29	91.95	0.15	0	255	13.784	255	1		1
30	65.624	0.21	0	255	13.784	255	1		1
31	129.14	0.107	0	255	13.784	255	1		1
32	99.842	0.138	0	255	13.784	255	1		1
33	58.867	0.234	0	255	13.784	255	1		1
34	222.171	0.062	0	255	13.784	255	1	2	0.5
35	61.732	0.223	0	255	13.784	255	1		1
36	92.761	0.149	0	255	13.784	255	1		1
37	215.198	0.192	0	255	41.353	765	3	2	1.5
38	105.356	0.262	0	255	27.569	510	2		2
39	87.841	0.157	0	255	13.784	255	1		1
40	97.031	0.142	0	255	13.784	255	1		1
41	108.977	0.126	0	255	13.784	255	1	2	0.5
42	76.814	0.179	0	255	13.784	255	1		1
43	85.949	0.16	0	255	13.784	255	1		1
44	69.354	0.199	0	255	13.784	255	1		1
45	103.301	0.267	0	255	27.569	510	2		2
46	99.734	0.138	0	255	13.784	255	1		1
47	56.002	0.246	0	255	13.784	255	1		1
48	96.977	0	0	0	0	0	0		0
49	68.003	1.014	0	255	68.922	1275	5		5
50	69.192	0.199	0	255	13.784	255	1		1
51	79.355	0	0	0	0	0	0		0
52	109.302	0.252	0	255	27.569	510	2	2	1
53	96.707	0.143	0	255	13.784	255	1		1
54	173.25	0.239	0	255	41.353	765	3	2	1.5
55	51.353	0.268	0	255	13.784	255	1		1
56	81.192	0.17	0	255	13.784	255	1		1
57	105.139	0.131	0	255	13.784	255	1		1
58	97.572	0.141	0	255	13.784	255	1		1
59	55.029	0.25	0	255	13.784	255	1		1
60	46.218	0.298	0	255	13.784	255	1		1
61	123.464	0.112	0	255	13.784	255	1		1
62	2.541	0	0	0	0	0	0		0
63	512.778	0.081	0	255	41.353	765	3	2	1.5
64	91.625	0	0	0	0	0	0		0
65	106.329	0.13	0	255	13.784	255	1		1
66	105.139	0	0	0	0	0	0		0
67	54.435	0.253	0	255	13.784	255	1		1
68	101.95	0	0	0	0	0	0		0
69	90.328	0.153	0	255	13.784	255	1		1
70	100.923	0.137	0	255	13.784	255	1		1
71	91.031	0.151	0	255	13.784	255	1		1
72	87.517	0.158	0	255	13.784	255	1		1
73	67.624	0.204	0	255	13.784	255	1		1
74	95.788	0.144	0	255	13.784	255	1		1
75	57.083	0.241	0	255	13.784	255	1		1
76	108.383	0	0	0	0	0	0		0
77	75.733	0.182	0	255	13.784	255	1		1
78	65.138	0.635	0	255	41.353	765	3		3
79	103.896	0.265	0	255	27.569	510	2		2
80	111.032	0.124	0	255	13.784	255	1		1
81	290.823	0.047	0	255	13.784	255	1	4	0.25
82	114.329	0.121	0	255	13.784	255	1		1
83	104.329	0.264	0	255	27.569	510	2		2
84	149.628	0.368	0	255	55.137	1020	4		4
85	63.084	0.219	0	255	13.784	255	1		1
86	122.6	0.112	0	255	13.784	255	1		1
87	76.76	0.359	0	255	27.569	510	2		2
88	95.355	0.289	0	255	27.569	510	2		2
89	45.623	0.302	0	255	13.784	255	1		1
90	1131.4	0.134	0	255	151.628	2805	11	5	2.2
91	130.438	0.951	0	255	124.059	2295	9		9
92	103.301	0.133	0	255	13.784	255	1		1
93	55.57	0.496	0	255	27.569	510	2		2
94	383.745	0.072	0	255	27.569	510	2	4	0.5
95	86.977	0	0	0	0	0	0		0
96	122.329	0.338	0	255	41.353	765	3		3
97	87.679	0.157	0	255	13.784	255	1		1
98	97.139	0.142	0	255	13.784	255	1		1
99	64.705	0.213	0	255	13.784	255	1		1
100	89.679	0.154	0	255	13.784	255	1		1
101	67.408	0.204	0	255	13.784	255	1		1
102	69.084	0.2	0	255	13.784	255	1		1
103	109.842	0.125	0	255	13.784	255	1		1
104	56.813	0.243	0	255	13.784	255	1		1
105	203.738	0.068	0	255	13.784	255	1	2	0.5
106	107.95	0.128	0	255	13.784	255	1		1
107	140.006	0.197	0	255	27.569	510	2	2	1
108	196.549	0.14	0	255	27.569	510	2	2	1
109	225.685	0.061	0	255	13.784	255	1		1
110	87.409	0.315	0	255	27.569	510	2		2
1	115.302	0.12	0	255	13.784	255	1		1
2	89.463	0.308	0	255	27.569	510	2		2
3	68.814	0.2	0	255	13.784	255	1		1
4	238.929	0.577	0	255	137.843	2550	10	2	5
5	258.497	0.107	0	255	27.569	510	2		2
6	112.221	0.123	0	255	13.784	255	1		1
7	152.439	0.09	0	255	13.784	255	1		1
8	228.009	0.242	0	255	55.137	1020	4		4
9	294.12	0.047	0	255	13.784	255	1	2	0.5
10	142.438	0.097	0	255	13.784	255	1		1
11	283.741	0.632	0	255	179.196	3315	13	2	6.5
12	104.491	0.132	0	255	13.784	255	1		1
13	51.894	0.266	0	255	13.784	255	1		1
14	171.304	0.08	0	255	13.784	255	1		1
15	137.735	0.1	0	255	13.784	255	1		1
16	288.877	0.048	0	255	13.784	255	1	2	0.5
17	102.599	0	0	0	0	0	0		0
18	68.922	0.2	0	255	13.784	255	1		1
19	158.655	0.608	0	255	96.49	1785	7		7
20	56.273	0.245	0	255	13.784	255	1		1
21	73.3	0.376	0	255	27.569	510	2		2
22	90.166	0.153	0	255	13.784	255	1		1
23	58.056	0.237	0	255	13.784	255	1		1
24	136.438	0.202	0	255	27.569	510	2		2
25	143.844	0.192	0	255	27.569	510	2		2
26	56.867	0.242	0	255	13.784	255	1		1
27	634.08	0.109	0	255	68.922	1275	5	4	1.25
28	112.707	0.122	0	255	13.784	255	1		1
29	65.841	0.209	0	255	13.784	255	1		1
30	120.545	0.114	0	255	13.784	255	1		1
31	72.922	0.189	0	255	13.784	255	1		1
32	72.003	0.191	0	255	13.784	255	1		1
33	62.543	0.22	0	255	13.784	255	1		1
34	103.95	0.265	0	255	27.569	510	2		2
35	95.896	0.144	0	255	13.784	255	1		1
36	206.657	0.067	0	255	13.784	255	1		1
37	221.144	0.249	0	255	55.137	1020	4	2	2
38	62.651	0.44	0	255	27.569	510	2		2
39	129.789	0.212	0	255	27.569	510	2		2
40	313.742	0.088	0	255	27.569	510	2	2	1
41	66.111	0.209	0	255	13.784	255	1		1
42	34.218	0	0	0	0	0	0		0
43	76.003	0.363	0	255	27.569	510	2		2
44	77.895	0	0	0	0	0	0		0
45	101.896	0.135	0	255	13.784	255	1		1
46	64.489	0.214	0	255	13.784	255	1		1
47	112.761	0.122	0	255	13.784	255	1		1
48	125.573	0.11	0	255	13.784	255	1		1
49	125.302	0.11	0	255	13.784	255	1		1
50	180.44	0.076	0	255	13.784	255	1		1
51	96.653	0.143	0	255	13.784	255	1		1
52	132.546	0.104	0	255	13.784	255	1		1
53	86.814	0	0	0	0	0	0		0
54	196.603	0.07	0	255	13.784	255	1		1
55	599.97	0	0	0	0	0	0	5	0
56	110.059	0.25	0	255	27.569	510	2		2
57	112.113	0.369	0	255	41.353	765	3		3
58	119.194	0	0	0	0	0	0		0
59	360.988	0.038	0	255	13.784	255	1	6	0.166667
60	119.626	0.346	0	255	41.353	765	3	2	1.5

## Sheet: BRCA 2 NT exp1
	Area	Mean	Min	Max	IntDen	RawIntDen	53BP1 Foci number	Nuclei	53BP1/nuclei
1	138.114	0.1	0	255	13.784	255	1		1
2	221.306	0.125	0	255	27.569	510	2		2
3	67.895	0	0	0	0	0	0		0
4	167.737	0.082	0	255	13.784	255	1		1
5	160.547	0.172	0	255	27.569	510	2		2
6	108.112	0.255	0	255	27.569	510	2		2
7	87.463	0.158	0	255	13.784	255	1	2	0.5
8	109.734	0.126	0	255	13.784	255	1		1
9	120.437	0	0	0	0	0	0		0
10	145.952	0.094	0	255	13.784	255	1		1
11	90.652	0	0	0	0	0	0		0
12	170.98	0.081	0	255	13.784	255	1		1
13	124.924	0.11	0	255	13.784	255	1		1
14	107.356	0	0	0	0	0	0		0
15	126.221	0	0	0	0	0	0		0
16	94.22	0.146	0	255	13.784	255	1		1
17	95.734	0	0	0	0	0	0		0
18	100.004	0	0	0	0	0	0		0
19	123.897	0.111	0	255	13.784	255	1		1
20	113.032	0	0	0	0	0	0		0
21	105.356	0.131	0	255	13.784	255	1		1
22	119.032	0.116	0	255	13.784	255	1		1
23	149.844	0	0	0	0	0	0		0
24	208.117	0.199	0	255	41.353	765	3	2	1.5
25	109.626	0.126	0	255	13.784	255	1		1
26	197.359	0.14	0	255	27.569	510	2		2
27	117.897	0.117	0	255	13.784	255	1		1
28	263.957	0.052	0	255	13.784	255	1		1
29	149.411	0.092	0	255	13.784	255	1		1
30	250.01	0.11	0	255	27.569	510	2		2
31	110.923	0.124	0	255	13.784	255	1		1
32	105.518	0.131	0	255	13.784	255	1		1
33	170.602	0.081	0	255	13.784	255	1		1
34	105.734	0.13	0	255	13.784	255	1		1
35	129.14	0.32	0	255	41.353	765	3		3
36	103.193	0.134	0	255	13.784	255	1		1
37	184.602	0.075	0	255	13.784	255	1		1
38	95.626	0.144	0	255	13.784	255	1		1
39	229.469	0.06	0	255	13.784	255	1		1
40	145.79	0.284	0	255	41.353	765	3		3
41	132.762	0.208	0	255	27.569	510	2		2
42	169.899	0.081	0	255	13.784	255	1		1
43	155.195	0	0	0	0	0	0		0
44	140.384	0.098	0	255	13.784	255	1		1
45	104.599	0.132	0	255	13.784	255	1		1
46	96.544	0.143	0	255	13.784	255	1		1
47	153.574	0.09	0	255	13.784	255	1		1
48	83.139	0.166	0	255	13.784	255	1		1
49	146.655	0.094	0	255	13.784	255	1		1
50	198.603	0.069	0	255	13.784	255	1		1
51	103.842	0.133	0	255	13.784	255	1		1
52	162.169	0.085	0	255	13.784	255	1		1
53	171.142	0.081	0	255	13.784	255	1		1
54	241.145	0.114	0	255	27.569	510	2		2
55	112.221	0.123	0	255	13.784	255	1		1
56	120.005	0.23	0	255	27.569	510	2	2	1
57	88.274	0.156	0	255	13.784	255	1		1
58	118.708	0.232	0	255	27.569	510	2		2
59	244.388	0.113	0	255	27.569	510	2		2
60	105.95	0.13	0	255	13.784	255	1		1
61	123.735	0.111	0	255	13.784	255	1		1
62	95.626	0.144	0	255	13.784	255	1		1
63	3.081	0	0	0	0	0	0		0
64	101.355	0.136	0	255	13.784	255	1		1
65	136.924	0.705	0	255	96.49	1785	7		7
66	155.952	0.088	0	255	13.784	255	1		1
67	156.763	0.088	0	255	13.784	255	1		1
68	166.818	0.083	0	255	13.784	255	1		1
69	107.031	0.129	0	255	13.784	255	1	2	0.5
70	188.224	0.22	0	255	41.353	765	3		3
71	113.572	0.121	0	255	13.784	255	1		1
72	114.491	0.12	0	255	13.784	255	1		1
73	200.387	0.069	0	255	13.784	255	1		1
74	0.108	0	0	0	0	0	0		0
75	99.085	0.139	0	255	13.784	255	1		1
76	196.494	0.421	0	255	82.706	1530	6		6
77	137.141	0.302	0	255	41.353	765	3		3
78	102.923	0.134	0	255	13.784	255	1		1
79	148.709	0.278	0	255	41.353	765	3		3
80	141.844	0.194	0	255	27.569	510	2		2
81	183.089	0.075	0	255	13.784	255	1		1
82	138.925	0	0	0	0	0	0		0
83	396.232	0.035	0	255	13.784	255	1		1
84	328.824	0.252	0	255	82.706	1530	6	2	3
85	150.979	0.091	0	255	13.784	255	1		1
86	93.409	0.295	0	255	27.569	510	2		2
1	195.95	0.07	0	255	13.78	255	1		1
2	84.92	0.16	0	255	13.78	255	1		1
3	180.12	0.08	0	255	13.78	255	1		1
4	181.57	0.15	0	255	27.57	510	2		2
5	403.85	0.03	0	255	13.78	255	1		1
6	95.95	0.29	0	255	27.57	510	2		2
7	178.22	0.08	0	255	13.78	255	1		1
8	92.81	0.15	0	255	13.78	255	1		1
9	114.49	0.24	0	255	27.57	510	2		2
10	121.68	0.11	0	255	13.78	255	1		1
11	310.93	0.18	0	255	55.14	1020	4		4
12	202.33	0.14	0	255	27.57	510	2		2
13	309.74	0.04	0	255	13.78	255	1		1
14	119.36	0.35	0	255	41.35	765	3		3
15	216.98	0	0	0	0	0	0		0
16	109.63	0.13	0	255	13.78	255	1		1
17	205.58	0.2	0	255	41.35	765	3		3
18	215.74	0.06	0	255	13.78	255	1		1
19	246.66	0.06	0	255	13.78	255	1		1
20	103.19	0.13	0	255	13.78	255	1		1
21	174.44	0.08	0	255	13.78	255	1		1
22	159.3	0.09	0	255	13.78	255	1		1
23	133.52	0.1	0	255	13.78	255	1		1
24	200.55	0.07	0	255	13.78	255	1		1
25	216.71	0.13	0	255	27.57	510	2		2
26	93.19	0.15	0	255	13.78	255	1		1
27	231.96	0.24	0	255	55.14	1020	4		4
28	160.38	0.52	0	255	82.71	1530	6		6
29	102.87	0.13	0	255	13.78	255	1		1
30	120.6	0.11	0	255	13.78	255	1		1
31	190.22	0.14	0	255	27.57	510	2		2
32	227.2	0.12	0	255	27.57	510	2		2
33	283.63	0.05	0	255	13.78	255	1		1
34	215.14	0.13	0	255	27.57	510	2		2
35	114.6	0.12	0	255	13.78	255	1		1
36	275.36	0	0	0	0	0	0		0
37	194.49	0.07	0	255	13.78	255	1		1
38	143.41	0.19	0	255	27.57	510	2		2
39	115.46	0.12	0	255	13.78	255	1		1
40	146.38	0.09	0	255	13.78	255	1	2	0.5
41	185.74	0.07	0	255	13.78	255	1		1
42	159.57	0.17	0	255	27.57	510	2		2
43	223.09	0.06	0	255	13.78	255	1		1
44	176.44	0.08	0	255	13.78	255	1		1
45	155.84	0.09	0	255	13.78	255	1		1
46	128.87	0.11	0	255	13.78	255	1		1
47	145.74	0.09	0	255	13.78	255	1		1
48	200.12	0.07	0	255	13.78	255	1		1
49	148.6	0.09	0	255	13.78	255	1		1
50	81.95	0.17	0	255	13.78	255	1		1
51	142.65	0.39	0	255	55.14	1020	4		4
52	98.6	0.14	0	255	13.78	255	1		1
1	0.54	0	0	0	0	0	0		0
2	126.55	0	0	0	0	0	0		0
3	115.41	0	0	0	0	0	0		0
4	99.09	0.14	0	255	13.78	255	1		1
5	147.36	0	0	0	0	0	0		0
6	153.03	0	0	0	0	0	0	2	0
7	104	0	0	0	0	0	0		0
8	118.33	0.12	0	255	13.78	255	1		1
9	61.79	0	0	0	0	0	0		0
10	159.41	0.09	0	255	13.78	255	1		1
11	74.92	0.18	0	255	13.78	255	1		1
12	109.63	0.25	0	255	27.57	510	2		2
13	165.47	0.08	0	255	13.78	255	1		1
14	99.63	0	0	0	0	0	0		0
15	114.17	0.12	0	255	13.78	255	1		1
16	64.81	0	0	0	0	0	0		0
17	217.14	0	0	0	0	0	0		0
18	78.65	0.35	0	255	27.57	510	2		2
19	55.46	0	0	0	0	0	0		0
20	171.36	0	0	0	0	0	0		0
21	148.71	0.09	0	255	13.78	255	1		1
22	110.82	0	0	0	0	0	0		0
23	110.87	0.12	0	255	13.78	255	1		1
24	133.41	0.21	0	255	27.57	510	2		2
25	96.33	0.14	0	255	13.78	255	1		1
26	134.38	0	0	0	0	0	0		0
27	895.28	0.02	0	255	13.78	255	1		1
28	145.41	0.09	0	255	13.78	255	1		1
29	187.79	0.07	0	255	13.78	255	1		1
30	118.22	0.35	0	255	41.35	765	3		3
31	134.65	0.1	0	255	13.78	255	1		1
32	134.71	0.1	0	255	13.78	255	1		1
33	130.71	0	0	0	0	0	0		0
34	151.47	0.27	0	255	41.35	765	3		3
35	219.14	0.06	0	255	13.78	255	1		1
36	154.22	0.09	0	255	13.78	255	1		1
37	54.76	0.25	0	255	13.78	255	1		1
38	108.27	0.13	0	255	13.78	255	1		1
39	71.57	0.19	0	255	13.78	255	1		1
40	80.54	0.17	0	255	13.78	255	1		1
41	163.68	0.17	0	255	27.57	510	2		2
42	115.25	0.12	0	255	13.78	255	1		1
43	130.87	0	0	0	0	0	0		0
44	232.93	0.24	0	255	55.14	1020	4		4
45	130.65	0.11	0	255	13.78	255	1		1
46	178.22	0.08	0	255	13.78	255	1		1
47	267.15	0.05	0	255	13.78	255	1		1
48	64.6	0.21	0	255	13.78	255	1		1
49	129.03	0	0	0	0	0	0		0
50	95.03	0.15	0	255	13.78	255	1		1
51	181.09	0.15	0	255	27.57	510	2		2
52	158.6	0.09	0	255	13.78	255	1		1
53	125.03	0	0	0	0	0	0		0
54	131.41	0.1	0	255	13.78	255	1		1
55	138.28	0.1	0	255	13.78	255	1		1
56	177.63	0.08	0	255	13.78	255	1		1
57	77.68	0.35	0	255	27.57	510	2		2
58	134.92	0.1	0	255	13.78	255	1		1
59	146.6	0.09	0	255	13.78	255	1		1
60	218.55	0.19	0	255	41.35	765	3		3
61	130.76	0.21	0	255	27.57	510	2		2
62	101.3	0.27	0	255	27.57	510	2		2
63	216.22	0.26	0	255	55.14	1020	4		4
64	142.44	0.1	0	255	13.78	255	1		1
65	121.73	0.23	0	255	27.57	510	2		2
66	103.41	0.27	0	255	27.57	510	2		2
67	164.66	0.17	0	255	27.57	510	2		2
68	98.38	0.14	0	255	13.78	255	1		1
69	51.95	0	0	0	0	0	0		0
70	116.27	0.12	0	255	13.78	255	1		1
71	133.03	0.1	0	255	13.78	255	1		1
72	165.9	0.08	0	255	13.78	255	1		1
73	91.68	0.45	0	255	41.35	765	3	4	0.75
74	100.17	0.14	0	255	13.78	255	1		1
75	55.08	0.25	0	255	13.78	255	1		1
76	130.06	0.11	0	255	13.78	255	1		1
77	184.39	0.07	0	255	13.78	255	1		1
78	194.82	0.07	0	255	13.78	255	1		1
79	129.14	0	0	0	0	0	0		0
80	155.52	0	0	0	0	0	0		0
81	168.82	0.08	0	255	13.78	255	1		1
82	110.06	0.13	0	255	13.78	255	1		1
83	128.55	0.11	0	255	13.78	255	1		1
84	172.82	0.08	0	255	13.78	255	1		1
85	127.03	0.22	0	255	27.57	510	2		2
86	129.84	0.11	0	255	13.78	255	1		1
87	119.57	0.46	0	255	55.14	1020	4		4
88	0.59	0	0	0	0	0	0		0
89	150.87	0.09	0	255	13.78	255	1		1
90	202.01	0	0	0	0	0	0		0
91	115.52	0.36	0	255	41.35	765	3		3
92	149.74	0.09	0	255	13.78	255	1		1
93	151.84	0.09	0	255	13.78	255	1		1
94	81.73	0.17	0	255	13.78	255	1		1
95	100.71	0.14	0	255	13.78	255	1		1
96	159.2	0.09	0	255	13.78	255	1		1
97	70.6	0.39	0	255	27.57	510	2		2
98	169.09	0	0	0	0	0	0		0
99	3.78	0	0	0	0	0	0		0
100	67.41	0.2	0	255	13.78	255	1		1
101	115.46	0.12	0	255	13.78	255	1		1
102	128.76	0.21	0	255	27.57	510	2		2
103	183.68	0.08	0	255	13.78	255	1		1
104	145.03	0.1	0	255	13.78	255	1		1
105	120.33	0	0	0	0	0	0		0
106	85.41	0.16	0	255	13.78	255	1		1
107	61.57	0.22	0	255	13.78	255	1		1
108	49.95	0.55	0	255	27.57	510	2		2
109	162.93	0.08	0	255	13.78	255	1		1
110	147.25	0	0	0	0	0	0		0
111	76.27	0	0	0	0	0	0		0
112	43.35	0	0	0	0	0	0		0
113	67.46	0.41	0	255	27.57	510	2		2
114	56.65	0	0	0	0	0	0		0
115	157.57	0.09	0	255	13.78	255	1		1
116	152.28	0	0	0	0	0	0		0
117	91.84	0	0	0	0	0	0		0

## Sheet: SCR NT exp1
	Area	Mean	Min	Max	IntDen	RawIntDen	53BP1 Foci number	Nuclei	53BP1/nuclei
1	76.54	0.18	0	255	13.78	255	1
2	111.68	0.12	0	255	13.78	255	1
3	78.44	0	0	0	0	0	0
4	75.25	0.18	0	255	13.78	255	1
5	112.38	0.12	0	255	13.78	255	1
6	72	0	0	0	0	0	0
7	92.92	0	0	0	0	0	0
8	87.19	0.16	0	255	13.78	255	1
9	123.41	0.11	0	255	13.78	255	1
10	87.08	0.16	0	255	13.78	255	1
11	122.76	0.11	0	255	13.78	255	1
12	78.22	0.18	0	255	13.78	255	1
13	101.84	0.14	0	255	13.78	255	1
14	129.41	0	0	0	0	0	0
15	87.73	0	0	0	0	0	0
16	116.92	0.12	0	255	13.78	255	1
17	182.87	0.08	0	255	13.78	255	1
18	121.41	0.11	0	255	13.78	255	1
19	255.42	0.05	0	255	13.78	255	1
20	83.19	0.33	0	255	27.57	510	2
21	106	0.13	0	255	13.78	255	1
22	156.66	0.18	0	255	27.57	510	2
23	107.95	0.13	0	255	13.78	255	1
24	109.68	0	0	0	0	0	0
25	145.57	0.09	0	255	13.78	255	1
26	102.38	0	0	0	0	0	0
27	89.19	0.46	0	255	41.35	765	3
28	78.98	0.35	0	255	27.57	510	2
29	145.3	0.09	0	255	13.78	255	1
30	122.49	0	0	0	0	0	0
31	92.22	0.15	0	255	13.78	255	1
32	152.49	0.09	0	255	13.78	255	1
33	145.25	0	0	0	0	0	0
34	95.52	0.43	0	255	41.35	765	3
35	96.11	0	0	0	0	0	0
36	92.49	0.15	0	255	13.78	255	1
37	77.62	0.18	0	255	13.78	255	1
38	117.79	0.12	0	255	13.78	255	1
39	81.68	0.17	0	255	13.78	255	1
40	123.19	0	0	0	0	0	0
41	124.82	0.22	0	255	27.57	510	2
42	124.98	0	0	0	0	0	0
43	91.84	0.3	0	255	27.57	510	2
44	78.98	0.17	0	255	13.78	255	1
45	105.14	0.39	0	255	41.35	765	3
46	99.68	0.14	0	255	13.78	255	1
47	153.68	0.09	0	255	13.78	255	1
48	104.22	0.4	0	255	41.35	765	3
49	94.92	0.29	0	255	27.57	510	2
50	112.76	0.12	0	255	13.78	255	1
51	68.71	0.2	0	255	13.78	255	1
52	94.33	0	0	0	0	0	0
53	96.06	0.14	0	255	13.78	255	1
1	105.09	0.13	0	255	13.78	255	1
2	74.49	0.37	0	255	27.57	510	2
3	76.6	0.18	0	255	13.78	255	1
4	123.9	0.11	0	255	13.78	255	1
5	126.49	0.44	0	255	55.14	510	2
6	83.03	0.17	0	255	13.78	255	1
7	71.95	0.19	0	255	13.78	255	1
8	75.08	0.18	0	255	13.78	255	1
9	117.73	0.23	0	255	27.57	510	2
10	232.98	0.12	0	255	27.57	510	2
11	127.79	0.11	0	255	13.78	255	1
12	78.06	0.35	0	255	27.57	510	2
13	69.79	0.2	0	255	13.78	255	1
14	137.95	0.1	0	255	13.78	255	1
15	84.71	0.16	0	255	13.78	255	1
16	123.09	0.22	0	255	27.57	510	2
17	73.62	0.56	0	0	0	0	0
18	236.87	0.06	0	255	13.78	255	1
19	74	0.37	0	255	27.57	510	2
20	70.27	0.2	0	255	13.78	255	1
21	67.79	0.61	0	255	41.35	765	3
22	77.03	0.18	0	255	13.78	255	1
23	83.14	0.33	0	255	27.57	510	2
24	70.71	0.19	0	255	13.78	255	1
25	88.33	0.16	0	255	13.78	255	1
26	87.95	0.16	0	255	13.78	255	1
27	179.41	0.15	0	255	27.57	510	2
28	64.81	0.64	0	255	41.35	765	3
29	112.17	0.12	0	255	13.78	255	1
30	59.14	0.47	0	255	27.57	510	2
31	53.35	0.52	0	255	27.57	510	2
32	125.25	0.11	0	255	13.78	255	1
33	64.44	0.43	0	255	27.57	510	2
34	75.25	0.18	0	255	13.78	255	1
35	71.57	0.19	0	255	13.78	255	1
36	99.19	0.14	0	0	0	0	0
37	94.98	0.29	0	0	0	0	0
38	82.06	0.17	0	255	13.78	255	1
39	81.62	0.17	0	255	13.78	255	1
40	61.62	0.22	0	255	13.78	255	1
41	62.11	0.22	0	255	13.78	255	1
42	67.03	0.41	0	255	27.57	510	2
43	166.01	0.08	0	255	13.78	255	1
1	115.84	0.12	0	255	13.78	255	1
2	149.9	0.09	0	255	13.78	255	1
3	86.27	0.16	0	255	13.78	255	1
4	115.63	0.12	0	255	13.78	255	1
5	84.92	0.16	0	255	13.78	255	1
6	146.71	0.19	0	255	27.57	510	2
7	107.25	0.13	0	255	13.78	255	1
8	106.06	0.13	0	255	13.78	255	1
9	78.81	0.17	0	255	13.78	255	1
10	83.68	0.16	0	0	0	0	0
11	138.01	0.2	0	255	27.57	510	2
12	156.33	0.09	0	255	13.78	255	1
13	84.81	0.16	0	255	13.78	255	1
14	121.46	0.11	0	255	13.78	255	1
15	83.14	0.33	0	255	27.57	510	2
16	106.92	0.13	0	255	13.78	255	1
17	74.76	0.37	0	255	27.57	510	2
18	83.35	0.17	0	255	13.78	255	1
19	95.95	0.29	0	255	27.57	510	2
20	93.84	0.15	0	255	13.78	255	1
21	97.52	0.14	0	255	13.78	255	1
22	76.27	0.36	0	255	27.57	510	2
23	77.79	0.35	0	255	27.57	510	2
24	71.25	0.19	0	255	13.78	255	1
25	70.81	0.58	0	255	41.35	765	3
26	98.87	0.42	0	255	41.35	765	3
27	80.44	0.17	0	255	13.78	255	1
28	76.38	0.36	0	255	27.57	510	2
29	158.98	0.17	0	255	27.57	510	2
30	69.95	0.99	0	255	68.92	510	2
31	89.46	0.46	0	255	41.35	765	3
32	152.01	1.18	0	255	179.2	255	1
33	108.6	0.25	0	255	27.57	510	2
34	98.98	0.28	0	255	27.57	510	2
35	127.3	0.43	0	255	55.14	255	1
36	100.87	0.27	0	255	27.57	510	2
37	99.95	0.14	0	255	13.78	255	1
38	87.68	0.16	0	255	13.78	255	1
39	122.65	0.34	0	255	41.35	765	3
40	76.27	0.18	0	255	13.78	255	1
41	92.76	0.3	0	0	0	0	0
42	114.49	0.48	0	255	55.14	510	2
43	87.73	0.16	0	255	13.78	255	1
44	121.73	0.45	0	255	55.14	255	1
45	136.92	0.4	0	255	55.14	255	1
46	109.14	0.13	0	255	13.78	255	1
47	74.76	0.18	0	255	13.78	255	1
48	81.57	0.17	0	255	13.78	255	1
49	43.95	0	0	0	0	0	0
50	65.89	0.21	0	255	13.78	255	1

## Sheet: summary
Binucleadas	Multin	Mobo
1	1	1
0.5	1	0
1.5	5	0
2	1	0
0.5	1	1
3	5	0
0.5	2	0
0.5	0.2	1
0.5	1	0
1.5	1.16667	0
0.5	1.75	1
2	1	0
1	0.75	2
0.5	0.666667	1
0.5	0.4	2
1.5	0.166667	0
0	0.5	0
1	0.642857	2
0	0.75	0
0.5	1	1
0	0.25	0
1.5	2.2	4
2	0.5	0
2.5	1.25	0
1	0	1
1.5	0.166667	0
0		1
0		1
1.5		0
1		1
0.5		1
2		1
0.5		1
1.5		2
4.5		1
1.5		0
2.5		2
1		1
1.5		1
1.5		2
1		1
0.5		3
0		2
0.5		2
2		1
0.5		1
1.5		1
0.5		1
1		2
1.5		1
1.5		1
0.5		2
1		1
1		2
5		2
0.5		1
6.5		1
0.5		2
2		1
1		1
1.5		0
		0
		1
		2
		1
		3
		1
		1
		1
		1
		1
		2
		2
		1
		1
		1
		1
		2
		1
		1
		1
		1
		1
		1
		1
		1
		1
		0
		1
		0
		1
		1
		2
		2
		3
		1
		1
		2
		3
		1
		4
		1
		1
		1
		1
		0
		4
		1
		3
		1
		1
		2
		1
		1
		0
		1
		1
		1
		1
		2
		0
		0
		1
		1
		1
		0
		0
		1
		1
		0
		0
		1
		1
		1
		1
		1
		1
		1
		1
		0
		1
		1
		1
		1
		1
		1
		1
		1
		1
		0
		1
		0
		1
		1
		1
		3
		1
		4
		1
		2
		1
		1
		6
		0
		1
		1
		1
		1
		1
		1
		0
		0
		1
		1
		1
		0
		4
		1
		1
		1
		3
		1
		2
		1
		1
		2
		1
		1
		1
		2
		3
		4
		1
		2
		0
		2
		6
		1
		1
		1
		6
		0
		1
		1
		0
		3
		1
		1
		1
		2
		1

## Sheet: BRCA2 Fasudil exp2
HCT116
53BP1
	Area	Mean	Min	Max	IntDen	RawIntDen	53BP1 Foci number	Nuclei	53BP1/nuclei
1	281.04	0.15	0	255	41.35	765	0	2	0
2	120.82	0.23	0	255	27.57	510	2		2
3	71.3	0.19	0	255	13.78	255	1		1
4	73.41	0.19	0	255	13.78	255	1		1
5	569.81	0.17	0	255	96.49	1785	7	4	1.75
6	121.57	0.23	0	255	27.57	510	2		2
7	83.57	0.66	0	255	55.14	1020	4		4
8	162.71	0.34	0	255	55.14	1020	4		4
9	213.52	0.19	0	255	41.35	765	3	2	1.5
10	67.73	0.61	0	255	41.35	765	3		3
11	86.22	1.12	0	255	96.49	1785	7		7
12	152.71	0.09	0	255	13.78	255	1		1
13	94.76	0.87	0	255	82.71	1530	6		6
14	128.17	0.32	0	255	41.35	765	3		3
15	76.65	0.36	0	255	27.57	510	2		2
16	149.63	0.09	0	255	13.78	255	1		1
17	117.73	0.59	0	255	68.92	1275	5		5
18	134.6	1.23	0	255	165.41	3060	12		12
19	68.49	1.01	0	255	68.92	1275	5		5
20	134.49	0.31	0	255	41.35	765	3		3
21	50.65	1.91	0	255	96.49	1785	7		7
22	209.68	0.39	0	255	82.71	1530	6	2	3
23	302.39	0.14	0	255	41.35	765	3		3
24	106.06	0.26	0	255	27.57	510	2		2
25	83.3	0.17	0	255	13.78	255	1		1
26	101.03	0.41	0	255	41.35	765	3		3
27	136.28	0.1	0	255	13.78	255	1		1
28	75.57	0.55	0	255	41.35	765	3		3
29	73.57	0.75	0	255	55.14	1020	4		4
30	70.6	0.59	0	255	41.35	765	3		3
31	45.03	0.31	0	255	13.78	255	1		1
1	110.98	0.12	0	255	13.78	255	1		1
2	122.11	0.11	0	255	13.78	255	1		1
3	120.22	0.11	0	255	13.78	255	1		1
4	91.14	0.45	0	255	41.35	765	3		3
5	159.36	0.17	0	255	27.57	510	2		2
6	137.9	0.5	0	255	68.92	1275	5		5
7	69.79	0.2	0	255	13.78	255	1		1
8	114.76	0.24	0	255	27.57	510	2		2
9	79.46	0.17	0	255	13.78	255	1		1
10	126.92	0.11	0	255	13.78	255	1		1
11	79.52	0.17	0	255	13.78	255	1		1
12	77.25	0.18	0	255	13.78	255	1		1
13	96.33	0.29	0	255	27.57	510	2		2
14	132.01	0.31	0	255	41.35	765	3		3
15	64.11	0.22	0	255	13.78	255	1		1
16	111.19	0.37	0	255	41.35	765	3		3
17	82.92	0.5	0	255	41.35	765	3		3
18	84.11	0.49	0	255	41.35	765	3		3
19	145.36	0.19	0	255	27.57	510	2		2
20	92.22	0.45	0	255	41.35	765	3		3
21	66.44	0.41	0	255	27.57	510	2		2
22	348.5	0.12	0	255	41.35	765	3	3	1
23	221.2	0.93	0	255	206.77	3825	15	4	3.75
24	75.52	0.91	0	255	68.92	1275	5		5
25	70.44	0.2	0	255	13.78	255	1		1
26	154.06	0.09	0	255	13.78	255	1		1
27	53.89	1.79	0	255	96.49	1785	7		7
28	56.16	0.49	0	255	27.57	510	2		2
29	164.66	0.08	0	255	13.78	255	1		1
30	147.3	0.28	0	255	41.35	765	3		3
1	108.6	0.13	0	255	13.78	255	1		1
2	91.52	0	0	0	0	0	#DIV/0!		0
3	154.01	0.09	0	255	13.78	255	1		1
4	181.57	0	0	0	0	0	#DIV/0!		0
5	164.22	0.08	0	255	13.78	255	1		1
6	211.04	0.07	0	255	13.78	255	1		1
7	317.8	0.17	0	255	55.14	1020	4		4
8	48.6	0.28	0	255	13.78	255	1		1
9	168.98	0.33	0	255	55.14	1020	4		4
10	903.98	0.18	0	255	165.41	3060	12	8	1.5
11	450.88	0.03	0	255	13.78	255	1	5	0.2
12	172.01	0	0	0	0	0	#DIV/0!		0
13	367.42	0.15	0	255	55.14	1020	4		4
14	396.18	0.35	0	255	137.84	2550	10	6	1.66667
15	181.14	0.23	0	255	41.35	765	3		3
16	194.82	0.28	0	255	55.14	1020	4		4
1	123.41	0.11	0	255	13.78	255	1		1
2	86.81	0	0	0	0	0	#DIV/0!		0
3	132.82	0.21	0	255	27.57	510	2		2
4	215.63	0.06	0	255	13.78	255	1		1
5	101.36	0.14	0	255	13.78	255	1		1
6	99.46	0	0	0	0	0	#DIV/0!		0
7	232.44	0.06	0	255	13.78	255	1		1
8	110.55	0.12	0	255	13.78	255	1		1
9	226.77	0.18	0	255	41.35	765	3	2	1.5
10	124.06	0.11	0	255	13.78	255	1		1
11	94.81	0.15	0	255	13.78	255	1		1
12	98.27	0.7	0	255	68.92	1275	5		5
13	115.46	0.24	0	255	27.57	510	2		2
14	98.65	0	0	0	0	0	#DIV/0!		0
15	107.03	0.13	0	255	13.78	255	1		1
16	168.44	0.08	0	255	13.78	255	1		1
17	106.33	0.13	0	255	13.78	255	1		1
18	162.44	0.08	0	255	13.78	255	1		1
19	105.68	0.13	0	255	13.78	255	1		1
20	132.49	0	0	0	0	0	#DIV/0!		0
21	188.98	0.44	0	255	82.71	1530	6		6
22	131.95	0.1	0	255	13.78	255	1		1
23	96.92	0.14	0	255	13.78	255	1		1
24	123.84	0.11	0	255	13.78	255	1		1
25	103.25	0.27	0	255	27.57	510	2		2
26	163.03	0	0	0	0	0	#DIV/0!		0
27	201.36	0	0	0	0	0	#DIV/0!		0
28	135.36	0.1	0	255	13.78	255	1		1
29	153.25	0.27	0	255	41.35	765	3		3
30	147.84	0.19	0	255	27.57	510	2		2
31	139.9	0.1	0	255	13.78	255	1		1
32	137.84	0.1	0	255	13.78	255	1		1
33	132.71	0.1	0	255	13.78	255	1		1
34	91.52	0.15	0	255	13.78	255	1		1
35	490.13	0.06	0	255	27.57	510	2	3	0.666667
36	155.3	0.09	0	255	13.78	255	1		1
1	395.04	0.03	0	255	13.78	255	1		1
2	303.69	0.05	0	255	13.78	255	1		1
3	277.74	0.05	0	255	13.78	255	1		1
4	79.25	0.17	0	255	13.78	255	1		1
5	90.98	0	0	0	0	0	#DIV/0!		0
6	165.09	0.17	0	255	27.57	510	2		2
7	152.82	0.09	0	255	13.78	255	1		1
8	164.55	0	0	0	0	0	#DIV/0!		0
9	160.22	0.17	0	255	27.57	510	2		2
10	155.63	0	0	0	0	0	#DIV/0!		0
11	222.82	0.12	0	255	27.57	510	2		2
12	276.61	0	0	0	0	0	#DIV/0!		0
13	111.03	0.12	0	255	13.78	255	1		1
14	167.84	0.08	0	255	13.78	255	1		1
15	163.36	0	0	0	0	0	#DIV/0!		0
16	102.71	0.13	0	255	13.78	255	1		1
17	74.71	0.18	0	255	13.78	255	1		1
18	184.55	0.07	0	255	13.78	255	1		1
19	87.35	0.47	0	255	41.35	765	3		3
20	104.76	0.13	0	255	13.78	255	1		1
21	100.6	0.69	0	255	68.92	1275	5		5
22	177.25	0.08	0	255	13.78	255	1		1
23	96.06	0.14	0	255	13.78	255	1		1
24	109.14	0	0	0	0	0	0		0
25	72.76	0.57	0	255	41.35	765	3		3
26	104.44	0.26	0	255	27.57	510	2		2
27	120.82	0.11	0	255	13.78	255	1		1
28	142.82	0.19	0	255	27.57	510	2		2
29	94.81	0.15	0	255	13.78	255	1		1
30	143.2	0.58	0	255	82.71	1530	6		6
31	129.68	0.11	0	255	13.78	255	1		1
32	780.57	0.04	0	255	27.57	510	2	3	0.666667
33	259.69	0.05	0	255	13.78	255	1		1
34	85.25	0.81	0	255	68.92	1275	5		5
35	179.3	0	0	0	0	0	0		0
36	168.98	0.08	0	255	13.78	255	1		1
37	152.11	0	0	0	0	0	0		0
38	77.19	0.18	0	255	13.78	255	1		1
39	183.79	0.07	0	255	13.78	255	1		1
40	92.98	0.15	0	255	13.78	255	1		1
41	151.2	0.09	0	255	13.78	255	1		1
42	105.73	0.26	0	255	27.57	510	2		2
43	87.14	0.16	0	255	13.78	255	1		1
44	185.47	0.15	0	255	27.57	510	2	2	1
45	153.03	0.09	0	255	13.78	255	1		1
46	109.95	0.25	0	255	27.57	510	2		2
47	157.63	0.09	0	255	13.78	255	1		1
48	92.17	0	0	0	0	0	0		0
49	140.55	0	0	0	0	0	0		0
50	107.14	0.13	0	255	13.78	255	1		1
51	140.11	0	0	0	0	0	0		0
52	145.9	0	0	0	0	0	0		0
53	93.84	0.15	0	255	13.78	255	1		1
1	99.41	0.28	0	255	27.57	510	2		2
2	167.68	0.08	0	255	13.78	255	1		1
3	115.9	0.12	0	255	13.78	255	1		1
4	162.87	0.08	0	255	13.78	255	1		1
5	66.33	0.21	0	255	13.78	255	1		1
6	147.52	0.19	0	255	27.57	510	2		2
7	147.79	0.19	0	255	27.57	510	2		2
8	246.5	0.22	0	255	55.14	1020	4	2	2
9	112.49	0.12	0	255	13.78	255	1		1
10	211.85	0.2	0	255	41.35	765	3		3
11	189.63	0.15	0	255	27.57	510	2	2	1
12	133.14	0.1	0	255	13.78	255	1		1
13	38.54	0	0	0	0	0	0		0
14	319.15	0.04	0	255	13.78	255	1	2	0.5
15	45.19	0.31	0	255	13.78	255	1		1
16	58.76	0.23	0	255	13.78	255	1		1
17	1303.35	0.04	0	255	55.14	1020	4	4	1
18	144.17	0.38	0	255	55.14	1020	4		4
19	96.49	0.29	0	255	27.57	510	2		2
20	136.44	0.2	0	255	27.57	510	2		2
21	125.9	0.44	0	255	55.14	1020	4		4
22	134.22	0.41	0	255	55.14	1020	4		4
23	101.73	0.27	0	255	27.57	510	2		2
24	38.11	0.36	0	255	13.78	255	1		1
25	181.74	0.15	0	255	27.57	510	2		2
26	137.74	0.1	0	255	13.78	255	1		1

## Sheet: BRCA2 NTexp2
	Area	Mean	Min	Max	IntDen	RawIntDen	53BP1 Foci number	Nuclei	53BP1/nuclei
1	102.87	0.13	0	255	13.78	255	1		1
2	144.71	0.1	0	255	13.78	255	1		1
3	193.36	0.07	0	255	13.78	255	1	2	0.5
4	344.07	0.08	0	255	27.57	510	2	2	1
5	138.38	0.1	0	255	13.78	255	1		1
6	102.54	0.13	0	255	13.78	255	1		1
7	143.9	0.19	0	255	27.57	510	2		2
8	113.14	0.12	0	255	13.78	255	1		1
9	95.63	0.14	0	255	13.78	255	1		1
10	150.38	0.09	0	255	13.78	255	1		1
11	192.22	0.14	0	255	27.57	510	2		2
12	165.09	0.17	0	255	27.57	510	2		2
13	109.95	0.25	0	255	27.57	510	2		2
14	137.09	0.5	0	255	68.92	1275	5		5
15	80.54	0.17	0	255	13.78	255	1		1
16	124.98	0.11	0	255	13.78	255	1		1
17	118.76	0.12	0	255	13.78	255	1		1
18	178.33	0.23	0	255	41.35	765	3		3
19	115.73	0	0	0	0	0	#DIV/0!		0
20	167.36	0.33	0	255	55.14	1020	4		4
21	125.14	0.22	0	255	27.57	510	2		2
22	90.44	0.15	0	255	13.78	255	1		1
23	120.87	0	0	0	0	0	#DIV/0!		0
24	113.36	0.24	0	255	27.57	510	2		2
25	111.95	0.25	0	255	27.57	510	2		2
26	117.57	0.23	0	255	27.57	510	2		2
27	164.06	0.08	0	255	13.78	255	1		1
28	81.03	0.17	0	255	13.78	255	1		1
29	137.09	0.2	0	255	27.57	510	2		2
30	87.46	0.16	0	255	13.78	255	1		1
31	102.06	0.27	0	255	27.57	510	2		2
32	112.11	0.12	0	255	13.78	255	1		1
33	168.76	0.16	0	255	27.57	510	2		2
34	129.57	0.32	0	255	41.35	765	3		3
35	199.41	0.07	0	255	13.78	255	1		1
36	97.36	0.14	0	255	13.78	255	1		1
37	113.79	0.12	0	255	13.78	255	1		1
38	113.36	0.24	0	255	27.57	510	2		2
39	122.87	0.11	0	255	13.78	255	1		1
40	134.92	0.2	0	255	27.57	510	2		2
41	105.73	0.13	0	255	13.78	255	1		1
42	113.9	0	0	0	0	0	#DIV/0!		0
43	124.65	0.11	0	255	13.78	255	1		1
44	107.19	0.13	0	255	13.78	255	1		1
45	122.28	0.11	0	255	13.78	255	1		1
46	118.71	0.12	0	255	13.78	255	1		1
47	74.17	0.37	0	255	27.57	510	2		2
48	136.98	0.1	0	255	13.78	255	1		1
49	116.55	0.24	0	255	27.57	510	2		2
50	112.65	0.12	0	255	13.78	255	1		1
51	134.6	0.1	0	255	13.78	255	1		1
52	60.65	0.23	0	255	13.78	255	1		1
53	0.59	0	0	0	0	0	#DIV/0!		0
54	102.11	0.27	0	255	27.57	510	2		2
55	98.06	0.14	0	255	13.78	255	1		1
56	109.25	0.13	0	255	13.78	255	1		1
57	105.63	0	0	0	0	0	#DIV/0!		0
58	107.41	0.39	0	255	41.35	765	3		3
59	101.73	0.14	0	255	13.78	255	1		1
60	95.36	0.29	0	255	27.57	510	2		2
61	181.68	0.08	0	255	13.78	255	1		1
62	87.08	0.32	0	255	27.57	510	2		2
63	166.98	0.08	0	255	13.78	255	1		1
64	128.6	0.43	0	255	55.14	1020	4		4
65	109.52	0.13	0	255	13.78	255	1		1
66	158.87	0.09	0	255	13.78	255	1		1
67	74.98	0	0	0	0	0	#DIV/0!		0
68	95.9	0.14	0	255	13.78	255	1		1
69	94.6	0.15	0	255	13.78	255	1		1
70	163.14	0.08	0	255	13.78	255	1		1
71	77.3	0.18	0	255	13.78	255	1		1
72	153.36	0.09	0	255	13.78	255	1		1
73	187.9	0	0	0	0	0	#DIV/0!		0
74	134.76	0	0	0	0	0	#DIV/0!		0
75	70.33	0.39	0	255	27.57	510	2		2
76	77.25	0.18	0	255	13.78	255	1		1
77	140.6	0	0	0	0	0	#DIV/0!		0
78	161.41	0.09	0	255	13.78	255	1		1
79	94.06	0.15	0	255	13.78	255	1		1
80	87.52	0.16	0	255	13.78	255	1		1
81	169.2	0.16	0	255	27.57	510	2		2
82	112.76	0	0	0	0	0	#DIV/0!		0
83	129.09	0.11	0	255	13.78	255	1		1
84	120.6	0	0	0	0	0	#DIV/0!		0
85	110.6	0.12	0	255	13.78	255	1		1
86	84.27	0	0	0	0	0	#DIV/0!		0
1	91.73	0.15	0	255	13.78	255	1		1
2	107.9	0.13	0	255	13.78	255	1		1
3	114	0.12	0	255	13.78	255	1		1
4	125.68	0.44	0	255	55.14	1020	4		4
5	93.14	0	0	0	0	0	#DIV/0!		0
6	173.68	0.24	0	255	41.35	765	3		3
7	117.14	0	0	0	0	0	#DIV/0!		0
8	168.49	0.08	0	255	13.78	255	1		1
9	88.49	0.31	0	255	27.57	510	2		2
10	90.17	0	0	0	0	0	#DIV/0!		0
11	115.09	0.36	0	255	41.35	765	3		3
12	116.49	0	0	0	0	0	#DIV/0!		0
13	120.76	0.23	0	255	27.57	510	2		2
14	102.92	0.13	0	255	13.78	255	1		1
15	150.65	0.09	0	255	13.78	255	1		1
16	109.36	0.13	0	255	13.78	255	1		1
17	158.11	0.26	0	255	41.35	765	3		3
18	117.19	0.12	0	255	13.78	255	1		1
19	114.98	0.12	0	255	13.78	255	1		1
20	151.84	0.18	0	255	27.57	510	2		2
21	158.87	0.43	0	255	68.92	1275	5		5
22	100.44	0.14	0	255	13.78	255	1		1
23	173.57	0.08	0	255	13.78	255	1		1
24	110.76	0	0	0	0	0	#DIV/0!		0
25	126.33	0.22	0	255	27.57	510	2		2
26	109.14	0.13	0	255	13.78	255	1		1
27	74.6	0.18	0	255	13.78	255	1		1
28	109.19	0.13	0	255	13.78	255	1		1
29	115.95	0.12	0	255	13.78	255	1		1
30	78.71	0.18	0	255	13.78	255	1		1
31	110.76	0	0	0	0	0	#DIV/0!		0
32	206.98	0.07	0	255	13.78	255	1		1
33	140.28	0.2	0	255	27.57	510	2		2
34	128.38	0.21	0	255	27.57	510	2		2
35	121.03	0.11	0	255	13.78	255	1		1
36	142.33	0.1	0	255	13.78	255	1		1
37	69.84	0.2	0	255	13.78	255	1		1
38	118.49	0.12	0	255	13.78	255	1		1
39	128.55	0.11	0	255	13.78	255	1		1
40	144.11	0.19	0	255	27.57	510	2		2
41	80.81	0.17	0	255	13.78	255	1		1
42	112.17	0	0	0	0	0	#DIV/0!		0
43	115.9	0.24	0	255	27.57	510	2		2
44	113.41	0.12	0	255	13.78	255	1		1
45	89.35	0.15	0	255	13.78	255	1		1
46	1265.24	0.14	0	255	179.2	3315	13	6	2.16667
47	70.71	0.19	0	255	13.78	255	1		1
48	155.74	0.18	0	255	27.57	510	2		2
49	207.31	0.13	0	255	27.57	510	2		2
50	153.25	0.09	0	255	13.78	255	1		1
51	156.98	0.61	0	255	96.49	1785	7		7
52	112.71	0.12	0	255	13.78	255	1		1
53	150.22	0	0	0	0	0	#DIV/0!		0
54	169.03	0.24	0	255	41.35	765	3		3
55	92.65	0.45	0	255	41.35	765	3		3
56	160.55	0.26	0	255	41.35	765	3		3
57	101.41	0.27	0	255	27.57	510	2		2
58	98.65	0.14	0	255	13.78	255	1		1
59	81.62	0.51	0	255	41.35	765	3		3
60	86.17	0.16	0	255	13.78	255	1		1
61	166.11	0.25	0	255	41.35	765	3		3
62	123.79	0.11	0	255	13.78	255	1		1
63	149.63	0.18	0	255	27.57	510	2		2
64	106.22	0.13	0	255	13.78	255	1		1
65	92.54	0.3	0	255	27.57	510	2		2
66	127.41	0.11	0	255	13.78	255	1		1
67	110	0.25	0	255	27.57	510	2		2
68	90.98	0.15	0	255	13.78	255	1		1
69	117.19	0.12	0	255	13.78	255	1		1
70	190.93	0.22	0	255	41.35	765	3		3
71	81.79	0.17	0	255	13.78	255	1		1
72	114.6	0.24	0	255	27.57	510	2		2
73	67.19	0.21	0	255	13.78	255	1		1
74	145.74	0.38	0	255	55.14	1020	4		4
75	75.89	0.18	0	255	13.78	255	1		1
76	104.49	0.13	0	255	13.78	255	1		1
77	179.03	0.15	0	255	27.57	510	2		2
78	336.93	0.41	0	255	137.84	2550	10	2	5
79	80.06	0.17	0	255	13.78	255	1		1
80	171.57	0.16	0	255	27.57	510	2		2
81	112.87	0.12	0	255	13.78	255	1		1
82	133.79	0.21	0	255	27.57	510	2		2
83	83.46	0.33	0	255	27.57	510	2		2
84	129.36	0.11	0	255	13.78	255	1		1
85	119.19	0.12	0	255	13.78	255	1	2	0.5
86	0.11	0	0	0	0	0	#DIV/0!		0
87	150.82	0.09	0	255	13.78	255	1		1
88	189.9	0.73	0	255	137.84	2550	10		10
89	108.11	0.13	0	255	13.78	255	1		1
90	120.92	0.23	0	255	27.57	510	2		2
91	117.63	0	0	0	0	0	#DIV/0!		0
92	124.33	0	0	0	0	0	#DIV/0!		0
93	100.06	0.14	0	255	13.78	255	1		1
94	113.73	0.36	0	255	41.35	765	3		3
95	140.98	0.2	0	255	27.57	510	2		2
96	82.98	0.17	0	255	13.78	255	1		1
97	99.19	0.14	0	255	13.78	255	1		1
98	140.28	0.1	0	255	13.78	255	1		1
99	110.17	0.13	0	255	13.78	255	1		1
100	120	0.23	0	255	27.57	510	2		2
101	107.25	0.26	0	255	27.57	510	2		2
102	97.52	0.14	0	255	13.78	255	1		1
1	113.3	0.12	0	255	13.78	255	1
2	142.82	0	0	0	0	0	#DIV/0!		0
3	130.92	0.11	0	255	13.78	255	1		1
4	138.65	0.3	0	255	41.35	765	3		3
5	112.38	0.37	0	255	41.35	765	3		3
6	316.99	0.13	0	255	41.35	765	3		3
7	143.03	0.39	0	255	55.14	1020	4		4
8	123.46	0.22	0	255	27.57	510	2		2
9	117.79	0.12	0	255	13.78	255	1		1
10	151.95	0.09	0	255	13.78	255	1		1
11	156.44	0.09	0	255	13.78	255	1		1
12	290.17	0.05	0	255	13.78	255	1		1
13	144.71	0.57	0	255	82.71	1530	6		6
14	144.76	0.1	0	255	13.78	255	1		1
15	139.74	0.1	0	255	13.78	255	1		1
16	130.01	0.11	0	255	13.78	255	1		1
17	138.92	0.1	0	255	13.78	255	1		1
18	194.12	0.28	0	255	55.14	1020	4		4
19	148.06	0.09	0	255	13.78	255	1		1
20	138.44	0.2	0	255	27.57	510	2		2
21	114.38	0.12	0	255	13.78	255	1		1
22	118.22	0.12	0	255	13.78	255	1		1
23	150.82	0.09	0	255	13.78	255	1		1
24	104.82	0.13	0	255	13.78	255	1		1
25	203.79	0.41	0	255	82.71	1530	6		6
26	195.14	0.14	0	255	27.57	510	2		2
27	135.41	0.2	0	255	27.57	510	2		2
28	188.44	0.66	0	255	124.06	2295	9		9
29	145.03	0	0	0	0	0	#DIV/0!		0
30	127.84	0.11	0	255	13.78	255	1		1
31	322.07	0.09	0	255	27.57	510	2		2
32	120.38	0.11	0	255	13.78	255	1		1
33	289.36	0.05	0	255	13.78	255	1		1
34	119.14	0	0	0	0	0	#DIV/0!		0
35	134.11	0.21	0	255	27.57	510	2		2
36	132.71	0.1	0	255	13.78	255	1		1
37	131.3	0.1	0	255	13.78	255	1		1
38	153.41	0.09	0	255	13.78	255	1		1
39	155.9	0.18	0	255	27.57	510	2		2
40	147.41	0.09	0	255	13.78	255	1		1
41	154.71	0.18	0	255	27.57	510	2		2
42	131.57	0.1	0	255	13.78	255	1		1
43	216.06	0.19	0	255	41.35	765	3		3
44	124.44	0.44	0	255	55.14	1020	4		4
45	174.39	0.08	0	255	13.78	255	1		1
46	172.39	0.08	0	255	13.78	255	1		1
47	109.41	0.13	0	255	13.78	255	1		1
48	104.38	0.4	0	255	41.35	765	3		3
49	96.92	0.14	0	255	13.78	255	1		1
50	197.9	0.14	0	255	27.57	510	2		2
51	133.74	0.1	0	255	13.78	255	1		1
52	152.82	0.09	0	255	13.78	255	1		1
53	161.84	0.09	0	255	13.78	255	1		1
54	117.79	0.12	0	255	13.78	255	1		1
55	141.9	0.39	0	255	55.14	1020	4		4

## Sheet: BRCA2 Olaparib exp2
53BP1 BRCA2 Olaparib	Area	Mean	Min	Max	IntDen	RawIntDen	53BP1 Foci number	Nuclei	53BP1/nuclei
HCT116	164.655	0.167	0	255	27.569	510	2
2	738.895	0.466	0	255	344.609	6375	25	4
3	576.888	0.526	0	255	303.256	5610	22
1	134.6	0.102	0	255	13.784	255	1
2	126.329	0.109	0	255	13.784	255	1
3	274.606	0.1	0	255	27.569	510	2
4	149.357	0.092	0	255	13.784	255	1
5	694.136	0.377	0	255	261.903	4845	19
6	840.845	0.525	0	255	441.099	8160	32	8
1	344.5	0.36	0	255	124.059	2295	9
2	266.335	0.414	0	255	110.275	2040	8
3	963.661	0.1	0	255	96.49	1785	7
1	70.435	0.196	0	255	13.784	255	1
2	74.327	0.185	0	255	13.784	255	1
3	151.79	0.091	0	255	13.784	255	1
4	130.059	0.106	0	255	13.784	255	1
5	123.951	0.334	0	255	41.353	765	3
6	315.418	0.044	0	255	13.784	255	1
7	195.467	0.071	0	255	13.784	255	1
8	75.679	0.182	0	255	13.784	255	1
9	156.493	0.44	0	255	68.922	1275	5
10	161.466	0.085	0	255	13.784	255	1
11	160.925	0.257	0	255	41.353	765	3
12	165.574	0	0	0	0	0	#DIV/0!
13	141.195	0.391	0	255	55.137	1020	4
14	170.926	0.161	0	255	27.569	510	2
15	182.71	0.226	0	255	41.353	765	3
16	187.683	0.073	0	255	13.784	255	1
17	197.035	0.21	0	255	41.353	765	3
18	121.735	0.113	0	255	13.784	255	1
19	145.844	0.095	0	255	13.784	255	1
20	158.979	0.173	0	255	27.569	510	2
21	104.761	0.658	0	255	68.922	1275	5
22	173.142	0.478	0	255	82.706	1530	6
23	124.654	0.111	0	255	13.784	255	1
24	208.171	0.728	0	255	151.628	2805	11
25	102.437	0.673	0	255	68.922	1275	5
26	145.141	0.095	0	255	13.784	255	1
27	222.387	0.062	0	255	13.784	255	1
28	146.384	0.377	0	255	55.137	1020	4
29	117.41	0.235	0	255	27.569	510	2
30	191.738	0.575	0	255	110.275	2040	8
31	109.031	0.253	0	255	27.569	510	2
32	75.354	0.183	0	255	13.784	255	1
33	156.006	0.088	0	255	13.784	255	1
34	291.688	0.425	0	255	124.059	2295	9
35	171.683	0.241	0	255	41.353	765	3
36	76.273	0.181	0	255	13.784	255	1
1	176.98	0.078	0	255	13.784	255	1
2	160.223	0.172	0	255	27.569	510	2
3	184.062	0.449	0	255	82.706	1530	6
4	164.169	0.084	0	255	13.784	255	1
5	121.086	0.455	0	255	55.137	1020	4
6	357.474	0.116	0	255	41.353	765	3
7	246.983	0.279	0	255	68.922	1275	5
8	176.386	0.391	0	255	68.922	1275	5
9	104.437	0.132	0	255	13.784	255	1
10	161.574	0.171	0	255	27.569	510	2
11	342.825	0.04	0	255	13.784	255	1
12	98.869	0.139	0	255	13.784	255	1
13	127.248	0.108	0	255	13.784	255	1
14	122.708	0.112	0	255	13.784	255	1
15	116.275	0.474	0	255	55.137	1020	4
16	116.599	0.355	0	255	41.353	765	3
17	136.06	0.304	0	255	41.353	765	3
18	156.331	0.441	0	255	68.922	1275	5
19	131.789	0.418	0	255	55.137	1020	4
20	123.627	0.111	0	255	13.784	255	1
21	306.175	0.09	0	255	27.569	510	2
22	179.251	0.692	0	255	124.059	2295	9
23	130.816	0.211	0	255	27.569	510	2
24	223.414	0.062	0	255	13.784	255	1
25	514.453	0.509	0	255	261.903	4845	19
26	123.356	0.112	0	255	13.784	255	1
27	110.761	0.249	0	255	27.569	510	2
28	123.302	0.112	0	255	13.784	255	1
29	171.304	0.08	0	255	13.784	255	1
30	114.653	0.12	0	255	13.784	255	1
31	124.059	0.222	0	255	27.569	510	2
32	186.981	0.074	0	255	13.784	255	1
33	125.897	0.109	0	255	13.784	255	1
1	117.68	0.351	0	255	41.353	765	3
2	207.144	0.067	0	255	13.784	255	1
3	158.763	0.087	0	255	13.784	255	1
4	99.572	0.138	0	255	13.784	255	1
5	225.469	0	0	0	0	0	#DIV/0!
6	353.041	0.039	0	255	13.784	255	1
7	86.436	0.159	0	255	13.784	255	1
8	278.011	0.05	0	255	13.784	255	1
9	150.601	0.092	0	255	13.784	255	1
10	152.601	0.09	0	255	13.784	255	1
11	107.842	0.128	0	255	13.784	255	1
12	84.922	0.325	0	255	27.569	510	2
13	89.247	0.309	0	255	27.569	510	2
14	127.627	0.108	0	255	13.784	255	1
15	93.355	0.295	0	255	27.569	510	2
16	190.981	0.866	0	255	165.412	3060	12
17	304.715	0.045	0	255	13.784	255	1
18	173.304	0.239	0	255	41.353	765	3
19	139.627	0.395	0	255	55.137	1020	4
20	966.688	0.314	0	255	303.256	5610	22
