# Supplementary material for: Inhibitors of Rho kinases (ROCK) induce multiple mitotic defects and synthetic lethality in BRCA2-deficient cells
Source: eLife journal article supplement (doi:10.7554/elife.80254), 2023-04-19
Supplement: supp [file Figure 3- source data 1.xlsx]

## Sheet: Figure 3 E
Percent of PEO4 and PEO1 cells stained with BrdU at 3 and 6 days after Fasudil treatment
BrdU Experimento 1
		3 days								3 days
		PEO4								PEO1
		NT		Ola		Fasu				NT		Ola		Fasu
	Pic #	DAPI	BrdU	DAPI	BrdU	DAPI	BrdU		Pic #	DAPI	BrdU	DAPI	BrdU	DAPI	BrdU
	1	133	46	126	35				1	391	100	276	82	47	22
	2	185	56	223	55	356	125		2			357	122	70	28
	3	196	63			385	109		3					60	18
	4								4					43	13
	5								5					26	9
	6								6					36	13
	7								7					52	17
	8								8					58	14
	9			152	42				9					40	22
	10								10	254	88			49	27
	11								11					42	26
	12								12
	13								13
	14								14
	15								15
	TOTAL	514	165	501	132	741	234		TOTAL	645	188	633	204	523	209
	%BrdU	32.1012		26.3473		31.5789			%BrdU	29.1473		32.2275		39.9618
		6 days								6 days
		PEO4								PEO1
		NT		Ola		Fasu				NT		Ola		Fasu (restained)		Fasu (old)
	Pic #	DAPI	BrdU	DAPI	BrdU	DAPI	BrdU		Pic #	DAPI	BrdU	DAPI	BrdU	DAPI	BrdU	DAPI	BrdU
	1	62	27	117	53	83	39		1	44	20	102	39	30	11	Bad
	2	71	26	51	24	64	27		2	47	22	51	27	27	7	26	13
	3	48	21	98	32	111	41		3	82	34	55	33	32	18	26	5
	4	38	12	93	47	87	35		4	91	58	73	27	28	11	Bad
	5	44	15	64	18	104	35		5	87	33	70	19	25	7	19	6
	6	84	28	74	31	92	37		6	89	38	48	18	29	8	22	7
	7	55	29	70	37				7	83	40	130	59	34	16	22	10
	8	90	42						8					30	16	32	16
	9	113	33						9					36	9	23	13
	10								10					17	11	33	15
	11								11							19	7
	12								12							32	11
	13								13							31	14
	14								14							29	16
	15								15							30	17
	TOTAL	605	233	567	242	541	214		TOTAL	523	245	529	222	288	114	344	150
	%BrdU	38.5124		42.6808		39.5564			%BrdU	46.8451		41.966		39.5833		43.6047
														Total DAPI Fasudil		632
														Total BrdU Fasudil		264
														% Brdu Fasudil		41.7722
BrdU Experimento 2
		3 days								3 days
		PEO4								PEO1
		NT		Ola		Fasu				NT		Ola		Fasu
	Pic #	DAPI	BrdU	DAPI	BrdU	DAPI	BrdU		Pic #	DAPI	BrdU	DAPI	BrdU	DAPI	BrdU
	1	83	15	121	31	108	35		1
	2	61	29	112	20	63	17		2
	3	110	29	62	19	126	38		3
	4	52	27	51	15	79	25		4
	5	113	19	95	28	79	41		5
	6	71	18	57	15	73	18		6
	7								7
	8								8
	9								9
	10								10
	TOTAL	490	137	498	128	528	174		TOTAL	0	0	0	0	0	0
	%BrdU	27.9592		25.7028		32.9545			%BrdU	#DIV/0!		#DIV/0!		#DIV/0!
		6 days								6 days
		PEO4								PEO1
		NT		Ola		Fasu				NT		Ola		Fasu
	Pic #	DAPI	BrdU	DAPI	BrdU	DAPI	BrdU		Pic #	DAPI	BrdU	DAPI	BrdU	DAPI	BrdU
	1	116	25	91	28	76	23		1	95	37	122	25	47	13
	2	71	23	61	13	102	33		2	46	17	52	18	39	12
	3	62	20	58	18	31	5		3	103	30	74	20	46	11
	4	72	18	30	14	69	20		4	124	29	100	26	39	22
	5	91	26	58	15	81	37		5	111	23	77	27	50	15
	6	58	10	60	16	52	16		6	38	12	59	15	52	22
	7	48	6	59	14	68	25		7			47	13	69	23
	8			61	21	41	9		8					38	20
	9			32	6				9					43	18
	10								10					41	15
	TOTAL	518	128	510	145	520	168		TOTAL	517	148	531	144	464	171
	%BrdU	24.7104		28.4314		32.3077			%BrdU	28.6267		27.1186		36.8534

## Sheet: Figure 3 F. I
Labelling scheme and IdU track lengths of shScramble and shBRCA2 HCT116p21-/- cells, treated with Fasudil for 48 h
-
SCR - NT	SCR - FASU	B2 - NT	B2 - FASU
14.155	6.655	5.518	8.962
8.834	8.69	4.233	9.47
10.578	11.691	12.028	12.955
5.792	11.457	6.834	8.745
10.948	6.111	9.878	8.872
11.212	12.474	11.32	8.962
10.287	7.045	9.337	9.167
9.004	9.778	7.632	9.37
16.366	10.215	7.039	9.603
11.472	6.485	10.151	7.518
11.376	7.781	7.313	9.363
10.611	7.187	6.386	8.309
17.514	6.157	6.88	11.471
10.009	10.253	8.855	6.564
12.205	11.956	9.156	7.742
6.644	10.286	6.029	9.092
10.137	12.526	5.37	6.435
13.837	6.545	6.276	9.823
11.925	10.222	8.388	10.535
14.373	8.882	5.875	7.594
15.886	6.998	10.367	7.735
9.817	9.522	7.212	9.8
6.687	8.596	9.411	6.392
5.94	9.363	7.199	8.931
12.485	7.722	3.504	5.731
13.089	6.809	6.682	7.048
14.175	5.606	5.897	7.472
13.924	6.261	11.649	8.862
14.424	6.115	3.64	9.203
12.735	3.786	6.569	12.592
7.121	6.044	10.369	8.859
3.586	9.369	6.463	10.248
3.007	4.162	4.064	7.743
1.782	6.438	10.574	6.36
2.303	6.321	10.433	6.832
4.67	12.436	4.485	9.014
9.262	2.356	7.4	8.172
6.415	5.741	8.501	10.39
6.24	5.22	3.39	6.137
9.824	8.673	10.718	8.322
9.161	9.735	12.942	6.028
10.451	9.403	4.512	9.051
11.279	7.129	10.433	8.534
13.785	8.124	10.278	8.679
9.395	8.346	5.408	8.54
8.843	6.071	7.517	7.431
13.797	7.505	8.547	2.447
8.649	5.729	10.934	6.402
8.328	11.493	7.431	9.795
7.499	4.958	10.367	9.726
5.568	8.478	7.037	6.426
8.49	3.984	7.861	8.841
5.66	5.527	5.221	7.549
4.32	14.562	3.222	7.149
5.829	12.469	12.997	10.324
5.598	11.106	10.098	9.742
11.81	11.279	5.806	6.263
9.019	10.917	11.127	7.641
9.564	7.245	9.942	8.052
16.487	8.233	16.757	7.175
11.822	8.055	2.714	8.304
9.594	10.192	7.914	6.135
7.315	8.608	4.748	5.666
6.523	9.382	11.082	5.697
6.67	9.866	5.731	8.065
8.058	10.848	7.851	5.865
10.385	12.444	8.351	6.866
14.504	6.975	5.592	7.427
7.317	11.272	8.451	9.033
6.486	8.587	7.665	4.92
6.484	7.756	12.437	5.775
4.633	4.102	12.54	4.881
8.057	9.41	8.201	7.122
11.215	10.755	7.829	7.168
7.864	11.792	9.358	6.247
10.377	10.541	12.103	5.386
3.153	6.831	3.521	8.512
8.578	5.869	6.083	8.255
3.731	10.536	4.499	8.633
5.613	8.595	4.798	12.853
6.645	8.908	7.94	4.128
3.618	12.791	7.272	8.199
6.499	12.95	5.506	16.423
5.773	9.311	7.212	9.655
3.07	9.781	8.618	15.371
10.725	10.443	6.835	8.257
10.917	9.334	4.666	6.546
9.5	8.946	4.996	6.927
5.6	20.358	13.311	9.589
14.073	13.334	4.885	4.735
8.06	10.975	2.93	8.706
9.299	8.335	9.593	6.905
5.859	10.483	9.843	5.618
3.901	8.852	10.927	9.419
8.993	10.617	7.748	5.977
6.812	6.787	9.956	8.601
4.447	6.828	8.315	8.785
7.899	5.138	3.243	8.756
8.047	7.811	9.858	8.456
5.979	14.349	10.492	10.513
7.176	6.76	11.534	11.505
8.124	12.056	5.807	6.112
4.492	4.823	12.173	7.641
9.254	5.905	3.193	8.409
4.965	7.349		6.661
12.958	9.188		6.09
16.458	7.861		10.262
6.988	4.396		7.9
9.395	9.456		10.353
2.623	7.28		8.27
8.136	5.958		7.037
5.332	6.463		6.57
7.112	9.184		8.743
5.778	7.144		6.276
7.578	4.999		6.629
11.721	12.55		10.26
9.681	7.774		7.168
9.174	9.786		6.667
7.689	8.787		8.776
4.239	8.82		6.45
3.693	6.303		6.867
6.287	8.033		7.995
9.675	7.652		5.945
6.971	7.038		10.943
10.607	8.5		7.129
4.13	5.414		6.125
9.611	5.96		6.88
3.344	11.679		9.24
4.01	10.19		4.494
4.682	5.376		4.92
3.951	10.174		7.73
4.959	10.49		7.513
3.329	6.53		6.825
8.613	5.424		9.586
11.851	7.06		6.379
7.479	7.228		5.156
10.104	8.086		5.216
7.129	4.261		8.271
12.773	2.894		7.049
8.262	7.525		7.206
12.768	11.212		5.96
7.941	7.696		8.293
4.593	10.473		8.054
7.457	13.564		5.08
18.143	6.511		8.416
4.985	6.941		7.461
10.681			8.765
6.3			5.098
10.353			5.852
7.701			8.2
8.546			7.445
10.657			8.189
8.133			7.534
10.282			5.298
8.735			8.141
15.75			4.595
4.439			6.762
6.012			9.796
8.462			6.365
6.653			9.927
8.33			11.63
14.526			9.968
8.468			11.604
7.583			7.284
6.759			11.164
15.609			9.12
7.512			10.725
12.218			11.78
8.943			5.967
10.307			4.986
			6.23
			5.389
8.6321	8.49128	7.88253	7.57
			7.817
			9.4
			7.961
			6.515
			8.566
			7.87187

## Sheet: Figure 3 F. II
Labelling scheme and IdU track lengths of shScramble and shBRCA2 HCT116p21-/- cells, treated with Fasudil for 48 h
-
SCR - NT	SCR - Fasu	B2 - NT	B2 - fasu
3.463	5.541	2.482	7.374
3.451	8.466	4.69	2.65
7.839	12.902	5.121	8.678
8.227	4.065	6.106	8.382
4.276	6.218	3.316	8.699
3.607	10.624	5.569	3.366
5.558	3.562	4.051	7.772
6.025	8.026	12.141	9.573
13.996	5.697	7.637	3.866
9.33	9.474	7.899	7.897
12.079	5.309	9.656	8.029
8.922	6.236	4.835	5.495
5.621	5.564	7.793	6.119
8.216	7.976	7.078	9.263
9.896	8.422	7.414	8.065
11.487	3.807	3.902	9.597
13.142	5.408	8.439	4.562
11.57	9.117	7.048	6.093
4.244	8.391	8.958	3.43
7.802	6.635	3.316	8.185
7.741	10.039	7.171	6.476
9.374	6.584	2.638	3.324
12.047	6.618	2.82	2.516
9.758	6.489	5.634	3.117
4.685	8.359	4.723	6.03
7.463	8.693	7.863	7.468
9.175	7.623	3.155	8.226
7.822	6.426	4.398	4.34
5.408	5.178	5.426	5.05
9.854	5.02	4.139	6.802
9.344	4.14	4.644	3.311
8.27	3.923	2.094	10.067
7.278	8.615	8.106	2.938
7.404	5.957	5.25	5.691
4.144	6.07	5.005	4.286
13.197	6.811	4.796	3.781
6.688	8.043	8.083	11.165
8.85	4.957	5.198	5.95
2.894	6.7	8.946	9.092
10.444	5.712	2.583	7.976
6.46	8.517	6.479	3.785
7.857	5.373	8.082	9.782
6.388	12.801	6.684	5.213
5.491	3.856	14.661	7.361
9.266	6.588	5.931	4.938
6.699	6.1	5.741	1.509
6.699	6.167	6.819	8.333
5.874	7.412	7.69	5.373
6.152	5.854	3.937	2.823
3.178	5.174	5.832	2.306
5.041	7.673	6.615	3.582
7.087	10.676	8.089	10.747
9.653	6.038	5.889	3.216
10.644	6.919	9.521	7.71
7.939	5.765	6.509	4.031
4.306	6.358	7.6	8.536
8.36	6.843	11.89	10.917
6.484	8.316	7.765	9.714
7.053	7.495	8.844	3.999
8.539	6.505	7.856	3.354
5.361	9.814	8.023	6.783
5.938	10.772	9.903	7.494
7.632	5.461	6.383	7.356
7.025	8.877	6.239	5.801
6.183	9.047	4.209	8.094
8.751	6.236	6.852	5.969
8.97	6.302	8.659	6.706
6.346	10.986	3.841	3.814
6.395	8.16	3.771	6.698
6.935	10.969	5.953	4.889
5.845	4.935	2.452	7.855
4.377	5.983	7.349	4.462
5.259	6.816	4.386	3.072
6.104	6.808	8.755	3.174
5.869	6.685	3.057	10.216
7.374	6.151	14.51	4.239
2.991	9.378	4.57	6.212
6.788	5.413	2.845	11.319
7.252	5.638	7.577	7.746
6.057	6.704	5.952	2.617
5.63	5.752	3.565	8.875
9.997	5.187	3.459	9.481
8.573	9.571	9.923	5.134
6.484	6.294	4.553	6.607
5.037	7.104	6.3	6.378
8.325	6.499	7.041	6.37
9.023	5.117	4.317	4.638
6.448	4.33	10.418	6.833
9.071	3.734	9.332	7.024
7.648	9.225	13.778	7.509
6.286	3.344	9.938	5.927
3.746	9.213	4.767	7.546
5.395	3.109	9.332	5.797
7.611	6.293	7.253	9.222
5.041	7.089	6.152	8.781
6.571	8.476	6.757	5.21
7.522	3.652	6.931	8.492
4.507	13.948	7.117	5.524
6.134	10.472	6.94	4.961
6.523	8.052	9.134	8.25
6.75	5.876	8.535	7.27
5.928	8.698	6.336	3.622
3.477	13.966	7.226	3.722
7.121	8.891	5.089	8.15
7.318	5.589	8.732	11.151
7.146	4.898	9.015	9.666
3.86	5.856	7.631	7.638
4.445	7.245	5.266	13.26
7.26	4.485	3.842	4.255
5.599	7.391	6.94	6.993
6.546	6.438	5.469	2.967
6.368	5.942	5.874	6.193
5.887	9.43	7.949	5.486
8.079	7.553	6.099	4.793
6.745	6.639	13.088	3.654
4.584	6.994	8.607	4.586
2.676	4.324	10.834	5.919
5.267	4.558	9.919	3.249
6.115	3.405	9.019	9.281
3.265	4.737	5.795	3.588
6.1	9.16	7.194	6.675
9.923	4.929	13.022	8.312
5.895	8.73	6.593	3.571
5.862	5.408	5.703	5.03
5.47	6.525	8.266	3.985
7.469	10.089	7.669	6.789
5.051	4.097	7.592	5.896
7.196	2.799	3.417	8.327
8.534	4.144	12.738	8.563
3.174	7.607	4.612	4.858
6.229	6.302	9.377	4.637
7.612	4.538	5.73	5.713
5.346	6.479	4.619	6.379
7.107	4.992	3.261	6.465
6.717	6.328	5.39	8.666
3.454	7.966	9.808	10.242
5.387	5.787	8.96	7.307
7.148	8.479	7.723	7.904
8.61	5.327	9.555	8.154
7.83	4.554		6.301
7.816	8.443		5.387
6.336	7.997		7.748
6.817	7.557		9.574
10.286	5.417		9.32
5.328	6.509
3.411	6.128
6.69	9.138
7.044	5.88
5.629	9.206
3.155
3.298
6.84202

## Sheet: Figure 3 G I
Origin firing frequency (percentage) of shScramble or shBRCA2 HCT116p21-/- cells
n	origenes		terminaciones		bicolor	multi
	rojas	roja-verde-roja	verdes	verde-roja-verde			Total
scr-dmso	7	16	45	47	229	156	500
scr-fasu	14	10	45	62	209	136	476
b2-dmso	17	6	63	59	216	135	496
b2-fasu	10	13	39	53	266	99	480
%	origenes		terminaciones		bicolor	multi
scr-dmso	4.6		18.4		45.8	31.2
scr-fasu	5.04202		22.479		43.9076	28.5714
b2-dmso	4.6371		24.5968		43.5484	27.2177
b2-fasu	4.79167		19.1667		55.4167	20.625

## Sheet: Figure 3 G II
	Origin firing frequency (percentage) of shScramble or shBRCA2 HCT116p21-/- cells
n	origenes		terminaciones		bicolor	multi
	rojas	roja-verde-roja	verdes	verde-roja-verde			Total
scr-dmso	12	17	55	80	255	155	574
scr-fasu	15	11	63	71	224	146	530
b2-dmso	22	9	49	49	236	159	524
b2-fasu	13	13	47	51	219	124	467
%	origenes		terminaciones		bicolor	multi
scr-dmso	5.05226		23.5192		44.4251	27.0035
scr-fasu	4.90566		25.283		42.2642	27.5472
b2-dmso	5.91603		18.7023		45.0382	30.3435
b2-fasu	5.56745		20.985		46.8951	26.5525
