# Supplementary material for: Inhibitors of Rho kinases (ROCK) induce multiple mitotic defects and synthetic lethality in BRCA2-deficient cells
Source: eLife journal article supplement (doi:10.7554/elife.80254), 2023-04-19
Supplement: supp [file Figure 3- source data 2.xlsx]

## Sheet: SCR Olaparib 
yH2AX intensity/cell of shScramble or shBRCA2 HCT116p21-/- cells
	Area	Mean		Min	Max	IntDen	RawintDean
1	98328	647686	647.686	364	1206	63685830	1178140	647.686
2	60056	535323	535.323	410	1186	32149630	594744	535.323
3	168115	574616	574.616	381	1474	96601546	1787056000	574.616
4	68543	487853	487.853	374	643	33439034	618597000	487.853
5	92166	503557	503.557	389	785	46410804	858565000	503.557
6	89247	465913	465.913	382	822	41581311	769223000	465.913
7	73949	554701	554.701	386	1402	41019558	758831000	554.701
8	66435	541993	541.993	375	1302	36007409	666110000	541.993
9	71138	562236	562.236	370	985	39996382	739903000	562.236
10	163412	555196	555.196	394	1320	90725632	1678356000	555.196
11	469316	495154	495.154	380	1057	232384089	4298931000	495.154
12	98004	607938	607.938	367	1202	59580366	1102192000	607.938
13	102707	580323	580.323	377	1010	59603124	1102613000	580.323
14	724083	557231	557.231	377	1239	403481958	7464113000	557.231
15	69949	617455	617.455	365	1252	43190241	798987000	617.455
16	245037	675777	675.777	387	1997	165590457	3063299000	675.777
17	171520	443608	443.608	379	746	76087902	1407569000	443.608
18	92328	527616	527.616	379	1150	48713763	901168000	527.616
19	109842	508559	508.559	384	696	55861242	1033391000	508.559
20	87409	492165	492.165	374	852	43019639	795831000	492.165
21	64976	582073	582.073	390	1350	37820563	699652000	582.073
1	58435	484460	484.46	364	628	28309312	523701	484.46
2	111950	498671	498.671	381	1028	55826430	1032747	498.671
3	105788	582463	582.463	372	1592	61617638	1139880	582.463
4	106815	449030	449.03	367	798	47963246	887284	449.03
5	70543	630011	630.011	401	1141	44443157	822165	630.011
6	19028	488457	488.457	376	725	9294269	171937	488.457
7	124437	661342	661.342	406	1747	82295776	1522410	661.342
8	109950	490682	490.682	373	854	53950732	998048	490.682
9	62435	467350	467.35	369	804	29178969	539789	467.35
10	99247	690383	690.383	369	1718	68518621	1267543	690.383
11	55029	438451	438.451	372	576	24127629	446343	438.451
12	104923	512623	512.623	375	962	53786077	995002000	512.623
13	106869	588222	588.222	364	1260	62862824	1162915000	588.222
14	143087	548695	548.695	408	851	78511027	1452395000	548.695
15	154060	687596	687.596	393	1429	105931276	1959649000	687.596
16	87085	521428	521.428	379	963	45408331	840020000	521.428
1	10703	518758	518.758	380	1044	5552334	102714	518.758
2	6541	431355	431.355	381	528	2821412	52194	431.355
3	72706	406726	406.726	313	737	29571255	547046	406.726
4	78003	432703	432.703	349	792	33752236	624391	432.703
5	87787	438579	438.579	368	679	38501726	712253	438.579
6	120599	529255	529.255	364	1018	63827836	1180767	529.255
7	80598	665924	665.924	394	1244	53672072	992893	665.924
8	65084	515012	515.012	339	896	33518929	620075000	515.012
9	146979	539060	539.06	387	1260	79230408	1465703000	539.06
10	72489	446922	446.922	353	601	32397100	599322000	446.922
11	172548	583361	583.361	338	1078	100657494	1862088000	583.361
12	79030	408353	408.353	353	475	32272230	597012000	408.353
13	128384	598238	598.238	386	1106	76803985	1420816000	598.238
14	115410	471738	471.738	364	815	54443293	1007160000	471.738
15	131951	510409	510.409	361	796	67349168	1245909000	510.409
16	140600	507974	507.974	388	778	71421280	1321240000	507.974
17	75571	473038	473.038	363	1120	35747777	661307000	473.038
18	135357	568865	568.865	388	1337	76999831	1424439000	568.865
19	259254	682528	682.528	378	2038	176947891	3273403000	682.528
20	393043	530298	530.298	382	1057	208429818	3855795000	530.298
21	69192	427810	427.81	361	510	29601040	547597000	427.81
22	107788	661564	661.564	418	1220	71308789	1319159000	661.564
23	98707	572264	572.264	353	2515	56486295	1044954000	572.264
24	142114	529859	529.859	378	991	75300302	1392999000	529.859
25	161196	514249	514.249	366	1360	82894827	1533492000	514.249
26	153466	671853	671.853	387	1497	103106405	1907391000	671.853
27	125302	546027	546.027	368	1030	68418455	1265690000	546.027
28	73733	457648	457.648	364	989	33743641	624232000	457.648
29	33461	481688	481.688	375	684	16117682	298165000	481.688
30	83139	465020	465.02	383	954	38661030	715200000	465.02
31	132978	733228	733.228	380	2003	97503528	1803742000	733.228
32	84868	429850	429.85	374	712	36480671	674865000	429.85
33	95517	429301	429.301	376	630	41005666	758574000	429.301
34	235415	500270	500.27	349	1316	117771055	2178676000	500.27
35	64867	446912	446.912	348	598	28990043	536294000	446.912
1	40272	398988	398.988	328	855	16068004	297246	398.988
2	73516	575348	575.348	363	1152	42297556	782473	575.348
3	74598	463667	463.667	363	720	34588432	639860	463.667
4	73679	418474	418.474	343	829	30832604	570380	418.474
5	101680	520449	520.449	343	900	52919177	978965	520.449
6	75679	442268	442.268	346	830	33470279	619175	442.268
7	90598	491590	491.59	377	899	44537215	823905	491.59
8	72435	467900	467.9	345	788	33892512	626986	467.9
9	153358	489977	489.977	354	1116	75141701	1390065	489.977
10	104815	589209	589.209	373	1149	61758022	1142477	589.209
11	107302	484100	484.1	362	1001	51944705	960938	484.1
12	86003	514464	514.464	369	1114	44245743	818513000	514.464
13	176872	487744	487.744	365	1148	86268369	1595900000	487.744
14	271957	554989	554.989	386	1194	150933104	2792149000	554.989
15	119843	658641	658.641	376	1444	78933261	1460206000	658.641
16	145628	457043	457.043	347	905	66558001	1231273000	457.043
17	91517	465020	465.02	371	956	42557350	787279000	465.02
18	137249	538581	538.581	339	1327	73919543	1367456000	538.581
19	74490	509843	509.843	368	1373	37977975	702564000	509.843
20	178169	450108	450.108	350	845	80195528	1483557000	450.108
21	206819	417349	417.349	339	1007	86315723	1596776000	417.349
22	276119	447805	447.805	343	1000	123647509	2287386000	447.805
23	467046	486774	486.774	346	1144	227345776	4205726000	486.774
24	133951	443290	443.29	352	791	59379277	1098472000	443.29
25	162763	608414	608.414	362	1283	99027590	1831936000	608.414
26	182116	437914	437.914	363	712	79750861	1475331000	437.914
27	227955	447329	447.329	347	815	101970899	1886385000	447.329
28	81192	477029	477.029	355	1232	38731141	716497000	477.029
29	86166	441527	441.527	343	897	38044464	703794000	441.527
1	71084	513440	513.44	376	1128	36497320	675173000	513.44
2	34866	506555	506.555	330	890	17661690	326728000	506.555
3	169629	468792	468.792	351	1821	79520420	1471068000	468.792
4	147033	514661	514.661	338	1010	75672209	1399879000	514.661
5	143465	530852	530.852	323	1340	76158769	1408880000	530.852
6	120167	453512	453.512	341	752	54497241	1008158000	453.512
7	56489	747121	747.121	378	1630	42203931	780741000	747.121
8	108869	477606	477.606	329	817	51996653	961899000	477.606
9	98869	451142	451.142	331	930	44603866	825138000	451.142
10	83517	537932	537.932	367	1121	44926420	831105000	537.932
11	171412	446609	446.609	349	1284	76554353	1416198000	446.609
12	120545	485585	485.585	341	814	58535081	1082855000	485.585
13	65354	459200	459.2	366	878	30010570	555173000	459.2
14	189251	472103	472.103	333	1631	89346008	1652834000	472.103
15	194008	482594	482.594	348	1537	93627047	1732030000	482.594
16	106923	415997	415.997	357	550	44479753	822842000	415.997
17	100382	514033	514.033	343	1039	51599880	954559000	514.033
18	86328	478292	478.292	358	1305	41289894	763832000	478.292
19	65895	482466	482.466	348	784	31791886	588126000	482.466
20	144925	535931	535.931	338	1258	77669750	1436832000	535.931
21	129627	449152	449.152	342	600	58222149	1077066000	449.152
22	221036	527742	527.742	339	1166	116649928	2157936000	527.742
23	120924	426710	426.71	340	672	51599393	954550000	426.71
24	87139	461934	461.934	340	859	40252338	744638000	461.934
25	147628	430932	430.932	347	656	63617449	1176875000	430.932
26	66759	510107	510.107	331	834	34054464	629982000	510.107
27	121573	472295	472.295	354	883	57418116	1062192000	472.295
28	124383	451806	451.806	379	759	56197202	1039606000	451.806
29	116275	428927	428.927	371	542	49873431	922621000	428.927
30	100274	492116	492.116	360	1072	49346599	912875000	492.116
31	137519	451247	451.247	368	682	62055115	1147973000	451.247
32	84057	439997	439.997	348	823	36985016	684195000	439.997
33	117356	506634	506.634	369	706	59456632	1099903000	506.634
34	79841	435632	435.632	350	738	34781359	643429000	435.632
35	98869	438767	438.767	359	803	43380357	802504000	438.767
36	164818	471133	471.133	369	669	77650938	1436484000	471.133
37	159844	507529	507.529	333	1353	81125674	1500764000	507.529
38	98112	422470	422.47	352	494	41449414	766783000	422.47
39	98058	470917	470.917	350	670	46177173	854243000	470.917
40	75733	450547	450.547	358	1035	34121170	631216000	450.547
41	86436	496709	496.709	367	1304	42933474	794237000	496.709
42	81355	438678	438.678	334	937	35688477	660210000	438.678
43	78922	477327	477.327	356	801	37671638	696897000	477.327
1	74922	414490	414.49	343	591	31054397	574483	414.49
2	92328	487297	487.297	333	1186	44991233	832304	487.297
3	40434	531624	531.624	382	910	21495738	397655	531.624
4	80003	438151	438.151	350	743	35053532	648464	438.151
5	29839	696292	696.292	449	1126	20776682	384353	696.292
6	70652	401325	401.325	345	490	28354233	524532	401.325
7	112761	489465	489.465	344	891	55192675	1021023	489.465
8	69462	467447	467.447	354	1088	32469914	600669	467.447
9	142438	550124	550.124	344	1110	78358751	1449578	550.124
10	105248	424612	424.612	376	580	44689329	826719	424.612
11	86977	438044	438.044	366	561	38099548	704813	438.044
12	61138	842311	842.311	378	2461	51496903	952654	842.311
13	75300	507328	507.328	350	793	38201984	706708	507.328
14	84868	521415	521.415	376	1054	44251581	818621	521.415
15	69300	415350	415.35	348	622	28783818	532479	415.35
16	84544	468513	468.513	354	785	39609987	732755	468.513
17	59300	520360	520.36	343	865	30857199	570835	520.36
18	65841	443706	443.706	347	565	29213835	540434	443.706
19	89950	446906	446.906	361	638	40199038	743652	446.906
20	64867	504534	504.534	382	611	32727870	605441	504.534
21	57462	582380	582.38	383	1765	33464603	619070	582.38
22	59948	495405	495.405	373	626	29698720	549404	495.405
23	57948	556398	556.398	385	1020	32242337	596459	556.398
24	120005	418741	418.741	347	488	50250960	929605	418.741
25	25893	483710	483.71	381	558	12524671	231697	483.71
26	72760	713360	713.36	433	1445	51903892	960183	713.36
27	118491	733795	733.795	419	1542	86948343	1608479	733.795
28	96112	517989	517.989	366	1280	49784995	920985	517.989
29	495047	530266	530.266	348	2272	262506664	4856176	530.266
30	64813	468066	468.066	357	631	30336962	561211	468.066
31	89409	495011	495.011	354	793	44258501	818749	495.011
32	56273	489726	489.726	359	784	27558147	509805	489.726
33	66057	501290	501.29	386	834	33113561	612576	501.29
34	102058	435092	435.092	377	642	44404723	821454	435.092
35	169358	454739	454.739	369	901	77013777	1424697	454.739
36	111896	445138	445.138	385	596	49809375	921436	445.138
37	72219	414325	414.325	339	657	29922189	553538	414.325
38	239848	528219	528.219	381	993	126692066	2343708	528.219
39	108221	517651	517.651	378	841	56020546	1036338000	517.651
40	148330	517422	517.422	387	1050	76749388	1419806	517.422
41	221306	517451	517.451	339	1243	114515084	2118443	517.451
42	146763	490811	490.811	372	977	72032764	1332552	490.811
43	49732	455190	455.19	375	672	22637406	418775	455.19
44	42813	487740	487.74	352	733	20881389	386290	487.74
45	34920	533186	533.186	376	1021	18619027	344438	533.186
1	114599	442416	442.416	324	967	50700546	937922	442.416
2	140762	422226	422.226	345	661	59433604	1099477	422.226
3	118978	412153	412.153	323	586	49037073	907149	412.153
4	109572	421753	421.753	352	706	46212310	854893	421.753
5	141465	421354	421.354	337	645	59606908	1102683	421.354
6	138654	487319	487.319	309	1253	67568799	1249972	487.319
7	149682	402437	402.437	348	546	60237528	1114349	402.437
8	277903	464150	464.15	336	1014	128988862	2386197	464.15
9	104545	427207	427.207	341	510	44662247	826218	427.207
10	94166	467987	467.987	348	897	44068493	815234	467.987
11	124492	525574	525.574	381	1055	65429577	1210398000	525.574
12	159628	480724	480.724	336	979	76737117	1419579000	480.724
13	92544	481581	481.581	356	1368	44567594	824467000	481.581
14	87950	451305	451.305	353	614	39692045	734273000	451.305
15	87787	532770	532.77	377	1905	46770495	865219000	532.77
16	102653	421298	421.298	349	984	43247378	800044000	421.298
17	144222	475225	475.225	317	844	68537973	1267901000	475.225
18	157304	479622	479.622	339	1030	75446254	1395699000	479.622
19	93517	455266	455.266	344	809	42575243	787610000	455.266
20	80328	436980	436.98	335	1062	35101534	649352000	436.98
21	75787	421991	421.991	345	747	31981353	591631000	421.991
22	176115	463052	463.052	353	1109	81550448	1508622000	463.052
23	152060	458730	458.73	373	927	69754617	1290408000	458.73
24	133519	418098	418.098	351	671	55824052	1032703000	418.098
25	100653	460176	460.176	357	712	46317936	856847000	460.176
26	131735	424877	424.877	353	518	55971193	1035425000	424.877
27	116816	444348	444.348	352	891	51906757	960236000	444.348
28	137681	572101	572.101	348	1543	78767578	1457141000	572.101
29	101247	454396	454.396	366	1249	46006409	851084000	454.396
30	179196	527896	527.896	348	1261	94597086	1749975000	527.896
31	140492	445476	445.476	356	735	62585894	1157792000	445.476
32	65949	487957	487.957	346	709	32180064	595307000	487.957
33	127411	776798	776.798	333	2577	98972345	1830914000	776.798
34	76760	537391	537.391	351	1435	41250054	763095000	537.391
35	76976	464570	464.57	348	1165	35760804	661548000	464.57
36	74976	458522	458.522	342	947	34378153	635970000	458.522
37	68543	421005	421.005	337	621	28857064	533834000	421.005
38	83679	476849	476.849	346	931	39902324	738163000	476.849
39	22163	470400	470.4	352	689	10425505	192864000	470.4
1	113086	366039	366.039	314	607	41393790	765754	366.039
3	241091	438597	438.597	321	944	105741647	1956141	438.597
4	171358	451750	451.75	322	938	77411145	1432048	451.75
5	71895	492177	492.177	322	955	35384951	654595	492.177
6	117356	446684	446.684	339	761	52421048	969750	446.684
7	99355	403770	403.77	311	494	40116711	742129	403.77
8	84814	437294	437.294	348	612	37088750	686114	437.294
9	92328	465557	465.557	325	629	42983962	795171	465.557
10	162061	626688	626.688	344	1032	101561531	1878812000	626.688
11	110491	445040	445.04	364	1041	49172862	909661000	445.04
12	121789	416545	416.545	336	500	50730439	938475000	416.545
13	93625	418905	418.905	346	539	39220134	725543000	418.905
14	76165	444602	444.602	352	734	33863213	626444000	444.602
15	161142	519500	519.5	334	968	83713076	1548629000	519.5
16	110977	423931	423.931	342	622	47046830	870331000	423.931
17	139789	490840	490.84	336	898	68614193	1269311000	490.84
18	109950	432947	432.947	336	833	47602691	880614000	432.947
19	91247	470072	470.072	331	1086	42892661	793482000	470.072
20	98274	468810	468.81	342	1142	46071926	852296000	468.81
21	83463	418016	418.016	330	494	34888823	645417000	418.016
22	86003	453659	453.659	362	823	39016234	721771000	453.659
23	98869	436261	436.261	360	656	43132671	797922000	436.261
24	93896	467459	467.459	342	850	43892378	811976000	467.459
25	125032	503859	503.859	339	802	62998559	1165426000	503.859
26	105031	435599	435.599	355	630	45751480	846368000	435.599
27	230874	501111	501.111	347	1015	115693619	2140245000	501.111
28	191413	488673	488.673	364	1024	93538448	1730391000	488.673
29	101518	446954	446.954	352	1110	45373681	839379000	446.954
30	79246	476214	476.214	352	1850	37738236	698129000	476.214
31	89355	429576	429.576	328	671	38384749	710089000	429.576
32	87625	488836	488.836	365	776	42834335	792403000	488.836
33	102545	434517	434.517	362	777	44557378	824278000	434.517
34	264281	483581	483.581	322	1252	127801354	2364229000	483.581
35	211090	435265	435.265	341	778	91880003	1699711000	435.265
36	170385	477469	477.469	339	858	81353629	1504981000	477.469
37	122329	440766	440.766	353	530	53918623	997454000	440.766
38	97517	444149	444.149	339	1113	43312246	801244000	444.149
39	57246	439575	439.575	335	719	25163725	465510000	439.575
40	90869	442271	442.271	342	971	40188552	743458000	442.271
41	100923	486474	486.474	386	998	49096427	908247000	486.474
42	318986	479737	479.737	341	1390	153029460	2830930000	479.737
43	56921	450575	450.575	314	719	25647312	474456000	450.575
44	131789	462431	462.431	335	737	60943341	1127406000	462.431
45	146492	492135	492.135	336	1074	72094010	1333685000	492.135
46	163034	569212	569.212	340	1366	92800743	1716744000	569.212
47	70219	488089	488.089	355	787	34273176	634028000	488.089
48	177575	442690	442.69	337	808	78610545	1454236000	442.69
49	99788	411574	411.574	326	665	41070101	759766000	411.574
50	150763	413227	413.227	344	696	62299288	1152490000	413.227
51	145249	439480	439.48	329	788	63834161	1180884000	439.48
1	43029	389448	389.448	331	444	16757492	310001	389.448
2	36056	432147	432.147	354	503	15581282	288242	432.147
3	201143	430544	430.544	338	878	86601140	1602056	430.544
4	45407	399510	399.51	347	460	18140629	335588	399.51
5	126275	496147	496.147	364	728	62651194	1159000	496.147
6	92652	392064	392.064	326	451	36325692	671998	392.064
7	60327	460824	460.824	384	864	27800048	514280000	460.824
8	145033	394742	394.742	341	452	57250650	1059094000	394.742
9	103247	425827	425.827	367	491	43965570	813330000	425.827
10	74435	409380	409.38	346	499	30472373	563716000	409.38
11	21677	467219	467.219	367	550	10127709	187355000	467.219
12	69895	539456	539.456	363	855	37705099	697516000	539.456
13	108707	495317	495.317	389	791	53844512	996083000	495.317
14	103464	509079	509.079	385	940	52671167	974377000	509.079
15	142546	612558	612.558	393	1204	87317926	1615316000	612.558
16	60759	518387	518.387	375	757	31496793	582667000	518.387
17	151574	478918	478.918	368	774	72591435	1342887000	478.918
18	104545	482493	482.493	387	839	50442103	933141000	482.493
19	167358	483965	483.965	379	880	80995507	1498356000	483.965
20	250767	495069	495.069	336	1267	124146827	2296623000	495.069
21	54164	488867	488.867	387	769	26479184	489845000	488.867
22	201197	613740	613.74	381	2649	123482962	2284342000	613.74
23	94382	484044	484.044	380	944	45685099	845140000	484.044
24	69787	529024	529.024	357	1144	36918797	682970000	529.024
25	70111	476507	476.507	357	912	33408330	618029000	476.507
26	155412	523296	523.296	379	1001	81326277	1504475000	523.296
27	145736	566964	566.964	390	1270	82626870	1528535000	566.964
28	75517	428758	428.758	369	495	32378342	598975000	428.758
29	74652	431568	431.568	378	517	32217255	595995000	431.568
30	98869	624462	624.462	387	1156	61739859	1142141000	624.462
31	109788	526791	526.791	402	1046	57835431	1069912000	526.791
32	63030	442277	442.277	364	551	27876538	515695000	442.277
33	242929	533655	533.655	376	1076	129640239	2398247000	533.655
34	265362	538075	538.075	379	1317	142784827	2641412000	538.075
35	98761	479402	479.402	363	1086	47346086	875867000	479.402
36	228388	533308	533.308	371	919	121801056	2253228000	533.308
37	35407	443208	443.208	361	547	15692583	290301000	443.208
38	88328	465794	465.794	381	778	41142644	761108000	465.794
39	75895	429608	429.608	362	543	32605108	603170000	429.608
40	127843	518677	518.677	372	1070	66309234	1226671000	518.677
41	220766	531429	531.429	364	1131	117321415	2170358000	531.429
42	68057	453787	453.787	371	783	30883309	571318000	453.787
43	78057	490118	490.118	368	748	38257230	707730000	490.118
44	60651	551668	551.668	367	1153	33459251	618971000	551.668
45	116924	546836	546.836	402	962	63938057	1182806000	546.836
46	59246	439970	439.97	371	513	26066302	482207000	439.97
47	101085	678357	678.357	368	1132	68571813	1268527000	678.357
48	114761	544068	544.068	338	1151	62438050	1155057000	544.068
49	137952	550418	550.418	357	1372	75931031	1404667000	550.418
50	194873	461127	461.127	353	760	89861164	1662364000	461.127
51	232550	434725	434.725	349	819	101095296	1870187000	434.725
52	72652	621237	621.237	433	1585	45133888	834943000	621.237
53	58597	789848	789.848	458	2300	46282691	856195000	789.848
1	63894	402766	402.766	321	555	25734559	476070000	402.766
2	46759	427191	427.191	320	1557	19974865	369520000	427.191
3	51732	405918	405.918	340	526	20998907	388464000	405.918
4	73895	412563	412.563	338	832	30486265	563973000	412.563
5	89139	516946	516.946	349	795	46079926	852444000	516.946
6	54597	500493	500.493	358	828	27325326	505498000	500.493
7	60327	518396	518.396	377	813	31273162	578530000	518.396
8	63949	483077	483.077	359	836	30892066	571480000	483.077
9	84868	459069	459.069	377	832	38960394	720738000	459.069
10	126059	450951	450.951	366	733	56846471	1051617000	450.951
11	13838	439312	439.312	361	856	6079382	112464000	439.312
12	164601	455842	455.842	371	605	75032129	1388038000	455.842
13	86760	525125	525.125	387	1334	45560013	842826000	525.125
14	71516	540932	540.932	348	1119	38685517	715653000	540.932
15	60219	481684	481.684	377	677	29006368	536596000	481.684
16	75733	512595	512.595	360	893	38820226	718145000	512.595
17	109140	420338	420.338	356	488	45875485	848662000	420.338
18	92274	422788	422.788	360	914	39012342	721699000	422.788
19	81301	492359	492.359	380	758	40029086	740508000	492.359
20	71787	510667	510.667	364	1558	36659111	678166000	510.667
21	94328	718429	718.429	383	1481	67768104	1253659000	718.429
22	102545	583944	583.944	364	1416	59880378	1107742000	583.944
23	98382	437099	437.099	368	782	43002828	795520000	437.099
24	84868	482778	482.778	373	974	40972529	757961000	482.778
25	94977	436798	436.798	350	793	41485685	767454000	436.798
26	56164	583057	583.057	382	1781	32747060	605796000	583.057
27	78976	464714	464.714	367	1039	36701329	678947000	464.714
28	113248	434968	434.968	367	608	49259136	911257000	434.968
29	70219	526791	526.791	395	786	36990746	684301000	526.791
30	111950	418629	418.629	365	546	46865688	866980000	418.629
31	66814	434535	434.535	361	1223	29032801	537085000	434.535
32	39731	408298	408.298	346	676	16222227	300099000	408.298
33	78706	450394	450.394	370	730	35448629	655773000	450.394
34	73841	452062	452.062	376	1018	33380653	617517000	452.062
35	81841	436911	436.911	365	599	35757290	661483000	436.911
36	57137	491913	491.913	362	835	28106655	519952000	491.913
37	85030	459860	459.86	368	860	39102129	723360000	459.86
38	89733	448544	448.544	363	703	40249365	744583000	448.544
39	75895	466358	466.358	360	600	35394195	654766000	466.358
40	82544	454284	454.284	376	811	37498334	693691000	454.284
41	52272	457738	457.738	346	804	23927080	442633000	457.738
42	82598	423968	423.968	344	872	35018882	647823000	423.968
43	68273	394857	394.857	324	649	26958068	498704000	394.857
44	77300	474257	474.257	367	642	36660300	678188000	474.257
45	79571	424889	424.889	360	590	33808725	625436000	424.889
46	83409	442911	442.911	331	666	36942636	683411000	442.911
47	7892	476041	476.041	366	701	3757017	69502000	476.041
48	11946	456394	456.394	402	518	5452276	100863000	456.394
1	104329	609807	609.807	351	1166	63620260	1176927	609.807
2	140600	542847	542.847	393	783	76324506	1411946	542.847
3	50164	489625	489.625	343	1312	24561646	454372	489.625
4	110275	504826	504.826	333	639	55669559	1029845	504.826
5	112545	564757	564.757	367	780	63560690	1175825	564.757
6	158331	536046	536.046	364	968	84872583	1570079	536.046
7	107085	502836	502.836	364	717	53846404	996118	502.836
8	70597	603505	603.505	375	839	42605893	788177	603.505
9	136114	584409	584.409	389	1000	79545988	1471541000	584.409
10	89841	467394	467.394	373	1065	41991327	776808000	467.394
11	62651	472052	472.052	377	1074	29574607	547108000	472.052
12	88868	440088	440.088	374	764	39109967	723505000	440.088
13	133249	514682	514.682	375	872	68580624	1268690000	514.682
14	91788	445513	445.513	363	782	40892526	756481000	445.513
15	72868	484745	484.745	385	1398	35322300	653436000	484.745
16	111734	537899	537.899	358	999	60101793	1111838000	537.899
17	26920	518958	518.958	396	761	13970351	258441000	518.958
18	95626	486839	486.839	381	632	46554270	861219000	486.839
19	85085	532454	532.454	393	991	45303570	838082000	532.454
20	119140	526348	526.348	389	1445	62709142	1160072000	526.348
21	101031	443346	443.346	384	565	44791711	828613000	443.346
22	82274	546763	546.763	384	922	44984152	832173000	546.763
23	557320	664330	664.33	410	1259	370244446	6849244000	664.33
24	81949	493891	493.891	393	815	40474023	748739000	493.891
25	92544	445650	445.65	368	585	41242324	762952000	445.65
26	50813	469500	469.5	384	811	23856645	441330000	469.5
27	218279	626041	626.041	404	1901	136651767	2527955000	626.041
28	164061	566081	566.081	414	959	92871719	1718057000	566.081
29	162061	443119	443.119	366	585	71812215	1328472000	443.119
30	92977	491106	491.106	386	776	45661477	844703000	491.106
31	68057	510600	510.6	387	1777	34749790	642845000	510.6
32	174980	535418	535.418	414	647	93687536	1733149000	535.418
33	79625	560331	560.331	395	990	44616299	825368000	560.331
34	178980	446453	446.453	380	574	79906219	1478205000	446.453
35	131519	639460	639.46	388	1574	84101092	1555807000	639.46
36	94490	450311	450.311	377	636	42550053	787144000	450.311
37	44650	543769	543.769	392	780	24279527	449153000	543.769
38	80868	440775	440.775	365	645	35644637	659399000	440.775
39	91679	564142	564.142	398	1927	51720209	956785000	564.142
40	71787	456238	456.238	363	691	32751817	605884000	456.238
41	65624	534648	534.648	397	841	35085912	649063000	534.648

## Sheet: SCR Fasudil 
	Area	Mean		Min	Max	IntDen	RawintDean
1	185.09	393.92		337	465	72909.8	1348777
2	64.33	456.31		375	545	29352.9	543007
3	120.06	500.36		407	607	60073	1111305
4	99.3	402.27		348	468	39946.3	738976
5	113.46	408.4		349	458	46339	857236
6	145.68	432.38		350	552	62989.9	1165265
7	166.6	404.28		348	472	67354.4	1246005
8	48.22	470.94		347	622	22707.9	420079
9	73.79	473.49		404	545	34937.1	646310
10	129.19	473.17		396	550	61130.3	1130865
11	77.62	464.72		391	552	36074.2	667345
12	113.63	509.31		403	639	57871.2	1070574
13	90.76	461.6		368	556	41894.9	775024
14	95.84	538.21		373	715	51582.7	954242
15	91.25	503.26		395	643	45920.9	849502
16	61.35	485.17		396	585	29767.1	550669
17	110.11	571.16		401	745	62891.8	1163451
18	75.03	437.76		335	672	32845	607607
19	103.57	510.21		375	643	52843.8	977570
20	117.25	544.25		396	677	63812.7	1180486
21	64.54	395.45		339	488	25523.5	472165
22	63.19	445.49		320	713	28151.6	520783
23	79.62	423.52		359	510	33722.6	623842
24	90.92	431.84		365	522	39264.1	726357
25	96.71	480.54		367	576	46471.5	859688
26	89.41	513.72		389	644	45931.3	849695
27	84.92	511.16		410	613	43409	803034
28	133.57	559.77		389	720	74770.3	1383194
29	104.44	730.45		439	955	76286	1411234
30	129.79	484.76		381	608	62916.2	1163902
31	119.9	516.68		406	636	61948.1	1145993
32	121.14	490.89		373	657	59466.5	1100085
33	116.27	464.7		380	641	54032.4	999559
34	110.33	483.28		370	624	53319.4	986368
35	108	499.38		392	618	53934.9	997755
36	115.84	471.48		377	578	54617	1010374
37	199.25	440.48		336	536	87767	1623624
38	35.73	460.87		392	535	16467.3	304633
1	110.71	420.17		331	533	46515.8	860507
2	77.08	436.3		376	516	33632.1	622168
3	98.76	443.04		366	771	43755.4	809442
4	108.92	464.91		369	886	50640	936802
5	26.92	421.37		350	683	11343.2	209840
6	95.73	475.92		367	785	45561.4	842852
7	95.25	713.3		390	1183	67939.5	1256830
8	73.89	735.07		400	1298	54318.2	1004846
9	313.47	409.01		351	488	128214	2371869
10	9.62	396.51		353	437	3815.18	70578
11	154.17	433.04		352	1321	66760.7	1235022
12	198.55	397.86		338	1059	78994.4	1461337
13	122.11	455.34		374	585	55603.5	1028623
14	146.28	464.19		334	829	67899.7	1256093
15	81.73	487.41		370	837	39837.1	736957
16	107.25	467.15		371	631	50100.2	926816
17	125.36	501.16		366	1068	62824.2	1162201
18	109.09	436.17		327	849	47580.2	880198
19	65.19	442.97		366	699	28877.7	534216
20	51.19	420.67		337	573	21534.9	398379
21	29.95	506.76		334	758	15175.9	280743
1	224.6	409.4		312	831	91953.6	1701072
2	183.58	434.48		337	818	79759.7	1475495
3	109.46	502.95		327	894	55054.8	1018472
4	71.25	389.71		338	648	27765.1	513634
5	99.41	384.16		337	501	38189	706467
6	91.19	396.53		329	599	36160.6	668943
7	110.11	1151.04		558	2747	126744	2344662
8	52.16	975.08		545	1658	50864.3	940952
9	35.84	973.32		492	2189	34883.1	645311
10	29.14	910.15		496	1610	26518.5	490573
11	39.08	911.98		456	1689	35642.6	659361
12	102.11	517.95		369	919	52889.1	978409
13	77.52	442.68		373	627	34315.2	634805
14	121.79	407.03		348	473	49572	917044
15	84	575.12		366	1455	48311.6	893729
16	115.52	384.82		342	440	44454	822365
17	65.52	504.8		356	1615	33072.5	611816
18	82.44	505.53		359	2045	41674.1	770940
19	121.84	436.7		364	786	53208.7	984320
20	94.71	437.13		360	578	41398.9	765849
21	63.46	874.62		609	1448	55505	1026801
22	81.79	453.71		350	752	37107.8	686466
23	122.44	464.56		370	793	56879.6	1052230
24	67.52	568.08		424	1154	38355	709538
25	82.54	454.42		349	628	37509.7	693902
26	65.14	543.7		397	1057	35415.7	655164
27	98.81	783.39		371	1913	77410.5	1432036
28	114.87	435.62		344	790	50040	925702
29	89.95	599.36		357	1115	53912.6	997342
30	74.6	455.39		350	594	33971.4	628445
31	122.06	524.53		398	1453	64023	1184378
32	144.49	457.25		331	845	66068.7	1222221
33	113.57	423.75		359	959	48126.1	890297
34	77.03	453.87		359	717	34961.6	646763
35	74.92	524.95		373	884	39330.5	727584
36	132.65	419.23		335	561	55611.9	1028779
37	89.03	441.55		348	647	39311.2	727228
38	143.95	477.51		349	825	68738.5	1271611
39	138.44	416.2		344	688	57617.9	1065888
40	89.14	449.57		358	594	40074.6	741349
41	116.38	544.38		351	1407	63356.9	1172056
1	119.46	373.73		320	436	44647.7	825948
2	91.63	432.52		367	561	39630.2	733129
3	60.38	479.27		359	595	28939	535349
4	80.87	405.66		337	476	32804.8	606864
5	60.71	465.54		368	935	28260.7	522801
6	62.71	440.3		355	537	27609	510746
7	98.87	422.55		365	494	41777.3	772848
8	76.76	411.98		347	549	31623.2	585005
9	79.3	442.98		365	777	35128.4	649850
10	198.22	409.73		350	605	81218.1	1502474
11	139.14	436.26		375	633	60701.4	1122930
12	88.76	398.92		337	466	35408.2	655025
13	219.36	415.26		358	598	91091.8	1685130
14	121.09	424.92		372	688	51451.7	951817
15	88	421.81		355	505	37120.5	686701
16	166.28	438.11		369	686	72846.9	1347613
17	169.84	462.65		368	650	78578.4	1453641
18	149.36	543.71		370	934	81206.9	1502267
19	145.14	449.61		362	747	65256.7	1207199
20	123.46	408.5		347	578	50435.2	933013
21	95.95	467.13		365	781	44821.1	829157
22	155.63	467.92		357	833	72821.5	1347143
23	142.92	424.83		341	546	60718.9	1123255
24	118.28	415.65		352	1241	49160.9	909440
25	169.03	464.61		350	706	78534.4	1452828
26	150.71	447.96		360	607	67511.9	1248919
27	164.98	417.5		353	536	68879.8	1274224
28	93.3	489.09		362	686	45632.8	844173
29	120.44	465.19		359	795	56026.3	1036445
30	158.38	435.17		346	699	68923.9	1275040
31	364.88	525.78		366	3712	191848	3549035
32	235.31	439.05		356	988	103311	1911172
33	133.52	451.19		369	615	60243	1114450
34	93.08	427.15		362	692	39761.3	735554
35	294.77	522.84		350	1227	154116	2851025
36	133.03	422.69		332	589	56231.8	1040246
37	82.22	382.76		303	531	31470.1	582173
1	73.95	387.84		333	447	28680.2	530563
2	28.11	526.02		385	995	14785.9	273528
3	61.19	420.15		357	590	25709.5	475606
4	85.95	416.92		356	505	35834	662902
5	55.03	439.28		376	530	24173	447183
6	53.03	490.78		391	602	26025.4	481451
7	91.63	417.31		363	567	38236	707337
8	46.22	430.75		361	676	19908.4	368291
9	42	394.28		348	463	16560.2	306352
10	65.52	418.4		363	476	27411.9	507099
11	144.06	529.7		366	850	76308.7	1411653
12	67.68	430.99		348	880	29168.6	539597
13	56.49	444.02		366	571	25081.9	463997
14	137.68	482.51		387	921	66432.4	1228950
15	215.74	615.14		355	1036	132709	2455024
16	125.46	498.61		370	862	62558.3	1157282
17	203.14	435.25		351	877	88417.4	1635655
18	65.08	540.38		401	926	35170.2	650623
19	104.92	462.79		363	766	48557.7	898280
20	84.06	535.21		393	765	44988.6	832255
21	56	465.67		378	910	26078.3	482429
22	82.98	553.58		382	829	45934.4	849752
23	67.89	423.9		373	497	28780.7	532421
24	61.68	478.89		400	964	29537	546413
25	112.44	443.24		357	887	49836.8	921944
26	102.06	452.88		374	626	46220.4	855043
27	66.71	438.19		379	526	29229.5	540724
28	179.47	531.1		368	1093	95314.1	1763239
29	63.52	432.81		383	491	27490.5	508553
30	61.14	451.21		362	641	27585.7	510315
31	50.22	468.85		368	777	23544.8	435561
32	52.65	479.72		393	632	25257.6	467246
33	151.41	486.12		372	1163	73604.1	1361620
34	94.81	377.85		315	444	35826.1	662755
35	114.98	466.07		365	691	53587.9	991336
1	72.38	383.75		346	435	27776.5	513844
2	57.46	435.52		368	521	25025.8	462959
3	66	456.71		382	516	30143.9	557639
4	60.49	392.5		346	442	23741.8	439206
5	61.73	443.67		376	599	27388.8	506673
6	59.84	454.56		382	548	27200.7	503193
7	66.06	454.57		391	552	30027.7	555490
8	68.65	428.37		366	538	29408.3	544031
9	62.6	437.17		368	592	27365.5	506242
10	107.79	487.42		359	629	52537.8	971909
11	74.22	409.52		354	465	30394.2	562270
12	136.55	481.93		373	592	65806	1217362
13	61.68	514.55		373	831	31736.4	587100
14	66.16	442.81		371	722	29298.5	542000
15	74.54	456.78		377	537	34050	629899
16	69.08	439.17		369	500	30339.5	561258
17	59.84	616.33		389	1292	36881.2	682274
18	66	399.37		337	464	26359.2	487626
19	75.08	445.87		379	594	33478	619318
20	66.22	449.5		372	517	29765.6	550641
21	72.6	416.04		357	500	30203.3	558738
22	69.41	439.45		366	538	30501.4	564253
23	100.76	523		361	739	52697.4	974863
24	80.33	460.63		389	691	37000.9	684489
25	75.89	449.33		376	716	34101.9	630860
26	113.25	495.25		354	741	56085.8	1037546
27	83.46	422.61		358	478	35272.1	652508
28	62.6	433.66		366	583	27146.1	502183
29	72.76	425.81		359	485	30981.6	573136
30	149.03	526.4		414	700	78451.2	1451289
31	72.92	441.9		373	612	32224	596119
32	75.79	482.34		406	547	36554.7	676234
33	122.6	459.86		338	578	56378.8	1042965
34	102.06	483.97		404	665	49393.4	913741
35	61.35	412.71		350	481	25321.5	468428
36	77.62	444.39		351	578	34495.8	638146
37	135.36	650.59		407	925	88062.2	1629085
38	86.87	461.52		391	532	40091.4	741661
39	69.46	399.62		349	448	27758.6	513514
40	99.68	386.41		327	487	38517.5	712545
41	55.73	419.18		361	474	23361.5	432170
1	71.62	485.61		331	717	34781.8	643437
2	141.74	438.19		363	530	62107	1148932
3	103.63	419.16		326	620	43435.5	803524
4	180.71	479.36		331	674	86624.3	1602484
5	47.57	471.7		366	562	22438.6	415098
6	123.36	557.19		385	2208	68733.4	1271517
7	183.09	433.26		350	515	79325.4	1467460
8	34.43	446.9		391	511	15388.6	284677
9	106.44	414.81		345	485	44151.1	816763
10	97.57	661.98		361	1523	64590.3	1194872
11	107.09	388.32		315	446	41583	769254
12	74.6	438.18		350	634	32687.2	604688
13	231.58	526.19		361	1159	121853	2254184
14	67.46	434.75		367	650	29329.3	542571
15	64.92	460.27		383	677	29881.2	552780
16	70.76	421.72		366	474	29840.7	552030
17	76.6	426.31		361	591	32654.7	604087
18	105.19	555.92		362	767	58479.5	1081827
19	119.68	470.43		364	895	56301	1041527
20	112.98	501.28		384	882	56633.2	1047671
21	69.3	434.11		372	490	30083.7	556525
22	34.11	476.44		383	799	16251.2	300636
23	75.3	418.05		365	468	31479.3	582344
24	75.89	435.14		378	560	33024.9	610936
25	62.38	450.16		379	673	28081.6	519489
26	63.79	444.79		373	584	28371.6	524853
27	74.38	409.7		360	463	30473.9	563745
28	70.71	435.18		373	598	30769.7	569216
29	151.52	475.56		378	994	72056.5	1332991
30	144.33	448.54		360	748	64737.2	1197590
31	151.03	503.44		381	989	76036.8	1406624
32	67.57	466.78		388	682	31540.5	583475
33	118.28	604.69		367	864	71519.3	1323054
34	70.71	457.4		369	821	32340.7	598279
35	6.05	401.96		362	444	2433.56	45019
36	150.38	553.91		370	1669	83300	1540988
37	85.73	477.93		365	1071	40974.5	757997
38	71.35	458.4		376	743	32708.9	605090
39	126.82	453.46		362	1186	57506.1	1063819
40	99.46	475.75		381	827	47320	875385
41	70.81	486.43		409	1018	34445.7	637219
42	75.08	461.93		373	921	34683.9	641627
43	123.3	443.59		341	707	54695.3	1011822
44	65.19	425.16		366	500	27716.8	512739
45	71.35	453.77		372	1300	32378.4	598976
46	61.14	451.34		379	516	27593.6	510461
47	66.81	436.54		368	603	29166.8	539564
48	109.68	513.62		371	847	56333.4	1042126
49	77.14	413.34		344	560	31884.5	589840
50	59.19	445.43		361	569	26365.8	487748
51	63.08	442.9		372	893	27939.7	516864
52	56.54	409.23		355	455	23138.9	428052
53	46.65	393.93		347	496	18377.2	339965
54	11.84	497.63		379	631	5891.05	108980
1	133.3	434.24		318	753	57885.3	1070834
2	119.95	487.62		343	874	58490.3	1082027
3	111.95	531.6		356	853	59513.1	1100948
4	48.6	390.96		342	483	18999.5	351477
5	70.17	426.68		359	833	29937.9	553828
6	77.79	411.53		354	531	32011.6	592191
7	22.38	356.9		316	414	7987.08	147755
8	115.73	528.8		376	742	61200.5	1132164
9	65.95	424.85		345	718	28018	518312
10	88.27	476.67		393	662	42077.9	778410
11	112	563.41		374	1132	63104.7	1167389
12	113.03	464.21		360	799	52470.5	970664
13	21.57	382.28		330	434	8245.09	152528
14	69.3	481.4		399	897	33361.3	617159
15	56.76	418.39		354	545	23747.2	439306
16	146.98	452.5		353	698	66507.3	1230335
17	51.84	427.47		372	506	22159.9	409941
18	80.6	433.89		367	725	34970.7	646932
19	128.33	404.28		335	566	51881.3	959766
20	75.62	427.1		378	479	32299.6	597518
21	67.89	416.17		361	517	28256	522714
22	117.3	681.85		397	1247	79982	1479607
23	103.41	451.81		367	602	46721.8	864318
24	552.78	468.55		345	634	259004	4791371
25	145.36	502.22		372	990	73001.9	1350481
26	74.44	421.64		368	479	31384.8	580596
27	48.16	409.62		353	555	19728.8	364967
28	111.9	541.94		404	923	60641.4	1121821
29	46.92	392.83		357	434	18431.8	340975
30	71.62	454.14		373	563	32527.5	601734
31	144.6	510.01		376	849	73747.6	1364276
32	165.63	501.58		360	713	83075.2	1536828
33	107.41	427.66		355	597	45934.9	849762
34	6.22	407.26		372	447	2531.72	46835
35	75.84	432.71		368	529	32816.8	607087
36	62.92	457.29		368	614	28773.5	532289
37	55.08	422.1		369	479	23250.5	430116
38	41.24	467.46		375	642	19280.3	356671
39	97.95	415.49		364	482	40696.9	752862
40	63.79	448.84		399	535	28629.8	529629
41	44.76	428.3		381	505	19169.9	354629
42	115.57	443.16		349	556	51217.1	947477
43	117.3	476.46		381	709	55889.5	1033914
44	106	476.5		370	1192	50511.4	934423
45	76.33	452.37		386	536	34528.4	638750
46	102.27	437.36		366	512	44730.9	827488
47	106.44	491.27		389	653	52289.5	967316
48	80.65	432.63		346	540	34892.1	645478
49	66.92	456.64		359	585	30559	565319
50	57.73	409.24		352	466	23626.4	437070
51	37.57	560.16		422	928	21044.8	389313
1	77679	533278	533.278	404	874	41424440	766321	533.278
2	70922	591002	591.002	432	853	41914892	775394000	591.002
3	118437	436277	436.277	330	753	51671396	955882000	436.277
4	96599	381419	381.419	319	483	36844470	681595000	381.419
5	136114	425809	425.809	341	833	57958354	1072186000	425.809
6	92328	407245	407.245	339	531	37600122	695574000	407.245
7	66651	349882	349.882	306	428	23320082	431404000	349.882
8	101193	469964	469.964	372	662	47557229	879773000	469.964
9	110761	530947	530.947	374	742	58808389	1087911000	530.947
10	119356	460181	460.181	347	799	54925420	1016079000	460.181
11	81517	607179	607.179	436	1132	49495308	915626000	607.179
12	29461	379459	379.459	324	434	11179103	206805000	379.459
13	89409	466393	466.393	357	897	41699748	771414000	466.393
14	89841	406282	406.282	334	545	36500942	675240000	406.282
15	95301	411948	411.948	338	506	39259108	726264000	411.948
16	130438	399623	399.623	317	566	52125901	964290000	399.623
17	93517	472142	472.142	391	698	44153469	816806000	472.142
18	67841	434480	434.48	368	725	29475414	545273000	434.48
19	94923	422497	422.497	362	479	40104548	741904000	422.497
20	127897	397293	397.293	321	517	50812659	939996000	397.293
21	81409	759401	759.401	522	1247	61821863	1143658000	759.401
22	102274	452388	452.388	377	602	46267717	855918000	452.388
23	164709	491774	491.774	387	628	80999831	1498436000	491.774
24	99463	538238	538.238	385	990	53535040	990358000	538.238
25	117680	488571	488.571	381	606	57495201	1063618000	488.571
26	154277	410764	410.764	352	479	63371223	1172320000	410.764
27	96382	397593	397.593	340	555	38320908	708908000	397.593
28	109086	469335	469.335	389	566	51197647	947118000	469.335
29	118221	533938	533.938	376	923	63122726	1167723000	533.938
30	86652	386372	386.372	339	434	33480009	619355000	386.372
31	41623	466391	466.391	376	563	19412735	359121000	466.391
32	92869	549527	549.527	421	849	51033857	944088000	549.527
33	106166	527698	527.698	420	713	56023789	1036398000	527.698
34	106004	428059	428.059	355	597	45376060	839423000	428.059
35	90977	429440	429.44	366	529	39068993	722747000	429.44
36	70922	450749	450.749	339	614	31967947	591383000	450.749
37	98545	413166	413.166	362	479	40715222	753201000	413.166
38	29839	485141	485.141	399	642	14476156	267798000	485.141
39	84814	418623	418.623	364	482	35505226	656820000	418.623
40	132708	437504	437.504	374	535	58060359	1074073000	437.504
41	100599	412914	412.914	348	505	41538606	768433000	412.914
42	55732	457657	457.657	401	556	25506117	471844000	457.657
43	76868	491907	491.907	415	709	37811914	699492000	491.907
44	76544	494653	494.653	402	1192	37862511	700428000	494.653
45	109464	437140	437.14	355	536	47851079	885209000	437.14
46	55245	451931	451.931	392	512	24967122	461873000	451.931
47	66651	517029	517.029	430	653	34460697	637497000	517.029
48	50489	453491	453.491	372	540	22896119	423561000	453.491
49	40704	484741	484.741	391	585	19731072	365010000	484.741
50	72489	401377	401.377	312	466	29095560	538246000	401.377
51	26542	586536	586.536	476	928	15567605	287989000	586.536
1	53894	402279	402.279	353	450	21680448	401072	402.279
2	54543	450311	450.311	348	540	24561214	454364	450.311
3	81030	420945	420.945	348	491	34109278	630996	420.945
4	58651	468197	468.197	379	872	27460251	507994	468.197
5	56543	469293	469.293	376	814	26535186	490881	469.293
6	72489	442819	442.819	363	512	32099682	593820	442.819
7	55624	468070	468.07	379	548	26035868	481644	468.07
8	50056	419206	419.206	342	567	20983825	388185	419.206
9	102977	468737	468.737	371	614	48269204	892944	468.737
10	64057	408788	408.788	365	458	26185604	484414	408.788
11	66327	439616	439.616	382	504	29158428	539409	439.616
12	57516	412459	412.459	364	464	23722910	438856	412.459
13	57354	441558	441.558	368	495	25324975	468493	441.558
14	88166	460651	460.651	382	614	40613650	751322	460.651
15	100058	474540	474.54	366	596	47481605	878374	474.54
16	56543	443080	443.08	380	548	25053018	463462	443.08
17	71625	435171	435.171	378	532	31168942	576602	435.171
18	50705	398455	398.455	345	446	20203577	373751	398.455
19	233631	437483	437.483	363	576	102209557	1890800	437.483
20	79679	425320	425.32	369	544	33888998	626921	425.32
21	109302	446591	446.591	385	611	48813172	903007	446.591
22	30217	415617	415.617	375	468	12558889	232330	415.617
23	53948	425962	425.962	371	711	22979852	425110	425.962
24	202819	442247	442.247	372	620	89696076	1659310	442.247
25	98004	474116	474.116	366	760	46465239	859572	474.116
26	56381	515215	515.215	359	711	29048153	537369	515.215
27	63246	453723	453.723	370	556	28696085	530856	453.723
28	58759	440477	440.477	372	510	25882078	478799	440.477
29	52435	393562	393.562	346	446	20636244	381755	393.562
30	65624	406997	406.997	356	486	26708869	494094	406.997
31	86490	454319	454.319	383	586	39294083	726911	454.319
32	112275	451409	451.409	357	568	50681843	937576	451.409
33	80544	456387	456.387	381	690	36759169	680017	456.387
34	110599	466479	466.479	344	597	51592150	954416	466.479
35	79301	431711	431.711	372	549	34234904	633320	431.711
36	104545	409770	409.77	328	647	42839362	792496	409.77

## Sheet: SCR NT  
	Area	Mean	Min	Max	IntDen	RawintDean
1	109.57	424.1	353	504	46470	859660
2	58.16	425.27	343	522	24735.8	457593
3	197.36	443.24	352	552	87477.4	1618267
4	52.6	454.17	368	622	23887.9	441908
5	61.14	484.1	392	719	29596.6	547515
6	117.09	548.48	359	688	64218.8	1188000
7	98.76	581.59	351	862	57438.8	1062574
8	106.17	452.19	346	544	48007.9	888110
9	72.33	402.35	355	463	29100.6	538339
10	93.25	428.49	350	506	39955.6	739149
11	59.62	510.94	383	738	30464.5	563571
12	98.33	463.11	361	597	45537	842401
13	69.35	418.74	360	470	29041.7	537249
14	73.35	426.46	371	642	31282.8	578708
15	67.35	489.97	388	739	33001.5	610503
16	72.17	425.76	362	479	30724.9	568388
17	65.68	454.87	378	530	29875.3	552670
18	99.36	462.53	388	554	45955.3	850139
19	128.76	544.69	394	785	70135.4	1297452
20	105.57	498.34	365	693	52610.3	973251
21	53.84	515.05	393	671	27730.4	512992
22	115.79	482.74	377	644	55895.7	1034028
23	64.54	449.59	378	592	29018.1	536813
24	61.41	454.21	373	535	27891.8	515978
25	99.57	460.56	372	645	45858.2	848343
26	68.71	408.4	358	482	28059	519071
27	103.9	492.06	379	672	51123.2	945740
28	83.52	458.19	375	657	38266.8	707908
29	101.95	620.19	432	823	63228.2	1169674
30	66.81	417.38	359	466	27886.7	515882
31	61.57	456.05	378	524	28079.1	519442
32	59.95	473.87	383	612	28407.9	525524
33	153.9	457.57	375	1369	70419.5	1302707
34	82.06	454.66	379	616	37308.5	690180
35	61.89	443.91	353	550	27475.6	508278
36	67.62	519.57	403	801	35135.5	649980
37	82.38	577.22	396	758	47552.6	879687
38	143.25	526.77	386	947	75459.1	1395937
39	66.71	463.01	366	579	30885.2	571354
40	112.38	447.67	366	603	50310.7	930710
41	84.44	498.3	403	650	42074.7	778351
42	66.98	479.99	383	636	32147.5	594704
43	95.08	427.42	349	535	40641.1	751829
44	110.17	509.63	424	600	56143.8	1038618
45	71.62	426.85	367	494	30573	565578
46	70.81	459.52	387	533	32540	601966
47	121.68	689.08	435	1182	83848.1	1551126
48	13.3	456.82	398	517	6074.73	112378
49	132.65	574.89	416	1067	76260.8	1410768
50	119.19	747.83	382	1558	89136.4	1648957
51	81.14	448.28	364	643	36372.3	672861
52	63.68	482.83	373	760	30745.7	568772
53	65.89	405.33	343	472	26709.1	494099
54	71.3	445.31	377	516	31751	587369
55	72.87	442.09	379	519	32214	595935
56	92.87	420.21	366	563	39024.7	721928
57	75.79	405.96	353	462	30766.8	569162
58	68.54	492.8	380	777	33778	624868
59	200.28	522.95	368	891	104736	1937545
60	66.33	457.95	375	549	30374.3	561901
61	51.08	498.04	402	666	25441.5	470648
62	181.57	572.07	352	893	103873	1921569
63	140.11	548.59	385	944	76865.2	1421949
64	277.47	450.54	339	1023	125011	2312604
65	79.41	442.37	369	508	35128.2	649845
66	63.68	477.54	374	634	30408.9	562541
67	58.98	467.65	365	769	27579.9	510207
68	76.76	466.89	376	579	35838.7	662989
69	156.82	614.47	351	952	96359.5	1782578
70	65.57	454.65	370	589	29811.6	551493
71	64.06	498.12	370	586	31908	590274
72	22.38	429.86	370	485	9619.9	177961
73	17.3	421.65	363	538	7293.76	134929
1	49.95	443.86	342	1248	22170	410129
2	54.98	479.74	403	580	26373.6	487891
3	64.06	516.42	372	999	33080.3	611960
4	104.76	459.28	365	728	48114.3	890078
5	112.11	451.57	364	681	50627.1	936563
6	108.54	440.89	344	1032	47856.9	885317
7	78.44	488.67	381	650	38328.8	709055
8	84.11	434.32	363	800	36531.1	675797
9	123.36	472.26	369	756	58256.7	1077705
10	84.38	417.2	359	494	35204	651248
11	111.84	563.78	406	931	63055	1166470
12	116.55	555.98	353	933	64796.5	1198687
13	70.71	462.46	381	1101	32698.7	604902
14	88.22	491.21	403	1005	43334.1	801648
15	69.68	505.71	384	756	35236.8	651854
16	62.98	447.16	383	536	28160.1	520941
17	132.6	437.48	353	781	58010	1073141
18	290.34	762.4	344	2207	221353	4094856
19	301.74	446.99	352	668	134876	2495103
20	49.25	470.54	363	703	23171.8	428661
21	319.63	483.82	346	1204	154646	2860836
22	138.33	487.83	337	1061	67482	1248366
23	62.06	533.99	364	994	33137.4	613017
24	88.81	488.58	382	647	43392.8	802735
25	100.33	446.77	367	709	44823.5	829201
26	159.41	468.52	383	1151	74687.6	1381665
27	92.6	462	373	1048	42780.7	791410
28	152.44	505.13	373	1048	77001.3	1424466
29	112.55	432.34	357	971	48657.8	900133
30	152.6	417.66	356	487	63735.6	1179061
31	156.17	459.35	386	787	71736.7	1327075
32	156.71	576.44	381	1372	90333.5	1671102
33	62.06	453.42	362	615	28137.5	520522
34	76.33	459.09	365	899	35041.2	648236
35	94	466.19	367	964	43823.3	810698
36	112.82	411.7	361	495	46446.3	859222
37	132.6	525.81	343	821	69721.8	1289801
38	101.79	490.73	348	918	49950.8	924052
39	35.51	446.74	379	500	15866.1	293511
40	25.73	474.66	382	619	12213.3	225937
41	18.87	435.44	365	566	8214.82	151968
1	23.08	432.71	367	508	9987.92	184769
2	14.81	578.01	382	809	8561.21	158376
3	48	408.37	347	487	19602.6	362634
4	38.54	411.61	343	575	15864.3	293478
5	55.68	463.23	372	586	25791.5	477123
6	68.65	431.84	364	581	29646.7	548442
7	68.49	426.74	343	607	29227	540678
8	85.19	405.11	335	467	34512.1	638447
9	132.82	476.63	366	652	63304.8	1171091
10	84.98	393.6	333	499	33446.9	618742
11	71.41	430.83	353	540	30765	569130
12	127.73	476.91	353	712	60918.2	1126940
13	66.16	438.24	360	530	28995.8	536401
14	115.63	470.58	354	652	54410.9	1006561
15	108.82	558.34	374	997	60756	1123941
16	80.76	466.83	360	608	37701.5	697449
17	71.14	446.18	355	696	31740.3	587172
18	112.6	435.27	344	595	49011	906667
19	76.11	507.8	378	779	38649.6	714988
20	87.14	497.74	343	676	43372	802349
21	70.44	512.79	375	854	36118.3	668161
22	94.98	450.97	374	720	42832.1	792361
23	80.17	431.8	365	639	34615.4	640359
24	84.38	484.87	354	824	40914.3	756883
25	63.35	435.18	330	750	27570.4	510031
26	83.79	480.04	386	819	40221.4	744066
27	185.25	517.68	371	952	95899.9	1774076
28	73.14	443.23	367	549	32417	599691
29	83.19	447.14	371	553	37199	688154
30	75.95	464.48	360	893	35277	652598
31	81.46	465.03	384	918	37882.5	700798
32	64.76	474.82	361	583	30749.2	568838
33	102.98	435.58	369	622	44854.4	829772
34	60.65	480.45	371	604	29140	539069
35	160.11	609.17	387	1037	97537.1	1804363
36	72.6	451.56	384	548	32782.4	606449
37	71.41	454.51	377	601	32455.6	600405
38	172.44	501.35	372	1276	86453	1599315
39	110.55	501.77	358	1109	55467.7	1026110
40	127.79	515.54	360	874	65880.9	1218748
41	119.52	430.3	364	646	51429.1	951399
42	123.68	456.11	374	674	56411.9	1043578
43	134.92	559.97	370	1891	75553.2	1397677
44	121.09	489.29	352	640	59246	1096007
45	120.06	458.33	372	576	55026.4	1017947
46	114.44	494.89	392	834	56633.9	1047685
47	111.03	542.17	370	906	60198.4	1113626
48	98.6	473.63	368	819	46699.6	863907
49	128.98	453.54	372	781	58496.9	1082148
50	80.87	505.89	393	882	40910.4	756812
51	68.81	503.29	379	862	34633.4	640692
52	93.3	482.51	370	754	45018.4	832806
53	111.03	440.43	374	661	48901.1	904633
54	108.44	488.8	386	781	53003.6	980526
55	105.19	503.03	359	1043	52915.1	978890
56	18.6	515.83	382	699	9592.07	177446
57	101.9	488.13	396	858	49739	920134
58	100.49	528.36	359	814	53095.1	982220
59	90	455.94	376	969	41036.2	759138
60	146.71	507.62	360	937	74472.9	1377693
61	94.33	444.28	370	531	41907.9	775265
62	145.74	540.89	361	944	78826.3	1458227
63	144.71	599.14	368	989	86700.8	1603899
64	217.09	497.26	351	868	107950	1996985
65	142.38	548	372	918	78026.2	1443426
66	88.98	441.86	375	569	39314.9	727297
67	95.68	434.12	361	653	41536.7	768397
68	68.33	481.81	368	634	32920.7	609009
69	72.98	459.51	386	607	33532.8	620332
70	122.65	483.58	386	1281	59312.9	1097244
71	85.68	477.43	378	624	40905.9	756728
72	143.79	466.52	382	799	67081.3	1240953
74	88.65	436.73	372	596	38716.7	716230
75	139.19	503.13	375	899	70033	1295558
76	81.68	448.15	356	694	36604.5	677156
77	132.06	540.64	378	1032	71397.1	1320792
78	74.49	457.23	370	552	34059	630066
79	154.28	851.6	419	2402	131382	2430465
80	99.46	628.26	365	1043	62489	1155999
81	102.17	499.75	368	735	51057.8	944531
82	69.3	443.41	357	727	30728.6	568456
83	150.76	720.32	422	1564	108597	2008959
84	73.68	453.91	394	584	33443.2	618675
85	84.22	463.81	372	819	39061.6	722611
86	112.87	489.47	359	826	55246	1022009
87	140.65	523.32	378	910	73607.8	1361688
88	70.27	499.76	367	807	35119.4	649683
89	147.79	739.75	408	1770	109328	2022483
90	44.7	412.67	346	715	18448.4	341282
91	139.52	459.05	368	658	64046.8	1184818
92	70.27	590.55	411	1295	41499.8	767716
93	94.87	441.35	355	649	41870.2	774568
94	94.92	479.67	363	600	45531.5	842298
95	68.16	414.73	347	506	28270.2	522977
96	126.28	610.94	347	1124	77146.3	1427149
97	141.68	485.17	383	831	68739.8	1271634
98	183.58	476.62	338	739	87495.7	1618605
99	72.98	484.22	368	751	35336.3	653695
100	76.33	466.94	353	760	35640	659314
101	62.71	490.53	363	780	30759	569018
102	54.38	526.58	359	730	28636	529744
103	54.38	460.5	374	1047	25042.4	463265
1	77.19	455.07	350	771	35127.9	649840
2	12.27	639.97	475	924	7852.97	145274
3	46.22	477.98	337	618	22091.1	408669
4	83.14	390.71	324	507	32482.9	600910
5	109.14	493.83	340	805	53895.9	997034
6	115.14	548.04	350	889	63100.7	1167316
7	83.35	567.54	384	1331	47307.2	875147
8	57.3	426.53	344	579	24440	452121
9	181.09	540.28	366	1167	97839.1	1809950
11	60.81	535.41	396	838	32560	602335
12	122.98	580.15	352	1109	71345.3	1319834
13	75.57	509.5	372	1551	38503.1	712278
14	121.14	443.5	361	582	53726.1	993892
15	110.06	543.54	351	935	59821	1106643
16	79.08	403.01	346	477	31871.5	589598
17	69.3	502.1	377	1511	34795.7	643695
18	40.7	470.66	358	717	19157.9	354407
19	140.82	452.06	371	787	63657.5	1177616
20	66.22	470.77	386	769	31173.9	576693
21	71.25	424.24	350	782	30225.4	559148
22	115.3	542.97	361	975	62605.6	1158156
23	134.49	428.88	359	704	57681.3	1067061
24	129.79	458.27	350	783	59478.1	1100300
25	73.62	479.74	388	845	35320.7	653407
26	117.46	573.25	356	1147	67336.6	1245676
27	83.19	391.14	341	443	32539.7	601960
28	61.46	464.66	381	748	28558.7	528314
29	112.98	440.19	368	836	49731.7	919999
30	78.44	469.22	376	688	36803.8	680843
31	96.33	485.36	387	1105	46754.3	864919
32	67.19	460.05	386	826	30911.7	571843
33	113.3	489.97	356	958	55514	1026967
34	142.76	551.26	388	1404	78699.2	1455876
35	117.14	489.09	343	992	57292.5	1059868
36	74.33	423.05	346	638	31444.2	581695
37	100.17	449.67	377	746	45041.7	833237
38	60.49	522.53	364	819	31607.3	584711
39	111.95	445.39	366	898	49861.6	922402
40	72.22	584.74	378	1465	42229.6	781216
41	53.68	454.77	345	776	24411.3	451590
42	107.79	460.92	367	1000	49682.1	919082
43	119.25	602.85	369	2159	71888.8	1329889
44	117.79	469.07	381	646	55251.2	1022105
45	82.44	507.75	381	1298	41857.1	774324
46	48.54	453.85	366	738	22031.1	407558
47	106.98	451.48	366	675	48298.1	893478
48	67.08	424.32	359	527	28464.7	526575
49	70.65	434.19	374	577	30676.1	567485
50	81.84	509.75	386	1192	41718.9	771769
51	84.33	485.5	364	1021	40941.4	757386
52	61.73	432.65	337	713	26708.3	494083
53	80.76	449.66	380	1269	36314.6	671792
54	120.92	484.97	357	754	58644.7	1084883
55	83.79	485.79	354	1117	40703.2	752978
56	203.41	413.67	360	674	84146.3	1556644
57	40.97	395.24	343	518	16194.7	299590
58	112.49	564.96	345	1341	63552.4	1175672
59	72.6	498.87	393	956	36216.6	669980
60	82.71	441.18	365	692	36488.2	675004
61	79.57	556.34	394	980	44268.2	818928
62	124.55	492.89	353	876	61386.9	1135612
63	126.33	507.38	350	1597	64096.8	1185743
64	70.87	416.83	340	536	29539.8	546465
65	88.6	461.49	346	751	40887.5	756388
66	84.38	782.94	387	1191	66066	1222171
67	49.08	413.15	361	461	20278.7	375141
68	5.95	432.27	363	525	2570.37	47550
1	38.7	463.06	375	690	17922.6	331554
2	39.68	521.19	387	880	20679.5	382555
3	20.43	439.61	377	513	8982.58	166171
4	200.17	500.16	351	928	100116	1852075
5	47.52	544.62	430	782	25877.9	478721
6	177.41	449.21	363	641	79695.7	1474310
7	50.54	561.94	421	903	28401.9	525413
8	60.81	419.75	361	684	25526.2	472216
9	97.73	559.02	367	1435	54634.8	1010703
10	129.52	448.82	354	797	58130.6	1075372
11	64.33	452.7	378	701	29120.7	538711
13	57.89	458.11	358	969	26521.8	490634
14	92.81	491.5	377	681	45618.4	843906
15	76.71	479.91	380	689	36811.8	680990
16	63.68	443.43	369	636	28237	522363
17	120.82	546.3	382	943	66001.2	1220973
18	47.79	456.04	365	540	21792	403135
19	70.11	454.17	363	673	31842	589053
20	82.6	483.58	375	788	39942.8	738911
21	75.08	461.31	357	895	34637.3	640765
22	141.95	414.42	347	491	58827.8	1088270
23	55.84	495.42	375	1732	27664	511764
24	170.22	503.76	363	835	85750.8	1586326
25	99.19	508.91	383	809	50480.1	933844
26	134.87	423.05	356	510	57056.6	1055504
27	70.92	487.83	398	799	34597.9	640036
28	65.14	424.82	376	482	27671.6	511904
29	73.52	503.13	388	753	36988.2	684253
30	58.81	467.59	381	727	27500.7	508743
31	110.44	599.44	411	1376	66199.8	1224646
32	212.44	454.3	369	874	96510.9	1785380
33	68.44	558.09	429	1007	38192.7	706536
34	202.55	507.06	380	772	102704	1899949
35	73.25	609.35	415	1209	44632.8	825673
36	114.11	486.5	397	943	55515.9	1027003
37	123.09	430.42	376	515	52978.5	980062
38	42.7	546.27	410	1105	23328.1	431552
39	65.89	476.43	392	638	31394.1	580768
40	86.92	447.59	361	553	38905.7	719727
41	80.87	477.22	401	900	38591.9	713921
42	50.6	504.54	407	868	25528	472249
43	218.66	556.89	397	959	121768	2252611
44	45.62	437.26	372	492	19949.5	369051
45	67.08	520.29	409	682	34902.8	645676
46	70.98	464.65	395	648	32978.9	610085
47	66.44	498.77	389	624	33136.1	612992
48	120.55	615.56	396	1244	74202.9	1372697
49	151.79	697.94	418	1178	105940	1959815
51	56.06	524.41	415	755	29396.5	543814
52	6.38	483.55	401	600	3084.4	57059
53	235.9	798.25	390	2091	188309	3483576
54	79.35	504.47	386	761	40032.1	740563
55	60.43	479.57	383	974	28982.5	536154
56	83.03	509.67	400	869	42318	782852
57	51.3	456.8	392	749	23433.3	433499
58	65.73	471.62	402	609	31000.8	573491
59	56.98	474.83	383	925	27053.5	500470
60	70.81	434.86	375	853	30794	569665
61	68.06	452.72	376	645	30810.6	569973
62	130.65	447.39	358	704	58453.7	1081350
63	218.6	713.92	381	1512	156064	2887074
64	67.84	449.88	381	604	30520	564597
65	100.98	597.41	354	1366	60325	1115967
66	56.76	530.34	407	1204	30101.4	556853
67	52.22	489.8	402	715	25576.3	473143
68	64.71	492.61	389	676	31874.7	589657
69	160.06	444.24	360	659	71104.5	1315380
70	5.3	417.53	378	468	2211.87	40918
71	70.81	435.64	378	512	30849.4	570690
72	66.38	463.4	386	667	30760.8	569052
73	112.65	569.55	372	1244	64161.3	1186936
74	119.52	456.42	382	636	54550.5	1009143
75	74.87	440.21	377	535	32957.3	609685
76	107.95	602.43	385	1347	65032.1	1203044
77	72.44	449.4	369	637	32552.7	602200
78	75.73	479.93	343	599	36346.4	672382
79	75.79	418.71	369	560	31732.6	587030
80	74.17	452.57	375	748	33564.7	620922
81	74.54	428.68	378	627	31955	591144
82	113.52	533.83	383	1227	60598.8	1121033
83	64.16	500.25	387	887	32098.5	593799
84	64.87	450.19	361	527	29203	540233
85	74.76	452.08	366	868	33797.5	625229
86	47.3	1256.48	676	2636	59430.5	1099419
87	107.03	511.55	364	810	54752.2	1012875
88	60.16	455.4	377	899	27399.2	506865
89	77.62	484.19	382	692	37585.2	695297
90	67.52	448.68	381	766	30293	560398
91	62.98	573	405	1005	36084.9	667543
92	91.79	567.89	401	1183	52125.5	964282
93	81.73	451.12	361	617	36871.5	682095
94	160.66	476.97	377	1022	76627.9	1417558
95	56.49	528.78	396	775	29870.2	552577
96	124.28	462.78	356	779	57512	1063929
97	68.76	428.89	359	626	29490.1	545545
98	59.73	424.11	363	501	25332.8	468638
99	80.6	452.6	373	717	36478.7	674828
100	102.65	532.53	395	774	54665.8	1011277
101	79.62	442.42	379	523	35227.4	651681
102	61.3	417.6	358	472	25599.1	473564
103	96.11	493.23	404	827	47405.2	876961
104	97.41	451.94	372	639	44022.8	814388
105	184.82	456.88	371	647	84439.1	1562059
106	99.36	615.03	419	1287	61106.9	1130431
107	90.11	424.93	377	651	38291.4	708362
108	95.95	505.51	365	910	48503.9	897285
109	625	913.27	389	3677	570790	10559185
110	46.76	673.83	435	2205	31507.4	582863
111	80.81	471.36	365	836	38092.9	704690
112	51.08	385.22	341	451	19678.1	364030
113	95.95	438.38	366	732	42062.8	778131
114	62.16	441.43	378	621	27441.4	507646
115	57.25	435.5	374	544	24930.3	461192
116	104.6	443.5	342	798	46389.6	858173
117	127.95	517.77	360	869	66248.8	1225553
118	78.98	456.76	370	694	36073.5	667332
119	75.35	457.09	387	741	34443.9	637186
120	52.16	427.74	363	481	22313	412773
121	64.6	543.87	390	1894	35132.3	649922
122	123.73	526.65	357	1061	65164.6	1205496
123	69.46	433.84	339	523	30135.7	557488
124	100.27	531.47	354	1379	53292.4	985869
125	54.76	438.55	373	537	24014.4	444248
126	130.87	475.59	353	1015	62240.8	1151409
127	58.16	487.22	381	606	28339.2	524254
128	57.25	457.14	375	748	26169.3	484113
129	120.28	465.88	372	744	56033.7	1036582
130	55.35	426.91	367	491	23631.2	437160
131	38	413.39	362	605	15709.4	290612
132	73.08	430.79	359	517	31484	582431
133	146.33	475.15	378	892	69528.9	1286233
134	56.65	400.41	359	451	22683.5	419627
135	63.14	431.11	348	595	27219.4	503538
136	45.89	468.23	367	1346	21488.8	397527
137	50.11	425.19	371	502	21306.5	394155
138	34	409.41	363	476	13920.5	257518
139	14.76	431.06	369	553	6361.29	117679
140	15.3	576.25	417	769	8815.39	163078
1	66.06	429.1	336	778	28344.9	524359
2	169.47	519.41	354	926	88022.6	1628351
3	54.65	486.31	373	851	26577.1	491656
4	126.11	452.43	353	843	57056.9	1055509
5	87.68	1083.96	508	1798	95041.1	1758188
6	344.34	583.48	394	1027	200914	3716754
7	106.49	576.33	401	1017	61373.8	1135370
8	131.14	430.52	360	999	56458.7	1044443
9	65.95	435.81	370	535	28741.3	531692
10	128.82	427.58	366	787	55079.1	1018922
11	120.22	504.92	378	883	60702	1122941
12	54.43	444.2	348	514	24180.1	447313
13	117.68	405.66	340	582	47738.6	883129
14	59.95	453.05	381	541	27159.5	502431
15	67.08	457.78	365	955	30709.7	568107
16	169.9	443.82	355	634	75404.5	1394926
17	67.35	439.46	367	608	29599.2	547563
18	130.33	432.61	348	863	56382.2	1043029
19	117.9	569.89	395	1472	67188.1	1242929
20	109.46	582.37	393	1469	63748.1	1179291
21	32.54	473.24	382	700	15400	284888
22	114	527.07	373	1290	60088	1111583
23	61.89	449.54	374	540	27824	514723
24	46.97	460.43	385	790	21628.8	400116
25	68.98	419.97	359	560	28967.8	535882
26	54.49	583.41	413	1321	31789	588073
27	144.98	793.54	476	1439	115046	2128263
28	43.52	479.72	393	600	20875	386172
29	56.71	578.31	393	3415	32792.9	606644
30	106.49	438.4	377	604	46686	863656
31	128.71	584.99	409	1745	75292.6	1392856
32	188.76	502.86	375	1224	94921.9	1755983
33	113.63	473.89	364	724	53846.8	996126
34	51.14	446.99	380	822	22857.8	422852
35	58.33	423.59	365	732	24706.6	457054
36	57.52	490.01	390	996	28183.4	521371
37	99.36	481.62	358	692	47851.3	885214
38	62.65	464.69	385	973	29113.5	538578
39	54.38	491.3	404	718	26717.4	494252
40	109.3	552.13	402	922	60349.1	1116413
41	53.73	467.16	374	607	25101.2	464354
42	51.79	431.24	358	572	22332.4	413132
43	112.49	557.13	403	1157	62671.8	1159382
44	70.65	502.36	397	706	35492.8	656590
45	59.89	529.5	415	949	31713.9	586683
46	155.63	635.46	392	1059	98896.1	1829503
47	196.6	520.4	358	1152	102313	1892707
48	124.17	453.81	366	937	56347.9	1042393
49	132.22	453.78	365	716	59999	1109937
50	120.44	461.79	363	834	55617.2	1028876
51	111.73	476.46	377	766	53236.7	984839
52	118.11	578.13	412	1175	68284.6	1263214
53	47.84	458.88	378	569	21952.5	406105
54	57.84	572.82	421	1356	33131.9	612916
55	67.03	446.48	389	629	29927.7	553640
56	151.84	454.12	364	871	68955.8	1275630
57	75.25	470.86	387	746	35430.6	655439
58	49.68	486.64	391	740	24175.2	447224
59	55.46	413.02	342	897	22906.9	423760
60	104.98	529.54	380	817	55589.4	1028363
61	124.11	658.15	430	1476	81685.2	1511115
62	107.9	510.1	390	944	55037.8	1018157
63	176.76	519.3	371	1089	91793.5	1698110
64	98.44	505.61	389	787	49770.1	920709
65	93.25	482.94	371	703	45032.5	833068
66	110.17	494.31	363	1353	54456.5	1007405
67	127.73	436.86	375	625	55802.9	1032311
68	72.17	500.82	400	904	36141.6	668593
69	99.41	480.15	377	707	47731.2	882991
70	56.22	442.02	367	623	24849.9	459704
71	272.71	480.09	372	1093	130926	2422037
72	82.17	505.84	398	677	41562.2	768870
73	23.51	394.4	340	590	9274.05	171563
74	59.03	525.67	416	941	31029.8	574028
75	594.46	590.3	379	2885	350909	6491544
76	57.03	432.75	367	612	24679.7	456556
77	113.3	492.25	366	876	55772.8	1031754
78	97.73	491.21	382	863	48007.9	888111
79	63.41	426.55	362	540	27047	500349
80	54.43	499.66	387	747	27198.7	503156
81	64.06	454.83	367	3024	29134.9	538973
82	114.98	456.19	366	728	52451.8	970319
83	71.46	448.69	372	791	32064.3	593166
84	76.22	446.52	375	755	34033.8	629600
85	66.71	411.32	351	613	27437.2	507567
86	111.36	460.28	367	668	51254.7	948173
87	37.35	388.97	339	432	14529	268775
88	68.27	427.02	367	754	29154.1	539329
89	66.87	468.93	396	908	31356	580063
90	174.12	508.64	353	1154	88561.6	1638323
91	63.19	462.4	386	780	29220.1	540550
92	66.22	487.26	391	823	32266	596896
93	33.79	425.78	368	485	14385.1	266113
94	77.35	470.67	394	707	36408.2	673524
95	56.16	606.81	412	1303	34081	630473
96	117.57	451.49	352	682	53082.3	981982
97	78.6	427.71	371	638	33617.1	621891
98	112.55	546.41	373	1401	61496.2	1137634
99	65.25	438.2	367	623	28590.7	528906
100	103.36	515.16	385	994	53244.5	984984
101	80.38	432.81	366	560	34789.7	643583
102	94.65	455.5	356	1142	43114.5	797586
103	90.33	612.65	374	941	55339.3	1023735
104	74.92	443.4	383	771	33220.1	614546
105	66.22	425.4	364	499	28169.8	521120
106	90	442.64	346	620	39839.6	737002
107	59.79	502.6	390	1355	30048.8	555881
108	18.43	486.1	414	568	8960.42	165761
109	91.41	677.91	394	1388	61967.2	1146346
110	61.35	449.21	374	964	27560.7	509853
111	66.44	562.46	403	1451	37366.9	691260
112	66.49	422.21	346	611	28072.2	519314
113	30.81	414.02	356	561	12756.9	235993
114	232.55	524.27	377	907	121920	2255430
115	63.46	417.9	352	668	26521	490619
116	60.27	494.32	392	1041	29794.2	551171
117	75.19	429.92	373	650	32326.7	598019
118	211.47	578.04	357	1348	122238	2261311
119	68.71	441.91	372	891	30361.9	561673
120	99.9	603.18	388	1141	60255.2	1114676
121	120.17	674.52	432	2013	81055.1	1499459
122	55.52	397.44	333	485	22064.4	408175
123	51.52	420.28	361	706	21651.1	400529
124	105.52	543.9	379	1003	57391.6	1061702
125	79.95	568.94	368	1006	45486.1	841458
126	57.84	436.87	371	784	25268.7	467451
127	26.54	434.11	372	677	11521.9	213146
128	22.7	567.4	394	1023	12881.9	238306
129	9.78	437.27	393	548	4278.28	79145

## Sheet: BRCA2 NT 
	Area	Mean	Min	Max	IntDen	RawintDean
1	8.38	433.08	383	482	3628.69	67128
2	84.6	399.93	328	525	33833.4	625893
3	112.44	403.58	326	518	45376.8	839437
4	153.63	413.52	337	565	63528.2	1175223
5	82.38	386.99	333	467	31880.9	589773
6	98.81	436.68	367	799	43150.5	798251
7	93.46	429.68	369	709	40159.2	742915
8	81.25	390.64	326	610	31738.5	587138
9	117.36	387.8	339	653	45510.9	841918
10	113.03	532.47	415	824	60185.6	1113389
11	207.58	438.35	341	656	90990	1683246
12	88.33	509.9	410	1058	45038.4	833176
13	97.36	483.72	377	825	47092.2	871171
14	100.6	456.68	357	612	45941.7	849887
15	147.03	541.36	370	1135	79598.3	1472509
16	106.17	512.24	395	918	54383.2	1006048
17	109.25	458.09	384	561	50045	925795
18	100.49	569.31	394	1069	57209.9	1058340
19	97.36	487.26	365	942	47436.9	877547
20	105.95	464.12	373	596	49173.8	909678
21	126.6	463.26	367	618	58648.1	1084945
22	106.17	513.49	401	930	54515.4	1008494
23	126.38	395.16	334	570	49941.7	923883
24	61.03	436.16	374	673	26618.6	492424
25	48.33	473.14	407	545	22865.3	422991
26	80.17	498.97	376	917	40000.4	739977
27	52.87	533.46	395	835	28202.4	521723
28	86.54	505.48	386	674	43746.6	809279
29	92.27	474.71	384	651	43803.5	810332
30	104.76	420.87	366	538	44090.3	815638
31	186.01	1528.58	498	3003	284327	5259844
32	75.73	480.19	395	801	36366.4	672751
33	118.49	527.27	431	777	62477.2	1155782
34	83.95	494.46	393	646	41510	767904
35	81.62	489.42	400	762	39949.1	739028
36	126.71	469.22	375	774	59454.4	1099861
37	104.54	564.89	402	892	59056.7	1092504
38	121.9	556.82	412	919	67874.8	1255633
39	84.81	398.48	352	482	33796.7	625213
40	51.89	435.46	354	769	22597.7	418040
41	90.17	388.59	318	602	35037.9	648174
42	96.65	384.83	321	509	37194.6	688072
43	72.92	550.94	395	904	40175.4	743214
44	96.06	550.46	406	1031	52875.9	978164
45	62.98	435.27	351	824	27411.5	507093
46	58.6	452.81	371	582	26533.3	490846
47	139.14	533.61	382	1014	74247.1	1373515
48	101.84	380.83	320	516	38784.8	717490
49	83.08	376.93	327	491	31317.1	579342
50	97.41	565.44	434	897	55079.2	1018923
51	40.16	466.2	390	593	18724.5	346389
52	73.89	400.65	348	456	29606.3	547695
53	79.84	654.12	443	1027	52225.7	966136
54	68	394.72	340	511	26841.8	496554
55	128.33	403.31	315	524	51756.1	957449
56	35.79	412.57	370	475	14763.8	273119
57	112.55	475.94	360	726	53565.2	990915
58	85.9	397.6	328	506	34151.6	631779
59	55.03	551.91	396	772	30371.2	561844
60	66.65	355.53	315	415	23696.7	438371
61	9.08	410.39	373	453	3726.96	68946
1	31.08	436.91	387	502	13580.1	251222
2	101.36	417.76	328	731	42341.8	783291
3	113.09	395.3	329	499	44702.8	826969
4	58.87	379.96	338	451	22367.5	413781
5	174.98	394.47	333	689	69024.1	1276893
6	159.57	421.73	347	876	67297.2	1244948
7	79.25	438.73	372	535	34768.1	643183
8	145.63	392.95	345	449	57224.3	1058607
9	108.71	514.01	399	884	55876.7	1033676
10	118.55	398.94	346	467	47292.3	874873
11	54.7	503.29	413	662	27532.6	509333
12	83.41	426.6	369	625	35582	658240
13	171.74	399.89	350	507	68675.4	1270443
14	60.76	479.88	376	795	29157.2	539386
15	39.62	653.6	452	1220	25897.9	479092
16	55.84	561.89	452	925	31376.1	580435
17	43.03	430.61	382	539	18528.5	342763
18	98.81	511.72	371	800	50565.2	935419
19	50.49	828.22	445	2032	41815.8	773561
20	29.84	516.82	383	654	15421.4	285285
21	101.09	546.07	380	978	55199.5	1021149
22	50.43	446.45	388	567	22516.6	416541
23	47.57	512.31	377	666	24370.3	450832
24	71.41	631.65	376	1219	45105.1	834411
25	53.79	480.95	393	595	25868.3	478544
26	48.38	453.81	377	519	21955.3	406156
27	32.81	492.6	386	619	16163.3	299009
28	31.57	472.67	389	561	14921.5	276037
29	112.49	671.67	492	1444	75557.1	1397749
30	78.27	412.29	350	549	32271.6	597001
31	64.27	417.42	346	633	26828.9	496314
1	80.38	460.32	374	819	37000.9	684489
2	50.43	423.1	364	508	21338.6	394748
3	117.63	483.25	378	977	56843.2	1051557
4	128.82	483.9	348	956	62334.3	1153138
5	88.06	540.16	360	1056	47565.1	879919
6	41.35	469.15	365	545	19400.6	358897
7	110.11	550.89	363	1273	60660.1	1122166
8	92.65	484.32	359	707	44873.1	830118
9	123.68	423.24	334	736	52346.6	968373
10	69.35	388.2	343	438	26923.1	498057
11	93.79	419.51	365	575	39344.7	727847
12	123.41	560.39	369	1271	69157.8	1279368
13	100.06	627.53	362	1242	62789.4	1161557
14	111.9	430.47	362	665	48168.1	891073
15	188.55	484.59	361	1257	91367.9	1690237
16	101.95	459.55	380	550	46851.6	866719
17	396.66	471.55	367	856	187047	3460227
18	85.79	433.57	345	587	37194.9	688078
19	123.14	447.37	355	951	55089.5	1019115
20	158.93	452.54	362	684	71919.7	1330460
21	196.49	451.77	373	710	88770.7	1642192
22	59.57	495.75	386	846	29531.7	546315
23	160.17	497.94	365	2045	79754.6	1475400
24	57.73	509.24	380	1253	29399.5	543869
25	64.54	473.78	382	790	30579.1	565691
26	104.54	439.79	363	674	45978.1	850561
27	93.36	826.72	385	1665	77178.5	1427745
28	39.19	521.21	379	696	20426.7	377878
29	41.35	511.05	368	663	21133.4	390952
30	117.68	567.26	384	1111	66755	1234917
31	101.57	442.04	359	697	44898.9	830596
32	65.52	443.43	360	825	29051.6	537432
33	75.84	454.7	368	764	34484.8	637942
34	98.92	565.42	340	1289	55932.8	1034715
35	65.03	434.07	343	659	28227.2	522182
36	94.22	467.18	377	727	44017.5	814291
37	78.11	499.43	372	871	39010.9	721673
38	42.6	411.86	357	547	17543.7	324546
1	58.81	466.98	376	749	27464.3	508069
2	56.38	610.53	384	835	34422	636781
3	145.2	547.62	381	1287	79512.2	1470916
4	38.27	557.92	415	694	21352.5	395006
5	63.19	438.68	384	526	27721.2	512822
6	82.44	524.44	382	741	43232.5	799769
7	40.33	443.25	375	520	17874.6	330667
8	53.89	478.48	402	646	25787	477041
9	64.76	431.82	327	510	27964.7	517325
10	49.14	578.21	405	872	28411.5	525591
11	91.36	425.45	359	591	38867.4	719017
12	92.65	513.63	387	693	47588.6	880354
13	77.19	480.66	398	642	37103.4	686385
14	105.41	401.76	349	541	42349.3	783431
15	108.92	481.44	386	681	52440.4	970108
16	46.33	541.56	422	1076	25088.2	464113
17	46.65	551.91	440	1702	25747	476300
18	88.92	424.06	358	610	37708.8	697585
19	44.11	553.7	375	1229	24423.9	451823
20	68.71	433.66	378	492	29795.1	551187
21	42.38	550.6	390	862	23334.5	431671
22	237.36	516.55	370	1300	122608	2268152
23	58.16	485.05	405	886	28212.8	521916
24	52.06	476.83	403	696	24821.9	459186
25	59.46	511.02	411	605	30385.9	562117
26	109.68	852.21	369	2251	93470.5	1729134
27	125.09	519.86	347	809	65027.7	1202963
28	53.95	473.67	409	794	25553.4	472719
29	77.25	490.65	369	899	37900.8	701137
30	123.52	407.81	346	511	50371.6	931837
31	47.14	485.02	392	845	22862.3	422936
32	118.49	420	348	526	49766.3	920640
33	38.76	550.17	395	942	21323.8	394474
34	31.95	530.02	439	847	16932.6	313241
35	144.49	624.04	425	1145	90168.7	1668054
36	100.06	416.8	353	548	41704.7	771506
37	256.61	1286.71	446	2282	330175	6107993
38	120.76	412.32	342	532	49792.1	921116
39	191.74	728.76	434	2835	139730	2584906
40	182.06	684.19	437	1246	124565	2304351
41	38	407.1	335	536	15470.3	286189
42	34.54	495.68	402	910	17121.9	316742
43	33.41	505.52	384	870	16887.8	312412
44	115.03	531.97	395	935	61192.9	1132022
45	24.06	433.43	364	655	10426.1	192875
1	70.65	432.41	379	588	30550.3	565157
2	173.25	408.63	359	488	70795.6	1309665
3	117.57	530.34	366	750	62353.8	1153499
4	260.5	502.5	379	630	130900	2421560
5	149.25	406.63	355	503	60688.7	1122696
6	137.74	506.06	372	581	69702.4	1289441
7	92.98	456.27	386	511	42422.2	784779
8	135.03	464.33	367	564	62699.6	1159895
9	112.44	443.17	377	515	49828.3	921787
10	211.36	493.25	390	640	104253	1928610
11	158.49	483.65	372	589	76654.9	1418059
12	76.27	489.4	380	1212	37327.8	690537
13	80.22	428.56	380	527	34379.2	635989
14	278.01	471.01	368	948	130945	2422379
15	139.63	428.25	360	526	59795.7	1106175
16	63.73	488.07	370	690	31105.5	575429
17	93.9	517.51	368	753	48592.3	898921
18	157.84	476.35	377	900	75188.9	1390939
19	72.81	461.39	380	639	33595.4	621490
20	222.12	431.73	375	546	95894.2	1773971
21	82	477.73	384	591	39175.7	724721
22	168.55	488.13	376	584	82272.9	1521987
23	77.52	458.16	383	592	35514.7	656996
24	260.66	488.58	393	661	127352	2355916
25	241.42	453.07	390	652	109378	2023410
26	22.81	413.63	368	458	9435.57	174551
27	80.22	425.64	369	536	34144.4	631646
28	85.57	460.04	377	625	39366.5	728250
29	137.9	513.2	383	651	70769.2	1309178
30	149.36	2213.21	514	4095	330559	6115100
31	131.68	839.88	441	1526	110596	2045941
32	112.6	802.93	449	1348	90409.6	1672509
1	109.03	448.61	390	514	48912.3	904840
2	87.08	413.62	355	476	36019.6	666336
3	80.11	403.31	346	489	32309.8	597707
4	46.65	451.17	379	566	21047.6	389364
5	45.46	458.59	402	522	20848.3	385678
6	143.25	464.97	388	558	66606.8	1232176
7	111.3	441.47	371	577	49136.2	908982
8	35.35	415.64	368	479	14694.1	271830
9	102.76	407.2	333	481	41844.2	774087
10	117.52	433.81	335	531	50980.3	943098
11	122.65	493.32	369	773	60506.9	1119333
12	125.79	458.33	358	582	57652.6	1066529
13	137.36	447.27	371	557	61436	1136520
14	67.57	499.74	389	634	33767.5	624674
15	100.06	442.23	355	588	44249	818573
16	148.49	526.36	379	1033	78159.8	1445898
17	87.73	466.84	384	555	40957.3	757680
18	143.41	473.45	375	652	67897.5	1256052
19	107.09	479.93	379	606	51393.3	950738
20	83.25	436.29	374	490	36319.8	671890
21	116.22	476.33	366	621	55359.6	1024111
22	137.41	496.97	352	755	68288.9	1263293
23	134.98	499.91	394	685	67477.1	1248276
24	76.65	485.47	382	559	37212.4	688402
25	77.46	436.2	367	504	33789.3	625076
26	237.9	493.31	354	683	117358	2171039
27	165.95	475.42	361	673	78897	1459536
28	65.41	429.87	365	578	28116.7	520137
29	83.84	465.56	346	671	39032.7	722076
1	12.32	440.49	379	500	5428.92	100431
2	83.25	367.72	316	498	30611.1	566283
3	119.57	413.32	347	500	49421.1	914253
4	66.92	451.25	384	526	30198.4	558647
5	65.35	438.03	370	584	28627.1	529580
6	61.08	455.15	396	528	27802.4	514323
7	71.57	442.11	376	529	31641.7	585348
8	58.33	506.74	392	889	29556.6	546775
9	96.22	458.62	372	775	44128.6	816345
10	58.16	505.42	369	737	29397.6	543834
11	56.43	486.41	381	710	27450.5	507813
12	160.66	438.1	373	636	70383.7	1302046
13	54.6	450.17	388	604	24577.9	454672
14	59.14	584.95	434	985	34592.3	639932
15	181.63	492.06	374	1114	89372.6	1653325
16	76.98	440.5	360	505	33907.6	627265
17	129.36	556.72	369	893	72015	1332224
18	125.9	507.98	387	1110	63952.7	1183077
19	147.47	452.14	356	906	66675.3	1233443
20	114	422.65	337	635	48183.5	891359
21	71.95	493.43	394	1020	35501.8	656756
22	124.82	494.48	360	845	61718.7	1141750
23	88.22	404.71	331	530	35703.3	660485
24	106.82	402.6	337	461	43003.8	795537
1	38.92	450.25	393	626	17524	324180
2	123.9	516.88	394	1031	64040.4	1184699
3	82.76	413.17	342	478	34193.8	632560
4	37.14	451.9	388	531	16782.1	310456
5	136.6	470.27	387	558	64238.6	1188366
6	101.3	538.49	396	962	54549.7	1009129
7	110.65	763.69	432	1140	84504.3	1563266
8	113.57	597.41	385	974	67849.3	1255161
9	94.44	643.25	436	1022	60746.2	1123760
10	138.82	441.89	370	509	61341.4	1134769
11	49.41	452.96	381	508	22379.7	414008
12	120.11	470.37	375	547	56497.5	1045162
13	136.17	457.34	374	632	62275.2	1152045
14	30.87	437.58	387	486	13506.4	249859
15	132.38	447.12	374	519	59191.7	1095002
16	56.87	471.21	399	547	26796.5	495716
17	96.92	478.94	379	701	46420.3	858740
18	140.71	501.53	396	876	70570.1	1305494
19	9.89	436.58	395	480	4318.77	79894
20	100.11	512.19	404	650	51276.7	948581
21	38.7	539.33	419	803	20874.4	386161
22	259.79	455.63	371	657	118370	2189758
23	97.95	465.74	366	702	45618.8	843914
24	52.87	423.93	366	476	22412	414606
25	111.19	423.81	356	590	47125.1	871779
26	68.38	432.94	327	517	29605.3	547675
27	48.7	496.55	402	873	24184.3	447392
28	95.68	442.33	340	632	42322.2	782929
29	54.6	484.46	421	563	26449.9	489304
30	99.03	467.22	372	618	46269.7	855954
31	90.49	694.24	382	1246	62821.8	1162156
32	47.89	468.44	405	531	22435.6	415042
33	70.44	509.5	374	707	35887	663883
34	51.95	477.02	385	722	24780.1	458413
35	81.14	470.39	383	679	38166.9	706059
36	51.3	471.98	395	918	24212.1	447905
37	65.68	795.42	442	1291	52241.9	966436
38	111.9	623.52	461	917	69769.3	1290680
39	58.71	512.83	398	1182	30105.6	556931
40	56.65	462.55	394	675	26203.7	484749
41	100.49	582.58	414	1044	58544.1	1083022
42	46.92	562.38	404	742	26387.2	488144
43	59.08	516.73	422	619	30530.1	564784
44	43.62	497.71	398	705	21711.6	401648
45	69.3	428.58	356	551	29700.8	549442
46	50.92	518.98	425	603	26426.8	488876
47	72	449.14	378	516	32339.5	598257
48	57.84	472.84	396	544	27348.9	505934
49	91.63	526.81	343	789	48269.3	892945
50	64.38	448.71	393	517	28888.2	534409
51	112.11	417.52	351	499	46809.2	865935
52	200.33	404.88	345	476	81110.6	1500486
53	131.19	410.33	356	484	53832.8	995867
54	100.11	432.75	368	508	43323.5	801453
55	66.22	421.19	355	502	27890.5	515953
1	85.03	511.9	351	823	43527.3	805223
2	168.28	461.22	346	658	77612.1	1435766
3	32.87	514.4	408	801	16906.3	312754
4	88.49	417.27	356	581	36923.9	683064
5	47.03	432.24	370	714	20328	376052
6	119.41	405.5	332	556	48421.4	895759
7	83.95	411.81	337	491	34571	639538
8	121.79	498.62	361	728	60725.9	1123384
9	57.35	512.96	397	787	29420.3	544253
10	99.79	406.67	327	690	40580.9	750717
11	53.62	412.23	342	518	22105.1	408928
12	206.98	520.71	365	860	107778	1993806
13	83.73	578.64	388	1272	48451.2	896310
14	41.08	437.32	364	599	17966.3	332364
15	102.49	395.15	328	754	40499.4	749208
16	90.17	402.24	334	525	36267.8	670928
17	45.08	489.42	402	639	22064.4	408175
18	145.03	521.56	363	819	75642.8	1399334
19	48.7	405.85	359	526	19766.7	365669
20	79.35	431.08	346	659	34208.4	632830
21	49.08	392.7	345	442	19274.9	356571
22	46.11	495.13	388	1093	22830.5	422348
23	90.49	576.69	368	1066	52185	965384
24	112.27	679.34	466	1282	76272.9	1410992
25	55.41	467.3	375	806	25891.9	478980
26	47.95	507.68	396	606	24342.1	450311
27	104.76	548.32	379	1316	57442.4	1062642
28	45.68	485.78	404	567	22189.2	410483
29	76.65	556.76	387	1254	42676.4	789482
30	99.46	426.44	340	670	42415.1	784648
31	51.35	579.43	437	1304	29755.5	550455
32	92.92	510.74	387	937	47459.8	877970
33	46.54	516.85	429	643	24055.4	445006
34	78.81	413.1	336	518	32557.8	602295
35	43.89	420.6	350	491	18461.7	341527
36	5.08	402.57	357	433	2045.6	37842
37	107.46	408.63	343	629	43912.4	812347
38	80.17	618.66	394	976	49595	917471
39	47.57	448.62	381	533	21340.8	394789
40	121.46	523.28	397	694	63559.4	1175801
41	92.22	469.64	355	735	43310	801202
42	324.07	506.6	379	783	164172	3037054
43	100.06	502.03	400	692	50231.9	929252
44	44.38	481.52	397	787	21369.9	395327
45	86.76	581.61	395	1840	50460.9	933489
46	99.52	474.94	380	784	47264.5	874358
47	67.41	503.1	411	624	33913.3	627370
48	51.84	482.38	392	574	25006.8	462607
49	72.76	463.6	399	635	33731.5	624008
50	237.58	1111.7	418	2557	264115	4885927
51	117.14	446.76	366	550	52333.4	968129
52	5.73	544.55	423	1200	3120.23	57722
53	90.98	437.42	357	554	39794.6	736171
54	126.01	1071.1	621	2185	134964	2496727
55	70.44	467.67	356	665	32940.5	609374
1	114.33	495.53	364	797	56654	1048056
2	76.27	438.43	374	592	33440.9	618631
3	66.76	491.67	410	732	32823.8	607216
4	118	540.91	365	831	63830.1	1180808
5	56.22	545.62	367	920	30673.8	567443
6	98.22	564.92	335	1077	55486.7	1026463
7	122.28	462.11	368	856	56504.1	1045284
8	138.6	578.09	372	1388	80123.8	1482230
9	108.06	517.06	374	1157	55872.4	1033598
10	120.28	504.93	352	1164	60730	1123459
11	128.28	529.71	381	956	67949.3	1257011
12	132.17	501.1	381	1027	66229.7	1225200
13	142.38	483.02	371	1025	68773.8	1272263
14	56.27	477.47	336	1014	26868.6	497049
15	117.95	517.32	342	1194	61018.1	1128789
16	69.79	543.12	344	1750	37902.5	701168
17	37.08	510.62	341	729	18934.9	350282
18	107.19	498.1	377	737	53393.4	987737
19	173.95	487.9	338	864	84871.6	1570060
20	116.44	498.58	367	729	58052.7	1073931
21	65.46	465.72	360	652	30487.3	563992
22	74.65	489.59	362	1659	36548.5	676120
23	83.52	514.43	369	773	42963.3	794788
24	110.55	507.71	401	1008	56124.3	1038257
25	101.3	496.43	405	940	50288.6	930302
26	73.03	606.17	398	1306	44268.5	818934
27	83.95	524.87	381	789	44062.3	815120
28	245.63	550.92	367	1260	135324	2503392
29	100	527.67	388	1048	52768.7	976182
30	119.63	453.73	366	670	54277.6	1004094
31	135.19	494.63	363	851	66871.4	1237071
32	127.79	489.23	369	842	62517.8	1156532
33	288.55	462.09	358	813	133336	2466624
34	94.49	563.42	374	1022	53237.4	984852
35	88.54	500.57	351	998	44322.4	819932
36	57.3	559.41	357	1783	32054	592975
37	186.6	504.17	358	892	94079.7	1740404
38	91.46	554.45	366	1053	50712.1	938136
39	106.49	471.65	383	623	50226.4	929150
40	140.01	531.26	363	1021	74379.2	1375959
41	235.41	476.24	353	723	112113	2074006
42	144.11	497.21	382	836	71654.6	1325556
43	62.33	503.76	363	654	31397.7	580833
44	6.97	471.58	386	602	3288.46	60834
45	75.84	425.44	369	497	32265.7	596892
46	89.3	424.89	368	500	37943	701917
47	88.87	459	367	558	40790.7	754597
48	91.84	400.18	346	465	36753.4	679910
49	114.87	424.94	354	598	48812.4	902992
50	57.89	515.51	363	1313	29844.8	552107
51	10.65	421.33	347	519	4486.78	83002

## Sheet: BRCA2 Fasudil 
	Area	Mean		Min	Max	IntDen	RawintDean
1	149087	540910	540.91	392	1030	80642735	1491830	540.91
2	155195	580868	580.868	435	1172	90148040	1667671	580.868
3	54921	580477	580.477	410	1037	31880484	589765	580.477
4	112924	405049	405.049	343	463	45739534	846147	405.049
5	209144	423610	423.61	362	537	88595437	1638949	423.61
6	117518	393790	393.79	336	447	46277502	856099	393.79
7	70814	468044	468.044	373	575	33143941	613138	468.044
8	57462	544496	544.496	434	1019	31287703	578799	544.496
9	74111	426344	426.344	364	494	31596797	584517	426.344
10	82652	462757	462.757	369	608	38247770	707555	462.757
11	40650	386412	386.412	337	449	15707773	290582	386.412
12	99734	755803	755.803	436	1446	75379116	1394457	755.803
13	106599	426745	426.745	372	490	45490605	841542	426.745
14	88706	441935	441.935	369	506	39202403	725215	441.935
15	117897	539441	539.441	404	659	63598259	1176520	539.441
16	89193	469655	469.655	391	569	41889810	774930	469.655
17	320283	435252	435.252	354	593	139404095	2578871	435.252
18	222225	500297	500.297	359	753	111178625	2056721	500.297
19	198927	533700	533.7	340	1036	106167394	1964017000	533.7
20	64813	509410	509.41	369	665	33016639	610783000	509.41
21	112978	444452	444.452	357	537	50213067	928904000	444.452
22	61678	428395	428.395	358	650	26422641	488799000	428.395
23	116221	603487	603.487	385	1078	70137876	1297498000	603.487
24	354987	448109	448.109	350	617	159072895	2942729000	448.109
25	79949	498807	498.807	396	627	39879188	737735000	498.807
26	63840	415047	415.047	362	463	26496752	490170000	415.047
27	116870	414542	414.542	353	570	48447373	896240000	414.542
28	87950	437875	437.875	371	495	38510916	712423000	437.875
29	102328	417131	417.131	360	691	42684383	789629000	417.131
30	124492	446611	446.611	337	628	55599286	1028545000	446.611
31	65138	400960	400.96	341	584	26117656	483157000	400.96
32	35623	419121	419.121	341	482	14930390	276201000	419.121
33	23677	393400	393.4	335	457	9314378	172309000	393.4
34	98653	473335	473.335	382	614	46695735	863836	473.335
35	130708	442086	442.086	374	588	57784239	1068965	442.086
36	155952	411809	411.809	355	643	64222609	1188070	411.809
37	143087	485638	485.638	377	689	69488499	1285485	485.638
38	74544	465248	465.248	379	582	34681247	641577	465.248
39	121356	445716	445.716	359	691	54090468	1000633	445.716
40	61192	526439	526.439	416	935	32213687	595929000	526.439
41	113951	417149	417.149	352	498	47534417	879351000	417.149
42	123410	409823	409.823	345	486	50576379	935625000	409.823
43	74544	491473	491.473	386	596	36636137	677741000	491.473
44	335527	438676	438.676	355	626	147187871	2722865000	438.676
45	234388	485157	485.157	352	759	113714944	2103641000	485.157
46	60327	469069	469.069	372	573	28297420	523481000	469.069
47	44975	480929	480.929	360	641	21629689	400133000	480.929
48	344987	445819	445.819	344	639	153801924	2845220000	445.819
49	74381	423516	423.516	370	503	31501712	582758000	423.516
50	100220	428765	428.765	366	535	42970935	794930000	428.765
51	125248	395035	395.035	329	543	49477415	915295000	395.035
52	203522	460351	460.351	355	896	93691374	1733220000	460.351
53	148655	379140	379.14	320	509	56360938	1042635000	379.14
54	94274	409322	409.322	354	567	38588487	713858000	409.322
55	86922	414076	414.076	343	631	35992489	665834000	414.076
56	50164	477197	477.197	370	750	23938216	442839000	477.197
57	56273	424118	424.118	354	507	23866213	441507000	424.118
58	85625	477944	477.944	344	1186	40924041	757064	477.944
59	85895	430288	430.288	351	518	36959718	683727	430.288
60	70057	451708	451.708	358	537	31645231	585413	451.708
61	72976	435666	435.666	339	549	31793129	588149	435.666
62	72381	447897	447.897	346	623	32419371	599734	447.897
63	66759	580386	580.386	422	975	38746277	716777000	580.386
64	46867	543409	543.409	444	759	25467845	471136000	543.409
65	40056	579363	579.363	444	778	23206781	429308000	579.363
66	67516	575888	575.888	411	823	38881796	719284000	575.888
67	49732	481124	481.124	367	620	23927134	442634000	481.124
68	41245	541658	541.658	425	1160	22340637	413285000	541.658
69	86922	435846	435.846	353	1063	37884782	700840000	435.846
70	43569	517079	517.079	410	663	22528807	416766000	517.079
71	38218	582938	582.938	451	1409	22278581	412137000	582.938
72	73300	489359	489.359	354	1160	35870160	663571000	489.359
73	51732	574213	574.213	445	1118	29705099	549522000	574.213
74	72435	544435	544.435	392	1092	39436359	729543000	544.435
75	87571	466308	466.308	373	900	40835118	755419000	466.308
76	74381	452295	452.295	354	631	33642340	622358000	452.295
77	63570	463706	463.706	361	783	29477846	545318000	463.706
78	60813	477870	477.87	351	759	29060856	537604000	477.87
79	41245	507516	507.516	428	665	20932472	387235000	507.516
80	66597	529261	529.261	376	1485	35247324	652049000	529.261
81	66489	468495	468.495	402	625	31149860	576249000	468.495
82	45083	506876	506.876	413	720	22851469	422735000	506.876
83	63786	561216	561.216	441	934	35797941	662235000	561.216
84	95734	583099	583.099	403	1219	55822214	1032669000	583.099
85	93409	581464	581.464	405	1197	54314098	1004770000	581.464
86	90436	501140	501.14	367	793	45321138	838407000	501.14
87	68219	676276	676.276	502	1626	46134847	853460000	676.276
88	86166	512539	512.539	374	845	44163254	816987000	512.539
89	111140	543705	543.705	376	907	60427212	1117858000	543.705
90	95788	543574	543.574	361	867	52067737	963214000	543.574
91	44434	528332	528.332	397	689	23476035	434289000	528.332
92	119843	754234	754.234	467	1438	90389402	1672136000	754.234
93	46542	521740	521.74	426	697	24283041	449218000	521.74
94	111896	438964	438.964	356	549	49118536	908656000	438.964
95	124275	616969	616.969	433	1343	76674034	1418412000	616.969
96	110491	564870	564.87	432	1161	62413022	1154594000	564.87
97	90220	756588	756.588	483	1494	68259259	1262745000	756.588
98	44272	568518	568.518	455	1524	25169455	465616000	568.518
99	36001	548947	548.947	424	704	19762911	365599000	548.947
100	198440	713261	713.261	421	1184	141539912	2618382000	713.261
101	179034	651795	651.795	383	1005	116693659	2158745000	651.795
102	68814	949990	949.99	460	2132	65372223	1209337000	949.99
103	101572	411729	411.729	350	508	41820023	773639000	411.729
104	45515	505665	505.665	421	645	23015530	425770000	505.665
105	97139	433206	433.206	343	1089	42081223	778471000	433.206
106	44975	546106	546.106	412	1216	24560998	454360000	546.106
107	181197	543688	543.688	364	2029	98514326	1822441000	543.688
108	95950	436636	436.636	356	873	41895161	775029000	436.636
109	176656	484061	484.061	347	1015	85512122	1581910000	484.061
110	77300	557335	557.335	380	1412	43082237	796989000	557.335
111	41623	517039	517.039	371	2163	21520874	398120000	517.039
112	70219	615899	615.899	406	2395	43247865	800053000	615.899
113	140817	581132	581.132	361	1846	81833054	1513850000	581.132
114	70706	617833	617.833	417	2382	43684207	808125000	617.833
115	80652	468309	468.309	339	723	37770021	698717000	468.309
116	201738	467890	467.89	352	657	94391240	1746167000	467.89
117	147574	506440	506.44	358	810	74737198	1382582000	506.44
118	94652	485070	485.07	340	693	45913054	849357000	485.07
119	25028	394855	394.855	331	549	9882456	182818	394.855
120	149790	437061	437.061	315	751	65467308	1211096	437.061
121	93571	448991	448.991	342	726	42012680	777203	448.991
122	182332	512870	512.87	341	1798	93512447	1729910	512.87
123	76814	494822	494.822	379	744	38009220	703142	494.822
124	98058	408252	408.252	338	765	40032437	740570	408.252
125	179413	453689	453.689	339	917	81397631	1505795	453.689
126	69841	495250	495.25	368	920	34588594	639863	495.25
127	101301	574407	574.407	391	1369	58188202	1076438	574.407
128	149682	579379	579.379	365	1398	86722496	1604301000	579.379
129	131627	456223	456.223	340	794	60051304	1110904000	456.223
130	74814	551283	551.283	381	1013	41243621	762976000	551.283
131	70219	531959	531.959	384	802	37353680	691015000	531.959
132	156763	553226	553.226	338	1023	86725469	1604356000	553.226
133	177737	458760	458.76	337	1407	81538664	1508404000	458.76
134	81355	463878	463.878	356	578	37738614	698136000	463.878
135	94436	443650	443.65	354	700	41896675	775057000	443.65
136	220063	507396	507.396	325	902	111659022	2065608000	507.396
137	150384	477071	477.071	344	851	71744050	1327211000	477.071
138	160817	524840	524.84	353	870	84403375	1561399000	524.84
139	161574	556117	556.117	335	1134	89854083	1662233000	556.117
140	94761	465989	465.989	354	882	44157361	816878000	465.989
141	104545	457723	457.723	363	697	47852593	885237000	457.723
142	79463	485437	485.437	366	709	38574108	713592000	485.437
143	134978	465888	465.888	336	788	62884879	1163323000	465.888
144	103518	421686	421.686	342	838	43651990	807529000	421.686
145	138871	410062	410.062	350	537	56945503	1053449000	410.062
146	98274	423896	423.896	345	1049	41658071	770643000	423.896
147	148763	453729	453.729	321	670	67497985	1248662000	453.729
148	95842	471879	471.879	361	1160	45225729	836642000	471.879
149	85949	402906	402.906	318	597	34629569	640621000	402.906
150	86274	421861	421.861	341	895	36395533	673290000	421.861
151	14811	373942	373.942	329	410	5538603	102460000	373.942
152	14974	401953	401.953	351	471	6018677	111341000	401.953
153	22109	436567	436.567	369	615	9652068	178556	436.567
154	105139	453030	453.03	326	620	47631286	881143	453.03
155	83139	402452	402.452	343	537	33459251	618971	402.452
156	281309	433627	433.627	351	564	121983009	2256594	433.627
157	138222	442536	442.536	366	726	61168161	1131565	442.536
158	116816	411942	411.942	359	544	48121252	890207	411.942
159	243848	425070	425.07	353	532	103652427	1917492	425.07
160	71733	450977	450.977	354	663	32349747	598446	450.977
161	114761	449044	449.044	370	802	51532958	953321	449.044
162	151628	427025	427.025	365	573	64748901	1197806	427.025
163	111356	440110	440.11	376	684	49008856	906627	440.11
164	101410	437985	437.985	372	556	44415858	821660	437.985
165	160925	428797	428.797	367	584	69004425	1276530	428.797
166	107680	430731	430.731	366	852	46381181	858017	430.731
167	64976	443907	443.907	362	522	28843118	533576	443.907
168	126005	453708	453.708	342	1027	57169512	1057593	453.708
169	130762	514057	514.057	347	1198	67219217	1243505	514.057
170	61840	538021	538.021	369	738	33271406	615496	538.021
171	164061	473211	473.211	370	1006	77635370	1436196	473.211
172	61408	505098	505.098	380	650	31016990	573791	505.098
173	123248	557668	557.668	354	910	68731657	1271484	557.668
174	122491	462161	462.161	355	755	56610732	1047256000	462.161
175	141033	459981	459.981	361	780	64872365	1200090000	459.981
176	148925	446742	446.742	362	868	66530973	1230773000	446.742
177	112869	538584	538.584	373	897	60789713	1124564000	538.584
178	117518	600661	600.661	375	1024	70588705	1305838000	600.661
179	314283	494147	494.147	376	841	155302039	2872971000	494.147
180	116978	487179	487.179	387	1021	56989072	1054255000	487.179
181	157087	610656	610.656	376	1121	95926437	1774567000	610.656
182	41840	600694	600.694	410	1255	25132751	464937000	600.694
183	13568	358598	358.598	315	404	4865495	90008000	358.598
184	118437	526006	526.006	346	918	62298693	1152479	526.006
185	58002	499481	499.481	404	809	28971069	535943	499.481
186	59138	482645	482.645	402	540	28542457	528014	482.645
187	64273	533271	533.271	412	671	34274852	634059	533.271
188	125140	565405	565.405	355	861	70754874	1308912000	565.405
189	69624	565333	565.333	410	940	39361004	728149000	565.333
190	56651	500384	500.384	404	622	28347206	524402000	500.384
191	53083	475224	475.224	393	580	25226430	466670000	475.224
192	154817	492756	492.756	385	639	76287045	1411253000	492.756
193	155250	497145	497.145	374	623	77181514	1427800000	497.145
194	142763	469802	469.802	366	590	67070184	1240748000	469.802
195	104653	421458	421.458	390	446	44106765	815942000	421.458
196	97463	460206	460.206	378	622	44853227	829751000	460.206
197	95950	415158	415.158	383	460	39834375	736906000	415.158
198	154277	463570	463.57	376	572	71517932	1323028000	463.57
199	67408	472844	472.844	398	659	31873565	589637000	472.844
200	132924	395328	395.328	363	419	52548729	972112000	395.328
201	71733	454613	454.613	391	633	32610622	603272000	454.613
202	21190	486964	486.964	351	930	10318798	190890	486.964
203	124221	414545	414.545	346	501	51495335	952625	414.545
204	96058	416632	416.632	341	676	40020815	740355	416.632
205	133195	413761	413.761	342	527	55110779	1019508	413.761
206	132708	494239	494.239	378	832	65589529	1213357	494.239
207	114329	417571	417.571	346	552	47740426	883162	417.571
208	121194	467627	467.627	359	699	56673600	1048419	467.627
209	111518	525318	525.318	377	776	58582488	1083732	525.318
210	128059	479812	479.812	378	656	61444334	1136674	479.812
211	62759	485111	485.111	375	1107	30445237	563214	485.111
212	71408	470625	470.625	372	1177	33606500	621695	470.625
213	74003	536870	536.87	411	1121	39729992	734975000	536.87
214	76381	468776	468.776	384	1250	35805833	662381000	468.776
215	75949	484386	484.386	403	977	36788630	680562000	484.386
216	76868	458995	458.995	382	1147	35282028	652691000	458.995
217	48164	498072	498.072	402	960	23989191	443782000	498.072
218	61624	521386	521.386	393	820	32129954	594380000	521.386
219	75084	467656	467.656	371	778	35113535	649574000	467.656
220	40596	434924	434.924	376	500	17656285	326628000	434.924
221	62705	448016	448.016	370	566	28092979	519699000	448.016
222	128924	411716	411.716	360	496	53080102	981942000	411.716
223	90274	396338	396.338	340	633	35778967	661884000	396.338
224	111086	511125	511.125	361	1316	56778577	1050361000	511.125
225	132600	475812	475.812	373	1122	63092725	1167168000	475.812
226	100869	423693	423.693	349	760	42737466	790611000	423.693
227	114167	445406	445.406	361	619	50850606	940698000	445.406
228	64922	462265	462.265	380	902	30010949	555180000	462.265
229	51353	413722	413.722	345	482	21246052	393036	413.722
230	45461	494037	494.037	360	669	22459561	415485	494.037
231	77030	450159	450.159	334	550	34675787	641476	450.159
232	89679	443923	443.923	358	549	39810752	736469	443.923
233	80652	488204	488.204	374	704	39374572	728400	488.204
234	92598	429516	429.516	359	623	39772481	735761	429.516
235	96544	398840	398.84	329	467	38505835	712329	398.84
236	92977	416835	416.835	343	485	38755953	716956	416.835
237	154817	423658	423.658	362	622	65589529	1213357	423.658
238	162439	444240	444.24	357	710	72161850	1334940	444.24
239	51624	419258	419.258	355	491	21643636	400391	419.258
240	250064	418404	418.404	348	563	104627926	1935538	418.404
241	148060	404236	404.236	343	647	59851188	1107202	404.236
242	100382	386827	386.827	312	595	38830604	718337	386.827
243	194278	424198	424.198	363	632	82412483	1524569	424.198
244	242442	404359	404.359	352	526	98033712	1813550	404.359
245	247415	426930	426.93	346	669	105628994	1954057	426.93
246	100382	628081	628.081	335	1169	63048291	1166346	628.081
247	27461	422900	422.9	370	478	11613066	214833	422.9
248	2757	372804	372.804	342	405	1027771	19013	372.804
249	100707	389212	389.212	322	457	39196295	725102	389.212
250	125519	414593	414.593	345	477	52039195	962686	414.593
251	96220	405979	405.979	341	475	39063371	722643	405.979
252	114437	411501	411.501	343	489	47090940	871147	411.501
253	113518	382130	382.13	336	432	43378735	802474	382.13
254	145844	482193	482.193	375	614	70324803	1300956	482.193
255	146384	550505	550.505	359	998	80585328	1490768	550.505
256	92761	462662	462.662	353	736	42916770	793928	462.662
257	97896	438157	438.157	354	608	42893797	793503	438.157
258	482830	547560	547.56	328	977	264378848	4890810	547.56
259	167142	574588	574.588	346	1347	96037685	1776625	574.588
260	126978	470545	470.545	338	671	59748914	1105310	470.545
261	156169	479927	479.927	332	808	74949531	1386510	479.927
262	180656	514154	514.154	341	940	92884962	1718302000	514.154
263	109950	397367	397.367	339	499	43690640	808244000	397.367
264	100274	462674	462.674	355	602	46394317	858260000	462.674
265	219685	492458	492.458	354	1011	108185368	2001348000	492.458
266	91085	412166	412.166	327	476	37542012	694499000	412.166
267	97031	405900	405.9	336	481	39384897	728591000	405.9
268	136924	487710	487.71	342	854	66779470	1235370000	487.71
269	187413	441661	441.661	326	756	82772930	1531237000	441.661
270	117248	402613	402.613	348	480	47205593	873268000	402.613
271	166115	529728	529.728	332	1358	87995737	1627855000	529.728
272	148168	422029	422.029	328	659	62531297	1156782000	422.029
273	70111	432203	432.203	334	496	30302150	560567000	432.203
274	75841	404475	404.475	308	865	30675733	567478	404.475
275	62327	410552	410.552	324	691	25588445	473367000	410.552
276	98977	395340	395.34	325	792	39129536	723867000	395.34
277	91842	421930	421.93	352	1092	38750709	716859000	421.93
278	71516	455332	455.332	365	1076	32563701	602404000	455.332
279	91517	503917	503.917	352	1871	46117117	853132000	503.917
280	78219	468331	468.331	358	1218	36632569	677675000	468.331
281	180278	442141	442.141	316	858	79708157	1474541000	442.141
282	74706	465510	465.51	371	815	34776278	643335000	465.51
283	98599	443252	443.252	344	1757	43703992	808491000	443.252
284	75571	498872	498.872	384	1098	37700072	697423000	498.872
285	137789	462841	462.841	320	864	63774591	1179782000	462.841
286	76490	461919	461.919	364	1113	35331976	653615000	461.919
287	119464	452238	452.238	335	763	54026303	999446000	452.238
288	79355	432741	432.741	364	1140	34339990	635264000	432.741
289	0.649	422333	422.333	406	444	273957	5068000	422.333
290	136979	472112	472.112	381	1015	64669276	1196333000	472.112
291	93301	538532	538.532	386	1363	50245663	929507000	538.532
292	71462	729038	729.038	417	1748	52098765	963788000	729.038
293	120329	460704	460.704	375	651	55436144	1025527000	460.704
294	73625	493496	493.496	372	1037	36333476	672142000	493.496
295	117897	472017	472.017	357	737	55649234	1029469000	472.017
296	109302	431237	431.237	342	609	47134996	871962000	431.237
297	138114	430631	430.631	363	641	59476092	1100263000	430.631
298	53678	501755	501.755	372	929	26933148	498243000	501.755
299	101626	439788	439.788	383	827	44693762	826801000	439.788
300	112545	562968	562.968	436	1530	63359277	1172099000	562.968
301	81571	514386	514.386	397	1069	41958894	776208000	514.386
302	197089	430495	430.495	357	705	84845825	1569584000	430.495
303	142006	469076	469.076	337	632	66611463	1232262000	469.076
304	54867	490169	490.169	366	1074	26894174	497522000	490.169
305	148330	554671	554.671	337	1695	82274477	1522016000	554.671
306	67570	454028	454.028	351	809	30678814	567535000	454.028
307	146168	496970	496.97	328	1023	72641113	1343806000	496.97
308	63516	410414	410.414	348	613	26067924	482237	410.414
309	91193	402843	402.843	343	567	36736411	679596	402.843
310	91247	433653	433.653	359	494	39569553	732007	433.653
311	34974	378896	378.896	322	433	13251673	245146	378.896
312	85085	425017	425.017	365	483	36162388	668977	425.017
313	95031	458024	458.024	366	687	43526471	805207	458.024
314	78814	472654	472.654	383	593	37251730	689129	472.654
315	94274	404942	404.942	332	482	38175497	706218	404.942
316	84003	447335	447.335	364	780	37577635	695158	447.335
317	142492	522203	522.203	360	986	74409834	1376526	522.203
318	96707	478870	478.87	379	681	46309881	856698	478.87
319	109194	428077	428.077	355	525	46743304	864716	428.077
320	120491	668965	668.965	347	1001	80604572	1491124	668.965
321	75841	425327	425.327	335	505	32257202	596734	425.327
322	86220	462199	462.199	376	793	39850700	737208	462.199
323	82976	444337	444.337	375	736	36869444	682057	444.337
324	80003	401961	401.961	331	509	32158171	594902	401.961
325	74544	451314	451.314	373	536	33642556	622362	451.314
326	67732	461041	461.041	357	596	31227431	577684	461.041
327	94220	464951	464.951	358	545	43807726	810410	464.951
328	59948	527374	527.374	361	1228	31615230	584858	527.374
329	73246	528690	528.69	357	1629	38724546	716375	528.69
330	8054	416664	416.664	365	468	3355974	62083	416.664
331	62759	425908	425.908	327	773	26729680	494479	425.908
332	28488	423231	423.231	358	486	12056868	223043	423.231
333	28434	416732	416.732	361	517	11849184	219201	416.732
334	1405	391885	391.885	356	435	550779	10189	391.885
335	0.162	387667	387.667	372	396	62867	1163	387.667
336	57894	491228	491.228	407	623	28439263	526105	491.228
337	124113	447734	447.734	330	1025	55569663	1027997	447.734
338	72165	461727	461.727	368	1158	33320543	616405	461.727
339	66543	417106	417.106	343	497	27755560	513457	417.106
340	114275	454569	454.569	331	917	51945786	960958	454.569
341	158601	478603	478.603	367	696	75906975	1404222	478.603
342	127465	481528	481.528	363	705	61377791	1135443	481.528
343	125681	502680	502.68	365	904	63177215	1168731	502.68
344	108437	453667	453.667	371	772	49194215	910056	453.667
345	166169	483510	483.51	373	662	80344399	1486311	483.51
346	61624	578594	578.594	405	818	35655340	659597	578.594
347	72381	432466	432.466	353	573	31302461	579072	432.466
348	92815	464672	464.672	352	669	43128293	797841	464.672
349	76436	504880	504.88	400	717	38590757	713900	504.88
350	139465	536358	536.358	353	1126	74803255	1383804000	536.358
351	109680	524137	524.137	353	2274	57487416	1063474000	524.137
352	72381	457237	457.237	356	783	33095453	612241000	457.237
353	95734	531108	531.108	404	722	50844930	940593000	531.108
354	66327	525932	525.932	435	590	34883471	645318000	525.932
355	88328	468985	468.985	322	817	41424494	766322000	468.985
356	93788	522948	522.948	322	811	49046046	907315000	522.948
357	116707	425951	425.951	360	504	49711695	919629000	425.951
358	83247	433577	433.577	354	709	36093791	667708000	433.577
359	46705	570431	570.431	449	689	26641731	492852000	570.431
1	65.73	472.04	0.47204	338	665	31028.2	573999	472.04
2	82.71	428.23	0.42823	338	604	35416.8	655185	428.23
3	122.6	450.97	0.45097	309	601	55289.2	1022809	450.97
4	126.11	464.91	0.46491	337	770	58631.7	1084642	464.91
5	118.76	411.35	0.41135	333	479	48853.1	903745	411.35
6	82.38	419.41	0.41941	308	505	34551.8	639183	419.41
7	169.25	493.67	0.49367	346	786	83554.3	1545692	493.67
8	126.98	436.02	0.43602	339	554	55365	1024211	436.02
9	256.98	443.15	0.44315	346	1260	113883	2106755	443.15
10	123.79	445.26	0.44526	354	711	55118.2	1019645	445.26
11	148.82	441.36	0.44136	316	895	65681.3	1215054	441.36
12	125.14	472.68	0.47268	375	813	59151.1	1094251	472.68
13	95.19	448.56	0.44856	333	657	42699.4	789907	448.56
14	106.49	462.07	0.46207	340	602	49206.2	910277	462.07
15	99.09	446.85	0.44685	343	676	44276	819072	446.85
16	96.06	497.82	0.49782	355	1095	47819.2	884620	497.82
17	85.14	458.94	0.45894	339	683	39073.9	722838	458.94
18	86.65	532.27	0.53227	343	1441	46122.7	853235	532.27
19	146.06	410.53	0.41053	363	546	59962.7	1109264	410.53
20	229.04	476.37	0.47637	331	761	109106	2018377	476.37
21	133.52	421.41	0.42141	361	523	56266.1	1040881	421.41
22	102.81	442.16	0.44216	330	777	45461	840994	442.16
23	140.92	417	0.417	343	663	58765.8	1087123	417
24	108.6	445.32	0.44532	314	775	48360.8	894639	445.32
25	125.57	470.72	0.47072	356	1181	59109.3	1093478	470.72
26	124.98	432.65	0.43265	337	697	54071.2	1000277	432.65
27	106.49	438.91	0.43891	345	549	46739.7	864650	438.91
28	91.25	462.88	0.46288	343	749	42236.2	781337	462.88
29	118.82	445.51	0.44551	345	793	52933.2	979224	445.51
30	258.82	447.63	0.44763	328	896	115856	2143254	447.63
31	81.08	477.51	0.47751	336	557	38718.8	716268	477.51
32	98.87	437.47	0.43747	348	798	43252	800129	437.47
33	74.33	835.45	0.83545	463	1668	62096.6	1148740	835.45
34	73.84	444.33	0.44433	331	553	32810	606961	444.33
35	133.25	401.61	0.40161	350	585	53513.4	989958	401.61
36	86.11	430.1	0.4301	352	510	37036.4	685145	430.1
37	5.41	384.81	0.38481	357	415	2080.14	38481	384.81
38	62.49	415.76	0.41576	337	738	25980.5	480619	415.76
1	231.2	435.62	0.43562	356	654	100715	1863149	435.62
2	166.66	447.21	0.44721	373	689	74530.6	1378761	447.21
3	174.82	448.06	0.44806	367	801	78328.4	1449017	448.06
4	140.22	473.95	0.47395	342	867	66458.6	1229434	473.95
5	76.06	460.02	0.46002	392	530	34988.1	647253	460.02
6	127.3	441.59	0.44159	368	649	56215.5	1039945	441.59
7	115.68	446.8	0.4468	361	613	51685.9	956151	446.8
8	181.03	610.94		366	926	110602	2046048	610.94
9	131.63	631.07		390	1015	83065.9	1536657	631.07
10	108.6	446.57		363	672	48497.3	897164	446.57
11	127.46	442.93		355	640	56458.1	1044433	442.93
12	85.63	466.63		362	663	39955.5	739147	466.63
13	123.14	467.06		384	721	57513.8	1063963	467.06
14	171.41	493.27		370	1013	84552	1564149	493.27
15	149.57	412.94		327	967	61764.9	1142604	412.94
16	89.41	478.58		356	897	42789.4	791572	478.58
17	84.33	441.59		367	555	37238.7	688887	441.59
18	130.44	428.92		334	556	55947.7	1034991	428.92
19	130.33	500.82		354	700	65271.2	1207468	500.82
20	116.33	461.87		372	657	53729.3	993952	461.87
1	104.22	457.49		379	1002	47680.2	882047	457.49
2	113.79	430.44		354	635	48979.2	906079	430.44
3	94.33	477.36		381	955	45028.2	832987	477.36
4	112.82	424.87		361	612	47932	886706	424.87
5	181.52	420.63		330	599	76352.4	1412462	420.63
6	131.46	429.02		359	547	56401.6	1043387	429.02
7	127.95	432.2		361	557	55300	1023009	432.2
8	106.76	435.94		360	533	46541.8	860988	435.94
9	102.65	421.83		363	492	43302.4	801062	421.83
1	66.92	415.1		347	497	27779.2	513894	415.1
2	181.95	469.76		330	627	85475.3	1581228	469.76
3	77.57	462.02		380	622	35838.9	662992	462.02
4	203.9	492.82		358	703	100487	1858925	492.82
5	67.62	643.33		446	838	43504.6	804803	643.33
6	466.4	439.17		347	615	204830	3789201	439.17
7	83.14	590.68		437	836	49107.9	908459	590.68
8	66.92	497.69		377	876	33306.3	616142	497.69
9	79.79	550.21		391	684	43899.3	812104	550.21
10	83.19	464.69		368	642	38658.4	715151	464.69
11	71.19	599.47		417	1210	42677.3	789498	599.47
12	82.54	497.46		399	733	41062.4	759623	497.46
13	98.49	554.46		385	841	54609.1	1010227	554.46
14	64.76	507.13		383	687	32841.6	607544	507.13
15	113.95	483.97		364	714	55148.8	1020212	483.97
16	70.87	466.37		393	852	33050.3	611405	466.37
17	66.22	466.27		388	569	30875.8	571179	466.27
18	77.41	503.91		383	1023	39007.3	721606	503.91
19	71.25	474.92		383	569	33836.5	625950	474.92
20	87.14	461.97		376	862	40255.4	744695	461.97
21	120.92	496.75		355	894	60068.6	1111223	496.75
22	83.63	473.75		371	842	39617	732884	473.75
23	75.46	583.71		404	1442	44047.9	814854	583.71
24	68.27	472.11		379	853	32232.5	596277	472.11
25	115.36	468.4		357	639	54033.1	999572	468.4

## Sheet: BRCA2- Olaparib 
	Area	Mean		Min	Max	IntDen	RawintDean
1	145249	787389	787.389	365	1843	114367619	2115715	787.389
2	212495	467634	467.634	348	965	99369983	1838270	467.634
3	79246	1970331	1970.33	624	3266	156141748	2888505	1970.33
4	85517	535435	535.435	380	1032	45788779	847058	535.435
5	193900	530340	530.34	365	1097	102832772	1902329000	530.34
6	187737	596950	596.95	359	1701	112069742	2073206000	596.95
7	116167	447026	447.026	365	753	51929569	960658000	447.026
8	168926	444876	444.876	329	665	75151107	1390239000	444.876
9	70760	604641	604.641	398	1176	42784170	791475000	604.641
10	182602	572690	572.69	376	1276	104574356	1934547000	572.69
11	135897	444577	444.577	369	721	60416833	1117666000	444.577
12	170547	491383	491.383	346	1727	83804161	1550314000	491.383
13	202333	499787	499.787	392	1094	101123135	1870702000	499.787
14	139844	537237	537.237	378	880	75129052	1389831000	537.237
15	235901	962091	962.091	467	1512	226958733	4198566000	962.091
16	154060	951393	951.393	371	1797	146571846	2711469000	951.393
17	119735	641146	641.146	399	1317	76767335	1420138000	641.146
18	83139	562603	562.603	367	984	46773954	865283000	562.603
19	114275	552612	552.612	421	1117	63149646	1168221000	552.612
20	167466	648099	648.099	370	1771	108534679	2007810000	648.099
21	27352	455595	455.595	384	539	12461641	230531000	455.595
22	176602	506671	506.671	359	1041	89478986	1655294000	506.671
23	129627	613727	613.727	390	1155	79555556	1471718000	613.727
24	90760	483721	483.721	369	935	43902756	812168000	483.721
25	91193	498468	498.468	388	891	45456766	840916000	498.468
26	188386	494547	494.547	357	885	93165839	1723498000	494.547
27	108058	420303	420.303	354	612	45417304	840186000	420.303
28	118383	1093874	1093.87	473	2219	129496234	2395583000	1093.87
29	106653	458207	458.207	349	942	48869174	904043000	458.207
30	184494	470159	470.159	351	667	86741578	1604654000	470.159
31	134546	433230	433.23	376	640	58289395	1078310000	433.23
32	147898	492584	492.584	354	902	72852149	1347710000	492.584
33	141627	468415	468.415	372	832	66340371	1227247000	468.415
34	246713	476829	476.829	363	1877	117639752	2176247000	476.829
35	129357	448949	448.949	357	664	58074467	1074334000	448.949
36	99842	421855	421.855	362	570	42118792	779166000	421.855
37	106058	456729	456.729	372	548	48439968	896103000	456.729
38	411746	494033	494.033	332	925	203416209	3763047000	494.033
39	89463	449402	449.402	357	523	40204931	743761000	449.402
40	111464	475879	475.879	382	888	53043344	981262000	475.879
41	174494	503317	503.317	362	951	87825622	1624708000	503.317
42	114383	428477	428.477	360	777	49010477	906657000	428.477
43	107950	478702	478.702	375	824	51676045	955968000	478.702
44	155628	488802	488.802	350	1152	76071306	1407262000	488.802
45	119086	573645	573.645	369	1059	68313045	1263740000	573.645
46	116816	585391	585.391	363	1296	68382778	1265030000	585.391
47	174926	517026	517.026	346	940	90441296	1673096000	517.026
48	115464	436299	436.299	372	765	50376911	931935000	436.299
49	136276	480205	480.205	323	1085	65440334	1210597000	480.205
50	127086	472342	472.342	331	712	60028114	1110475000	472.342
51	110221	431577	431.577	364	795	47568743	879986000	431.577
52	261848	524093	524.093	359	960	137233034	2538708000	524.093
53	155466	485978	485.978	368	914	75552907	1397672000	485.978
54	173845	545112	545.112	360	1259	94764931	1753080000	545.112
55	168007	538387	538.387	348	1055	90452702	1673307000	538.387
56	120870	440323	440.323	356	728	53221730	984562000	440.323
57	92328	520891	520.891	416	762	48092819	889681	520.891
58	20433	431418	431.418	349	590	8815277	163076	431.418
59	120113	504320	504.32	401	674	60575380	1120599	504.32
60	174061	578780	578.78	341	1347	100743011	1863670	578.78
61	145682	536917	536.917	371	893	78218853	1446990	536.917
62	183143	554507	554.507	353	1140	101553801	1878669000	554.507
63	209198	557607	557.607	336	1057	116650144	2157940000	557.607
64	184062	521685	521.685	366	1084	96022225	1776339000	521.685
65	183953	588231	588.231	332	1202	108207152	2001751000	588.231
66	10379	436589	436.589	381	575	4531265	83825000	436.589
67	130222	408042	408.042	344	560	53135834	982973000	408.042
68	111194	454865	454.865	339	663	50578109	935657000	454.865
69	111194	419578	419.578	340	507	46654436	863072000	419.578
70	130222	414741	414.741	347	506	54008140	999110000	414.741
71	91950	450615	450.615	355	692	41433899	766496000	450.615
72	115788	445528	445.528	366	762	51587015	954321000	445.528
73	107950	447529	447.529	351	598	48310881	893715000	447.529
74	220549	437345	437.345	334	643	96456189	1784367000	437.345
75	218603	475459	475.459	363	780	103936979	1922756000	475.459
76	191954	457970	457.97	344	725	87909085	1626252000	457.97
77	139735	455356	455.356	371	901	63629342	1177095000	455.356
78	170980	480018	480.018	347	848	82073388	1518296000	480.018
79	182818	441168	441.168	354	590	80653493	1492029000	441.168
80	202981	539494	539.494	362	1080	109507151	2025800000	539.494
81	229739	471921	471.921	353	866	108418783	2005666000	471.921
82	136222	447138	447.138	347	977	60909988	1126789000	447.138
83	127248	541302	541.302	360	1141	68879771	1274224	541.302
84	139952	481457	481.457	384	786	67380683	1246492	481.457
85	129194	508571	508.571	388	780	65704561	1215485	508.571
86	220009	581610	581.61	410	1158	127959468	2367154	581.61
87	180548	540896	540.896	383	887	97657697	1806594	540.896
88	211630	558984	558.984	387	1348	118297887	2188422	558.984
89	183305	533294	533.294	378	1234	97755322	1808400000	533.294
90	92274	456596	456.596	376	543	42131928	779409000	456.596
91	141195	543672	543.672	366	1348	76763767	1420072000	543.672
92	85895	475485	475.485	356	835	40841983	755546000	475.485
93	132276	440128	440.128	357	618	58218149	1076992000	440.128
94	133789	492328	492.328	348	724	65868135	1218511000	492.328
95	143303	519201	519.201	328	1031	74403077	1376401000	519.201
96	173034	535377	535.377	330	1162	92638412	1713741000	535.377
97	200765	474058	474.058	357	1324	95174191	1760651000	474.058
98	135303	607032	607.032	336	1263	82133066	1519400	607.032
99	76057	490368	490.368	362	980	37296002	689948	490.368
100	34001	489153	489.153	356	1092	16631865	307677	489.153
101	171034	531211	531.211	354	1334	90855204	1680753000	531.211
102	96977	462649	462.649	357	1112	44866309	829993000	462.649
103	93301	443611	443.611	345	639	41389411	765673000	443.611
104	173521	445035	445.035	343	759	77222759	1428563000	445.035
105	95517	440662	440.662	342	1151	42090845	778649000	440.662
106	194440	528064	528.064	351	1224	102677036	1899448000	528.064
107	367312	530761	530.761	347	1710	194955109	3606523000	530.761
108	99734	457483	457.483	364	1132	45626556	844057000	457.483
109	80382	546773	546.773	374	1356	43950542	813052000	546.773
110	124978	464722	464.722	356	763	58080035	1074437000	464.722
111	135681	497168	497.168	393	1017	67456362	1247892000	497.168
112	304769	599141	599.141	344	1821	182599742	3377958000	599.141
113	159304	580735	580.735	378	1285	92513218	1711425000	580.735
114	100491	566678	566.678	358	2122	56945827	1053455000	566.678
115	106383	619230	619.23	412	1228	65875379	1218645000	619.23
116	106383	536366	536.366	371	987	57060102	1055569000	536.366
117	130978	603537	603.537	380	1166	79050238	1462370000	603.537
118	122221	566789	566.789	369	1229	69273679	1281511000	566.789
119	165845	628457	628.457	344	1358	104226126	1928105000	628.457
120	152060	541953	541.953	368	1248	82409456	1524513000	541.953
121	169088	490137	490.137	335	858	82876232	1533148000	490.137
122	123356	530372	530.372	377	944	65424820	1210310000	530.372
123	170061	461484	461.484	363	770	78480431	1451829000	461.484
124	173899	537645	537.645	342	1233	93495906	1729604000	537.645
125	231793	596417	596.417	351	1835	138245400	2557436000	596.417
126	151357	769884	769.884	356	2292	116527653	2155674000	769.884
127	213090	761280	761.28	355	2358	162221022	3000967000	761.28
128	71516	460806	460.806	342	863	32955177	609646000	460.806
129	94058	732006	732.006	407	1662	68850959	1273691	732.006
130	92544	775284	775.284	427	2795	71748158	1327287	775.284
131	25839	723791	723.791	498	1809	18701949	345972	723.791
132	110599	682282	682.282	393	2433	75459714	1395948	682.282
133	45353	848082	848.082	487	2167	38463238	711541	848.082
134	97463	499979	499.979	373	1205	48729709	901463	499.979
135	236658	493467	493.467	375	904	116783068	2160399	493.467
136	163520	514752	514.752	339	1206	84172392	1557126	514.752
137	432774	570985	570.985	372	1270	247107660	4571306	570.985
138	189413	593585	593.585	385	1041	112432838	2079923	593.585
139	77138	460715	460.715	386	692	35538741	657440	460.715
140	102112	442541	442.541	375	711	45188863	835960	442.541
141	108923	453495	453.495	366	701	49396169	913792	453.495
142	98112	441440	441.44	342	882	43310624	801214	441.44
143	112869	419433	419.433	354	591	47341166	875776	419.433
144	118978	459781	459.781	382	694	54703682	1011977	459.781
145	137141	429743	429.743	365	676	58935313	1090259	429.743
146	149303	442768	442.768	365	763	66106685	1222924	442.768
147	96977	440946	440.946	359	643	42761629	791058	440.946
148	177737	446089	446.089	366	664	79286572	1466742	446.089
149	103085	389110	389.11	331	469	40111521	742033	389.11
150	201305	549722	549.722	374	971	110661955	2047163	549.722
151	126978	454593	454.593	384	694	57723372	1067839	454.593
152	106923	437593	437.593	360	826	46788874	865559	437.593
153	78490	548369	548.369	374	999	43041316	796232	548.369
154	79517	428402	428.402	340	506	34065168	630180	428.402
155	67787	435344	435.344	350	507	29510442	545921	435.344
156	140762	1666307	1666.31	500	2852	234553474	4339063	1666.31
157	179899	1976357	1976.36	502	3493	355544984	6577315	1976.36
158	85571	591708	591.708	440	1393	50633084	936674	591.708
159	129086	469713	469.713	367	794	60633544	1121675	469.713
160	112545	419315	419.315	352	574	47191863	873014	419.315
161	92761	460943	460.943	355	641	42757305	790978	460.943
162	203576	468059	468.059	375	780	95285546	1762711	468.059
163	201954	598085	598.085	388	1229	120785826	2234447	598.085
164	165682	554580	554.58	387	1126	91884111	1699787000	554.58
165	87950	501449	501.449	363	810	44102170	815857000	501.449
166	71084	662495	662.495	385	1234	47092778	871181000	662.495
167	190332	513130	513.13	375	1006	97665157	1806732000	513.13
168	145249	489043	489.043	370	878	71033048	1314058000	489.043
169	165304	463381	463.381	356	603	76598787	1417020000	463.381
170	22650	500303	500.303	385	830	11331650	209627000	500.303
171	151087	441640	441.64	345	585	66726170	1234384	441.64
172	167304	568234	568.234	382	1268	95067862	1758684	568.234
173	141465	648983	648.983	401	1110	91808486	1698388	648.983
174	104491	437228	437.228	375	570	45686288	845162	437.228
175	93571	481287	481.287	382	962	45034694	833108	481.287
176	95409	494458	494.458	386	1363	47175916	872719	494.458
177	195413	461890	461.89	346	692	90259504	1669733	461.89
178	89679	462414	462.414	365	836	41468928	767144	462.414
179	100599	464785	464.785	372	1290	46756710	864964	464.785
180	95734	424843	424.843	361	700	40671760	752397	424.843
181	114113	434510	434.51	363	730	49583095	917250	434.51
182	91139	468047	468.047	380	838	42657300	789128	468.047
183	96382	471247	471.247	379	1025	45419845	840233	471.247
184	94382	468964	468.964	367	1154	44261906	818812	468.964
185	156385	480875	480.875	362	838	75201487	1391171	480.875
186	112383	488554	488.554	385	730	54905149	1015704	488.554
187	131140	454880	454.88	358	702	59653234	1103540	454.88
188	144492	470852	470.852	344	896	68034494	1258587	470.852
189	187467	468188	468.188	355	677	87769890	1623677	468.188
190	184602	454634	454.634	354	666	83926436	1552576	454.634
191	96436	595994	595.994	358	1260	57475524	1063254	595.994
192	55029	584840	584.84	382	1148	32183307	595367	584.84
193	94544	491286	491.286	371	739	46448373	859260	491.286
194	128978	466428	466.428	345	768	60159038	1112897	466.428
195	82165	479250	479.25	378	725	39377816	728460	479.25
196	105518	467463	467.463	381	922	49325625	912487	467.463
197	94977	474361	474.361	374	774	45053290	833452	474.361
198	120599	490641	490.641	360	839	59171106	1094621	490.641
199	60921	736927	736.927	369	1456	44894635	830517	736.927
200	101572	488704	488.704	347	1544	49638503	918275	488.704
201	228550	415538	415.538	334	646	94971047	1756893	415.538
202	66435	438904	438.904	355	733	29158644	539413	438.904
203	147898	501308	501.308	362	989	74142417	1371579	501.308
204	82057	557075	557.075	416	953	45712127	845640	557.075
205	23082	560564	560.564	383	967	12938958	239361000	560.564
206	110167	422086	422.086	364	508	46499835	860212000	422.086
207	156114	787520	787.52	368	3281	122943319	2274359000	787.52
208	127302	433766	433.766	362	619	55219540	1021520000	433.766
209	508183	2679894	2679.89	455	4095	1361876243	25193687000	2679.89
210	183305	885122	885.122	382	2358	162247078	3001449000	885.122
211	169034	584794	584.794	363	1163	98850070	1828652000	584.794
212	123627	532886	532.886	358	895	65878892	1218710000	532.886
213	350879	564476	564.476	355	1243	198062965	3664016000	564.476
214	167899	444413	444.413	348	666	74616437	1380348000	444.413
215	150330	436086	436.086	366	613	65556987	1212755000	436.086
216	37677	455283	455.283	363	740	17153778	317332000	455.283
217	367204	512757	512.757	363	926	188286460	3483158000	512.757
218	121464	443112	443.112	313	1205	53822295	995672000	443.112
219	82544	492240	492.24	348	1301	40631434	751651000	492.24
220	94707	452502	452.502	357	993	42854876	792783000	452.502
221	160061	459403	459.403	332	764	73532284	1360292000	459.403
222	94112	525059	525.059	360	1093	49414278	914127000	525.059
223	133032	781834	781.834	339	2517	104009306	1924094000	781.834
224	107572	478872	478.872	359	696	51513228	952956000	478.872
225	37839	610857	610.857	376	1467	23114452	427600000	610.857
226	118275	485343	485.343	324	866	57403954	1061930000	485.343
227	92815	602194	602.194	359	1247	55892379	1033967000	602.194
228	21839	435428	435.428	370	659	9509197	175913	435.428
229	94166	419056	419.056	339	880	39460846	729996	419.056
230	115518	502588	502.588	376	1003	58058034	1074030	502.588
231	117032	403017	403.017	348	587	47165754	872531	403.017
232	97139	430703	430.703	315	957	41838132	773974	430.703
233	108869	454574	454.574	366	712	49489200	915513	454.574
234	109734	445529	445.529	340	979	48889716	904423	445.529
235	137357	389955	389.955	338	480	53562987	990875000	389.955
236	218766	529632	529.632	344	1214	115865301	2143421000	529.632
237	95031	485107	485.107	358	852	46100143	852818000	485.107
238	100166	426997	426.997	335	831	42770710	791226000	426.997
239	90544	436216	436.216	361	532	39496794	730661000	436.216
240	22325	1292068	1292.07	728	1950	28845712	533624000	1292.07
241	130222	480003	480.003	345	866	62506701	1156327000	480.003
242	176169	524696	524.696	317	1174	92435323	1709984000	524.696
243	99842	444260	444.26	367	581	44355748	820548000	444.26
244	151357	470856	470.856	351	734	71267544	1318396000	470.856
245	398178	649789	649.789	351	2004	258731862	4786345000	649.789
246	106491	456682	456.682	357	721	48632408	899663000	456.682
247	149898	518308	518.308	358	1052	77693372	1437269000	518.308
248	142384	532326	532.326	355	1226	75794863	1402148000	532.326
249	192008	1422694	1422.69	391	4095	273168340	5053409000	1422.69
250	132816	411093	411.093	339	790	54599786	1010055000	411.093
251	46975	391789	391.789	306	946	18404261	340465000	391.789
252	60327	503108	503.108	366	719	30350909	561469	503.108
253	165250	608617	608.617	397	928	100573923	1860542	608.617
254	88166	375784	375.784	325	426	33131292	612904	375.784
255	87355	435016	435.016	369	637	38000787	702986	435.016
256	65624	386628	386.628	332	452	25372166	469366	386.628
257	106383	637385	637.385	396	1174	67806755	1254374	637.385
258	158169	627566	627.566	392	1594	99261276	1836259	627.566
259	100923	456983	456.983	353	559	46120144	853188	456.983
260	47191	449315	449.315	345	550	21203672	392252	449.315
261	100437	501816	501.816	357	681	50400696	932375	501.816
262	122005	476271	476.271	355	781	58107388	1074943	476.271
263	170764	613898	613.898	383	1309	104831556	1939305000	613.898
264	191792	488186	488.186	374	925	93629966	1732084000	488.186
265	117789	488225	488.225	369	916	57507363	1063843000	488.225
266	53408	439145	439.145	366	576	23453655	433875000	439.145
267	79463	418269	418.269	335	685	33236810	614856000	418.269
268	87625	481350	481.35	374	767	42178362	780268000	481.35
269	167682	461786	461.786	367	804	77433470	1432461000	461.786
270	118113	570966	570.966	383	1019	67438469	1247561000	570.966
271	66543	420365	420.365	343	851	27972434	517469000	420.365
272	85787	469196	469.196	363	1392	40251041	744614000	469.196
273	129573	592301	592.301	381	1085	76746091	1419745000	592.301
274	96436	833566	833.566	388	1809	80386076	1487082000	833.566
275	100166	606027	606.027	369	973	60703439	1122968	606.027
276	75030	492230	492.23	379	661	36932041	683215	492.23
277	70003	474046	474.046	398	674	33184537	613889	474.046
278	92220	540058	540.058	398	711	49804131	921339	540.058
279	27515	686196	686.196	429	1199	18880443	349274	686.196
280	107572	513671	513.671	377	745	55256569	1022205	513.671
281	119518	573507	573.507	384	811	68544676	1268025	573.507
282	136006	599284	599.284	380	922	81505960	1507799	599.284
283	100545	488008	488.008	405	742	49066534	907694	488.008
284	100653	503972	503.972	383	749	50726169	938396	503.972
285	96653	504244	504.244	414	779	48736466	901588	504.244
286	169737	440925	440.925	379	578	74841202	1384506	440.925
287	153682	441238	441.238	386	567	67810322	1254440	441.238
288	149087	496159	496.159	405	670	73970951	1368407	496.159
289	253037	532372	532.372	371	823	134709905	2492032	532.372
290	115951	676570	676.57	391	1096	78448754	1451243	676.57
291	152331	627940	627.94	391	1031	95654426	1769535	627.94
292	123248	566950	566.95	412	821	69875649	1292647	566.95
293	88382	611536	611.536	420	1118	54048736	999861000	611.536
294	278606	644656	644.656	413	1179	179605080	3322559000	644.656
295	88544	502578	502.578	401	795	44500294	823222000	502.578
296	67624	459280	459.28	372	613	31058505	574559000	459.28
297	160601	569402	569.402	391	1085	91446634	1691694000	569.402
298	77030	434465	434.465	373	616	33466927	619113000	434.465
299	167412	406400	406.4	363	433	68036385	1258622000	406.4
300	68057	391720	391.72	354	582	26659245	493176000	391.72
301	20055	507725	507.725	387	798	10182360	188366000	507.725
302	82652	472862	472.862	358	794	39082993	723006	472.862
303	88598	434383	434.383	352	647	38485563	711954	434.383
304	89517	463851	463.851	365	1006	41522660	768138	463.851
305	155898	573339	573.339	339	1228	89382550	1653510	573.339
306	165250	613671	613.671	367	1343	101409093	1875992000	613.671
307	81949	586968	586.968	388	1163	48101576	889843000	586.968
308	100545	541863	541.863	405	1019	54481402	1007865000	541.863
309	98599	845285	845.285	427	1580	83343872	1541799000	845.285
310	79733	624699	624.699	405	1395	49809104	921431000	624.699
311	107626	417876	417.876	346	544	44974368	831992000	417.876
312	94923	416488	416.488	358	730	39534201	731353000	416.488
313	76219	529796	529.796	350	1006	40380721	747013000	529.796
314	75192	506228	506.228	365	1110	38064411	704163000	506.228
315	78273	693915	693.915	397	1647	54315125	1004789000	693.915
316	72273	3212162	3212.16	946	4095	232153269	4294661000	3212.16
317	64759	3198689	3198.69	889	4095	207145172	3832030000	3198.69
318	95085	533694	533.694	375	1261	50746224	938767000	533.694
319	98923	518208	518.208	379	1291	51262623	948320000	518.208
320	155033	597763	597.763	362	1838	92673224	1714385000	597.763
321	48867	568457	568.457	358	1121	27778696	513885000	568.457
322	12163	483582	483.582	379	727	5881644	108806000	483.582
323	166872	522318	522.318	363	1352	87160135	1612397000	522.318
324	76706	430351	430.351	355	721	33010422	610668000	430.351
325	113680	410288	410.288	327	736	46641679	862836000	410.288
326	155952	552340	552.34	400	1138	86138634	1593500000	552.34
327	63516	495199	495.199	391	841	31453116	581859000	495.199
328	151466	424439	424.439	326	795	64287963	1189279000	424.439
329	55678	503185	503.185	393	848	28016327	518281000	503.185
330	169142	432364	432.364	357	1015	73130863	1352866000	432.364
331	120762	2676663	2676.66	842	4095	323238320	5979666000	2676.66
332	136276	514941	514.941	372	1099	70174040	1298167000	514.941
333	133465	486427	486.427	366	1126	64920908	1200988000	486.427
334	147628	776279	776.279	429	1725	114600277	2120019000	776.279
335	144979	762614	762.614	403	1641	110562978	2045332000	762.614
336	63624	589492	589.492	441	912	37505956	693832000	589.492
337	63949	514719	514.719	377	734	32915553	608913000	514.719
338	52272	501244	501.244	374	1380	26201227	484703000	501.244
339	129140	582892	582.892	357	1907	75274896	1392529000	582.892
340	127140	596062	596.062	391	1341	75783457	1401937000	596.062
341	71462	621455	621.455	442	1915	44410669	821564000	621.455
342	59462	613325	613.325	413	1241	36469482	674658000	613.325
343	16379	555700	555.7	393	1028	9101829	168377000	555.7
344	105626	761020	761.02	432	1563	80383428	1487033000	761.02
345	85355	893946	893.946	469	1696	76302559	1411540000	893.946
346	28812	455717	455.717	347	844	13130101	242897000	455.717
347	239902	591397	591.397	348	1353	141877169	2624621000	591.397
348	67192	511427	511.427	365	790	34363774	635704000	511.427
349	64976	436071	436.071	327	1113	28333962	524157	436.071
350	41191	464395	464.395	345	766	19128831	353869	464.395
351	12811	791810	791.81	558	1258	10144142	187659	791.81
352	100004	478281	478.281	352	798	47829997	884819	478.281
353	81679	433403	433.403	335	510	35399925	654872	433.403
354	87031	503747	503.747	311	1150	43841403	811033	503.747
355	74652	470166	470.166	365	709	35098669	649299	470.166
356	125248	811770	811.77	500	1654	101672887	1880872	811.77
357	132762	476288	476.288	366	739	63233055	1169764	476.288
358	113842	478800	478.8	376	1195	54507782	1008353000	478.8
359	68165	431981	431.981	366	526	29445953	544728000	431.981
360	83895	460119	460.119	380	922	38601784	714104000	460.119
361	90382	467300	467.3	351	1090	42235500	781325000	467.3
362	75733	576740	576.74	337	1750	43678153	808013000	576.74
363	53948	386135	386.135	328	472	20831279	385363000	386.135
364	108437	477723	477.723	375	1338	51802807	958313000	477.723
365	130924	410986	410.986	347	500	53808024	995408000	410.986
366	141844	474522	474.522	378	910	67307869	1245145000	474.522
367	98977	470307	470.307	374	604	46549621	861133000	470.307
368	84544	440746	440.746	343	810	37262433	689327000	440.746
369	78111	485223	485.223	342	842	37901378	701147000	485.223
370	125897	622163	622.163	389	971	78328425	1449017000	622.163
371	70814	532350	532.35	369	928	37697694	697379000	532.35
372	130600	473360	473.36	355	672	61820728	1143637000	473.36
373	91788	584491	584.491	424	907	53648990	992466000	584.491
374	86760	490416	490.416	412	630	42548593	787117000	490.416
375	91085	660966	660.966	390	1114	60203959	1113728000	660.966
376	52381	509464	509.464	441	631	26686003	493671000	509.464
377	101031	512064	512.064	351	1210	51734426	957048000	512.064
378	74976	635397	635.397	386	1602	47639503	881295000	635.397
379	85463	505384	505.384	385	737	43191592	799012000	505.384
380	75625	668620	668.62	389	1728	50564162	935399000	668.62
381	79949	505725	505.725	358	853	40432345	747968000	505.725
382	47461	581719	581.719	398	988	27609176	510749000	581.719
383	79301	453029	453.029	352	604	35925405	664593000	453.029
384	67300	595705	595.705	363	1498	40090980	741653000	595.705
385	71570	460977	460.977	354	575	32992313	610333000	460.977
386	72543	772417	772.417	454	1428	56033790	1036583000	772.417
387	82814	557725	557.725	412	870	46187498	854434000	557.725
388	78490	590658	590.658	441	918	46360586	857636000	590.658
389	81247	618935	618.935	457	1156	50286313	930259000	618.935
390	73084	474163	474.163	371	604	34653786	641069000	474.163
391	109302	572347	572.347	363	1014	62558541	1157286000	572.347
392	111680	531642	531.642	403	948	59373871	1098372000	531.642
393	65246	549742	549.742	429	832	35868376	663538000	549.742
394	92815	461561	461.561	359	675	42839578	792500000	461.561
395	69084	428979	428.979	360	589	29635528	548235000	428.979
396	40542	745572	745.572	527	1739	30227120	559179000	745.572
397	69570	623162	623.162	409	957	43353599	802009000	623.162
398	169737	586423	586.423	333	899	99537503	1841369000	586.423
399	91625	526709	526.709	366	932	48259906	892772000	526.709
400	62327	918957	918.957	631	1334	57275678	1059557000	918.957
401	93734	454466	454.466	339	580	42598703	788044000	454.466
402	89625	482980	482.98	371	792	43287218	800781000	482.98
403	72165	599312	599.312	359	904	43249379	800081000	599.312
404	9244	635871	635.871	507	798	5877752	108734000	635.871

## Sheet: Olaparib BRCA2
	area	mean	min	max			mean
1	43.03	294.64	225	395	12677.9	234532	294.64
2	28.87	323.55	262	441	9339.51	172774	323.55
3	151.57	255.83	204	389	38777	717346	255.83
4	47.52	315.17	252	426	14975.6	277037	315.17
5	96.98	260.59	211	379	25270.8	467491	260.59
6	42.49	331.82	244	573	14098.2	260807	331.82
7	51.84	308.52	236	471	15993.7	295872	308.52
8	51.19	340.68	268	565	17439.8	322623	340.68
9	66.49	363.44	269	639	24165.1	447036	363.44
10	56.87	366.79	266	771	20858.3	385863	366.79
11	53.41	316.67	244	561	16912.7	312872	316.67
12	129.79	303.47	238	593	39386.9	728629	303.47
13	54.33	333.52	263	708	18118.9	335186	333.52
14	134.76	291.5	237	547	39282.7	726701	291.5
15	51.35	671.72	319	1469	34495.2	638136	671.72
16	105.79	379.1	272	621	40104.1	741896	379.1
17	70	323.53	258	476	22647.8	418968	323.53
18	61.19	297.49	246	579	18204.2	336764	297.49
19	63.62	318.21	254	550	20245.8	374533	318.21
20	48.81	318.94	266	377	15568.2	288001	318.94
21	53.46	326.9	239	594	17476.4	323300	326.9
22	51.89	331.04	250	839	17178.9	317796	331.04
23	100.98	523.63	305	949	52874.8	978144	523.63
24	52.54	467.73	296	738	24575.8	454634	467.73
25	111.9	285.57	238	464	31954	591125	285.57
26	74.06	370.92	270	778	27469.5	508165	370.92
27	75.46	350.85	271	548	26476.3	489792	350.85
28	66.06	443.16	273	638	29273.4	541536	443.16
29	233.96	352.11	243	744	82378	1523931	352.11
30	107.9	289.76	235	370	31263.7	578355	289.76
31	60.92	318.17	255	477	19383.5	358581	318.17
32	94.81	287.17	234	434	27228	503697	287.17
33	114.71	386.05	256	793	44282.8	819199	386.05
34	102.54	401.42	281	744	41163.5	761493	401.42
35	106.06	278.08	233	422	29492.2	545584	278.08
36	111.73	371.32	263	591	41489.7	767528	371.32
37	108.82	401.1	252	938	43646.3	807423	401.1
38	60.06	340.51	245	1219	20449.8	378306	340.51
39	82.06	351.9	251	742	28876.2	534187	351.9
40	261.2	652.04	237	3421	170312	3150651	652.04
41	105.9	485.81	238	433	30265.8	559894	485.81
42	59.62	674.97	227	400	16394.8	303291	674.97
43	57.25	503.39	266	1282	28816.6	533086	503.39
44	70.27	347.46	267	731	24417.4	451704	347.46
45	55.68	305.95	251	546	17034.8	315132	305.95
46	94.22	332.19	263	525	31298.8	579005	332.19
47	125.03	304.85	235	440	38115.6	705109	304.85
48	86.87	335.97	240	672	29185.2	539904	335.97
49	155.9	342.93	259	585	53462.7	989019	342.93
50	114.55	473.29	282	1031	54212.8	1002896	473.29
51	60.06	300.57	256	394	18051.3	333936	300.57
52	100.98	274.65	223	531	27733	513040	274.65
53	106.49	388.19	255	682	41338.8	764736	388.19
54	104	295.75	216	531	30759	569019	295.75
55	82.65	318.21	251	642	26301.1	486550	318.21
56	99.79	469.92	280	1243	46892.7	867479	469.92
57	58.49	340.81	275	652	19933.8	368761	340.81
58	126.92	344.33	250	643	43703.5	808482	344.33
59	103.79	372.31	253	752	38641.6	714841	372.31
60	95.95	360.43	252	612	34583.4	639767	360.43
61	570.24	361.66	253	1094	206234	3815182	361.66
62	37.24	303.43	259	371	11301	209061	303.43
63	112.06	309.63	253	567	34696.4	641857	309.63
64	55.68	315.07	257	623	17542.2	324517	315.07
65	60.22	336.8	247	681	20281.4	375191	336.8
66	71.14	286.81	236	343	20402.8	377436	286.81
67	84.98	429.38	276	866	36487.5	674991	429.38
68	63.84	295.21	241	417	18846.5	348647	295.21
69	71.62	321.99	241	747	23062.3	426635	321.99
70	59.25	315.36	258	559	18683.8	345637	315.36
71	37.57	329.69	248	536	12386.2	229135	329.69
72	57.35	338.75	216	685	19428.6	359415	338.75
73	115.25	330.37	249	538	38074.2	704344	330.37
74	252.98	383.39	256	1169	96990.4	1794249	383.39
75	132.82	309.68	242	487	41130.4	760881	309.68
76	136.87	337.68	240	615	46218.5	855007	337.68
77	131.3	320.73	243	613	42112.5	779050	320.73
78	111.63	359.4	248	649	40119	742171	359.4
79	105.41	281.82	228	424	29706.5	549547	281.82
80	83.03	272.93	215	447	22661.6	419222	272.93
81	16.43	296.58	230	421	4873.66	90159	296.58
82	19.41	336.67	256	459	6533.56	120866	336.67
83	22.49	507.92	339	759	11421.9	211296	507.92
84	91.63	469.34	299	756	43003.8	795538	469.34
85	30.22	269.01	223	342	8128.82	150377	269.01
86	25.41	308.14	260	418	7828.8	144827	308.14
87	35.73	318.67	242	504	11386.6	210644	318.67
88	110.82	363.21	231	588	40249.4	744583	363.21
89	97.03	337.3	255	551	32728.1	605446	337.3
90	90.27	274.04	234	325	24739.1	457654	274.04
91	112.87	300.16	233	472	33878.4	626725	300.16
92	90.49	486.83	313	867	44053.6	814958	486.83
93	92.44	305.15	250	462	28206.9	521807	305.15
94	151.95	367.43	226	638	55831.6	1032842	367.43
95	89.84	345.53	259	560	31043	574272	345.53
96	66.11	248.44	207	352	16424.5	303841	248.44
97	144.82	305.53	228	423	44246	818518	305.53
98	73.62	385.63	267	673	28392.1	525232	385.63
99	56.54	331.86	256	538	18764.5	347129	331.86
100	162.87	310.66	225	631	50598.3	936030	310.66
101	124.33	380.07	249	783	47253.5	874154	380.07
102	86.49	278.94	234	339	24125.1	446297	278.94
103	103.57	272.48	223	420	28221.4	522075	272.48
104	135.95	307.55	231	509	41811.9	773488	307.55
105	120.87	274.42	228	472	33168.6	613595	274.42
106	76.44	432.7	231	700	33074	611844	432.7
107	65.84	398.99	231	518	19685.5	364166	398.99
108	56.81	354.83	267	663	20158.9	372925	354.83
109	94.6	334.07	266	494	31602.4	584621	334.07
110	72.11	311.87	255	619	22488.9	416028	311.87
111	185.09	266.42	202	352	49310.7	912210	266.42
112	62.54	373.89	258	607	23384.4	432594	373.89
113	98.11	378.21	275	609	37107.2	686456	378.21
114	83.46	553.79	218	315	21181.9	391850	553.79
115	119.09	306.34	238	584	36480.4	674860	306.34
116	72.92	367.57	275	601	26804	495853	367.57
117	110.44	301.17	244	690	33260.1	615287	301.17
118	71.41	372.33	264	509	26587.5	491849	372.33
119	89.3	335.59	261	518	29968.7	554399	335.59
120	89.63	334.56	255	583	29984.9	554698	334.56
121	120.22	276.77	216	369	33273.5	615534	276.77
122	106.54	320.31	249	518	34127.4	631331	320.31
123	57.25	326.07	248	531	18666	345306	326.07
124	112.6	348.08	245	730	39194.1	725061	348.08
125	103.84	371.3	227	424	28171.8	521158	371.3
126	77.73	288.39	220	459	22417.5	414707	288.39
127	68.87	490.42	279	1148	33773.9	624791	490.42
128	84.76	307.03	246	421	26024.1	481426	307.03
129	110	294.01	240	553	32342.2	598306	294.01
130	145.9	276.71	224	501	40371.3	746838	276.71
131	92.81	364.21	266	599	33803.9	625347	364.21
132	106.49	353.55	260	539	37649.6	696489	353.55
133	150.98	277.42	234	388	41884.9	774840	277.42
134	149.47	277.77	209	452	41516.4	768022	277.77
135	107.57	314.19	235	429	33798.2	625242	314.19
136	118.65	276.37	237	342	32792.1	606630	276.37
137	81.57	328.42	256	610	26789.5	495585	328.42
138	119.25	275.25	220	484	32822.7	607195	275.25
139	152.87	295.87	242	480	45229.3	836708	295.87
140	117.68	271.32	229	328	31929.6	590673	271.32
141	97.25	248.59	205	305	24174.4	447209	248.59
142	80.65	342.55	256	609	27627.5	511088	342.55
143	198.76	412.48	241	1210	81986.3	1516685	412.48
144	103.19	386.36	270	707	39869.6	737558	386.36
145	96.6	357.67	231	554	34550.1	639151	357.67
146	112.49	260.98	222	391	29357.6	543094	260.98
147	61.79	334.17	255	475	20647.2	381957	334.17
148	148.82	268.3	220	321	39927.9	738637	268.3
149	134.98	285.21	237	506	38497.2	712170	285.21
150	112.98	250.17	206	306	28263.4	522852	250.17
151	90.76	370.53	240	662	33629.2	622115	370.53
152	77.79	319.4	240	575	24845.2	459617	319.4
153	95.3	299.53	237	518	28546	528079	299.53
154	118.49	246.62	206	320	29222.5	540595	246.62
155	42.6	376.19	282	621	16024.4	296439	376.19
156	128.82	321.99	242	598	41476.9	767291	321.99
157	151.74	447.82	271	1155	67950.8	1257039	447.82
158	98.6	299.19	231	757	29500	545728	299.19
159	115.3	296.73	221	397	34213.3	632921	296.73
160	76.65	303.37	236	558	23253.5	430173	303.37
161	129.09	240.55	205	323	31051.9	574436	240.55
162	98.38	353.57	257	626	34785.4	643504	353.57
163	97.84	337.81	246	630	33052.4	611445	337.81
164	102.33	257.23	214	319	26322.4	486945	257.23
165	92.17	310.92	232	480	28655.9	530112	310.92
166	89.14	277.56	232	563	24741	457690	277.56
167	141.74	443.41	199	412	34500	638224	443.41
168	40.92	292.51	245	393	11969.6	221428	292.51
169	120.33	778.53	383	1453	93680.4	1733017	778.53
170	73.03	280.01	232	377	20449.2	378295	280.01
171	95.08	340.14	251	1002	32342.1	598305	340.14
172	111.25	307.17	233	580	34171.5	632147	307.17
173	122.28	319.25	218	588	39036.8	722151	319.25
174	98.54	299.59	219	551	29523.2	546156	299.59
175	123.25	303.4	228	679	37393.1	691745	303.4
176	112.92	327.48	229	651	36980.8	684116	327.48
177	97.3	391.23	216	709	38066.9	704210	391.23
178	67.08	471.33	249	955	31618.4	584917	471.33
179	29.95	360.68	258	474	10801.2	199814	360.68
1	112.33	301.54	219	494	33871.9	626605	301.54
2	32.38	251.04	214	317	8128.6	150373	251.04
3	26.81	310.03	244	430	8312.55	153776	310.03
4	153.9	435.82	241	1004	67072.5	1240791	435.82
5	132.87	352.84	224	662	46882.6	867292	352.84
6	90.17	351.66	243	616	31707.5	586564	351.66
7	28.97	237.14	199	349	6870.98	127108	237.14
8	81.41	293.44	231	556	23888.3	441915	293.44
9	74.44	323.1	238	515	24050.3	444913	323.1
10	123.79	689.21	246	1266	85316.7	1578294	689.21
11	89.25	271.59	220	406	24238.7	448397	271.59
12	88.38	352.03	212	382	22274.5	412061	352.03
13	101.9	328.9	227	563	33513.4	619973	328.9
14	83.57	274.46	218	407	22936.9	424316	274.46
15	64.11	304.35	237	478	19512.3	360963	304.35
16	107.79	317.26	223	623	34196.8	632616	317.26
17	75.68	332.36	245	662	25152.5	465303	332.36
18	87.57	334.76	249	550	29315.2	542310	334.76
19	105.79	280.26	224	388	29648.2	548469	280.26
20	62.16	695.55	262	2472	43238.8	799885	695.55
21	135.95	301.5	228	518	40989.7	758278	301.5
22	93.19	313.94	236	470	29257.2	541237	313.94
23	70.81	317.33	239	581	22471.2	415701	317.33
24	174.17	340.26	241	657	59263.5	1096330	340.26
25	87.95	328.73	255	543	28911.3	534837	328.73
26	137.95	332.64	222	589	45888.2	848897	332.64
27	254.33	753.24	260	1488	191575	3543986	753.24
28	119.03	293.77	225	453	34967.6	646874	293.77
29	179.2	311.58	225	892	55834.8	1032901	311.58
30	58.54	413.31	248	677	24196.5	447617	413.31
31	16.27	269.41	220	350	4383.48	81091	269.41
32	74.06	269.48	231	331	19957.1	369192	269.48
33	76.6	310.79	244	501	23805.6	440385	310.79
34	76.92	290.16	236	405	22320	412904	290.16
35	74.06	291.42	242	638	21582.1	399252	291.42
36	88	305.89	238	524	26919.4	497988	305.89
37	78.44	272.53	226	314	21375.8	395436	272.53
38	81.19	273.29	237	346	22188.7	410475	273.29
39	115.3	445.31	236	916	51344.9	949843	445.31
40	170.71	353.35	241	745	60319.9	1115872	353.35
41	31.35	327.2	234	563	10258.5	189775	327.2
42	71.73	288.88	237	400	20722	383341	288.88
43	82	478.6	263	2448	39247.2	726043	478.6
44	90.71	327.11	251	578	29670.7	548886	327.11
45	103.03	366.94	258	707	37806.6	699394	366.94
46	144.38	319.93	227	591	46193.2	854539	319.93
47	72.98	343.01	246	949	25031.7	463068	343.01
48	83.95	333.48	268	721	27995.2	517891	333.48
49	117.14	387.64	239	1103	45408.3	840020	387.64
50	117.57	381.3	238	986	44829.9	829319	381.3
51	72.22	271.98	222	498	19642.2	363366	271.98
52	100.92	319.02	239	547	32196.1	595603	319.02
53	78.27	318.86	237	677	24958.6	461715	318.86
54	61.08	274.82	230	370	16786.8	310543	274.82
55	102.44	317.51	263	526	32525	601689	317.51
56	97.57	396.84	281	782	38720.6	716301	396.84
57	141.95	342.59	259	554	48631.9	899653	342.59
58	116.55	424.38	244	1037	49459.4	914961	424.38
59	74.81	273.32	224	472	20448	378272	273.32
60	60.92	281.11	227	338	17125.7	316813	281.11
61	143.74	359.86	248	865	51725	956874	359.86
62	144.76	364.66	247	816	52788.6	976549	364.66
63	144.38	341.39	278	505	49290.7	911840	341.39
64	68.65	317.38	235	627	21788.5	403071	317.38
65	114.87	308.14	260	440	35395.8	654796	308.14
66	111.09	411.21	273	807	45679.9	845044	411.21
67	144.28	627.72	250	1611	90565.2	1675388	627.72
68	66.98	332.78	240	505	22288	412312	332.78
69	29.35	319.57	255	583	9380.22	173527	319.57
70	126.82	312.4	259	447	39617.8	732899	312.4
71	58.65	350.27	253	490	20543.9	380047	350.27
72	80.98	572.45	257	1360	46354.6	857525	572.45
73	67.79	348.9	239	704	23650.5	437516	348.9
74	54.33	330.74	240	560	17967.8	332390	330.74
75	93.79	324.22	255	551	30407.9	562523	324.22
76	84.6	316.26	261	555	26755.2	494951	316.26
77	72.81	391.36	259	818	28496.6	527166	391.36
78	81.84	350.25	279	576	28664.9	530279	350.25
79	85.46	305.85	240	500	26138.6	483545	305.85
80	72	293.79	244	463	21153.6	391326	293.79
81	83.08	301.16	249	437	25021.9	462887	301.16
82	60.27	304.85	241	366	18374.2	339909	304.85
83	58.92	281.32	229	427	16576	306643	281.32
84	53.68	323.68	234	952	17374.2	321410	323.68
85	76.38	284.86	240	471	21758.2	402511	284.86
86	77.9	305.39	227	708	23788.6	440072	305.39
87	81.79	344.09	247	619	28142.1	520607	344.09
88	82.22	485	216	593	23432.2	433478	485
89	150.06	523.89	240	3464	78614.9	1454317	523.89
90	46.27	295.74	250	347	13684.5	253153	295.74
91	44.06	308.62	233	517	13596.5	251525	308.62
1	118.38	333.42	224	618	39471.2	730188	333.42
2	154.28	345.18	239	795	53253.1	985143	345.18
3	78.81	285.78	236	655	22523.2	416662	285.78
4	83.68	307.47	240	391	25729	475968	307.47
5	259.2	379.79	252	860	98442.3	1821109	379.79
6	96.49	294.55	224	615	28421.6	525779	294.55
7	92.33	306.67	221	517	28314.5	523796	306.67
8	97.25	302.25	236	503	29392.7	543743	302.25
9	105.3	428.5	252	910	45121.9	834722	428.5
10	99.19	424.45	251	817	42102.8	778871	424.45
11	113.14	344.59	245	630	38986.4	721220	344.59
12	116.22	383.37	248	728	44556	824253	383.37
13	83.9	297.81	244	460	24985.2	462208	297.81
14	239.04	409.22	256	929	97818.9	1809577	409.22
15	127.3	396.39	263	819	50461	933491	396.39
16	137.52	1016.63	442	4095	139806	2586307	1016.63
17	69.41	324.75	231	740	22540	416973	324.75
18	122.28	323.64	230	842	39573.7	732084	323.64
19	185.25	385.23	261	1016	71364.2	1320185	385.23
20	135.41	320.14	247	548	43350.5	801952	320.14
21	73.19	301.23	244	563	22047.9	407869	301.23
22	70.11	304.76	227	711	21367	395273	304.76
23	132.33	313.89	233	666	41537.1	768405	313.89
24	61.25	290.8	246	785	17810.1	329473	290.8
25	80.92	314.73	235	510	25468.6	471150	314.73
26	44.43	325.8	233	589	14476.5	267805	325.8
27	55.68	377.36	285	694	21010.6	388681	377.36
28	62.6	286.18	240	385	17913.8	331391	286.18
29	61.19	313.23	229	453	19167.3	354581	313.23
30	131.41	371.03	277	865	48756.7	901963	371.03
31	96.81	390.97	246	1444	37852	700233	390.97
32	100.6	351.12	247	788	35322.1	653432	351.12
33	58.43	295.02	236	461	17239.5	318918	295.02
34	61.46	284.7	231	491	17498.2	323703	284.7
35	103.14	347.5	243	820	35840.7	663025	347.5
36	47.08	336.8	253	935	15857.6	293353	336.8
37	43.08	512.71	280	1476	22089.2	408633	512.71
38	101.84	365.04	244	1039	37176.5	687737	365.04
39	109.73	359.05	247	926	39400.5	728879	359.05
40	54.11	424.68	291	1276	22979.5	425104	424.68
41	62	313.45	238	657	19434.7	359528	313.45
42	94.11	619.55	272	1431	58307.3	1078641	619.55
43	25.08	288.15	236	475	7227.37	133701	288.15
44	125.14	330.99	236	615	41420.3	766245	330.99
45	53.84	407.3	287	871	21928.9	405669	407.3
46	73.41	307.92	226	549	22603.8	418153	307.92
47	54.92	688.52	317	1905	37814.5	699540	688.52
48	47.79	398.52	274	954	19043.5	352290	398.52
49	53.73	425	280	1095	22836.1	422450	425
50	55.52	355.69	239	1648	19746.4	365293	355.69
51	108.65	278.73	231	569	30284.4	560238	278.73
52	161.63	593.49	274	3230	95925.3	1774546	593.49
53	60.33	293.19	223	541	17687	327196	293.19
54	127.41	278.41	219	643	35471.9	656204	278.41
55	129.25	370.23	264	779	47851.2	885212	370.23
56	61.25	436.98	271	1752	26763.1	495097	436.98
57	98.65	326.94	248	545	32253.3	596661	326.94
58	90.81	288.08	235	405	26162	483978	288.08
59	94.49	287.09	232	760	27127.5	501838	287.09
60	134.17	368.8	244	809	49481.4	915369	368.8
61	96.92	329.83	240	599	31967.9	591382	329.83
62	73.79	332.98	256	569	24569.9	454524	332.98
63	105.36	290.47	231	583	30603	566132	290.47
64	106.06	722.12	276	2460	76587.4	1416809	722.12
65	121.3	448.74	256	1609	54433.1	1006972	448.74
66	150.87	349.92	265	737	52792.5	976622	349.92
67	59.79	320.58	237	844	19166	354556	320.58
68	53.79	408.24	270	1182	21957.8	406202	408.24
69	141.03	347.4	249	828	48994.3	906358	347.4
70	60.54	328.7	256	644	19900.6	368146	328.7
71	68.22	343.5	264	782	23433.5	433502	343.5
72	90.87	339.93	259	549	30888.7	571418	339.93
73	52.33	358.5	268	831	18759	347028	358.5
74	136.49	360.6	251	798	49219.3	910520	360.6
75	90.27	376.37	238	1038	33976.8	628546	376.37
76	48.87	537.26	271	1556	26254.2	485682	537.26
77	93.14	615.37	305	2241	57314.4	1060274	615.37
78	58.65	413.18	311	818	24233.4	448300	413.18
79	52.27	401.58	274	586	20991.7	388330	401.58
80	73.89	328.54	233	600	24277.5	449116	328.54
81	60.27	349.35	262	825	21056.5	389530	349.35
82	114.27	365.01	256	950	41711	771622	365.01
83	87.14	248.68	210	481	21669.4	400868	248.68
84	195.09	370.59	260	733	72298.6	1337470	370.59
85	84.6	303.04	245	632	25636.7	474259	303.04
86	16.76	333.34	254	510	5585.85	103334	333.34
87	112.76	285.14	211	832	32152.3	594793	285.14
88	58.54	276.23	228	352	16171.1	299154	276.23
89	71.25	351.71	259	851	25057.8	463550	351.71
90	117.41	322.81	232	848	37901.5	701150	322.81
91	203.68	687.64	274	1957	140061	2591027	687.64
92	117.25	284.56	211	579	33364.3	617215	284.56
93	96.71	420.77	254	1154	40690.8	752750	420.77
94	60.43	327.12	252	966	19769.2	365716	327.12
95	54.33	412.76	267	720	22423.9	414826	412.76
96	46.33	376.95	269	608	17462.7	323046	376.95
97	30.76	294.52	245	455	9058.85	167582	294.52
1	134.87	346.68	249	690	46756.7	864963	346.68
2	88.6	293.07	225	603	25965.4	480341	293.07
3	25.62	311.4	248	594	7978.86	147603	311.4
4	54.06	445.39	267	797	24075.9	445386	445.39
5	140.65	404.79	250	866	56934.8	1053252	404.79
6	149.2	366.01	233	754	54606.7	1010182	366.01
7	88.27	316.74	217	633	27959.8	517236	316.74
8	122.71	353.33	232	982	43355.9	802051	353.33
9	123.9	333.24	215	908	41287.2	763782	333.24
10	87.63	292.41	231	648	25622.8	474003	292.41
11	134.33	355.86	253	676	47802.3	884307	355.86
12	86.17	287.06	241	483	24734.8	457576	287.06
13	92.54	251.88	209	458	23309.8	431214	251.88
14	122.44	357.84	241	1193	43812.7	810502	357.84
15	77.41	262.72	215	573	20336.8	376215	262.72
16	160.38	367.2	243	1045	58893.8	1089491	367.2
17	151.63	429.76	244	881	65163.1	1205468	429.76
18	68.65	301.74	243	835	20715.1	383213	301.74
19	36.16	413.19	234	1050	14942.3	276421	413.19
20	148.55	418.11	242	1022	62108.5	1148961	418.11
21	155.14	368.96	233	1520	57241.6	1058927	368.96
22	135.68	380.18	247	881	51583.7	954259	380.18
23	146.38	374.08	243	882	54759.5	1013009	374.08
24	149.95	327.25	243	657	49071.2	907781	327.25
25	93.19	429.99	254	955	40072.2	741306	429.99
26	104.06	385.94	254	616	40160.6	742940	385.94
27	117.19	379.8	252	836	44510.8	823416	379.8
28	95.14	413.56	244	640	39345.7	727865	413.56
29	151.2	293.95	232	486	44444.1	822183	293.95
30	88.54	276.09	226	533	24446.6	452243	276.09
31	106.49	328.49	261	520	34981	647123	328.49
32	96.44	363.55	250	1731	35059.7	648578	363.55
33	103.25	336.42	244	741	34734.7	642565	336.42
34	149.57	319.08	249	562	47725.7	882890	319.08
35	87.41	304.47	249	430	26613.5	492330	304.47
36	170.71	307.07	240	864	52420	969730	307.07
37	225.96	290.86	238	594	65721.3	1215795	290.86
38	50.16	287.4	220	350	14417.1	266706	287.4
39	114.38	292.64	240	605	33472.7	619220	292.64
40	85.35	435.27	281	1311	37152.2	687287	435.27
41	106.27	353.55	267	708	37573.7	695085	353.55
42	88.92	326.79	252	570	29059.1	537572	326.79
43	112.44	292.1	240	435	32842.8	607567	292.1
44	85.19	356.13	248	923	30339.7	561261	356.13
45	147.09	281.83	227	675	41454.2	766872	281.83
46	64.44	336.35	258	737	21672.7	400929	336.35
47	80.27	331.03	242	512	26572.7	491575	331.03
48	67.19	328.54	254	600	22075.1	408373	328.54
49	73.73	320.91	248	617	23661.7	437723	320.91
50	104.87	346.53	246	741	36340.8	672277	346.53
51	116.55	534.43	245	1583	62284.8	1152222	534.43
52	85.52	388.56	244	580	33228.4	614701	388.56
53	71.3	371.46	259	809	26485.4	489960	371.46
54	31.41	318.41	221	622	10000.1	184995	318.41
55	254.93	525.51	244	2011	133969	2478327	525.51
56	71.25	316.73	250	697	22565.8	417451	316.73
57	85.57	350.52	250	745	29994.4	554874	350.52
58	73.03	375.88	257	1221	27450.6	507815	375.88
59	76.27	491.11	261	1227	37459	692963	491.11
60	22.92	317.25	240	713	7271.27	134513	317.25
61	23.89	305.52	237	605	7299.81	135041	305.52
1	58.49	289.31	237	672	16921.6	313037
2	62.33	284.94	209	732	17759.2	328531
3	111.36	404.4	253	1470	45032	833058
4	85.68	365.63	256	673	31326.8	579523
5	67.46	729.94	320	1298	49243.6	910970
6	91.57	279.57	231	371	25601	473599
7	33.95	363.55	261	1135	12341.7	228312
8	40.11	367.62	281	878	14745	272772
9	64.33	292.97	236	725	18845.8	348633
10	70.11	317.95	236	566	22291.8	412382
11	33.51	339.99	281	596	11394.7	210794
12	107.57	302.13	226	538	32501.2	601247
13	159.52	3594.74	435	4095	573433	10608087
14	96	375.81	256	685	36079.5	667444
15	87.79	392.6	263	771	34465.6	637587
16	137.25	371.04	233	789	50925.5	942083
17	64.65	991.55	379	1935	64104.9	1185893
18	125.63	333.27	225	707	41867.8	774523
19	150.11	393.75	253	1517	59107.6	1093446
20	88.38	352.14	241	1854	31123	575752
21	39.3	320.54	259	802	12596.7	233030
22	84.17	681.35	358	2476	57346.6	1060869
23	100.11	330.68	230	574	33104.7	612412
24	137.25	335.26	245	577	46014.6	851235
25	35.79	291.49	223	434	10430.9	192964
26	80.33	409.93	277	766	32928.7	609157
27	37.89	335.5	259	788	12713.2	235185
28	185.36	318.05	227	647	58952.8	1090582
29	84.54	502.66	315	986	42497.2	786167
30	41.79	384.47	277	829	16065.3	297196
31	126.06	353.96	237	579	44619.9	825435
32	48.87	391.63	278	977	19137.9	354036
33	76.98	523.39	301	938	40288.7	745311
34	65.3	399.56	269	706	26091.3	482670
35	111.3	411.73	267	1031	45826.3	847753
36	95.73	368.99	261	878	35324.6	653478
37	167.79	416.55	271	993	69893.5	1292977
38	114.27	360.5	250	860	41195.8	762091
39	74.27	319.8	232	563	23752.4	439402
40	97.68	352.54	235	903	34435.5	637031
41	75.84	454.31	284	863	34454.9	637390
42	56.43	330.59	263	539	18656.6	345133
43	69.73	433.18	273	1388	30206.7	558801
44	129.84	318.03	243	759	41293.9	763907
45	114.33	342.34	233	630	39139.3	724048
46	109.09	315.92	228	746	34462.6	637532
47	83.25	324.5	228	779	27013.3	499726
48	59.57	364.76	255	667	21728.8	401966
49	185.79	328.5	251	809	61032	1129046
50	49.79	329.59	244	611	16408.8	303551
51	40.49	355.62	282	431	14398.4	266360
52	83.14	467.99	285	982	38907.7	719764
53	84.11	406.69	294	869	34207.2	632807
54	106.44	476.85	282	1301	50754.1	938913
55	136.98	347.63	215	750	47617.2	880882
56	91.52	397.37	279	765	36366.4	672752
57	88.6	392.39	285	743	34765	643127
58	84.22	520.92	284	1118	43871.7	811594
59	125.68	422.32	248	1145	53077.3	981890
60	88.22	506.92	271	1079	44720.7	827300
61	75.3	294.76	222	522	22195.2	410594
62	98.06	315.56	229	602	30943.4	572429
63	101.9	521.08	317	1327	53096.4	982244
64	38.27	315.66	263	632	12080.7	223484
65	88.81	547.74	278	1084	48647.6	899944
66	118.28	451.52	294	1043	53403.9	987932
67	67.52	417.38	266	747	28180	521308
68	81.57	324.04	230	566	26432.6	488983
69	82.33	381.69	247	1390	31423.4	581309
70	41.73	336.33	252	1142	14035.3	259643
71	150.87	436.41	236	1049	65841.3	1218015
72	85.46	407.87	281	872	34857.6	644839
73	90.81	475.87	287	1140	43216.1	799465
74	79.57	301.75	241	615	24010.3	444172
75	82.6	459.46	297	902	37950.6	702057
76	73.08	289.66	233	495	21169.5	391619
77	94.71	423.17	269	868	40077.2	741399
78	97.63	330.74	250	663	32288.9	597321
79	116.11	333.29	234	606	38699.1	715905
80	104.76	315.44	253	540	33045.7	611321
81	108.22	354.63	234	939	38378.5	709974
82	134.44	340.62	257	698	45792.4	847125
83	100.11	273.06	209	682	27336.7	505709
84	37.73	319.18	271	443	12043	222787
85	71.25	424.72	266	766	30259.9	559785
86	89.14	435.51	267	843	38821	718160
87	86.27	360.36	262	778	31090	575141
88	48.54	347.52	243	918	16869.4	312072
89	80.92	457.9	264	1079	37054.5	685481
90	77.35	386.19	274	711	29873.6	552639
91	105.52	330.76	219	581	34901.4	645649
92	86.27	359.21	224	697	30990.5	573300
93	52.87	376.59	233	1055	19909	368301

## Sheet: fasudil BRCA2
	area	mean	min	max			mean
1	26.7	351.87	251	460	9396.27	173824	351.87
2	105.14	360.06	223	611	37857	700326	360.06
3	39.24	272.5	236	309	10694.3	197836	272.5
4	89.57	278.97	221	365	24987.4	462248	278.97
5	21.03	293.23	227	419	6165.93	114065	293.23
6	32.97	256.16	217	297	8446.83	156260	256.16
7	46.76	312.27	244	419	14601.1	270110	312.27
8	20.6	257.12	215	320	5295.4	97961	257.12
9	111.14	293.63	226	481	32634.1	603707	293.63
10	84.06	382.75	263	836	32172.7	595170	382.75
11	40.65	340.02	247	586	13822.1	255698	340.02
12	47.19	311.34	256	409	14692.3	271796	311.34
13	45.52	323.67	245	466	14732.1	272532	323.67
14	103.46	312.34	228	445	32316	597821	312.34
15	89.84	289.67	226	722	26024.4	481432	289.67
16	97.14	306.82	227	428	29804.2	551355	306.82
17	43.95	326.51	232	587	14349.5	265455	326.51
18	49.19	318.33	255	415	15659.1	289681	318.33
19	48.38	314.83	255	494	15231.7	281775	314.83
20	99.63	293.82	239	430	29271.8	541507	293.82
21	88.87	273.87	236	328	24338.1	450237	273.87
22	45.46	367.31	255	591	16698.5	308909	367.31
23	28.87	279.99	219	680	8082.27	149516	279.99
24	66.54	314.59	247	388	20934.2	387266	314.59
25	200.17	480.04	293	1003	96088.9	1777573	480.04
26	91.52	337.12	250	787	30851.8	570736	337.12
27	93.19	323.18	230	550	30118.4	557168	323.18
28	48.7	307.94	257	429	14998.3	277458	307.94
29	70.98	297.94	248	428	21146.4	391192	297.94
30	55.03	288.8	243	384	15892.3	293996	288.8
31	66.27	360.73	260	696	23906.3	442249	360.73
32	76.44	337.06	255	523	25763.5	476606	337.06
33	75.3	373.83	269	576	28149.9	520752	373.83
34	80	303.14	251	446	24252.1	448645	303.14
35	56	326.52	280	405	18285.6	338270	326.52
36	82.38	331.81	257	581	27335.4	505685	331.81
37	44.49	337.52	253	497	15015.9	277783	337.52
38	91.84	365.68	273	517	33584.7	621291	365.68
39	58.87	452.02	328	742	26609.4	492254	452.02
40	49.08	549.82	342	860	26987	499239	549.82
41	111.46	334.05	264	465	37234.3	688806	334.05
42	39.52	346.3	254	480	13684.1	253146	346.3
43	44.65	266.03	228	303	11878.4	219741	266.03
44	51.46	314.81	256	465	16200.5	299697	314.81
45	86.22	287.73	250	358	24807.8	458925	287.73
46	82.65	400.11	283	680	33070.1	611772	400.11
47	77.84	275.66	228	322	21457.6	396950	275.66
48	108.71	293.98	236	495	31957.2	591184	293.98
49	99.52	313.61	246	665	31210.2	577365	313.61
50	72.44	263.65	224	317	19097.7	353293	263.65
51	47.14	342.12	270	558	16126.7	298331	342.12
52	101.41	632	331	1450	64091.3	1185641	632
53	54	351.77	274	726	18996.2	351416	351.77
54	36.43	289.98	246	414	10565.2	195448	289.98
55	110.11	277.14	231	332	30516.7	564535	277.14
56	82.38	296.08	240	420	24391.4	451223	296.08
57	46.49	205.95	280	719	18871.9	349116	205.95
58	82.06	908.66	286	2631	74562.6	1379352	908.66
59	97.3	461.17	288	855	44872.6	830109	461.17
60	52.92	299.28	251	453	15838.5	293000	299.28
61	80.6	366.43	238	654	29533.4	546346	366.43
62	49.73	305.19	255	457	15177.8	280778	305.19
63	56.92	341.5	262	565	19438.6	359599	341.5
64	130.49	328.46	252	825	42861.5	792906	328.46
65	153.57	351.91	248	617	54044.3	999779	351.91
66	60.54	398.65	327	531	24135.4	446487	398.65
67	98.33	511.7	306	1612	50314.3	930776	511.7
68	94.98	277.23	232	335	26330.3	487090	277.23
69	89.95	334	272	427	30043.1	555774	334
70	65.52	373.02	246	858	24439	452103	373.02
71	114.92	338.94	266	496	38951.7	720578	338.94
72	77.9	303.91	250	394	23672.8	437928	303.91
73	90.27	333.02	258	514	30063.2	556147	333.02
74	45.35	331.94	264	529	15054.6	278498	331.94
75	101.68	305.19	234	571	31031.9	574067	305.19
76	50.16	362.61	287	561	18190	336501	362.61
77	133.63	273.6	228	522	36560.6	676344	273.6
78	43.79	316.5	256	499	13858.4	256369	316.5
79	35.24	275.4	223	440	9706.34	179560	275.4
80	48.22	288.14	247	380	13893.6	257022	288.14
81	169.41	310.58	231	566	52615.9	973355	310.58
82	127.41	318.58	263	413	40590	750884	318.58
83	93.57	359.28	265	596	33618.3	621913	359.28
84	85.52	358.92	266	519	30693.7	567811	358.92
85	86.33	288.92	235	609	24941.9	461406	288.92
86	84.81	381.17	261	526	32328.8	598059	381.17
87	44.27	325.77	264	435	14422.6	266807	325.77
88	48.92	287.08	235	500	14044.3	259809	287.08
89	104.22	410.34	291	663	42765.4	791128	410.34
90	71.03	288.25	232	715	20474.3	378759	288.25
91	128.55	324.47	263	439	41709.1	771586	324.47
92	97.25	331.77	242	655	32263.6	596852	331.77
93	82.49	321.86	253	494	26550.4	491163	321.86
94	116.27	293.51	239	352	34128.4	631349	293.51
95	310.72	226.27	260	1965	256734	4749386	226.27
96	45.84	337.48	250	454	15470.1	286185	337.48
97	46.6	295.29	253	359	13759.4	254538	295.29
98	46.43	313.81	248	582	14571.8	269567	313.81
99	59.35	295.86	244	411	17560.5	324856	295.86
100	80.27	295.1	240	369	23689	438228	295.1
101	40.43	293.76	228	758	11877.8	219730	293.76
102	73.73	289.29	223	446	21330.3	394595	289.29
103	79.25	306.01	251	390	24249.8	448604	306.01
104	53.41	287.73	241	429	15367.2	284282	287.73
105	41.79	309.55	250	598	12934.6	239281	309.55
106	12.27	295.93	248	426	3631.28	67176	295.93
1	50.54	309.64	246	463	15649.8	289509	309.64
2	49.08	301.21	235	622	14784.5	273502	301.21
3	50.98	246.23	208	312	12551.4	232191	246.23
4	47.03	247.75	214	304	11651.5	215543	247.75
5	68.65	290.99	230	479	19976.9	369558	290.99
6	47.73	270.59	210	359	12915.5	238927	270.59
7	107.73	333.27	256	805	35904.3	664202	333.27
8	53.84	249.53	214	296	13434.6	248531	249.53
9	77.19	350.23	237	645	27034.7	500122	350.23
10	49.73	277.51	223	518	13800.9	255307	277.51
11	46.65	346.32	235	564	16156.1	298875	346.32
12	59.89	317.88	223	625	19038.9	352206	317.88
13	94	358.18	246	625	33670.4	622877	358.18
15	116.22	294.75	230	558	34256.1	633712	294.75
16	51.79	282.82	230	342	14646.3	270946	282.82
17	58.6	272.96	227	339	15994.8	295891	272.96
18	29.95	283.73	234	366	8496.89	157186	283.73
19	56.22	308.61	249	459	17349.7	320956	308.61
20	111.57	297.74	239	443	33219.5	614535	297.74
21	51.25	324.13	253	431	16610.3	307278	324.13
22	61.25	294.56	234	403	18040.6	333738	294.56
23	44.38	279.55	226	637	12406.3	229507	279.55
24	44.76	269.37	223	363	12056.6	223038	269.37
25	85.73	275.83	265	892	40794.2	754662	275.83
27	76.49	361.38	247	609	27641.5	511346	361.38
28	45.84	286.05	235	418	13112.5	242571	286.05
29	96.38	315.63	239	476	30420.7	562760	315.63
30	89.08	343.01	240	747	30556.8	565277	343.01
31	65.14	347.92	267	502	22662.8	419245	347.92
32	109.09	425.58	259	696	46424.4	858816	425.58
33	101.79	296.5	243	406	30180.3	558313	296.5
34	47.68	300.87	244	555	14345	265371	300.87
35	79.68	329.19	247	598	26229.2	485220	329.19
36	98.76	436.37	267	740	43096.4	797251	436.37
37	78.76	305.67	265	1367	47702.7	882464	305.67
38	96.49	336.89	246	540	32506.8	601351	336.89
39	81.52	304.32	252	406	24807.1	458912	304.32
40	104.17	345.42	234	774	35980.9	665619	345.42
43	101.57	313.64	250	829	31856.5	589321	313.64
44	56.06	301.23	244	401	16885.8	312374	301.23
45	71.03	354.65	244	1598	25191.1	466016	354.65
46	106.6	456.67	321	720	48680.8	900559	456.67
47	94.81	402.18	247	1136	38132.4	705420	402.18
48	56.27	290.15	239	653	16327.3	302042	290.15
49	56.98	306.93	242	535	17487.2	323501	306.93
50	48.11	294.53	253	402	14170	262134	294.53
51	43.14	222.67	329	1284	26860	496890	222.67
52	101.68	348.13	231	504	35398.2	654841	348.13
53	62.87	286.03	251	333	17981.8	332650	286.03
54	113.19	358.47	244	642	40576.5	750634	358.47
55	51.95	304.15	247	365	15799.8	292284	304.15
56	95.36	395.83	266	1025	37744.2	698240	395.83
57	62.06	316.45	267	379	19637.6	363281	316.45
58	65.08	312.34	264	394	20328.1	376054	312.34
59	44	328.83	250	582	14469.2	267669	328.83
60	53.73	267.43	229	309	14369.3	265822	267.43
61	116.27	335.72	252	627	39035.9	722135	335.72
62	67.52	300.25	246	539	20271.8	375014	300.25
63	64.06	298.38	248	434	19113	353576	298.38
64	55.57	309.16	239	444	17179.9	317815	309.16
65	45.25	418.31	260	1366	18926.6	350128	418.31
66	30.6	331.51	240	505	10142.8	187634	331.51
67	66.16	306.36	255	370	20270.1	374982	306.36
68	35.62	284.75	251	338	10143.5	187647	284.75
69	136.49	418.56	225	912	57130.7	1056875	418.56
70	79.46	472.96	262	833	37583	695258	472.96
71	133.03	376.03	251	559	50024.6	925418	376.03
72	56.81	335.87	258	658	19082	353002	335.87
73	96.98	335.42	243	633	32528.5	601752	335.42
74	51.52	303.87	262	412	15653.8	289584	303.87
75	120.11	317.06	245	511	38082.6	704499	317.06
76	63.3	397.49	272	1160	25160.8	465456	397.49
77	60.33	305.66	253	473	18439.3	341113	305.66
78	53.68	289.05	250	337	15515.7	287029	289.05
79	58.92	278.03	242	335	16381.8	303051	278.03
80	58.81	334.08	263	526	19648.3	363479	334.08
81	44.11	341.57	253	497	15066.7	278722	341.57
82	220.93	300.82	235	479	66459.9	1229459	300.82
83	85.35	353.41	232	994	30165.2	558033	353.41
84	48.54	344.77	260	641	16736.2	309607	344.77
85	104.87	309.94	250	404	32502.9	601280	309.94
86	52	398.65	313	551	20730.5	383498	398.65
87	56.76	401.17	285	625	22770.1	421230	401.17
88	107.19	263.41	271	1773	92552.1	1712144	263.41
89	54.65	405.61	298	789	22166.7	410068	405.61
90	94.38	316.92	252	491	29912	553349	316.92
91	51.14	288.97	233	342	14777	273364	288.97
92	74.71	339.83	248	667	25387.2	469644	339.83
93	53.79	347.28	265	541	18678.8	345544	347.28
94	112.6	362.1	247	720	40771.6	754244	362.1
95	106.17	325.03	244	647	34507.4	638361	325.03
96	70	307.84	246	471	21549.7	398653	307.84
97	52.33	278.4	237	321	14567.9	269496	278.4
98	99.09	360.97	250	617	35766.4	661652	360.97
99	104.11	333.13	246	556	34683.3	641616	333.13
100	45.08	306.09	242	774	13799.6	255282	306.09
101	224.23	297.36	245	411	66675.4	1233444	297.36
102	52.54	323.03	278	731	22227.3	411189	323.03
103	100.87	305.26	237	478	30790.8	569607	305.26
104	95.68	319.63	260	456	30582	565743	319.63
105	111.68	388.58	245	728	43396.2	802797	388.58
106	51.73	280.44	241	329	14507.5	268378	280.44
107	46.65	299.84	262	348	13987.9	258766	299.84
108	62.27	291.94	252	360	18180.2	336320	291.94
109	249.2	308.76	245	421	76943.3	1423394	308.76
110	42.11	293.96	245	438	12378.7	228996	293.96
111	94.87	396.11	264	639	37578.3	695170	396.11
112	72.76	385.87	259	648	28075.5	519375	385.87
113	190.44	308.14	221	556	58681.7	1085568	308.14
114	93.68	313.84	253	392	29400.5	543887	313.84
115	56.6	296.36	234	374	16773	310287	296.36
116	94.87	355.55	250	532	33730.6	623990	355.55
117	62.76	320.3	257	422	20101.8	371869	320.3
118	44.27	337.62	253	514	14947	276509	337.62
119	103.79	279.22	223	347	28979.6	536101	279.22
120	86.49	350.87	244	632	30346.8	561392	350.87
121	118.38	282.69	227	432	33465.2	619081	282.69
122	48.76	316.78	257	398	15446	285740	316.78
123	48.49	325.11	267	455	15764	291623	325.11
124	81.41	294.04	248	387	23937.2	442820	294.04
125	81.19	441.03	248	792	35808.2	662424	441.03
126	51.3	290.87	244	390	14921.3	276033	290.87
127	140.98	323.49	244	884	45605.7	843671	323.49
128	80.38	298.27	236	490	23975.5	443528	298.27
129	98.44	272.18	248	1060	46479.4	859834	272.18
130	50	303.48	251	427	15174.8	280723	303.48
131	172.17	324.39	251	463	55850.5	1033192	324.39
132	73.14	292.04	248	377	21359.6	395136	292.04
133	41.24	304.6	244	384	12563.3	232412	304.6
134	94.44	337.96	254	454	31916	590423	337.96
135	55.84	292.14	228	514	16312.9	301777	292.14
136	60.11	289.37	245	374	17394.2	321780	289.37
137	53.14	284.29	245	330	15106.4	279457	284.29
138	96.98	398.69	241	581	38663.9	715254	398.69
139	122.98	316.01	242	546	38862.6	718929	316.01
140	85.9	366.22	235	575	31456.5	581921	366.22
141	84	325.76	227	471	27365	506232	325.76
142	98.17	331.51	237	455	32543.2	602024	331.51
143	46.38	256.21	209	344	11883.3	219832	256.21
144	36.43	327.11	251	451	11918	220474	327.11
145	60.49	281.46	222	363	17025.5	314959	281.46
146	117.09	304.89	237	497	35698.7	660399	304.89
147	104	299.61	229	401	31160.8	576452	299.61
148	64.98	277.06	235	319	18001.9	333021	277.06
149	67.03	307.59	239	446	20617.8	381414	307.59

## Sheet: NT BRCA2
	area	mean	min	max
1	39.73	306.49	254	372	12177.4	225273
2	20.6	272.88	225	517	5620.12	103968
3	51.84	289.73	235	717	15019.4	277847
4	50.76	281.53	231	387	14290.1	264356
5	99.95	286.95	236	429	28680.8	530573
6	52.43	275.76	233	455	14459.5	267490
7	54.43	276.05	227	474	15026.6	277980
8	52.27	289.29	237	431	15122	279745
9	51.68	275.72	236	453	14248.8	263592
10	44.33	263.09	227	425	11661.8	215734
11	45.3	266.48	231	493	12071.5	223313
12	49.57	333.02	254	665	16507.9	305383
13	71.3	270.35	230	393	19276.3	356597
14	49.57	325.47	243	769	16133.4	298455
15	78.11	269.92	227	389	21083.8	390034
16	51.79	254.89	215	330	13199.7	244185
17	41.62	268.72	225	307	11185	206915
18	97.63	306.61	251	461	29932.6	553730
19	83.9	293.58	245	441	24630.2	455640
20	90.87	286.28	228	550	26014.1	481242
21	58	267.8	220	312	15533.2	287352
22	52.81	309.04	256	528	16321.3	301932
23	115.03	305.77	246	491	35173.1	650675
24	69.25	311.37	252	503	21560.9	398860
25	54.65	360.26	251	780	19688.6	364224
26	128.28	300.6	241	435	38559.5	713321
27	62.92	297.15	244	662	18696.8	345877
28	87.35	318.62	267	488	27832.9	514888
29	99.14	315.28	231	449	31256.2	578217
30	124.17	344.74	274	502	42805.6	791872
31	65.03	299.63	253	444	19484.8	360455
32	57.14	355.03	274	749	20285.6	375268
33	114.11	337.55	243	486	38518.8	712568
34	31.24	317.67	268	621	9925.43	183613
35	51.52	275.65	227	366	14200.5	262699
36	45.03	270.38	231	325	12174.8	225225
37	53.25	288.4	240	398	15356.2	284078
38	44.87	304.21	262	504	13648.8	252493
39	86.38	353.09	280	536	30500.5	564237
40	48.11	294.6	256	349	14173.1	262191
41	51.89	291.41	247	525	15122.3	279751
42	53.84	321.45	263	724	17307	320166
43	63.25	289.77	241	537	18326.8	339033
44	58	273.9	231	403	15887.1	293899
45	38.43	288.18	233	432	11075.9	204896
46	15.78	448.98	272	1136	7086.83	131101
47	53.68	325.15	280	396	17453.1	322870
48	70.27	314.92	249	393	22130.1	409391
49	94.81	322.24	259	499	30552.7	565202
50	94.71	314.86	258	397	29819.2	551632
51	75.62	322.3	269	500	24373.9	450899
52	57.35	289.65	248	333	16612.3	307316
53	47.35	302.14	250	571	14307.2	264672
54	96.38	304.7	260	481	29367.3	543273
55	15.3	297.47	257	408	4550.67	84184
56	100.33	359.08	266	612	36025.9	666452
57	82.33	291	254	357	23957.6	443198
58	56.92	296.83	243	378	16896.2	312566
59	68.49	323.5	265	497	22156	409869
60	135.79	347.94	250	692	47246	874016
61	61.52	333.98	284	587	20544.9	380065
62	103.95	323.72	247	458	33651.2	622522
63	58.11	288.16	235	527	16745.2	309773
64	54.87	335.76	269	434	18422.3	340799
65	473.69	331.15	247	642	156862	2901830
66	63.08	309.84	262	367	19545.5	361578
67	56.43	280.04	243	319	15804.2	292365
68	73.68	323.23	264	606	23815.1	440562
69	58.81	295.44	251	366	17376.1	321444
70	105.73	321.15	256	713	33956.1	628163
71	102.11	887.01	357	1702	90574.3	1675556
72	58.22	280.62	248	322	16337.3	302228
73	54.98	304.57	258	471	16743.5	309743
74	86.27	309.6	249	466	26710.2	494118
75	110.22	322.28	262	508	35521.8	657126
76	55.25	348.51	275	519	19253.7	356179
77	30.06	297.94	252	505	8954.8	165657
78	64.38	309.06	244	799	19897.6	368091
79	54.6	279.01	238	326	15233.3	281805
80	62.11	309.18	249	465	19203.6	355252
81	66.11	278.45	241	327	18408.6	340545
82	56.11	318.4	262	516	17865.5	330499
83	51.68	292.74	253	357	15128.2	279860
84	102.54	327.78	238	722	33612.2	621801
85	58.43	362.58	282	659	21187.5	391952
86	57.89	294.17	251	378	17030.8	315058
87	91.36	319.33	258	484	29172.5	539670
88	58.81	267.47	220	352	15731	291011
89	120.65	424.4	280	972	51205.1	947256
90	63.89	326.8	265	511	20880.8	386280
91	62.33	290.63	252	345	18113.9	335094
92	29.46	295.58	244	425	8708.03	161092
93	60.65	324.31	243	543	19669.7	363874
94	91.03	405.73	257	778	36934.2	683255
95	65.19	319.17	273	453	20807.4	384922
96	51.89	360.74	287	657	18720.1	346308
97	46.27	278.87	238	379	12903.8	238711
98	63.46	313.43	259	383	19890.6	367961
99	112.27	332.59	249	498	37341.3	690786
100	118.44	321.71	249	571	38102.5	704868
101	86.44	310.69	250	469	26854.6	496790
102	57.57	270.17	235	364	15553.6	287730
103	60.38	299.49	240	689	18083.6	334533
104	61.46	299.18	254	476	18387.9	340163
105	116.76	304.17	250	370	35515.4	657008
106	80.44	297.65	242	535	23941.5	442900
107	241.42	306.89	239	821	74087.6	1370565
108	124.17	369.77	258	820	45912.7	849351
109	117.57	356.22	243	923	41881.8	774782
110	52.22	284.08	238	398	14834.1	274420
111	89.95	334.87	241	900	30121.8	557230
112	63.03	291.14	251	410	18350.5	339470
113	115.25	318.83	250	540	36744.5	679746
114	65.52	374.95	271	605	24565.3	454440
115	65.41	329.57	263	469	21556.3	398775
116	164.44	354.02	244	768	58214.4	1076923
117	85.95	318.07	249	496	27338.1	505735
118	106.44	531.04	250	986	56522.4	1045622
119	13.84	271.75	239	313	3760.53	69567
120	48.65	288.19	243	422	14020.6	259371
121	10.81	275.22	239	323	2975.47	55044
122	56.38	425.69	271	1677	24000.9	443998
123	148.6	313.95	245	563	46652.4	863035
124	36.16	284.86	246	352	10301.5	190571
125	72.76	294.67	244	561	21440.3	396630
126	116.17	314.98	242	471	36590.7	676900
127	63.41	340.26	263	890	21575.5	399130
128	51.03	298.85	231	486	15250	282113
129	74.6	329.47	267	425	24577.8	454670
130	91.79	317.89	232	567	29178.2	539774
131	66.11	320.32	255	602	21176.6	391752
132	78.49	280.58	242	328	22022.6	407401
133	170.01	313.63	240	590	53318.4	986351
134	61.57	286.74	247	373	17654.4	326593
135	69.19	348.22	276	535	24094.3	445727
136	67.46	307.33	257	536	20733.4	383552
137	44.06	305.74	223	585	13469.7	249180
138	58.71	332.42	282	633	19514.7	361007
139	76.44	378.22	258	621	28909.3	534801
140	53.19	268.04	230	462	14257.3	263750
141	60.43	384.59	284	714	23242.7	429973
142	74.49	312.09	242	813	23247.2	430055
143	60.92	328.44	242	936	20009	370152
144	82.87	324.15	258	434	26861.6	496919
145	71.52	307.6	255	543	21998.3	406953
146	68.98	304.64	243	669	21012.8	388720
147	98.87	314.07	249	410	31052	574439
148	70.6	360.17	254	687	25426.8	470376
149	55.89	293.64	240	655	16412.8	303624
150	59.46	274.59	238	337	16327.6	302049
151	58.27	319.14	255	617	18597	344030
152	82.49	299.02	254	514	24666.3	456309
153	46.6	272.86	223	345	12714.2	235204
154	66.54	303.43	246	511	20191	373519
155	91.95	294.3	246	582	27060.6	500601
156	125.19	346.08	262	510	43327.5	801526
157	70.11	297.2	237	450	20836.8	385465
158	59.95	321.14	262	404	19252.1	356149
159	57.62	270.12	237	314	15565.2	287945
160	32.06	256.82	217	300	8232.33	152292
161	33.24	267.61	228	342	8896.47	164578
162	50.76	340.47	278	568	17282	319703
163	54.76	296.29	241	459	16224.4	300139
164	60.27	289.14	247	338	17427	322387
165	99.36	275.21	212	457	27343.5	505835
166	59.52	274.81	237	311	16355.4	302563
167	79.46	298.78	247	528	23741.6	439202
168	179.52	285.9	218	641	51324.8	949471
169	100	261.71	222	320	26171.9	484161
170	62.49	298.94	251	561	18680.3	345572
171	76.98	360.88	254	627	27779.5	513899
172	42.33	264.94	218	307	11214	207451
173	39.41	325.24	240	438	12816.8	237102
174	26.65	321.81	233	747	8576.24	158654
175	17.73	281.46	251	321	4990.47	92320
176	15.73	276.09	249	316	4342.93	80341
177	14.49	279.13	237	353	4043.84	74808
1	22.33	273.86	220	319	6113.92	113103
2	55.46	479.38	238	349	15495	286646
3	72.81	280.61	233	418	20432.3	377982
4	100.17	292.05	239	562	29253.6	541170
5	17.3	259.01	230	289	4480.34	82883
6	75.62	271.34	223	383	20519.8	379601
7	110.6	300.18	246	440	33199.7	614170
8	56.49	243.4	198	371	13749.4	254353
9	119.63	349.11	249	740	41763	772584
10	152.71	318.42	254	490	48625.2	899529
11	59.3	272.89	234	418	16182	299355
12	161.79	315	253	487	50964	942795
13	63.62	344.27	262	656	21903.9	405205
14	57.89	295.84	221	630	17127.2	316841
15	101.57	339.08	236	554	34440.7	637127
16	66.81	267.26	228	353	17856.8	330338
17	56.6	287.57	222	436	16275.6	301087
18	68.98	314.72	258	573	21708.3	401587
19	54.98	277.99	229	349	15282.3	282711
20	68.98	270.7	235	310	18671.5	345408
21	48	283.93	223	452	13629.2	252130
22	46.43	477.13	225	433	12868.2	238053
23	66.81	300.73	251	424	20092.8	371702
24	65.68	289.14	253	461	18990.5	351310
25	87.95	290.07	238	381	25511.4	471942
26	63.03	285.05	244	366	17966.5	332367
27	70.81	334.42	235	601	23681.8	438096
28	103.95	289.01	240	501	30042.8	555769
29	127.63	280.62	227	372	35814.1	662534
30	23.03	311.03	257	461	7162.4	132499
31	111.36	306.32	241	444	34110.1	631012
32	14.38	313.27	256	403	4504.51	83330
33	143.63	297.93	245	579	42790.3	791588
34	86.87	357.14	259	672	31024.5	573930
35	94.98	383.89	238	912	36460.6	674494
36	107.09	317.68	253	490	34018.7	629321
37	68.38	321.87	262	612	22009.9	407166
38	78.76	268.27	229	317	21128.7	390865
39	176.66	289.1	245	442	51071	944775
40	67.08	266.1	231	310	17851.2	330234
41	68.65	347.45	268	653	23852.9	441260
42	66.16	295.74	246	375	19567.7	361987
43	68.06	287.77	244	377	19584.7	362303
44	68.33	293.94	253	346	20084	371538
45	70.22	292.63	246	352	20547.9	380121
46	103.79	402.02	253	1118	41724.7	771875
47	78.81	266.49	227	445	21003.5	388549
48	67.73	362.63	258	936	24561.9	454376
49	126.65	317.9	255	540	40262.9	744834
50	188.33	351.13	246	722	66128.2	1223323
51	53.57	280.27	239	477	15014	277747
52	64.71	330.4	263	633	21378.8	395492
53	69.89	305.79	258	415	21373.1	395386
54	153.14	327.36	255	633	50133.1	927425
55	70.87	277.85	234	343	19690.8	364264
56	60	281.66	218	523	16900.4	312644
57	69.79	297.05	243	480	20730.4	383496
58	65.08	323.44	257	566	21050.6	389421
59	106.6	284.44	231	507	30321.2	560920
60	72.87	338.8	267	615	24687.3	456697
61	72.6	308.95	254	479	22429.1	414921
62	62.11	284.01	246	329	17640.2	326330
63	97.36	473.39	257	894	46086.7	852569
64	73.41	286.82	250	347	21055	389501
65	25.24	298.72	245	386	7540.95	139502
66	98.65	332.09	264	733	32761.8	606069
67	66.38	271.82	229	323	18044	333801
68	61.03	303.17	243	422	18502.6	342284
69	62.71	274.38	233	424	17204.8	318275
70	88.17	326.9	253	511	28821.3	533173
71	73.95	289.7	234	420	21423.1	396311
72	81.08	297.31	241	482	24107	445961
73	87.95	305.59	250	410	26876.6	497197
74	78.65	299.67	259	611	23569.5	436019
75	68.33	288.15	241	442	19688.7	364226
76	67.19	294.5	241	430	19788.2	366066
77	70.11	285.82	239	365	20039	370706
78	114.82	391.62	246	575	44963.9	831798
79	193.74	299.47	229	572	58018.7	1073302
80	71.68	297.24	250	430	21305.6	394138
81	92.54	312.69	251	858	28937.7	535326
82	78.38	307.83	247	734	24128.3	446355
83	70.54	290.36	244	346	20483.3	378925
84	56.76	296.18	248	346	16810.8	310987
85	84	299.85	242	435	25188.5	465969
86	67.84	295.99	252	397	20080.1	371467
87	84.17	309.55	231	673	26053.3	481967
88	51.25	311.75	247	523	15975.9	295542
89	89.46	299.17	248	723	26765	495133
90	64.6	290.18	244	417	18744.9	346767
91	12.65	283.26	253	317	3583.06	66284
92	53.41	263.41	226	347	14068.3	260253
93	66.81	264.59	231	303	17678.1	327031
94	86.44	287.07	240	358	24813.5	459032
95	68.33	339.55	255	817	23200.7	429195
96	81.25	309.12	260	383	25115	464608
97	63.35	320.6	248	543	20311.3	375744
98	71.68	280.68	243	325	20118.8	372183
99	80.44	290.76	228	501	23387.2	432645
100	69.03	283.61	241	349	19577.4	362167
101	118.55	306.25	250	437	36305.1	671617
102	79.57	281.89	245	394	22430.2	414941
103	61.57	310.03	257	516	19088.8	353128
104	59.52	293.71	247	452	17480.6	323378
105	65.73	313.35	255	811	20597.5	381039
106	87.79	311.8	245	402	27371.9	506360
107	75.03	289.41	249	424	21714.5	401701
108	103.57	371.06	263	603	38430.9	710943
109	90.98	292.31	251	342	26593.8	491965
110	128.11	330.71	248	657	42368.6	783787
111	63.08	277.46	241	383	17503.1	323795
112	77.35	274.83	226	444	21259.6	393286
113	76.49	301.06	251	466	23027.8	425998
114	109.25	314.19	247	570	34324.6	634980
115	79.79	293.34	247	486	23404.5	432965
116	78.54	328.36	266	545	25790.9	477112
117	100.71	299.2	244	465	30131.2	557405
118	78.54	267.03	229	457	20973.2	387989
119	68.27	310.56	253	558	21202.6	392232
120	84.98	285.99	247	415	24302.7	449582
121	104.98	378.38	270	580	39721.8	734823
122	72.65	305.34	254	595	22183.5	410379
123	121.68	437.06	259	773	53181.3	983814
124	67.41	274.19	230	401	18482.8	341917
125	94.76	292.46	250	849	27713.3	512676
126	99.36	298.65	233	415	29672.5	548919
127	80.65	385.2	248	345	23002.1	425522
128	125.09	297.98	249	388	37272.7	689517
129	55.73	256.42	212	327	14291.1	264374
130	75.25	295.31	251	447	22221.2	411075
131	138.11	337.22	258	474	46574.1	861585
132	10.22	292.52	234	444	2988.55	55286
133	90.6	325.9	256	531	29526.4	546216
134	64.71	329.29	244	802	21306.7	394157
135	73.95	306.86	248	713	22691.7	419779
136	82.22	293.66	240	642	24144.6	446657
137	81.79	287.8	236	365	23538	435435
138	169.09	277.67	216	460	46951.2	868561
139	86	311.61	253	579	26799.2	495765
140	77.46	287.72	239	493	22287.9	412309
141	76.11	302.98	236	482	23060.1	426594
142	70.81	291.53	250	382	20644.6	381909
143	99.9	286.34	250	327	28603.8	529148
144	58.54	296.41	250	362	17352.6	321010
145	62.06	308.92	253	402	19170.8	354645
146	66.98	290.32	248	406	19444.1	359701
147	78.33	273.68	229	494	21436.4	396558
148	107.52	330.05	237	592	35486.4	656471
149	84.27	332.7	258	545	28037.5	518673
150	68.49	268.56	227	417	18393.7	340270
151	112.06	300.92	242	581	33720.6	623805
152	112.87	365.76	260	748	41282.8	763700
153	119.19	346.95	242	609	41354.2	765022
154	74.81	279.33	230	597	20898.1	386599
155	104.54	341.87	246	818	35741.1	661184
156	74.38	300.61	245	518	22359.6	413636
157	78.54	291.98	233	392	22933.5	424252
158	66.71	269.23	224	480	17959.1	332230
159	79.73	315.4	255	562	25147.5	465210
160	85.03	298.98	246	472	25422.8	470303
161	72.06	296.04	254	398	21331.5	394617
162	73.57	265.96	224	344	19566.5	361966
163	77.3	260.94	216	330	20170.7	373142
164	69.84	277.08	238	387	19351.5	357988
165	79.46	351.85	256	451	27958.8	517216
166	68.44	288.94	227	400	19773.5	365795
167	81.62	308.12	248	725	25149.9	465255
168	122.6	372.62	258	771	45682.4	845091
169	79.3	313.63	246	548	24871.4	460102
170	74.65	277.34	228	324	20704.2	383012
171	122.22	289.2	221	464	35346	653874
172	220.82	352.6	241	860	77861.9	1440387
173	49.62	286.04	240	409	14194.4	262586
174	43.14	279.51	239	345	12057.1	223048
175	146.76	242.38	198	380	35572.2	658059
176	60.92	567.07	267	976	34546.4	639083
177	51.19	567.01	290	1113	29025.9	536958
178	63.41	285.37	237	500	18094.5	334734
179	54.27	300.86	234	510	16328.4	302063
180	95.9	281.87	240	352	27029.8	500031
181	77.46	246.95	205	294	19129.5	353881
182	75.46	289.67	228	682	21859	404375
183	109.84	370.01	241	867	40642.2	751851
184	55.03	301.4	232	502	16586.1	306830
185	52.87	277.16	232	581	14652.7	271064
1	92.81	237.26	197	394	22021.4	407380
2	26.97	255.43	219	353	6889.9	127458
3	15.41	294.69	246	381	4540.08	83988
4	24.27	268.2	225	390	6509.45	120420
5	103.84	273.61	219	379	28412	525600
6	71.68	281.61	223	398	20185.1	373410
7	58.76	282.02	212	436	16571.3	306556
8	96.49	283.9	232	414	27393.7	506763
9	70.38	256.18	217	343	18030.4	333549
10	87.19	238.73	200	318	20815.3	385067
11	79.62	301.42	238	461	24000.5	443992
12	85.19	242.96	204	283	20698.2	382902
13	138.92	318.97	234	746	44312.7	819751
14	66.92	653.02	299	2434	43701	808436
15	72.11	861.85	297	2104	62148.8	1149706
16	73.57	319.97	236	579	23540.1	435474
17	103.79	267.53	227	329	27766.5	513659
18	79.08	276.53	233	357	21869.4	404568
19	79.84	276.15	230	362	22047.9	407869
20	79.08	278.56	234	455	22029.5	407529
21	170.12	292.13	237	688	49696.4	919347
22	100.54	270.43	214	389	27190.2	502998
23	204.49	368.78	257	643	75412.7	1395079
24	67.68	291.79	243	450	19747.7	365317
25	136.87	339.57	235	722	46477.4	859797
26	90.98	278.39	232	494	25327.3	468536
27	90.98	283.33	236	522	25776.4	476844
28	143.3	315.59	237	570	45225.3	836634
29	236.17	310.39	245	538	73305.8	1356103
30	115.84	264.25	221	333	30611.8	566295
31	65.03	304	243	379	19769.2	365716
32	142.55	349.49	248	594	49818.6	921606
33	108.82	302.9	251	480	32960.4	609743
34	87.52	282.24	233	515	24701.1	456952
35	77.52	352.24	248	1788	27304.1	505106
36	205.85	294.77	234	448	60676.3	1122466
37	96.76	344.09	251	1733	33294.5	615924
38	97.95	287.93	236	535	28202.4	521724
39	119.57	263.99	217	352	31565.4	583937
40	70.98	290.53	245	563	20620.8	381470
41	151.68	284.32	231	423	43126.6	797809
42	103.84	335.4	248	604	34829	644310
43	113.46	303.88	237	572	34479.4	637844
44	137.9	375.17	258	868	51735.3	957064
45	176.39	295.15	236	569	52059.9	963069
46	92.98	279.26	237	428	25964.3	480321
47	74.17	272.85	225	435	20236	374350
48	143.84	328.3	231	720	47223.4	873597
49	148.38	300.88	222	832	44646.6	825928
50	96.98	276.45	233	411	26809.2	495950
51	134.92	352.04	245	701	47498.4	878685
52	90.81	313.29	240	481	28451	526322
53	61.46	284.28	216	538	17472.2	323222
54	93.08	291.85	233	729	27166.5	502560
55	108	276.35	233	561	29846.7	552141
56	99.84	311.85	248	763	31135.4	575982
57	91.52	295.43	239	574	27037	500164
58	60.76	325.49	233	1048	19776.3	365846
59	72.92	321.4	247	602	23437.1	433569
60	100.81	301.24	239	676	30369.6	561815
61	70.87	302.84	247	496	21461.7	397026
62	86.54	321.97	245	868	27864.3	515469
63	94.6	288.33	233	577	27275.5	504576
64	149.25	527.26	255	1392	78693.3	1455767
65	135.79	383.47	229	643	52071.1	963277
66	62.71	268.86	222	538	16858.8	311875
67	137.84	607.58	258	1731	83751.3	1549336
68	148.06	335.37	234	560	49655.4	918587
69	82.06	307.53	222	706	25235.5	466838
70	135.41	342.92	239	590	46434.7	859007
71	90	303.2	241	396	27289.3	504831
72	134.01	757.62	262	2329	101525	1878128
73	144.82	484.89	250	938	70219.7	1299011
74	113.46	276.53	234	459	31376.3	580438
75	65.95	256.51	216	304	16916.6	312945
76	138.71	349.37	226	923	48460.8	896488
77	69.79	275.98	208	579	19259.5	356287
78	146.49	261.28	216	340	38275.2	708062
79	126.22	426.3	229	1228	53807.8	995403
80	131.41	411.94	240	1074	54133	1001419
81	26.54	339.34	205	1001	9006.53	166614
82	103.95	255.42	223	321	26551.2	491178
83	43.3	305	224	414	13206.4	244308
84	18.97	330.03	250	766	6261.98	115842

## Sheet: SCR Olaparib
	Area	Mean
1	62.71	346.76	237	1223	21743.5	402239
2	71.57	323.05	246	491	23120.9	427720
3	82.87	320.61	232	602	26568.7	491500
4	68.27	284.33	236	473	19411.8	359103
5	73.79	318.82	238	461	23524.6	435188
6	61.03	299.87	240	426	18301	338554
7	51.3	308.63	235	430	15832.8	292894
8	66.11	337.99	219	679	22345	413365
9	54.22	315.62	237	482	17112.4	316567
10	53.35	358.08	236	660	19104.6	353421
11	64.92	414.92	242	1444	26937.4	498321
12	67.84	314.23	227	727	21317.7	394361
13	69.25	299.65	241	587	20749.7	383854
14	62.38	299.62	235	532	18690.7	345764
15	50.98	310.62	238	480	15833.8	292913
16	68.71	297.6	244	474	20446.7	378249
17	78.87	301.88	247	650	23808.3	440436
18	59.08	339.78	254	780	20075.5	371381
19	57.68	361.13	265	820	20829.2	385325
20	63.08	343.42	244	523	21664.1	400770
21	71.3	275.47	235	428	19640.8	363341
22	70.33	306.29	241	482	21540.3	398479
23	63.08	265.99	229	310	16779.4	310407
24	56.38	410.28	286	771	23132	427925
25	103.52	506.91	248	1349	52474.1	970732
26	69.89	293.21	237	459	20493.6	379116
27	55.89	367.99	252	910	20568.7	380506
28	54.87	331.53	235	521	18190	336502
29	86.38	295.33	236	403	25510.9	471933
30	81.25	305.8	259	539	24845.5	459624
31	65.68	316.23	253	681	20769.7	384224
32	67.08	298.85	238	514	20048.2	370877
33	74.71	288.42	240	445	21546.5	398594
34	64.87	299.64	251	499	19436.9	359568
35	61.03	291.51	240	402	17790.8	329116
36	58.43	364.71	253	923	21312	394255
37	82.27	336.03	249	619	27646.6	511441
38	70.71	288.17	223	815	20374.9	376920
39	104.27	427.87	249	967	44615.6	825355
40	65.95	305.68	254	482	20159.1	372928
41	97.25	386.92	262	998	37626.8	696068
42	82.38	390.46	259	918	32167.1	595067
43	53.03	330.05	251	715	17502.1	323776
44	54.54	334.78	252	651	18259.7	337791
45	65.73	360.9	256	799	23723	438858
46	70.65	315.35	248	771	22280.2	412167
47	57.03	404.06	278	785	23043.4	426286
48	82.71	308.13	229	622	25484.1	471436
49	67.52	289.91	232	636	19573.8	362101
50	30.81	240.69	294	1042	16659.8	308194
2	128.98	349.88	253	795	45127.5	834825
3	125.46	441.32	262	944	55370.4	1024311
4	126.92	337.6	244	663	42849	792675
5	148.22	381.27	239	858	56512.8	1045444
6	117.84	447.24	259	902	52703.9	974982
7	187.2	372.93	261	884	69810.6	1291444
8	145.52	441.15	247	1181	64195.5	1187569
9	136.71	341.49	252	1086	46684.5	863628
10	151.3	355.01	250	714	53713.8	993665
11	113.09	351.95	259	756	39800.1	736271
12	134.17	348.18	251	679	46714.5	864183
13	134.49	361.49	245	669	48618.1	899398
14	159.68	330.19	235	667	52725.1	975374
15	126.87	395.32	250	1122	50153.9	927809
16	155.14	297.53	240	541	46158.7	853901
17	149.63	311.26	243	634	46573	861566
18	88.54	403.08	237	931	35690.1	660240
19	78.92	318.8	248	769	25160	465441
20	114.76	448.79	256	1099	51503.3	952773
21	103.03	277.14	223	474	28554.4	528235
22	96.44	352.59	243	661	34002.6	629023
23	101.63	365.44	239	736	37138.1	687026
24	120.33	346.37	250	645	41678.9	771028
25	83.9	259.45	212	401	21766.4	402662
26	162.38	305.99	219	794	49688.2	919194
27	104.76	296.37	225	509	31048	574364
1	181.95	336.97	211	965	61313.1	1134246
2	31.14	346.52	268	738	10789.3	199594
3	146.44	322.08	240	627	47164.6	872509
4	58.06	329.71	264	538	19141.7	354107
5	102.33	298.53	231	505	30547.7	565109
6	65.08	348.48	249	573	22680.7	419575
7	140.76	336.24	226	803	47329.4	875558
8	216.33	301.42	220	642	65206.4	1206269
9	79.84	279.63	230	588	22325.9	413012
10	50.27	278.91	232	446	14021.2	259382
11	112.33	350.13	240	922	39329.7	727570
12	61.57	340.74	256	472	20979.7	388108
13	168.49	308.18	231	570	51926.8	960606
14	263.69	293.52	219	580	77397.4	1431793
15	110.27	338.04	229	644	37277.7	689610
16	87.63	303.84	232	624	26624.4	492531
17	69.14	294.41	241	380	20354.6	376545
18	70.87	295.81	237	376	20963.5	387810
19	121.79	336.19	232	739	40944.7	757446
20	111.09	403.28	244	793	44798.6	828741
21	66.6	299.83	236	666	19967.9	369391
22	78.76	356.02	251	626	28040	518719
23	128.92	335.06	242	618	43196.9	799110
24	129.3	402.45	247	965	52038.1	962666
25	122.11	345.8	240	708	42226.9	781166
26	67.3	497.6	272	1903	33488.4	619510
27	136.6	334.33	241	570	45669.9	844859
28	28.27	312.84	253	502	8844.36	163614
29	59.52	383.64	271	757	22833	422393
30	161.79	350.02	241	674	56629.5	1047603
31	110.55	324.54	241	668	35876.2	663683
32	178.82	314.38	239	480	56217	1039973
33	81.84	590.18	273	1772	48301.2	893535
34	71.41	311.54	252	451	22246.7	411547
35	64	358.08	235	1639	22918.1	423967
36	137.03	355.55	243	628	48722.6	901331
37	132.33	345.62	259	575	45736.2	846086
38	73.03	271.8	233	320	19849.5	367201
39	62.92	310.47	239	869	19535.2	361386
40	82	286.14	234	747	23464.1	434068
41	128.22	345.73	252	703	44330	820072
42	182.17	309.74	226	677	56424.6	1043812
43	148.76	322.97	239	578	48046.2	888819
44	103.25	377.15	238	900	38939.6	720353
45	50.06	298.69	232	520	14951.3	276587
46	75.79	325.56	242	786	24673.4	456440
47	89.52	329.72	256	574	29515.6	546016
48	118.28	335.67	227	570	39701	734439
49	76.49	319.54	260	505	24441.4	452148
50	140.33	378.99	259	763	53183.1	983847
51	85.35	308.36	250	459	26319.7	486894
52	259.36	352.25	239	699	91360.9	1690109
53	142.11	324.77	231	707	46155	853833
54	68.44	261.8	227	308	17916.4	331440
55	117.41	379.12	252	702	44512.9	823455
56	59.68	296.94	237	576	17720.9	327824
57	61.03	304.64	233	496	18592.3	343943
58	75.3	285.36	235	356	21487.4	397500
59	61.89	295.79	234	517	18307.5	338675
60	82.98	315.16	246	525	26151.1	483776
61	135.03	385.71	258	801	52083.1	963499
62	128.44	371.62	260	978	47730.5	882979
63	69.08	295.8	251	359	20434.9	378030
64	68.65	288.82	228	469	19828.2	366806
65	71.84	356.82	252	1167	25634	474210
66	80.54	301.35	251	422	24272.1	449015
67	152.22	312.56	234	578	47578.4	880165
68	126.87	337.36	239	748	42800.9	791784
69	72.22	281.33	233	465	20317.7	375862
70	145.63	395.96	267	839	57663.2	1066725
71	69.35	275.86	228	408	19132.2	353932
72	205.41	323.01	231	1176	66350.2	1227429
73	81.03	309.6	259	441	25087	464091
74	76.06	325.21	259	772	24734.8	457576
75	78.87	300.44	240	500	23695.3	438346
76	82.71	283.32	238	341	23431.9	433473
77	88.71	333.69	265	615	29600.8	547593
78	106.17	294.04	241	468	31217.7	577504
79	68.6	272.79	227	433	18712.5	346167
80	84.06	288.85	234	599	24280.1	449164
81	83.41	300.82	248	464	25091	464165
82	93.41	416.57	250	1149	38911.2	719828
83	74.76	275.83	234	321	20620.8	381469
84	74	269.21	219	711	19922.3	368547
85	80.33	342.34	266	604	27499.3	508717
86	76.92	293.97	242	607	22612.8	418319
87	74.27	274.39	237	323	20379.9	377013
88	62.27	268.26	220	324	16705.4	309037
89	69.68	283.91	231	625	19782.3	365958
90	71.89	323.87	246	703	23284.4	430744
91	31.57	305.19	241	383	9634.5	178231
92	109.57	323.59	224	686	35456.8	655924
93	103.46	296.85	245	446	30713.6	568179
94	91.73	301.79	235	676	27684.5	512143
95	83.57	293.92	246	552	24563.3	454403
96	33.41	319.44	243	492	10671.5	197414
97	142.44	354.05	255	576	50430.6	932928
98	133.14	258.63	213	317	34434.4	637010
99	137.47	339.26	255	796	46636.5	862740
100	90.17	277.37	237	349	25009.7	462661
101	117.36	437.32	254	1233	51322.2	949423
102	141.84	364.68	248	959	51726.9	956908
103	165.63	311.21	247	665	51544.5	953535
104	82.71	299.59	232	633	24777.7	458369
105	258.88	275.25	207	606	71256.4	1318189
106	155.14	319.26	247	446	49530.4	916275
107	72.71	298.31	244	423	21688.8	401227
108	166.22	459.07	290	957	76307.8	1411636
109	132.71	393.21	250	1000	52181.6	965320
110	64	348.6	251	578	22311.5	412745
111	171.47	346.82	248	744	59467.4	1100103
112	75.25	275.75	228	375	20749.1	383842
113	63.52	345.67	233	706	21955.4	406158
114	151.84	340.01	247	750	51628.8	955093
115	129.9	314.93	233	779	40908.6	756779
116	180.93	264.88	228	325	47923.2	886543
117	83.14	266.56	225	336	22161.5	409971
118	149.79	331.88	241	571	49712.9	919652
119	66.16	277.3	234	383	18347.6	339417
120	130.87	332.7	235	619	43540.7	805471
121	70.49	273.74	236	315	19295.5	356953
122	149.36	330.07	237	539	49298.5	911985
123	66.54	293.39	228	613	19522.8	361158
124	70.98	309.56	232	558	21971.2	406450
125	94.98	311.11	249	538	29547.8	546613
126	79.08	293.84	232	652	23238.1	429888
127	131.41	434.96	274	1099	57158.5	1057389
128	136.28	343.18	253	785	46767.5	865164
129	80.11	486.89	238	748	39005.8	721577
130	101.19	337.99	232	711	34202.3	632717
131	297.09	311.22	234	1027	92462.6	1710488
132	86.33	410.9	235	1114	35472.5	656215
133	26.27	324.48	235	662	8524.45	157696
134	57.84	494.2	292	1913	28584.5	528791
135	116.11	399.37	256	745	46371.8	857844
136	101.57	343.64	262	585	34904.3	645704
137	108.38	309.89	239	859	33586.3	621321
138	158.49	275.73	232	344	43701.5	808445
139	15.24	426.63	282	610	6503.51	120310
140	72.92	309.18	246	456	22545.9	417082
141	92.71	294.93	249	587	27341.9	505804
142	131.46	545.91	269	1188	71768.1	1327655
143	96.33	283.03	215	496	27263.6	504356
144	237.25	359.62	233	944	85321.1	1578376
145	129.3	497.13	254	983	64280.2	1189136
146	97.84	362.58	243	804	35475.6	656271
147	97.9	394.82	241	789	38650.9	715012
148	128.17	396.89	253	982	50868	941020
149	165.14	368.79	239	1042	60903.1	1126662
150	80.27	291.45	238	686	23396	432808
151	108.92	353.48	215	912	38502.5	712267
152	131.95	318.38	252	523	42010.3	777159
153	108.06	341.1	255	625	36858.7	681859
154	103.41	312.68	237	575	32334.6	598166
155	84.17	322.58	252	508	27150.1	502256
156	85.79	264.86	223	421	22721.6	420332
157	147.57	440.22	247	1197	64965.1	1201806
158	74.17	277.54	229	421	20583.7	380782
159	64.65	275.62	215	555	17819.4	329646
160	75.03	334.24	256	747	25078.3	463929
161	145.95	371.64	241	912	54241.1	1003419
162	81.3	300.23	247	490	24409	451548
163	148.28	463.05	259	1080	68658.8	1270137
164	92.38	300.49	231	801	27759.5	513529
165	133.03	366.24	250	677	48721.6	901313
166	63.79	289.48	223	520	18465.1	341590
167	126.6	351.12	238	895	44451.9	822327
168	84.22	276.26	222	345	23266.3	430409
169	140.11	584.28	263	2094	81865.8	1514455
170	297.36	375.17	239	2033	111562	2063817
171	110.76	397.06	237	813	43979.3	813585
172	260.28	297.28	236	553	77376.1	1431399
173	106.82	393.23	239	1085	42003.4	777031
174	102.76	266.31	218	497	27366.5	506260
175	140.82	327.58	235	686	46128.3	853339
176	98.22	321.32	214	860	31560.4	583844
177	115.57	269.47	227	364	31143.3	576128
178	62.92	269.52	218	379	16958.6	313722
179	105.84	496.39	251	1085	52538.6	971924
180	125.84	354.53	232	731	44615.1	825345
181	178.87	397.5	227	1072	71101.2	1315318
182	149.9	478.36	249	3025	71704.8	1326484
183	130.22	566.02	302	967	73707.9	1363541
184	18.92	440.78	249	757	8339.47	154274
185	98.22	395.82	256	1313	38877.9	719212
186	137.36	398.64	235	1877	54756	1012945
187	79.25	424.16	266	919	33613.3	621821
188	46.97	242.7	210	285	11400.9	210908
189	65.62	439.85	256	905	28865	533981
190	28.22	308.11	249	431	8694.19	160836

[truncated: 2 more sheets: scr Fasudil, SCR NT]
