# Supplementary material for: Inhibitors of Rho kinases (ROCK) induce multiple mitotic defects and synthetic lethality in BRCA2-deficient cells
Source: eLife journal article supplement (doi:10.7554/elife.80254), 2023-04-19
Supplement: supp [file Figure 3- source data 4.xlsx]

## Sheet: PEO4 NT 
yH2AX intensity/cell in PEO1 or PEO4 cells
	Area	Mean		Min	Max
1	47299	433090	433.09	284	1976
2	33947	341790	341.79	289	431
3	60273	624790	624.79	412	1643
4	152006	494639	494.639	276	1420
5	118978	311213	311.213	262	403
6	50056	926096	926.096	399	2728
7	93896	327710	327.71	271	447
8	36920	306476	306.476	260	542
9	67030	382090	382.09	304	690
10	36272	371142	371.142	288	672
11	167899	335773	335.773	256	618
12	69949	379094	379.094	309	562
13	41245	471166	471.166	335	1628
14	69462	348215	348.215	270	1065
15	118870	357941	357.941	305	563
16	18812	350098	350.098	307	401
17	87895	360729	360.729	308	503
18	50434	386599	386.599	276	989
19	68165	399036	399.036	299	521
20	83787	404434	404.434	318	626
21	5730	358396	358.396	315	390
22	52489	893560	893.56	361	4095
23	17190	339242	339.242	295	372
24	92004	424832	424.832	276	704
25	101950	491095	491.095	342	891
26	63084	491238	491.238	306	1107
27	108545	1817003	1817	491	4095
28	87463	375988	375.988	309	566
29	48921	438250	438.25	336	729
30	35839	432837	432.837	312	1008
31	37731	503232	503.232	339	1206
32	27839	536375	536.375	313	1428
33	69300	571764	571.764	328	1446
34	51029	599382	599.382	331	1680
35	32163	584857	584.857	371	1441
36	42218	388414	388.414	327	528
37	18974	597795	597.795	405	1124
38	32758	385314	385.314	334	486
39	107410	456143	456.143	342	1556
40	30758	531230	531.23	381	1049
41	40867	502578	502.578	356	875
42	45678	380807	380.807	325	775
43	113680	676437	676.437	340	3169
44	43353	453919	453.919	338	804
45	78111	395338	395.338	319	746
46	43029	522629	522.629	386	908
47	32974	461849	461.849	351	736
48	77300	298928	298.928	217	584
49	101896	271646	271.646	171	486
50	97734	536116	536.116	399	873
51	79084	576744	576.744	403	987
52	81463	403350	403.35	240	784
53	95031	262642	262.642	219	424
54	210009	592826	592.826	341	1616
55	84003	204620	204.62	154	342
56	113194	314939	314.939	189	555
57	80111	659555	659.555	391	1859
58	78760	668014	668.014	373	1791
59	68868	257206	257.206	209	344
60	67570	1776656	1776.66	500	3158
61	71787	190671	190.671	157	228
62	95517	445917	445.917	333	1040
63	17460	604830	604.83	384	1496
64	45083	393380	393.38	319	549
65	87950	434801	434.801	335	1230
66	70976	554791	554.791	377	1466
67	92706	248641	248.641	207	318
68	34812	387107	387.107	326	578
69	77409	218079	218.079	160	323
70	72598	274788	274.788	203	408
71	55678	252199	252.199	201	341
1	17136	398290	398.29	294	706
2	92544	363048	363.048	285	557
3	11082	330927	330.927	303	376
4	28974	524491	524.491	336	1161
5	17460	346328	346.328	314	378
6	46651	390472	390.472	318	602
7	39894	311077	311.077	273	359
8	72868	441292	441.292	318	1117
9	103301	323546	323.546	273	433
10	48488	364973	364.973	313	489
11	145519	366337	366.337	291	1303
12	96923	360080	360.08	286	537
13	104491	280086	280.086	235	363
14	146546	362767	362.767	262	552
15	44002	354765	354.765	306	502
16	56705	364242	364.242	308	465
17	137843	451142	451.142	312	1166
18	58056	365104	365.104	309	446
19	72057	347386	347.386	282	592
20	95626	328709	328.709	272	465
21	101247	442926	442.926	338	1296
22	104491	435864	435.864	310	1368
23	94004	429026	429.026	332	582
24	98490	528304	528.304	341	2065
25	98707	675228	675.228	368	1597
26	157682	450612	450.612	336	1218
27	127465	479490	479.49	336	1504
28	44813	655329	655.329	374	1442
29	85139	682630	682.63	417	1436
30	84760	438582	438.582	328	1262
31	49029	571798	571.798	371	1154
32	45515	567005	567.005	359	1446
33	37515	614424	614.424	365	1504
34	111356	399636	399.636	307	2034
35	27947	612143	612.143	375	1141
36	118329	380037	380.037	309	930
37	47732	481683	481.683	356	1579
38	25515	644167	644.167	385	1205
39	44650	517121	517.121	348	1282
40	115788	403779	403.779	309	1342
41	94274	489843	489.843	317	2042
42	89571	429404	429.404	310	1395
43	76706	473135	473.135	321	1217
44	43515	493383	493.383	341	1972
45	85247	539129	539.129	320	2121
46	68543	511696	511.696	316	1441
47	38164	650677	650.677	362	2183
48	80976	518266	518.266	370	1135
49	63192	474146	474.146	324	1307
50	47678	451952	451.952	336	798
51	73354	334797	334.797	288	428
52	105518	504605	504.605	346	2053
53	107085	434777	434.777	311	1151
54	54489	540900	540.9	337	1909
55	122816	638060	638.06	360	2620
56	70489	453693	453.693	314	997
1	115140	391725	391.725	294	825
2	65192	300287	300.287	259	342
3	37785	379300	379.3	299	579
4	115518	393986	393.986	299	818
5	92220	382668	382.668	294	897
6	91896	291802	291.802	249	331
7	79895	724028	724.028	394	1583
8	138816	401514	401.514	306	1436
9	101301	441302	441.302	314	790
10	97842	379675	379.675	275	689
11	145844	365886	365.886	284	802
12	53408	371563	371.563	298	665
13	58435	357161	357.161	287	576
14	70165	853753	853.753	439	1986
15	131249	372202	372.202	291	995
16	46110	470589	470.589	326	2264
17	51353	524891	524.891	325	2649
18	227361	257137	257.137	190	851
19	54164	420713	420.713	323	1757
20	53408	550313	550.313	506	4095
21	54543	454307	454.307	324	1768
22	70327	521947	521.947	349	1243
23	44705	452814	452.814	308	2091
24	48543	374234	374.234	311	502
25	98653	407089	407.089	312	827
26	72219	450839	450.839	330	1386
27	86436	388577	388.577	300	1670
28	37245	393284	393.284	322	695
29	17839	381148	381.148	320	515
30	112113	474671	474.671	322	1092
31	65462	396680	396.68	312	649
32	116545	360206	360.206	300	867
33	90004	400291	400.291	319	914
34	93247	439885	439.885	301	1124
35	162655	405644	405.644	306	1015
36	64057	375461	375.461	307	711
37	106275	385300	385.3	312	948
38	72814	439782	439.782	313	1136
39	139519	423944	423.944	313	997
40	77679	466687	466.687	314	1096
41	67462	485740	485.74	334	878
42	60489	404683	404.683	336	495
43	55083	437289	437.289	324	764
44	75733	499218	499.218	323	1949
45	66003	602613	602.613	351	1288
46	72868	634062	634.062	364	1701
47	54272	401528	401.528	315	753
48	86814	504252	504.252	338	1780
49	73949	301884	301.884	231	493
50	50272	421477	421.477	313	925
51	97247	482024	482.024	305	1541
52	98382	279988	279.988	205	684
53	52867	375101	375.101	312	543
54	89409	517950	517.95	345	1259
55	93085	458462	458.462	320	1277
56	68651	738154	738.154	343	2420
57	64543	476815	476.815	333	924
58	61030	386080	386.08	323	664
59	57246	537229	537.229	337	1279
60	65570	682205	682.205	383	1784
61	64543	483461	483.461	329	852
62	73408	654448	654.448	357	1426
63	63786	294323	294.323	233	384
64	57408	359728	359.728	318	427
65	123194	634532	634.532	348	1596
66	278714	526421	526.421	352	4095
67	116059	383664	383.664	271	1876
68	91625	380800	380.8	217	1068
69	66814	453241	453.241	318	1044
70	60273	363913	363.913	301	892

## Sheet: PEO4 Fasudil 
	area	mean		min	max
1	137789	227940	227.94	172	275
2	120437	283513	283.513	201	620
3	97409	369021	369.021	303	830
4	67192	336340	336.34	205	833
5	108599	350532	350.532	290	551
6	164493	342297	342.297	285	606
7	62057	357779	357.779	311	423
8	99680	377025	377.025	315	651
9	100599	377251	377.251	315	890
10	202062	398898	398.898	322	2017
11	177088	442167	442.167	307	1313
12	135627	365725	365.725	311	840
13	145898	393718	393.718	315	1219
14	138600	429709	429.709	313	1240
15	106383	345370	345.37	231	827
16	165520	466545	466.545	308	1287
17	46759	360511	360.511	285	689
18	190062	522204	522.204	312	895
19	175629	604352	604.352	344	1590
20	52813	463456	463.456	293	1816
21	80219	413683	413.683	250	1067
1	131951	402730	402.73	292	859
2	118491	325064	325.064	281	473
3	124383	367061	367.061	280	780
4	33731	317247	317.247	272	411
5	124167	409272	409.272	291	997
6	134870	423375	423.375	306	1313
7	132762	376285	376.285	285	961
8	116167	356152	356.152	289	901
9	98004	318338	318.338	279	456
10	96977	367191	367.191	286	854
11	123302	360858	360.858	289	1056
12	97085	320306	320.306	266	549
13	117572	322774	322.774	278	394
14	147195	387606	387.606	286	1068
15	166980	362628	362.628	264	936
1	175358	424861	424.861	287	2968
2	202981	3354176	3354.18	1301	4095
3	132330	1817203	1817.2	359	4095
4	88868	312307	312.307	256	398
5	117302	288576	288.576	232	355
6	10487	516490	516.49	343	1016
7	144817	968222	968.222	332	2043
8	79246	317692	317.692	258	470
9	109302	337746	337.746	286	470
10	86436	332869	332.869	270	486
11	110545	354689	354.689	299	432
12	63354	398654	398.654	298	645
13	102058	327756	327.756	275	411
14	61786	369016	369.016	281	709
15	112383	372043	372.043	267	877
16	101842	351197	351.197	285	601
17	71625	367204	367.204	271	1023
18	139465	372349	372.349	230	1424
19	73516	304169	304.169	267	381
20	103518	310627	310.627	270	352
21	106707	483305	483.305	284	1029
22	20001	1104851	1104.85	991	1202
23	102491	596918	596.918	237	1725
24	96274	325227	325.227	285	443
25	96220	347612	347.612	284	502
26	71949	334145	334.145	274	460
27	133465	392445	392.445	302	986
28	124762	300666	300.666	226	611
29	87787	313427	313.427	265	480
30	84490	338081	338.081	269	632
31	97788	331605	331.605	287	399
32	122005	293238	293.238	229	811
33	151412	343833	343.833	293	592
34	188170	496441	496.441	290	2962
35	157142	491740	491.74	320	1365
36	222820	211579	211.579	169	356
37	77733	442099	442.099	298	1714
38	135573	447825	447.825	304	1565
39	105302	397257	397.257	279	844
40	154493	427537	427.537	281	1011
41	110761	667843	667.843	334	2827
42	148709	315442	315.442	210	473
43	65895	479301	479.301	311	1412
44	108545	387165	387.165	304	792
45	126546	423633	423.633	296	1109
46	98166	424474	424.474	304	955
47	131951	368537	368.537	239	782
48	88274	426377	426.377	293	1949
49	101301	222405	222.405	182	446
50	68760	571255	571.255	335	1759
51	107302	558311	558.311	333	1690
52	135897	508932	508.932	319	1446
53	95409	325418	325.418	277	412
54	144060	375713	375.713	300	846
55	143249	511366	511.366	312	1328
56	102058	358646	358.646	298	594
57	147574	355468	355.468	273	1334
58	114275	342848	342.848	281	468
59	107302	299063	299.063	265	344
60	84598	447286	447.286	307	1023
61	164331	465510	465.51	287	1180
62	112599	363158	363.158	299	780
63	212928	399427	399.427	302	873
64	163953	528642	528.642	321	1733
65	154601	386607	386.607	297	1119
66	100004	441972	441.972	321	838
67	132438	352964	352.964	278	882
68	128708	432270	432.27	283	1170
69	159898	369947	369.947	273	1027
70	134276	446338	446.338	306	1254
71	143033	321528	321.528	262	513
1	116437	361285	361.285	280	908
2	106977	359090	359.09	291	1013
3	132168	280648	280.648	220	504
4	110167	238261	238.261	203	293
5	150817	353228	353.228	290	875
6	122167	333634	333.634	270	656
7	22109	1329888	1329.89	819	1887
8	90220	269632	269.632	232	358
9	87950	261657	261.657	219	326
10	221036	215864	215.864	172	300
11	149628	441512	441.512	289	1999
12	132059	366004	366.004	292	1040
13	85409	292466	292.466	226	898
14	152114	402748	402.748	312	1618
15	137735	468759	468.759	324	1330
16	90544	289042	289.042	240	365
17	70165	322227	322.227	264	723
18	84922	478248	478.248	272	1610
19	127140	350628	350.628	292	577
20	142276	388106	388.106	299	1040
21	114978	274283	274.283	214	742
22	117572	389952	389.952	314	836
23	172926	395560	395.56	298	901
24	64867	374420	374.42	288	1178
25	41137	447661	447.661	319	1354
26	78706	354938	354.938	280	504
27	106166	424024	424.024	304	1553
28	191792	373538	373.538	280	1292
29	125681	341022	341.022	295	489
30	134492	492617	492.617	329	1693
31	71949	645961	645.961	318	2976
32	71841	476258	476.258	340	1537
33	105518	272820	272.82	208	636
34	124492	404388	404.388	295	1253
35	66651	336472	336.472	271	1092
36	86706	291292	291.292	241	345
37	97247	393143	393.143	318	634
38	82274	359085	359.085	300	569
39	106275	336307	336.307	293	386
40	137087	215482	215.482	175	387
41	115248	565269	565.269	305	2238
42	58921	439769	439.769	339	742
43	91733	390303	390.303	304	1162
44	112275	306240	306.24	231	637
45	58759	391879	391.879	298	614
46	78165	344323	344.323	296	393
47	103193	309466	309.466	252	469
48	36272	409924	409.924	321	537
49	92112	382117	382.117	307	750
50	56273	432734	432.734	316	724
51	74219	364917	364.917	302	580
52	73571	356337	356.337	307	504
53	66489	488802	488.802	337	1326
54	40867	438775	438.775	354	1481
55	71408	352544	352.544	308	471
56	53840	510021	510.021	340	1298
57	71084	408431	408.431	322	843
58	139087	271698	271.698	196	599
59	40650	361658	361.658	316	427
60	73138	654301	654.301	329	2639
61	96923	339699	339.699	298	380
62	78922	359142	359.142	315	500
63	62759	377246	377.246	312	610
64	70057	393667	393.667	312	699
65	86166	517492	517.492	319	743
66	61570	428808	428.808	301	1894
67	36974	368592	368.592	329	426
68	63570	371247	371.247	319	456
69	64759	404997	404.997	334	555
70	107518	337401	337.401	296	387
71	106653	332618	332.618	293	374
72	66165	409216	409.216	305	716
73	71462	400207	400.207	320	1012
74	44921	324468	324.468	284	412
75	194548	936188	936.188	356	4095
76	59029	356157	356.157	305	427
77	87517	338186	338.186	291	383
78	90112	475600	475.6	323	1650
79	57894	340707	340.707	299	409
80	84706	476909	476.909	310	1267
81	220604	417931	417.931	309	1044
82	90112	365230	365.23	287	744
83	150439	427074	427.074	306	1468
84	76814	341429	341.429	296	412
85	66759	604620	604.62	350	1936
86	70327	436700	436.7	298	1250
87	69516	341576	341.576	294	404
88	114383	356183	356.183	279	727
89	127032	346819	346.819	264	684
90	122383	328028	328.028	281	380
91	154168	355493	355.493	289	961
92	86868	352823	352.823	293	555
93	102761	371225	371.225	299	864
94	138600	361419	361.419	276	1002
95	134762	378024	378.024	305	903

## Sheet: PEO1 CDDP 1+2
	Area	Mean
1	64.273	2043.62
2	158.223	1365.02
3	138.979	1731.29
4	214.657	479.399
5	92.761	574.55
6	127.627	1605.05
7	196.278	1785.72
8	118.329	592.09
9	166.223	408.53
10	210.441	1644.47
11	177.034	1335.53
12	124.275	2112.8
13	139.627	930.861
14	126.221	442.51
15	227.523	1762.7
16	151.898	1159.76
17	145.952	754.128
18	98.545	2093.26
19	121.735	2435.85
20	113.572	1230.55
21	191.251	1077.63
22	248.443	1428.37
23	168.872	1611.67
24	83.084	880.82
25	152.385	1922.11
26	176.277	571.859
27	79.084	2163.55
28	85.787	760.059
29	188.71	1343.28
30	198.062	1133.07
31	337.311	839.087
32	126.221	1638.9
33	262.497	598.687
34	93.085	893.713
35	102.599	1629.29
36	80.706	1545.61
37	213.09	958.069
38	116.87	1026.35
39	163.25	943.834
40	61.084	1450.13
41	168.547	980.919
42	90.977	3271.53
43	197.846	969.282
44	112.815	3280.58
45	149.195	1115.62
46	225.685	1196.63
47	121.518	503.954
48	211.036	2076.59
49	182.17	1553.84
50	181.142	701.927
51	203.9	1168.46
52	182.818	577.045
53	102.545	479.086
54	194.008	1535.56
55	62.705	2125.05
56	182.872	1771.4
57	123.681	522.46
58	179.683	2730.96
59	108.491	1917.4
60	177.629	1317.23
61	174.98	2149.58
62	172.656	2180.08
63	150.817	704.934
64	157.79	902.45
65	82.111	1382.25
1	106.761	1446.84
2	74.706	881.773
3	70.057	379.936
4	181.251	831.77
5	241.253	1371.46
6	64.759	2778.56
7	148.763	1506.02
8	320.067	1411.63
9	170.331	1134.24
10	224.982	1327.35
11	147.303	524.397
12	136.6	527.664
13	109.572	2114.25
14	199.9	964.482
15	113.518	418.818
16	203.576	1432.15
17	208.441	663.652
18	149.79	1194.21
19	88.544	1098.92
20	151.412	907.879
21	475.317	875.863
22	251.74	788.724
23	101.247	1641.4
24	270.66	882.512
25	219.576	1448.57
26	173.845	956.405
27	128.654	1777.9
28	101.464	1616.33
29	128.762	1128.93
30	86.382	475.301
31	234.928	1016.41
32	144.168	460.459
33	131.086	1425.67
34	173.034	2483.05
35	140.6	451.781
36	171.737	1492.88
37	164.439	1223.42
38	66.976	403.295
39	346.663	712.521
40	139.898	446.085
41	111.572	1628.66
42	55.84	446.744
43	146.546	1129.51
44	159.358	493.874
45	224.766	1074.62
46	225.198	1531.81
47	121.951	2471.41
48	235.793	1155.34
49	124.005	1834.85
50	94.058	3895.4
51	115.951	1458.57
52	91.193	2245.24
53	163.574	1539.71
54	136.762	464.606
55	222.712	741.906
56	195.954	1326.11
57	209.468	1383.74
58	205.089	582.484
59	106.869	2045.6
60	181.197	549.04
61	182.17	830.214
62	90.49	3322.21
63	84.112	2257.14
64	174.656	1986.83
65	181.305	1302.22
66	126.113	1301.92
67	167.142	535.372
68	120.167	832.979
69	93.734	1313.96
2	107.68	995.584
3	118.221	922.49
4	161.304	863.065
5	188.656	671.279
6	156.223	1199.47
7	95.68	737.726
8	171.358	976.82
9	138.925	600.596
10	67.787	709.955
11	67.03	384.976
12	71.787	729.423
13	176.602	1600.12
14	110.275	1492.79
15	273.038	2003
16	166.493	919.797
17	113.194	722.979
18	201.9	993.615
19	128.546	543.168
20	152.493	867.59
21	57.083	2975.28
22	120.383	2084.05
23	62.057	462.868
24	150.547	1388.3
25	87.95	1471.25
26	144.492	956.832
27	165.574	1900.79
28	222.55	1059.24
29	115.897	2342.18
30	201.792	1536.73
31	128.924	1661.78
32	117.086	1400.54
33	113.41	1899.28
34	270.768	771.116
35	190.602	587.824
36	118.924	1392.61
37	156.871	1424.24
38	73.571	1299.19
39	187.305	1647.95
40	74.706	433.915
41	117.464	904.531
42	206.549	685.523
43	74.652	401.525
44	92.923	1565.59
45	159.682	600.496
46	85.625	454.115
47	152.222	1250
48	167.737	1098.8
49	160.601	1059.12
50	85.463	3087.26
51	136.924	647.138
52	103.518	377.98
53	155.141	2152.31
54	115.572	828.902
55	71.625	532.365
56	90.869	415.421
57	87.841	397.881
58	130.978	1396.64
59	123.194	810.031
60	184.44	950.428
61	100.437	395.376
62	180.007	1120.95
63	139.735	457.803
64	99.788	2075
65	185.143	1289.05
66	116.437	1268.63
67	138.762	612.647
68	179.359	2100.59
69	50.326	2107.45
70	98.112	1620.57
71	100.653	1605.59
1	136.276	1303.5
2	138.006	1330.34
3	127.627	1229.58
4	191.143	376.37
5	108.491	801.272
6	177.413	539.666
7	78.598	376.11
8	108.329	1271.56
9	69.57	407.214
10	111.95	368.14
11	166.926	895.07
12	140.276	1464.81
13	164.763	373.719
14	144.33	363.971
15	72.652	634.001
16	109.194	2058.72
17	83.301	372.695
18	107.68	751.337
19	153.898	413.33
20	145.682	545.172
21	83.409	416.766
22	264.443	2156.44
23	102.869	356.811
24	154.601	651.523
25	164.439	396.883
26	129.086	1043.07
27	152.925	782.461
28	110.815	408.042
29	155.195	699.464
30	108.221	409.799
31	139.627	400.861
32	76.057	1009.93
33	119.464	421.556
34	147.357	670.242
35	121.789	375.17
36	141.898	383.896
37	93.409	390.799
38	175.845	1022.54
39	251.902	520.468
40	104.599	387.998
41	194.116	588.135
42	145.736	676.231
43	190.008	1545.18
44	166.331	2265.11
45	83.625	555.705
46	119.951	1533.37
47	59.462	1308.45
48	185.197	1330.11
49	301.688	1577.37
50	69.949	406.641
51	153.195	1057.74
52	154.655	636.393
53	122.924	468.884
54	78.165	368.699
55	168.493	1791.14
56	66.922	398.62
57	236.064	3301.51
58	200.927	2986.76
59	67.03	388.339
60	187.251	1041.53
61	66.651	400.854
62	158.979	1214.14
63	156.169	2163.53
64	59.138	432.383
65	156.493	1268
66	68.003	434.665
67	110.869	1350.54
68	173.196	989.9
69	101.896	1560.22
70	131.735	513.474
71	120.383	1167.74
72	93.247	472.306
73	163.52	1811.31
74	152.979	2294.5
75	124.762	452.278
76	146.168	436.943
77	201.305	1288.27
78	120.167	2124.66
79	103.842	1178.59
80	136.006	431.995
81	150.168	1013.1
82	159.79	1316.62
83	221.036	1981.32
84	154.168	1001.8
85	168.061	1671.62
86	170.764	1007.68
87	82.328	2418.44
88	50.813	400.618
89	155.304	1307.02
90	214.117	1346.62
91	224.279	1831.78
92	175.629	1130.64
93	116.545	1591.69
94	219.522	618.355
95	160.439	1084.63
96	102.274	419.489
97	133.735	1948.48
98	121.897	386.991
99	221.793	1336.37
100	132.33	620.011
101	210.603	762.427
102	54.164	1591.2
103	63.354	3138.12
104	207.468	1256.17
105	183.251	1593.8
106	175.737	2274.66
107	144.925	2266.68
108	159.628	1135.94
109	137.087	396.065
110	54.381	711.024
111	146.492	1553.43
112	80.652	406.308
113	71.895	452.202
114	200.495	1190.89
115	141.844	1744.5
116	61.354	1511.75
117	184.926	371.579
118	50.705	392.939
119	120.113	557.526
120	50.759	392.58
121	100.599	750.53

## Sheet: PEO4 CDDP 1+2 
	Area	Mean
1	71.462	369.66
2	70.868	372.222
3	70.165	383.132
4	122.113	368.565
5	135.681	349.155
6	130.708	338.798
7	138.871	380.538
8	104.491	372.592
9	77.571	350.466
10	64.435	345.137
11	100.058	504.256
12	63.03	346.853
13	58.381	489.36
14	163.142	816.117
15	83.247	842.787
16	131.951	573.962
17	60.219	389.303
18	137.303	358.235
19	167.682	1051.69
20	59.192	843.433
21	101.572	391.446
22	50.434	725.158
23	117.302	674.918
24	99.355	536.911
25	138.438	464.678
26	200.549	740.151
27	173.088	1647.78
28	63.03	536.974
29	211.684	1419.08
30	145.357	436.488
31	186.386	365.282
32	100.382	489.794
33	51.083	475.949
34	151.249	382.48
35	71.787	631.859
36	114.978	401.283
37	140.006	381.41
38	110.437	383.642
39	178.332	841.695
40	203.522	797.722
41	108.329	423.944
42	56.543	352.911
43	77.625	408.203
44	165.682	1029.59
45	113.302	447.245
46	51.624	375.771
47	91.409	624.488
48	94.923	415.408
49	59.3	430.066
50	80.382	469.347
51	66.165	380.823
52	124.059	377.46
53	87.787	449.594
54	172.385	384.171
55	190.656	489.073
56	203.414	393.554
57	106.004	392.701
58	55.408	423.688
59	190.332	366.286
60	177.359	371.159
61	170.98	895.003
62	188.386	368.853
63	132.816	706.284
64	181.845	712.268
65	108.112	377.764
66	87.247	384.765
67	147.952	958.511
68	146.817	366.779
69	181.251	376.117
70	201.36	378.06
71	74.706	403.053
72	123.681	364.039
73	56.218	405.31
74	142.546	387.251
75	210.063	374.019
76	115.302	425.747
77	99.572	421.26
78	120.816	378.007
79	94.274	377.068
80	51.083	399.382
81	109.572	411.533
82	169.791	445.773
83	79.409	398.053
84	62.759	408.707
85	89.787	390.537
86	152.222	934.667
87	51.462	450.606
88	252.605	408.549
89	166.926	381.266
90	145.303	378.858
91	151.195	387.28
92	127.248	413.495
93	126.113	554.693
94	100.923	413.694
95	56.056	377.2
96	54.002	438.716
97	118.005	376.763
98	141.357	388.596
99	230.442	861.422
100	65.462	439.109
101	93.139	391.328
102	145.952	445.375
103	110.923	470.464
104	89.193	481.228
105	112.491	447.589
106	71.3	1223.83
107	112.761	1653.51
108	128.6	398.176
109	147.952	549.198
110	68.435	912.224
111	114.329	426.893
112	78.003	405.687
113	108.058	620.525
114	147.952	636.973
115	123.302	1523.12
116	102.599	392.091
117	73.625	398.024
118	82.328	597.554
119	183.089	407.452
120	71.949	413.625
121	93.139	385.69
122	97.355	377.217
123	60.435	470.667
1	96.166	367.602
2	76.706	337.49
3	86.652	350.177
4	142.384	424.332
5	75.733	367.485
6	55.354	358.321
7	78.814	706.713
8	58.381	365.086
9	56.759	375.197
10	148.817	346.837
11	138.276	376.609
12	88.76	346.864
13	70.273	341.408
14	63.57	377.968
15	88.598	342.749
16	70.868	366.082
17	109.95	425.165
18	52.543	370.71
19	99.68	348.542
20	70.652	349.272
21	74.544	366.218
22	113.194	351.092
23	77.517	365.076
24	105.139	420.386
25	95.085	384.014
26	95.463	411.617
27	59.84	358.436
28	55.137	402.466
29	60.489	362.234
30	76.544	351.309
31	124.546	370.664
32	80.706	559.106
33	73.733	369.564
34	78.76	363.87
35	52.867	424.99
36	116.978	380.491
37	86.058	376.22
38	99.409	374.153
39	104.815	376.972
40	67.841	372.665
41	82.328	371.123
42	63.3	373.604
43	156.331	375.263
44	91.409	359.76
45	114.437	374.794
46	89.139	416.098
47	95.896	367.222
48	70.327	437.671
49	101.247	371.936
50	57.624	374.931
51	53.948	378.706
52	74.165	374.05
53	65.678	376.558
54	80.274	380.393
55	79.841	380.45
56	57.3	382.509
57	66.003	378.813
58	87.193	365.856
59	54.002	378.907
60	81.517	374.377
61	104.491	377.574
62	124.492	397.213
63	94.652	363.97
64	67.57	372.268
65	58.651	381.101
66	80.057	365.275
67	65.57	383.805
68	51.732	379.599
69	64.273	427.835
70	214.765	395.575
71	109.248	368.401
72	71.841	373.726
73	65.841	413.507
74	95.301	390.448
75	105.734	372.399
76	61.192	413.958
77	54.327	380.867
78	57.624	438.077
79	97.626	382.352
80	57.246	381.002
81	84.922	392.045
82	62.219	419.701
83	90.598	362.56
84	73.03	373.281
85	109.086	381.741
86	74.003	375.133
87	67.787	374.024
88	137.789	387.392
89	82.274	383.217
90	81.409	394.847
91	123.843	372.133
92	69.949	374.606
93	73.462	381.483
94	75.841	385.748
95	82.922	372.618
96	97.031	352.347
97	132.113	371.403
98	71.841	372.667
99	62.543	381.716
100	111.032	385.748
101	161.358	374.102
102	53.624	381.709
103	77.733	359.965
104	53.624	383.096
105	71.138	411.44
106	120.708	353.904
107	50.489	380.095
108	64.273	371.513
109	111.68	369.199
110	72.976	383.182
111	60.435	420.971
112	52.759	410.532
113	88.923	380.813
114	70.057	386.031
115	54.056	393.187
116	116.924	388.46
117	124.059	372.362
118	80.219	374.805
119	75.246	386.435
120	56.813	446.952
121	64.867	397.969
122	118.491	377.865
123	62.867	413.653
124	106.112	393.871
125	69.949	387.424
126	76.652	580.97
127	127.302	454.699
128	60.056	423.67
129	72.543	375.197
130	108.383	384.352
131	74.868	384.583
132	73.462	424.909
133	67.03	373.453
134	52.056	761.945
135	80.598	397.974
136	67.246	400.194
137	54.921	431.806
138	58.219	384.412
139	66.165	432.515
140	59.083	371.943
141	62.057	416.302
142	90.166	399.291
143	82.003	366.333
144	80.328	379.931
145	103.031	358.224
146	93.896	403.012
147	86.436	454.605
148	115.356	375.988
149	96.274	379.468
150	64.111	350.133
151	76.76	964.289
152	208.927	374.14
153	59.462	359.121
154	82.003	411.776
155	74.327	365.063
156	58.975	376.459
157	96.112	382.607
158	61.678	396.11
159	64.705	366.201
160	117.518	429.035
161	107.248	370.306
162	86.328	390.232
163	71.192	370.128
164	178.926	422.659
165	68.814	370.993
166	129.248	380.616
167	68.705	372.104
168	148.925	380.902
169	74.057	363.987
170	57.408	442.819
171	54.435	370.164

## Sheet: Fasudil PEO1 
	area	mean	min	max
1	118.329	349.838	269	581	41396	765795
2	113.734	327.032	277	604	37194.8	688076
3	59.029	328.349	271	535	19382.2	358557
4	99.247	348.497	254	1182	34587.4	639841
5	84.49	306.983	243	811	25936.9	479814
6	70.165	367.384	290	477	25777.5	476864
7	69.354	383.818	254	766	26619.4	492438
8	78.382	352.15	299	532	27602	510617
9	117.735	999.487	393	2936	117674	2176883
10	100.977	417.163	307	609	42123.9	779261
11	126.438	501.534	250	2033	63412.7	1173088
12	70.435	388.989	246	1203	27398.6	506853
13	116.059	339.413	291	397	39391.8	728719
14	92.274	354.961	294	1066	32753.7	605918
15	88.544	371.398	305	1945	32885.1	608350
16	120.599	326.207	280	386	39340.4	727768
17	153.141	492.489	299	2641	75420.4	1395220
18	107.95	192.685	139	369	20800.4	384791
19	103.68	179.438	137	316	18604.2	344163
20	121.843	238.802	198	338	29096.3	538260
21	98.869	326.224	280	518	32253.4	596663
22	282.876	1050.26	352	4023	297095	5496033
23	54.867	352.549	287	542	19343.3	357837
24	156.979	475.732	288	2659	74680.2	1381527
25	236.118	272.608	194	1047	64367.6	1190752
26	126.978	1666.23	527	3187	211574	3913968
27	32.218	297.951	205	401	9599.25	177579
28	39.839	253.069	211	495	10082.1	186512
29	191.521	203.344	158	446	38944.7	720447
30	137.897	523.312	328	1681	72163.5	1334970
31	128.546	288.357	239	384	37067.1	685713
32	58.543	517.829	300	1163	30315.2	560809
33	53.462	440.667	321	1200	23558.8	435820
34	64.922	435.97	318	2260	28303.9	523600
35	137.735	431.505	293	868	59433.4	1099474
36	105.788	357.78	285	1336	37848.8	700175
37	176.061	380.454	289	841	66983.2	1239139
38	96.49	353.466	300	586	34106.1	630937
39	165.682	375.023	303	1349	62134.7	1149446
40	80.868	319.32	265	471	25822.8	477703
41	134.816	498.655	311	1473	67226.8	1243645
42	136.438	689.127	389	2098	94023.1	1739356
43	114.437	475.443	322	1813	54408.3	1006513
44	98.166	764.53	303	2592	75051	1388387
45	109.356	470.251	294	2583	51424.6	951317
46	79.679	374.746	289	527	29859.4	552376
47	158.223	611.132	311	2009	96694.8	1788782
48	37.407	356.21	293	449	13324.7	246497
49	114.059	361.929	292	608	41281.1	763670
50	93.679	371.517	303	974	34803.5	643839
51	124.437	563.039	293	2579	70063.2	1296116
52	87.463	417.197	304	1431	36489.3	675025
53	128.33	450.095	313	1436	57760.5	1068526
54	90.544	391.232	663	4095	261784	4842814
55	106.707	408.8	272	1315	43621.9	806972
56	158.925	399.354	304	1186	63467.6	1174102
57	49.407	412.175	324	1053	20364.5	376728
58	52.759	383.617	306	738	20239.2	374410
59	123.086	638.627	336	2449	78606.1	1454153
60	69.516	380.687	315	661	26463.9	489563
61	48.651	358.916	302	408	17461.5	323024
62	46.002	373.503	314	441	17181.8	317851
63	76.706	370.431	314	609	28414.2	525641
64	84.706	368.636	316	468	31225.8	577653
65	75.949	420.329	315	617	31923.6	590562
66	89.517	444.1	283	1287	39754.5	735429
67	86.166	372.977	252	928	32137.8	594526
68	139.789	428.453	304	2177	59893.2	1107980
69	90.112	664.076	372	1077	59841	1107014
70	85.841	492.261	298	4095	42256.3	781710
71	163.034	366.498	294	1059	59751.6	1105359
72	77.625	364.659	310	423	28306.6	523651
73	87.517	513.473	294	1130	44937.6	831312
74	167.953	329.335	260	1469	55312.7	1023244
75	182.98	796.578	358	2638	145758	2696417
76	81.625	490.353	334	1503	40025	740433
77	148.763	501.487	314	1130	74602.5	1380091
78	159.898	369.71	288	600	59116	1093602
79	160.061	390.265	294	1470	62466	1155574
80	180.115	380.613	310	475	68554.2	1268202
81	156.223	364.063	274	1906	56874.9	1052142
82	69.733	352.748	277	881	24598	455045
83	48.921	372.074	280	1102	18202.2	336727
84	74.814	331.595	271	570	24807.9	458927
85	66.922	407.26	306	522	27254.5	504188
86	55.083	348.771	290	444	19211.5	355398
87	92.436	471.03	327	2444	43540.2	805461
88	151.412	314.416	620	4095	350429	6482680
89	64.111	424.151	313	603	27192.6	503043
90	66.165	413.689	318	717	27371.7	506355
91	146.979	520.168	319	1434	76453.7	1414336
92	160.871	450.813	313	2028	72522.9	1341620
93	151.466	370.805	299	1066	56164.3	1038997
94	117.464	483.189	332	1312	56757.4	1049969
95	138.384	747.915	375	2576	103499	1914662
96	163.628	389.037	281	941	63657.4	1177614
97	152.925	450.082	292	3203	68828.9	1273282
98	107.085	440.121	295	1199	47130.6	871880
99	42.921	327.292	257	494	14047.6	259870
100	150.439	567.23	305	2226	85333.2	1578601
101	143.952	608.19	294	2303	87550	1619609
102	153.033	748.042	274	1305	114475	2117708
103	114.221	595.193	286	3035	67983.5	1257643
104	96.707	421.314	288	1460	40743.9	753731
105	66.759	343.154	299	461	22908.8	423795
106	50.38	379.862	302	442	19137.6	354031
107	103.193	627.496	317	2504	64753.4	1197889
108	70.652	980.599	410	3607	69280.8	1281643
109	98.328	555.827	308	1466	54653.6	1011050
110	80.382	351.618	270	925	28263.6	522856
111	51.299	1463.53	368	2459	75078.3	1388893
112	113.626	1721.61	411	3907	195620	3618814
113	65.516	422.97	205	1266	27711.4	512640
114	110.275	361.702	289	538	39886.6	737873
115	141.519	359.479	272	684	50873.2	941116
116	152.168	486.093	280	1687	73967.9	1368351
117	82.057	842.326	243	1798	69119.1	1278651
118	111.086	342.788	267	586	38078.8	704429
119	126.816	1129.32	459	2768	143215	2649375
1	151.898	460.632	289	2213	69969.1	1294375
2	169.52	343.74	260	1380	58271	1077969
3	129.735	418.327	288	1811	54271.7	1003985
4	133.303	412.864	292	1107	55035.9	1018122
5	136.006	457.45	288	1616	62215.7	1150944
6	123.248	841.943	312	4095	103768	1919629
7	127.735	348.375	300	501	44499.6	823210
8	71.138	1643.66	359	3737	116927	2163057
9	137.465	363.091	288	1676	49912.3	923340
10	190.278	375.751	307	1534	71497.1	1322642
11	96.977	340.159	301	407	32987.6	610245
12	92.166	344.524	305	405	31753.3	587413
13	134.708	338.1	294	452	45544.8	842545
14	76.219	542.684	316	1093	41363	765185
15	81.787	220.079	184	468	17999.6	332979
16	130.276	561.946	315	2533	73207.8	1354289
17	106.653	208.761	170	296	22265	411886
18	40.812	459.689	268	1346	18761	347065
1	136.276	563.875	212	1638	76842.5	1421528
2	62.759	373.697	314	710	23453	433862
3	76.49	430.835	316	1768	32954.4	609631
4	177.413	375.3	307	1016	66583	1231736
5	231.415	584.482	356	1951	135258	2502169
6	122.329	657.282	336	2105	80404.9	1487430
7	158.331	301.94	226	696	47806.3	884381
8	179.413	531.174	303	3012	95299.4	1762968
9	106.383	463.381	322	1468	49295.7	911933
10	118.978	344.158	292	488	40947.1	757491
11	116.87	429.576	321	1206	50204.4	928744
12	197.522	509.103	320	2077	100559	1860264
13	74.706	398.588	321	728	29776.8	550848
14	137.357	442.89	286	1528	60834	1125384
15	133.681	415.453	305	1334	55538.3	1027416
16	116.491	499.473	268	1776	58184.3	1076365
17	122.167	355.258	311	483	43400.8	802882
18	201.089	327.508	281	471	65858.3	1218329
19	93.409	379.47	314	838	35446	655724
20	88.382	355.418	310	434	31412.5	581108
21	85.517	353.865	306	436	30261.4	559814
22	210.873	340.795	295	427	71864.6	1329441
23	33.785	756.8	320	3105	25568.6	473000
24	48.651	679.141	327	3077	33040.6	611227
25	102.274	360.665	312	658	36886.8	682379
26	120.87	447.815	298	1585	54127.3	1001315
27	91.463	410.606	315	1081	37555.4	694746
28	103.41	347.725	307	412	35958.1	665198
29	65.3	580.219	337	2019	37888.3	700905
30	156.114	458.64	325	2038	71600.4	1324553
31	134.978	481.904	326	1529	65046.6	1203314
32	158.385	347.087	298	459	54973.4	1016966
33	113.086	352.676	300	474	39882.6	737798
34	58.11	335.99	290	647	19524.5	361189
35	113.788	335.674	291	407	38195.8	706594
36	153.736	518.284	329	1755	79678.9	1474000
37	45.894	348.17	307	458	15978.8	295596

## Sheet: NT PEO1 
	area	mean		min	max
1	71.625	2068.02		917	3076		2740127
2	68.922	817.666		416	1772		1042524
3	74.003	1259.09		515	3411		1723700
4	69.787	1000.73		509	2771		1291947
5	72.598	615.949		372	1469		827219
6	104.275	416.012		363	507		802487
7	60.435	486.102		349	1368		543462
8	60.651	401.323		304	657		450284
9	70.976	586.696		386	1160		770332
10	31.461	444.177		342	582		258511
11	88.328	426.926		300	1232		697597
12	112.005	480.381		342	960		995349
13	72.868	327.145		280	432		440991
14	73.3	385.65		307	584		522941
15	59.354	461.656		339	1198		506898
16	101.572	531.735		317	1445		999130
17	52.272	462.068		326	799		446820
18	96.436	352.859		301	496		629501
19	67.3	358.595		296	789		446451
20	101.95	309.83		265	387		584339
21	41.84	352.181		310	406		272588
22	33.731	361.768		299	695		225743
23	90.166	432.486		313	1277		721386
24	83.355	468.29		335	1369		722103
25	131.032	398.846		295	1121		966803
26	96.436	335.47		297	378		598478
27	79.409	512.28		322	1361		752540
28	65.408	369.953		308	594		447643
29	94.977	384.434		301	1027		675450
30	77.787	364.927		303	484		525130
31	61.57	408.368		319	575		465131
32	130.113	509.245		300	1824		1225752
33	95.896	390.72		314	659		693138
34	153.195	984.35		360	2680		2789649
35	134.978	352.049		287	452		879066
36	116.491	372.538		287	572		802820
37	59.3	303.386		174	526		332814
38	95.788	265.573		196	601		470595
39	177.034	271.355		141	750		888689
40	112.815	536.837		332	1424		1120378
41	99.463	445.248		314	1077		819257
42	79.138	344.141		296	417		503822
43	99.842	536.674		320	1219		991237
44	75.138	351.776		302	429		488969
45	111.14	512.553		333	1542		1053809
46	85.193	818.292		344	2285		1289628
47	159.52	569.467		335	1747		1680496
48	159.088	649.685		328	1682		1912024
49	74.76	399.219		305	1396		552120
50	135.357	535.344		361	1208		1340502
51	57.354	370.395		298	651		392989
52	61.246	359.304		306	582		407091
53	73.084	345.011		288	493		466455
54	70.652	356.125		302	511		465456
55	133.357	352.967		301	505		870770
56	118.059	527.149		356	1428		1151293
57	93.896	569.485		319	2062		989196
58	144.546	427.395		301	1101		1142854
59	133.303	448.776		340	880		1106681
60	226.063	375.581		282	1732		1570680
61	127.248	339.962		288	424		800271
62	75.679	404.165		311	2112		565831
63	197.467	340.436		296	427		1243613
64	77.787	454.213		302	1617		653613
65	179.629	356.699		302	652		1185311
66	132.113	520.244		332	1664		1271477
67	72.868	521.282		299	1608		702688
68	224.333	341.081		282	512		1415486
69	67.084	365.691		304	456		453822
70	165.142	333.25		263	1407		1018080
71	67.462	553.744		274	1850		691072
72	64.381	374.388		306	543		445896
73	97.788	334.392		288	400		604916
74	90.814	545.036		351	1157		915661
75	95.409	356.703		309	503		629580
76	189.521	350.373		300	512		1228406
77	241.631	439.032		313	1596		1962473
78	99.031	333.42		291	400		610826
79	68.705	683.172		364	1325		868311
80	79.409	351.283		294	410		516035
81	165.034	441.87		312	964		1349029
82	111.896	489.51		321	1358		1013286
83	132.762	492.533		283	1376		1209660
84	202.224	641.344		337	2408		2399269
85	107.031	339.725		285	462		672655
86	64.597	436.038		323	1175		521066
87	82.436	519.982		330	2213		792973
88	77.733	314.391		269	455		452094
89	116.816	322.851		274	402		697681
90	163.52	453.828		318	982		1372831
91	165.899	334.867		283	397		1027708
92	115.194	372.879		253	689		794606
93	49.407	438.92		316	1031		401173
94	171.412	429.932		323	1179		1363313
95	172.007	542.346		351	1298		1725744
96	58.975	286.065		251	350		312097
97	126.546	325.871		272	394		762863
98	97.517	364.456		315	438		657478
99	159.412	428.624		297	1114		1264011
100	65.192	309.413		260	555		373152
101	166.872	364.29		309	789		1124562
102	142.222	534.623		329	1163		1406592
103	66.543	356.158		300	448		438430
104	63.732	448.814		309	1270		529152
105	131.843	439.8		337	853		1072671
106	157.79	352.843		289	428		1029948
107	67.678	381.081		303	845		477114
108	75.354	338.224		292	398		471484
109	59732	631987	631.987	346	1057
110	35353	473852	473.852	309	747
111	81409	332208	332.208	285	463
112	56489	332573	332.573	282	387
113	111356	398237	398.237	281	686
114	51624	737539	737.539	460	1202
115	66165	458831	458.831	293	911
116	138114	329521	329.521	283	405
117	64111	346460	346.46	294	416
118	118005	591651	591.651	363	1233
119	70327	323978	323.978	280	463
120	11568	349140	349.14	283	636
121	57894	347504	347.504	304	480
122	77463	357383	357.383	305	492
123	25298	373694	373.694	322	515
124	116113	396833	396.833	304	849
125	99355	457741	457.741	318	745
126	64057	326616	326.616	285	390
127	31028	363744	363.744	311	458
128	29353	325204	325.204	274	375
129	68922	382366	382.366	318	512
130	119194	475154	475.154	335	1096
131	158277	416432	416.432	319	1325
132	360231	647359	647.359	292	1492
133	50326	359371	359.371	314	446
134	103626	496144	496.144	336	1234
135	99301	365362	365.362	309	589
136	62165	342677	342.677	297	395
137	133681	379748	379.748	313	1101
138	103356	369697	369.697	316	449
139	83030	366628	366.628	312	577
140	43894	323698	323.698	287	366
141	104491	475271	475.271	322	712
142	64813	433013	433.013	310	824
143	100977	348891	348.891	303	433
144	83625	358370	358.37	289	455
145	67570	329623	329.623	287	416
146	70003	416916	416.916	330	743
147	103410	382061	382.061	311	584
148	56273	351877	351.877	281	437
149	93571	410501	410.501	315	555
150	42056	350900	350.9	301	475
151	56273	352594	352.594	304	414
152	55137	370011	370.011	310	465
153	134600	401057	401.057	318	637
154	138871	349747	349.747	278	1101
155	141952	357967	357.967	299	463
156	162709	643054	643.054	357	1365
157	146817	311320	311.32	252	662
158	123140	350194	350.194	294	463
159	139627	494540	494.54	320	1024
160	141735	597795	597.795	349	1405
161	102761	560692	560.692	346	1008
162	141303	367806	367.806	301	460
163	95085	335160	335.16	278	645
164	132654	659392	659.392	323	1297
165	92761	318381	318.381	256	909
166	90112	599089	599.089	363	1892
167	126113	539334	539.334	350	1058
168	83030	410790	410.79	285	1103
169	179142	350075	350.075	191	890
170	46110	632768	632.768	326	2239
171	78003	328102	328.102	273	390
172	7406	280504	280.504	242	316
173	74814	403087	403.087	322	1812
174	106761	303421	303.421	245	451
175	92274	588745	588.745	359	1875
176	111194	310667	310.667	224	566
177	84382	353450	353.45	270	1491
178	71138	542638	542.638	295	4095
179	92166	495699	495.699	328	1105
180	289904	306227	306.227	205	691
181	232063	513660	513.66	307	1648
182	82490	427425	427.425	315	1216
183	32001	334718	334.718	297	411
184	106383	558852	558.852	356	1247
185	83247	343444	343.444	278	463
186	130005	360726	360.726	258	721
187	68057	381234	381.234	300	914
188	126978	386120	386.12	226	1003
189	101301	501878	501.878	330	899
190	93896	470930	470.93	336	1306
191	147303	601860	601.86	399	1485
192	78922	356824	356.824	290	621
193	141735	434244	434.244	296	790
194	105464	301144	301.144	251	389
195	97896	542834	542.834	295	1560
196	94220	255925	255.925	202	397
197	92436	498095	498.095	329	1061
198	105085	255568	255.568	213	350
199	33515	401400	401.4	312	680
200	168331	469579	469.579	297	1098
201	80057	324362	324.362	274	373
202	98490	264779	264.779	216	313
203	89031	304606	304.606	260	362
204	140168	275114	275.114	197	599
205	86868	302031	302.031	256	368
206	253091	570005	570.005	259	1654
207	48759	279953	279.953	230	351
208	59462	264535	264.535	216	473
209	60705	344248	344.248	289	525

## Sheet: PEO1 Fasudil
PEO1	Area	Mean
1	114.599	618.23
2	79.084	660.562
3	163.466	523.97
4	75.408	619.429
5	198.224	589.799
6	140.871	581.292
7	90.436	569.595
8	201.468	626.988
9	160.817	673.218
10	106.437	541.947
11	172.493	527.996
12	107.626	541.519
13	194.008	547.721
14	60.921	464.996
15	96.923	546.896
1	62.867	441.778
2	150.709	606.211
3	139.357	533.666
4	143.033	699.293
5	79.841	554.341
6	103.085	558.652
7	176.548	529.404
8	189.846	609.085
9	105.085	501.206
10	140.384	508.694
11	118.924	486.933
12	104.004	550.168
13	190.17	529.735
14	195.846	508.131
15	260.443	513.158
1	76.165	539.195
2	84.976	543.135
3	79.301	737.097
4	100.112	1704.64
5	60.165	738.822
6	107.031	668.705
7	81.301	565.188
8	185.305	648.888
9	133.249	723.665
10	143.033	808.567
11	132.005	790.079
12	98.49	551.981
1	154.655	653.459
2	175.467	1097.05
3	135.951	698.263
4	122.329	536.77
5	159.628	739.824
6	158.385	787.941
7	106.707	600.321
8	106.815	577.882
9	248.605	852.847
10	120.654	530.177
11	72.868	589.815
12	192.008	676.525
13	124.6	663.984
1	106.545	621.091
2	116.329	666.447
3	191.9	636.969
4	91.409	579.215
5	162.277	636.215
6	85.463	619.556
7	159.574	639.892
8	152.547	579.927
9	149.628	636.867
10	192.386	947.408
11	153.466	550.721
1	126.005	532.191
2	151.628	657.107
3	62.813	769.809
4	100.058	639.085
5	161.844	599.217
6	109.41	612.311
7	149.249	613.591
8	64.705	677.702
9	137.519	608.645
10	118.491	625.044
11	94.761	670.566
12	127.843	695.233
13	57.894	812.209
1	141.465	499.801
2	175.413	570.909
3	110.059	459.407
4	204.333	530.694
5	355.096	637.833
6	125.735	692.62
7	113.248	556.06
8	179.413	503.997
9	104.977	535.461
10	114.275	469.075
11	182.98	571.371
1	112.761	504.498
2	88.004	701.251
3	87.571	682.966
4	160.439	671.989
5	209.63	615.415
6	84.49	566.927
7	108.923	523.1
8	96.004	575.681
9	107.734	551.463
10	192.17	576.336
11	183.359	632.697
12	187.954	668.426
13	126.654	813.675
14	109.896	599.828
1	94.98	561.02
2	120.11	558.8
3	157.41	768.85
4	245.9	589.01
5	96.38	553.4
6	191.36	855.98
7	217.58	644.77
8	215.14	571.79
9	237.9	725.38
10	157.3	557.82
11	230.01	894.81
12	201.63	656.24
13	166.06	582.96
14	101.63	560.66
15	81.35	693.9
16	79.35	930.33
17	81.3	989.41
18	151.03	511.36
19	106.06	482.38
20	136.01	512.29
21	66.22	485.72
22	86.76	554.32
23	63.41	536.8
1	130.82	533.01
2	65.03	576.83
3	166.22	664.7
4	142.6	525.91
5	138.82	542
6	215.79	657.56
7	174.82	555.6
8	104.98	567.66
9	230.93	528.76
10	138.92	517.09
11	138.11	516.57
12	190.82	618.38
1	95.46	443.86
2	175.84	501.31
3	101.3	557.01
4	150.98	557.77
5	120.71	499.45
6	79.52	578.24
7	100.22	597.74
8	136.71	603.62
9	64.87	517.01
10	161.84	549.27
11	198.39	474.37
12	94.65	581.88
13	160.17	524.34
14	132.55	472.56
15	146.17	613.17
1	147.52	420.04
2	191.14	506.88
3	256.28	452.5
4	187.36	459.38
5	89.68	591.22
6	117.95	725.61
7	92.81	471.56
8	132.17	428.14
9	97.41	551.99
10	198.17	581.42
11	193.25	586.78
12	194.98	490.13
13	208.87	542.5
14	180.12	576.04
15	135.25	450.42
16	126.76	440.6
1	55.35	476.95
2	110.92	525.26
3	138.71	555.25
4	162.6	441.97
5	139.9	514.81
6	182.82	1105.43
7	80.98	1268.2
8	123.63	427.32
9	107.03	441.6
10	76.65	470.33
11	150.98	474.99
12	82	504.26
13	168.39	483.47
14	115.63	609.3
15	70.65	450.61
16	134.44	522.81
17	106.71	419.82
18	150.22	502.12
1	147.68	487.48
2	125.14	421.97
3	225.09	489.7
4	341.64	487.35
5	375.58	788.16
6	278.88	485.01
7	236.87	454.25
8	109.95	447.66
9	320.55	445.91
10	288.23	501.81
11	108.06	453.83
12	273.9	539.84
13	116.38	449.86
14	272.39	847.82
15	446.61	537.4
16	81.52	427.15
17	207.95	437.84
18	135.41	432.15
1	85.46	630.36
2	130.01	503.59
3	53.62	491.67
4	78.49	508.3
5	135.57	610.1
6	91.57	716.99
7	181.95	542.62
8	170.71	523.32
9	56.43	515.57
10	138.98	634.88
11	73.3	877.23
12	141.84	672.79
13	81.19	913.84
14	119.25	618.73
15	92.6	1537.08
16	153.84	546.22
17	87.35	538.46
18	132.98	622.37
19	67.84	567.5
20	159.57	805.7
21	57.41	843.34
			Deje en la 1028

## Sheet: PEO1 NT
	Area	Mean
1	112.76	899.57
2	120.87	599.6
3	91.68	781.2
4	130.6	811.42
5	56.38	784.47
6	134.28	748.9
7	62.81	502.8
8	124.38	596.49
9	99.09	682.38
10	103.9	663.03
11	153.9	791.35
12	114.22	600.56
13	409.69	987.42
14	71.62	512.23
15	98.54	561.47
16	134.17	807.46
17	195.85	1018.36
18	75.95	804.24
19	230.12	619.12
20	87.63	678
21	103.52	752.52
22	100.92	554.66
23	116.65	664.35
24	63.46	546.86
25	161.14	753.51
26	103.63	935.13
27	82.44	739.05
28	223.14	715.2
29	85.35	659.46
30	101.09	508
31	71.3	725.72
32	82.11	756.45
33	123.63	693.15
34	60.76	650.71
35	58.38	598.96
36	76.6	775.54
37	101.41	548.49
38	93.95	816.03
39	126.71	744.1
40	104.49	587.49
41	82.92	620.79
1	184.93	957.68
2	103.19	1218.81
3	108.82	1300.44
4	54.06	889.89
5	97.46	903.89
6	139.14	993.66
7	107.84	886.67
8	90.49	1110.32
9	84.6	776.55
10	67.89	705.95
11	54.49	922.93
12	62.54	832.02
13	68.38	799.69
14	67.89	902.44
1	127.36	561.36
2	62.27	519.94
3	127.36	736.99
4	62.65	525.98
5	86.54	591.86
6	91.08	696.18
7	50.81	523.58
8	72.92	584.67
9	73.3	654.31
10	85.25	838.35
11	67.14	704.44
12	78.81	581.4
13	56.38	569.8
14	106.82	1035.06
15	117.3	1088.33
16	114	2046.45
17	120.22	761.32
18	69.79	730.2
19	112.82	998.37
20	69.79	649.48
21	85.52	1653.18
22	137.68	632.73
23	78.06	627.27
24	76.22	627.17
25	73.14	721.1
26	126.01	831.69
27	124.65	793.51
28	96.33	635.87
29	130.71	616.82
30	129.73	584.38
31	92.65	652.88
32	95.73	860.14
33	95.79	745.59
34	118.06	771.57
35	74.22	766.51
36	132.55	690.11
37	191.36	710.6
38	59.03	810.57
39	111.95	721.83
40	115.95	701.02
41	63.46	955.45
42	68.6	523.2
43	122.28	739.98
44	66.71	1039.97
45	105.25	639.72
46	118.22	683.05
47	79.79	578.79
48	190.33	1033.18
1	148.55	831.79
2	101.09	629.39
3	138.55	640.79
4	223.74	945.69
5	68.16	712.76
6	73.84	554.14
7	165.03	693.96
8	63.95	705.68
9	65.68	870.24
10	150.33	776.86
11	66.16	607.92
12	61.08	602.99
13	65.3	737.5
14	88.27	813.17
15	73.73	765.5
16	59.68	666.09
17	81.03	551.17
18	62.76	576.5
19	52.98	540.97
20	124.55	666.86
21	82.87	865.23
22	53.52	752.39
23	81.35	605.3
24	101.95	762.88
25	56.22	672.62
26	79.03	730.35
27	120.98	696.45
28	86	847.21
29	75.41	655.26
30	88.11	747.85
31	99.63	984.74
32	107.84	1223.66
33	95.14	688.25
34	102.27	777.69
35	83.84	741.26
36	122.44	725.47
37	68.06	534.1
38	74.44	500.43
1	96	479.11
2	87.63	524.88
3	72.54	501.12
4	120	671.11
5	82.33	544.14
6	68.71	522.32
7	82.17	515.56
8	121.09	569.9
9	77.3	655.43
10	73.89	536.49
11	98.87	668.31
12	61.57	938.83
13	81.79	543.59
14	57.25	573.4
15	67.62	531.72
16	122.98	738.01
17	75.41	569.52
18	99.14	655.78
19	135.3	834.75
20	90.33	604.85
21	60.71	530.08
22	90.98	628.62
23	54.6	564.3
24	94.22	844.94
25	63.35	927.09
26	103.52	772.03
27	60.54	622.39
28	52.43	589.7
29	54.76	628.4
30	86.87	674.24
31	89.25	552.49
32	56.16	604.93
33	102.44	564.47
34	96.11	483.45
35	64	653.16
36	60.06	1789.59
37	63.41	525.76
38	103.52	523.72
39	74.92	506.61

## Sheet: PEO4 NT
	Area	Mean
1	104.11	566.29
2	85.14	555.21
3	127.25	482.65
4	78.11	645.1
5	75.62	672.91
6	64.98	768.57
7	52.7	761.65
8	80.33	638.1
9	59.79	729.1
10	108.92	533.47
11	59.73	706.22
12	77.3	771.01
13	86.65	591.31
14	56.06	793.7
15	87.14	684.72
16	91.19	725.49
17	66.49	904.64
18	66.06	868.87
19	77.03	723.08
20	64	615.6
21	59.89	679.24
22	77.84	765.85
23	70.87	553.19
24	315.04	655.68
25	117.41	817.92
26	124.28	497.93
27	131.09	463.57
28	72.49	625.29
29	85.9	517.88
30	102.06	624.13
31	90.49	533.61
32	97.57	631.97
33	124.44	561.35
34	71.95	649.23
35	56.76	617.1
36	104.38	737.3
37	74.22	629.82
38	74.54	722.58
39	53.68	708.61
40	61.03	714.04
41	59.95	714.93
1	89.79	455.9
2	59.62	497.1
3	95.52	686.04
4	118.06	519.85
5	78.49	600.87
6	99.73	514.61
7	69.57	600.94
8	92.11	639.3
9	93.52	579.88
10	81.08	614.35
11	73.35	623.95
12	62.27	627.43
13	91.14	656.73
14	131.46	506
15	83.79	601.87
16	58.54	642.76
17	77.14	667.57
18	101.46	556.38
19	75.41	700.38
20	70.44	829.98
21	70.76	645.64
22	65.19	839.84
23	84.17	903.43
24	81.9	732.79
25	76.44	1149.37
26	58.22	772.74
27	101.14	500.94
28	161.03	522.1
29	101.03	1235.55
30	98.17	501.86
31	71.19	507.55
32	59.57	755.1
33	124.6	1011.85
34	70.22	1112.3
35	125.9	470.13
36	57.68	850.96
37	53.79	715.66
38	90.98	497.37
39	108.76	483.59
40	83.03	503.79
41	97.09	565
42	78.76	1019.73
43	67.35	931.42
44	105.25	623.84
45	94.65	458.33
46	99.46	1019.94
47	78.54	691.71
48	108.11	552.85
49	144.33	539.92
50	102	573.76
51	87.79	507.41
52	161.9	539.45
1	53.73	983.45
2	82.92	683.48
3	85.95	632.94
4	70.54	531.27
5	98.33	758.1
6	95.19	546.22
7	53.41	583.48
8	86.38	672.08
9	57.25	557.35
10	78.11	574.34
11	88.38	593.48
12	126.28	716.58
13	50.6	745.11
14	103.9	553.42
15	91.25	670.26
16	211.47	697.39
17	111.68	616.22
18	98.65	586.88
19	111.09	714.61
20	74.44	601.01
21	84.81	722.9
22	76.33	581.74
23	152.65	551.06
24	95.84	799.25
25	107.25	682.8
26	89.57	680.35
27	189.58	725.58
28	156.22	736.57
29	121.95	688.61
30	221.9	1007.55
31	59.79	1704.86
32	70.6	703.36
33	99.73	640.39
34	86.92	759.18
35	94.44	600.23
36	144.33	1510.03
37	98.49	479.64
38	120.71	651.24
39	59.03	741.66
40	93.41	643.21
41	64.33	570.83
42	87.03	503.55
43	103.52	682.49
44	83.14	982.66
45	135.25	495.14
46	129.25	572.97
47	104.27	663
48	152.76	650.89
49	55.84	797.81
50	84.6	703.47
51	98.6	562.79
52	58.11	677.57
53	159.57	900.86
54	75.73	667.47
55	115.9	585.63
56	115.95	618.7
57	96.49	845.13
58	50.76	728
59	101.79	651.15
60	100.54	802.15
1	80.38	479.89
2	82.87	478.68
3	120.49	530.75
4	95.08	530.33
5	111.73	491.63
6	114.98	469.61
7	120	640.03
8	124.49	588.37
9	76.76	473.26
10	179.3	480.85
11	69.95	587.41
12	97.09	485.05
13	93.14	726.26
14	63.73	550.18
15	132.33	592.85
16	56.98	926.66
17	83.19	509.73
18	98.92	597.27
19	79.35	529.75
20	81.19	671.38
21	145.36	442.49
22	58.6	846.41
23	118.11	450.52
24	64.27	932.42
25	85.57	561.91
26	139.03	455.4
27	96.98	469.69
28	126.33	461.96
29	78.38	520.46

## Sheet: PEO4 Fasudil
	Area	Mean
1	145.573	411.515
2	60.327	490.878
3	104.22	414.902
4	194.602	707.837
5	72.435	481.534
6	159.304	598.771
7	212.495	507.62
8	149.844	615.057
9	120.437	460.102
10	126.438	458.164
11	189.089	507.172
12	57.516	561.618
13	70.219	563.964
14	122.275	448.012
15	110.491	464.18
16	121.464	442.934
17	102.707	459.845
1	105.68	501.399
2	84.706	502.084
3	119.843	476.114
4	123.14	592.754
5	199.9	539.152
6	138.708	552.573
7	123.356	507.837
8	137.087	557.504
9	146.384	495.432
10	95.085	530.238
11	114.545	511.535
12	165.736	503.001
13	380.286	593.159
14	119.518	579.238
15	133.303	571.209
16	120.978	494.939
17	120.924	557.107
18	142.06	586.013
19	135.087	482.637
20	103.572	563.23
21	383.205	613.57
22	103.95	510.041
23	135.627	768.385
24	88.382	664.552
25	102.274	685.376
26	98.058	556.58
27	126.87	560.01
28	75.895	652.339
29	122.167	923.004
30	70.706	696.115
1	157.628	526.11
2	96.49	499.426
3	96.004	487.764
4	142.06	607.724
5	120.491	619.118
6	57.84	478.022
7	84.76	490.909
8	207.144	548.677
9	154.168	642.189
10	150.276	482.976
11	163.79	494.334
12	177.575	593.503
13	122.87	1372.15
14	110.491	481.438
15	239.145	768.056
16	78.057	885.539
17	156.223	462.624
18	135.141	528.52
19	91.733	479.293
20	106.491	447.456
21	267.254	436.058
22	135.195	476.483
1	156.114	449.303
2	97.409	527.695
3	51.516	499.987
4	62.705	458.922
5	137.087	481.287
6	64.597	930.194
7	79.895	706.198
8	174.872	494.629
9	235.793	526.326
10	168.71	585.296
11	162.223	486.846
12	184.062	521.777
13	126.275	485.462
14	118.762	544.76
15	92.49	518.319
16	79.084	575.833
17	137.952	479.819
18	94.652	473.721
19	123.627	595.8
20	96.49	479.883
21	137.843	650.136
22	191.792	542.265
23	77.354	788.952
24	160.925	565.989
25	127.194	519.632
26	95.085	871.504
27	165.466	654.79
28	53.408	983.971
29	82.706	548.184
30	215.793	1120.78
31	122.275	506.335
32	140.979	488.97
33	109.302	503.977
1	164.439	563.602
2	118.113	477.498
3	150.763	721.956
4	158.763	477.092
5	118.87	527.04
6	116.329	504.97
7	149.087	548.806
8	108.869	577.211
9	227.631	581.693
10	169.196	800.723
11	377.475	533.243
12	111.626	456.253
13	209.954	507.257
14	96.923	445.858
15	160.439	657.029
16	130.222	582.535
17	116.599	662.674
1	127.086	495.586
2	133.519	636.575
3	151.357	609.578
4	84.922	478.437
5	169.953	581.348
6	279.957	591.679
7	129.465	457.652
8	141.573	451.594
9	96.599	489.412
10	251.199	737.262
11	235.901	1029.77
12	139.249	560.38
13	140.817	508.895
14	144.925	538.664
15	148.493	482.325
16	150.006	645.931
17	88.004	799.437
18	66.814	473.537
19	124.167	572.59
20	79.138	479.171
1	135.897	441.077
2	107.139	642.992
3	82.868	505.645
4	133.573	394.399
5	90.058	467.792
6	88.004	695.469
7	155.033	560.783
8	94.382	529.214
9	138.816	1191.23
10	161.628	505.008
11	162.655	499.021
12	71.354	522.173
13	69.787	1207.06
14	175.953	540.149
15	143.79	550.623
16	144.438	556.648
17	98.869	447.184
18	80.219	609.276
19	103.085	642.414
20	114.761	459.196
21	158.385	554.225
22	179.953	474.676
23	142.925	520.4
24	123.086	604.624
1	147.736	490.562
2	75.3	446.474
3	115.788	421.909
4	79.084	453.662
5	72.76	487.09
6	52.002	402.288
7	121.464	405.187
8	163.79	393.947
9	127.302	428.945
10	127.789	396.999
11	115.788	399.736
12	187.845	422.123
13	154.277	471.112
14	153.033	474.814
15	65.841	503.297
