# Supplementary material for: Inhibitors of Rho kinases (ROCK) induce multiple mitotic defects and synthetic lethality in BRCA2-deficient cells
Source: eLife journal article supplement (doi:10.7554/elife.80254), 2023-04-19
Supplement: supp [file Figure 4- source data 1.xlsx]

## Sheet: Figure 4 A; B and C
A-B Cell cycle analysis of PEO4 and PEO1 cells following 3 or 6 days of Fasudil treatment (96 and 128 μM). Cells were stained with propidium iodide, and DNA content was analyzed via FACS (10,000 events per sample).
C) Cell cycle analysis of PEO4 and PEO1 cells following a time course with Fasudil treatment (1-5 days, 64 μM). Cells were stained with propidium iodide, and DNA content was analyzed via FACS (10,000 events per sample).
		Data available in Dryad o request to the authors

## Sheet: 3 days
Exp1	columna 1
Experiment to 3 days
Fases de mitosis
		PEO4		PEO1
		NT	128 uM Fasudil	NT	128 uM Fasudil
	Prophase	9	8	10	9
	Pro+Meta	76	80	77	82
	Anaphase	8	4	3	3
	Telophase	7	8	10	6
	TOTAL	100	100	100	100
		PEO4		PEO1
		NT	128 uM Fasudil	NT	128 uM Fasudil
	Abnormal	11	9	18	37
	TOTAL	9.90991	8.25688	15.2542	27.0073
Exp2	columna 2
Experiment to 3 days
		PEO4		PEO1
		NT	128 uM Fasudil	NT	128 uM Fasudil
	Prophase	5	5	5	8
	Pro+Meta	82	81	81	83
	Anaphase	7	7	7	4
	Telophase	6	7	7	5
	TOTAL	100	100	100	100
		PEO4		PEO1
		NT	128 uM Fasudil	NT	128 uM Fasudil
	Abnormal	9	9	11	30
	TOTAL	8.25688	8.25688	9.90991	23.0769
Exp3

## Sheet: 6 days
Aberrant metaphases
Exp1	columna 2
Experiment to 6 days
Fases de mitosis
		PEO4		PEO1
		NT	128 uM Fasudil	NT	128 uM Fasudil
	Prophase	3	5	5	2
	Pro+Meta	85	88	83	34
	Anaphase	6	3	5	1
	Telophase	6	4	7	0
	TOTAL	100	100	100	37
		PEO4		PEO1
		NT	128 uM Fasudil	NT	128 uM Fasudil
	Prophase	3	5	5	5.40541
	Pro+Meta	85	88	83	91.8919
	Anaphase	6	3	5	2.7027
	Telophase	6	4	7	0
	TOTAL	100	100	100	100
		PEO4		PEO1
		NT	128 uM Fasudil	NT	128 uM Fasudil
	Abnormal	10	14	15	25
	TOTAL	10	14	15	25
	% TOTAL	9.09091	12.2807	13.0435	40.3226
	Abnormal: any mitotic cell whose DNA stain does not look normal
Exp2	columna 1
Experiment to 6 days
Fases de mitosis
		PEO4		PEO1
		NT	128 uM Fasudil	NT	128 uM Fasudil
	Prophase	9	10	12	6
	Pro+Meta	68	78	77	46
	Anaphase	4	3	3	3
	Telophase	8	9	8	3
	TOTAL	89	100	100	58
		PEO4		PEO1
		NT	128 uM Fasudil	NT	128 uM Fasudil
	Prophase	10.1124	10	12	10.3448
	Pro+Meta	76.4045	78	77	79.3103
	Anaphase	4.49438	3	3	5.17241
	Telophase	8.98876	9	8	5.17241
	TOTAL	100	100	100	100
		PEO4		PEO1
		NT	128 uM Fasudil	NT	128 uM Fasudil
	Abnormal	16	18	12	13
	TOTAL	16	18	12	13
	% TOTAL	15.2381	15.2542	10.7143	18.3099
	Abnormal: any mitotic cell whose DNA stain does not look normal
Exp3	columna 3

## Sheet: Figure 4 E s
Percent of aberrant metaphases
Percent of aberrant metaphases in PEO4 and PEO1 cells 3 or 6 days after Fasudil treatment (128 μM)
Aberrant metaphases
		3 dias
		Exp 2	Exp 3	Exp 4	AVG	SEM
		(128 uM)	(128 uM)	(96 uM)
PEO4	PEO4-NT	9.90991	8.25688	7	8.38893	0.842609
	PEO4-Fasudil	8.25688	8.25688	12	9.50459	1.24771
PEO1	PEO1-NT	15.2542	9.90991	11	12.0547	1.63042
	PEO1-Fasudil	27.0073	23.0769	25	25.0281	1.13469
		6 dias
		Exp 2	Exp 3	Exp 4*	AVG	SEM
PEO4	NT	15.2381	9.09091	8	10.7763	2.253
	Fasudil	15.2542	12.2807	7	11.5116	2.41362
PEO1	NT	10.7143	13.0435	13	12.2526	0.769254
	Fasudil	18.3099	40.3226	28	28.8775	6.36965
