# Supplementary material for: Inhibitors of Rho kinases (ROCK) induce multiple mitotic defects and synthetic lethality in BRCA2-deficient cells
Source: eLife journal article supplement (doi:10.7554/elife.80254), 2023-04-19
Supplement: supp [file Figure 5- figure supplement 1- source data 1.xlsx]

## Sheet: Figure 5- figure supplement 1 A
Frequency of chromosome aberrations in shScramble or shBRCA2 HCT116p21-/- cells following treatment with olaparib (0.5 μM) or Fasudil (32 μM)
Citogenetic 32uM fasudil
Exp 1 Fasudil
				Chromatidic			Chromosomic				Chromatidic
				Gaps	Breaks	Exch	Gaps	Breaks	Exch	Metaphase	Gaps	Breaks	Exch	total	Gaps	Breaks	Exch
		SCR	NT	0	15	2	0	0	0	50	0	0.3	0.04	0.34	0	0.3	0.04												Total Aberrations
			Olap 0.5uM	4	11	1	0	0	0	50	0.08	0.22	0.02	0.32	0.08	0.22	0.02												Gaps	Breaks	Exch
			Fasudil 16uM	0	8	6	0	3	1	58	0	0.137931	0.103448	0	0.0517241	0.0172414	0.241379										SCR	NT	0	0.3	0.04
		shBRCA2.3	NT	3	18	3	0	0	0	50	0.06	0.36	0.06	0.48	0.06	0.36	0.06											Olap 0.5uM	0.0816327	0.22449	0.0204082
			Olap 0.5uM	9	38	10	0	2	2	50	0.18	0.76	0.2	1.22	0.18	0.8	0.24											Fasudil 4uM	0.18	0.32	0.06
			Fasudil 16uM	3	16	20	0	2	1	60	0.05	0.266667	0.333333	0	0.0333333	0.0166667	0.65										shBRCA2.3	NT	0.06	0.36	0.06
																												Olap 0.5uM	0.18	0.8	0.24
Exp 2 Fasudil																												Fasudil 4uM	0.1	0.38	0.18
			Chromatidic			Chromosomic				Chromatidic			Chromosomic			Total chromatidic frecuency
			Gaps	Breaks	Exch	Gaps	Breaks	Exch	Metaphase	Gaps	Breaks	Exch	Gaps	Breaks	Exch
	SCR	NT	2	13	4	0	0	0	50	0.04	0.26	0.08	0	0	0	0.38
		Olap 0.5uM	4	21	5	0	0	1	51	0.0784314	0.411765	0.0980392	0	0	0.0196078	0.588235
	shBRCA2.3	NT	2	17	4	0	0	0	51	0.0392157	0.333333	0.0784314	0	0	0	0.45098
		Olap 0.5uM	15	63	42	0	1	1	58	0.258621	1.08621	0.724138	0	0.0172414	0.0172414	2.06897
Exp 3
		Chromatidic			Chromosomic				Chromatidic			Chromosomic
		Gaps	Breaks	Exch	Gaps	Breaks	Exch	Metaphase	Gaps	Breaks	Exch	Gaps	Breaks	Exch
B2.3	NT	3	19	1	1	2	1	60	0.05	0.316667	0.0166667	0.0166667	0.0333333	0.0166667
	Olap 0.5uM	5	37	21	0	4	1	60	0.0833333	0.616667	0.35	0	0.0666667	0.0166667
	Fasudil 4uM	2	24	12	1	1	1	60	0.0333333	0.4	0.2	0.0166667	0.0166667	0.0166667
	Fasudil 16uM	1	13	9	0	3	0	61	0.0163934	0.213115	0.147541	0	0.0491803	0
Exp 4
			Chromatidic			Chromosomic				Chromatidic			Chromosomic			Total chromatidic frecuency	Total Exchanges	Total Chromosomic frecuency	Total
			Gaps	Breaks	Exch	Gaps	Breaks	Exch	Metaphase	Gaps	Breaks	Exch	Gaps	Breaks	Exch					Gaps	Breaks	Exch
	SCR	NT	2	13	1	0	1	0	60	0.0333333	0.216667	0.0166667	0	0.0166667	0	0.266667	0.0166667	0.0166667	0.283333	0.0333333	0.233333	0.0166667
		Olap 0.5uM	3	17	2	0	1	0	60	0.05	0.283333	0.0333333	0	0.0166667	0	0.366667	0.0333333	0.0166667	0.4	0.05	0.3	0.0333333
		Fasudil	3	11	1	0	2	2	60	0.05	0.183333	0.0166667	0	0.0333333	0.0333333	0.25	0.05	0.0666667	0.3	0.05	0.216667	0.05
	shBRCA2.3	NT	2	14	4	0	0	1	50	0.04	0.28	0.08	0	0	0.02	0.4	0.1	0.02	0.5	0.04	0.28	0.1
		Olap 0.5uM	6	38	11	0	1	0	60	0.1	0.633333	0.183333	0	0.0166667	0	0.916667	0.183333	0.0166667	1.1	0.1	0.65	0.183333
		Fasudil	0	21	11	0	0	0	60	0	0.35	0.183333	0	0	0	0.533333	0.183333	0	0.716667	0	0.35	0.183333

## Sheet: Figure 5- figure supplement 1 B
Percent of shScramble or shBRCA2 HCT116p21-/- cells with micronuclei in binucleated cells
MN exp1
HCT116
		HCT p21-
			NT SCR	NT B2	SCR Ola 0,5uM	B2 Ola 0.5uM	SCR Fasudil 32uM	B2 Fasudil 32uM
		Binucleadas	351	256	245	184	182	219
		1M	12	9	14	24	7	10
		2M	2	2		3	1
		3M
		4M
		Rosetas/Multinucleated cells	35	72	41	89	110	71
		Rosetas con MN
		Total	400	339	300	300	300	300
		%MN in binucleated cells	3.5	3.24484	4.66667	9	2.66667	3.33333
		%MN in binucleated cells	3.9886	4.29688	5.71429	14.6739	4.3956	4.56621
		% Multinucleated cells	8.75	21.2389	13.6667	29.6667	36.6667	23.6667
		% Multinucleated cells	0	0	0	0	0	0
		with MN
											MN exp3
											HCT116
Exp 2	HCT p21-
		NT SCR	NT B2	SCR Ola 0,5uM	B2 Ola 0.5uM	SCR Fasudil 32uM	B2 Fasudil 32uM						NT SCR	NT B2	SCR Ola 0,5uM	B2 Ola 0.5uM	SCR Fasudil 32uM	B2 Fasudil 32uM
	Binucleadas	284	249	279	226	196	224					Binucleadas	266	262	265	227	210	214
	1M	2	14	6	24	7	10					1M	6	17	8	17	2	10
	2M	1	3		1		1					2M		1		1		1
	3M											3M
	4M											4M
	Rosetas/Multinucleated cells	24	35	25	60	59	64					Rosetas/Multinucleated cells	28	26	27	55	88	75
	Rosetas con MN	0	0	1	1	2	2					Rosetas con MN
	Total	311	301	311	312	264	301					Total	300	306	300	300	300	300
	%MN in binucleated cells	0.96463	5.64784	1.92926	8.01282	2.65152	3.65449					%MN in binucleated cells	2	5.88235	2.66667	6	0.666667	3.66667
	%MN in binucleated cells	1.05634	6.82731	2.15054	11.0619	3.57143	4.91071					%MN in binucleated cells	2.25564		3.01887	7.92952	0.952381	5.14019
	% Multinucleated cells	#DIV/0!	11.6279	8.03859	19.2308	22.3485	21.2625					% Multinucleated cells	9.33333	8.49673	9	18.3333	29.3333	25
	% Multinucleated cells	0	0	0.321543	0.320513	0	0					% Multinucleated cells	0	0	0	0	0	0
	with MN											with MN
	Faltó B1 Fasudil 32uM
		NT SCR	NT B2	SCR Ola 0,5uM	B2 Ola 0.5uM	SCR Fasudil 32uM	B2 Fasudil 32uM
	MN	0.996678	5.64784	1.92926	4.96689	2.65152	3.32226
	% Multinucleated cells	7.71704	11.6279	8.03859	19.8675	22.3485	21.2625
