# Supplementary material for: Inhibitors of Rho kinases (ROCK) induce multiple mitotic defects and synthetic lethality in BRCA2-deficient cells
Source: eLife journal article supplement (doi:10.7554/elife.80254), 2023-04-19
Supplement: supp [file Figure 5- source data 1.xlsx]

## Sheet: Figure 5 B
Percentage of anaphases with chromosomes bridges and lagging chromosomes
Percentage of anaphases with chromosomes bridges and lagging chromosomes in PEO4 and PEO1 cells treated with Fasudil
Anaphases aberrations PEOs
Exp N°1
Cell	Treatment	Normal Anaphases	Bridge	Lagging	Total cells	% Bridge	% Lagging
PEO 1	NT	64	14	4	82	17.0732	4.87805
	Fasudil	62	32	10	104	30.7692	9.61538
PEO 4	NT	72	12	6	90	13.3333	6.66667
	Fasudil	74	12	4	90	13.3333	4.44444
Exp N°2
Cell	Treatment	Bridge	Lagging	Normal Anaphases	Total cells	% Bridge	% Laaging
PEO 1	NT	5	2	42	49	10.2041	4.08163
PEO 1	Fasudil	10	5	34	49	20.4082	10.2041
PEO 4	NT	5	0	47	52	9.61538	0
PEO 4	Fasudil	5	1	45	51	9.80392	1.96078

## Sheet: Figure 5 C
Percentage of anaphases with chromosomes bridges and lagging chromosomes
Percentage of anaphases with chromosomes bridges and lagging chromosomes in shScramble- or shBRCA2-transduced HCT116p21-/- cells treated with Fasudil
Anaphases Aberration
Exp1 Fasudil	columna 5
Cells	Tratamiento	Normal Anaphases	bridge	Lagging	total cell	% normal	%bridge	%lagging
HCT116 SCR	NT	144	15	4	163	88.3436	9.20245	2.45399
HCT116 SCR	Fasudil 32	80	10	2	92	86.9565	10.8696	2.17391
HCT116 BRCA2 -/-	NT	97	8	4	109	88.9908	7.33945	3.66972
HCT116 BRCA2 -/-	Fasudil 32	54	20	4	78	69.2308	25.641	5.12821
Exp2 Fasudil	columna 6
Cells	Tratamiento	Normal Anaphases	bridge	Lagging	total cell	% normal	%bridge	%lagging
HCT116 SCR	NT	125	15	6	146	85.6164	10.274	4.10959
HCT116 SCR	Fasudil 32	89	15	5	109	81.6514	13.7615	4.58716
HCT116 BRCA2 -/-	NT	107	12	9	119	89.916	10.084	7.56303
HCT116 BRCA2 -/-	Fasudil 32	64	31	5	78	82.0513	37.7812	13.2341
Exp3
Cells	Tratamiento	Normal Anaphases	bridge	Lagging	total cell	% normal	%bridge	%lagging
HCT SCR	NT	72	7	2	81
HCT SCR	Fasudil 32	40	5	1	46
HCT BRCA2 -/-	NT	49	4	2	55
HCT BRCA2 -/-	Fasudil 32	27	10	2	39

## Sheet: Figure 5 D I
qPCR ROCK1
Description of the Experiment (Title, Comment, Number)
Calculation Procedure for MNE			2
Threshold for SEM in %			20
							Mean of Triplicates
Well	Description	CT of Target Gene	CT of Reference Gene	Normalized Expression			Description	Mean Normalized Expression	SE of Mean Normalized Expression	SE of Mean Normalized Expression in %
A1	LUC	21.74	18.09	0.524186			LUC	0.492795	0.0173032	3.51124
A2		21.76	17.96	0.468371			ROCK1	0.0428031	0.00345971	8.08285
A3		21.7	17.96	0.487443
A4	ROCK1	24.86	17.62	0.0459468
A5		24.98	17.79	0.0483029
A6		25.14	17.52	0.0019686
A7
A8
A9
A10
A11
A12
B1
B2
B3
B4
B5
B6
B7
B8
B9
B10
B11
B12
C1
C2
C3
C4
C5
C6
C7
C8
C9
C10
C11
C12
D1
D2
D3
D4
D5
D6
D7
D8
D9
D10
D11
D12
E1
E2
E3
E4
E5
E6
E7
E8
E9
E10
E11
E12
F1
F2							LUC	1	0.0351124
F3							ROCK1	0.0868578	0.0808285
F4
F5
F6
F7
F8
F9
F10
F11
F12
G1	sample 25
G2
G3
G4	sample 26
G5
G6
G7	sample 27
G8
G9
G10	sample 28
G11
G12
H1	sample 29
H2
H3
H4	sample 30
H5
H6
H7	sample 31
H8
H9
H10	sample 32
H11
H12

## Sheet: Figure 5 D I´
Description of the Experiment (Title, Comment, Number)
Calculation Procedure for MNE			2
Threshold for SEM in %			20
							Mean of Triplicates
Well	Description	CT of Target Gene	CT of Reference Gene	Normalized Expression			Description	Mean Normalized Expression	SE of Mean Normalized Expression	SE of Mean Normalized Expression in %
A1	LUC	24.74	19.09	0.152927			LUC	0.143769	0.00504808	3.51124
A2		24.76	18.96	0.136643			ROCK1	0.0472344	0.00381788	8.08285
A3		24.7	18.96	0.142207
A4	ROCK1	25.86	18.62	0.0507035
A5		25.98	18.79	0.0533035
A6		26.14	18.52	0.00188704
A7
A8
A9
A10
A11
A12
B1
B2
B3
B4
B5
B6
B7
B8
B9
B10
B11
B12
C1
C2
C3
C4
C5
C6
C7
C8
C9
C10
C11
C12
D1
D2
D3
D4
D5
D6
D7
D8
D9
D10
D11
D12
E1
E2
E3
E4
E5
E6
E7
E8
E9
E10
E11
E12
F1
F2							LUC	1	0.0351124
F3							ROCK1	0.328544	0.0808285
F4
F5
F6
F7
F8
F9
F10
F11
F12
G1	sample 25
G2
G3
G4	sample 26
G5
G6
G7	sample 27
G8
G9
G10	sample 28
G11
G12
H1	sample 29
H2
H3
H4	sample 30
H5
H6
H7	sample 31
H8
H9
H10	sample 32
H11
H12

## Sheet: Figure 5 D II
qPCR ROCK2
Description of the Experiment (Title, Comment, Number)
Calculation Procedure for MNE			2
Threshold for SEM in %			20
							Mean of Triplicates
Well	Description	CT of Target Gene	CT of Reference Gene	Normalized Expression			Description	Mean Normalized Expression	SE of Mean Normalized Expression	SE of Mean Normalized Expression in %
A1	LUC	26.98	18.96	0.0312067			LUC	0.0372224	0.00656148	17.6278
A2		26.45	18.96	0.0443978			ROCK2	0.0125789	0.00105035	8.3501
A3
A4	ROCK2	28.49	18.95	0.0113424
A5		28.42	19.16	0.0139501
A6
A7
A8
A9
A10
A11
A12
B1
B2
B3
B4
B5
B6
B7
B8
B9
B10
B11
B12
C1
C2
C3
C4
C5
C6
C7
C8
C9
C10
C11
C12
D1
D2
D3
D4
D5
D6
D7
D8
D9
D10
D11
D12
E1
E2
E3
E4
E5
E6
E7
E8
E9
E10
E11
E12
F1
F2							LUC	1	0.176278
F3							ROCK2	0.337938	0.083501
F4
F5
F6
F7
F8
F9
F10
F11
F12
G1	sample 25
G2
G3
G4	sample 26
G5
G6
G7	sample 27
G8
G9
G10	sample 28
G11
G12
H1	sample 29
H2
H3
H4	sample 30
H5
H6
H7	sample 31
H8
H9
H10	sample 32
H11
H12

## Sheet: Figure 5 DII
ROCK2
Calculation Procedure for MNE			2
Threshold for SEM in %			20
							Mean of Triplicates
Well	Description	CT of Target Gene	CT of Reference Gene	Normalized Expression			Description	Mean Normalized Expression	SE of Mean Normalized Expression	SE of Mean Normalized Expression in %
A1	LUC	30.55	21.84	0.0261895			LUC	0.0230122	0.00467581	20.3188
A2		30.71	21.25	0.0150043			ROCK2	0.00590823	0.000779141	13.1874
A3		29.94	21.53	0.000940409
A4	ROCK2	31.52	20.74	0.00593007
A5		31.36	20.44	0.00524542
A6		31.18
A7
A8
A9
A10
A11
A12
B1
B2
B3
B4
B5
B6
B7
B8
B9
B10
B11
B12
C1
C2
C3
C4
C5
C6
C7
C8
C9
C10
C11
C12
D1
D2
D3
D4
D5
D6
D7
D8
D9
D10
D11
D12
E1
E2
E3
E4
E5
E6
E7
E8
E9
E10
E11
E12
F1
F2							Luc	1	0.203188
F3							ROCK2	0.256743	0.0338577
F4
F5
F6
F7
F8
F9
F10
F11
F12
G1	sample 25
G2
G3
G4	sample 26
G5
G6
G7	sample 27
G8
G9
G10	sample 28
G11
G12
H1	sample 29
H2
H3
H4	sample 30
H5
H6
H7	sample 31
H8
H9
H10	sample 32
H11
H12

## Sheet: Figure 5 E
Percentage of anaphases with chromosomes bridges and lagging chromosomes
Percentage of anaphases with chromosomes bridges and lagging chromosomes in shScramble- or shBRCA2-transduced HCT116p21-/- cells treated with Fasudil
Exp Nº1
Cells	tratamiento	Normal Anaphases	Bridge	Lagging	total	%brdige	%lagging
HCT116 BRCA2-/-	Rock1+2	48	26	6	80	32.5	7.5
	Non-treated	52	6	2	60	10	3.33333
Exp Nº2
Cells	tratamiento	Normal Anaphases	Bridge	Lagging	total	%brdige	%lagging
HCT116 BRCA2-/-	Rock1+2	62	24	4	90	26.6667	4.44444
	Non-treated	50	8	4	62	12.9032	6.45161
