# Supplementary material for: Inhibitors of Rho kinases (ROCK) induce multiple mitotic defects and synthetic lethality in BRCA2-deficient cells
Source: eLife journal article supplement (doi:10.7554/elife.80254), 2023-04-19
Supplement: supp [file Figure 6- figure supplement 1- source data 1.xlsx]

## Sheet: Figure 6- figure supplement 1 A
Percent of binucleated PEO1 cells transfected with siROCK (1+2) or treated with Fasudil
PEOs 22-4 exp 2 binucleadas
Celulas	Tratamiento	Binucleadas	Mononucleadas	total	%binucleadas
PEO1	NT	2	217	219	0.913242
PEO1	Fasudil	29	169	198	14.6465
PEO1	siROCK1+2	18	195	213	8.4507
PEO4	NT	3	212	215	1.39535
PEO4	Fasudil	3	230	233	1.28755
PEO4	siROCK1+2	0	202	202	0
exp 1 binucleadas
Celulas	Tratamiento	Mononucleadas	Binucleadas	Multinucleadas	total de celulas	% binucleadas	% multinucleadas
PEOs
PEO1	NT	122	4	0	126	3.1746	0
PEO1	siROCK 1 y 2	151	33	6	190	17.3684	3.15789
PEO1	Fasudil	217	43	12	272	15.8088	4.41176

## Sheet: Figure 6- figure supplement 1 B
Percent of binucleated shBRCA2 HCT116p21-/- cells transfected with siROCK (1+2) or treated with Fasudil
exp N°2
Cell	Treatment	Mononuclear	Binuclear	Multinucleated	total cells	% binucleated	% multinucleated
HCT 116
BRCA2	non-treated	177	6	1	184	3.26087	0.543478
BRCA2	ROCK1	143	15	2	160	9.375	1.25
BRCA2	ROCK1+2	156	22	5	183	12.0219	2.73224
BRCA2	Fasudil	183	26	19	228	11.4035	8.33333
Exp Nª1
Cell	Treatment	Mononuclear	Binuclear	Multinucleated	total cells	% binucleated	% multinucleated	% multinucleated cells
HCT 116
BRCA2	non-treated	171	3	2	176	1.70455	1.13636
BRCA2	Fasudil	162	36	11	209	17.2249	5.26316
BRCA2	Rock1	158	17	4	179	9.49721	2.23464
BRCA2	Rock2	138	5	3	146	3.42466	2.05479
HCT 116 BRCA 2	Rock1+2	146	22	4	172	12.7907	2.32558

## Sheet: Figure 6- figure supplement 1 D
Quantification of cyclin A positive cells in each group: mononucleated; binucleated
fecha del vidrio 22-4
cells	treatment	binucleated		total binucleatd	% ciclina A+ binucleated	mononucleated		total mononucleated	% ciclina A+ Mononucleadas	% ciclina A- Mononucleadas	multinucleated		Total multinucleated
		Ciclina+	Ciclina-			Ciclina+	Ciclina-				Ciclini+	Ciclina-
PEO1	NT	7	19	26	26.9231	68	107	175	38.8571	61.1429	0	0	0
PEO1	Fasudil	40	75	115	34.7826	62	83	145	42.7586		1	8	9
					73.0769
PEOs %binucleadas 26-3
cells	treatement	binucleated + Cilcina	Binucleadas - Ciclina	Mononucleadas + ciclina	Mononucleadas - ciclina	Total binucleadas	Total Mononucleadas	% binucleadas positivas Ciclinas	% Mononulceadas ciclina +
PEO1	NT	20	33	133	168	53	301	37.7358	44.186
PEO1	Fasudil	22	50	113	130	72	243	30.5556	46.5021
porcentajes para el grafico
		% monuncleadas negativas	% Monucleadas positivas	Mononulceadas %	distribucion dentro del porcentaje poblacional de monucleadas - ciclina	distribucion dentro del porcentaje poblacional de monucleadas + ciclina	Suma distribucion	Suma distribucion			% binucleadas negativas
PEO1	NT	59.0762	38.8571	97.9333	60.3228	39.6772	97.9333	100			100
		% Binucleadas negativas	% Binucleadas positivas	Binucleated %	distribucion dentro del porcentaje poblacional de Binucleadas - ciclina	distribucion dentro del porcentaje poblacional de Binucleadas + ciclina					100
PEO1	NT		26.9231	2.0667
fecha del vidrio 22-4
						Distribucion
				NT	Mononulceadas %	Mono +	Mono -
					97.9333	38.04	59.87	97.91
						Distribucion			99.9697
					Binucleated %	Binucle +	Binucle -
					2.0667	0.55	1.5097	2.0597
				Fasudil	Mononulceadas %	Mono +	Mono -
					84.27	36.0326	48.237	84.2696
						Distribucion			99.9983
					Binucleated %	Binucle +	Binucle -
					15.73	5.4712	10.2575	15.7287
Celulas	tratamiento	Binucleadas		total Binucleadas	% ciclina A+ Binucleadas	mononucleadas		total Mononucleadas	% ciclina A+ Mononucleadas	% ciclina A- Mononucleadas	multinucleadas		Total Multinucleadas
		Ciclina+	Ciclina-			Ciclina+	Ciclina-				Ciclini+	Ciclina-
PEO1	Fasudil	40	75	115	34.7826	62	83	145	42.7586	57.2414	1	8	9
					65.2174
