# Supplementary material for: Inhibitors of Rho kinases (ROCK) induce multiple mitotic defects and synthetic lethality in BRCA2-deficient cells
Source: eLife journal article supplement (doi:10.7554/elife.80254), 2023-04-19
Supplement: supp [file Figure 6- source data 1.xlsx]

## Sheet: Figure 6 B
Percent of binucleated and multinucleated cells
Percent of binucleated and multinucleated PEO4 and PEO1 cells after 3 days of Fasudil treatment
128 uM	3 dias							SUMAS de 3,4,5
	PEO4-NT	Exp 1	Exp 2	Exp 3	Average	SEM
	1	97.3	98.5	98	97.9333	0.34801
	2	2.7	1.5	2	2.06667	0.34801		Exp 1	Exp 2	Exp 3
	3	0	0	0	0	0	PEO4-NT	0	0	0
	4	0	0	0	0	0	PEO4-F	0	1.5	0.5
	5+	0	0	0	0	0	PEO1-NT	0	0.5	0.5
	PEO4-Fasu	Exp 1	Exp 2	Exp 3	Average	SEM	PEO1-F	3.7	7.9	9
	1	97	94.7	93.5	95.0667	1.02686
	2	3	3.9	6	4.3	0.888819
	3	0	1	0.5	0.5	0.288675
	4	0	0	0	0	0
	5+	0	0.5	0	0.166667	0.166667
	PEO1-NT	Exp 1	Exp 2	Exp 3	Average	SEM
	1	98	97.5	97.5	97.6667	0.166667
	2	2	2	2	2	0
	3	0	0.5	0.5	0.333333	0.166667
	4	0	0	0	0	0
	5+	0	0	0	0	0
	PEO1-Fasu	Exp 1	Exp 2	Exp 3	Average	SEM
	1	89.2	76.5	66.5	77.4	6.56836
	2	7	15.7	24.5	15.7333	5.05184
	3	1.4	3.4	4.5	3.1	0.907377
	4	0	2	1.5	1.16667	0.600925
	5+	2.3	2.5	3	2.6	0.208167

## Sheet: Figure 6 C
Percent of binucleated and multinucleated cells
Percent of binucleated and multinucleated PEO4 and PEO1 cells after 6 days of Fasudil treatment
128 uM	6 dias
PEO4	Control	Exp 1	Exp 2	Exp 3	Average	SEM		SUMAS de 3,4,5
	1	95.0413	95.5446	97.5	96.0286	0.749893
	2	4.13223	3.46535	2.5	3.36586	0.473803		Exp 1	Exp 2	Exp 3
	3	0.826446	0	0	0.275482	0.275482	PEO4-NT	0.826446	0.990099	0
	4	0	0	0	0	0	PEO4-F	1.16279	0.947867	0.5
	5+	0	0.990099	0	0.330033	0.330033	PEO1-NT	0.401606	0	2.6
	Fasudil 128 uM	Exp 1	Exp 2	Exp 3	Average	SEM	PEO1-F	8.60215	13.5266	19.1
	1	95.7364	90.0474	97	94.2613	2.13828
	2	3.10078	9.00474	2.5	4.8685	2.07538
	3	0.775194	0	0	0.258398	0.258398
	4	0.387597	0	0	0.129199	0.129199
	5+	0	0.947867	0.5	0.482622	0.273764
PEO1	Control	Exp 1	Exp 2	Exp 3	Average	SEM
	1	93.5743	99.0148	96.3	96.2964	1.57053
	2	6.0241	0.985222	1.1	2.70311	1.66083
	3	0	0	0.5	0.166667	0.166667
	4	0.401606	0	0	0.133869	0.133869
	5+	0	0	2.1	0.7	0.7
	Fasudil 128 uM	Exp 1	Exp 2	Exp 3	Average	SEM
	1	70.9677	69.0821	56.3	65.45	4.60725
	2	20.4301	17.3913	24.6	20.8071	2.08949
	3	2.68817	3.86473	4	3.51764	0.416566
	4	2.15054	0.966184	2.5	1.87224	0.464125
	5+	3.76344	8.69565	12.6	8.35303	2.55664

## Sheet: Figure 6 E Exp 1-3 dias
Percent of metaphases
Percent of metaphases in PEO4 and PEO1 cells with multipolar spindles after 3 days of Fasudil treatment
3 dias
PEO4	Control
	Bipolares con 2 centrosomas	Bipolares con mas de 2 centrosomas	Tripolares	Tetrapolares	Mas de 4 polos	TOTAL
	85	0	3	1	0	89
% total	95.5056	0	3.37079	1.1236	0
	Fasudil 128 uM
	Bipolares con 2 centrosomas	Bipolares con mas de 2 centrosomas	Tripolares	Tetrapolares	Mas de 4 polos	TOTAL
	80	0	1	1	1	83
% total	96.3855	0	1.20482	1.20482	1.20482
PEO1	Control
	Bipolares con 2 centrosomas	Bipolares con mas de 2 centrosomas	Tripolares	Tetrapolares	Mas de 4 polos	TOTAL
	97	0	3	0	0	100
% total	97	0	3	0	0
	Fasudil 128 uM
	Bipolares con 2 centrosomas	Bipolares con mas de 2 centrosomas*	Tripolares*	Tetrapolares*	Mas de 4 polos*	TOTAL
	76	4	6	11	3	100
% total	76	4	6	11	3
*detalles		3 (3 centrosomas)	4 Tri (3 centrosomas)	10 Tetra (4 centrosomas)	1 Penta (8 centrosomas)
		1 (4 centrosomas)	2 Tri (4 centrosomas)	1 Tetra (6 centrosomas)	2 Penta (5 centrosomas)

## Sheet: Figure 6 E Exp 2-3 dias
Percent of metaphases
Percent of metaphases in PEO4 and PEO1 cells with multipolar spindles after 3 days of Fasudil treatment
3 dias
PEO4	Control
	Bipolares con 2 centrosomas	Bipolares con mas de 2 centrosomas	Tripolares	Tetrapolares	Mas de 4 polos	TOTAL
	95	0	4	1	0	100
% total	95	0	4	1	0
	Fasudil 96 uM
	Bipolares con 2 centrosomas	Bipolares con mas de 2 centrosomas	Tripolares	Tetrapolares	Mas de 4 polos	TOTAL
	93	0	2	5	0	100
% total	93	0	2	5	0
PEO1	Control
	Bipolares con 2 centrosomas	Bipolares con mas de 2 centrosomas	Tripolares	Tetrapolares	Mas de 4 polos	TOTAL
	97	0	2	1		100
% total	97	0	2	1	0
	Fasudil 96 uM
	Bipolares con 2 centrosomas	Bipolares con mas de 2 centrosomas*	Tripolares*	Tetrapolares*	Mas de 4 polos*	TOTAL
	56	1	6	5	4	72
% total	77.7778	1.38889	8.33333	6.94444	5.55556
*detalles		Tri (5, 3, 3, 3, 3, 3)
		Tetra (4, 5, 4, 4, 4)
		Pseudo (3)
		Multi (6, 6, 6)

## Sheet: Figure 6 E Exp 3-3 dias
Percent of metaphases
Percent of metaphases in PEO4 and PEO1 cells with multipolar spindles after 3 days of Fasudil treatment
3 dias
PEO4	Control
	Bipolares con 2 centrosomas	Bipolares con mas de 2 centrosomas	Tripolares	Tetrapolares	Mas de 4 polos	TOTAL
	94	0	1	4	1	100
% total	94	0	1	4	1
	Fasudil 96 uM
	Bipolares con 2 centrosomas	Bipolares con mas de 2 centrosomas	Tripolares	Tetrapolares	Mas de 4 polos	TOTAL
	93	0	4	1	2	100
% total	93	0	4	1	2
PEO1	Control
	Bipolares con 2 centrosomas	Bipolares con mas de 2 centrosomas	Tripolares	Tetrapolares	Mas de 4 polos	TOTAL
	92	1	5	1	1	100
% total	92	1	5	1	1
	Fasudil 96 uM
	Bipolares con 2 centrosomas	Bipolares con mas de 2 centrosomas*	Tripolares*	Tetrapolares*	Mas de 4 polos*	TOTAL
	64	2	12	9	13	100
% total	64	2	12	9	13

## Sheet: Figure 6 F Exp1-6 dias
Percent of metaphase
Percent of metaphase in PEO4 and PEO1 cells with multipolar spindles after 6 days of Fasudil treatment
6 dias
	PEO4-NT
	Bipolares con 2 centrosomas	Bipolares con mas de 2 centrosomas	Tripolares	Tetrapolares	Mas de 4 polos	TOTAL
	89	0	1	2	1	93
% total	96.7391	0	1.08696	2.17391	1.08696
	PEO4-Fasudil 128 uM
	Bipolares con 2 centrosomas	Bipolares con mas de 2 centrosomas	Tripolares	Tetrapolares	Mas de 4 polos	TOTAL
	59	0	4	3	1	67
% total	88.0597	0	5.97015	4.47761	1.49254
	PEO1-NT
	Bipolares con 2 centrosomas	Bipolares con mas de 2 centrosomas	Tripolares	Tetrapolares	Mas de 4 polos	TOTAL
	97	0	1	1	1	100
% total	97	0	1	1	1
	PEO1-Fasudil 128 uM
	Bipolares con 2 centrosomas	Bipolares con mas de 2 centrosomas*	Tripolares	Tetrapolares	Mas de 4 polos	TOTAL
	9	1	2	3	3	18
% total	50	5.55556	11.1111	16.6667	16.6667
	*detalles	Bipolar (4 centro) 1	Tripolar (3 centro) 2	Tetrapolar (4 centro) 3	Multipolar (6, 8 y 10+ centro)

## Sheet: Figure 6  F Exp2-6 dias
Percent of metaphase
Percent of metaphase in PEO4 and PEO1 cells with multipolar spindles after 6 days of Fasudil treatment
6 dias
PEO4	Control
	Bipolares con 2 centrosomas	Bipolares con mas de 2 centrosomas	Tripolares	Tetrapolares	Mas de 4 polos	TOTAL
	98	0	1	1	0	100
% total	98	0	1	1	0
	Fasudil 96 uM
	Bipolares con 2 centrosomas	Bipolares con mas de 2 centrosomas	Tripolares	Tetrapolares	Mas de 4 polos	TOTAL
	93	0	4	2	1	100
% total	93	0	4	2	1
PEO1	Control
	Bipolares con 2 centrosomas	Bipolares con mas de 2 centrosomas	Tripolares	Tetrapolares	Mas de 4 polos	TOTAL
	99	0	1		0	100
% total	99	0	1	0	0
	Fasudil 96 uM
	Bipolares con 2 centrosomas	Bipolares con mas de 2 centrosomas*	Tripolares	Tetrapolares	Mas de 4 polos	TOTAL
	20	2	0	1	2	25
% total	80	8	0	4	8
	*detalles	Bipolar (3, 4)		Tetrapolar (4 centro) 3	Multipolar (8 y 10+ centro)
