# Supplementary material for: Inhibitors of Rho kinases (ROCK) induce multiple mitotic defects and synthetic lethality in BRCA2-deficient cells
Source: eLife journal article supplement (doi:10.7554/elife.80254), 2023-04-19
Supplement: supp [file Figure 7- figure supplement 1- source data 1.xlsx]

## Sheet: Figure 7- figure supplement 1 
Relative cell number (%) of PEO4 and PEO1 cells at 6 days after treatment with different doses of Fasudil
	Well	Count									Well	Count
			Exp 1
	Nuclei		PEO
Well	Nuc Area	Cell Count			NT	1	2	3	4	5	6	7
				PEO4	13508	6965	999	398	173	115			Cell Count
B - 2	125.998	13508			11832	7092	1110	600	172	115			Cell Count		E - 2	12814
B - 3	119.88	13813			14921	4376	2107	820	250	156			Cell Count		E - 3	13839
B - 4	122.89	12672			13813										E - 4	14817
B - 5	146.974	6965			13417										E - 5	1190
B - 6	149.796	999			13593										E - 6	181
B - 7	131.525	398			12672										E - 7	153
B - 8	119.328	173			12707										E - 8	130
B - 9	94.49	115			12941										E - 9	85
B - 10	117.564	12263			12263										E - 10	13468
B - 11	117.872	12023			11738										E - 11	13698
C - 2	123.918	11832			13184										F - 2	13440
C - 3	119.297	13417			12023										F - 3	15859
C - 4	119.476	12707			12059										F - 4	16797
C - 5	147.923	7092			14360										F - 5	878
C - 6	152.537	1110		PEO1	12814	1190	181	153	130	85			Cell Count		F - 6	153
C - 7	138.141	600			13440	878	153	183	134	158			Cell Count		F - 7	183
C - 8	120.921	172			14139	1583	211	167	136	134			Cell Count		F - 8	134
C - 9	127.444	115			13839										F - 9	158
C - 10	111.696	11738			15859										F - 10	15342
C - 11	118.768	12059			15241										F - 11	15183
D - 2	119.067	14921			14817										G - 2	14139
D - 3	119.324	13593			16797										G - 3	15241
D - 4	122.671	12941			17196										G - 4	17196
D - 5	139.605	4376			13468										G - 5	1583
D - 6	175.285	2107			15342										G - 6	211
D - 7	147.797	820			16348										G - 7	167
D - 8	125.084	250			13698										G - 8	136
D - 9	127.581	156			15183										G - 9	134
D - 10	117.236	13184			15169										G - 10	16348
D - 11	115.764	14360													G - 11	15169
EXP2
Well	Cell Count	PEO4	NT		NT		NT		1		2		3		4		5		NT		NT
			10082		9575		6677		10270	86.0844		0		0		0		0				E - 2	14689
B - 2	10082		13005		12666		12244		12983	108.825	1989	16.672	851	7.13319	458	3.83901	223	1.86921	13179		13179	E - 3	13075
B - 3	9575		12855		12166		14238		9342	78.3058	1320	11.0644	531	4.45091	221	1.85245	215	1.80216	12613		12613	E - 4	14074
B - 4	6677	Promedio	11930.2						78.3058		11.0644		4.45091		1.85245		1.80216					E - 5	1157
B - 5	10270																					E - 6	232
B - 6	9342	PEO1	NT		NT		NT		1		2		3		4		5		NT		NT	E - 7	176
B - 7	8857		14689		13075		14074		1157	8.8259	232	1.76976	176	1.34257	133	1.01456	162	1.23578	13575		13253	E - 8	133
B - 8	6437		15520		15379		16155		1175	8.96321	229	1.74687	277	2.11303	199	1.51802	180	1.37309	16327		15895	E - 9	162
B - 9	7115		10244		9438		10268		523	3.98958	160	1.22052	137	1.04507	130	0.991674		0			5636	E - 10	13575
B - 10	5553	Promedio	13109.1						3.98958		1.22052		1.04507		0.991674		0					E - 11	13253
B - 11	9504																					F - 2	15520
C - 2	13005																					F - 3	15379
C - 3	12666																					F - 4	16155
C - 4	12244																					F - 5	1175
C - 5	12983																					F - 6	229
C - 6	1989																					F - 7	277
C - 7	851																					F - 8	199
C - 8	458																					F - 9	180
C - 9	223																					F - 10	16327
C - 10	13179																					F - 11	15895
C - 11	12556																					G - 2	10244
D - 2	12855																					G - 3	9438
D - 3	12166																					G - 4	10268
D - 4	14238																					G - 5	523
D - 5	9342																					G - 6	160
D - 6	1320																					G - 7	137
D - 7	531																					G - 8	130
D - 8	221																					G - 9	95
D - 9	215																					G - 10	5675
D - 10	12613																					G - 11	5636
D - 11	12738

## Sheet: Figure 7- figure supplement 1 B
Percent of binucleated PEO4 cells treated with different doses of Fasudil
Exp1
Celulas	Tratamiento	mono	binucleadas	multi		Suma	Promedio binucleadas
PEO4	128	304	8	2		314	2.54777
PEO4	198	335	8	3		346	2.31214
PEO4	NT	310	7	0		317	2.2082
PEO4	256	323	11	0		334	3.29341
PEO4	356	225	4	0		229	1.74672
PEO1	NT	258	6	7	1	271	2.21402
PEO1	128	250	26	4		280	9.28571
Exp2
Celulas	Tratamiento	mono	binucleadas	multi		Suma	Promedio binucleadas
PEO4	NT	303	5	0		308	1.62338
PEO4	128	350	4	5		359	1.11421
PEO4	198	324	1	1		326	0.306748
PEO4	256	322	7	1		330	2.12121
PEO4	356	292	5	1		298	1.67785
PEO1	NT	289	7	6	1	302	2.31788
PEO1	128	268	37	11		316	11.7089
