# Supplementary material for: Inhibitors of Rho kinases (ROCK) induce multiple mitotic defects and synthetic lethality in BRCA2-deficient cells
Source: eLife journal article supplement (doi:10.7554/elife.80254), 2023-04-19
Supplement: supp [file Figure 7- source data 1.xlsx]

## Sheet: Figure 7 A
Percent of binucleated PEO1 and PEO4 cells
Percent of binucleated PEO1 and PEO4 cells treated with Fasudil at the indicated time points after treatment
Exp1
Celulas	Tratamiento	mono	binucleadas	multi		Suma	Promedio binucleadas
PEO4	128	304	8	2		314	2.54777
PEO4	198	335	8	3		346	2.31214
PEO4	NT	310	7	0		317	2.2082
PEO4	256	323	11	0		334	3.29341
PEO4	356	225	4	0		229	1.74672
PEO1	NT	258	6	7	1	271	2.21402
PEO1	128	250	26	4		280	9.28571
Exp2
Celulas	Tratamiento	mono	binucleadas	multi		Suma	Promedio binucleadas
PEO4	NT	303	5	0		308	1.62338
PEO4	128	350	4	5		359	1.11421
PEO4	198	324	1	1		326	0.306748
PEO4	256	322	7	1		330	2.12121
PEO4	356	292	5	1		298	1.67785
PEO1	NT	289	7	6	1	302	2.31788
PEO1	128	268	37	11		316	11.7089

## Sheet: Figure 7 B
Percent of aberrant anaphases in PEO1 and PEO4 cells treated with Fasudil at the indicated time points after treatment
PEO1
Exp1
		Binucleadas	Mono	Multi	Bridge	Lagging	Anafases normales		Totales Anafase	%Bridge	%Lagging		Totales nucleos	%Binucleadas	%multinucleadas
	NT	5	190	0	4	1	54		59	6.77966	1.69492		195	2.5641	0
	24 hs	32	273	0	3	2	35		40	7.5	5		305	10.4918	0
	48 hs	60	286	12	13	1	18		32	40.625	3.125		358	16.7598	3.35196
	72 hs	57	174	13	12	3	17		32	37.5	9.375		244	23.3607	5.32787
PEO4		Binucleadas	Mono	Multi	Bridge	Lagging	Anafases normales		Totales Anafase	%Bridge	%Lagging		Totales nucleos	%Binucleadas	%multinucleadas
	NT	2	220	0	3	1	41		45	6.66667	2.22222		222	0.900901	0
	24 hs	5	233	1	3	1	30		34	8.82353	2.94118		239	2.09205	0.41841
	48 hs	10	246	2	2	0	26		28	7.14286	0		258	3.87597	0.775194
	72 hs	9	310	2	2	1	26		29	6.89655	3.44828		321	2.80374	0.623053
Exp2
	MONO	Binucleadas	Multinucleadas
PEO1					total	% Binucleadas	%multinucleadas
24	317	28	0		345	8.11594	0
48	301	58	6		365	15.8904	1.64384
72	263	52	20		335	15.5224	5.97015
NT	382	5	0		387	1.29199	0
PEO4
24	291	5	0		296	1.68919	0
48	307	9	3		319	2.82132	0.940439
72	342	12	2		356	3.37079	0.561798
NT	311	3	0		314	0.955414	0
Percent of aberrant anaphases in PEO1 and PEO4 cells treated with Fasudil at the indicated time points after treatment
PEO1
		Binucleadas	Mono	Multi	Bridge	Lagging	Anafases normales		Totales Anafase	%Bridge	%Lagging		Totales nucleos	%Binucleadas	%multinucleadas
	NT	5	241	0	1	0	23		24	4.16667	0		246	2.03252	0
	24 hs	43	254	5	4	1	45		50	8	2		302	14.2384	1.65563
	48 hs	29	150	18	9	1	20		30	30	3.33333		197	14.7208	9.13706
	72 hs	34	173	27	11	1	14		26	42.3077	3.84615		#REF!	#REF!	#REF!
PEO4		Binucleadas	Mono	Multi	Bridge	Lagging	Anafases normales		Totales Anafase	%Bridge	%Lagging		Totales nucleos	%Binucleadas	%multinucleadas
	NT	3	266	0	2	2	44		48	4.16667	4.16667
	24 hs	6	275	1	2	1	35		38	5.26316	2.63158
	48 hs	6	250	1	3	0	30		33	9.09091	0
	72 hs	8	266	2	3	3	35		41	7.31707	7.31707

## Sheet: Figure 7 C 
exp 1
Percent of mitotic aberrations in PEO1 and PEO4 cells treated with Fasudil at the indicated time points after treatment
mitotic aberrations
PEO1
		Mitosis normal	Anormales	total			% Mitosis aberrantes
	NT	106	4	110			3.63636
	24 hs	90	5	95			5.26316
	48 hs	41	20	61			32.7869
	72 hs	37	23	60			38.3333
PEO4		Mitosis normal	Anormales	total			% Mitosis aberrantes
	NT	100	5	105			4.7619
	24 hs	92	6	98			6.12245
	48 hs	78	4	82			4.87805
	72 hs	82	6	88			6.81818
Percent of mitotic aberrations in PEO1 and PEO4 cells treated with Fasudil at the indicated time points after treatment
exp2
Aberraciones mitoticas
PEO1
		Mitosis normal	Metafases normales	Anormales		total	% Mitosis aberrantes
	NT	63	28	3		94	3.19149
	24 hs	177	46	5		228	2.19298
	48 hs	57	23	23		103	22.3301
	72 hs	39	10	16		65	24.6154
PEO4
	NT	42	24	2		68	2.94118
	24 hs	46	36	4		86	4.65116
	48 hs	27	26	4		57	7.01754
	72 hs	50	22	7		79	8.86076
