# Supplementary material for: Inhibitors of Rho kinases (ROCK) induce multiple mitotic defects and synthetic lethality in BRCA2-deficient cells
Source: eLife journal article supplement (doi:10.7554/elife.80254), 2023-04-19
Supplement: supp [file Figure 8- figure supplement 1- source data 1.xlsx]

## Sheet: Figure 8- figure supplement 1 A
Relative cell number (%) of shScramble and shBRCA2 HCT116p21-/- cells at 6 days after transfection with siCITK or siROCK (1+2)
Well	Cell Count			Exp 2						Well	Cell Count	Exp 1
				HCT116
B - 2	15054				siLUC	siCITK	siROCK1+2			B - 3	12016			siLUC	siCITK	siROCK1+2
B - 3	9988			WT	14352	13262	13928	Cell Count		B - 4	15360		WT	12016	15360	16472	Cell Count
B - 4	8995				13972	16427	10925	Cell Count		B - 5	16472			12296	11736	16968	Cell Count
C - 2	17116				11967	13774	12630	Cell Count		C - 3	12296			12712	12968	17272	Cell Count
C - 3	11028			shBRCA2	15054	9988	8995	Cell Count		C - 4	11736		shBRCA2	15672	10080	13440	Cell Count
C - 4	9617				17116	11028	9617	Cell Count		C - 5	16968				10640	12232	Cell Count
D - 2	16917				16917	11290	12269	Cell Count		D - 3	12712			16072	12216	12224	Cell Count
D - 3	11290									D - 4	12968
D - 4	12269									D - 5	17272
E - 2	14352									E - 3	15672
E - 3	13262				siLUC	siCITK	siROCK1+2			E - 4	10080			siLUC	siCITK	siROCK1+2
E - 4	13928			WT	13430.3	14487.7	12494.3	Promedio		E - 5	13440		WT	12341.3	13354.7	16904	Promedio
F - 2	13972				1281.45	1698.91	1506.09	D.S.		F - 3				350.208	1842.68	403.822	D.S.
F - 3	16427			shBRCA2	16362.3	10768.7	10293.7	Promedio		F - 4	10640		shBRCA2	15872	10978.7	12632	Promedio
F - 4	10925				1137.41	688.652	1738.73	D.S.		F - 5	12232			282.843	1107.54	699.76	D.S.
G - 2	11967									G - 3	16072
G - 3	13774									G - 4	12216
G - 4	12630				siLUC	siCITK	siROCK1+2			G - 5	12224			siLUC	siCITK	siROCK1+2
				WT	100	107.873	93.0307						WT	100	108.211	136.971
					9.54144	12.6498	11.2141							2.83768	13.798	2.38891
				shBRCA2	100	65.8138	62.9108						shBRCA2	100	69.17	79.5867
					6.95139	4.20876	10.6264							1.78202	6.97795	4.40877

## Sheet: Figure 8- figure supplement 1 B
	Relative cell number (%) of shScramble and shBRCA2 HCT116p21-/- cells at 6 days after transfection with siEMI1
EXP1
		100 nm
Well	Cell Count					LUC Fasudil							EMI1 Fasudil
				LUC		32		64			EMI1		32		64
B - 2	2450		SCR																		E - 2	4840
B - 3	3988		b	2450	52.6995	3988	85.7819	4282	92.1058		16092	95.7145	11947	71.0602	11329	67.3844					E - 3	4825
B - 4	4282		c	6848	147.3	5348	115.035	5679	122.155		17533	104.286	12400	73.7546	11429	67.9792					E - 4	3943
B - 5	2708		d		0	4226	90.9013	4075	87.6533			0	11793	70.1442	10104	60.0981					E - 5	582
B - 6	1584			4649		4520.67		4678.67			16812.5		12046.7		10954						E - 6	261
B - 7	16092			100		97.2395		100.638			100		71.653		65.1539						E - 7	3577
B - 8	11947																				E - 8	3018
B - 9	11329																				E - 9	2715
B - 10	4831																				E - 10	334
B - 11	1560																				E - 11	227
C - 2	6848																				F - 2	7699
C - 3	5348		BRCA2			LUC Fasudil							EMI1 Fasudil								F - 3	2372
C - 4	5679			LUC		32		64			EMI1		32		64						F - 4	3111
C - 5	3210																				F - 5	684
C - 6	2768		e	4840	77.1991	4825	76.9599	3943	62.8918		3577	107.272	3018	90.5083	2715	81.4215					F - 6	309
C - 7	17533		f	7699	122.801			3111	49.6212		3092	92.7275		0		0					F - 7	3092
C - 8	12400		g		0	5113	81.5536	3090	49.2862			0	3303	99.0553	2496	74.8538					F - 8	938
C - 9	11429			6269.5		4969		3381.33			3334.5		3160.5		2605.5						F - 9	430
C - 10	5300			100		79.2567		53.9331			100		94.7818		78.1377						F - 10	147
C - 11	2822																				F - 11	136
D - 2	60																				G - 2	40
D - 3	4226																				G - 3	5113
D - 4	4075																				G - 4	3090
D - 5	5255																				G - 5	810
D - 6	2269																				G - 6	409
D - 7	42																				G - 7	45
D - 8	11793																				G - 8	3303
D - 9	10104																				G - 9	2496
D - 10	5039																				G - 10	131
D - 11	1595																				G - 11	244
EXP2
SCR	Nuclei						LUC Fasudil										EMI1 Fasudil								BRCA2
Well	Nuc Area	Cell Count			0		1		2		3		4		0		1		2		3		4		Well	Cell Count
				SCR	2		3		4		5		6		7		8		9		10		11
B - 2	207.998	7249		b	7249	103.321	8223	117.204	8682	123.746	7926	112.97	8641	123.161	9218	84.0087			8636	78.7047	7623	69.4726	6342	57.7982	E - 2	4970
B - 3	208.216	8223		c	6955	99.1306	9797	139.638		0	10679	152.209	9253	131.884	11069	100.878	11512	104.915	11783	107.385	8556	77.9756	7919	72.1702	E - 3	6319
B - 4	210.908	8682		d	6844	97.5485	7874	112.229	7658	109.151	10094	143.871		0	12631	115.113	10352	94.3435	18138	165.302		0		0	E - 4	6039
B - 5	212.568	7926			7016		8631.33		8170		9566.33		8947		10972.7		10932		12852.3		8089.5		7130.5		E - 5	5760
B - 6	215.832	8641			100		123.024		116.448		136.35		127.523		100		99.6294		117.13		73.7241		64.9842		E - 6	4619
B - 7	196.075	9218																							E - 7	7925
B - 8	201.783	8106																							E - 8	8725
B - 9	201.349	8636																							E - 9	8866
B - 10	211.502	7623																							E - 10	5911
B - 11	215.078	6342																							E - 11	4689
C - 2	199.445	6955		BRCA2			LUC Fasudil										EMI1 Fasudil								F - 2	6509
C - 3	201.761	9797			LUC		1		2		3		4		LUC		1		2		3		4		F - 3	6722
C - 4	206.516	10251			2		3		4		5		6		7		8		9		10		11		F - 4	8015
C - 5	205.033	10679		e		0	6319	86.9368	6039	83.0845	5760	79.2461	4619	63.5482	7925	86.6168	8725	95.3604	8866	96.9015	5911	64.6046	4689	51.2487	F - 5	7095
C - 6	209.835	9253		f	6509	89.5508	6722	92.4813		0		0		0	10374	113.383	10890	119.023	8545	93.3931	6815	74.4849	4872	53.2488	F - 6	5449
C - 7	195.558	11069		g	8028	110.449		0	6998	96.2785	3545	48.7721	3259	44.8373		0	8433	92.169		0		0		0	F - 7	10374
C - 8	203.176	11512			7268.5		6520.5		6518.5		4652.5		3939		9149.5		9349.33		8705.5		6363		4780.5		F - 8	10890
C - 9	199.256	11783			100		89.709		89.6815		64.0091		54.1927		100		102.184		95.1473		69.5448		52.2488		F - 9	8545
C - 10	209.215	8556																							F - 10	6815
C - 11	216.205	7919																							F - 11	4872
D - 2	198.67	6844																							G - 2	8028
D - 3	206.228	7874																							G - 3	9430
D - 4	204.987	7658																							G - 4	6998
D - 5	205.987	10094																							G - 5	3545
D - 6	193.604	17710																							G - 6	3259
D - 7	190.152	12631																							G - 7	20964
D - 8	203.248	10352																							G - 8	8433
D - 9	187.843	20138																							G - 9	7180
D - 10	191.981	45																							G - 10	5874
D - 11	212.425	58																							G - 11	4202
