# Supplementary figures and images for: Inhibitors of Rho kinases (ROCK) induce multiple mitotic defects and synthetic lethality in BRCA2-deficient cells
Source: eLife journal article supplement (doi:10.7554/elife.80254), 2023-04-19

# Figure 2- figure supplement 2

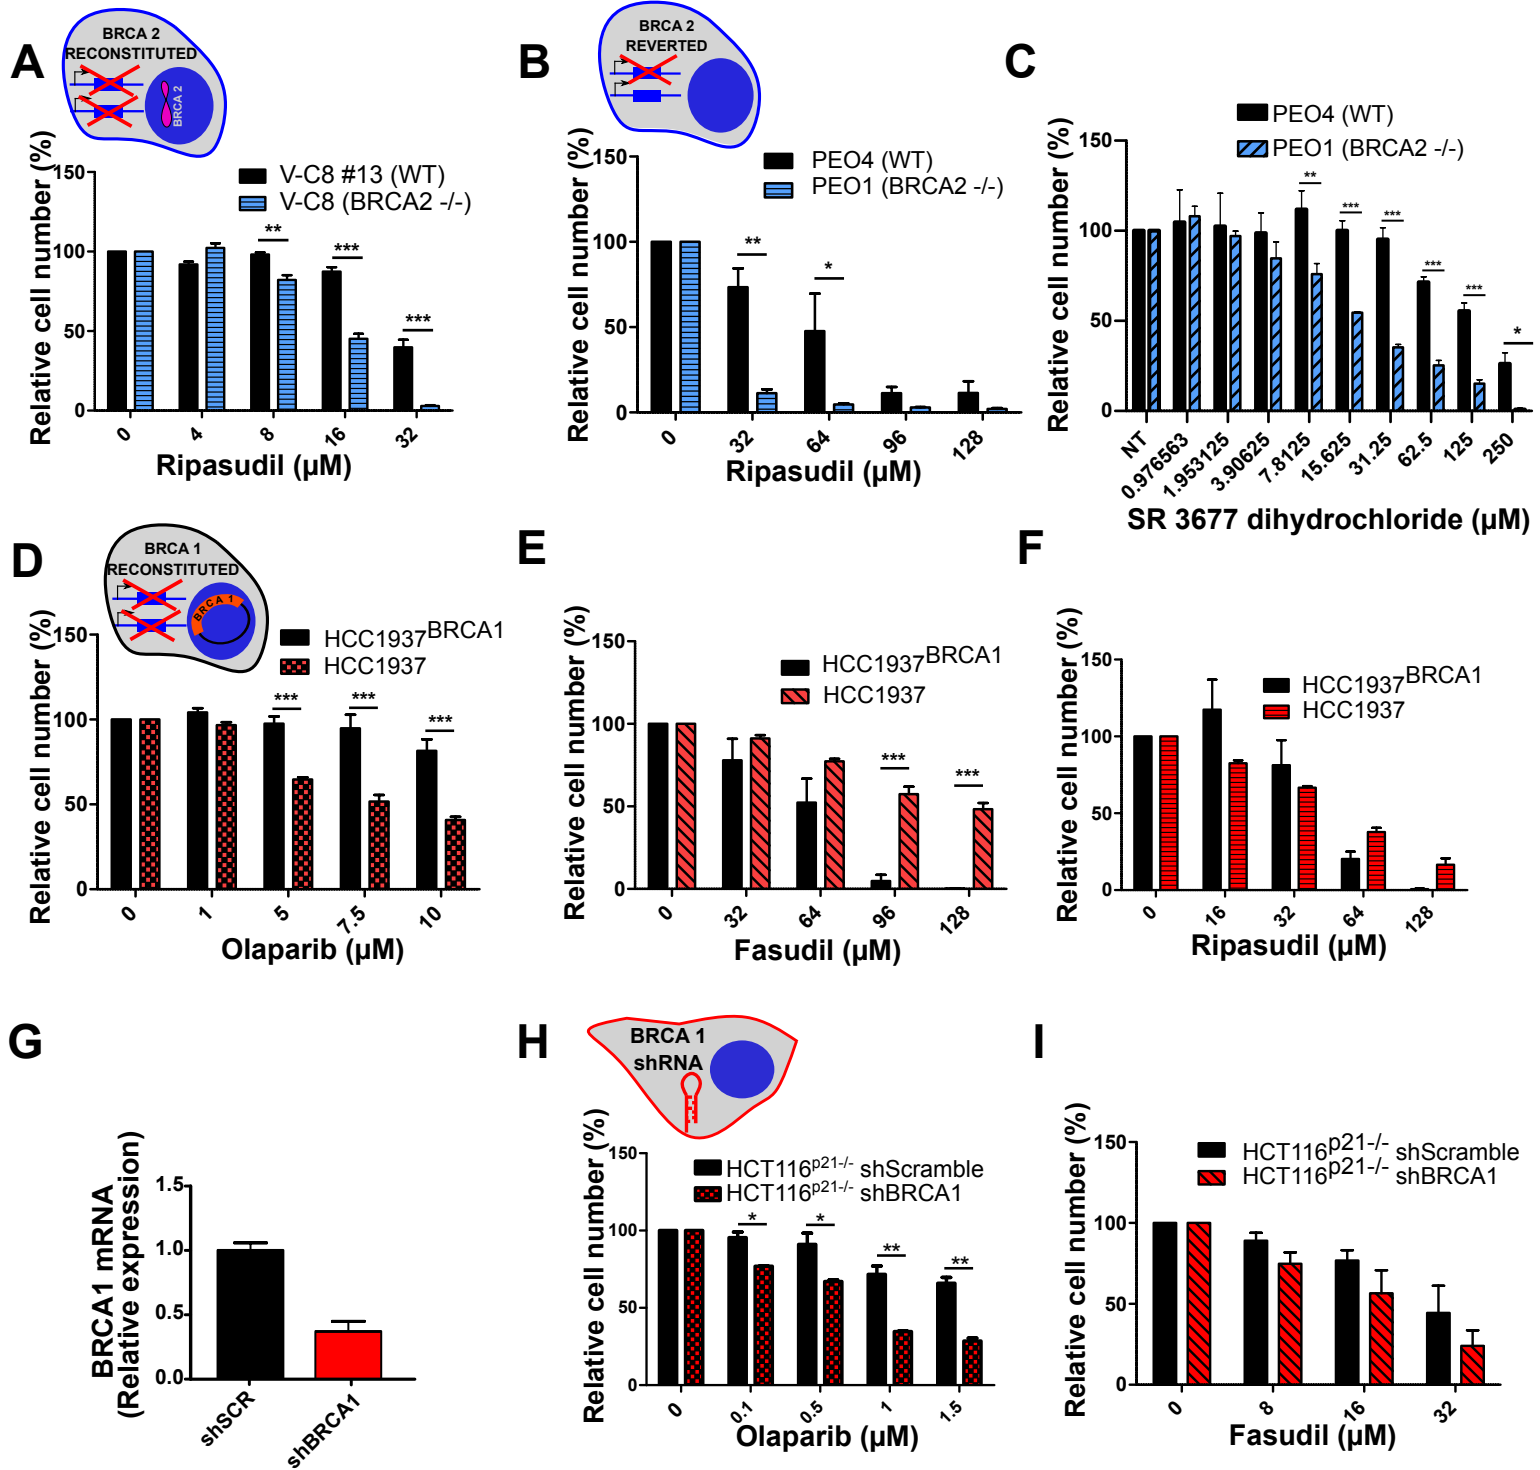

Supplement: supp [file elife-80254-supp-v1.zip]

# Figure 3-figure supplement 1

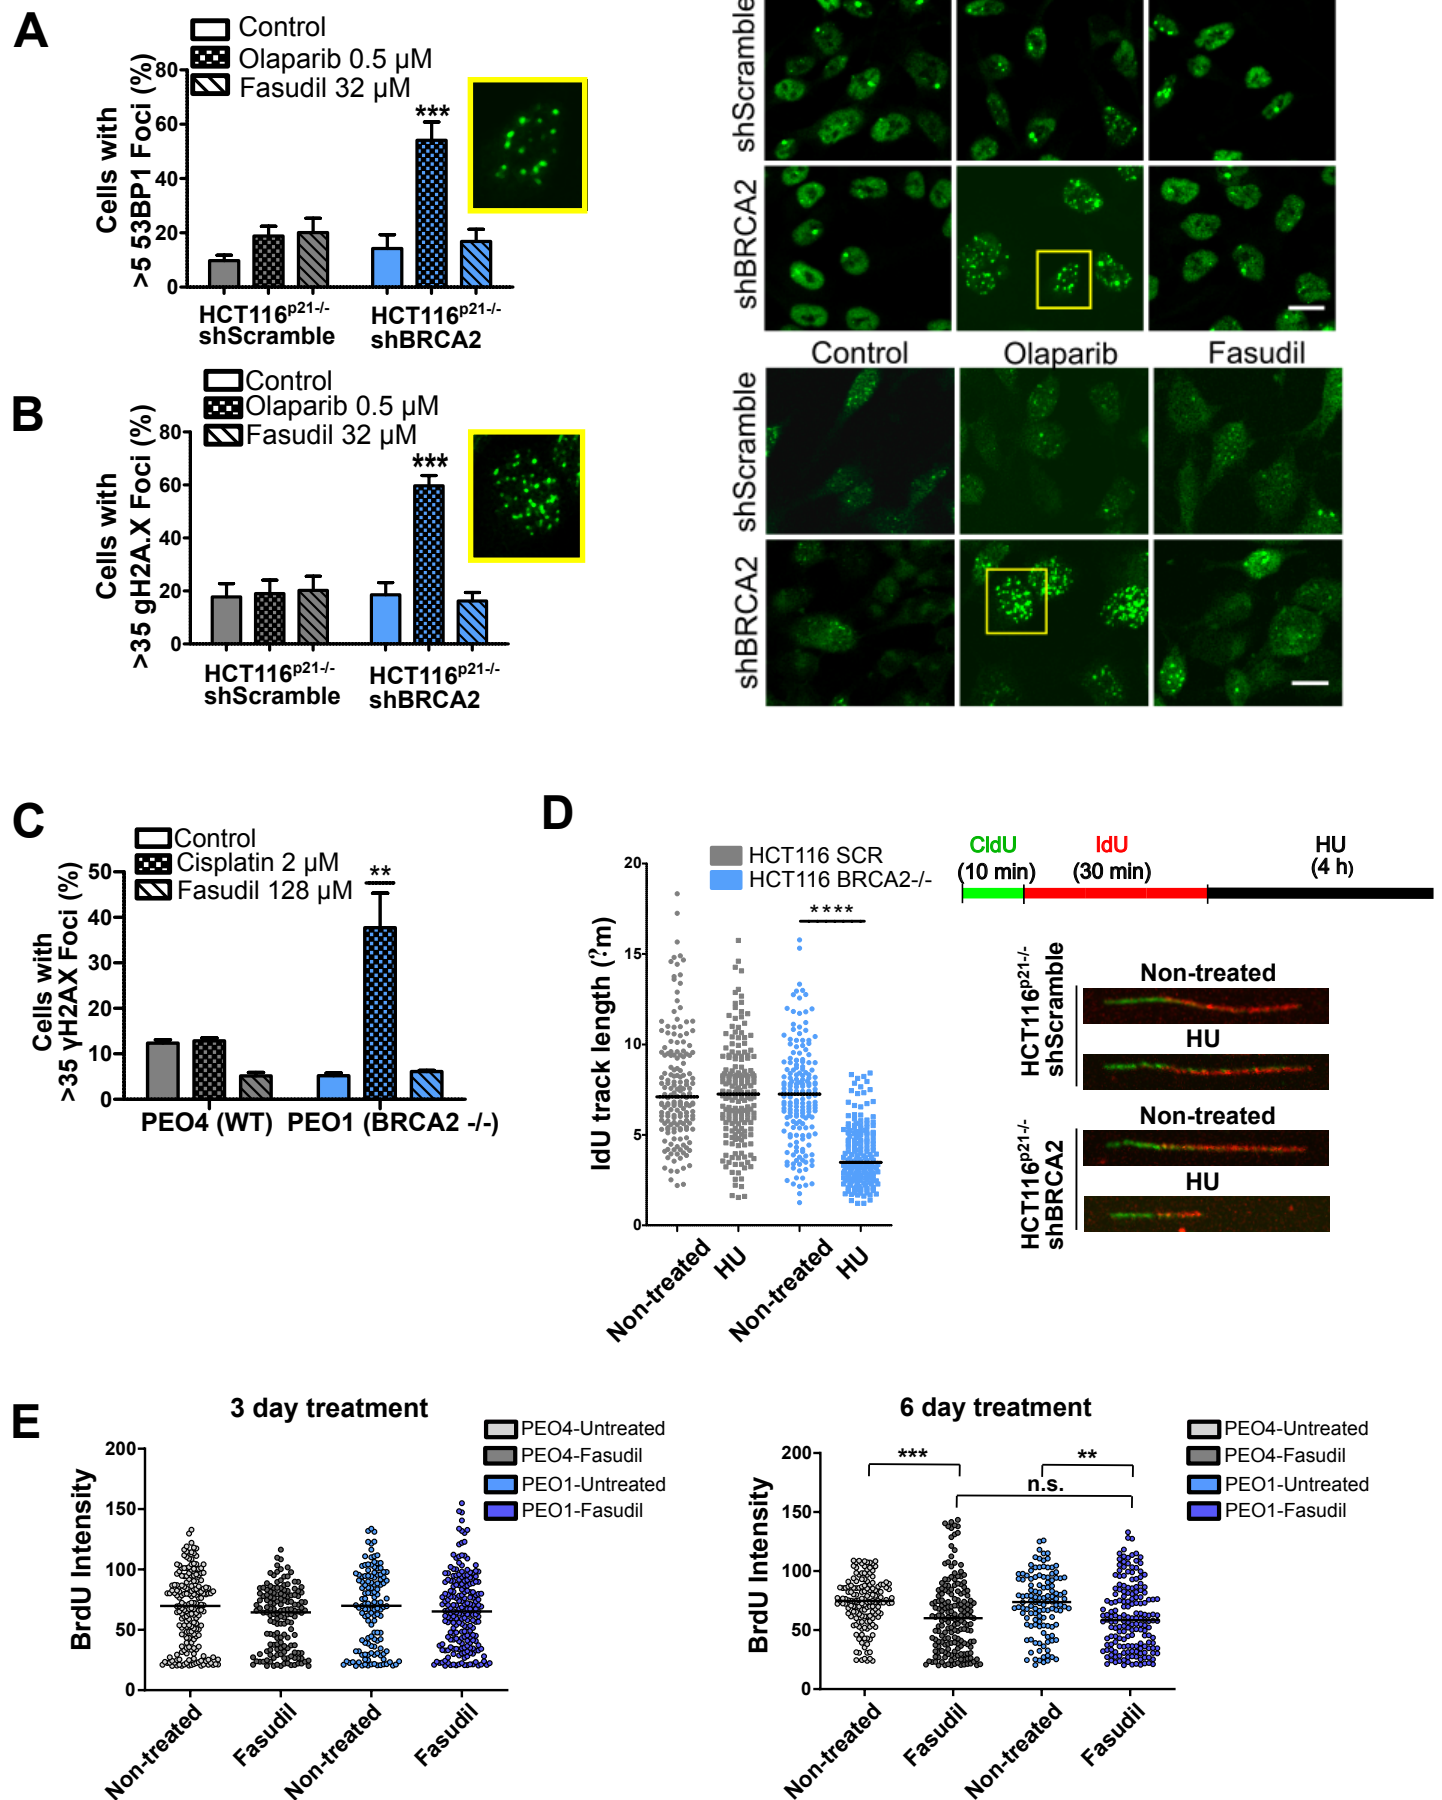

Supplement: supp [file elife-80254-supp-v1.zip]

Figure 8- figure supplement 1

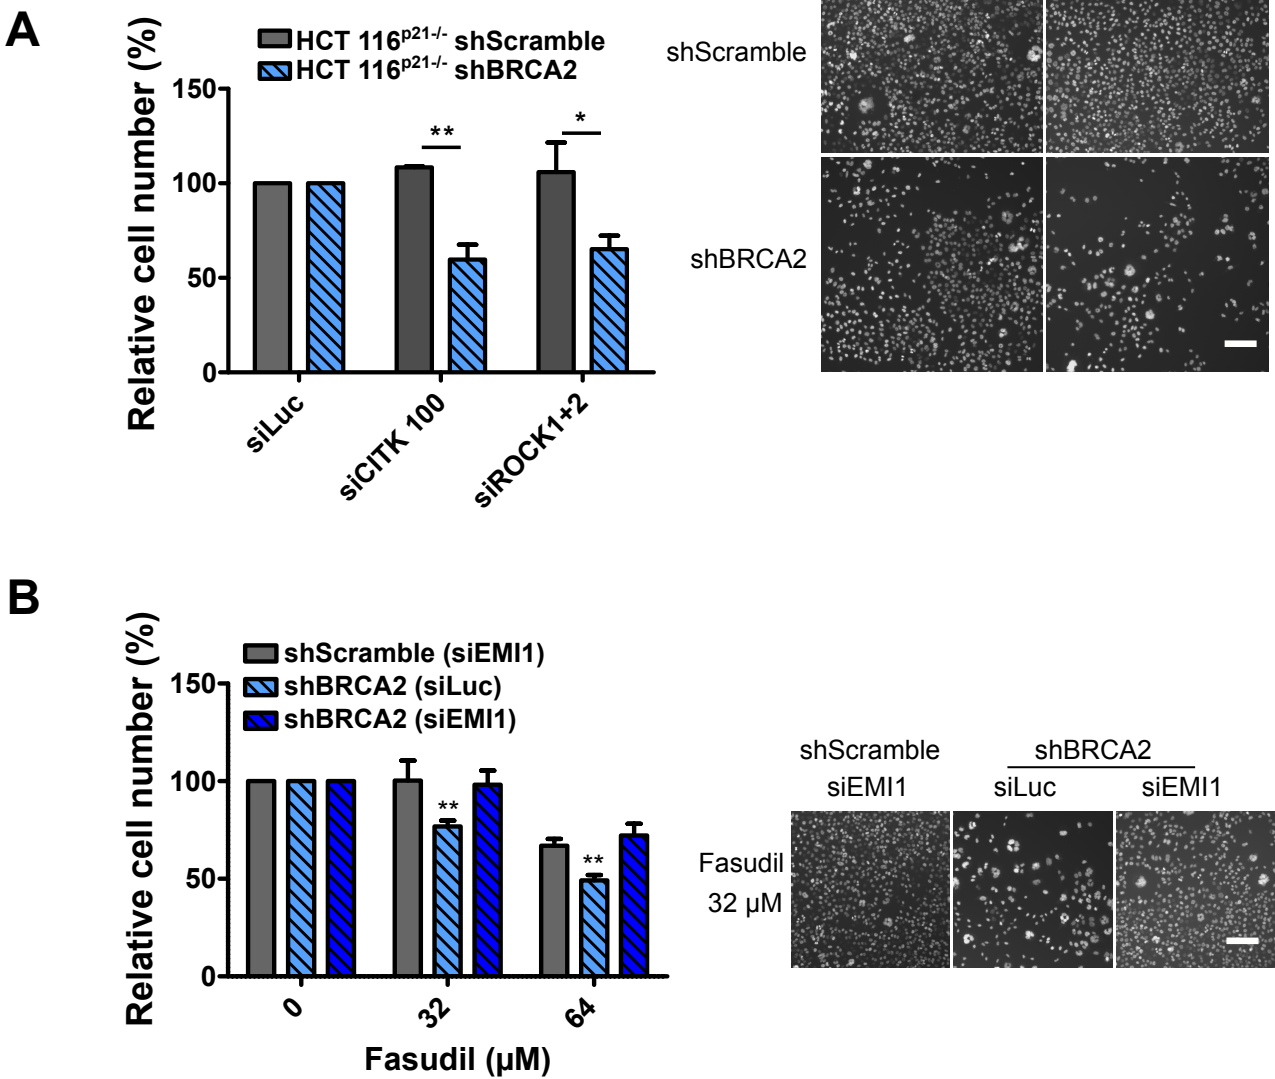

Supplement: supp [file elife-80254-supp-v1.zip]

Figure 6 - figure supplement 1

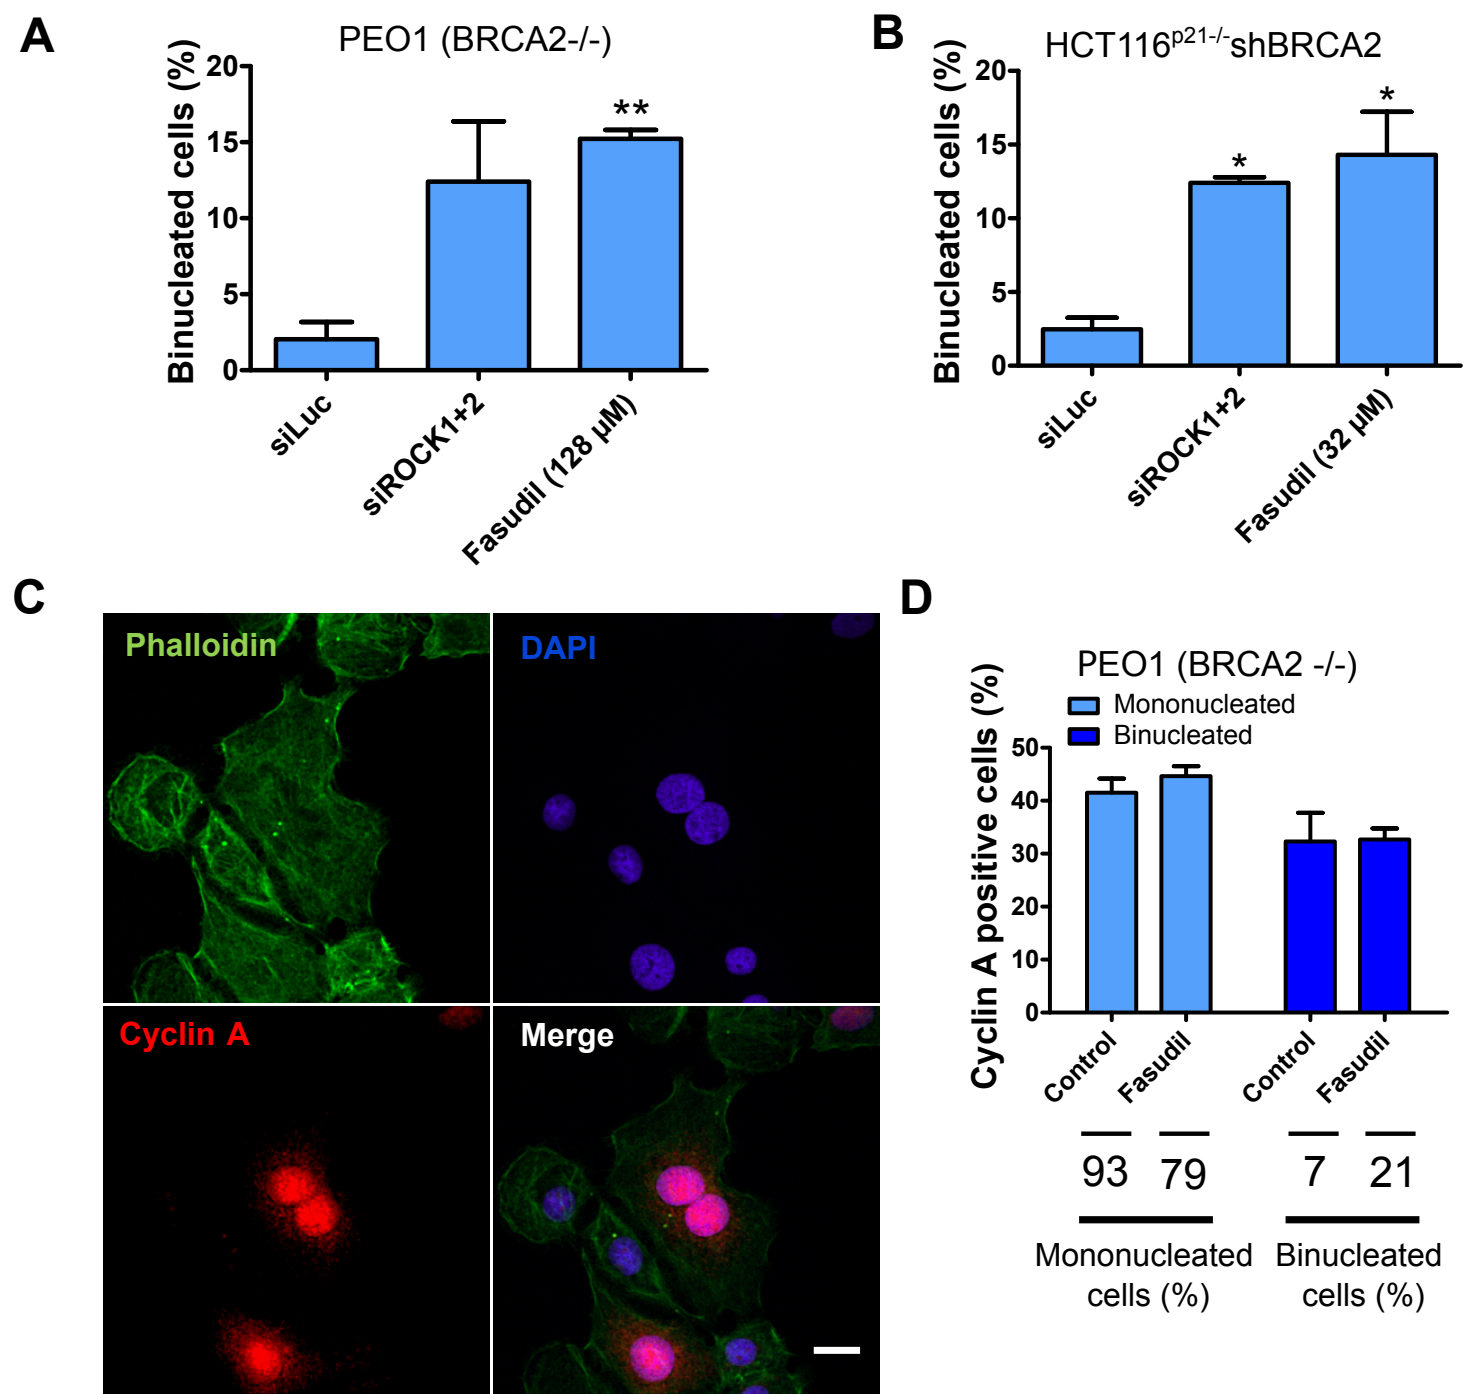

Supplement: supp [file elife-80254-supp-v1.zip]

# Figure 2- figure supplement 1

A

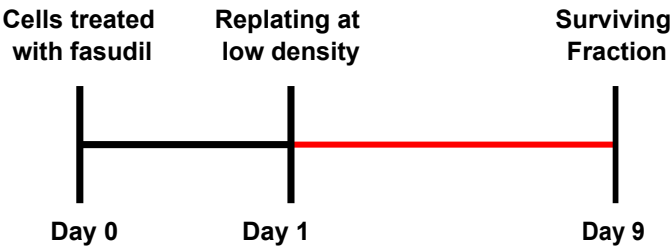

B

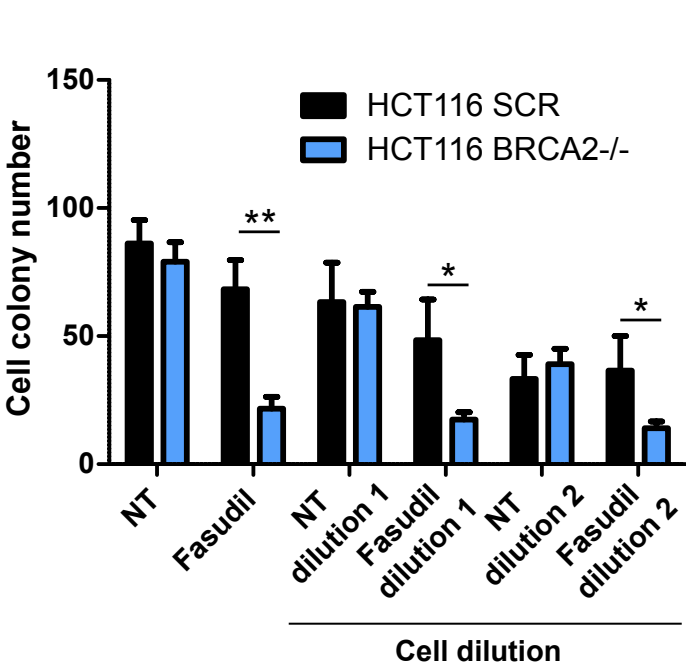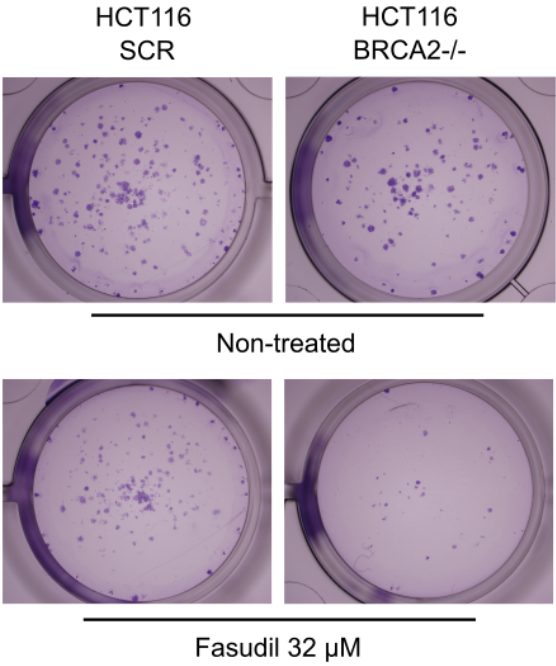

Supplement: supp [file elife-80254-supp-v1.zip]

# Figure 3-figure supplement 2

**A)**

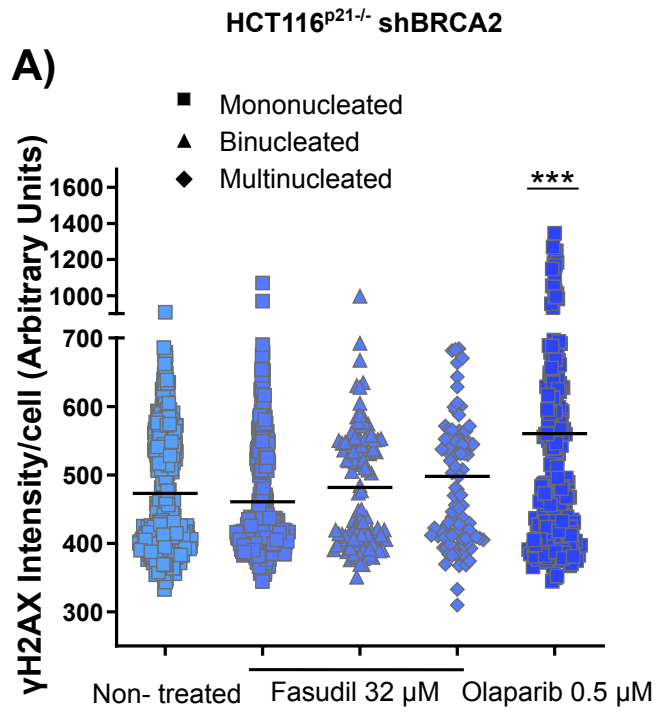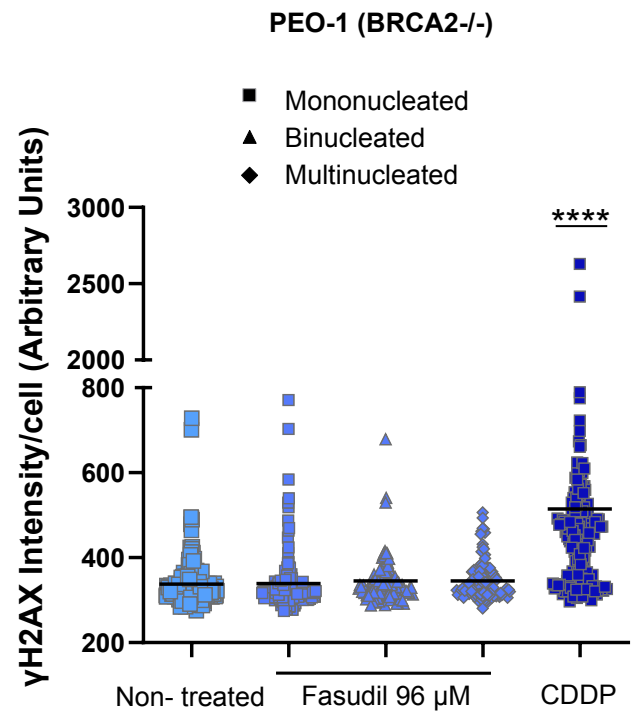

**B)**

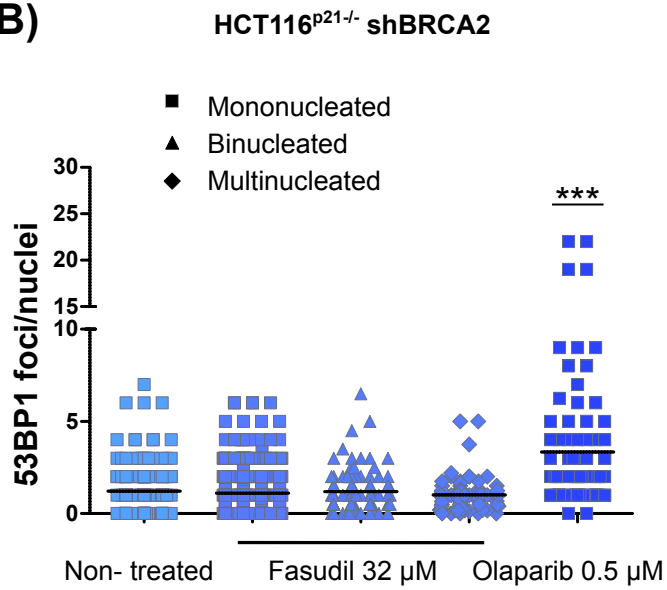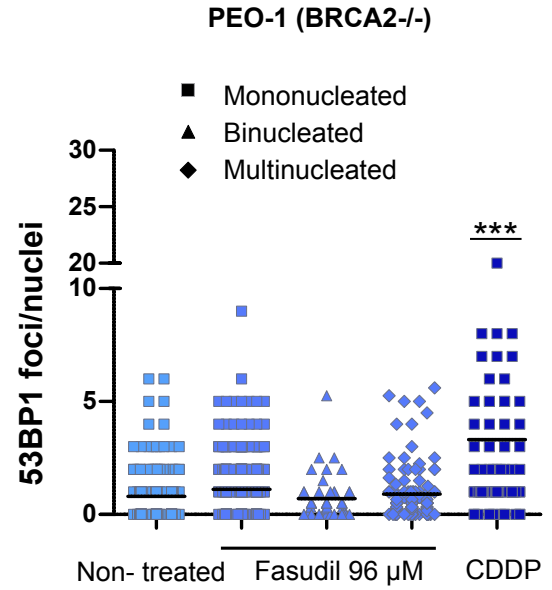

Supplement: supp [file elife-80254-supp-v1.zip]

Figure 2- figure supplement 3

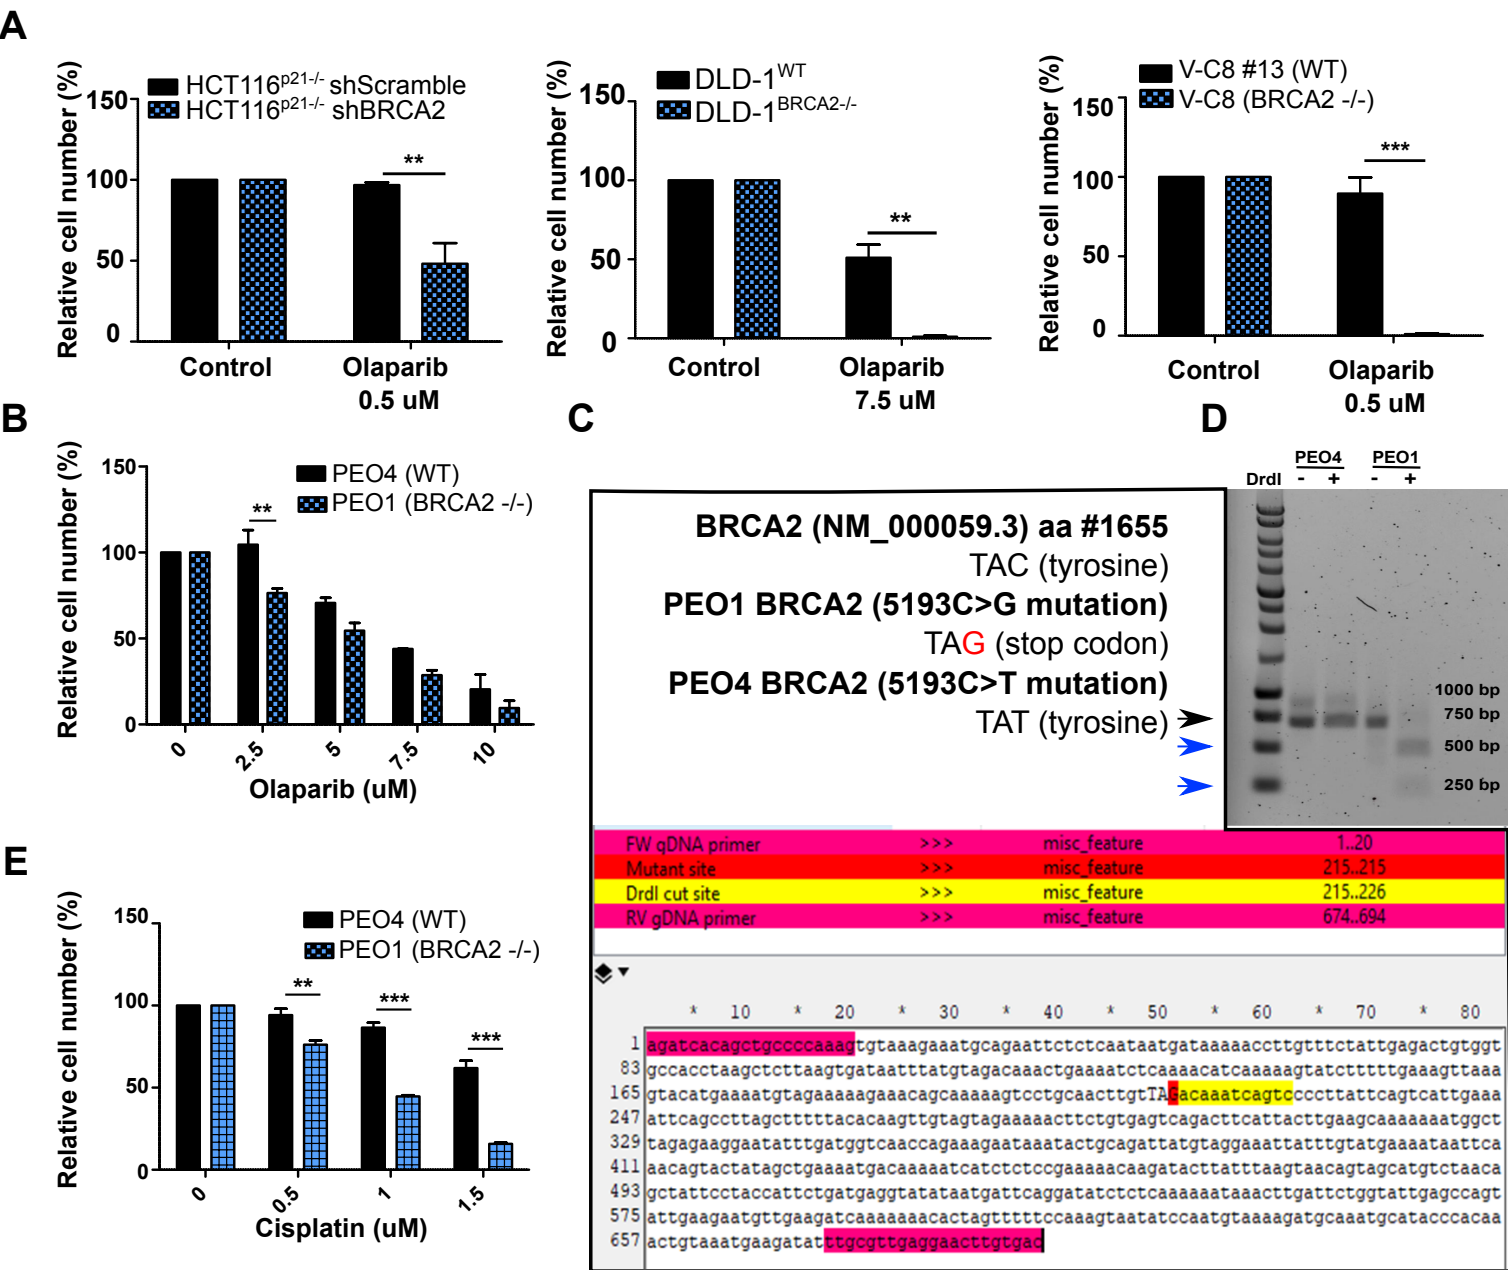

Supplement: supp [file elife-80254-supp-v1.zip]

Figure 7- figure supplement 1

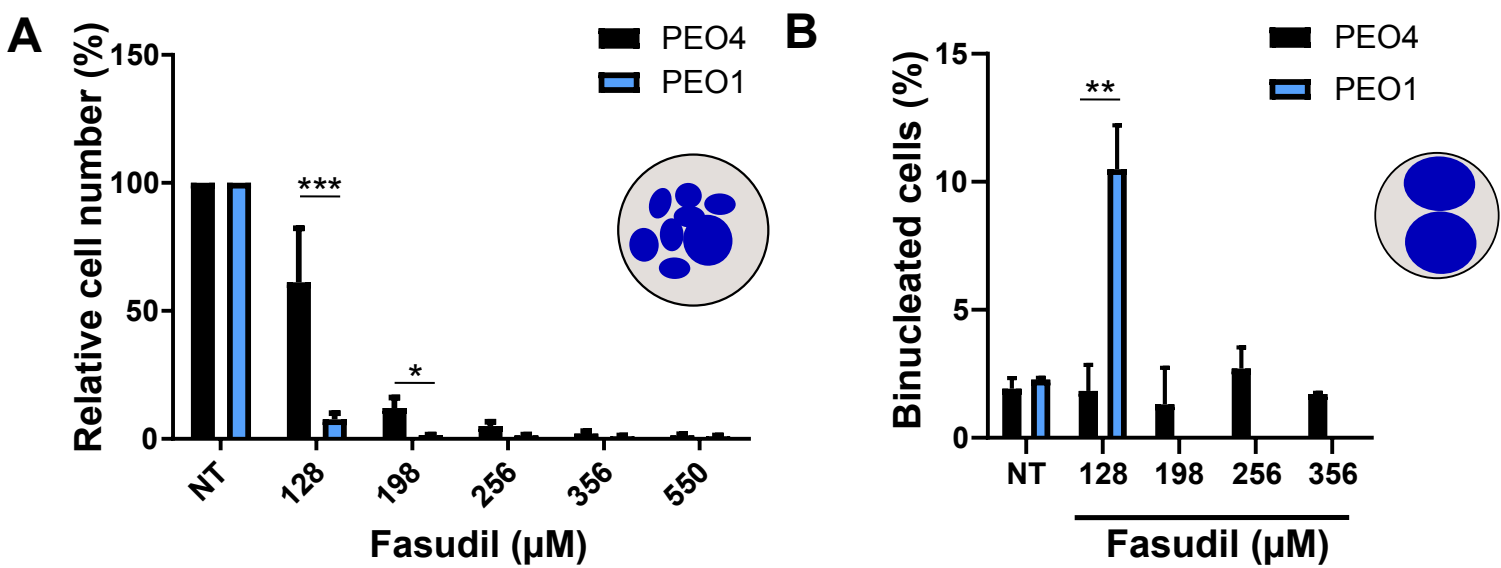

Supplement: supp [file elife-80254-supp-v1.zip]
